# Supplementary material
Source: PubMed Central journal article supplement (PMC7580997)
Supplement: NIHMS1636517-supplement-supplementary.pdf [file NIHMS1636517-supplement-supplementary.pdf]

## Supporting Information

# Aryl-fluorosulfate-based Lysine Covalent pan-Inhibitor of Apoptosis Proteins (IAPs) Antagonists with Cellular Efficacy

*Carlo Baggio<sup>1,3</sup>, Parima Udompholkul<sup>1,3</sup>, Luca Gambini<sup>1</sup>, Ahmed F. Salem<sup>1</sup>, Jennifer Jossart<sup>2</sup>,*

*J. Jefferson P. Perry<sup>2</sup>, and Maurizio Pellecchia<sup>1,\*</sup>*

<sup>1</sup>*Division of Biomedical Sciences, School of Medicine, and* <sup>2</sup>*Department of Biochemistry, College of Natural and Agricultural Sciences, University of California Riverside, 900 University Avenue, Riverside, CA 92521, USA.*

<sup>3</sup>These authors contributed equally to this work

\*Corresponding author: Maurizio Pellecchia, phone number: (951) 827-7829; email address: [maurizio.pellecchia@ucr.edu](mailto:maurizio.pellecchia@ucr.edu)

SI content:

**Figure S1** (page S2): individual thermal shift data plots that generated the data reported in Table 1.

**Figure S2** (page S7): Cell viability data for SK-MEL-28 and A549 cell line.

**Figure S3** (page S8): Solubility at different concentrations in aqueous buffer for the compounds AT-406, LCL161, compound **1**, compound **2**, and compound **3**.

**Figure S4** (page S11): HPLC traces for compounds **1**, **2**, and **3**.

**Figure S5** (page S12): 1D <sup>1</sup>H NMR spectra of compound **2** and compound **3** at 100 μM in d<sub>6</sub>-DMSO.

**Figure S6** (page S14): ratio between the two diastereoisomers of compound **3** observed by <sup>1</sup>H NMR **PDB files** relative to the models prepared for compound **1** in complex with XIAP-BIR3 (page S15), compound **2** in complex with XIAP-BIR3 (page S82), compound **2** in complex with cIAP1-BIR3 (page S154), and compound **2** in complex with cIAP2-BIR3 (page S221).

**Figure S1.** Thermal shift data ( $\Delta T_m$ ) obtained incubating XIAP-BIR3 and ligands for 2 hours at room temperature or 6 hours at 37°C, respectively

### LCL161 2hr

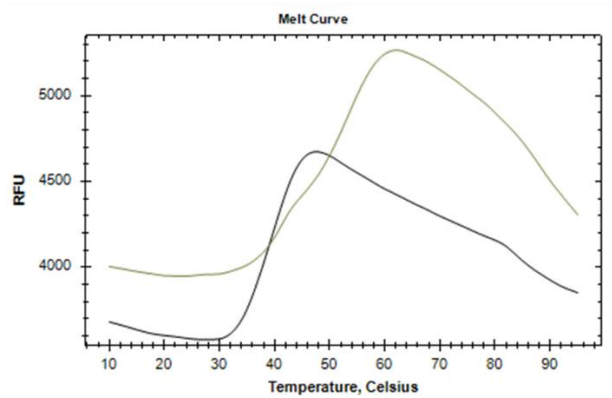

$T_{m \text{ BIR3 WT}} = 39.5^\circ\text{C}$   
 $T_{m \text{ LCL161}} = 58^\circ\text{C}$

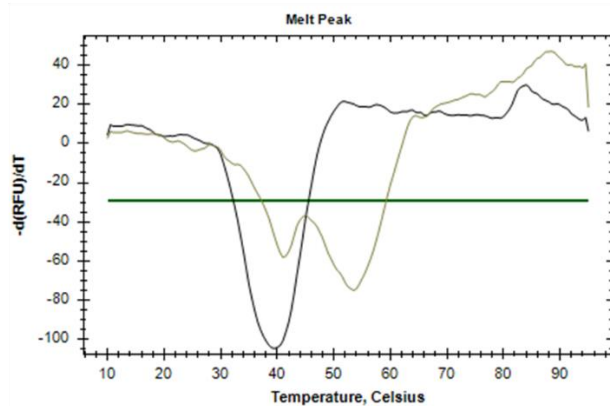

$\Delta T_m = 18.5^\circ\text{C}$

### LCL161 6hr

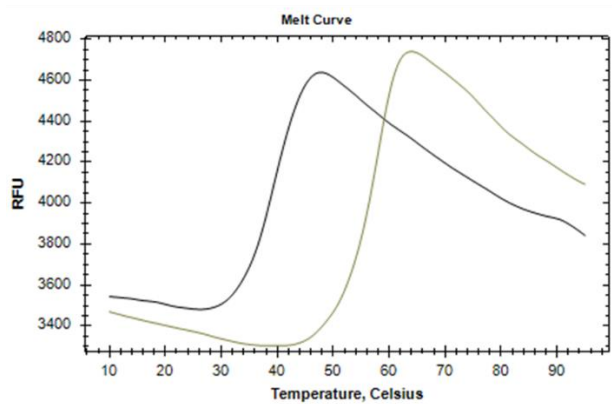

$T_{m \text{ BIR3 WT}} = 39.5^\circ\text{C}$   
 $T_{m \text{ LCL161}} = 53.5^\circ\text{C}$

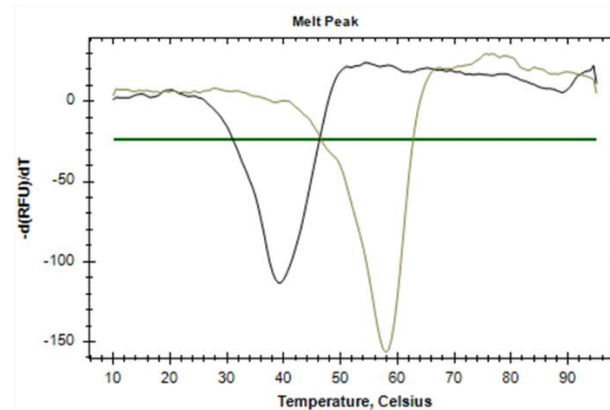

$\Delta T_m = 14^\circ\text{C}$

## AT-406 2hr

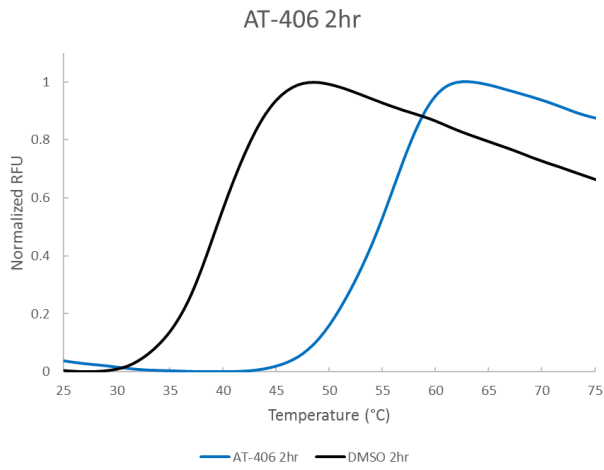

$T_{m \text{ BIR3}} = 39.0 \text{ }^\circ\text{C}$   
 $T_{m \text{ AT-406}} = 56.0 \text{ }^\circ\text{C}$

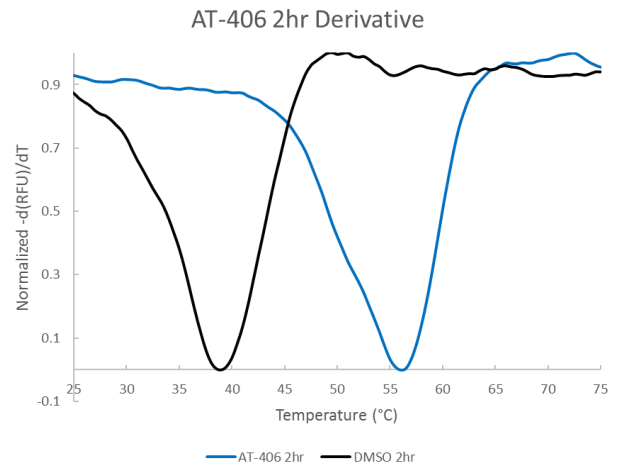

$\Delta T_m = 17.0 \text{ }^\circ\text{C}$

## AT-406 6hr

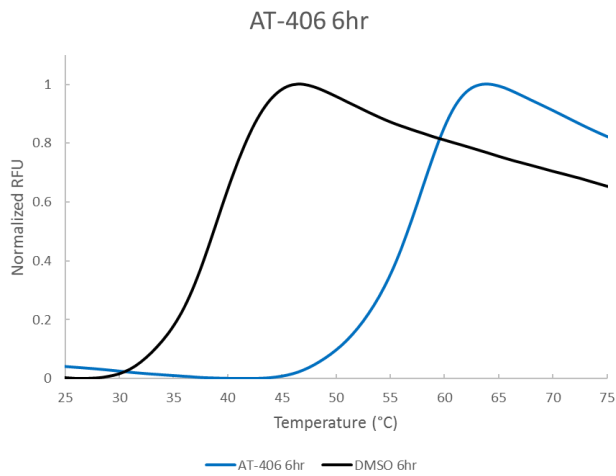

$T_{m \text{ BIR3}} = 39.0 \text{ }^\circ\text{C}$   
 $T_{m \text{ AT-406}} = 58.0 \text{ }^\circ\text{C}$

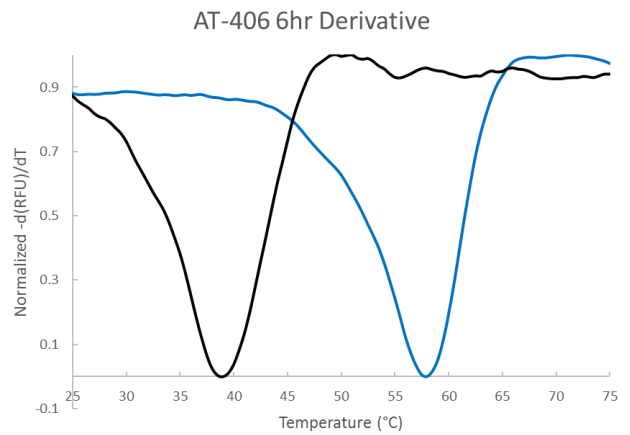

$\Delta T_m = 19.0 \text{ }^\circ\text{C}$

## Compound 1 2hr

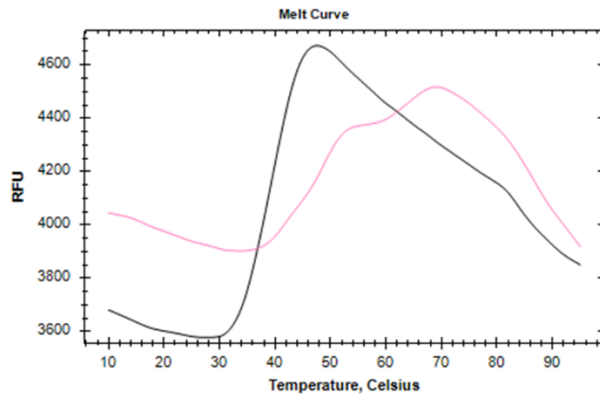

$T_{m \text{ BIR3 WT}} = 39.5^{\circ}\text{C}$   
 $T_{m \text{ 142B12}} = 49^{\circ}\text{C}$

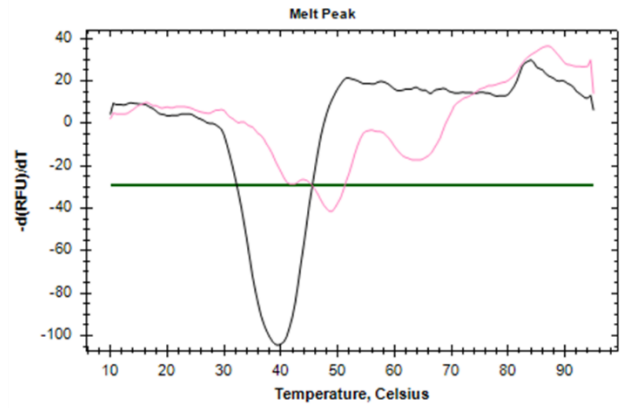

$\Delta T_m = 9.5^{\circ}\text{C}$

## Compound 1 6hr

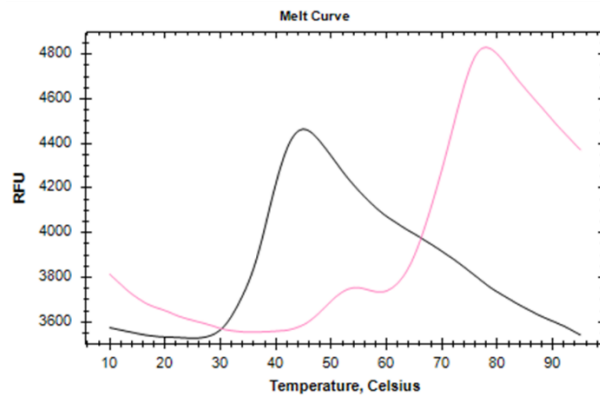

$T_{m \text{ BIR3 WT}} = 38.5^{\circ}\text{C}$   
 $T_{m \text{ 142B12}} = 72^{\circ}\text{C}$

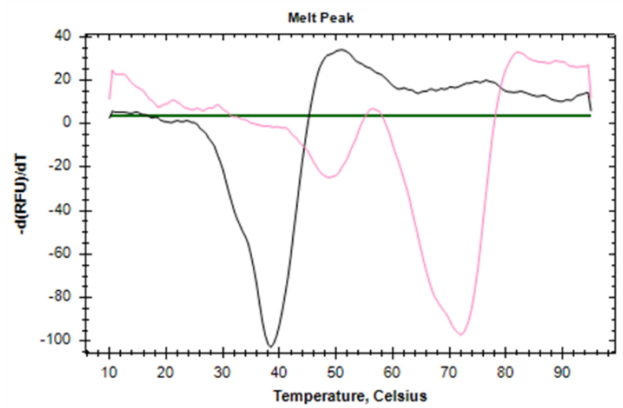

$\Delta T_m = 33.5^{\circ}\text{C}$

# Compound 2 2hr

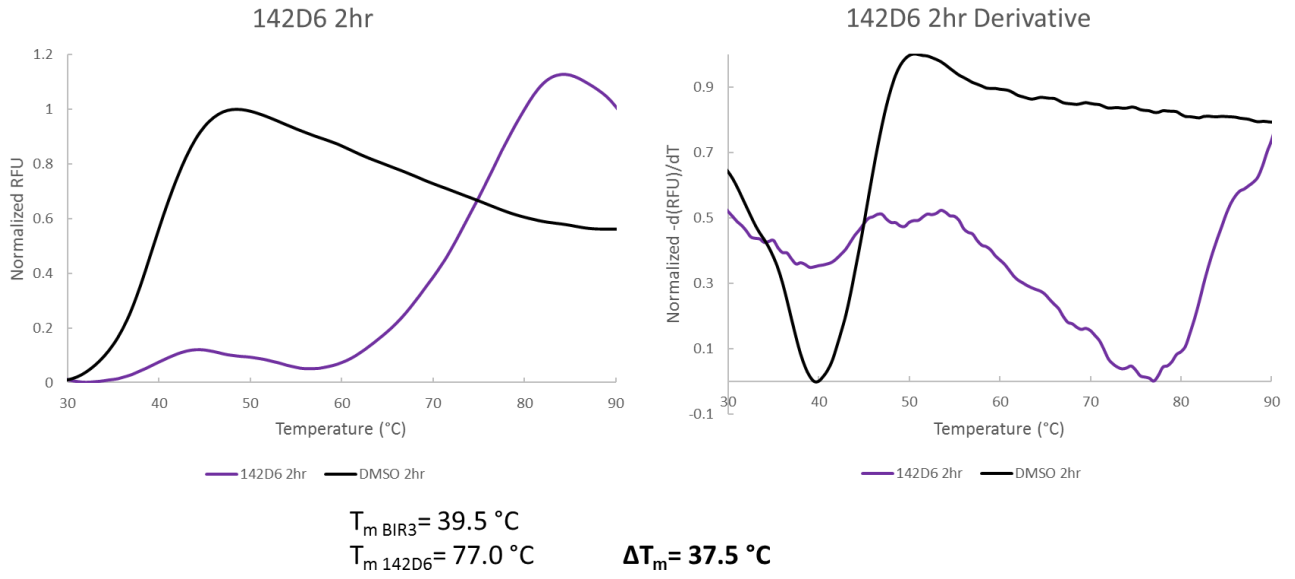

# Compound 2 6hr

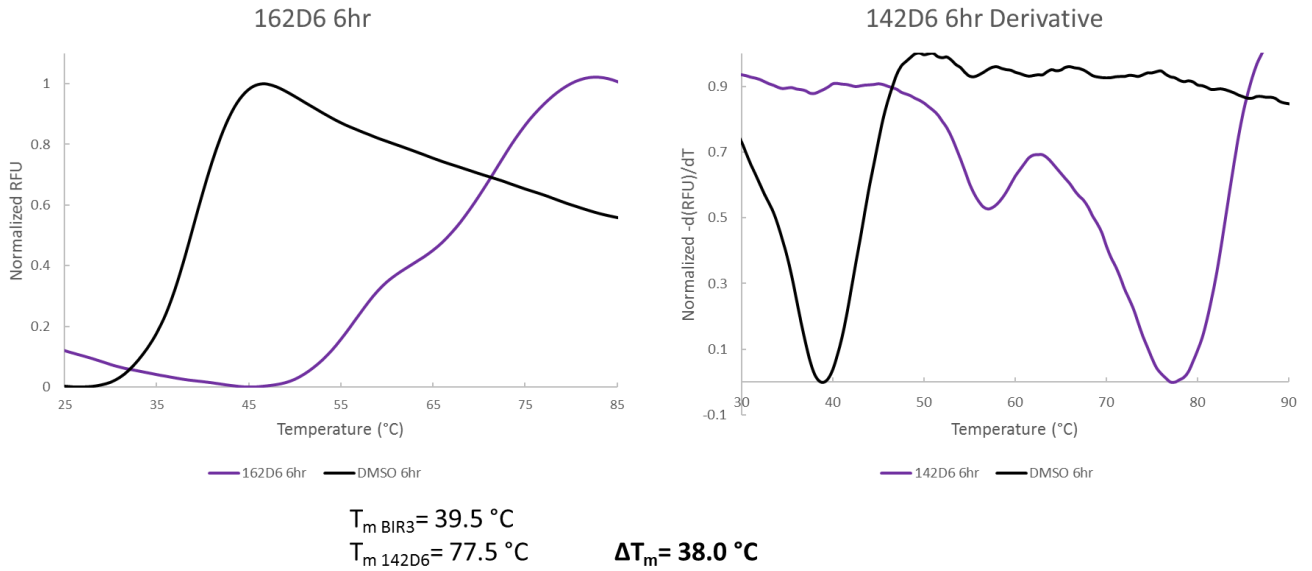

## Compound 3 2hr

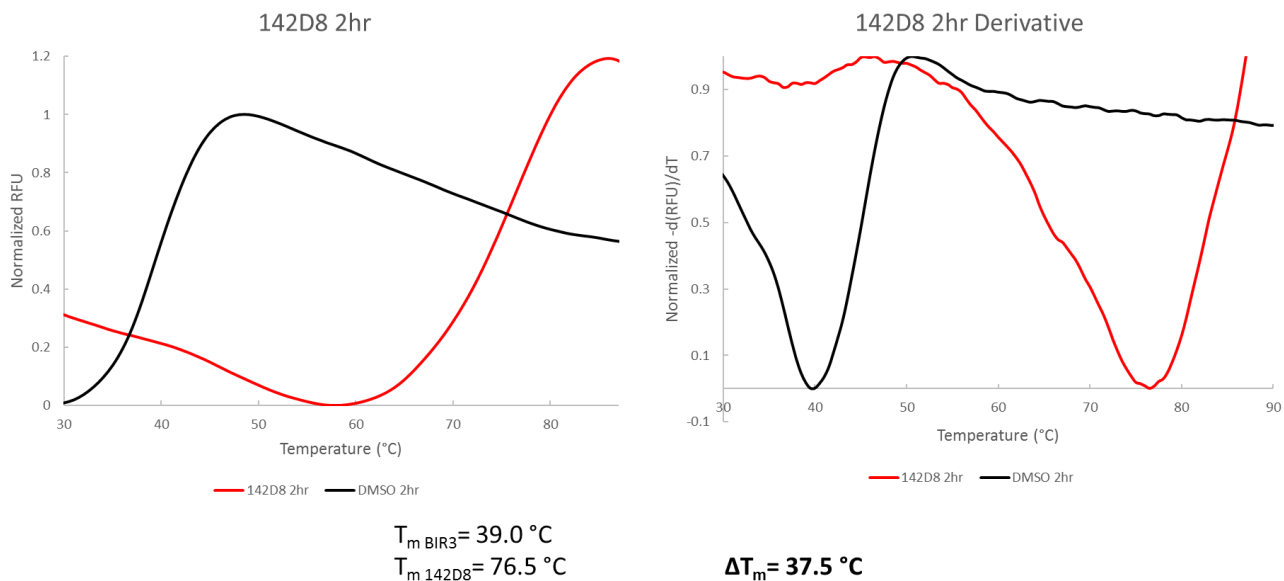

## Compound 3 6hr

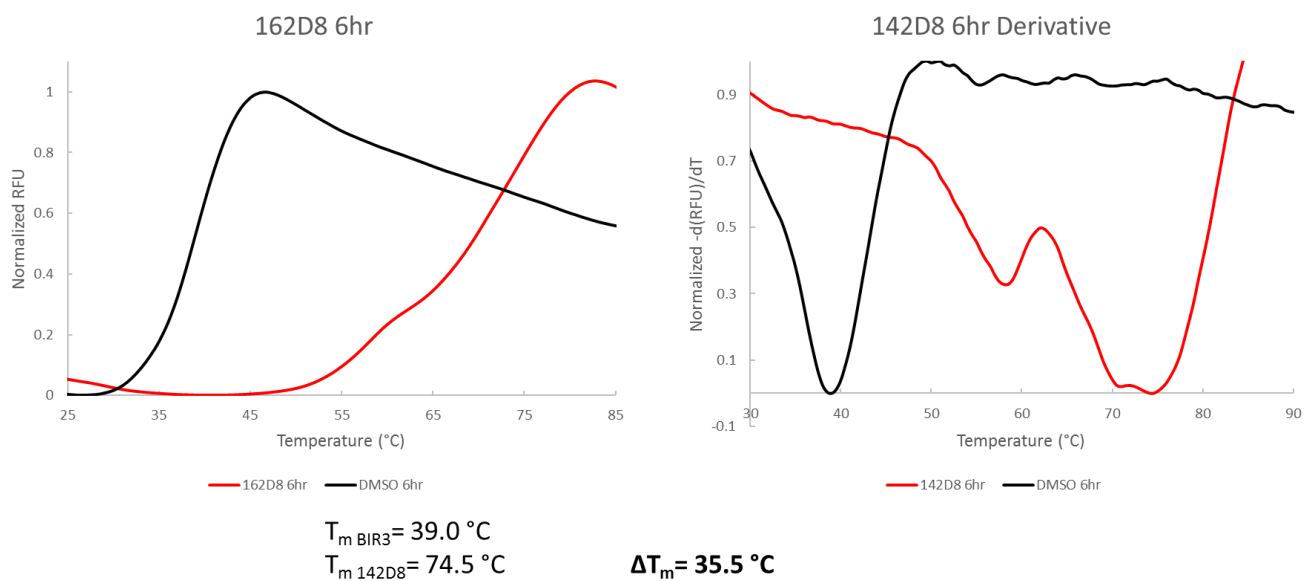

**Figure S2.** SK-MEL-28 NuLight (top) and A549 NuLight (bottom) cells showing red nuclei were plated at  $5 \times 10^3$  cells per well, treated with various compounds and normalized to 1% DMSO (v/v) control in the presence or absence of 1 ng/mL TNF $\alpha$ . Cells were imaged every 3 h for 4 days and analyzed with the IncuCyte S3 live-cell analysis system.

### Cell viability SK-MEL-28

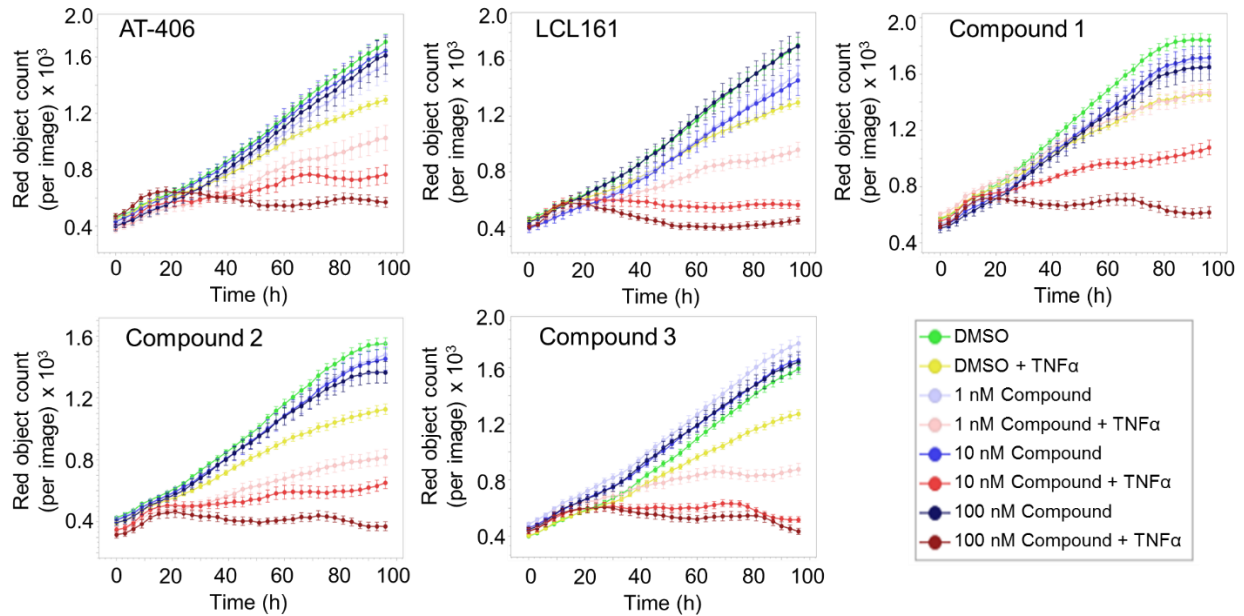

### Cell viability A549

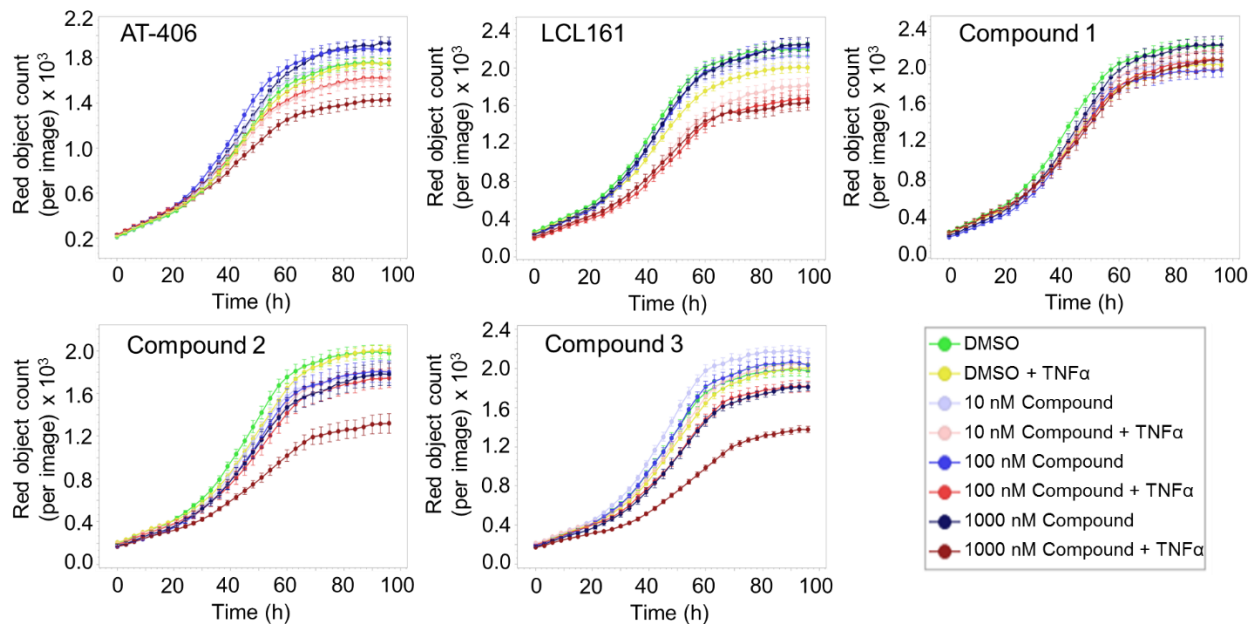

### Figure S3

1D  $^1\text{H}$  NMR based solubility determinations of agents in aqueous buffer. The agents tested were AT-406, LCL161, compound **1**, compound **2**, and compound **3**. For compounds AT-406, LCL161, compound **1**, and compound **2** the spectra were collected at 100  $\mu\text{M}$ , 250  $\mu\text{M}$ , 500  $\mu\text{M}$ , 1 mM, and 2 mM. For compound **3**, spectra were collected at 200  $\mu\text{M}$ , 500  $\mu\text{M}$ , and 1 mM.

#### AT-406

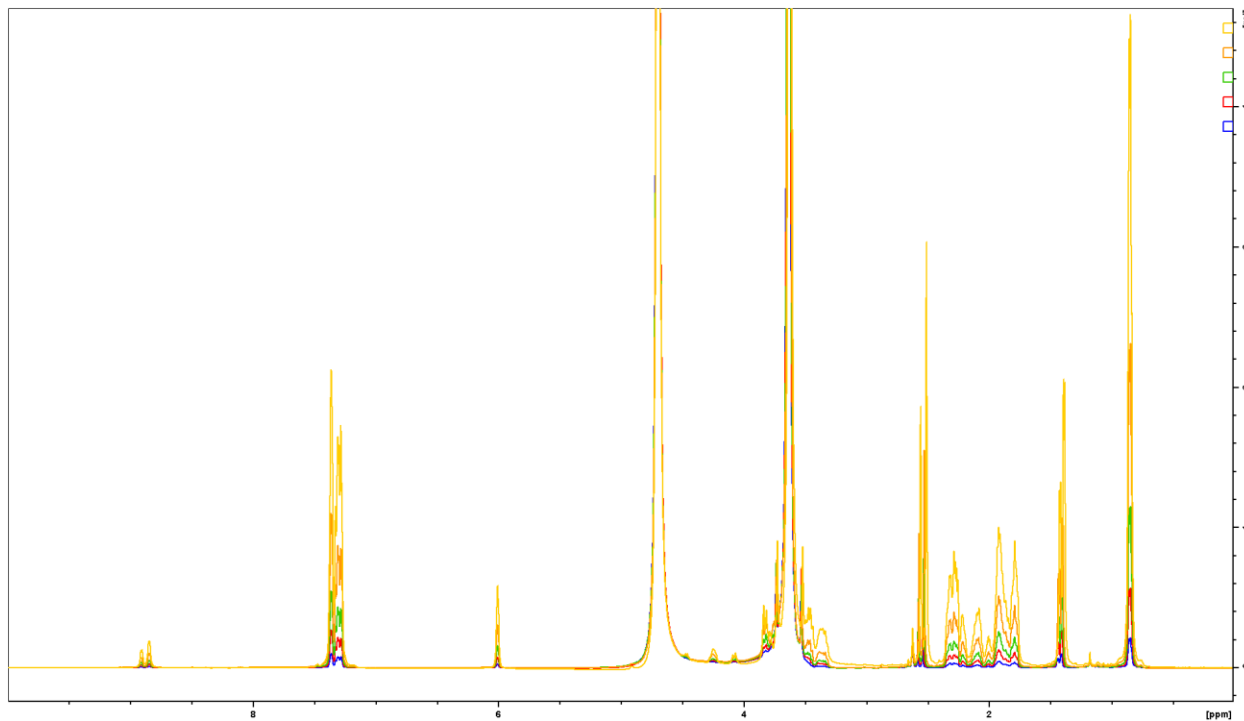



**LCL161**

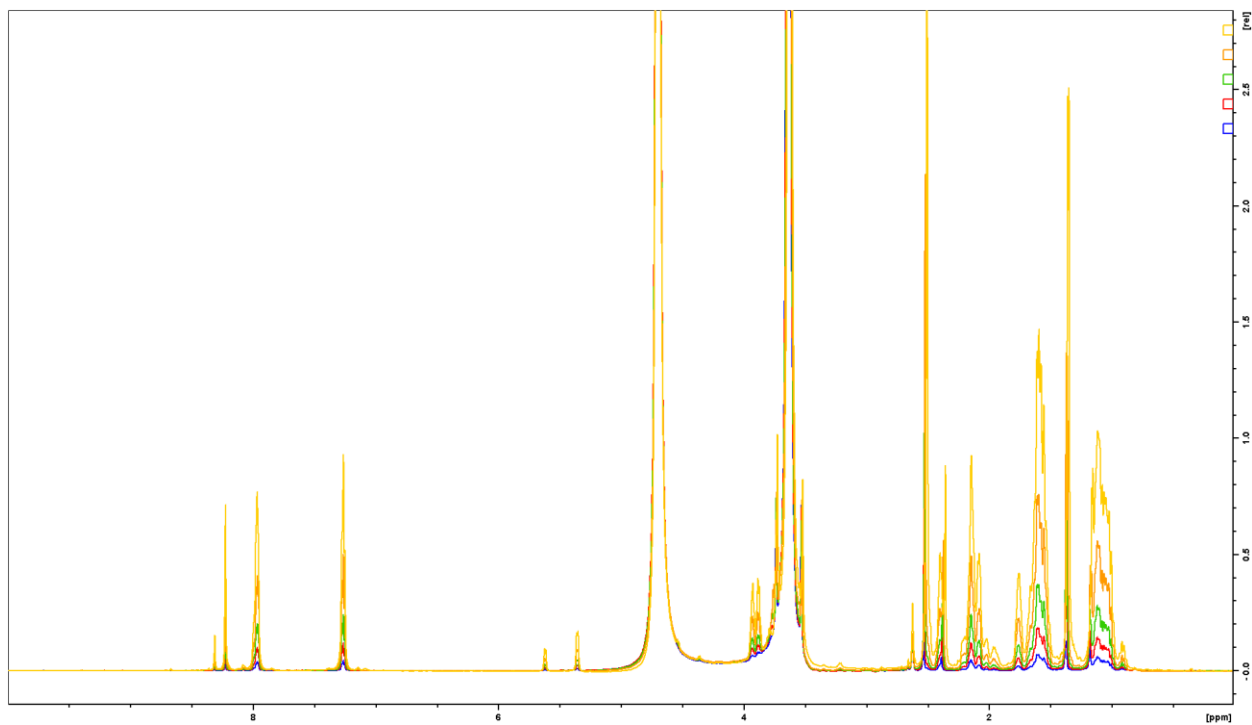

**Compound 1**

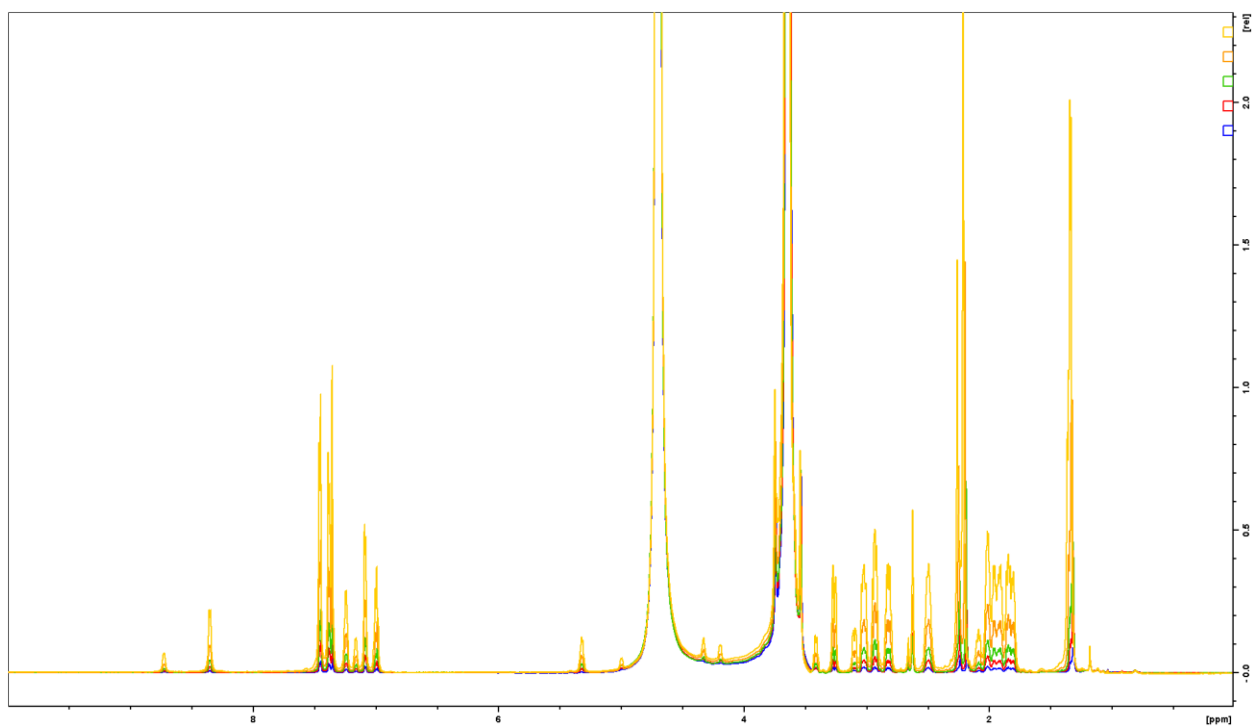

## Compound 2

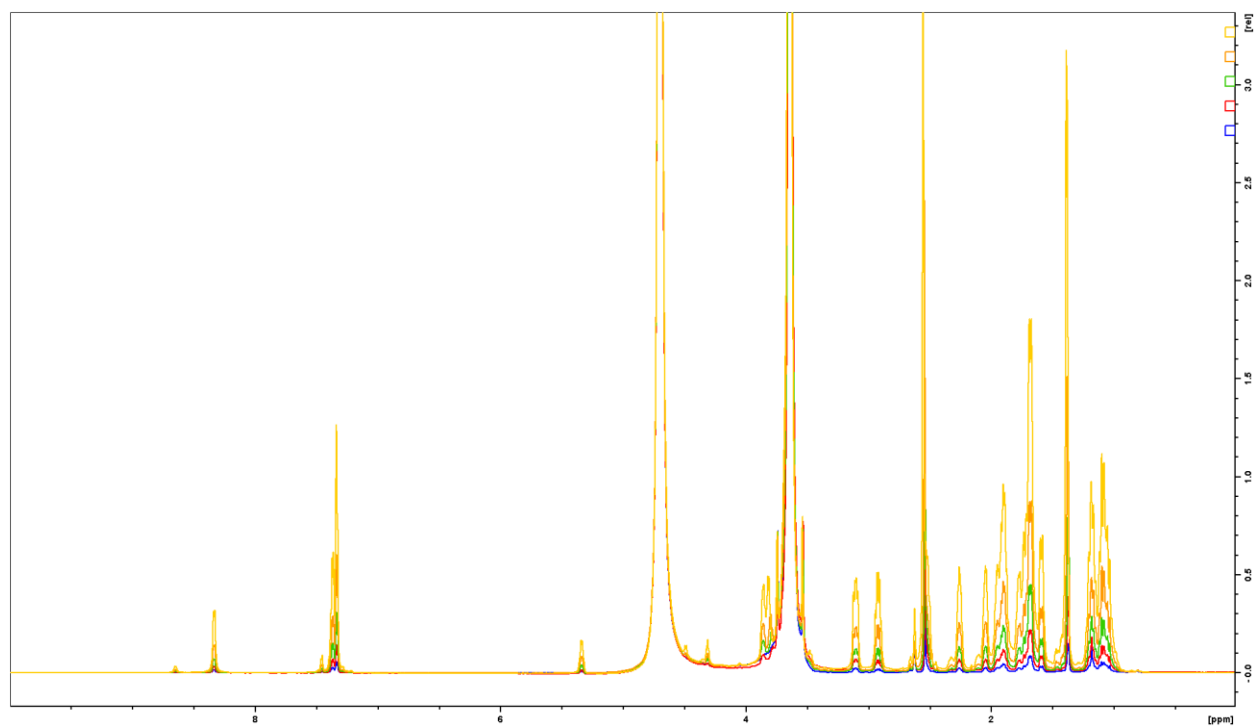

## Compound 3

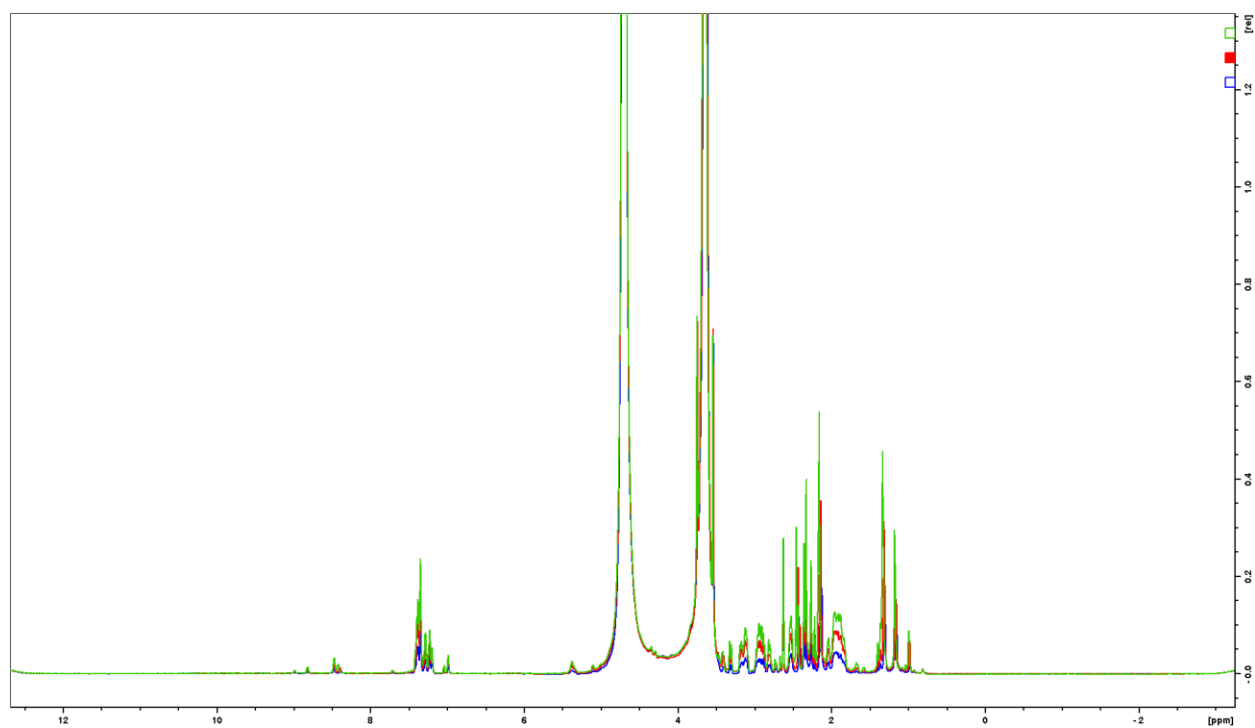

**Figure S4.** HPLC traces for tested compounds. Purification was accomplished using an Atlantis T3 3 $\mu$ m 4.6x150mm column (H<sub>2</sub>O/ACN gradient from 5% to 100% in 45min). All compounds displayed purity >95%.

### Compound 1

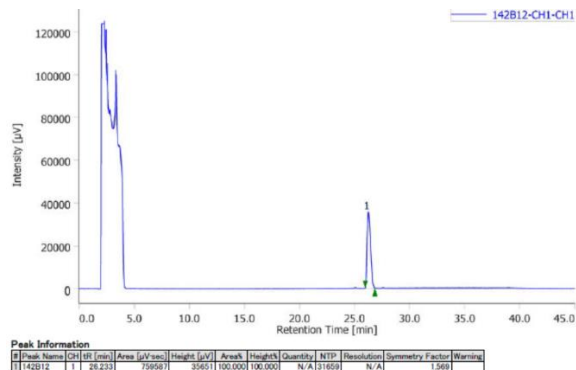

### Compound 2

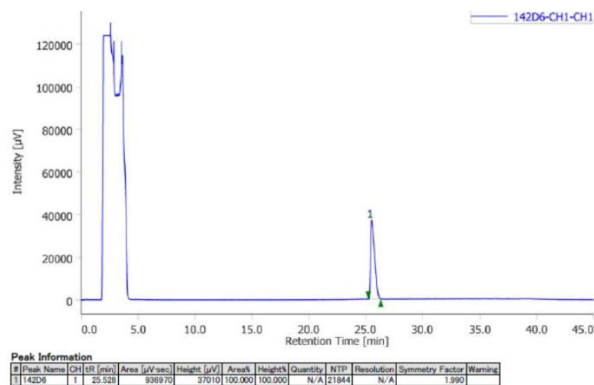

### Compound 3

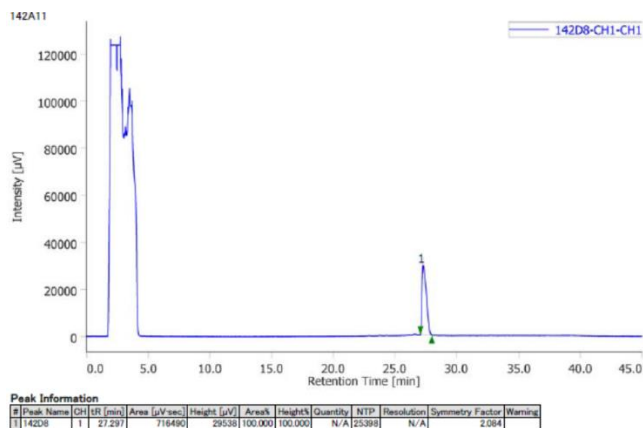

## Figure S5

1D  $^1\text{H}$  NMR spectra of **compound 2** and **compound 3** at 100  $\mu\text{M}$  in  $\text{d}_6\text{-DMSO}$ .

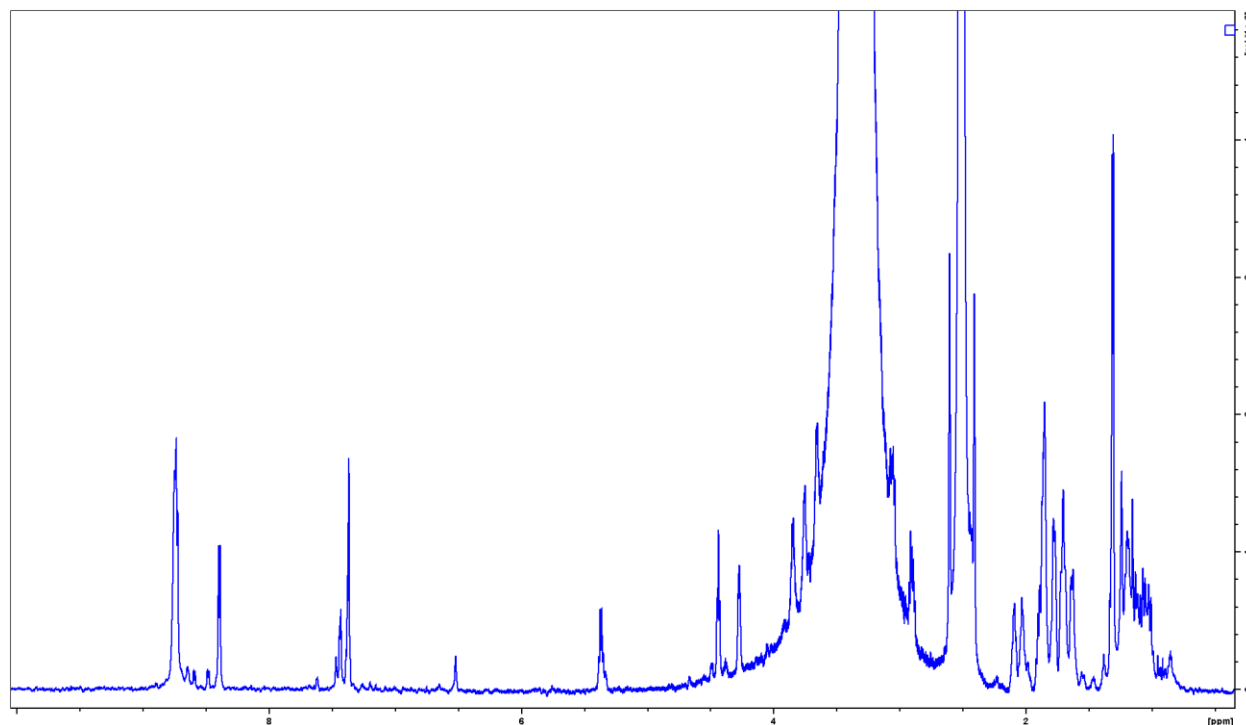

**Compound 2:**  $^1\text{H}$  NMR (700 MHz,  $\text{DMSO-d}_6$ ):  $\delta$  8.74 (m, 3H), 8.1 (d,  $J = 8.39$  Hz, 1H), 7.50-7.35 (m, 2H), 5.36 (m, 1H), 4.44 (t, 1H), 4.27 (t, 1H), 2.13-1.95 (m, 2H), 1.91-1.58 (m, 10H), 1.30 (d,  $J = 6.4$  Hz, 3H), 1.27-0.83 (m, 10H)

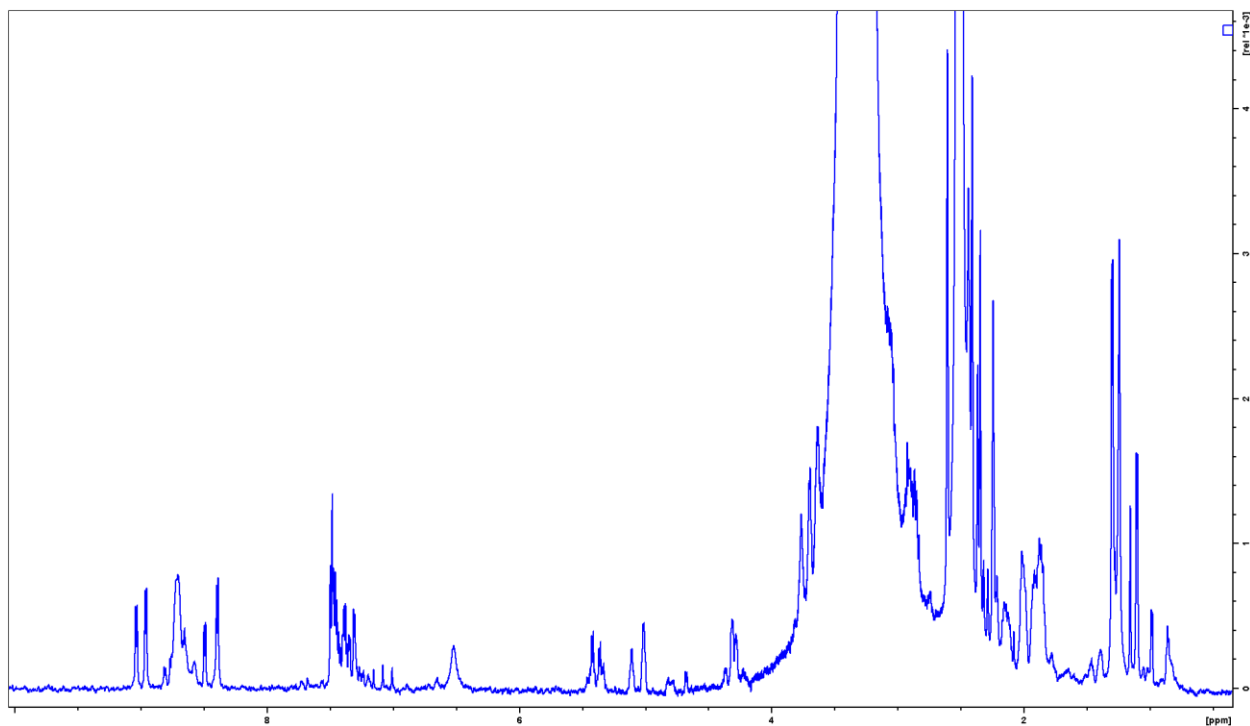

**Compound 3:**  $^1\text{H}$  NMR (700 MHz, DMSO- $d_6$ ):  $\delta$  9.03 (d,  $J$  = 8.42 Hz, 1H), 8.96 (d,  $J$  = 8.11 Hz, 1H), 8.78 – 8.60 (m, 6H), 8.49 (d,  $J$  = 8.73 Hz, 1H), 8.39 (d,  $J$  = 8.73 Hz, 1H), 7.52 – 6.98 (m, 9H), 6.51 (m, 2H), 5.49 – 5.30 (m, 2H), 5.11 (m, 1H), 5.01 (m, 1H), 4.39 – 4.24 (m, 2H), 2.05 – 1.80 (m, 13H), 1.29 (d,  $J$  = 6.45 Hz, 6H), 1.24 (s, 6H), 1.15 (s, 1H), 1.10 (d,  $J$  = 6.45 Hz, 3H), 0.98 (d,  $J$  = 6.7 Hz, 1H).

## Figure S6

1D  $^1\text{H}$  NMR spectra of the amide region of **compound 3** at 100  $\mu\text{M}$  in  $\text{d}_6\text{-DMSO}$ . The presence of 4 amide signals indicate the presence of the 2 diastereomer, both at almost half concentration compared to other agents. The ratio between the two diastereomer is close to 1:1.

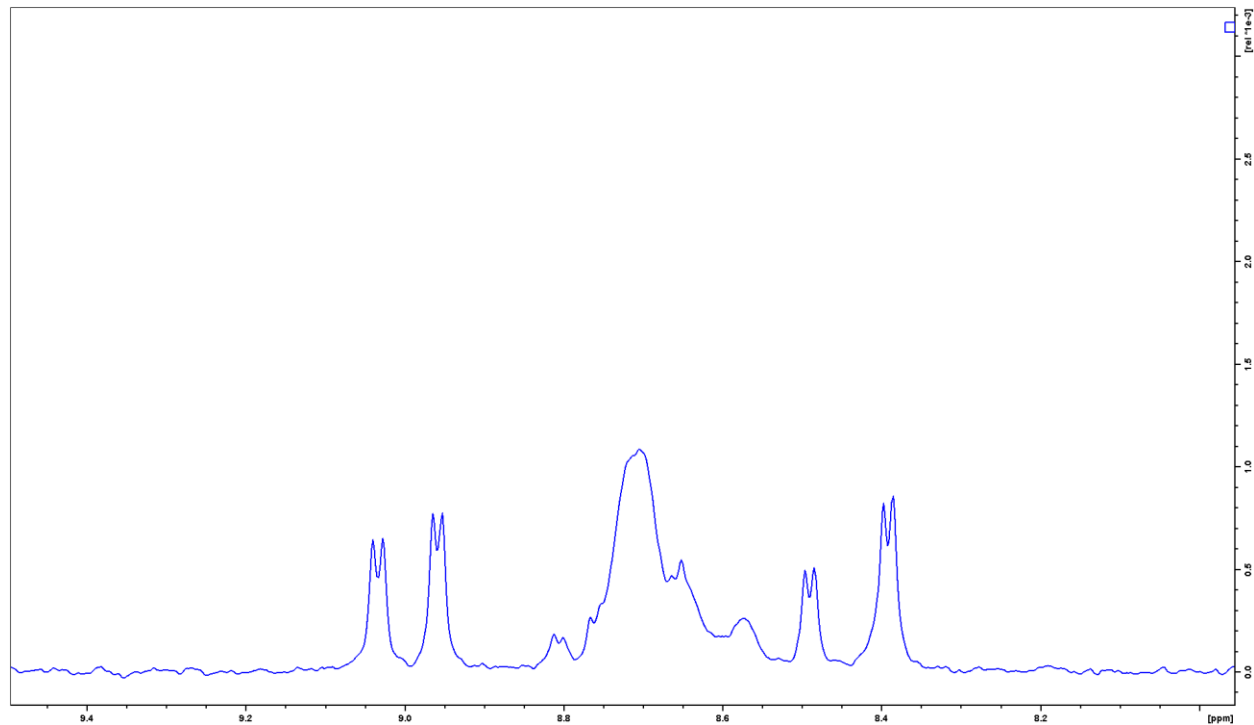

## XIAP-BIR3 + compound 1 .mol2 file

@<TRIPOS>MOLECULE  
3HL5.B  
1466 1495 91 0 0  
BIOPOLYMER  
USER\_CHARGES

### @<TRIPOS>ATOM

|          |         |         |         |      |   |        |         |
|----------|---------|---------|---------|------|---|--------|---------|
| 1 N      | 2.1170  | -0.3132 | -4.3406 | N.3  | 1 | LEU256 | -0.9900 |
| BACKBONE |         |         |         |      |   |        |         |
| 2 H1     | 2.0332  | -0.5642 | -5.3153 | H    | 1 | LEU256 | 0.3600  |
| 3 H2     | 1.3268  | -0.6796 | -3.8295 | H    | 1 | LEU256 | 0.3600  |
| 4 CA     | 2.1479  | 1.1767  | -4.2103 | C.3  | 1 | LEU256 | 0.2510  |
| BACKBONE |         |         |         |      |   |        |         |
| 5 HA     | 3.0279  | 1.5350  | -4.7445 | H    | 1 | LEU256 | 0.0800  |
| 6 C      | 2.2746  | 1.6066  | -2.7445 | C.2  | 1 | LEU256 | 0.5690  |
| BACKBONE |         |         |         |      |   |        |         |
| 7 O      | 1.5872  | 1.0512  | -1.8812 | O.2  | 1 | LEU256 | -0.5700 |
| BACKBONE |         |         |         |      |   |        |         |
| 8 CB     | 0.8991  | 1.8054  | -4.8442 | C.3  | 1 | LEU256 | -0.1600 |
| 9 HB2    | 0.0372  | 1.3970  | -4.3165 | H    | 1 | LEU256 | 0.0800  |
| 10 HB3   | 0.9600  | 2.8788  | -4.6646 | H    | 1 | LEU256 | 0.0800  |
| 11 CG    | 0.6313  | 1.6198  | -6.3444 | C.3  | 1 | LEU256 | -0.0800 |
| 12 HG    | 0.4927  | 0.5526  | -6.5172 | H    | 1 | LEU256 | 0.0800  |
| 13 CD1   | -0.6274 | 2.3690  | -6.7515 | C.3  | 1 | LEU256 | -0.2400 |
| 14 HD11  | -0.4872 | 3.4359  | -6.5782 | H    | 1 | LEU256 | 0.0800  |
| 15 HD12  | -1.4701 | 2.0122  | -6.1592 | H    | 1 | LEU256 | 0.0800  |
| 16 HD13  | -0.8273 | 2.1958  | -7.8089 | H    | 1 | LEU256 | 0.0800  |
| 17 CD2   | 1.8066  | 2.0728  | -7.2003 | C.3  | 1 | LEU256 | -0.2400 |
| 18 HD21  | 1.9743  | 3.1396  | -7.0519 | H    | 1 | LEU256 | 0.0800  |
| 19 HD22  | 1.5860  | 1.8824  | -8.2506 | H    | 1 | LEU256 | 0.0800  |
| 20 HD23  | 2.7008  | 1.5208  | -6.9110 | H    | 1 | LEU256 | 0.0800  |
| 21 N     | 3.1508  | 2.5933  | -2.4523 | N.am | 2 | PRO257 | -0.2548 |
| BACKBONE |         |         |         |      |   |        |         |
| 22 CA    | 4.0107  | 3.3225  | -3.3975 | C.3  | 2 | PRO257 | -0.0266 |
| BACKBONE |         |         |         |      |   |        |         |
| 23 HA    | 3.4546  | 3.6609  | -4.2717 | H    | 2 | PRO257 | 0.0641  |
| 24 C     | 5.1380  | 2.4535  | -3.9503 | C.2  | 2 | PRO257 | 0.5896  |
| BACKBONE |         |         |         |      |   |        |         |
| 25 O     | 5.6310  | 1.5678  | -3.2440 | O.2  | 2 | PRO257 | -0.5748 |
| BACKBONE |         |         |         |      |   |        |         |
| 26 CB    | 4.5894  | 4.4593  | -2.5470 | C.3  | 2 | PRO257 | -0.0070 |
| 27 HB2   | 5.6165  | 4.6738  | -2.8422 | H    | 2 | PRO257 | 0.0253  |
| 28 HB3   | 3.9857  | 5.3609  | -2.6510 | H    | 2 | PRO257 | 0.0253  |
| 29 CG    | 4.5421  | 3.9585  | -1.1516 | C.3  | 2 | PRO257 | 0.0189  |
| 30 HG2   | 4.4457  | 4.7910  | -0.4547 | H    | 2 | PRO257 | 0.0213  |
| 31 HG3   | 5.4466  | 3.3953  | -0.9217 | H    | 2 | PRO257 | 0.0213  |
| 32 CD    | 3.3368  | 3.0654  | -1.0656 | C.3  | 2 | PRO257 | 0.0192  |
| 33 HD2   | 2.4641  | 3.6222  | -0.7242 | H    | 2 | PRO257 | 0.0391  |
| 34 HD3   | 3.5205  | 2.2287  | -0.3915 | H    | 2 | PRO257 | 0.0391  |

|          |         |         |          |       |   |        |         |
|----------|---------|---------|----------|-------|---|--------|---------|
| 35 N     | 5.5373  | 2.7138  | -5.1965  | N.am  | 3 | ARG258 | -0.3479 |
| BACKBONE |         |         |          |       |   |        |         |
| 36 H     | 5.0834  | 3.4563  | -5.7092  | H     | 3 | ARG258 | 0.2747  |
| 37 CA    | 6.6169  | 1.9557  | -5.8494  | C.3   | 3 | ARG258 | -0.2637 |
| BACKBONE |         |         |          |       |   |        |         |
| 38 HA    | 6.3002  | 0.9130  | -5.8252  | H     | 3 | ARG258 | 0.1560  |
| 39 C     | 7.9501  | 2.0638  | -5.1019  | C.2   | 3 | ARG258 | 0.7341  |
| BACKBONE |         |         |          |       |   |        |         |
| 40 O     | 8.7036  | 1.0902  | -5.0371  | O.2   | 3 | ARG258 | -0.5894 |
| BACKBONE |         |         |          |       |   |        |         |
| 41 CB    | 6.8112  | 2.3870  | -7.3111  | C.3   | 3 | ARG258 | -0.0007 |
| 42 HB2   | 7.1412  | 3.4258  | -7.3126  | H     | 3 | ARG258 | 0.0327  |
| 43 HB3   | 7.5886  | 1.7582  | -7.7451  | H     | 3 | ARG258 | 0.0327  |
| 44 CG    | 5.5701  | 2.2860  | -8.2057  | C.3   | 3 | ARG258 | 0.0390  |
| 45 HG2   | 5.7377  | 2.8993  | -9.0911  | H     | 3 | ARG258 | 0.0285  |
| 46 HG3   | 4.7172  | 2.6756  | -7.6501  | H     | 3 | ARG258 | 0.0285  |
| 47 CD    | 5.2356  | 0.8745  | -8.6618  | C.3   | 3 | ARG258 | 0.0486  |
| 48 HD2   | 5.0617  | 0.2462  | -7.7883  | H     | 3 | ARG258 | 0.0687  |
| 49 HD3   | 6.0711  | 0.4748  | -9.2363  | H     | 3 | ARG258 | 0.0687  |
| 50 NE    | 4.0340  | 0.8819  | -9.4982  | N.pl3 | 3 | ARG258 | -0.5295 |
| 51 HE    | 3.7693  | 1.7587  | -9.9241  | H     | 3 | ARG258 | 0.3456  |
| 52 CZ    | 3.2621  | -0.1760 | -9.7421  | C.cat | 3 | ARG258 | 0.8076  |
| 53 NH1   | 3.5506  | -1.3644 | -9.2255  | N.pl3 | 3 | ARG258 | -0.8627 |
| 54 HH12  | 4.3673  | -1.4767 | -8.6419  | H     | 3 | ARG258 | 0.4478  |
| 55 HH11  | 2.9533  | -2.1563 | -9.4160  | H     | 3 | ARG258 | 0.4478  |
| 56 NH2   | 2.1866  | -0.0402 | -10.5072 | N.pl3 | 3 | ARG258 | -0.8627 |
| 57 HH21  | 1.9574  | 0.8612  | -10.9008 | H     | 3 | ARG258 | 0.4478  |
| 58 HH22  | 1.5972  | -0.8384 | -10.6960 | H     | 3 | ARG258 | 0.4478  |
| 59 N     | 8.2364  | 3.2494  | -4.5601  | N.am  | 4 | ASN259 | -0.4157 |
| BACKBONE |         |         |          |       |   |        |         |
| 60 H     | 7.6021  | 4.0196  | -4.7165  | H     | 4 | ASN259 | 0.2719  |
| 61 CA    | 9.4365  | 3.4791  | -3.7456  | C.3   | 4 | ASN259 | 0.0143  |
| BACKBONE |         |         |          |       |   |        |         |
| 62 HA    | 9.8697  | 2.4984  | -3.5488  | H     | 4 | ASN259 | 0.1048  |
| 63 C     | 9.1202  | 4.0968  | -2.3725  | C.2   | 4 | ASN259 | 0.5973  |
| BACKBONE |         |         |          |       |   |        |         |
| 64 O     | 9.1271  | 5.3237  | -2.2168  | O.2   | 4 | ASN259 | -0.5679 |
| BACKBONE |         |         |          |       |   |        |         |
| 65 CB    | 10.4723 | 4.3243  | -4.5116  | C.3   | 4 | ASN259 | -0.2041 |
| 66 HB2   | 10.0943 | 5.3429  | -4.5989  | H     | 4 | ASN259 | 0.0797  |
| 67 HB3   | 10.6020 | 3.8984  | -5.5065  | H     | 4 | ASN259 | 0.0797  |
| 68 CG    | 11.8361 | 4.3665  | -3.8161  | C.2   | 4 | ASN259 | 0.7130  |
| 69 OD1   | 12.0019 | 3.8675  | -2.7009  | O.2   | 4 | ASN259 | -0.5931 |
| 70 ND2   | 12.8182 | 4.9674  | -4.4817  | N.am  | 4 | ASN259 | -0.9191 |
| 71 HD22  | 12.6413 | 5.3639  | -5.3936  | H     | 4 | ASN259 | 0.4196  |
| 72 HD21  | 13.7408 | 5.0273  | -4.0752  | H     | 4 | ASN259 | 0.4196  |
| 73 N     | 8.8499  | 3.2402  | -1.3667  | N.am  | 5 | PRO260 | -0.2548 |
| BACKBONE |         |         |          |       |   |        |         |
| 74 CA    | 8.5077  | 3.6981  | -0.0188  | C.3   | 5 | PRO260 | -0.0266 |
| BACKBONE |         |         |          |       |   |        |         |
| 75 HA    | 7.6949  | 4.4235  | -0.0567  | H     | 5 | PRO260 | 0.0641  |



|          |         |        |              |          |         |
|----------|---------|--------|--------------|----------|---------|
| 76 C     | 9.6204  | 4.4645 | 0.6988 C.2   | 5 PRO260 | 0.5896  |
| BACKBONE |         |        |              |          |         |
| 77 O     | 9.3231  | 5.2518 | 1.5944 O.2   | 5 PRO260 | -0.5748 |
| BACKBONE |         |        |              |          |         |
| 78 CB    | 8.1613  | 2.4026 | 0.7269 C.3   | 5 PRO260 | -0.0070 |
| 79 HB2   | 8.5400  | 2.4369 | 1.7484 H     | 5 PRO260 | 0.0253  |
| 80 HB3   | 7.0823  | 2.2489 | 0.7445 H     | 5 PRO260 | 0.0253  |
| 81 CG    | 8.8247  | 1.3261 | -0.0348 C.3  | 5 PRO260 | 0.0189  |
| 82 HG2   | 8.2779  | 0.3898 | 0.0775 H     | 5 PRO260 | 0.0213  |
| 83 HG3   | 9.8493  | 1.1923 | 0.3121 H     | 5 PRO260 | 0.0213  |
| 84 CD    | 8.8127  | 1.7697 | -1.4715 C.3  | 5 PRO260 | 0.0192  |
| 85 HD2   | 7.9062  | 1.4361 | -1.9766 H    | 5 PRO260 | 0.0391  |
| 86 HD3   | 9.6854  | 1.3930 | -2.0049 H    | 5 PRO260 | 0.0391  |
| 87 N     | 10.8775 | 4.2642 | 0.2986 N.am  | 6 SER261 | -0.4157 |
| BACKBONE |         |        |              |          |         |
| 88 H     | 11.0655 | 3.5803 | -0.4205 H    | 6 SER261 | 0.2719  |
| 89 CA    | 11.9940 | 5.0199 | 0.8844 C.3   | 6 SER261 | -0.0249 |
| BACKBONE |         |        |              |          |         |
| 90 HA    | 11.8913 | 4.9441 | 1.9669 H     | 6 SER261 | 0.0843  |
| 91 C     | 11.9440 | 6.5045 | 0.5179 C.2   | 6 SER261 | 0.5973  |
| BACKBONE |         |        |              |          |         |
| 92 O     | 12.6204 | 7.3400 | 1.1377 O.2   | 6 SER261 | -0.5679 |
| BACKBONE |         |        |              |          |         |
| 93 CB    | 13.3392 | 4.4190 | 0.4683 C.3   | 6 SER261 | 0.2117  |
| 94 HB2   | 13.2591 | 3.3319 | 0.4714 H     | 6 SER261 | 0.0352  |
| 95 HB3   | 14.1029 | 4.7290 | 1.1816 H     | 6 SER261 | 0.0352  |
| 96 OG    | 13.7137 | 4.8496 | -0.8235 O.3  | 6 SER261 | -0.6546 |
| 97 HG    | 13.0309 | 4.5628 | -1.4344 H    | 6 SER261 | 0.4275  |
| 98 N     | 11.1394 | 6.8260 | -0.4911 N.am | 7 MET262 | -0.4157 |
| BACKBONE |         |        |              |          |         |
| 99 H     | 10.6134 | 6.0933 | -0.9456 H    | 7 MET262 | 0.2719  |
| 100 CA   | 10.9885 | 8.1923 | -0.9646 C.3  | 7 MET262 | -0.0237 |
| BACKBONE |         |        |              |          |         |
| 101 HA   | 11.7148 | 8.8132 | -0.4401 H    | 7 MET262 | 0.0880  |
| 102 C    | 9.6016  | 8.7667 | -0.6376 C.2  | 7 MET262 | 0.5973  |
| BACKBONE |         |        |              |          |         |
| 103 O    | 9.2073  | 9.7906 | -1.1885 O.2  | 7 MET262 | -0.5679 |
| BACKBONE |         |        |              |          |         |
| 104 CB   | 11.2723 | 8.2554 | -2.4717 C.3  | 7 MET262 | 0.0342  |
| 105 HB2  | 10.8918 | 9.2041 | -2.8502 H    | 7 MET262 | 0.0241  |
| 106 HB3  | 10.7420 | 7.4334 | -2.9525 H    | 7 MET262 | 0.0241  |
| 107 CG   | 12.7558 | 8.1515 | -2.8453 C.3  | 7 MET262 | 0.0018  |
| 108 HG2  | 12.8324 | 7.9804 | -3.9190 H    | 7 MET262 | 0.0440  |
| 109 HG3  | 13.1902 | 7.3067 | -2.3108 H    | 7 MET262 | 0.0440  |
| 110 SD   | 13.6938 | 9.6393 | -2.4306 S.3  | 7 MET262 | -0.2737 |
| 111 CE   | 14.6453 | 9.0852 | -1.0172 C.3  | 7 MET262 | -0.0536 |
| 112 HE1  | 15.2704 | 9.9024 | -0.6570 H    | 7 MET262 | 0.0684  |
| 113 HE2  | 15.2770 | 8.2467 | -1.3105 H    | 7 MET262 | 0.0684  |
| 114 HE3  | 13.9675 | 8.7694 | -0.2241 H    | 7 MET262 | 0.0684  |
| 115 N    | 8.8778  | 8.1134 | 0.2737 N.am  | 8 ALA263 | -0.4157 |
| BACKBONE |         |        |              |          |         |
| 116 H    | 9.2613  | 7.2841 | 0.7042 H     | 8 ALA263 | 0.2719  |

|          |         |         |         |       |    |        |         |
|----------|---------|---------|---------|-------|----|--------|---------|
| 117 CA   | 7.5399  | 8.5686  | 0.6660  | C.3   | 8  | ALA263 | 0.0337  |
| BACKBONE |         |         |         |       |    |        |         |
| 118 HA   | 6.9897  | 8.7381  | -0.2595 | H     | 8  | ALA263 | 0.0823  |
| 119 C    | 7.5615  | 9.8953  | 1.4145  | C.2   | 8  | ALA263 | 0.5973  |
| BACKBONE |         |         |         |       |    |        |         |
| 120 O    | 6.6315  | 10.6916 | 1.2919  | O.2   | 8  | ALA263 | -0.5679 |
| BACKBONE |         |         |         |       |    |        |         |
| 121 CB   | 6.8096  | 7.4972  | 1.4828  | C.3   | 8  | ALA263 | -0.1825 |
| 122 HB1  | 7.3500  | 7.3177  | 2.4122  | H     | 8  | ALA263 | 0.0603  |
| 123 HB2  | 6.7597  | 6.5728  | 0.9073  | H     | 8  | ALA263 | 0.0603  |
| 124 HB3  | 5.7997  | 7.8389  | 1.7098  | H     | 8  | ALA263 | 0.0603  |
| 125 N    | 8.6279  | 10.1320 | 2.1739  | N.am  | 9  | ASP264 | -0.5163 |
| BACKBONE |         |         |         |       |    |        |         |
| 126 H    | 9.3555  | 9.4332  | 2.2226  | H     | 9  | ASP264 | 0.2936  |
| 127 CA   | 8.7850  | 11.3685 | 2.9414  | C.3   | 9  | ASP264 | 0.0381  |
| BACKBONE |         |         |         |       |    |        |         |
| 128 HA   | 7.7908  | 11.6511 | 3.2874  | H     | 9  | ASP264 | 0.0880  |
| 129 C    | 9.3467  | 12.4930 | 2.0842  | C.2   | 9  | ASP264 | 0.5366  |
| BACKBONE |         |         |         |       |    |        |         |
| 130 O    | 10.3692 | 12.3231 | 1.4154  | O.2   | 9  | ASP264 | -0.5819 |
| BACKBONE |         |         |         |       |    |        |         |
| 131 CB   | 9.7048  | 11.1547 | 4.1498  | C.3   | 9  | ASP264 | -0.0303 |
| 132 HB2  | 9.9371  | 12.1260 | 4.5865  | H     | 9  | ASP264 | -0.0122 |
| 133 HB3  | 10.6248 | 10.6809 | 3.8074  | H     | 9  | ASP264 | -0.0122 |
| 134 CG   | 9.0788  | 10.2804 | 5.2189  | C.2   | 9  | ASP264 | 0.7994  |
| 135 OD1  | 7.8382  | 10.1066 | 5.2178  | O.co2 | 9  | ASP264 | -0.8014 |
| 136 OD2  | 9.8389  | 9.7748  | 6.0712  | O.co2 | 9  | ASP264 | -0.8014 |
| 137 N    | 8.6745  | 13.6399 | 2.1284  | N.am  | 10 | TYR265 | -0.4157 |
| BACKBONE |         |         |         |       |    |        |         |
| 138 H    | 7.8218  | 13.6739 | 2.6688  | H     | 10 | TYR265 | 0.2719  |
| 139 CA   | 9.1072  | 14.8617 | 1.4320  | C.3   | 10 | TYR265 | -0.0014 |
| BACKBONE |         |         |         |       |    |        |         |
| 140 HA   | 9.0172  | 14.6627 | 0.3641  | H     | 10 | TYR265 | 0.0876  |
| 141 C    | 10.5738 | 15.2136 | 1.7021  | C.2   | 10 | TYR265 | 0.5973  |
| BACKBONE |         |         |         |       |    |        |         |
| 142 O    | 11.3083 | 15.5788 | 0.7790  | O.2   | 10 | TYR265 | -0.5679 |
| BACKBONE |         |         |         |       |    |        |         |
| 143 CB   | 8.2047  | 16.0435 | 1.8211  | C.3   | 10 | TYR265 | -0.0152 |
| 144 HB2  | 7.2250  | 15.8840 | 1.3706  | H     | 10 | TYR265 | 0.0295  |
| 145 HB3  | 8.1082  | 16.0528 | 2.9067  | H     | 10 | TYR265 | 0.0295  |
| 146 CG   | 8.7110  | 17.4083 | 1.3800  | C.ar  | 10 | TYR265 | -0.0011 |
| 147 CD1  | 8.5093  | 17.8654 | 0.0750  | C.ar  | 10 | TYR265 | -0.1906 |
| 148 HD1  | 7.9818  | 17.2419 | -0.6317 | H     | 10 | TYR265 | 0.1699  |
| 149 CD2  | 9.3972  | 18.2377 | 2.2718  | C.ar  | 10 | TYR265 | -0.1906 |
| 150 HD2  | 9.5612  | 17.9031 | 3.2855  | H     | 10 | TYR265 | 0.1699  |
| 151 CE1  | 8.9841  | 19.1282 | -0.3323 | C.ar  | 10 | TYR265 | -0.2341 |
| 152 HE1  | 8.8301  | 19.4689 | -1.3456 | H     | 10 | TYR265 | 0.1656  |
| 153 CE2  | 9.8746  | 19.4881 | 1.8801  | C.ar  | 10 | TYR265 | -0.2341 |
| 154 HE2  | 10.4134 | 20.1067 | 2.5826  | H     | 10 | TYR265 | 0.1656  |
| 155 CZ   | 9.6557  | 19.9335 | 0.5885  | C.ar  | 10 | TYR265 | 0.3226  |
| 156 OH   | 10.1302 | 21.1700 | 0.2157  | O.3   | 10 | TYR265 | -0.5579 |
| 157 HH   | 10.5955 | 21.6506 | 0.9043  | H     | 10 | TYR265 | 0.3992  |

|          |         |         |         |       |    |        |         |
|----------|---------|---------|---------|-------|----|--------|---------|
| 158 N    | 10.9904 | 15.1212 | 2.9649  | N.am  | 11 | GLU266 | -0.5163 |
| BACKBONE |         |         |         |       |    |        |         |
| 159 H    | 10.3512 | 14.7940 | 3.6751  | H     | 11 | GLU266 | 0.2936  |
| 160 CA   | 12.3627 | 15.4867 | 3.3427  | C.3   | 11 | GLU266 | 0.0397  |
| BACKBONE |         |         |         |       |    |        |         |
| 161 HA   | 12.5375 | 16.4978 | 2.9752  | H     | 11 | GLU266 | 0.1105  |
| 162 C    | 13.4009 | 14.5788 | 2.6777  | C.2   | 11 | GLU266 | 0.5366  |
| BACKBONE |         |         |         |       |    |        |         |
| 163 O    | 14.4579 | 15.0435 | 2.2487  | O.2   | 11 | GLU266 | -0.5819 |
| BACKBONE |         |         |         |       |    |        |         |
| 164 CB   | 12.5339 | 15.5014 | 4.8643  | C.3   | 11 | GLU266 | 0.0560  |
| 165 HB2  | 12.1618 | 14.5560 | 5.2589  | H     | 11 | GLU266 | -0.0173 |
| 166 HB3  | 13.5967 | 15.5951 | 5.0873  | H     | 11 | GLU266 | -0.0173 |
| 167 CG   | 11.7912 | 16.6440 | 5.5727  | C.3   | 11 | GLU266 | 0.0136  |
| 168 HG2  | 11.8894 | 17.5434 | 4.9647  | H     | 11 | GLU266 | -0.0425 |
| 169 HG3  | 12.2622 | 16.8076 | 6.5421  | H     | 11 | GLU266 | -0.0425 |
| 170 CD   | 10.2976 | 16.3810 | 5.8030  | C.2   | 11 | GLU266 | 0.8054  |
| 171 OE1  | 9.8163  | 15.2430 | 5.5654  | O.co2 | 11 | GLU266 | -0.8188 |
| 172 OE2  | 9.5990  | 17.3252 | 6.2379  | O.co2 | 11 | GLU266 | -0.8188 |
| 173 N    | 13.0802 | 13.2888 | 2.5869  | N.am  | 12 | ALA267 | -0.4157 |
| BACKBONE |         |         |         |       |    |        |         |
| 174 H    | 12.2203 | 12.9696 | 3.0098  | H     | 12 | ALA267 | 0.2719  |
| 175 CA   | 13.9309 | 12.3172 | 1.8951  | C.3   | 12 | ALA267 | 0.0337  |
| BACKBONE |         |         |         |       |    |        |         |
| 176 HA   | 14.9248 | 12.3725 | 2.3393  | H     | 12 | ALA267 | 0.0823  |
| 177 C    | 14.0759 | 12.6500 | 0.4119  | C.2   | 12 | ALA267 | 0.5973  |
| BACKBONE |         |         |         |       |    |        |         |
| 178 O    | 15.1694 | 12.5557 | -0.1413 | O.2   | 12 | ALA267 | -0.5679 |
| BACKBONE |         |         |         |       |    |        |         |
| 179 CB   | 13.3940 | 10.9009 | 2.0857  | C.3   | 12 | ALA267 | -0.1825 |
| 180 HB1  | 12.3991 | 10.8274 | 1.6466  | H     | 12 | ALA267 | 0.0603  |
| 181 HB2  | 13.3391 | 10.6734 | 3.1503  | H     | 12 | ALA267 | 0.0603  |
| 182 HB3  | 14.0605 | 10.1908 | 1.5962  | H     | 12 | ALA267 | 0.0603  |
| 183 N    | 12.9770 | 13.0601 | -0.2233 | N.am  | 13 | ARG268 | -0.3479 |
| BACKBONE |         |         |         |       |    |        |         |
| 184 H    | 12.1023 | 13.1090 | 0.2795  | H     | 13 | ARG268 | 0.2747  |
| 185 CA   | 13.0165 | 13.4406 | -1.6358 | C.3   | 13 | ARG268 | -0.2637 |
| BACKBONE |         |         |         |       |    |        |         |
| 186 HA   | 13.4515 | 12.6150 | -2.1991 | H     | 13 | ARG268 | 0.1560  |
| 187 C    | 13.8949 | 14.6715 | -1.8337 | C.2   | 13 | ARG268 | 0.7341  |
| BACKBONE |         |         |         |       |    |        |         |
| 188 O    | 14.6837 | 14.7353 | -2.7792 | O.2   | 13 | ARG268 | -0.5894 |
| BACKBONE |         |         |         |       |    |        |         |
| 189 CB   | 11.6055 | 13.6867 | -2.1754 | C.3   | 13 | ARG268 | -0.0007 |
| 190 HB2  | 11.1498 | 14.4879 | -1.5938 | H     | 13 | ARG268 | 0.0327  |
| 191 HB3  | 11.6848 | 13.9945 | -3.2180 | H     | 13 | ARG268 | 0.0327  |
| 192 CG   | 10.6965 | 12.4610 | -2.1025 | C.3   | 13 | ARG268 | 0.0390  |
| 193 HG2  | 10.3448 | 12.3431 | -1.0775 | H     | 13 | ARG268 | 0.0285  |
| 194 HG3  | 11.2682 | 11.5800 | -2.3941 | H     | 13 | ARG268 | 0.0285  |
| 195 CD   | 9.4832  | 12.5950 | -3.0311 | C.3   | 13 | ARG268 | 0.0486  |
| 196 HD2  | 8.9789  | 11.6299 | -3.0801 | H     | 13 | ARG268 | 0.0687  |
| 197 HD3  | 9.8384  | 12.8701 | -4.0242 | H     | 13 | ARG268 | 0.0687  |

|          |      |         |         |         |       |    |        |         |
|----------|------|---------|---------|---------|-------|----|--------|---------|
| 198      | NE   | 8.5132  | 13.6025 | -2.5906 | N.pl3 | 13 | ARG268 | -0.5295 |
| 199      | HE   | 8.5659  | 14.5189 | -3.0119 | H     | 13 | ARG268 | 0.3456  |
| 200      | CZ   | 7.5676  | 13.3969 | -1.6754 | C.cat | 13 | ARG268 | 0.8076  |
| 201      | NH1  | 7.4643  | 12.2239 | -1.0583 | N.pl3 | 13 | ARG268 | -0.8627 |
| 202      | HH12 | 8.0997  | 11.4737 | -1.2899 | H     | 13 | ARG268 | 0.4478  |
| 203      | HH11 | 6.7503  | 12.0829 | -0.3579 | H     | 13 | ARG268 | 0.4478  |
| 204      | NH2  | 6.7268  | 14.3758 | -1.3628 | N.pl3 | 13 | ARG268 | -0.8627 |
| 205      | HH21 | 6.8051  | 15.2737 | -1.8187 | H     | 13 | ARG268 | 0.4478  |
| 206      | HH22 | 6.0088  | 14.2226 | -0.6692 | H     | 13 | ARG268 | 0.4478  |
| 207      | N    | 13.7640 | 15.6378 | -0.9260 | N.am  | 14 | ILE269 | -0.4157 |
| BACKBONE |      |         |         |         |       |    |        |         |
| 208      | H    | 13.0965 | 15.5170 | -0.1778 | H     | 14 | ILE269 | 0.2719  |
| 209      | CA   | 14.5546 | 16.8683 | -0.9764 | C.3   | 14 | ILE269 | -0.0597 |
| BACKBONE |      |         |         |         |       |    |        |         |
| 210      | HA   | 14.3069 | 17.3607 | -1.9167 | H     | 14 | ILE269 | 0.0869  |
| 211      | C    | 16.0528 | 16.5835 | -0.9818 | C.2   | 14 | ILE269 | 0.5973  |
| BACKBONE |      |         |         |         |       |    |        |         |
| 212      | O    | 16.7998 | 17.1958 | -1.7527 | O.2   | 14 | ILE269 | -0.5679 |
| BACKBONE |      |         |         |         |       |    |        |         |
| 213      | CB   | 14.1873 | 17.8288 | 0.1839  | C.3   | 14 | ILE269 | 0.1303  |
| 214      | HB   | 14.0907 | 17.2391 | 1.0955  | H     | 14 | ILE269 | 0.0187  |
| 215      | CG1  | 12.8403 | 18.5115 | -0.0905 | C.3   | 14 | ILE269 | -0.0430 |
| 216      | HG12 | 12.1184 | 17.7404 | -0.3595 | H     | 14 | ILE269 | 0.0236  |
| 217      | HG13 | 12.5186 | 19.0064 | 0.8259  | H     | 14 | ILE269 | 0.0236  |
| 218      | CG2  | 15.2962 | 18.8629 | 0.4232  | C.3   | 14 | ILE269 | -0.3204 |
| 219      | HG21 | 15.4222 | 19.4740 | -0.4706 | H     | 14 | ILE269 | 0.0882  |
| 220      | HG22 | 16.2308 | 18.3483 | 0.6462  | H     | 14 | ILE269 | 0.0882  |
| 221      | HG23 | 15.0230 | 19.5007 | 1.2638  | H     | 14 | ILE269 | 0.0882  |
| 222      | CD1  | 12.8628 | 19.5578 | -1.2154 | C.3   | 14 | ILE269 | -0.0660 |
| 223      | HD11 | 13.1823 | 19.0856 | -2.1444 | H     | 14 | ILE269 | 0.0186  |
| 224      | HD12 | 13.5583 | 20.3558 | -0.9555 | H     | 14 | ILE269 | 0.0186  |
| 225      | HD13 | 11.8639 | 19.9743 | -1.3444 | H     | 14 | ILE269 | 0.0186  |
| 226      | N    | 16.4767 | 15.6401 | -0.1386 | N.am  | 15 | PHE270 | -0.4157 |
| BACKBONE |      |         |         |         |       |    |        |         |
| 227      | H    | 15.8018 | 15.1849 | 0.4592  | H     | 15 | PHE270 | 0.2719  |
| 228      | CA   | 17.8862 | 15.2378 | -0.0457 | C.3   | 15 | PHE270 | -0.0024 |
| BACKBONE |      |         |         |         |       |    |        |         |
| 229      | HA   | 18.4213 | 16.1573 | 0.1915  | H     | 15 | PHE270 | 0.0978  |
| 230      | C    | 18.4932 | 14.7205 | -1.3490 | C.2   | 15 | PHE270 | 0.5973  |
| BACKBONE |      |         |         |         |       |    |        |         |
| 231      | O    | 19.7029 | 14.8509 | -1.5587 | O.2   | 15 | PHE270 | -0.5679 |
| BACKBONE |      |         |         |         |       |    |        |         |
| 232      | CB   | 18.0875 | 14.2018 | 1.0657  | C.3   | 15 | PHE270 | -0.0343 |
| 233      | HB2  | 17.2425 | 13.5135 | 1.0503  | H     | 15 | PHE270 | 0.0295  |
| 234      | HB3  | 19.0068 | 13.6532 | 0.8609  | H     | 15 | PHE270 | 0.0295  |
| 235      | CG   | 18.1885 | 14.7989 | 2.4476  | C.ar  | 15 | PHE270 | 0.0118  |
| 236      | CD1  | 19.1286 | 15.7927 | 2.7295  | C.ar  | 15 | PHE270 | -0.1256 |
| 237      | HD1  | 19.7853 | 16.1426 | 1.9469  | H     | 15 | PHE270 | 0.1330  |
| 238      | CD2  | 17.3609 | 14.3488 | 3.4711  | C.ar  | 15 | PHE270 | -0.1256 |
| 239      | HD2  | 16.6377 | 13.5727 | 3.2687  | H     | 15 | PHE270 | 0.1330  |
| 240      | CE1  | 19.2299 | 16.3386 | 4.0076  | C.ar  | 15 | PHE270 | -0.1704 |
| 241      | HE1  | 19.9576 | 17.1104 | 4.2105  | H     | 15 | PHE270 | 0.1430  |

|          |      |         |         |         |      |    |        |         |
|----------|------|---------|---------|---------|------|----|--------|---------|
| 242      | CE2  | 17.4524 | 14.8870 | 4.7578  | C.ar | 15 | PHE270 | -0.1704 |
| 243      | HE2  | 16.8008 | 14.5312 | 5.5422  | H    | 15 | PHE270 | 0.1430  |
| 244      | CZ   | 18.3891 | 15.8856 | 5.0242  | C.ar | 15 | PHE270 | -0.1072 |
| 245      | HZ   | 18.4632 | 16.3072 | 6.0157  | H    | 15 | PHE270 | 0.1297  |
| 246      | N    | 17.6641 | 14.1433 | -2.2209 | N.am | 16 | THR271 | -0.4157 |
| BACKBONE |      |         |         |         |      |    |        |         |
| 247      | H    | 16.6743 | 14.1199 | -2.0213 | H    | 16 | THR271 | 0.2719  |
| 248      | CA   | 18.1616 | 13.5412 | -3.4654 | C.3  | 16 | THR271 | -0.0389 |
| BACKBONE |      |         |         |         |      |    |        |         |
| 249      | HA   | 19.0048 | 12.9309 | -3.1419 | H    | 16 | THR271 | 0.1007  |
| 250      | C    | 18.6545 | 14.5720 | -4.4787 | C.2  | 16 | THR271 | 0.5973  |
| BACKBONE |      |         |         |         |      |    |        |         |
| 251      | O    | 19.5097 | 14.2746 | -5.3109 | O.2  | 16 | THR271 | -0.5679 |
| BACKBONE |      |         |         |         |      |    |        |         |
| 252      | CB   | 17.1125 | 12.6360 | -4.1618 | C.3  | 16 | THR271 | 0.3654  |
| 253      | HB   | 17.5904 | 12.1637 | -5.0201 | H    | 16 | THR271 | 0.0043  |
| 254      | OG1  | 16.0044 | 13.4251 | -4.6190 | O.3  | 16 | THR271 | -0.6761 |
| 255      | HG1  | 15.6149 | 13.8506 | -3.8516 | H    | 16 | THR271 | 0.4102  |
| 256      | CG2  | 16.6286 | 11.5294 | -3.2297 | C.3  | 16 | THR271 | -0.2438 |
| 257      | HG21 | 16.1449 | 11.9731 | -2.3595 | H    | 16 | THR271 | 0.0642  |
| 258      | HG22 | 17.4789 | 10.9292 | -2.9061 | H    | 16 | THR271 | 0.0642  |
| 259      | HG23 | 15.9163 | 10.8954 | -3.7575 | H    | 16 | THR271 | 0.0642  |
| 260      | N    | 18.1128 | 15.7816 | -4.4012 | N.am | 17 | PHE272 | -0.4157 |
| BACKBONE |      |         |         |         |      |    |        |         |
| 261      | H    | 17.4977 | 16.0003 | -3.6306 | H    | 17 | PHE272 | 0.2719  |
| 262      | CA   | 18.3891 | 16.8017 | -5.4081 | C.3  | 17 | PHE272 | -0.0024 |
| BACKBONE |      |         |         |         |      |    |        |         |
| 263      | HA   | 18.3381 | 16.3076 | -6.3782 | H    | 17 | PHE272 | 0.0978  |
| 264      | C    | 19.8001 | 17.3779 | -5.3258 | C.2  | 17 | PHE272 | 0.5973  |
| BACKBONE |      |         |         |         |      |    |        |         |
| 265      | O    | 20.4606 | 17.5375 | -6.3553 | O.2  | 17 | PHE272 | -0.5679 |
| BACKBONE |      |         |         |         |      |    |        |         |
| 266      | CB   | 17.3292 | 17.8997 | -5.3515 | C.3  | 17 | PHE272 | -0.0343 |
| 267      | HB2  | 17.2187 | 18.2205 | -4.3156 | H    | 17 | PHE272 | 0.0295  |
| 268      | HB3  | 17.6688 | 18.7395 | -5.9577 | H    | 17 | PHE272 | 0.0295  |
| 269      | CG   | 15.9895 | 17.4593 | -5.8579 | C.ar | 17 | PHE272 | 0.0118  |
| 270      | CD1  | 15.0848 | 16.8220 | -5.0115 | C.ar | 17 | PHE272 | -0.1256 |
| 271      | HD1  | 15.3494 | 16.6522 | -3.9782 | H    | 17 | PHE272 | 0.1330  |
| 272      | CD2  | 15.6255 | 17.6852 | -7.1824 | C.ar | 17 | PHE272 | -0.1256 |
| 273      | HD2  | 16.3141 | 18.1859 | -7.8469 | H    | 17 | PHE272 | 0.1330  |
| 274      | CE1  | 13.8468 | 16.4025 | -5.4805 | C.ar | 17 | PHE272 | -0.1704 |
| 275      | HE1  | 13.1587 | 15.8982 | -4.8183 | H    | 17 | PHE272 | 0.1430  |
| 276      | CE2  | 14.3886 | 17.2749 | -7.6590 | C.ar | 17 | PHE272 | -0.1704 |
| 277      | HE2  | 14.1199 | 17.4528 | -8.6898 | H    | 17 | PHE272 | 0.1430  |
| 278      | CZ   | 13.4963 | 16.6347 | -6.8078 | C.ar | 17 | PHE272 | -0.1072 |
| 279      | HZ   | 12.5315 | 16.3175 | -7.1755 | H    | 17 | PHE272 | 0.1297  |
| 280      | N    | 20.2653 | 17.6603 | -4.1082 | N.am | 18 | GLY273 | -0.4157 |
| BACKBONE |      |         |         |         |      |    |        |         |
| 281      | H    | 19.6928 | 17.4494 | -3.3033 | H    | 18 | GLY273 | 0.2719  |
| 282      | CA   | 21.5825 | 18.2675 | -3.9045 | C.3  | 18 | GLY273 | -0.0252 |
| BACKBONE |      |         |         |         |      |    |        |         |
| 283      | HA2  | 21.7477 | 18.4080 | -2.8362 | H    | 18 | GLY273 | 0.0698  |

|          |         |         |                |           |         |
|----------|---------|---------|----------------|-----------|---------|
| 284 HA3  | 22.3467 | 17.6020 | -4.3059 H      | 18 GLY273 | 0.0698  |
| 285 C    | 21.6814 | 19.6129 | -4.6021 C.2    | 18 GLY273 | 0.5973  |
| BACKBONE |         |         |                |           |         |
| 286 O    | 20.7486 | 20.4162 | -4.5375 O.2    | 18 GLY273 | -0.5679 |
| BACKBONE |         |         |                |           |         |
| 287 N    | 22.8062 | 19.8520 | -5.2746 N.am   | 19 THR274 | -0.4157 |
| BACKBONE |         |         |                |           |         |
| 288 H    | 23.5501 | 19.1696 | -5.2395 H      | 19 THR274 | 0.2719  |
| 289 CA   | 23.0006 | 21.0697 | -6.0625 C.3    | 19 THR274 | -0.0389 |
| BACKBONE |         |         |                |           |         |
| 290 HA   | 22.6648 | 21.9176 | -5.4655 H      | 19 THR274 | 0.1007  |
| 291 C    | 22.1834 | 20.9701 | -7.3495 C.2    | 19 THR274 | 0.5973  |
| BACKBONE |         |         |                |           |         |
| 292 O    | 22.5439 | 20.2266 | -8.2667 O.2    | 19 THR274 | -0.5679 |
| BACKBONE |         |         |                |           |         |
| 293 CB   | 24.4954 | 21.3040 | -6.4062 C.3    | 19 THR274 | 0.3654  |
| 294 HB   | 24.7913 | 20.5759 | -7.1615 H      | 19 THR274 | 0.0043  |
| 295 OG1  | 25.2993 | 21.1328 | -5.2300 O.3    | 19 THR274 | -0.6761 |
| 296 HG1  | 26.2140 | 21.2847 | -5.4789 H      | 19 THR274 | 0.4102  |
| 297 CG2  | 24.7085 | 22.7104 | -6.9690 C.3    | 19 THR274 | -0.2438 |
| 298 HG21 | 24.4159 | 23.4486 | -6.2224 H      | 19 THR274 | 0.0642  |
| 299 HG22 | 24.1011 | 22.8392 | -7.8648 H      | 19 THR274 | 0.0642  |
| 300 HG23 | 25.7604 | 22.8454 | -7.2207 H      | 19 THR274 | 0.0642  |
| 301 N    | 21.0829 | 21.7153 | -7.4053 N.am   | 20 TRP275 | -0.4157 |
| BACKBONE |         |         |                |           |         |
| 302 H    | 20.8996 | 22.3761 | -6.6638 H      | 20 TRP275 | 0.2719  |
| 303 CA   | 20.1287 | 21.6046 | -8.5126 C.3    | 20 TRP275 | -0.0275 |
| BACKBONE |         |         |                |           |         |
| 304 HA   | 20.3426 | 20.6806 | -9.0499 H      | 20 TRP275 | 0.1123  |
| 305 C    | 20.2867 | 22.7473 | -9.5130 C.2    | 20 TRP275 | 0.5973  |
| BACKBONE |         |         |                |           |         |
| 306 O    | 19.9565 | 23.9039 | -9.2247 O.2    | 20 TRP275 | -0.5679 |
| BACKBONE |         |         |                |           |         |
| 307 CB   | 18.6960 | 21.5354 | -7.9722 C.3    | 20 TRP275 | -0.0050 |
| 308 HB2  | 18.6940 | 20.8858 | -7.0970 H      | 20 TRP275 | 0.0339  |
| 309 HB3  | 18.3945 | 22.5410 | -7.6790 H      | 20 TRP275 | 0.0339  |
| 310 CG   | 17.6817 | 21.0080 | -8.9501 C.2    | 20 TRP275 | -0.1415 |
| 311 CD1  | 16.6384 | 21.7012 | -9.5007 C.2    | 20 TRP275 | -0.1638 |
| 312 HD1  | 16.4104 | 22.7374 | -9.2990 H      | 20 TRP275 | 0.2062  |
| 313 CD2  | 17.6036 | 19.6767 | -9.4825 C.ar   | 20 TRP275 | 0.1243  |
| 314 NE1  | 15.9214 | 20.8883 | -10.3486 N.pl3 | 20 TRP275 | -0.3418 |
| 315 HE1  | 15.1093 | 21.1666 | -10.8805 H     | 20 TRP275 | 0.3412  |
| 316 CE2  | 16.4875 | 19.6398 | -10.3545 C.ar  | 20 TRP275 | 0.1380  |
| 317 CE3  | 18.3636 | 18.5111 | -9.3071 C.ar   | 20 TRP275 | -0.2387 |
| 318 HE3  | 19.2187 | 18.5053 | -8.6475 H      | 20 TRP275 | 0.1700  |
| 319 CZ2  | 16.1121 | 18.4810 | -11.0486 C.ar  | 20 TRP275 | -0.2601 |
| 320 HZ2  | 15.2568 | 18.4752 | -11.7080 H     | 20 TRP275 | 0.1572  |
| 321 CZ3  | 17.9926 | 17.3579 | -10.0026 C.ar  | 20 TRP275 | -0.1972 |
| 322 HZ3  | 18.5730 | 16.4550 | -9.8827 H      | 20 TRP275 | 0.1447  |
| 323 CH2  | 16.8726 | 17.3541 | -10.8584 C.ar  | 20 TRP275 | -0.1134 |
| 324 HH2  | 16.6068 | 16.4443 | -11.3762 H     | 20 TRP275 | 0.1417  |

|          |         |         |          |      |    |        |         |
|----------|---------|---------|----------|------|----|--------|---------|
| 325 N    | 20.7913 | 22.4042 | -10.6930 | N.am | 21 | ILE276 | -0.4157 |
| BACKBONE |         |         |          |      |    |        |         |
| 326 H    | 20.9383 | 21.4251 | -10.8926 | H    | 21 | ILE276 | 0.2719  |
| 327 CA   | 21.1420 | 23.3911 | -11.7140 | C.3  | 21 | ILE276 | -0.0597 |
| BACKBONE |         |         |          |      |    |        |         |
| 328 HA   | 21.0805 | 24.3772 | -11.2537 | H    | 21 | ILE276 | 0.0869  |
| 329 C    | 20.1431 | 23.3719 | -12.8812 | C.2  | 21 | ILE276 | 0.5973  |
| BACKBONE |         |         |          |      |    |        |         |
| 330 O    | 20.4884 | 23.7000 | -14.0222 | O.2  | 21 | ILE276 | -0.5679 |
| BACKBONE |         |         |          |      |    |        |         |
| 331 CB   | 22.6106 | 23.1987 | -12.2083 | C.3  | 21 | ILE276 | 0.1303  |
| 332 HB   | 22.7917 | 23.9141 | -13.0105 | H    | 21 | ILE276 | 0.0187  |
| 333 CG1  | 22.8269 | 21.7877 | -12.7750 | C.3  | 21 | ILE276 | -0.0430 |
| 334 HG12 | 22.9679 | 21.1030 | -11.9386 | H    | 21 | ILE276 | 0.0236  |
| 335 HG13 | 21.9333 | 21.5034 | -13.3305 | H    | 21 | ILE276 | 0.0236  |
| 336 CG2  | 23.5955 | 23.4715 | -11.0688 | C.3  | 21 | ILE276 | -0.3204 |
| 337 HG21 | 23.4223 | 22.7606 | -10.2609 | H    | 21 | ILE276 | 0.0882  |
| 338 HG22 | 23.4497 | 24.4859 | -10.6976 | H    | 21 | ILE276 | 0.0882  |
| 339 HG23 | 24.6159 | 23.3623 | -11.4364 | H    | 21 | ILE276 | 0.0882  |
| 340 CD1  | 24.0301 | 21.6561 | -13.7072 | C.3  | 21 | ILE276 | -0.0660 |
| 341 HD11 | 24.9371 | 21.9360 | -13.1714 | H    | 21 | ILE276 | 0.0186  |
| 342 HD12 | 23.8978 | 22.3139 | -14.5662 | H    | 21 | ILE276 | 0.0186  |
| 343 HD13 | 24.1137 | 20.6245 | -14.0490 | H    | 21 | ILE276 | 0.0186  |
| 344 N    | 18.8974 | 23.0076 | -12.5782 | N.am | 22 | TYR277 | -0.4157 |
| BACKBONE |         |         |          |      |    |        |         |
| 345 H    | 18.6419 | 22.8788 | -11.6097 | H    | 22 | TYR277 | 0.2719  |
| 346 CA   | 17.8906 | 22.7900 | -13.6206 | C.3  | 22 | TYR277 | -0.0014 |
| BACKBONE |         |         |          |      |    |        |         |
| 347 HA   | 18.3362 | 23.1116 | -14.5619 | H    | 22 | TYR277 | 0.0876  |
| 348 C    | 16.6521 | 23.6763 | -13.5033 | C.2  | 22 | TYR277 | 0.5973  |
| BACKBONE |         |         |          |      |    |        |         |
| 349 O    | 16.5084 | 24.4211 | -12.5391 | O.2  | 22 | TYR277 | -0.5679 |
| BACKBONE |         |         |          |      |    |        |         |
| 350 CB   | 17.5597 | 21.2976 | -13.7285 | C.3  | 22 | TYR277 | -0.0152 |
| 351 HB2  | 17.0700 | 20.9725 | -12.8106 | H    | 22 | TYR277 | 0.0295  |
| 352 HB3  | 16.8893 | 21.1401 | -14.5734 | H    | 22 | TYR277 | 0.0295  |
| 353 CG   | 18.8164 | 20.4845 | -13.9346 | C.ar | 22 | TYR277 | -0.0011 |
| 354 CD1  | 19.3722 | 19.7499 | -12.8877 | C.ar | 22 | TYR277 | -0.1906 |
| 355 HD1  | 18.8859 | 19.7458 | -11.9234 | H    | 22 | TYR277 | 0.1699  |
| 356 CD2  | 19.4813 | 20.4973 | -15.1619 | C.ar | 22 | TYR277 | -0.1906 |
| 357 HD2  | 19.0756 | 21.0748 | -15.9795 | H    | 22 | TYR277 | 0.1699  |
| 358 CE1  | 20.5425 | 19.0233 | -13.0673 | C.ar | 22 | TYR277 | -0.2341 |
| 359 HE1  | 20.9549 | 18.4466 | -12.2526 | H    | 22 | TYR277 | 0.1656  |
| 360 CE2  | 20.6570 | 19.7791 | -15.3496 | C.ar | 22 | TYR277 | -0.2341 |
| 361 HE2  | 21.1594 | 19.7948 | -16.3055 | H    | 22 | TYR277 | 0.1656  |
| 362 CZ   | 21.1767 | 19.0437 | -14.2984 | C.ar | 22 | TYR277 | 0.3226  |
| 363 OH   | 22.3403 | 18.3299 | -14.4758 | O.3  | 22 | TYR277 | -0.5579 |
| 364 HH   | 22.6402 | 17.8445 | -13.7037 | H    | 22 | TYR277 | 0.3992  |
| 365 N    | 15.7769 | 23.5878 | -14.5058 | N.am | 23 | SER278 | -0.4157 |
| BACKBONE |         |         |          |      |    |        |         |
| 366 H    | 15.7911 | 22.7588 | -15.0827 | H    | 23 | SER278 | 0.2719  |

|          |         |         |          |      |    |        |         |
|----------|---------|---------|----------|------|----|--------|---------|
| 367 CA   | 14.7949 | 24.6332 | -14.8133 | C.3  | 23 | SER278 | -0.0249 |
| BACKBONE |         |         |          |      |    |        |         |
| 368 HA   | 15.3681 | 25.5592 | -14.7698 | H    | 23 | SER278 | 0.0843  |
| 369 C    | 13.6683 | 24.8358 | -13.7994 | C.2  | 23 | SER278 | 0.5973  |
| BACKBONE |         |         |          |      |    |        |         |
| 370 O    | 13.1058 | 25.9268 | -13.7098 | O.2  | 23 | SER278 | -0.5679 |
| BACKBONE |         |         |          |      |    |        |         |
| 371 CB   | 14.1971 | 24.3909 | -16.2053 | C.3  | 23 | SER278 | 0.2117  |
| 372 HB2  | 13.5506 | 25.2284 | -16.4676 | H    | 23 | SER278 | 0.0352  |
| 373 HB3  | 13.6118 | 23.4716 | -16.1882 | H    | 23 | SER278 | 0.0352  |
| 374 OG   | 15.2210 | 24.2721 | -17.1767 | O.3  | 23 | SER278 | -0.6546 |
| 375 HG   | 14.7993 | 24.1223 | -18.0260 | H    | 23 | SER278 | 0.4275  |
| 376 N    | 13.3402 | 23.7754 | -13.0639 | N.am | 24 | VAL279 | -0.4157 |
| BACKBONE |         |         |          |      |    |        |         |
| 377 H    | 13.8351 | 22.9098 | -13.2251 | H    | 24 | VAL279 | 0.2719  |
| 378 CA   | 12.3015 | 23.7978 | -12.0356 | C.3  | 24 | VAL279 | -0.0875 |
| BACKBONE |         |         |          |      |    |        |         |
| 379 HA   | 11.8233 | 24.7768 | -12.0031 | H    | 24 | VAL279 | 0.0969  |
| 380 C    | 12.9712 | 23.4834 | -10.6997 | C.2  | 24 | VAL279 | 0.5973  |
| BACKBONE |         |         |          |      |    |        |         |
| 381 O    | 13.7035 | 22.5013 | -10.5980 | O.2  | 24 | VAL279 | -0.5679 |
| BACKBONE |         |         |          |      |    |        |         |
| 382 CB   | 11.1908 | 22.7517 | -12.3484 | C.3  | 24 | VAL279 | 0.2985  |
| 383 HB   | 11.6621 | 21.7699 | -12.3934 | H    | 24 | VAL279 | -0.0297 |
| 384 CG1  | 10.1315 | 22.7177 | -11.2456 | C.3  | 24 | VAL279 | -0.3192 |
| 385 HG11 | 9.6439  | 23.6904 | -11.1799 | H    | 24 | VAL279 | 0.0791  |
| 386 HG12 | 10.6063 | 22.4841 | -10.2927 | H    | 24 | VAL279 | 0.0791  |
| 387 HG13 | 9.3892  | 21.9542 | -11.4783 | H    | 24 | VAL279 | 0.0791  |
| 388 CG2  | 10.5409 | 23.0504 | -13.6950 | C.3  | 24 | VAL279 | -0.3192 |
| 389 HG21 | 10.0664 | 24.0311 | -13.6599 | H    | 24 | VAL279 | 0.0791  |
| 390 HG22 | 9.7897  | 22.2910 | -13.9124 | H    | 24 | VAL279 | 0.0791  |
| 391 HG23 | 11.3018 | 23.0425 | -14.4755 | H    | 24 | VAL279 | 0.0791  |
| 392 N    | 12.7437 | 24.3178 | -9.6854  | N.am | 25 | ASN280 | -0.4157 |
| BACKBONE |         |         |          |      |    |        |         |
| 393 H    | 12.0875 | 25.0773 | -9.7981  | H    | 25 | ASN280 | 0.2719  |
| 394 CA   | 13.4407 | 24.1400 | -8.4050  | C.3  | 25 | ASN280 | 0.0143  |
| BACKBONE |         |         |          |      |    |        |         |
| 395 HA   | 14.4769 | 23.9320 | -8.6717  | H    | 25 | ASN280 | 0.1048  |
| 396 C    | 12.9591 | 22.9247 | -7.6085  | C.2  | 25 | ASN280 | 0.5973  |
| BACKBONE |         |         |          |      |    |        |         |
| 397 O    | 11.8143 | 22.4775 | -7.7542  | O.2  | 25 | ASN280 | -0.5679 |
| BACKBONE |         |         |          |      |    |        |         |
| 398 CB   | 13.4374 | 25.4192 | -7.5510  | C.3  | 25 | ASN280 | -0.2041 |
| 399 HB2  | 13.8431 | 26.2362 | -8.1477  | H    | 25 | ASN280 | 0.0797  |
| 400 HB3  | 14.0711 | 25.2566 | -6.6792  | H    | 25 | ASN280 | 0.0797  |
| 401 CG   | 12.0521 | 25.8102 | -7.0751  | C.2  | 25 | ASN280 | 0.7130  |
| 402 ND2  | 11.7161 | 25.6457 | -5.9010  | N.am | 25 | ASN280 | -0.9191 |
| 403 HD22 | 12.3677 | 25.2471 | -5.2403  | H    | 25 | ASN280 | 0.4196  |
| 404 HD21 | 10.7889 | 25.9096 | -5.5994  | H    | 25 | ASN280 | 0.4196  |
| 405 OD1  | 11.2428 | 26.3269 | -7.9842  | O.2  | 25 | ASN280 | -0.5931 |
| 406 N    | 13.8563 | 22.3994 | -6.7772  | N.am | 26 | LYS281 | -0.3479 |
| BACKBONE |         |         |          |      |    |        |         |



|          |         |         |               |    |        |         |
|----------|---------|---------|---------------|----|--------|---------|
| 407 H    | 14.7088 | 22.9103 | -6.5971 H     | 26 | LYS281 | 0.2747  |
| 408 CA   | 13.6553 | 21.1093 | -6.1137 C.3   | 26 | LYS281 | -0.2400 |
| BACKBONE |         |         |               |    |        |         |
| 409 HA   | 13.4817 | 20.4086 | -6.9304 H     | 26 | LYS281 | 0.1426  |
| 410 C    | 12.4144 | 21.0134 | -5.2328 C.2   | 26 | LYS281 | 0.7341  |
| BACKBONE |         |         |               |    |        |         |
| 411 O    | 11.8008 | 19.9559 | -5.1577 O.2   | 26 | LYS281 | -0.5894 |
| BACKBONE |         |         |               |    |        |         |
| 412 CB   | 14.9008 | 20.7000 | -5.3212 C.3   | 26 | LYS281 | -0.0094 |
| 413 HB2  | 14.7206 | 19.7095 | -4.9033 H     | 26 | LYS281 | 0.0362  |
| 414 HB3  | 15.7392 | 20.6541 | -6.0162 H     | 26 | LYS281 | 0.0362  |
| 415 CG   | 15.2927 | 21.6263 | -4.1762 C.3   | 26 | LYS281 | 0.0187  |
| 416 HG2  | 15.5798 | 22.5982 | -4.5777 H     | 26 | LYS281 | 0.0103  |
| 417 HG3  | 14.4453 | 21.7478 | -3.5015 H     | 26 | LYS281 | 0.0103  |
| 418 CD   | 16.4596 | 21.0296 | -3.4176 C.3   | 26 | LYS281 | -0.0479 |
| 419 HD2  | 17.2694 | 20.8290 | -4.1192 H     | 26 | LYS281 | 0.0621  |
| 420 HD3  | 16.1386 | 20.0954 | -2.9568 H     | 26 | LYS281 | 0.0621  |
| 421 CE   | 16.9696 | 21.9587 | -2.3351 C.3   | 26 | LYS281 | -0.0143 |
| 422 HE2  | 16.3848 | 21.8174 | -1.4263 H     | 26 | LYS281 | 0.1135  |
| 423 HE3  | 16.8796 | 22.9927 | -2.6681 H     | 26 | LYS281 | 0.1135  |
| 424 NZ   | 18.4011 | 21.6434 | -2.0631 N.4   | 26 | LYS281 | -0.3854 |
| 425 HZ3  | 18.4823 | 20.6845 | -1.7562 H     | 26 | LYS281 | 0.3400  |
| 426 HZ1  | 18.7502 | 22.2584 | -1.3419 H     | 26 | LYS281 | 0.3400  |
| 427 HZ2  | 18.9408 | 21.7736 | -2.9069 H     | 26 | LYS281 | 0.3400  |
| 428 N    | 12.0555 | 22.1101 | -4.5651 N.am  | 27 | GLU282 | -0.5163 |
| BACKBONE |         |         |               |    |        |         |
| 429 H    | 12.5855 | 22.9612 | -4.6862 H     | 27 | GLU282 | 0.2936  |
| 430 CA   | 10.9082 | 22.1008 | -3.6614 C.3   | 27 | GLU282 | 0.0397  |
| BACKBONE |         |         |               |    |        |         |
| 431 HA   | 11.0399 | 21.2671 | -2.9716 H     | 27 | GLU282 | 0.1105  |
| 432 C    | 9.5975  | 21.8643 | -4.4139 C.2   | 27 | GLU282 | 0.5366  |
| BACKBONE |         |         |               |    |        |         |
| 433 O    | 8.7593  | 21.0835 | -3.9707 O.2   | 27 | GLU282 | -0.5819 |
| BACKBONE |         |         |               |    |        |         |
| 434 CB   | 10.8492 | 23.3901 | -2.8437 C.3   | 27 | GLU282 | 0.0560  |
| 435 HB2  | 10.8821 | 24.2336 | -3.5331 H     | 27 | GLU282 | -0.0173 |
| 436 HB3  | 9.9068  | 23.4047 | -2.2963 H     | 27 | GLU282 | -0.0173 |
| 437 CG   | 11.9932 | 23.5487 | -1.8351 C.3   | 27 | GLU282 | 0.0136  |
| 438 HG2  | 12.2510 | 22.5619 | -1.4505 H     | 27 | GLU282 | -0.0425 |
| 439 HG3  | 11.6442 | 24.1779 | -1.0165 H     | 27 | GLU282 | -0.0425 |
| 440 CD   | 13.2546 | 24.1805 | -2.4242 C.2   | 27 | GLU282 | 0.8054  |
| 441 OE1  | 13.2063 | 24.7406 | -3.5439 O.co2 | 27 | GLU282 | -0.8188 |
| 442 OE2  | 14.3062 | 24.1178 | -1.7509 O.co2 | 27 | GLU282 | -0.8188 |
| 443 N    | 9.4293  | 22.5323 | -5.5543 N.am  | 28 | GLN283 | -0.4157 |
| BACKBONE |         |         |               |    |        |         |
| 444 H    | 10.1322 | 23.1958 | -5.8468 H     | 28 | GLN283 | 0.2719  |
| 445 CA   | 8.2453  | 22.3244 | -6.3937 C.3   | 28 | GLN283 | -0.0031 |
| BACKBONE |         |         |               |    |        |         |
| 446 HA   | 7.3737  | 22.5285 | -5.7719 H     | 28 | GLN283 | 0.0850  |
| 447 C    | 8.1519  | 20.8812 | -6.8852 C.2   | 28 | GLN283 | 0.5973  |
| BACKBONE |         |         |               |    |        |         |

|          |         |         |              |           |         |
|----------|---------|---------|--------------|-----------|---------|
| 448 O    | 7.0716  | 20.2860 | -6.8687 O.2  | 28 GLN283 | -0.5679 |
| BACKBONE |         |         |              |           |         |
| 449 CB   | 8.2302  | 23.2908 | -7.5833 C.3  | 28 GLN283 | -0.0036 |
| 450 HB2  | 9.1610  | 23.1660 | -8.1365 H    | 28 GLN283 | 0.0171  |
| 451 HB3  | 7.3885  | 23.0296 | -8.2247 H    | 28 GLN283 | 0.0171  |
| 452 CG   | 8.0978  | 24.7612 | -7.1957 C.3  | 28 GLN283 | -0.0645 |
| 453 HG2  | 9.0382  | 25.0941 | -6.7562 H    | 28 GLN283 | 0.0352  |
| 454 HG3  | 7.2985  | 24.8597 | -6.4611 H    | 28 GLN283 | 0.0352  |
| 455 CD   | 7.7773  | 25.6419 | -8.3857 C.2  | 28 GLN283 | 0.6951  |
| 456 NE2  | 8.6129  | 26.4277 | -8.8343 N.am | 28 GLN283 | -0.9407 |
| 457 HE22 | 9.5239  | 26.4963 | -8.4037 H    | 28 GLN283 | 0.4251  |
| 458 HE21 | 8.3871  | 27.0035 | -9.6328 H    | 28 GLN283 | 0.4251  |
| 459 OE1  | 6.5659  | 25.5098 | -8.9105 O.2  | 28 GLN283 | -0.6086 |
| 460 N    | 9.2871  | 20.3121 | -7.2918 N.am | 29 LEU284 | -0.4157 |
| BACKBONE |         |         |              |           |         |
| 461 H    | 10.1440 | 20.8463 | -7.2678 H    | 29 LEU284 | 0.2719  |
| 462 CA   | 9.3180  | 18.9273 | -7.7731 C.3  | 29 LEU284 | -0.0518 |
| BACKBONE |         |         |              |           |         |
| 463 HA   | 8.5233  | 18.8109 | -8.5100 H    | 29 LEU284 | 0.0922  |
| 464 C    | 9.0445  | 17.9453 | -6.6343 C.2  | 29 LEU284 | 0.5973  |
| BACKBONE |         |         |              |           |         |
| 465 O    | 8.2114  | 17.0416 | -6.7722 O.2  | 29 LEU284 | -0.5679 |
| BACKBONE |         |         |              |           |         |
| 466 CB   | 10.6520 | 18.6127 | -8.4741 C.3  | 29 LEU284 | -0.1102 |
| 467 HB2  | 11.4622 | 18.9253 | -7.8153 H    | 29 LEU284 | 0.0457  |
| 468 HB3  | 10.7060 | 17.5353 | -8.6305 H    | 29 LEU284 | 0.0457  |
| 469 CG   | 10.8498 | 19.3014 | -9.8319 C.3  | 29 LEU284 | 0.3531  |
| 470 HG   | 10.4597 | 20.3166 | -9.7600 H    | 29 LEU284 | -0.0361 |
| 471 CD1  | 12.3291 | 19.3961 | -10.1806 C.3 | 29 LEU284 | -0.4121 |
| 472 HD11 | 12.7486 | 18.3932 | -10.2597 H   | 29 LEU284 | 0.1000  |
| 473 HD12 | 12.8518 | 19.9482 | -9.3995 H    | 29 LEU284 | 0.1000  |
| 474 HD13 | 12.4456 | 19.9147 | -11.1322 H   | 29 LEU284 | 0.1000  |
| 475 CD2  | 10.0652 | 18.5751 | -10.9295 C.3 | 29 LEU284 | -0.4121 |
| 476 HD21 | 10.4343 | 17.5539 | -11.0248 H   | 29 LEU284 | 0.1000  |
| 477 HD22 | 10.1960 | 19.0985 | -11.8766 H   | 29 LEU284 | 0.1000  |
| 478 HD23 | 9.0072  | 18.5561 | -10.6680 H   | 29 LEU284 | 0.1000  |
| 479 N    | 9.7151  | 18.1481 | -5.4992 N.am | 30 ALA285 | -0.4157 |
| BACKBONE |         |         |              |           |         |
| 480 H    | 10.3458 | 18.9342 | -5.4331 H    | 30 ALA285 | 0.2719  |
| 481 CA   | 9.5587  | 17.2575 | -4.3458 C.3  | 30 ALA285 | 0.0337  |
| BACKBONE |         |         |              |           |         |
| 482 HA   | 9.7373  | 16.2460 | -4.7106 H    | 30 ALA285 | 0.0823  |
| 483 C    | 8.1436  | 17.2840 | -3.7708 C.2  | 30 ALA285 | 0.5973  |
| BACKBONE |         |         |              |           |         |
| 484 O    | 7.6134  | 16.2340 | -3.4006 O.2  | 30 ALA285 | -0.5679 |
| BACKBONE |         |         |              |           |         |
| 485 CB   | 10.5850 | 17.5721 | -3.2622 C.3  | 30 ALA285 | -0.1825 |
| 486 HB1  | 10.4192 | 18.5819 | -2.8869 H    | 30 ALA285 | 0.0603  |
| 487 HB2  | 11.5889 | 17.5003 | -3.6808 H    | 30 ALA285 | 0.0603  |
| 488 HB3  | 10.4804 | 16.8588 | -2.4446 H    | 30 ALA285 | 0.0603  |
| 489 N    | 7.5340  | 18.4725 | -3.7049 N.am | 31 ARG286 | -0.3479 |
| BACKBONE |         |         |              |           |         |

|          |        |         |               |           |         |
|----------|--------|---------|---------------|-----------|---------|
| 490 H    | 8.0380 | 19.3053 | -3.9740 H     | 31 ARG286 | 0.2747  |
| 491 CA   | 6.1465 | 18.5851 | -3.2485 C.3   | 31 ARG286 | -0.2637 |
| BACKBONE |        |         |               |           |         |
| 492 HA   | 6.1321 | 18.1954 | -2.2307 H     | 31 ARG286 | 0.1560  |
| 493 C    | 5.1940 | 17.7561 | -4.1027 C.2   | 31 ARG286 | 0.7341  |
| BACKBONE |        |         |               |           |         |
| 494 O    | 4.2190 | 17.1956 | -3.5870 O.2   | 31 ARG286 | -0.5894 |
| BACKBONE |        |         |               |           |         |
| 495 CB   | 5.6725 | 20.0377 | -3.2335 C.3   | 31 ARG286 | -0.0007 |
| 496 HB2  | 5.9679 | 20.5028 | -4.1740 H     | 31 ARG286 | 0.0327  |
| 497 HB3  | 4.5855 | 20.0412 | -3.1521 H     | 31 ARG286 | 0.0327  |
| 498 CG   | 6.2363 | 20.8671 | -2.0963 C.3   | 31 ARG286 | 0.0390  |
| 499 HG2  | 7.2500 | 21.1785 | -2.3480 H     | 31 ARG286 | 0.0285  |
| 500 HG3  | 6.2564 | 20.2641 | -1.1885 H     | 31 ARG286 | 0.0285  |
| 501 CD   | 5.3768 | 22.1031 | -1.8581 C.3   | 31 ARG286 | 0.0486  |
| 502 HD2  | 5.7017 | 22.5813 | -0.9341 H     | 31 ARG286 | 0.0687  |
| 503 HD3  | 4.3369 | 21.7914 | -1.7598 H     | 31 ARG286 | 0.0687  |
| 504 NE   | 5.4738 | 23.0765 | -2.9496 N.pl3 | 31 ARG286 | -0.5295 |
| 505 HE   | 4.8138 | 22.9951 | -3.7099 H     | 31 ARG286 | 0.3456  |
| 506 CZ   | 6.3711 | 24.0629 | -3.0117 C.cat | 31 ARG286 | 0.8076  |
| 507 NH1  | 7.2762 | 24.2207 | -2.0480 N.pl3 | 31 ARG286 | -0.8627 |
| 508 HH12 | 7.2880 | 23.5911 | -1.2583 H     | 31 ARG286 | 0.4478  |
| 509 HH11 | 7.9509 | 24.9699 | -2.1066 H     | 31 ARG286 | 0.4478  |
| 510 NH2  | 6.3647 | 24.8983 | -4.0477 N.pl3 | 31 ARG286 | -0.8627 |
| 511 HH21 | 5.6825 | 24.7849 | -4.7837 H     | 31 ARG286 | 0.4478  |
| 512 HH22 | 7.0421 | 25.6457 | -4.0980 H     | 31 ARG286 | 0.4478  |
| 513 N    | 5.4844 | 17.6906 | -5.4022 N.am  | 32 ALA287 | -0.4157 |
| BACKBONE |        |         |               |           |         |
| 514 H    | 6.3015 | 18.1780 | -5.7413 H     | 32 ALA287 | 0.2719  |
| 515 CA   | 4.6650 | 16.9393 | -6.3595 C.3   | 32 ALA287 | 0.0337  |
| BACKBONE |        |         |               |           |         |
| 516 HA   | 3.6445 | 16.9710 | -5.9780 H     | 32 ALA287 | 0.0823  |
| 517 C    | 5.0199 | 15.4511 | -6.4491 C.2   | 32 ALA287 | 0.5973  |
| BACKBONE |        |         |               |           |         |
| 518 O    | 4.5687 | 14.7569 | -7.3568 O.2   | 32 ALA287 | -0.5679 |
| BACKBONE |        |         |               |           |         |
| 519 CB   | 4.7112 | 17.6029 | -7.7386 C.3   | 32 ALA287 | -0.1825 |
| 520 HB1  | 5.7309 | 17.5725 | -8.1225 H     | 32 ALA287 | 0.0603  |
| 521 HB2  | 4.3855 | 18.6397 | -7.6540 H     | 32 ALA287 | 0.0603  |
| 522 HB3  | 4.0499 | 17.0689 | -8.4210 H     | 32 ALA287 | 0.0603  |
| 523 N    | 5.8080 | 14.9620 | -5.4899 N.am  | 33 GLY288 | -0.4157 |
| BACKBONE |        |         |               |           |         |
| 524 H    | 6.2179 | 15.5997 | -4.8226 H     | 33 GLY288 | 0.2719  |
| 525 CA   | 6.0987 | 13.5303 | -5.3722 C.3   | 33 GLY288 | -0.0252 |
| BACKBONE |        |         |               |           |         |
| 526 HA2  | 6.1241 | 13.2803 | -4.3115 H     | 33 GLY288 | 0.0698  |
| 527 HA3  | 5.2884 | 12.9838 | -5.8549 H     | 33 GLY288 | 0.0698  |
| 528 C    | 7.4074 | 13.0676 | -5.9919 C.2   | 33 GLY288 | 0.5973  |
| BACKBONE |        |         |               |           |         |
| 529 O    | 7.7941 | 11.9043 | -5.8362 O.2   | 33 GLY288 | -0.5679 |
| BACKBONE |        |         |               |           |         |

|          |         |         |          |      |    |        |         |
|----------|---------|---------|----------|------|----|--------|---------|
| 530 N    | 8.0827  | 13.9752 | -6.6912  | N.am | 34 | PHE289 | -0.4157 |
| BACKBONE |         |         |          |      |    |        |         |
| 531 H    | 7.7448  | 14.9269 | -6.7032  | H    | 34 | PHE289 | 0.2719  |
| 532 CA   | 9.3010  | 13.6503 | -7.4475  | C.3  | 34 | PHE289 | -0.0024 |
| BACKBONE |         |         |          |      |    |        |         |
| 533 HA   | 9.1666  | 12.6133 | -7.7551  | H    | 34 | PHE289 | 0.0978  |
| 534 C    | 10.5923 | 13.7074 | -6.6283  | C.2  | 34 | PHE289 | 0.5973  |
| BACKBONE |         |         |          |      |    |        |         |
| 535 O    | 10.7541 | 14.5526 | -5.7404  | O.2  | 34 | PHE289 | -0.5679 |
| BACKBONE |         |         |          |      |    |        |         |
| 536 CB   | 9.4478  | 14.5682 | -8.6688  | C.3  | 34 | PHE289 | -0.0343 |
| 537 HB2  | 9.4853  | 15.6000 | -8.3197  | H    | 34 | PHE289 | 0.0295  |
| 538 HB3  | 10.3821 | 14.3210 | -9.1730  | H    | 34 | PHE289 | 0.0295  |
| 539 CG   | 8.3309  | 14.4465 | -9.6601  | C.ar | 34 | PHE289 | 0.0118  |
| 540 CD1  | 8.2469  | 13.3391 | -10.5059 | C.ar | 34 | PHE289 | -0.1256 |
| 541 HD1  | 8.9940  | 12.5617 | -10.4445 | H    | 34 | PHE289 | 0.1330  |
| 542 CD2  | 7.3616  | 15.4410 | -9.7527  | C.ar | 34 | PHE289 | -0.1256 |
| 543 HD2  | 7.4185  | 16.3037 | -9.1055  | H    | 34 | PHE289 | 0.1330  |
| 544 CE1  | 7.2092  | 13.2267 | -11.4284 | C.ar | 34 | PHE289 | -0.1704 |
| 545 HE1  | 7.1527  | 12.3663 | -12.0786 | H    | 34 | PHE289 | 0.1430  |
| 546 CE2  | 6.3242  | 15.3370 | -10.6662 | C.ar | 34 | PHE289 | -0.1704 |
| 547 HE2  | 5.5766  | 16.1140 | -10.7264 | H    | 34 | PHE289 | 0.1430  |
| 548 CZ   | 6.2473  | 14.2260 | -11.5085 | C.ar | 34 | PHE289 | -0.1072 |
| 549 HZ   | 5.4405  | 14.1434 | -12.2217 | H    | 34 | PHE289 | 0.1297  |
| 550 N    | 11.5067 | 12.7992 | -6.9486  | N.am | 35 | TYR290 | -0.4157 |
| BACKBONE |         |         |          |      |    |        |         |
| 551 H    | 11.2606 | 12.0802 | -7.6138  | H    | 35 | TYR290 | 0.2719  |
| 552 CA   | 12.8521 | 12.7943 | -6.3814  | C.3  | 35 | TYR290 | -0.0014 |
| BACKBONE |         |         |          |      |    |        |         |
| 553 HA   | 13.0301 | 13.7354 | -5.8611  | H    | 35 | TYR290 | 0.0876  |
| 554 C    | 13.8562 | 12.6450 | -7.5231  | C.2  | 35 | TYR290 | 0.5973  |
| BACKBONE |         |         |          |      |    |        |         |
| 555 O    | 13.5199 | 12.1013 | -8.5796  | O.2  | 35 | TYR290 | -0.5679 |
| BACKBONE |         |         |          |      |    |        |         |
| 556 CB   | 13.0223 | 11.6849 | -5.3232  | C.3  | 35 | TYR290 | -0.0152 |
| 557 HB2  | 14.0297 | 11.7629 | -4.9144  | H    | 35 | TYR290 | 0.0295  |
| 558 HB3  | 12.2942 | 11.8617 | -4.5316  | H    | 35 | TYR290 | 0.0295  |
| 559 CG   | 12.8304 | 10.2644 | -5.8262  | C.ar | 35 | TYR290 | -0.0011 |
| 560 CD1  | 13.9216 | 9.4967  | -6.2487  | C.ar | 35 | TYR290 | -0.1906 |
| 561 HD1  | 14.9133 | 9.9233  | -6.2197  | H    | 35 | TYR290 | 0.1699  |
| 562 CD2  | 11.5624 | 9.6801  | -5.8627  | C.ar | 35 | TYR290 | -0.1906 |
| 563 HD2  | 10.7063 | 10.2483 | -5.5300  | H    | 35 | TYR290 | 0.1699  |
| 564 CE1  | 13.7509 | 8.1912  | -6.7061  | C.ar | 35 | TYR290 | -0.2341 |
| 565 HE1  | 14.6031 | 7.6133  | -7.0319  | H    | 35 | TYR290 | 0.1656  |
| 566 CE2  | 11.3831 | 8.3781  | -6.3204  | C.ar | 35 | TYR290 | -0.2341 |
| 567 HE2  | 10.3944 | 7.9445  | -6.3489  | H    | 35 | TYR290 | 0.1656  |
| 568 CZ   | 12.4796 | 7.6399  | -6.7398  | C.ar | 35 | TYR290 | 0.3226  |
| 569 OH   | 12.2950 | 6.3526  | -7.1907  | O.3  | 35 | TYR290 | -0.5579 |
| 570 HH   | 12.9272 | 6.0595  | -7.8510  | H    | 35 | TYR290 | 0.3992  |
| 571 N    | 15.0752 | 13.1308 | -7.3049  | N.am | 36 | ALA291 | -0.4157 |
| BACKBONE |         |         |          |      |    |        |         |
| 572 H    | 15.2998 | 13.4877 | -6.3872  | H    | 36 | ALA291 | 0.2719  |

|          |         |         |          |      |    |        |         |
|----------|---------|---------|----------|------|----|--------|---------|
| 573 CA   | 16.1039 | 13.1671 | -8.3475  | C.3  | 36 | ALA291 | 0.0337  |
| BACKBONE |         |         |          |      |    |        |         |
| 574 HA   | 15.5762 | 13.2976 | -9.2923  | H    | 36 | ALA291 | 0.0823  |
| 575 C    | 16.8878 | 11.8646 | -8.4752  | C.2  | 36 | ALA291 | 0.5973  |
| BACKBONE |         |         |          |      |    |        |         |
| 576 O    | 17.1733 | 11.1833 | -7.4837  | O.2  | 36 | ALA291 | -0.5679 |
| BACKBONE |         |         |          |      |    |        |         |
| 577 CB   | 17.0535 | 14.3513 | -8.1273  | C.3  | 36 | ALA291 | -0.1825 |
| 578 HB1  | 17.5821 | 14.2224 | -7.1828  | H    | 36 | ALA291 | 0.0603  |
| 579 HB2  | 16.4791 | 15.2773 | -8.0989  | H    | 36 | ALA291 | 0.0603  |
| 580 HB3  | 17.7742 | 14.3958 | -8.9439  | H    | 36 | ALA291 | 0.0603  |
| 581 N    | 17.2385 | 11.5332 | -9.7132  | N.am | 37 | LEU292 | -0.4157 |
| BACKBONE |         |         |          |      |    |        |         |
| 582 H    | 16.9858 | 12.1460 | -10.4753 | H    | 37 | LEU292 | 0.2719  |
| 583 CA   | 17.9779 | 10.3102 | -10.0032 | C.3  | 37 | LEU292 | -0.0518 |
| BACKBONE |         |         |          |      |    |        |         |
| 584 HA   | 17.8862 | 9.6634  | -9.1306  | H    | 37 | LEU292 | 0.0922  |
| 585 C    | 19.4808 | 10.5389 | -10.1839 | C.2  | 37 | LEU292 | 0.5973  |
| BACKBONE |         |         |          |      |    |        |         |
| 586 O    | 20.2359 | 9.5906  | -10.3946 | O.2  | 37 | LEU292 | -0.5679 |
| BACKBONE |         |         |          |      |    |        |         |
| 587 CB   | 17.3649 | 9.6040  | -11.2175 | C.3  | 37 | LEU292 | -0.1102 |
| 588 HB2  | 17.4193 | 10.2815 | -12.0696 | H    | 37 | LEU292 | 0.0457  |
| 589 HB3  | 17.9535 | 8.7104  | -11.4255 | H    | 37 | LEU292 | 0.0457  |
| 590 CG   | 15.8989 | 9.1819  | -11.0314 | C.3  | 37 | LEU292 | 0.3531  |
| 591 HG   | 15.3166 | 10.0802 | -10.8266 | H    | 37 | LEU292 | -0.0361 |
| 592 CD1  | 15.3590 | 8.5389  | -12.2961 | C.3  | 37 | LEU292 | -0.4121 |
| 593 HD11 | 15.9301 | 7.6372  | -12.5175 | H    | 37 | LEU292 | 0.1000  |
| 594 HD12 | 15.4491 | 9.2391  | -13.1266 | H    | 37 | LEU292 | 0.1000  |
| 595 HD13 | 14.3104 | 8.2788  | -12.1523 | H    | 37 | LEU292 | 0.1000  |
| 596 CD2  | 15.7451 | 8.2366  | -9.8408  | C.3  | 37 | LEU292 | -0.4121 |
| 597 HD21 | 16.3196 | 7.3282  | -10.0216 | H    | 37 | LEU292 | 0.1000  |
| 598 HD22 | 14.6931 | 7.9817  | -9.7128  | H    | 37 | LEU292 | 0.1000  |
| 599 HD23 | 16.1129 | 8.7256  | -8.9388  | H    | 37 | LEU292 | 0.1000  |
| 600 N    | 19.9076 | 11.7964 | -10.0966 | N.am | 38 | GLY293 | -0.4157 |
| BACKBONE |         |         |          |      |    |        |         |
| 601 H    | 19.2306 | 12.5367 | -9.9796  | H    | 38 | GLY293 | 0.2719  |
| 602 CA   | 21.3261 | 12.1375 | -10.1650 | C.3  | 38 | GLY293 | -0.0252 |
| BACKBONE |         |         |          |      |    |        |         |
| 603 HA2  | 21.4553 | 13.1467 | -9.7740  | H    | 38 | GLY293 | 0.0698  |
| 604 HA3  | 21.8784 | 11.4334 | -9.5427  | H    | 38 | GLY293 | 0.0698  |
| 605 C    | 21.9032 | 12.0912 | -11.5640 | C.2  | 38 | GLY293 | 0.5973  |
| BACKBONE |         |         |          |      |    |        |         |
| 606 O    | 23.0968 | 11.8496 | -11.7438 | O.2  | 38 | GLY293 | -0.5679 |
| BACKBONE |         |         |          |      |    |        |         |
| 607 N    | 21.0515 | 12.3315 | -12.5554 | N.am | 39 | GLU294 | -0.5163 |
| BACKBONE |         |         |          |      |    |        |         |
| 608 H    | 20.0823 | 12.5081 | -12.3330 | H    | 39 | GLU294 | 0.2936  |
| 609 CA   | 21.4650 | 12.3489 | -13.9460 | C.3  | 39 | GLU294 | 0.0397  |
| BACKBONE |         |         |          |      |    |        |         |
| 610 HA   | 22.5341 | 12.5490 | -14.0173 | H    | 39 | GLU294 | 0.1105  |

|          |         |         |          |       |    |        |         |
|----------|---------|---------|----------|-------|----|--------|---------|
| 611 C    | 20.6891 | 13.4417 | -14.6598 | C.2   | 39 | GLU294 | 0.5366  |
| BACKBONE |         |         |          |       |    |        |         |
| 612 O    | 19.5257 | 13.2552 | -15.0142 | O.2   | 39 | GLU294 | -0.5819 |
| BACKBONE |         |         |          |       |    |        |         |
| 613 CB   | 21.2005 | 10.9888 | -14.5942 | C.3   | 39 | GLU294 | 0.0560  |
| 614 HB2  | 21.6231 | 10.2167 | -13.9512 | H     | 39 | GLU294 | -0.0173 |
| 615 HB3  | 20.1218 | 10.8502 | -14.6676 | H     | 39 | GLU294 | -0.0173 |
| 616 CG   | 21.7954 | 10.8289 | -15.9823 | C.3   | 39 | GLU294 | 0.0136  |
| 617 HG2  | 22.8807 | 10.8968 | -15.9070 | H     | 39 | GLU294 | -0.0425 |
| 618 HG3  | 21.4242 | 11.6342 | -16.6162 | H     | 39 | GLU294 | -0.0425 |
| 619 CD   | 21.4345 | 9.5006  | -16.6222 | C.2   | 39 | GLU294 | 0.8054  |
| 620 OE1  | 21.2387 | 8.5057  | -15.8848 | O.co2 | 39 | GLU294 | -0.8188 |
| 621 OE2  | 21.3437 | 9.4524  | -17.8689 | O.co2 | 39 | GLU294 | -0.8188 |
| 622 N    | 21.3328 | 14.5863 | -14.8611 | N.am  | 40 | GLY295 | -0.4157 |
| BACKBONE |         |         |          |       |    |        |         |
| 623 H    | 22.3160 | 14.6498 | -14.6384 | H     | 40 | GLY295 | 0.2719  |
| 624 CA   | 20.6401 | 15.7550 | -15.3999 | C.3   | 40 | GLY295 | -0.0252 |
| BACKBONE |         |         |          |       |    |        |         |
| 625 HA2  | 21.3271 | 16.6008 | -15.4275 | H     | 40 | GLY295 | 0.0698  |
| 626 HA3  | 20.2936 | 15.5354 | -16.4098 | H     | 40 | GLY295 | 0.0698  |
| 627 C    | 19.4460 | 16.1040 | -14.5220 | C.2   | 40 | GLY295 | 0.5973  |
| BACKBONE |         |         |          |       |    |        |         |
| 628 O    | 19.5210 | 15.9903 | -13.2903 | O.2   | 40 | GLY295 | -0.5679 |
| BACKBONE |         |         |          |       |    |        |         |
| 629 N    | 18.3442 | 16.5063 | -15.1515 | N.am  | 41 | ASP296 | -0.5163 |
| BACKBONE |         |         |          |       |    |        |         |
| 630 H    | 18.3457 | 16.5565 | -16.1603 | H     | 41 | ASP296 | 0.2936  |
| 631 CA   | 17.1276 | 16.8790 | -14.4208 | C.3   | 41 | ASP296 | 0.0381  |
| BACKBONE |         |         |          |       |    |        |         |
| 632 HA   | 17.4561 | 17.1397 | -13.4147 | H     | 41 | ASP296 | 0.0880  |
| 633 C    | 16.1274 | 15.7297 | -14.2457 | C.2   | 41 | ASP296 | 0.5366  |
| BACKBONE |         |         |          |       |    |        |         |
| 634 O    | 14.9699 | 15.9498 | -13.8771 | O.2   | 41 | ASP296 | -0.5819 |
| BACKBONE |         |         |          |       |    |        |         |
| 635 CB   | 16.4512 | 18.1060 | -15.0654 | C.3   | 41 | ASP296 | -0.0303 |
| 636 HB2  | 17.2119 | 18.8667 | -15.2406 | H     | 41 | ASP296 | -0.0122 |
| 637 HB3  | 15.7043 | 18.4920 | -14.3716 | H     | 41 | ASP296 | -0.0122 |
| 638 CG   | 15.7617 | 17.7955 | -16.3955 | C.2   | 41 | ASP296 | 0.7994  |
| 639 OD1  | 15.8640 | 16.6623 | -16.9287 | O.co2 | 41 | ASP296 | -0.8014 |
| 640 OD2  | 15.0978 | 18.7168 | -16.9138 | O.co2 | 41 | ASP296 | -0.8014 |
| 641 N    | 16.5854 | 14.5097 | -14.5178 | N.am  | 42 | LYS297 | -0.3479 |
| BACKBONE |         |         |          |       |    |        |         |
| 642 H    | 17.5536 | 14.4053 | -14.7856 | H     | 42 | LYS297 | 0.2747  |
| 643 CA   | 15.7480 | 13.3168 | -14.4457 | C.3   | 42 | LYS297 | -0.2400 |
| BACKBONE |         |         |          |       |    |        |         |
| 644 HA   | 14.9185 | 13.4475 | -15.1407 | H     | 42 | LYS297 | 0.1426  |
| 645 C    | 15.1569 | 13.1208 | -13.0473 | C.2   | 42 | LYS297 | 0.7341  |
| BACKBONE |         |         |          |       |    |        |         |
| 646 O    | 15.8912 | 13.0227 | -12.0585 | O.2   | 42 | LYS297 | -0.5894 |
| BACKBONE |         |         |          |       |    |        |         |
| 647 CB   | 16.5684 | 12.0877 | -14.8395 | C.3   | 42 | LYS297 | -0.0094 |
| 648 HB2  | 17.3141 | 12.3963 | -15.5722 | H     | 42 | LYS297 | 0.0362  |

|          |      |         |         |          |      |    |        |         |
|----------|------|---------|---------|----------|------|----|--------|---------|
| 649      | HB3  | 17.0694 | 11.7123 | -13.9472 | H    | 42 | LYS297 | 0.0362  |
| 650      | CG   | 15.7595 | 10.9611 | -15.4355 | C.3  | 42 | LYS297 | 0.0187  |
| 651      | HG2  | 14.8645 | 10.8144 | -14.8308 | H    | 42 | LYS297 | 0.0103  |
| 652      | HG3  | 15.4713 | 11.2355 | -16.4503 | H    | 42 | LYS297 | 0.0103  |
| 653      | CD   | 16.5389 | 9.6489  | -15.4846 | C.3  | 42 | LYS297 | -0.0479 |
| 654      | HD2  | 15.8651 | 8.8559  | -15.8089 | H    | 42 | LYS297 | 0.0621  |
| 655      | HD3  | 16.9078 | 9.4256  | -14.4835 | H    | 42 | LYS297 | 0.0621  |
| 656      | CE   | 17.7250 | 9.7007  | -16.4400 | C.3  | 42 | LYS297 | -0.0143 |
| 657      | HE2  | 18.4488 | 10.4287 | -16.0738 | H    | 42 | LYS297 | 0.1135  |
| 658      | HE3  | 17.3765 | 10.0004 | -17.4284 | H    | 42 | LYS297 | 0.1135  |
| 659      | NZ   | 18.3815 | 8.3588  | -16.5353 | N.4  | 42 | LYS297 | -0.3854 |
| 660      | HZ3  | 18.7084 | 8.0783  | -15.6218 | H    | 42 | LYS297 | 0.3400  |
| 661      | HZ1  | 19.1641 | 8.4113  | -17.1716 | H    | 42 | LYS297 | 0.3400  |
| 662      | HZ2  | 17.7148 | 7.6813  | -16.8770 | H    | 42 | LYS297 | 0.3400  |
| 663      | N    | 13.8276 | 13.0782 | -12.9780 | N.am | 43 | VAL298 | -0.4157 |
| BACKBONE |      |         |         |          |      |    |        |         |
| 664      | H    | 13.2930 | 13.2377 | -13.8200 | H    | 43 | VAL298 | 0.2719  |
| 665      | CA   | 13.1101 | 12.8095 | -11.7304 | C.3  | 43 | VAL298 | -0.0875 |
| BACKBONE |      |         |         |          |      |    |        |         |
| 666      | HA   | 13.8753 | 12.5079 | -11.0151 | H    | 43 | VAL298 | 0.0969  |
| 667      | C    | 12.0999 | 11.6727 | -11.8905 | C.2  | 43 | VAL298 | 0.5973  |
| BACKBONE |      |         |         |          |      |    |        |         |
| 668      | O    | 11.7757 | 11.2702 | -13.0131 | O.2  | 43 | VAL298 | -0.5679 |
| BACKBONE |      |         |         |          |      |    |        |         |
| 669      | CB   | 12.3909 | 14.0733 | -11.1563 | C.3  | 43 | VAL298 | 0.2985  |
| 670      | HB   | 11.8724 | 13.7701 | -10.2467 | H    | 43 | VAL298 | -0.0297 |
| 671      | CG1  | 13.3967 | 15.1595 | -10.7759 | C.3  | 43 | VAL298 | -0.3192 |
| 672      | HG11 | 13.9338 | 15.4853 | -11.6667 | H    | 43 | VAL298 | 0.0791  |
| 673      | HG12 | 14.1053 | 14.7604 | -10.0501 | H    | 43 | VAL298 | 0.0791  |
| 674      | HG13 | 12.8685 | 16.0072 | -10.3396 | H    | 43 | VAL298 | 0.0791  |
| 675      | CG2  | 11.3402 | 14.6067 | -12.1277 | C.3  | 43 | VAL298 | -0.3192 |
| 676      | HG21 | 11.8258 | 14.9203 | -13.0519 | H    | 43 | VAL298 | 0.0791  |
| 677      | HG22 | 10.8293 | 15.4584 | -11.6787 | H    | 43 | VAL298 | 0.0791  |
| 678      | HG23 | 10.6156 | 13.8223 | -12.3460 | H    | 43 | VAL298 | 0.0791  |
| 679      | N    | 11.6020 | 11.1747 | -10.7589 | N.am | 44 | LYS299 | -0.3479 |
| BACKBONE |      |         |         |          |      |    |        |         |
| 680      | H    | 11.8882 | 11.5913 | -9.8844  | H    | 44 | LYS299 | 0.2747  |
| 681      | CA   | 10.6654 | 10.0592 | -10.7204 | C.3  | 44 | LYS299 | -0.2400 |
| BACKBONE |      |         |         |          |      |    |        |         |
| 682      | HA   | 10.0576 | 10.0362 | -11.6248 | H    | 44 | LYS299 | 0.1426  |
| 683      | C    | 9.7608  | 10.2257 | -9.4966  | C.2  | 44 | LYS299 | 0.7341  |
| BACKBONE |      |         |         |          |      |    |        |         |
| 684      | O    | 10.2114 | 10.6745 | -8.4399  | O.2  | 44 | LYS299 | -0.5894 |
| BACKBONE |      |         |         |          |      |    |        |         |
| 685      | CB   | 11.4560 | 8.7549  | -10.6079 | C.3  | 44 | LYS299 | -0.0094 |
| 686      | HB2  | 12.3196 | 8.8325  | -11.2686 | H    | 44 | LYS299 | 0.0362  |
| 687      | HB3  | 11.7952 | 8.6606  | -9.5763  | H    | 44 | LYS299 | 0.0362  |
| 688      | CG   | 10.7183 | 7.4922  | -10.9648 | C.3  | 44 | LYS299 | 0.0187  |
| 689      | HG2  | 9.7252  | 7.5046  | -10.5155 | H    | 44 | LYS299 | 0.0103  |
| 690      | HG3  | 10.6261 | 7.4113  | -12.0479 | H    | 44 | LYS299 | 0.0103  |
| 691      | CD   | 11.5140 | 6.3138  | -10.4252 | C.3  | 44 | LYS299 | -0.0479 |
| 692      | HD2  | 11.0742 | 6.0009  | -9.4782  | H    | 44 | LYS299 | 0.0621  |

|          |     |         |         |          |      |    |        |         |
|----------|-----|---------|---------|----------|------|----|--------|---------|
| 693      | HD3 | 12.5425 | 6.6346  | -10.2598 | H    | 44 | LYS299 | 0.0621  |
| 694      | CE  | 11.5224 | 5.1343  | -11.3659 | C.3  | 44 | LYS299 | -0.0143 |
| 695      | HE2 | 10.4915 | 4.8595  | -11.5894 | H    | 44 | LYS299 | 0.1135  |
| 696      | HE3 | 12.0224 | 4.2999  | -10.8741 | H    | 44 | LYS299 | 0.1135  |
| 697      | NZ  | 12.2270 | 5.4241  | -12.6473 | N.4  | 44 | LYS299 | -0.3854 |
| 698      | HZ3 | 11.7683 | 6.1912  | -13.1178 | H    | 44 | LYS299 | 0.3400  |
| 699      | HZ1 | 12.2032 | 4.6047  | -13.2374 | H    | 44 | LYS299 | 0.3400  |
| 700      | HZ2 | 13.1869 | 5.6727  | -12.4550 | H    | 44 | LYS299 | 0.3400  |
| 701      | N   | 8.4906  | 9.8600  | -9.6339  | N.am | 45 | CYS300 | -0.4157 |
| BACKBONE |     |         |         |          |      |    |        |         |
| 702      | H   | 8.1563  | 9.5392  | -10.5314 | H    | 45 | CYS300 | 0.2719  |
| 703      | CA  | 7.5739  | 9.9178  | -8.4988  | C.3  | 45 | CYS300 | -0.0351 |
| BACKBONE |     |         |         |          |      |    |        |         |
| 704      | HA  | 7.8588  | 10.7688 | -7.8800  | H    | 45 | CYS300 | 0.0508  |
| 705      | C   | 7.6759  | 8.6640  | -7.6302  | C.2  | 45 | CYS300 | 0.5973  |
| BACKBONE |     |         |         |          |      |    |        |         |
| 706      | O   | 7.7141  | 7.5453  | -8.1471  | O.2  | 45 | CYS300 | -0.5679 |
| BACKBONE |     |         |         |          |      |    |        |         |
| 707      | CB  | 6.1511  | 10.1178 | -8.9840  | C.3  | 45 | CYS300 | -0.2413 |
| 708      | HB2 | 5.9515  | 9.3738  | -9.7551  | H    | 45 | CYS300 | 0.1122  |
| 709      | HB3 | 6.0808  | 11.1162 | -9.4156  | H    | 45 | CYS300 | 0.1122  |
| 710      | SG  | 4.8729  | 9.9668  | -7.7222  | S.3  | 45 | CYS300 | -0.8844 |
| 711      | N   | 7.7213  | 8.8629  | -6.3120  | N.am | 46 | PHE301 | -0.4157 |
| BACKBONE |     |         |         |          |      |    |        |         |
| 712      | H   | 7.6542  | 9.8079  | -5.9620  | H    | 46 | PHE301 | 0.2719  |
| 713      | CA  | 7.8651  | 7.7611  | -5.3471  | C.3  | 46 | PHE301 | -0.0024 |
| BACKBONE |     |         |         |          |      |    |        |         |
| 714      | HA  | 8.7349  | 7.1927  | -5.6764  | H    | 46 | PHE301 | 0.0978  |
| 715      | C   | 6.6745  | 6.8072  | -5.3269  | C.2  | 46 | PHE301 | 0.5973  |
| BACKBONE |     |         |         |          |      |    |        |         |
| 716      | O   | 6.8035  | 5.6538  | -4.8933  | O.2  | 46 | PHE301 | -0.5679 |
| BACKBONE |     |         |         |          |      |    |        |         |
| 717      | CB  | 8.0764  | 8.3127  | -3.9337  | C.3  | 46 | PHE301 | -0.0343 |
| 718      | HB2 | 8.5409  | 7.5349  | -3.3276  | H    | 46 | PHE301 | 0.0295  |
| 719      | HB3 | 8.7444  | 9.1715  | -3.9968  | H    | 46 | PHE301 | 0.0295  |
| 720      | CG  | 6.8053  | 8.7493  | -3.2523  | C.ar | 46 | PHE301 | 0.0118  |
| 721      | CD1 | 6.1146  | 7.8704  | -2.4141  | C.ar | 46 | PHE301 | -0.1256 |
| 722      | HD1 | 6.4981  | 6.8736  | -2.2529  | H    | 46 | PHE301 | 0.1330  |
| 723      | CD2 | 6.2967  | 10.0271 | -3.4509  | C.ar | 46 | PHE301 | -0.1256 |
| 724      | HD2 | 6.8209  | 10.7152 | -4.0975  | H    | 46 | PHE301 | 0.1330  |
| 725      | CE1 | 4.9348  | 8.2663  | -1.7829  | C.ar | 46 | PHE301 | -0.1704 |
| 726      | HE1 | 4.4069  | 7.5773  | -1.1403  | H    | 46 | PHE301 | 0.1430  |
| 727      | CE2 | 5.1173  | 10.4322 | -2.8251  | C.ar | 46 | PHE301 | -0.1704 |
| 728      | HE2 | 4.7286  | 11.4260 | -2.9915  | H    | 46 | PHE301 | 0.1430  |
| 729      | CZ  | 4.4420  | 9.5470  | -1.9831  | C.ar | 46 | PHE301 | -0.1072 |
| 730      | HZ  | 3.5350  | 9.8597  | -1.4873  | H    | 46 | PHE301 | 0.1297  |
| 731      | N   | 5.5148  | 7.2908  | -5.7649  | N.am | 47 | HIS302 | -0.4157 |
| BACKBONE |     |         |         |          |      |    |        |         |
| 732      | H   | 5.4859  | 8.1957  | -6.2125  | H    | 47 | HIS302 | 0.2719  |
| 733      | CA  | 4.2880  | 6.5248  | -5.6033  | C.3  | 47 | HIS302 | -0.0581 |
| BACKBONE |     |         |         |          |      |    |        |         |
| 734      | HA  | 4.4598  | 5.7962  | -4.8111  | H    | 47 | HIS302 | 0.1360  |



|          |         |        |          |       |    |        |         |
|----------|---------|--------|----------|-------|----|--------|---------|
| 735 C    | 3.9421  | 5.7436 | -6.8648  | C.2   | 47 | HIS302 | 0.5973  |
| BACKBONE |         |        |          |       |    |        |         |
| 736 O    | 3.8412  | 4.5193 | -6.8225  | O.2   | 47 | HIS302 | -0.5679 |
| BACKBONE |         |        |          |       |    |        |         |
| 737 CB   | 3.1266  | 7.4244 | -5.1643  | C.3   | 47 | HIS302 | -0.0074 |
| 738 HB2  | 2.6270  | 7.8016 | -6.0566  | H     | 47 | HIS302 | 0.0367  |
| 739 HB3  | 3.5343  | 8.2601 | -4.5955  | H     | 47 | HIS302 | 0.0367  |
| 740 CG   | 2.1098  | 6.7226 | -4.3127  | C.2   | 47 | HIS302 | 0.1868  |
| 741 ND1  | 1.4155  | 5.6115 | -4.7439  | N.2   | 47 | HIS302 | -0.5432 |
| 742 CD2  | 1.6799  | 6.9692 | -3.0520  | C.2   | 47 | HIS302 | -0.2207 |
| 743 HD2  | 2.0149  | 7.7661 | -2.4046  | H     | 47 | HIS302 | 0.1862  |
| 744 CE1  | 0.5997  | 5.2061 | -3.7878  | C.2   | 47 | HIS302 | 0.1635  |
| 745 HE1  | -0.0667 | 4.3580 | -3.8434  | H     | 47 | HIS302 | 0.1435  |
| 746 NE2  | 0.7372  | 6.0147 | -2.7512  | N.pl3 | 47 | HIS302 | -0.2795 |
| 747 HE2  | 0.2318  | 5.9429 | -1.8797  | H     | 47 | HIS302 | 0.3339  |
| 748 N    | 3.7738  | 6.4409 | -7.9860  | N.am  | 48 | CYS303 | -0.4157 |
| BACKBONE |         |        |          |       |    |        |         |
| 749 H    | 3.8860  | 7.4445 | -7.9727  | H     | 48 | CYS303 | 0.2719  |
| 750 CA   | 3.4266  | 5.7643 | -9.2421  | C.3   | 48 | CYS303 | -0.0351 |
| BACKBONE |         |        |          |       |    |        |         |
| 751 HA   | 2.8073  | 4.9128 | -8.9601  | H     | 48 | CYS303 | 0.0508  |
| 752 C    | 4.6387  | 5.1892 | -9.9877  | C.2   | 48 | CYS303 | 0.5973  |
| BACKBONE |         |        |          |       |    |        |         |
| 753 O    | 4.4834  | 4.3211 | -10.8498 | O.2   | 48 | CYS303 | -0.5679 |
| BACKBONE |         |        |          |       |    |        |         |
| 754 CB   | 2.6251  | 6.6956 | -10.1614 | C.3   | 48 | CYS303 | -0.2413 |
| 755 HB2  | 1.7471  | 7.0381 | -9.6139  | H     | 48 | CYS303 | 0.1122  |
| 756 HB3  | 2.3090  | 6.1214 | -11.0323 | H     | 48 | CYS303 | 0.1122  |
| 757 SG   | 3.5254  | 8.1503 | -10.7451 | S.3   | 48 | CYS303 | -0.8844 |
| 758 N    | 5.8356  | 5.6697 | -9.6532  | N.am  | 49 | GLY304 | -0.4157 |
| BACKBONE |         |        |          |       |    |        |         |
| 759 H    | 5.8960  | 6.3643 | -8.9225  | H     | 49 | GLY304 | 0.2719  |
| 760 CA   | 7.0694  | 5.2232 | -10.3114 | C.3   | 49 | GLY304 | -0.0252 |
| BACKBONE |         |        |          |       |    |        |         |
| 761 HA2  | 7.9077  | 5.4365 | -9.6482  | H     | 49 | GLY304 | 0.0698  |
| 762 HA3  | 7.0002  | 4.1479 | -10.4751 | H     | 49 | GLY304 | 0.0698  |
| 763 C    | 7.3371  | 5.8951 | -11.6524 | C.2   | 49 | GLY304 | 0.5973  |
| BACKBONE |         |        |          |       |    |        |         |
| 764 O    | 8.2753  | 5.5292 | -12.3601 | O.2   | 49 | GLY304 | -0.5679 |
| BACKBONE |         |        |          |       |    |        |         |
| 765 N    | 6.5060  | 6.8724 | -12.0035 | N.am  | 50 | GLY305 | -0.4157 |
| BACKBONE |         |        |          |       |    |        |         |
| 766 H    | 5.7625  | 7.1324 | -11.3712 | H     | 50 | GLY305 | 0.2719  |
| 767 CA   | 6.6337  | 7.5808 | -13.2723 | C.3   | 50 | GLY305 | -0.0252 |
| BACKBONE |         |        |          |       |    |        |         |
| 768 HA2  | 6.7697  | 6.8452 | -14.0651 | H     | 50 | GLY305 | 0.0698  |
| 769 HA3  | 5.7145  | 8.1394 | -13.4487 | H     | 50 | GLY305 | 0.0698  |
| 770 C    | 7.7978  | 8.5494 | -13.3132 | C.2   | 50 | GLY305 | 0.5973  |
| BACKBONE |         |        |          |       |    |        |         |
| 771 O    | 7.9163  | 9.4297 | -12.4517 | O.2   | 50 | GLY305 | -0.5679 |
| BACKBONE |         |        |          |       |    |        |         |

|          |         |         |          |      |    |        |         |
|----------|---------|---------|----------|------|----|--------|---------|
| 772 N    | 8.6423  | 8.3972  | -14.3313 | N.am | 51 | GLY306 | -0.4157 |
| BACKBONE |         |         |          |      |    |        |         |
| 773 H    | 8.4898  | 7.6415  | -14.9839 | H    | 51 | GLY306 | 0.2719  |
| 774 CA   | 9.7833  | 9.2884  | -14.5353 | C.3  | 51 | GLY306 | -0.0252 |
| BACKBONE |         |         |          |      |    |        |         |
| 775 HA2  | 10.0373 | 9.7482  | -13.5803 | H    | 51 | GLY306 | 0.0698  |
| 776 HA3  | 10.6265 | 8.6946  | -14.8882 | H    | 51 | GLY306 | 0.0698  |
| 777 C    | 9.5157  | 10.3920 | -15.5449 | C.2  | 51 | GLY306 | 0.5973  |
| BACKBONE |         |         |          |      |    |        |         |
| 778 O    | 8.7475  | 10.2032 | -16.4932 | O.2  | 51 | GLY306 | -0.5679 |
| BACKBONE |         |         |          |      |    |        |         |
| 779 N    | 10.1455 | 11.5481 | -15.3355 | N.am | 52 | LEU307 | -0.4157 |
| BACKBONE |         |         |          |      |    |        |         |
| 780 H    | 10.6838 | 11.6617 | -14.4884 | H    | 52 | LEU307 | 0.2719  |
| 781 CA   | 10.0864 | 12.6617 | -16.2889 | C.3  | 52 | LEU307 | -0.0518 |
| BACKBONE |         |         |          |      |    |        |         |
| 782 HA   | 9.8394  | 12.2388 | -17.2627 | H    | 52 | LEU307 | 0.0922  |
| 783 C    | 11.4332 | 13.3700 | -16.3819 | C.2  | 52 | LEU307 | 0.5973  |
| BACKBONE |         |         |          |      |    |        |         |
| 784 O    | 12.1136 | 13.5828 | -15.3702 | O.2  | 52 | LEU307 | -0.5679 |
| BACKBONE |         |         |          |      |    |        |         |
| 785 CB   | 8.9950  | 13.6702 | -15.9096 | C.3  | 52 | LEU307 | -0.1102 |
| 786 HB2  | 9.1467  | 13.9320 | -14.8624 | H    | 52 | LEU307 | 0.0457  |
| 787 HB3  | 9.1420  | 14.5542 | -16.5301 | H    | 52 | LEU307 | 0.0457  |
| 788 CG   | 7.5274  | 13.2437 | -16.0646 | C.3  | 52 | LEU307 | 0.3531  |
| 789 HG   | 7.3984  | 12.3239 | -15.4941 | H    | 52 | LEU307 | -0.0361 |
| 790 CD1  | 6.5781  | 14.2930 | -15.4811 | C.3  | 52 | LEU307 | -0.4121 |
| 791 HD11 | 6.6850  | 15.2268 | -16.0331 | H    | 52 | LEU307 | 0.1000  |
| 792 HD12 | 6.8226  | 14.4610 | -14.4322 | H    | 52 | LEU307 | 0.1000  |
| 793 HD13 | 5.5506  | 13.9386 | -15.5623 | H    | 52 | LEU307 | 0.1000  |
| 794 CD2  | 7.1761  | 12.9262 | -17.5233 | C.3  | 52 | LEU307 | -0.4121 |
| 795 HD21 | 7.2933  | 13.8247 | -18.1291 | H    | 52 | LEU307 | 0.1000  |
| 796 HD22 | 6.1439  | 12.5807 | -17.5816 | H    | 52 | LEU307 | 0.1000  |
| 797 HD23 | 7.8415  | 12.1475 | -17.8961 | H    | 52 | LEU307 | 0.1000  |
| 798 N    | 11.7977 | 13.7418 | -17.6035 | N.am | 53 | THR308 | -0.4157 |
| BACKBONE |         |         |          |      |    |        |         |
| 799 H    | 11.1750 | 13.5552 | -18.3766 | H    | 53 | THR308 | 0.2719  |
| 800 CA   | 13.0652 | 14.4097 | -17.8659 | C.3  | 53 | THR308 | -0.0389 |
| BACKBONE |         |         |          |      |    |        |         |
| 801 HA   | 13.4545 | 14.7736 | -16.9150 | H    | 53 | THR308 | 0.1007  |
| 802 C    | 12.8696 | 15.6079 | -18.7965 | C.2  | 53 | THR308 | 0.5973  |
| BACKBONE |         |         |          |      |    |        |         |
| 803 O    | 11.8099 | 15.7508 | -19.4108 | O.2  | 53 | THR308 | -0.5679 |
| BACKBONE |         |         |          |      |    |        |         |
| 804 CB   | 14.0916 | 13.4201 | -18.4733 | C.3  | 53 | THR308 | 0.3654  |
| 805 HB   | 14.0463 | 12.4939 | -17.9005 | H    | 53 | THR308 | 0.0043  |
| 806 OG1  | 15.4060 | 13.9823 | -18.3964 | O.3  | 53 | THR308 | -0.6761 |
| 807 HG1  | 15.4000 | 14.8034 | -18.8938 | H    | 53 | THR308 | 0.4102  |
| 808 CG2  | 13.7615 | 13.0989 | -19.9325 | C.3  | 53 | THR308 | -0.2438 |
| 809 HG21 | 13.8014 | 14.0137 | -20.5239 | H    | 53 | THR308 | 0.0642  |
| 810 HG22 | 12.7611 | 12.6705 | -19.9929 | H    | 53 | THR308 | 0.0642  |
| 811 HG23 | 14.4871 | 12.3837 | -20.3202 | H    | 53 | THR308 | 0.0642  |

|          |         |         |          |       |    |        |         |
|----------|---------|---------|----------|-------|----|--------|---------|
| 812 N    | 13.8959 | 16.4581 | -18.8870 | N.am  | 54 | ASP309 | -0.5163 |
| BACKBONE |         |         |          |       |    |        |         |
| 813 H    | 14.6940 | 16.3137 | -18.2851 | H     | 54 | ASP309 | 0.2936  |
| 814 CA   | 13.9201 | 17.5934 | -19.8200 | C.3   | 54 | ASP309 | 0.0381  |
| BACKBONE |         |         |          |       |    |        |         |
| 815 HA   | 14.8261 | 18.1698 | -19.6326 | H     | 54 | ASP309 | 0.0880  |
| 816 C    | 12.7433 | 18.5402 | -19.5704 | C.2   | 54 | ASP309 | 0.5366  |
| BACKBONE |         |         |          |       |    |        |         |
| 817 O    | 11.9096 | 18.7954 | -20.4482 | O.2   | 54 | ASP309 | -0.5819 |
| BACKBONE |         |         |          |       |    |        |         |
| 818 CB   | 14.0038 | 17.1154 | -21.2797 | C.3   | 54 | ASP309 | -0.0303 |
| 819 HB2  | 13.9572 | 17.9851 | -21.9350 | H     | 54 | ASP309 | -0.0122 |
| 820 HB3  | 13.1551 | 16.4620 | -21.4823 | H     | 54 | ASP309 | -0.0122 |
| 821 CG   | 15.2956 | 16.3473 | -21.5750 | C.2   | 54 | ASP309 | 0.7994  |
| 822 OD1  | 16.2737 | 16.4903 | -20.8107 | O.co2 | 54 | ASP309 | -0.8014 |
| 823 OD2  | 15.3403 | 15.5998 | -22.5724 | O.co2 | 54 | ASP309 | -0.8014 |
| 824 N    | 12.6956 | 19.0453 | -18.3424 | N.am  | 55 | TRP310 | -0.4157 |
| BACKBONE |         |         |          |       |    |        |         |
| 825 H    | 13.4168 | 18.7795 | -17.6872 | H     | 55 | TRP310 | 0.2719  |
| 826 CA   | 11.6562 | 19.9637 | -17.8911 | C.3   | 55 | TRP310 | -0.0275 |
| BACKBONE |         |         |          |       |    |        |         |
| 827 HA   | 10.7045 | 19.6180 | -18.2947 | H     | 55 | TRP310 | 0.1123  |
| 828 C    | 11.9207 | 21.3772 | -18.3787 | C.2   | 55 | TRP310 | 0.5973  |
| BACKBONE |         |         |          |       |    |        |         |
| 829 O    | 13.0667 | 21.8330 | -18.3865 | O.2   | 55 | TRP310 | -0.5679 |
| BACKBONE |         |         |          |       |    |        |         |
| 830 CB   | 11.6316 | 19.9865 | -16.3688 | C.3   | 55 | TRP310 | -0.0050 |
| 831 HB2  | 12.6511 | 20.1444 | -16.0170 | H     | 55 | TRP310 | 0.0339  |
| 832 HB3  | 11.0052 | 20.8210 | -16.0538 | H     | 55 | TRP310 | 0.0339  |
| 833 CG   | 11.1085 | 18.7490 | -15.7264 | C.2   | 55 | TRP310 | -0.1415 |
| 834 CD1  | 11.7429 | 17.5417 | -15.6135 | C.2   | 55 | TRP310 | -0.1638 |
| 835 HD1  | 12.7266 | 17.3212 | -16.0010 | H     | 55 | TRP310 | 0.2062  |
| 836 CD2  | 9.8494  | 18.6039 | -15.0715 | C.ar  | 55 | TRP310 | 0.1243  |
| 837 NE1  | 10.9430 | 16.6477 | -14.9328 | N.pl3 | 55 | TRP310 | -0.3418 |
| 838 HE1  | 11.1780 | 15.6878 | -14.7243 | H     | 55 | TRP310 | 0.3412  |
| 839 CE2  | 9.7778  | 17.2771 | -14.5868 | C.ar  | 55 | TRP310 | 0.1380  |
| 840 CE3  | 8.7705  | 19.4686 | -14.8426 | C.ar  | 55 | TRP310 | -0.2387 |
| 841 HE3  | 8.7977  | 20.4898 | -15.1929 | H     | 55 | TRP310 | 0.1700  |
| 842 CZ2  | 8.6623  | 16.7917 | -13.8941 | C.ar  | 55 | TRP310 | -0.2601 |
| 843 HZ2  | 8.6242  | 15.7733 | -13.5365 | H     | 55 | TRP310 | 0.1572  |
| 844 CZ3  | 7.6640  | 18.9824 | -14.1542 | C.ar  | 55 | TRP310 | -0.1972 |
| 845 HZ3  | 6.8224  | 19.6354 | -13.9754 | H     | 55 | TRP310 | 0.1447  |
| 846 CH2  | 7.6202  | 17.6578 | -13.6870 | C.ar  | 55 | TRP310 | -0.1134 |
| 847 HH2  | 6.7463  | 17.3147 | -13.1531 | H     | 55 | TRP310 | 0.1417  |
| 848 N    | 10.8574 | 22.0742 | -18.7708 | N.am  | 56 | LYS311 | -0.3479 |
| BACKBONE |         |         |          |       |    |        |         |
| 849 H    | 9.9531  | 21.6246 | -18.7850 | H     | 56 | LYS311 | 0.2747  |
| 850 CA   | 10.9625 | 23.4699 | -19.1806 | C.3   | 56 | LYS311 | -0.2400 |
| BACKBONE |         |         |          |       |    |        |         |
| 851 HA   | 11.9892 | 23.6814 | -19.4795 | H     | 56 | LYS311 | 0.1426  |
| 852 C    | 10.5956 | 24.3760 | -18.0053 | C.2   | 56 | LYS311 | 0.7341  |
| BACKBONE |         |         |          |       |    |        |         |

|          |         |         |               |           |         |
|----------|---------|---------|---------------|-----------|---------|
| 853 O    | 9.8119  | 23.9746 | -17.1372 O.2  | 56 LYS311 | -0.5894 |
| BACKBONE |         |         |               |           |         |
| 854 CB   | 10.1613 | 23.5927 | -20.5529 C.3  | 56 LYS311 | -0.0094 |
| 855 HB2  | 9.2363  | 24.1057 | -20.2877 H    | 56 LYS311 | 0.0362  |
| 856 HB3  | 10.6980 | 24.2913 | -21.1947 H    | 56 LYS311 | 0.0362  |
| 857 CG   | 9.6945  | 22.3622 | -21.4724 C.3  | 56 LYS311 | 0.0187  |
| 858 HG2  | 9.5131  | 21.5054 | -20.8368 H    | 56 LYS311 | 0.0103  |
| 859 HG3  | 8.7123  | 22.6643 | -21.8387 H    | 56 LYS311 | 0.0103  |
| 860 CD   | 10.4123 | 21.7591 | -22.7469 C.3  | 56 LYS311 | -0.0479 |
| 861 HD2  | 11.2335 | 21.1271 | -22.4022 H    | 56 LYS311 | 0.0621  |
| 862 HD3  | 10.8286 | 22.5703 | -23.3429 H    | 56 LYS311 | 0.0621  |
| 863 CE   | 9.4526  | 20.8930 | -23.6725 C.3  | 56 LYS311 | -0.0143 |
| 864 HE2  | 8.7547  | 21.5603 | -24.1803 H    | 56 LYS311 | 0.1135  |
| 865 HE3  | 8.8705  | 20.2388 | -23.0215 H    | 56 LYS311 | 0.1135  |
| 866 NZ   | 10.1910 | 20.0210 | -24.7125 N.4  | 56 LYS311 | -0.3854 |
| 867 HZ2  | 10.8578 | 19.4739 | -24.0816 H    | 56 LYS311 | 0.0000  |
| 868 HZ3  | 10.8021 | 20.7063 | -25.2638 H    | 56 LYS311 | 0.0000  |
| 869 N    | 11.1602 | 25.5995 | -17.9586 N.am | 57 PRO312 | -0.2548 |
| BACKBONE |         |         |               |           |         |
| 870 CA   | 10.8998 | 26.4799 | -16.8073 C.3  | 57 PRO312 | -0.0266 |
| BACKBONE |         |         |               |           |         |
| 871 HA   | 11.1036 | 25.9522 | -15.8756 H    | 57 PRO312 | 0.0641  |
| 872 C    | 9.4416  | 26.9246 | -16.6400 C.2  | 57 PRO312 | 0.5896  |
| BACKBONE |         |         |               |           |         |
| 873 O    | 9.0555  | 27.3723 | -15.5516 O.2  | 57 PRO312 | -0.5748 |
| BACKBONE |         |         |               |           |         |
| 874 CB   | 11.8014 | 27.6900 | -17.0790 C.3  | 57 PRO312 | -0.0070 |
| 875 HB2  | 11.3141 | 28.6115 | -16.7606 H    | 57 PRO312 | 0.0253  |
| 876 HB3  | 12.7536 | 27.5842 | -16.5594 H    | 57 PRO312 | 0.0253  |
| 877 CG   | 12.0030 | 27.6865 | -18.5390 C.3  | 57 PRO312 | 0.0189  |
| 878 HG2  | 12.9329 | 28.1933 | -18.7969 H    | 57 PRO312 | 0.0213  |
| 879 HG3  | 11.1697 | 28.1789 | -19.0404 H    | 57 PRO312 | 0.0213  |
| 880 CD   | 12.0687 | 26.2344 | -18.9287 C.3  | 57 PRO312 | 0.0192  |
| 881 HD2  | 13.0825 | 25.8462 | -18.8306 H    | 57 PRO312 | 0.0391  |
| 882 HD3  | 11.7198 | 26.0851 | -19.9505 H    | 57 PRO312 | 0.0391  |
| 883 N    | 8.6497  | 26.7982 | -17.7022 N.am | 58 SER313 | -0.4157 |
| BACKBONE |         |         |               |           |         |
| 884 H    | 9.0403  | 26.4275 | -18.5566 H    | 58 SER313 | 0.2719  |
| 885 CA   | 7.2310  | 27.1759 | -17.6820 C.3  | 58 SER313 | -0.0249 |
| BACKBONE |         |         |               |           |         |
| 886 HA   | 7.1441  | 28.0432 | -17.0276 H    | 58 SER313 | 0.0843  |
| 887 C    | 6.3379  | 26.0743 | -17.1169 C.2  | 58 SER313 | 0.5973  |
| BACKBONE |         |         |               |           |         |
| 888 O    | 5.1482  | 26.2964 | -16.8695 O.2  | 58 SER313 | -0.5679 |
| BACKBONE |         |         |               |           |         |
| 889 CB   | 6.7635  | 27.5198 | -19.0974 C.3  | 58 SER313 | 0.2117  |
| 890 HB2  | 7.3666  | 28.3420 | -19.4827 H    | 58 SER313 | 0.0352  |
| 891 HB3  | 5.7166  | 27.8214 | -19.0643 H    | 58 SER313 | 0.0352  |
| 892 OG   | 6.8979  | 26.4006 | -19.9599 O.3  | 58 SER313 | -0.6546 |
| 893 HG   | 6.5931  | 26.6668 | -20.8304 H    | 58 SER313 | 0.4275  |
| 894 N    | 6.9109  | 24.8959 | -16.9054 N.am | 59 GLU314 | -0.5163 |
| BACKBONE |         |         |               |           |         |

|          |        |         |          |       |    |        |         |
|----------|--------|---------|----------|-------|----|--------|---------|
| 895 H    | 7.9147 | 24.8128 | -16.9805 | H     | 59 | GLU314 | 0.2936  |
| 896 CA   | 6.1187 | 23.7174 | -16.5663 | C.3   | 59 | GLU314 | 0.0397  |
| BACKBONE |        |         |          |       |    |        |         |
| 897 HA   | 5.1268 | 23.8824 | -16.9871 | H     | 59 | GLU314 | 0.1105  |
| 898 C    | 5.8875 | 23.5327 | -15.0738 | C.2   | 59 | GLU314 | 0.5366  |
| BACKBONE |        |         |          |       |    |        |         |
| 899 O    | 6.8147 | 23.6341 | -14.2634 | O.2   | 59 | GLU314 | -0.5819 |
| BACKBONE |        |         |          |       |    |        |         |
| 900 CB   | 6.7328 | 22.4666 | -17.1976 | C.3   | 59 | GLU314 | 0.0560  |
| 901 HB2  | 7.7422 | 22.3341 | -16.8081 | H     | 59 | GLU314 | -0.0173 |
| 902 HB3  | 6.1244 | 21.6022 | -16.9316 | H     | 59 | GLU314 | -0.0173 |
| 903 CG   | 6.7999 | 22.5736 | -18.7112 | C.3   | 59 | GLU314 | 0.0136  |
| 904 HG2  | 7.4357 | 23.4208 | -18.9682 | H     | 59 | GLU314 | -0.0425 |
| 905 HG3  | 5.7923 | 22.7478 | -19.0887 | H     | 59 | GLU314 | -0.0425 |
| 906 CD   | 7.3535 | 21.3423 | -19.3835 | C.2   | 59 | GLU314 | 0.8054  |
| 907 OE1  | 8.2950 | 20.7229 | -18.8410 | O.co2 | 59 | GLU314 | -0.8188 |
| 908 OE2  | 6.8530 | 21.0088 | -20.4773 | O.co2 | 59 | GLU314 | -0.8188 |
| 909 N    | 4.6287 | 23.2819 | -14.7231 | N.am  | 60 | ASP315 | -0.5163 |
| BACKBONE |        |         |          |       |    |        |         |
| 910 H    | 3.9175 | 23.2662 | -15.4401 | H     | 60 | ASP315 | 0.2936  |
| 911 CA   | 4.2403 | 23.0296 | -13.3449 | C.3   | 60 | ASP315 | 0.0381  |
| BACKBONE |        |         |          |       |    |        |         |
| 912 HA   | 4.9182 | 23.5469 | -12.6660 | H     | 60 | ASP315 | 0.0880  |
| 913 C    | 4.3132 | 21.5299 | -13.0898 | C.2   | 60 | ASP315 | 0.5366  |
| BACKBONE |        |         |          |       |    |        |         |
| 914 O    | 3.6995 | 20.7541 | -13.8263 | O.2   | 60 | ASP315 | -0.5819 |
| BACKBONE |        |         |          |       |    |        |         |
| 915 CB   | 2.8297 | 23.5638 | -13.0791 | C.3   | 60 | ASP315 | -0.0303 |
| 916 HB2  | 2.1279 | 23.0296 | -13.7196 | H     | 60 | ASP315 | -0.0122 |
| 917 HB3  | 2.8074 | 24.6260 | -13.3226 | H     | 60 | ASP315 | -0.0122 |
| 918 CG   | 2.4002 | 23.3879 | -11.6366 | C.2   | 60 | ASP315 | 0.7994  |
| 919 OD1  | 1.8323 | 22.3267 | -11.3094 | O.co2 | 60 | ASP315 | -0.8014 |
| 920 OD2  | 2.6227 | 24.3128 | -10.8272 | O.co2 | 60 | ASP315 | -0.8014 |
| 921 N    | 5.0862 | 21.1130 | -12.0654 | N.am  | 61 | PRO316 | -0.2548 |
| BACKBONE |        |         |          |       |    |        |         |
| 922 CA   | 5.2239 | 19.6959 | -11.7326 | C.3   | 61 | PRO316 | -0.0266 |
| BACKBONE |        |         |          |       |    |        |         |
| 923 HA   | 5.6754 | 19.1424 | -12.5559 | H     | 61 | PRO316 | 0.0641  |
| 924 C    | 3.8962 | 18.9525 | -11.5230 | C.2   | 61 | PRO316 | 0.5896  |
| BACKBONE |        |         |          |       |    |        |         |
| 925 O    | 3.7605 | 17.8180 | -11.9787 | O.2   | 61 | PRO316 | -0.5748 |
| BACKBONE |        |         |          |       |    |        |         |
| 926 CB   | 6.0704 | 19.7179 | -10.4508 | C.3   | 61 | PRO316 | -0.0070 |
| 927 HB2  | 5.4348 | 19.7598 | -9.5663  | H     | 61 | PRO316 | 0.0253  |
| 928 HB3  | 6.7134 | 18.8395 | -10.3949 | H     | 61 | PRO316 | 0.0253  |
| 929 CG   | 6.8774 | 20.9565 | -10.5813 | C.3   | 61 | PRO316 | 0.0189  |
| 930 HG2  | 7.7348 | 20.7928 | -11.2340 | H     | 61 | PRO316 | 0.0213  |
| 931 HG3  | 7.2234 | 21.2975 | -9.6055  | H     | 61 | PRO316 | 0.0213  |
| 932 CD   | 5.9248 | 21.9525 | -11.1890 | C.3   | 61 | PRO316 | 0.0192  |
| 933 HD2  | 6.4608 | 22.7072 | -11.7646 | H     | 61 | PRO316 | 0.0391  |
| 934 HD3  | 5.3242 | 22.4399 | -10.4211 | H     | 61 | PRO316 | 0.0391  |

|          |         |         |          |       |    |        |         |
|----------|---------|---------|----------|-------|----|--------|---------|
| 935 N    | 2.9212  | 19.5891 | -10.8738 | N.am  | 62 | TRP317 | -0.4157 |
| BACKBONE |         |         |          |       |    |        |         |
| 936 H    | 3.0844  | 20.5204 | -10.5185 | H     | 62 | TRP317 | 0.2719  |
| 937 CA   | 1.6154  | 18.9548 | -10.6689 | C.3   | 62 | TRP317 | -0.0275 |
| BACKBONE |         |         |          |       |    |        |         |
| 938 HA   | 1.8240  | 17.9670 | -10.2580 | H     | 62 | TRP317 | 0.1123  |
| 939 C    | 0.8378  | 18.7502 | -11.9730 | C.2   | 62 | TRP317 | 0.5973  |
| BACKBONE |         |         |          |       |    |        |         |
| 940 O    | 0.1866  | 17.7231 | -12.1531 | O.2   | 62 | TRP317 | -0.5679 |
| BACKBONE |         |         |          |       |    |        |         |
| 941 CB   | 0.7642  | 19.7472 | -9.6703  | C.3   | 62 | TRP317 | -0.0050 |
| 942 HB2  | 0.9769  | 20.8071 | -9.8102  | H     | 62 | TRP317 | 0.0339  |
| 943 HB3  | -0.2854 | 19.5548 | -9.8926  | H     | 62 | TRP317 | 0.0339  |
| 944 CG   | 1.0059  | 19.4081 | -8.2208  | C.2   | 62 | TRP317 | -0.1415 |
| 945 CD1  | 1.2492  | 20.2881 | -7.2058  | C.2   | 62 | TRP317 | -0.1638 |
| 946 HD1  | 1.3108  | 21.3605 | -7.3188  | H     | 62 | TRP317 | 0.2062  |
| 947 CD2  | 1.0045  | 18.1002 | -7.6265  | C.ar  | 62 | TRP317 | 0.1243  |
| 948 NE1  | 1.4047  | 19.6111 | -6.0184  | N.pl3 | 62 | TRP317 | -0.3418 |
| 949 HE1  | 1.5942  | 20.0355 | -5.1217  | H     | 62 | TRP317 | 0.3412  |
| 950 CE2  | 1.2610  | 18.2680 | -6.2487  | C.ar  | 62 | TRP317 | 0.1380  |
| 951 CE3  | 0.8262  | 16.8027 | -8.1278  | C.ar  | 62 | TRP317 | -0.2387 |
| 952 HE3  | 0.6379  | 16.6394 | -9.1787  | H     | 62 | TRP317 | 0.1700  |
| 953 CZ2  | 1.3334  | 17.1862 | -5.3589  | C.ar  | 62 | TRP317 | -0.2601 |
| 954 HZ2  | 1.5272  | 17.3375 | -4.3073  | H     | 62 | TRP317 | 0.1572  |
| 955 CZ3  | 0.8971  | 15.7244 | -7.2404  | C.ar  | 62 | TRP317 | -0.1972 |
| 956 HZ3  | 0.7562  | 14.7199 | -7.6112  | H     | 62 | TRP317 | 0.1447  |
| 957 CH2  | 1.1485  | 15.9284 | -5.8753  | C.ar  | 62 | TRP317 | -0.1134 |
| 958 HH2  | 1.1978  | 15.0751 | -5.2152  | H     | 62 | TRP317 | 0.1417  |
| 959 N    | 0.9102  | 19.7337 | -12.8694 | N.am  | 63 | GLU318 | -0.5163 |
| BACKBONE |         |         |          |       |    |        |         |
| 960 H    | 1.4501  | 20.5582 | -12.6487 | H     | 63 | GLU318 | 0.2936  |
| 961 CA   | 0.2313  | 19.6562 | -14.1644 | C.3   | 63 | GLU318 | 0.0397  |
| BACKBONE |         |         |          |       |    |        |         |
| 962 HA   | -0.8133 | 19.4089 | -13.9756 | H     | 63 | GLU318 | 0.1105  |
| 963 C    | 0.8221  | 18.5518 | -15.0350 | C.2   | 63 | GLU318 | 0.5366  |
| BACKBONE |         |         |          |       |    |        |         |
| 964 O    | 0.0844  | 17.7964 | -15.6687 | O.2   | 63 | GLU318 | -0.5819 |
| BACKBONE |         |         |          |       |    |        |         |
| 965 CB   | 0.2810  | 21.0061 | -14.8903 | C.3   | 63 | GLU318 | 0.0560  |
| 966 HB2  | 1.3208  | 21.3281 | -14.9485 | H     | 63 | GLU318 | -0.0173 |
| 967 HB3  | -0.1144 | 20.8709 | -15.8970 | H     | 63 | GLU318 | -0.0173 |
| 968 CG   | -0.5272 | 22.1037 | -14.1964 | C.3   | 63 | GLU318 | 0.0136  |
| 969 HG2  | -0.1384 | 22.2321 | -13.1862 | H     | 63 | GLU318 | -0.0425 |
| 970 HG3  | -1.5688 | 21.7864 | -14.1472 | H     | 63 | GLU318 | -0.0425 |
| 971 CD   | -0.4658 | 23.4469 | -14.9107 | C.2   | 63 | GLU318 | 0.8054  |
| 972 OE1  | 0.2186  | 23.5561 | -15.9517 | O.co2 | 63 | GLU318 | -0.8188 |
| 973 OE2  | -1.1125 | 24.3993 | -14.4244 | O.co2 | 63 | GLU318 | -0.8188 |
| 974 N    | 2.1509  | 18.4677 | -15.0593 | N.am  | 64 | GLN319 | -0.4157 |
| BACKBONE |         |         |          |       |    |        |         |
| 975 H    | 2.6934  | 19.1633 | -14.5675 | H     | 64 | GLN319 | 0.2719  |
| 976 CA   | 2.8509  | 17.4013 | -15.7747 | C.3   | 64 | GLN319 | -0.0031 |
| BACKBONE |         |         |          |       |    |        |         |

|          |         |         |               |           |         |
|----------|---------|---------|---------------|-----------|---------|
| 977 HA   | 2.4870  | 17.4015 | -16.8022 H    | 64 GLN319 | 0.0850  |
| 978 C    | 2.5499  | 16.0240 | -15.1738 C.2  | 64 GLN319 | 0.5973  |
| BACKBONE |         |         |               |           |         |
| 979 O    | 2.3285  | 15.0531 | -15.9062 O.2  | 64 GLN319 | -0.5679 |
| BACKBONE |         |         |               |           |         |
| 980 CB   | 4.3604  | 17.6608 | -15.7812 C.3  | 64 GLN319 | -0.0036 |
| 981 HB2  | 4.6694  | 17.9094 | -14.7659 H    | 64 GLN319 | 0.0171  |
| 982 HB3  | 4.8634  | 16.7483 | -16.1008 H    | 64 GLN319 | 0.0171  |
| 983 CG   | 4.7951  | 18.8014 | -16.7101 C.3  | 64 GLN319 | -0.0645 |
| 984 HG2  | 5.8483  | 19.0170 | -16.5304 H    | 64 GLN319 | 0.0352  |
| 985 HG3  | 4.1993  | 19.6851 | -16.4820 H    | 64 GLN319 | 0.0352  |
| 986 CD   | 4.6122  | 18.4559 | -18.1728 C.2  | 64 GLN319 | 0.6951  |
| 987 OE1  | 5.1539  | 17.4658 | -18.6630 O.2  | 64 GLN319 | -0.6086 |
| 988 NE2  | 3.8397  | 19.2698 | -18.8772 N.am | 64 GLN319 | -0.9407 |
| 989 HE22 | 3.4146  | 20.0717 | -18.4342 H    | 64 GLN319 | 0.4251  |
| 990 HE21 | 3.6759  | 19.0883 | -19.8571 H    | 64 GLN319 | 0.4251  |
| 991 N    | 2.5479  | 15.9476 | -13.8445 N.am | 65 HIS320 | -0.4157 |
| BACKBONE |         |         |               |           |         |
| 992 H    | 2.7668  | 16.7743 | -13.3071 H    | 65 HIS320 | 0.2719  |
| 993 CA   | 2.2384  | 14.7026 | -13.1360 C.3  | 65 HIS320 | 0.0188  |
| BACKBONE |         |         |               |           |         |
| 994 HA   | 2.9970  | 13.9645 | -13.3966 H    | 65 HIS320 | 0.0881  |
| 995 C    | 0.8654  | 14.1717 | -13.5611 C.2  | 65 HIS320 | 0.5973  |
| BACKBONE |         |         |               |           |         |
| 996 O    | 0.7175  | 12.9887 | -13.8569 O.2  | 65 HIS320 | -0.5679 |
| BACKBONE |         |         |               |           |         |
| 997 CB   | 2.2689  | 14.9234 | -11.6198 C.3  | 65 HIS320 | -0.0462 |
| 998 HB2  | 1.2865  | 15.2753 | -11.3047 H    | 65 HIS320 | 0.0402  |
| 999 HB3  | 3.0158  | 15.6860 | -11.3992 H    | 65 HIS320 | 0.0402  |
| 1000 CG  | 2.6033  | 13.6961 | -10.8337 C.2  | 65 HIS320 | -0.0266 |
| 1001 ND1 | 3.2445  | 13.7466 | -9.6130 N.pl3 | 65 HIS320 | -0.3811 |
| 1002 HD2 | 3.5574  | 14.6488 | -9.1085 H     | 65 HIS320 | 0.3649  |
| 1003 CD2 | 2.4024  | 12.3827 | -11.0988 C.2  | 65 HIS320 | 0.1292  |
| 1004 HD2 | 1.9228  | 11.9718 | -11.9749 H    | 65 HIS320 | 0.1147  |
| 1005 CE1 | 3.4155  | 12.5181 | -9.1583 C.2   | 65 HIS320 | 0.2057  |
| 1006 HE1 | 3.8795  | 12.2507 | -8.2205 H     | 65 HIS320 | 0.1392  |
| 1007 NE2 | 2.9223  | 11.6717 | -10.0460 N.2  | 65 HIS320 | -0.5727 |
| 1008 N   | -0.1236 | 15.0600 | -13.6161 N.am | 66 ALA321 | -0.4157 |
| BACKBONE |         |         |               |           |         |
| 1009 H   | 0.0753  | 16.0263 | -13.3999 H    | 66 ALA321 | 0.2719  |
| 1010 CA  | -1.4907 | 14.6828 | -13.9797 C.3  | 66 ALA321 | 0.0337  |
| BACKBONE |         |         |               |           |         |
| 1011 HA  | -1.7082 | 13.7514 | -13.4569 H    | 66 ALA321 | 0.0823  |
| 1012 C   | -1.6547 | 14.3998 | -15.4716 C.2  | 66 ALA321 | 0.5973  |
| BACKBONE |         |         |               |           |         |
| 1013 O   | -2.4667 | 13.5597 | -15.8607 O.2  | 66 ALA321 | -0.5679 |
| BACKBONE |         |         |               |           |         |
| 1014 CB  | -2.4634 | 15.7505 | -13.5404 C.3  | 66 ALA321 | -0.1825 |
| 1015 HB1 | -2.2433 | 16.6805 | -14.0647 H    | 66 ALA321 | 0.0603  |
| 1016 HB2 | -2.3691 | 15.9082 | -12.4660 H    | 66 ALA321 | 0.0603  |
| 1017 HB3 | -3.4801 | 15.4339 | -13.7733 H    | 66 ALA321 | 0.0603  |

|          |         |         |          |       |    |        |         |
|----------|---------|---------|----------|-------|----|--------|---------|
| 1018 N   | -0.8989 | 15.1170 | -16.3009 | N.am  | 67 | LYS322 | -0.3479 |
| BACKBONE |         |         |          |       |    |        |         |
| 1019 H   | -0.2832 | 15.8185 | -15.9149 | H     | 67 | LYS322 | 0.2747  |
| 1020 CA  | -0.9285 | 14.9248 | -17.7550 | C.3   | 67 | LYS322 | -0.2400 |
| BACKBONE |         |         |          |       |    |        |         |
| 1021 HA  | -1.9571 | 15.0333 | -18.0989 | H     | 67 | LYS322 | 0.1426  |
| 1022 C   | -0.4598 | 13.5197 | -18.1304 | C.2   | 67 | LYS322 | 0.7341  |
| BACKBONE |         |         |          |       |    |        |         |
| 1023 O   | -1.1416 | 12.8050 | -18.8690 | O.2   | 67 | LYS322 | -0.5894 |
| BACKBONE |         |         |          |       |    |        |         |
| 1024 CB  | -0.0642 | 15.9922 | -18.4437 | C.3   | 67 | LYS322 | -0.0094 |
| 1025 HB2 | -0.5404 | 16.9603 | -18.2879 | H     | 67 | LYS322 | 0.0362  |
| 1026 HB3 | 0.9158  | 15.9884 | -17.9666 | H     | 67 | LYS322 | 0.0362  |
| 1027 CG  | 0.1434  | 15.8086 | -19.9396 | C.3   | 67 | LYS322 | 0.0187  |
| 1028 HG2 | 0.3326  | 14.7557 | -20.1487 | H     | 67 | LYS322 | 0.0103  |
| 1029 HG3 | -0.7549 | 16.1282 | -20.4679 | H     | 67 | LYS322 | 0.0103  |
| 1030 CD  | 1.3380  | 16.6422 | -20.4247 | C.3   | 67 | LYS322 | -0.0479 |
| 1031 HD2 | 2.2287  | 16.3310 | -19.8790 | H     | 67 | LYS322 | 0.0621  |
| 1032 HD3 | 1.1376  | 17.6945 | -20.2230 | H     | 67 | LYS322 | 0.0621  |
| 1033 CE  | 1.5901  | 16.4670 | -21.9191 | C.3   | 67 | LYS322 | -0.0143 |
| 1034 HE2 | 2.4144  | 17.1172 | -22.2122 | H     | 67 | LYS322 | 0.1135  |
| 1035 HE3 | 0.6893  | 16.7558 | -22.4607 | H     | 67 | LYS322 | 0.1135  |
| 1036 NZ  | 1.9366  | 15.0643 | -22.2843 | N.4   | 67 | LYS322 | -0.3854 |
| 1037 HZ3 | 2.7753  | 14.7863 | -21.7948 | H     | 67 | LYS322 | 0.3400  |
| 1038 HZ1 | 2.0927  | 15.0045 | -23.2804 | H     | 67 | LYS322 | 0.3400  |
| 1039 HZ2 | 1.1768  | 14.4514 | -22.0252 | H     | 67 | LYS322 | 0.3400  |
| 1040 N   | 0.6966  | 13.1268 | -17.5959 | N.am  | 68 | TRP323 | -0.4157 |
| BACKBONE |         |         |          |       |    |        |         |
| 1041 H   | 1.1478  | 13.7259 | -16.9195 | H     | 68 | TRP323 | 0.2719  |
| 1042 CA  | 1.3347  | 11.8643 | -17.9512 | C.3   | 68 | TRP323 | -0.0275 |
| BACKBONE |         |         |          |       |    |        |         |
| 1043 HA  | 1.0771  | 11.6701 | -18.9924 | H     | 68 | TRP323 | 0.1123  |
| 1044 C   | 0.8320  | 10.7036 | -17.1106 | C.2   | 68 | TRP323 | 0.5973  |
| BACKBONE |         |         |          |       |    |        |         |
| 1045 O   | 0.6762  | 9.5880  | -17.6192 | O.2   | 68 | TRP323 | -0.5679 |
| BACKBONE |         |         |          |       |    |        |         |
| 1046 CB  | 2.8500  | 11.9670 | -17.7888 | C.3   | 68 | TRP323 | -0.0050 |
| 1047 HB2 | 3.0619  | 12.3279 | -16.7824 | H     | 68 | TRP323 | 0.0339  |
| 1048 HB3 | 3.2752  | 10.9713 | -17.9147 | H     | 68 | TRP323 | 0.0339  |
| 1049 CG  | 3.5135  | 12.8887 | -18.7681 | C.2   | 68 | TRP323 | -0.1415 |
| 1050 CD1 | 3.8932  | 14.1828 | -18.5507 | C.2   | 68 | TRP323 | -0.1638 |
| 1051 HD1 | 3.7545  | 14.7202 | -17.6242 | H     | 68 | TRP323 | 0.2062  |
| 1052 CD2 | 3.8978  | 12.5757 | -20.1137 | C.ar  | 68 | TRP323 | 0.1243  |
| 1053 NE1 | 4.4778  | 14.7027 | -19.6828 | N.pl3 | 68 | TRP323 | -0.3418 |
| 1054 HE1 | 4.8324  | 15.6433 | -19.7813 | H     | 68 | TRP323 | 0.3412  |
| 1055 CE2 | 4.5009  | 13.7361 | -20.6554 | C.ar  | 68 | TRP323 | 0.1380  |
| 1056 CE3 | 3.7891  | 11.4297 | -20.9166 | C.ar  | 68 | TRP323 | -0.2387 |
| 1057 HE3 | 3.3348  | 10.5285 | -20.5322 | H     | 68 | TRP323 | 0.1700  |
| 1058 CZ2 | 4.9928  | 13.7857 | -21.9671 | C.ar  | 68 | TRP323 | -0.2601 |
| 1059 HZ2 | 5.4464  | 14.6830 | -22.3614 | H     | 68 | TRP323 | 0.1572  |
| 1060 CZ3 | 4.2789  | 11.4785 | -22.2187 | C.ar  | 68 | TRP323 | -0.1972 |
| 1061 HZ3 | 4.2008  | 10.6045 | -22.8483 | H     | 68 | TRP323 | 0.1447  |



|          |     |         |         |          |      |    |        |         |
|----------|-----|---------|---------|----------|------|----|--------|---------|
| 1062     | CH2 | 4.8769  | 12.6528 | -22.7311 | C.ar | 68 | TRP323 | -0.1134 |
| 1063     | HH2 | 5.2499  | 12.6576 | -23.7447 | H    | 68 | TRP323 | 0.1417  |
| 1064     | N   | 0.5855  | 10.9624 | -15.8272 | N.am | 69 | TYR324 | -0.4157 |
| BACKBONE |     |         |         |          |      |    |        |         |
| 1065     | H   | 0.5865  | 11.9198 | -15.5055 | H    | 69 | TYR324 | 0.2719  |
| 1066     | CA  | 0.3136  | 9.8866  | -14.8762 | C.3  | 69 | TYR324 | -0.0014 |
| BACKBONE |     |         |         |          |      |    |        |         |
| 1067     | HA  | 0.1088  | 8.9866  | -15.4561 | H    | 69 | TYR324 | 0.0876  |
| 1068     | C   | -0.9436 | 10.1317 | -14.0281 | C.2  | 69 | TYR324 | 0.5973  |
| BACKBONE |     |         |         |          |      |    |        |         |
| 1069     | O   | -0.8636 | 10.2198 | -12.8020 | O.2  | 69 | TYR324 | -0.5679 |
| BACKBONE |     |         |         |          |      |    |        |         |
| 1070     | CB  | 1.5455  | 9.6533  | -13.9878 | C.3  | 69 | TYR324 | -0.0152 |
| 1071     | HB2 | 1.6526  | 10.5096 | -13.3221 | H    | 69 | TYR324 | 0.0295  |
| 1072     | HB3 | 1.3744  | 8.7532  | -13.3974 | H    | 69 | TYR324 | 0.0295  |
| 1073     | CG  | 2.8536  | 9.4790  | -14.7555 | C.ar | 69 | TYR324 | -0.0011 |
| 1074     | CD1 | 3.9643  | 10.2789 | -14.4764 | C.ar | 69 | TYR324 | -0.1906 |
| 1075     | HD1 | 3.8981  | 11.0304 | -13.7036 | H    | 69 | TYR324 | 0.1699  |
| 1076     | CD2 | 2.9725  | 8.5149  | -15.7629 | C.ar | 69 | TYR324 | -0.1906 |
| 1077     | HD2 | 2.1256  | 7.8865  | -15.9963 | H    | 69 | TYR324 | 0.1699  |
| 1078     | CE1 | 5.1660  | 10.1200 | -15.1860 | C.ar | 69 | TYR324 | -0.2341 |
| 1079     | HE1 | 6.0177  | 10.7464 | -14.9654 | H    | 69 | TYR324 | 0.1656  |
| 1080     | CE2 | 4.1537  | 8.3500  | -16.4666 | C.ar | 69 | TYR324 | -0.2341 |
| 1081     | HE2 | 4.2224  | 7.6006  | -17.2413 | H    | 69 | TYR324 | 0.1656  |
| 1082     | CZ  | 5.2461  | 9.1483  | -16.1743 | C.ar | 69 | TYR324 | 0.3226  |
| 1083     | OH  | 6.4116  | 8.9631  | -16.8820 | O.3  | 69 | TYR324 | -0.5579 |
| 1084     | HH  | 7.1334  | 9.5457  | -16.6346 | H    | 69 | TYR324 | 0.3992  |
| 1085     | N   | -2.1166 | 10.2107 | -14.6821 | N.am | 70 | PRO325 | -0.2548 |
| BACKBONE |     |         |         |          |      |    |        |         |
| 1086     | CA  | -3.3459 | 10.5777 | -13.9772 | C.3  | 70 | PRO325 | -0.0266 |
| BACKBONE |     |         |         |          |      |    |        |         |
| 1087     | HA  | -3.1876 | 11.4631 | -13.3616 | H    | 70 | PRO325 | 0.0641  |
| 1088     | C   | -3.8494 | 9.5315  | -12.9775 | C.2  | 70 | PRO325 | 0.5896  |
| BACKBONE |     |         |         |          |      |    |        |         |
| 1089     | O   | -4.7560 | 9.8205  | -12.2000 | O.2  | 70 | PRO325 | -0.5748 |
| BACKBONE |     |         |         |          |      |    |        |         |
| 1090     | CB  | -4.3525 | 10.7437 | -15.1151 | C.3  | 70 | PRO325 | -0.0070 |
| 1091     | HB2 | -5.3542 | 10.4635 | -14.7894 | H    | 70 | PRO325 | 0.0253  |
| 1092     | HB3 | -4.3622 | 11.7721 | -15.4760 | H    | 70 | PRO325 | 0.0253  |
| 1093     | CG  | -3.8586 | 9.8104  | -16.1803 | C.3  | 70 | PRO325 | 0.0189  |
| 1094     | HG2 | -4.2406 | 10.0996 | -17.1593 | H    | 70 | PRO325 | 0.0213  |
| 1095     | HG3 | -4.1520 | 8.7830  | -15.9648 | H    | 70 | PRO325 | 0.0213  |
| 1096     | CD  | -2.3693 | 9.9665  | -16.1188 | C.3  | 70 | PRO325 | 0.0192  |
| 1097     | HD2 | -2.0392 | 10.8113 | -16.7232 | H    | 70 | PRO325 | 0.0391  |
| 1098     | HD3 | -1.8666 | 9.0601  | -16.4559 | H    | 70 | PRO325 | 0.0391  |
| 1099     | N   | -3.2763 | 8.3308  | -13.0149 | N.am | 71 | GLY326 | -0.4157 |
| BACKBONE |     |         |         |          |      |    |        |         |
| 1100     | H   | -2.5530 | 8.1546  | -13.6976 | H    | 71 | GLY326 | 0.2719  |
| 1101     | CA  | -3.6600 | 7.2634  | -12.1020 | C.3  | 71 | GLY326 | -0.0252 |
| BACKBONE |     |         |         |          |      |    |        |         |
| 1102     | HA2 | -4.7100 | 7.3974  | -11.8421 | H    | 71 | GLY326 | 0.0698  |
| 1103     | HA3 | -3.5318 | 6.3112  | -12.6169 | H    | 71 | GLY326 | 0.0698  |

|          |         |         |          |      |    |        |         |
|----------|---------|---------|----------|------|----|--------|---------|
| 1104 C   | -2.8553 | 7.2212  | -10.8191 | C.2  | 71 | GLY326 | 0.5973  |
| BACKBONE |         |         |          |      |    |        |         |
| 1105 O   | -3.0700 | 6.3429  | -9.9816  | O.2  | 71 | GLY326 | -0.5679 |
| BACKBONE |         |         |          |      |    |        |         |
| 1106 N   | -1.9333 | 8.1719  | -10.6580 | N.am | 72 | CYS327 | -0.4157 |
| BACKBONE |         |         |          |      |    |        |         |
| 1107 H   | -1.8142 | 8.8729  | -11.3753 | H    | 72 | CYS327 | 0.2719  |
| 1108 CA  | -1.0945 | 8.2185  | -9.4665  | C.3  | 72 | CYS327 | -0.0351 |
| BACKBONE |         |         |          |      |    |        |         |
| 1109 HA  | -0.6295 | 7.2382  | -9.3620  | H    | 72 | CYS327 | 0.0508  |
| 1110 C   | -1.9124 | 8.4998  | -8.2107  | C.2  | 72 | CYS327 | 0.5973  |
| BACKBONE |         |         |          |      |    |        |         |
| 1111 O   | -2.7181 | 9.4343  | -8.1774  | O.2  | 72 | CYS327 | -0.5679 |
| BACKBONE |         |         |          |      |    |        |         |
| 1112 CB  | -0.0220 | 9.2810  | -9.6139  | C.3  | 72 | CYS327 | -0.2413 |
| 1113 HB2 | -0.5067 | 10.2382 | -9.8059  | H    | 72 | CYS327 | 0.1122  |
| 1114 HB3 | 0.6117  | 9.0182  | -10.4610 | H    | 72 | CYS327 | 0.1122  |
| 1115 SG  | 1.0169  | 9.4487  | -8.1525  | S.3  | 72 | CYS327 | -0.8844 |
| 1116 N   | -1.6800 | 7.7011  | -7.1739  | N.am | 73 | LYS328 | -0.3479 |
| BACKBONE |         |         |          |      |    |        |         |
| 1117 H   | -0.9531 | 7.0033  | -7.2425  | H    | 73 | LYS328 | 0.2747  |
| 1118 CA  | -2.4495 | 7.8081  | -5.9396  | C.3  | 73 | LYS328 | -0.2400 |
| BACKBONE |         |         |          |      |    |        |         |
| 1119 HA  | -3.4604 | 8.0938  | -6.2304  | H    | 73 | LYS328 | 0.1426  |
| 1120 C   | -1.9396 | 8.9046  | -5.0131  | C.2  | 73 | LYS328 | 0.7341  |
| BACKBONE |         |         |          |      |    |        |         |
| 1121 O   | -2.6984 | 9.4046  | -4.1794  | O.2  | 73 | LYS328 | -0.5894 |
| BACKBONE |         |         |          |      |    |        |         |
| 1122 CB  | -2.5090 | 6.4605  | -5.2117  | C.3  | 73 | LYS328 | -0.0094 |
| 1123 HB2 | -1.4937 | 6.1668  | -4.9456  | H    | 73 | LYS328 | 0.0362  |
| 1124 HB3 | -3.1010 | 6.5840  | -4.3048  | H    | 73 | LYS328 | 0.0362  |
| 1125 CG  | -3.1360 | 5.3375  | -6.0530  | C.3  | 73 | LYS328 | 0.0187  |
| 1126 HG2 | -2.4733 | 5.1095  | -6.8879  | H    | 73 | LYS328 | 0.0103  |
| 1127 HG3 | -3.2523 | 4.4514  | -5.4290  | H    | 73 | LYS328 | 0.0103  |
| 1128 CD  | -4.5018 | 5.7390  | -6.6013  | C.3  | 73 | LYS328 | -0.0479 |
| 1129 HD2 | -4.3988 | 6.6632  | -7.1700  | H    | 73 | LYS328 | 0.0621  |
| 1130 HD3 | -5.1860 | 5.8995  | -5.7682  | H    | 73 | LYS328 | 0.0621  |
| 1131 CE  | -5.0697 | 4.6604  | -7.5078  | C.3  | 73 | LYS328 | -0.0143 |
| 1132 HE2 | -4.9222 | 3.6901  | -7.0336  | H    | 73 | LYS328 | 0.1135  |
| 1133 HE3 | -4.5372 | 4.6850  | -8.4585  | H    | 73 | LYS328 | 0.1135  |
| 1134 NZ  | -6.5336 | 4.8521  | -7.7694  | N.4  | 73 | LYS328 | -0.3854 |
| 1135 HZ3 | -7.0384 | 4.8243  | -6.8950  | H    | 73 | LYS328 | 0.3400  |
| 1136 HZ1 | -6.8668 | 4.1150  | -8.3741  | H    | 73 | LYS328 | 0.3400  |
| 1137 HZ2 | -6.6817 | 5.7462  | -8.2153  | H    | 73 | LYS328 | 0.3400  |
| 1138 N   | -0.6635 | 9.2704  | -5.1533  | N.am | 74 | TYR329 | -0.4157 |
| BACKBONE |         |         |          |      |    |        |         |
| 1139 H   | -0.0486 | 8.7255  | -5.7407  | H    | 74 | TYR329 | 0.2719  |
| 1140 CA  | -0.1474 | 10.4523 | -4.4646  | C.3  | 74 | TYR329 | -0.0014 |
| BACKBONE |         |         |          |      |    |        |         |
| 1141 HA  | -0.4010 | 10.3793 | -3.4070  | H    | 74 | TYR329 | 0.0876  |
| 1142 C   | -0.8008 | 11.7013 | -5.0585  | C.2  | 74 | TYR329 | 0.5973  |
| BACKBONE |         |         |          |      |    |        |         |

|           |         |         |          |      |           |         |
|-----------|---------|---------|----------|------|-----------|---------|
| 1143 O    | -1.2381 | 12.5938 | -4.3274  | O.2  | 74 TYR329 | -0.5679 |
| BACKBONE  |         |         |          |      |           |         |
| 1144 CB   | 1.3826  | 10.5357 | -4.5363  | C.3  | 74 TYR329 | -0.0152 |
| 1145 HB2  | 1.7997  | 9.6475  | -4.0617  | H    | 74 TYR329 | 0.0295  |
| 1146 HB3  | 1.6787  | 10.5603 | -5.5849  | H    | 74 TYR329 | 0.0295  |
| 1147 CG   | 1.9527  | 11.7650 | -3.8450  | C.ar | 74 TYR329 | -0.0011 |
| 1148 CD1  | 1.8711  | 11.9114 | -2.4569  | C.ar | 74 TYR329 | -0.1906 |
| 1149 HD1  | 1.4008  | 11.1369 | -1.8691  | H    | 74 TYR329 | 0.1699  |
| 1150 CD2  | 2.5515  | 12.7877 | -4.5815  | C.ar | 74 TYR329 | -0.1906 |
| 1151 HD2  | 2.6166  | 12.7012 | -5.6561  | H    | 74 TYR329 | 0.1699  |
| 1152 CE1  | 2.3861  | 13.0396 | -1.8164  | C.ar | 74 TYR329 | -0.2341 |
| 1153 HE1  | 2.3188  | 13.1355 | -0.7428  | H    | 74 TYR329 | 0.1656  |
| 1154 CE2  | 3.0682  | 13.9219 | -3.9504  | C.ar | 74 TYR329 | -0.2341 |
| 1155 HE2  | 3.5298  | 14.7047 | -4.5339  | H    | 74 TYR329 | 0.1656  |
| 1156 CZ   | 2.9856  | 14.0374 | -2.5729  | C.ar | 74 TYR329 | 0.3226  |
| 1157 OH   | 3.4930  | 15.1606 | -1.9582  | O.3  | 74 TYR329 | -0.5579 |
| 1158 HH   | 3.8822  | 15.8071 | -2.5516  | H    | 74 TYR329 | 0.3992  |
| 1159 N    | -0.8793 | 11.7400 | -6.3860  | N.am | 75 LEU330 | -0.4157 |
| BACKBONE  |         |         |          |      |           |         |
| 1160 H    | -0.4361 | 11.0050 | -6.9184  | H    | 75 LEU330 | 0.2719  |
| 1161 CA   | -1.5797 | 12.8008 | -7.1061  | C.3  | 75 LEU330 | -0.0518 |
| BACKBONE  |         |         |          |      |           |         |
| 1162 HA   | -1.1025 | 13.7514 | -6.8677  | H    | 75 LEU330 | 0.0922  |
| 1163 C    | -3.0462 | 12.9021 | -6.6641  | C.2  | 75 LEU330 | 0.5973  |
| BACKBONE  |         |         |          |      |           |         |
| 1164 O    | -3.5440 | 13.9988 | -6.3867  | O.2  | 75 LEU330 | -0.5679 |
| BACKBONE  |         |         |          |      |           |         |
| 1165 CB   | -1.4781 | 12.5611 | -8.6183  | C.3  | 75 LEU330 | -0.1102 |
| 1166 HB2  | -0.4276 | 12.6715 | -8.8874  | H    | 75 LEU330 | 0.0457  |
| 1167 HB3  | -1.7933 | 11.5334 | -8.7987  | H    | 75 LEU330 | 0.0457  |
| 1168 CG   | -2.2797 | 13.4483 | -9.5761  | C.3  | 75 LEU330 | 0.3531  |
| 1169 HG   | -3.3038 | 13.5139 | -9.2085  | H    | 75 LEU330 | -0.0361 |
| 1170 CD1  | -1.7274 | 14.8671 | -9.6193  | C.3  | 75 LEU330 | -0.4121 |
| 1171 HD11 | -0.7001 | 14.8462 | -9.9832  | H    | 75 LEU330 | 0.1000  |
| 1172 HD12 | -1.7492 | 15.2962 | -8.6174  | H    | 75 LEU330 | 0.1000  |
| 1173 HD13 | -2.3375 | 15.4744 | -10.2879 | H    | 75 LEU330 | 0.1000  |
| 1174 CD2  | -2.2892 | 12.8279 | -10.9618 | C.3  | 75 LEU330 | -0.4121 |
| 1175 HD21 | -1.2678 | 12.7591 | -11.3361 | H    | 75 LEU330 | 0.1000  |
| 1176 HD22 | -2.8815 | 13.4488 | -11.6339 | H    | 75 LEU330 | 0.1000  |
| 1177 HD23 | -2.7252 | 11.8302 | -10.9102 | H    | 75 LEU330 | 0.1000  |
| 1178 N    | -3.7234 | 11.7575 | -6.5886  | N.am | 76 LEU331 | -0.4157 |
| BACKBONE  |         |         |          |      |           |         |
| 1179 H    | -3.2634 | 10.8979 | -6.8527  | H    | 76 LEU331 | 0.2719  |
| 1180 CA   | -5.1116 | 11.7080 | -6.1351  | C.3  | 76 LEU331 | -0.0518 |
| BACKBONE  |         |         |          |      |           |         |
| 1181 HA   | -5.6960 | 12.3274 | -6.8156  | H    | 76 LEU331 | 0.0922  |
| 1182 C    | -5.2856 | 12.2982 | -4.7286  | C.2  | 76 LEU331 | 0.5973  |
| BACKBONE  |         |         |          |      |           |         |
| 1183 O    | -6.1700 | 13.1316 | -4.5060  | O.2  | 76 LEU331 | -0.5679 |
| BACKBONE  |         |         |          |      |           |         |
| 1184 CB   | -5.6441 | 10.2712 | -6.1902  | C.3  | 76 LEU331 | -0.1102 |
| 1185 HB2  | -5.4893 | 9.9064  | -7.2057  | H    | 76 LEU331 | 0.0457  |

|          |      |         |         |         |       |    |        |         |
|----------|------|---------|---------|---------|-------|----|--------|---------|
| 1186     | HB3  | -5.0490 | 9.6776  | -5.4963 | H     | 76 | LEU331 | 0.0457  |
| 1187     | CG   | -7.1183 | 10.0387 | -5.8416 | C.3   | 76 | LEU331 | 0.3531  |
| 1188     | HG   | -7.3036 | 10.4310 | -4.8417 | H     | 76 | LEU331 | -0.0361 |
| 1189     | CD1  | -8.0397 | 10.7923 | -6.8066 | C.3   | 76 | LEU331 | -0.4121 |
| 1190     | HD11 | -7.8819 | 10.4254 | -7.8208 | H     | 76 | LEU331 | 0.1000  |
| 1191     | HD12 | -7.8144 | 11.8580 | -6.7666 | H     | 76 | LEU331 | 0.1000  |
| 1192     | HD13 | -9.0784 | 10.6296 | -6.5190 | H     | 76 | LEU331 | 0.1000  |
| 1193     | CD2  | -7.4262 | 8.5455  | -5.8405 | C.3   | 76 | LEU331 | -0.4121 |
| 1194     | HD21 | -7.2459 | 8.1366  | -6.8347 | H     | 76 | LEU331 | 0.1000  |
| 1195     | HD22 | -8.4699 | 8.3899  | -5.5675 | H     | 76 | LEU331 | 0.1000  |
| 1196     | HD23 | -6.7829 | 8.0425  | -5.1186 | H     | 76 | LEU331 | 0.1000  |
| 1197     | N    | -4.4355 | 11.8741 | -3.7971 | N.am  | 77 | GLU332 | -0.5163 |
| BACKBONE |      |         |         |         |       |    |        |         |
| 1198     | H    | -3.7169 | 11.2139 | -4.0575 | H     | 77 | GLU332 | 0.2936  |
| 1199     | CA   | -4.5052 | 12.3324 | -2.4019 | C.3   | 77 | GLU332 | 0.0397  |
| BACKBONE |      |         |         |         |       |    |        |         |
| 1200     | HA   | -5.5162 | 12.1310 | -2.0478 | H     | 77 | GLU332 | 0.1105  |
| 1201     | C    | -4.2790 | 13.8431 | -2.2671 | C.2   | 77 | GLU332 | 0.5366  |
| BACKBONE |      |         |         |         |       |    |        |         |
| 1202     | O    | -5.0231 | 14.5287 | -1.5605 | O.2   | 77 | GLU332 | -0.5819 |
| BACKBONE |      |         |         |         |       |    |        |         |
| 1203     | CB   | -3.5023 | 11.5595 | -1.5378 | C.3   | 77 | GLU332 | 0.0560  |
| 1204     | HB2  | -3.6120 | 10.4972 | -1.7557 | H     | 77 | GLU332 | -0.0173 |
| 1205     | HB3  | -2.4976 | 11.8841 | -1.8085 | H     | 77 | GLU332 | -0.0173 |
| 1206     | CG   | -3.6805 | 11.7599 | -0.0332 | C.3   | 77 | GLU332 | 0.0136  |
| 1207     | HG2  | -4.7203 | 11.5550 | 0.2216  | H     | 77 | GLU332 | -0.0425 |
| 1208     | HG3  | -3.4449 | 12.7966 | 0.2074  | H     | 77 | GLU332 | -0.0425 |
| 1209     | CD   | -2.7903 | 10.8551 | 0.8082  | C.2   | 77 | GLU332 | 0.8054  |
| 1210     | OE1  | -2.0061 | 10.0625 | 0.2348  | O.co2 | 77 | GLU332 | -0.8188 |
| 1211     | OE2  | -2.8784 | 10.9360 | 2.0556  | O.co2 | 77 | GLU332 | -0.8188 |
| 1212     | N    | -3.2667 | 14.3535 | -2.9647 | N.am  | 78 | GLN333 | -0.4157 |
| BACKBONE |      |         |         |         |       |    |        |         |
| 1213     | H    | -2.7704 | 13.7565 | -3.6108 | H     | 78 | GLN333 | 0.2719  |
| 1214     | CA   | -2.8475 | 15.7486 | -2.8289 | C.3   | 78 | GLN333 | -0.0031 |
| BACKBONE |      |         |         |         |       |    |        |         |
| 1215     | HA   | -2.9556 | 15.9897 | -1.7715 | H     | 78 | GLN333 | 0.0850  |
| 1216     | C    | -3.7220 | 16.7356 | -3.5947 | C.2   | 78 | GLN333 | 0.5973  |
| BACKBONE |      |         |         |         |       |    |        |         |
| 1217     | O    | -3.9616 | 17.8530 | -3.1219 | O.2   | 78 | GLN333 | -0.5679 |
| BACKBONE |      |         |         |         |       |    |        |         |
| 1218     | CB   | -1.3937 | 15.9078 | -3.2752 | C.3   | 78 | GLN333 | -0.0036 |
| 1219     | HB2  | -1.3081 | 15.5423 | -4.2984 | H     | 78 | GLN333 | 0.0171  |
| 1220     | HB3  | -1.1409 | 16.9677 | -3.2456 | H     | 78 | GLN333 | 0.0171  |
| 1221     | CG   | -0.3935 | 15.1549 | -2.4146 | C.3   | 78 | GLN333 | -0.0645 |
| 1222     | HG2  | 0.5934  | 15.2438 | -2.8688 | H     | 78 | GLN333 | 0.0352  |
| 1223     | HG3  | -0.6843 | 14.1050 | -2.3802 | H     | 78 | GLN333 | 0.0352  |
| 1224     | CD   | -0.3238 | 15.6838 | -0.9999 | C.2   | 78 | GLN333 | 0.6951  |
| 1225     | NE2  | -0.0469 | 16.8614 | -0.7782 | N.am  | 78 | GLN333 | -0.9407 |
| 1226     | HE22 | 0.1360  | 17.4906 | -1.5468 | H     | 78 | GLN333 | 0.4251  |
| 1227     | HE21 | -0.0023 | 17.1993 | 0.1726  | H     | 78 | GLN333 | 0.4251  |
| 1228     | OE1  | -0.5721 | 14.8165 | -0.0356 | O.2   | 78 | GLN333 | -0.6086 |

|          |          |         |          |      |    |        |         |
|----------|----------|---------|----------|------|----|--------|---------|
| 1229 N   | -4.1849  | 16.3328 | -4.7768  | N.am | 79 | LYS334 | -0.3479 |
| BACKBONE |          |         |          |      |    |        |         |
| 1230 H   | -4.0423  | 15.3746 | -5.0625  | H    | 79 | LYS334 | 0.2747  |
| 1231 CA  | -4.8960  | 17.2483 | -5.6712  | C.3  | 79 | LYS334 | -0.2400 |
| BACKBONE |          |         |          |      |    |        |         |
| 1232 HA  | -4.8380  | 18.2199 | -5.1804  | H    | 79 | LYS334 | 0.1426  |
| 1233 C   | -6.3812  | 16.9425 | -5.8412  | C.2  | 79 | LYS334 | 0.7341  |
| BACKBONE |          |         |          |      |    |        |         |
| 1234 O   | -7.1731  | 17.8536 | -6.0924  | O.2  | 79 | LYS334 | -0.5894 |
| BACKBONE |          |         |          |      |    |        |         |
| 1235 CB  | -4.2189  | 17.3085 | -7.0491  | C.3  | 79 | LYS334 | -0.0094 |
| 1236 HB2 | -4.3255  | 16.3309 | -7.5194  | H    | 79 | LYS334 | 0.0362  |
| 1237 HB3 | -4.7380  | 18.0578 | -7.6467  | H    | 79 | LYS334 | 0.0362  |
| 1238 CG  | -2.7257  | 17.6663 | -7.0328  | C.3  | 79 | LYS334 | 0.0187  |
| 1239 HG2 | -2.1905  | 16.8994 | -6.4728  | H    | 79 | LYS334 | 0.0103  |
| 1240 HG3 | -2.3618  | 17.6867 | -8.0600  | H    | 79 | LYS334 | 0.0103  |
| 1241 CD  | -2.4447  | 19.0305 | -6.3865  | C.3  | 79 | LYS334 | -0.0479 |
| 1242 HD2 | -1.3754  | 19.1132 | -6.1923  | H    | 79 | LYS334 | 0.0621  |
| 1243 HD3 | -2.9907  | 19.0920 | -5.4452  | H    | 79 | LYS334 | 0.0621  |
| 1244 CE  | -2.8705  | 20.1843 | -7.2742  | C.3  | 79 | LYS334 | -0.0143 |
| 1245 HE2 | -3.9507  | 20.1439 | -7.4148  | H    | 79 | LYS334 | 0.1135  |
| 1246 HE3 | -2.3747  | 20.0903 | -8.2403  | H    | 79 | LYS334 | 0.1135  |
| 1247 NZ  | -2.5097  | 21.4942 | -6.6705  | N.4  | 79 | LYS334 | -0.3854 |
| 1248 HZ3 | -2.9695  | 21.5909 | -5.7763  | H    | 79 | LYS334 | 0.3400  |
| 1249 HZ1 | -2.8055  | 22.2404 | -7.2836  | H    | 79 | LYS334 | 0.3400  |
| 1250 HZ2 | -1.5091  | 21.5413 | -6.5414  | H    | 79 | LYS334 | 0.3400  |
| 1251 N   | -6.7527  | 15.6696 | -5.7291  | N.am | 80 | GLY335 | -0.4157 |
| BACKBONE |          |         |          |      |    |        |         |
| 1252 H   | -6.0487  | 14.9663 | -5.5569  | H    | 80 | GLY335 | 0.2719  |
| 1253 CA  | -8.1528  | 15.2602 | -5.8484  | C.3  | 80 | GLY335 | -0.0252 |
| BACKBONE |          |         |          |      |    |        |         |
| 1254 HA2 | -8.3193  | 14.4161 | -5.1792  | H    | 80 | GLY335 | 0.0698  |
| 1255 HA3 | -8.7800  | 16.0969 | -5.5408  | H    | 80 | GLY335 | 0.0698  |
| 1256 C   | -8.5682  | 14.8452 | -7.2480  | C.2  | 80 | GLY335 | 0.5973  |
| BACKBONE |          |         |          |      |    |        |         |
| 1257 O   | -7.9217  | 15.2083 | -8.2346  | O.2  | 80 | GLY335 | -0.5679 |
| BACKBONE |          |         |          |      |    |        |         |
| 1258 N   | -9.6606  | 14.0871 | -7.3235  | N.am | 81 | GLN336 | -0.4157 |
| BACKBONE |          |         |          |      |    |        |         |
| 1259 H   | -10.1543 | 13.8695 | -6.4697  | H    | 81 | GLN336 | 0.2719  |
| 1260 CA  | -10.1814 | 13.5531 | -8.5854  | C.3  | 81 | GLN336 | -0.0031 |
| BACKBONE |          |         |          |      |    |        |         |
| 1261 HA  | -9.3738  | 12.9806 | -9.0416  | H    | 81 | GLN336 | 0.0850  |
| 1262 C   | -10.5687 | 14.6466 | -9.5812  | C.2  | 81 | GLN336 | 0.5973  |
| BACKBONE |          |         |          |      |    |        |         |
| 1263 O   | -10.3300 | 14.5014 | -10.7779 | O.2  | 81 | GLN336 | -0.5679 |
| BACKBONE |          |         |          |      |    |        |         |
| 1264 CB  | -11.3818 | 12.6394 | -8.3164  | C.3  | 81 | GLN336 | -0.0036 |
| 1265 HB2 | -11.0948 | 11.9248 | -7.5451  | H    | 81 | GLN336 | 0.0171  |
| 1266 HB3 | -12.2011 | 13.2587 | -7.9512  | H    | 81 | GLN336 | 0.0171  |
| 1267 CG  | -11.8890 | 11.8496 | -9.5288  | C.3  | 81 | GLN336 | -0.0645 |
| 1268 HG2 | -11.0854 | 11.2049 | -9.8849  | H    | 81 | GLN336 | 0.0352  |

|          |      |          |         |          |       |    |        |         |
|----------|------|----------|---------|----------|-------|----|--------|---------|
| 1269     | HG3  | -12.1637 | 12.5547 | -10.3132 | H     | 81 | GLN336 | 0.0352  |
| 1270     | CD   | -13.1056 | 10.9802 | -9.2057  | C.2   | 81 | GLN336 | 0.6951  |
| 1271     | NE2  | -13.1437 | 10.2972 | -8.1802  | N.am  | 81 | GLN336 | -0.9407 |
| 1272     | HE22 | -12.3659 | 10.3095 | -7.5360  | H     | 81 | GLN336 | 0.4251  |
| 1273     | HE21 | -13.9528 | 9.7254  | -7.9842  | H     | 81 | GLN336 | 0.4251  |
| 1274     | OE1  | -14.0997 | 11.0031 | -10.0888 | O.2   | 81 | GLN336 | -0.6086 |
| 1275     | N    | -11.1675 | 15.7296 | -9.0850  | N.am  | 82 | GLU337 | -0.5163 |
| BACKBONE |      |          |         |          |       |    |        |         |
| 1276     | H    | -11.3005 | 15.8019 | -8.0864  | H     | 82 | GLU337 | 0.2936  |
| 1277     | CA   | -11.6409 | 16.8237 | -9.9500  | C.3   | 82 | GLU337 | 0.0397  |
| BACKBONE |      |          |         |          |       |    |        |         |
| 1278     | HA   | -12.2470 | 16.3481 | -10.7211 | H     | 82 | GLU337 | 0.1105  |
| 1279     | C    | -10.5087 | 17.5577 | -10.6628 | C.2   | 82 | GLU337 | 0.5366  |
| BACKBONE |      |          |         |          |       |    |        |         |
| 1280     | O    | -10.6463 | 17.9175 | -11.8262 | O.2   | 82 | GLU337 | -0.5819 |
| BACKBONE |      |          |         |          |       |    |        |         |
| 1281     | CB   | -12.5210 | 17.8171 | -9.1765  | C.3   | 82 | GLU337 | 0.0560  |
| 1282     | HB2  | -11.9772 | 18.1306 | -8.2855  | H     | 82 | GLU337 | -0.0173 |
| 1283     | HB3  | -12.7003 | 18.6816 | -9.8157  | H     | 82 | GLU337 | -0.0173 |
| 1284     | CG   | -13.8769 | 17.2592 | -8.7366  | C.3   | 82 | GLU337 | 0.0136  |
| 1285     | HG2  | -14.4752 | 18.0785 | -8.3378  | H     | 82 | GLU337 | -0.0425 |
| 1286     | HG3  | -13.7091 | 16.5181 | -7.9552  | H     | 82 | GLU337 | -0.0425 |
| 1287     | CD   | -14.6548 | 16.5990 | -9.8713  | C.2   | 82 | GLU337 | 0.8054  |
| 1288     | OE1  | -14.7720 | 17.2083 | -10.9606 | O.co2 | 82 | GLU337 | -0.8188 |
| 1289     | OE2  | -15.1502 | 15.4656 | -9.6707  | O.co2 | 82 | GLU337 | -0.8188 |
| 1290     | N    | -9.3994  | 17.7723 | -9.9595  | N.am  | 83 | TYR338 | -0.4157 |
| BACKBONE |      |          |         |          |       |    |        |         |
| 1291     | H    | -9.3815  | 17.5041 | -8.9860  | H     | 83 | TYR338 | 0.2719  |
| 1292     | CA   | -8.2024  | 18.3835 | -10.5455 | C.3   | 83 | TYR338 | -0.0014 |
| BACKBONE |      |          |         |          |       |    |        |         |
| 1293     | HA   | -8.4844  | 19.3693 | -10.9154 | H     | 83 | TYR338 | 0.0876  |
| 1294     | C    | -7.6727  | 17.5592 | -11.7276 | C.2   | 83 | TYR338 | 0.5973  |
| BACKBONE |      |          |         |          |       |    |        |         |
| 1295     | O    | -7.3944  | 18.1005 | -12.8092 | O.2   | 83 | TYR338 | -0.5679 |
| BACKBONE |      |          |         |          |       |    |        |         |
| 1296     | CB   | -7.1003  | 18.5359 | -9.4820  | C.3   | 83 | TYR338 | -0.0152 |
| 1297     | HB2  | -7.4454  | 19.2431 | -8.7277  | H     | 83 | TYR338 | 0.0295  |
| 1298     | HB3  | -6.9321  | 17.5637 | -9.0187  | H     | 83 | TYR338 | 0.0295  |
| 1299     | CG   | -5.7825  | 19.0351 | -10.0386 | C.ar  | 83 | TYR338 | -0.0011 |
| 1300     | CD1  | -5.5472  | 20.4018 | -10.1956 | C.ar  | 83 | TYR338 | -0.1906 |
| 1301     | HD1  | -6.3124  | 21.1087 | -9.9106  | H     | 83 | TYR338 | 0.1699  |
| 1302     | CD2  | -4.7742  | 18.1430 | -10.4207 | C.ar  | 83 | TYR338 | -0.1906 |
| 1303     | HD2  | -4.9373  | 17.0807 | -10.3148 | H     | 83 | TYR338 | 0.1699  |
| 1304     | CE1  | -4.3411  | 20.8694 | -10.7140 | C.ar  | 83 | TYR338 | -0.2341 |
| 1305     | HE1  | -4.1745  | 21.9303 | -10.8286 | H     | 83 | TYR338 | 0.1656  |
| 1306     | CE2  | -3.5636  | 18.6018 | -10.9354 | C.ar  | 83 | TYR338 | -0.2341 |
| 1307     | HE2  | -2.7922  | 17.9008 | -11.2184 | H     | 83 | TYR338 | 0.1656  |
| 1308     | CZ   | -3.3563  | 19.9657 | -11.0819 | C.ar  | 83 | TYR338 | 0.3226  |
| 1309     | OH   | -2.1663  | 20.4333 | -11.5898 | O.3   | 83 | TYR338 | -0.5579 |
| 1310     | HH   | -2.1022  | 21.3887 | -11.6592 | H     | 83 | TYR338 | 0.3992  |
| 1311     | N    | -7.5309  | 16.2552 | -11.5047 | N.am  | 84 | ILE339 | -0.4157 |
| BACKBONE |      |          |         |          |       |    |        |         |

|           |          |         |               |           |         |
|-----------|----------|---------|---------------|-----------|---------|
| 1312 H    | -7.7839  | 15.8914 | -10.5972 H    | 84 ILE339 | 0.2719  |
| 1313 CA   | -7.0246  | 15.3218 | -12.5156 C.3  | 84 ILE339 | -0.0597 |
| BACKBONE  |          |         |               |           |         |
| 1314 HA   | -6.0471  | 15.6915 | -12.8252 H    | 84 ILE339 | 0.0869  |
| 1315 C    | -7.9605  | 15.2651 | -13.7252 C.2  | 84 ILE339 | 0.5973  |
| BACKBONE  |          |         |               |           |         |
| 1316 O    | -7.5178  | 15.4029 | -14.8680 O.2  | 84 ILE339 | -0.5679 |
| BACKBONE  |          |         |               |           |         |
| 1317 CB   | -6.8655  | 13.8891 | -11.9386 C.3  | 84 ILE339 | 0.1303  |
| 1318 HB   | -7.8419  | 13.5478 | -11.5946 H    | 84 ILE339 | 0.0187  |
| 1319 CG1  | -5.9212  | 13.8880 | -10.7330 C.3  | 84 ILE339 | -0.0430 |
| 1320 HG12 | -4.9005  | 14.0072 | -11.0967 H    | 84 ILE339 | 0.0236  |
| 1321 HG13 | -6.1800  | 14.7320 | -10.0937 H    | 84 ILE339 | 0.0236  |
| 1322 CG2  | -6.3813  | 12.9177 | -13.0265 C.3  | 84 ILE339 | -0.3204 |
| 1323 HG21 | -5.4041  | 13.2365 | -13.3892 H    | 84 ILE339 | 0.0882  |
| 1324 HG22 | -7.0922  | 12.9140 | -13.8528 H    | 84 ILE339 | 0.0882  |
| 1325 HG23 | -6.3041  | 11.9138 | -12.6090 H    | 84 ILE339 | 0.0882  |
| 1326 CD1  | -5.9867  | 12.6185 | -9.8991 C.3   | 84 ILE339 | -0.0660 |
| 1327 HD11 | -5.7306  | 11.7613 | -10.5217 H    | 84 ILE339 | 0.0186  |
| 1328 HD12 | -6.9957  | 12.4937 | -9.5061 H     | 84 ILE339 | 0.0186  |
| 1329 HD13 | -5.2809  | 12.6905 | -9.0716 H     | 84 ILE339 | 0.0186  |
| 1330 N    | -9.2502  | 15.0711 | -13.4570 N.am | 85 ASN340 | -0.4157 |
| BACKBONE  |          |         |               |           |         |
| 1331 H    | -9.5426  | 14.9927 | -12.4934 H    | 85 ASN340 | 0.2719  |
| 1332 CA   | -10.2588 | 14.9676 | -14.5146 C.3  | 85 ASN340 | 0.0143  |
| BACKBONE  |          |         |               |           |         |
| 1333 HA   | -9.9117  | 14.1969 | -15.2028 H    | 85 ASN340 | 0.1048  |
| 1334 C    | -10.4002 | 16.2588 | -15.3226 C.2  | 85 ASN340 | 0.5973  |
| BACKBONE  |          |         |               |           |         |
| 1335 O    | -10.5104 | 16.2111 | -16.5421 O.2  | 85 ASN340 | -0.5679 |
| BACKBONE  |          |         |               |           |         |
| 1336 CB   | -11.6152 | 14.5458 | -13.9351 C.3  | 85 ASN340 | -0.2041 |
| 1337 HB2  | -12.3692 | 14.6296 | -14.7177 H    | 85 ASN340 | 0.0797  |
| 1338 HB3  | -11.8670 | 15.2175 | -13.1145 H    | 85 ASN340 | 0.0797  |
| 1339 CG   | -11.6157 | 13.1131 | -13.4095 C.2  | 85 ASN340 | 0.7130  |
| 1340 OD1  | -10.6428 | 12.3670 | -13.5739 O.2  | 85 ASN340 | -0.5931 |
| 1341 ND2  | -12.7121 | 12.7270 | -12.7688 N.am | 85 ASN340 | -0.9191 |
| 1342 HD22 | -13.4839 | 13.3687 | -12.6568 H    | 85 ASN340 | 0.4196  |
| 1343 HD21 | -12.7745 | 11.7915 | -12.3932 H    | 85 ASN340 | 0.4196  |
| 1344 N    | -10.3746 | 17.4027 | -14.6420 N.am | 86 ASN341 | -0.4157 |
| BACKBONE  |          |         |               |           |         |
| 1345 H    | -10.2807 | 17.3726 | -13.6369 H    | 86 ASN341 | 0.2719  |
| 1346 CA   | -10.4787 | 18.7051 | -15.3081 C.3  | 86 ASN341 | 0.0143  |
| BACKBONE  |          |         |               |           |         |
| 1347 HA   | -11.3766 | 18.6546 | -15.9239 H    | 86 ASN341 | 0.1048  |
| 1348 C    | -9.3210  | 18.9960 | -16.2614 C.2  | 86 ASN341 | 0.5973  |
| BACKBONE  |          |         |               |           |         |
| 1349 O    | -9.5053  | 19.6658 | -17.2761 O.2  | 86 ASN341 | -0.5679 |
| BACKBONE  |          |         |               |           |         |
| 1350 CB   | -10.6402 | 19.8385 | -14.2855 C.3  | 86 ASN341 | -0.2041 |
| 1351 HB2  | -10.2840 | 20.7657 | -14.7343 H    | 86 ASN341 | 0.0797  |
| 1352 HB3  | -10.0372 | 19.6044 | -13.4082 H    | 86 ASN341 | 0.0797  |

|          |      |          |         |          |       |    |        |         |
|----------|------|----------|---------|----------|-------|----|--------|---------|
| 1353     | CG   | -12.0904 | 20.0361 | -13.8425 | C.2   | 86 | ASN341 | 0.7130  |
| 1354     | ND2  | -12.3533 | 20.6102 | -12.7801 | N.am  | 86 | ASN341 | -0.9191 |
| 1355     | HD22 | -11.6063 | 20.9486 | -12.1906 | H     | 86 | ASN341 | 0.4196  |
| 1356     | HD21 | -13.3152 | 20.7409 | -12.5014 | H     | 86 | ASN341 | 0.4196  |
| 1357     | OD1  | -13.0363 | 19.5701 | -14.6575 | O.2   | 86 | ASN341 | -0.5931 |
| 1358     | N    | -8.1331  | 18.4907 | -15.9336 | N.am  | 87 | ILE342 | -0.4157 |
| BACKBONE |      |          |         |          |       |    |        |         |
| 1359     | H    | -8.0258  | 18.0399 | -15.0362 | H     | 87 | ILE342 | 0.2719  |
| 1360     | CA   | -6.9753  | 18.5664 | -16.8311 | C.3   | 87 | ILE342 | -0.0597 |
| BACKBONE |      |          |         |          |       |    |        |         |
| 1361     | HA   | -6.8428  | 19.6089 | -17.1203 | H     | 87 | ILE342 | 0.0869  |
| 1362     | C    | -7.2212  | 17.7537 | -18.1097 | C.2   | 87 | ILE342 | 0.5973  |
| BACKBONE |      |          |         |          |       |    |        |         |
| 1363     | O    | -6.8432  | 18.1717 | -19.2072 | O.2   | 87 | ILE342 | -0.5679 |
| BACKBONE |      |          |         |          |       |    |        |         |
| 1364     | CB   | -5.6682  | 18.1193 | -16.1115 | C.3   | 87 | ILE342 | 0.1303  |
| 1365     | HB   | -5.9085  | 17.2881 | -15.4484 | H     | 87 | ILE342 | 0.0187  |
| 1366     | CG1  | -5.1168  | 19.2856 | -15.2787 | C.3   | 87 | ILE342 | -0.0430 |
| 1367     | HG12 | -4.8822  | 20.1054 | -15.9577 | H     | 87 | ILE342 | 0.0236  |
| 1368     | HG13 | -5.8935  | 19.6014 | -14.5823 | H     | 87 | ILE342 | 0.0236  |
| 1369     | CG2  | -4.6124  | 17.5977 | -17.1066 | C.3   | 87 | ILE342 | -0.3204 |
| 1370     | HG21 | -4.3370  | 18.3960 | -17.7957 | H     | 87 | ILE342 | 0.0882  |
| 1371     | HG22 | -5.0250  | 16.7594 | -17.6680 | H     | 87 | ILE342 | 0.0882  |
| 1372     | HG23 | -3.7287  | 17.2689 | -16.5596 | H     | 87 | ILE342 | 0.0882  |
| 1373     | CD1  | -3.8801  | 18.9674 | -14.4859 | C.3   | 87 | ILE342 | -0.0660 |
| 1374     | HD11 | -3.0871  | 18.6482 | -15.1623 | H     | 87 | ILE342 | 0.0186  |
| 1375     | HD12 | -4.0980  | 18.1675 | -13.7783 | H     | 87 | ILE342 | 0.0186  |
| 1376     | HD13 | -3.5584  | 19.8557 | -13.9424 | H     | 87 | ILE342 | 0.0186  |
| 1377     | N    | -7.8797  | 16.6101 | -17.9564 | N.am  | 88 | HIS343 | -0.4157 |
| BACKBONE |      |          |         |          |       |    |        |         |
| 1378     | H    | -8.2331  | 16.3649 | -17.0425 | H     | 88 | HIS343 | 0.2719  |
| 1379     | CA   | -8.1061  | 15.6981 | -19.0743 | C.3   | 88 | HIS343 | -0.0581 |
| BACKBONE |      |          |         |          |       |    |        |         |
| 1380     | HA   | -7.3465  | 15.9380 | -19.8183 | H     | 88 | HIS343 | 0.1360  |
| 1381     | C    | -9.4274  | 15.9002 | -19.8114 | C.2   | 88 | HIS343 | 0.5973  |
| BACKBONE |      |          |         |          |       |    |        |         |
| 1382     | O    | -9.5614  | 15.5051 | -20.9729 | O.2   | 88 | HIS343 | -0.5679 |
| BACKBONE |      |          |         |          |       |    |        |         |
| 1383     | CB   | -7.9362  | 14.2567 | -18.6110 | C.3   | 88 | HIS343 | -0.0074 |
| 1384     | HB2  | -8.3093  | 13.5945 | -19.3923 | H     | 88 | HIS343 | 0.0367  |
| 1385     | HB3  | -8.5211  | 14.1126 | -17.7026 | H     | 88 | HIS343 | 0.0367  |
| 1386     | CG   | -6.5144  | 13.8997 | -18.3233 | C.2   | 88 | HIS343 | 0.1868  |
| 1387     | ND1  | -5.5878  | 13.6863 | -19.3220 | N.2   | 88 | HIS343 | -0.5432 |
| 1388     | CD2  | -5.8487  | 13.7526 | -17.1531 | C.2   | 88 | HIS343 | -0.2207 |
| 1389     | HD2  | -6.2618  | 13.8619 | -16.1612 | H     | 88 | HIS343 | 0.1862  |
| 1390     | CE1  | -4.4156  | 13.4060 | -18.7796 | C.2   | 88 | HIS343 | 0.1635  |
| 1391     | HE1  | -3.5053  | 13.1882 | -19.3185 | H     | 88 | HIS343 | 0.1435  |
| 1392     | NE2  | -4.5474  | 13.4379 | -17.4666 | N.p13 | 88 | HIS343 | -0.2795 |
| 1393     | HE2  | -3.8106  | 13.2596 | -16.7992 | H     | 88 | HIS343 | 0.3339  |
| 1394     | N    | -10.3956 | 16.5098 | -19.1368 | N.am  | 89 | LEU344 | -0.4157 |
| BACKBONE |      |          |         |          |       |    |        |         |
| 1395     | H    | -10.2651 | 16.7055 | -18.1546 | H     | 89 | LEU344 | 0.2719  |



|           |          |         |          |      |    |        |         |
|-----------|----------|---------|----------|------|----|--------|---------|
| 1396 CA   | -11.6420 | 16.9026 | -19.7818 | C.3  | 89 | LEU344 | -0.0518 |
| BACKBONE  |          |         |          |      |    |        |         |
| 1397 HA   | -11.8273 | 16.2852 | -20.6608 | H    | 89 | LEU344 | 0.0922  |
| 1398 C    | -11.5063 | 18.3653 | -20.2129 | C.2  | 89 | LEU344 | 0.5973  |
| BACKBONE  |          |         |          |      |    |        |         |
| 1399 O    | -11.8663 | 19.2868 | -19.4758 | O.2  | 89 | LEU344 | -0.5679 |
| BACKBONE  |          |         |          |      |    |        |         |
| 1400 CB   | -12.8450 | 16.6749 | -18.8525 | C.3  | 89 | LEU344 | -0.1102 |
| 1401 HB2  | -12.7605 | 17.3849 | -18.0298 | H    | 89 | LEU344 | 0.0457  |
| 1402 HB3  | -13.7460 | 16.8900 | -19.4270 | H    | 89 | LEU344 | 0.0457  |
| 1403 CG   | -13.0150 | 15.2751 | -18.2367 | C.3  | 89 | LEU344 | 0.3531  |
| 1404 HG   | -12.0645 | 15.0310 | -17.7621 | H    | 89 | LEU344 | -0.0361 |
| 1405 CD1  | -14.1060 | 15.2644 | -17.1674 | C.3  | 89 | LEU344 | -0.4121 |
| 1406 HD11 | -15.0653 | 15.5069 | -17.6247 | H    | 89 | LEU344 | 0.1000  |
| 1407 HD12 | -13.8713 | 16.0036 | -16.4015 | H    | 89 | LEU344 | 0.1000  |
| 1408 HD13 | -14.1598 | 14.2751 | -16.7131 | H    | 89 | LEU344 | 0.1000  |
| 1409 CD2  | -13.2852 | 14.2031 | -19.2894 | C.3  | 89 | LEU344 | -0.4121 |
| 1410 HD21 | -14.2314 | 14.4137 | -19.7879 | H    | 89 | LEU344 | 0.1000  |
| 1411 HD22 | -13.3375 | 13.2264 | -18.8082 | H    | 89 | LEU344 | 0.1000  |
| 1412 HD23 | -12.4796 | 14.2036 | -20.0237 | H    | 89 | LEU344 | 0.1000  |
| 1413 N    | -10.9547 | 18.5587 | -21.4092 | N.am | 90 | THR345 | -0.7301 |
| BACKBONE  |          |         |          |      |    |        |         |
| 1414 H    | -10.7380 | 17.7510 | -21.9755 | H    | 90 | THR345 | 0.3700  |
| 1415 CA   | -10.6471 | 19.8898 | -21.9431 | C.3  | 90 | THR345 | 0.2811  |
| BACKBONE  |          |         |          |      |    |        |         |
| 1416 HA   | -10.0811 | 20.3931 | -21.1592 | H    | 90 | THR345 | 0.0800  |
| 1417 C    | -11.8945 | 20.7427 | -22.2127 | C.2  | 90 | THR345 | 0.4490  |
| BACKBONE  |          |         |          |      |    |        |         |
| 1418 H    | -11.7859 | 21.8057 | -22.3694 | H    | 90 | THR345 | 0.0600  |
| 1419 O    | -13.0193 | 20.2362 | -22.2537 | O.2  | 90 | THR345 | -0.5700 |
| BACKBONE  |          |         |          |      |    |        |         |
| 1420 CB   | -9.7722  | 19.8020 | -23.2240 | C.3  | 90 | THR345 | 0.2000  |
| 1421 HB   | -8.9305  | 19.1441 | -23.0079 | H    | 90 | THR345 | 0.0800  |
| 1422 OG1  | -9.2985  | 21.1076 | -23.5792 | O.3  | 90 | THR345 | -0.6800 |
| 1423 HG1  | -8.7638  | 21.0168 | -24.3714 | H    | 90 | THR345 | 0.4000  |
| 1424 CG2  | -10.5560 | 19.2120 | -24.3998 | C.3  | 90 | THR345 | -0.2400 |
| 1425 HG21 | -11.4036 | 19.8569 | -24.6316 | H    | 90 | THR345 | 0.0800  |
| 1426 HG22 | -10.9173 | 18.2187 | -24.1335 | H    | 90 | THR345 | 0.0800  |
| 1427 HG23 | -9.9049  | 19.1403 | -25.2710 | H    | 90 | THR345 | 0.0800  |
| 1428 C    | 8.3416   | 16.6475 | -18.2357 | C.3  | 91 | <91>   | 0.0300  |
| 1429 C    | 8.2367   | 18.3180 | -21.6858 | C.3  | 91 | <91>   | -0.2400 |
| 1430 C    | 7.9733   | 17.2102 | -20.6578 | C.3  | 91 | <91>   | 0.2510  |
| 1431 C    | 8.2561   | 15.7827 | -21.2368 | C.2  | 91 | <91>   | 0.5690  |
| 1432 N    | 8.7081   | 17.5139 | -19.3854 | N.3  | 91 | <91>   | -0.9000 |
| 1433 O    | 7.5464   | 15.3088 | -22.1196 | O.2  | 91 | <91>   | -0.5700 |
| 1434 C    | 9.7796   | 13.7353 | -21.3667 | C.3  | 91 | <91>   | 0.2810  |
| 1435 C    | 9.8062   | 12.6463 | -20.2477 | C.2  | 91 | <91>   | 0.5690  |
| 1436 N    | 9.3442   | 15.0727 | -20.9312 | N.am | 91 | <91>   | -0.7300 |
| 1437 O    | 10.4585  | 12.8594 | -19.2269 | O.2  | 91 | <91>   | -0.5700 |
| 1438 C    | 11.0795  | 13.8046 | -22.1869 | C.3  | 91 | <91>   | -0.0160 |
| 1439 N    | 9.2210   | 11.4371 | -20.4140 | N.am | 91 | <91>   | -0.6600 |
| 1440 C    | 8.4256   | 11.1467 | -21.5979 | C.3  | 91 | <91>   | 0.1400  |

|      |   |         |         |          |      |         |         |
|------|---|---------|---------|----------|------|---------|---------|
| 1441 | C | 7.5395  | 9.9714  | -21.2048 | C.3  | 91 <91> | -0.1600 |
| 1442 | C | 8.4632  | 9.1888  | -20.2748 | C.3  | 91 <91> | -0.1600 |
| 1443 | C | 9.2059  | 10.2824 | -19.4929 | C.3  | 91 <91> | 0.2810  |
| 1444 | C | 10.5875 | 9.7577  | -18.9933 | C.2  | 91 <91> | 0.5690  |
| 1445 | N | 11.7322 | 10.2402 | -19.4692 | N.am | 91 <91> | -0.7300 |
| 1446 | C | 13.0891 | 9.8634  | -19.1131 | C.3  | 91 <91> | 0.3640  |
| 1447 | O | 10.6708 | 8.8465  | -18.1789 | O.2  | 91 <91> | -0.5700 |
| 1448 | C | 13.0090 | 9.3345  | -17.7119 | C.ar | 91 <91> | -0.1440 |
| 1449 | C | 12.8927 | 7.9636  | -17.7022 | C.ar | 91 <91> | -0.1440 |
| 1450 | C | 12.8796 | 7.3851  | -19.0894 | C.3  | 91 <91> | -0.0160 |
| 1451 | C | 13.4304 | 8.5801  | -19.9124 | C.3  | 91 <91> | -0.1600 |
| 1452 | C | 13.0281 | 10.0545 | -16.5177 | C.ar | 91 <91> | -0.1500 |
| 1453 | C | 12.9293 | 9.3771  | -15.2984 | C.ar | 91 <91> | -0.1500 |
| 1454 | C | 12.8090 | 7.9867  | -15.2802 | C.ar | 91 <91> | -0.1500 |
| 1455 | C | 12.7902 | 7.2982  | -16.4883 | C.ar | 91 <91> | 0.1900  |
| 1456 | F | 12.6684 | 5.9480  | -16.4747 | F    | 91 <91> | -0.1900 |
| 1457 | C | 10.7997 | 14.7280 | -23.3564 | C.ar | 91 <91> | -0.1440 |
| 1458 | C | 11.0871 | 16.0910 | -23.2499 | C.ar | 91 <91> | -0.1500 |
| 1459 | C | 10.8928 | 16.9352 | -24.3376 | C.ar | 91 <91> | -0.1500 |
| 1460 | C | 10.4146 | 16.4029 | -25.5293 | C.ar | 91 <91> | 0.0820  |
| 1461 | C | 10.0888 | 15.0530 | -25.6433 | C.ar | 91 <91> | -0.1500 |
| 1462 | C | 10.2891 | 14.2166 | -24.5505 | C.ar | 91 <91> | -0.1500 |
| 1463 | O | 10.0543 | 17.5084 | -26.3708 | O.3  | 91 <91> | -0.2660 |
| 1464 | S | 9.1629  | 18.8216 | -25.8835 | S.o2 | 91 <91> | 1.6830  |
| 1465 | O | 8.0672  | 18.3622 | -25.1193 | O.2  | 91 <91> | -0.6500 |
| 1466 | O | 8.7789  | 19.5906 | -27.0076 | O.2  | 91 <91> | -0.6500 |

@<TRIPOS>BOND

|    |    |    |    |                     |
|----|----|----|----|---------------------|
| 1  | 1  | 2  | 1  |                     |
| 2  | 1  | 3  | 1  |                     |
| 3  | 1  | 4  | 1  | BACKBONE            |
| 4  | 4  | 5  | 1  |                     |
| 5  | 4  | 6  | 1  | BACKBONE            |
| 6  | 4  | 8  | 1  |                     |
| 7  | 6  | 7  | 2  | BACKBONE            |
| 8  | 6  | 21 | am | BACKBONE   INTERRES |
| 9  | 8  | 9  | 1  |                     |
| 10 | 8  | 10 | 1  |                     |
| 11 | 8  | 11 | 1  |                     |
| 12 | 11 | 12 | 1  |                     |
| 13 | 11 | 13 | 1  |                     |
| 14 | 11 | 17 | 1  |                     |
| 15 | 13 | 14 | 1  |                     |
| 16 | 13 | 15 | 1  |                     |
| 17 | 13 | 16 | 1  |                     |
| 18 | 17 | 18 | 1  |                     |
| 19 | 17 | 19 | 1  |                     |
| 20 | 17 | 20 | 1  |                     |
| 21 | 21 | 22 | 1  | BACKBONE            |
| 22 | 21 | 32 | 1  |                     |
| 23 | 22 | 23 | 1  |                     |
| 24 | 22 | 24 | 1  | BACKBONE            |
| 25 | 22 | 26 | 1  |                     |

|    |    |    |    |                     |
|----|----|----|----|---------------------|
| 26 | 24 | 25 | 2  | BACKBONE            |
| 27 | 24 | 35 | am | BACKBONE   INTERRES |
| 28 | 26 | 27 | 1  |                     |
| 29 | 26 | 28 | 1  |                     |
| 30 | 26 | 29 | 1  |                     |
| 31 | 29 | 30 | 1  |                     |
| 32 | 29 | 31 | 1  |                     |
| 33 | 29 | 32 | 1  |                     |
| 34 | 32 | 33 | 1  |                     |
| 35 | 32 | 34 | 1  |                     |
| 36 | 35 | 36 | 1  |                     |
| 37 | 35 | 37 | 1  | BACKBONE            |
| 38 | 37 | 38 | 1  |                     |
| 39 | 37 | 39 | 1  | BACKBONE            |
| 40 | 37 | 41 | 1  |                     |
| 41 | 39 | 40 | 2  | BACKBONE            |
| 42 | 39 | 59 | am | BACKBONE   INTERRES |
| 43 | 41 | 42 | 1  |                     |
| 44 | 41 | 43 | 1  |                     |
| 45 | 41 | 44 | 1  |                     |
| 46 | 44 | 45 | 1  |                     |
| 47 | 44 | 46 | 1  |                     |
| 48 | 44 | 47 | 1  |                     |
| 49 | 47 | 48 | 1  |                     |
| 50 | 47 | 49 | 1  |                     |
| 51 | 47 | 50 | 1  |                     |
| 52 | 50 | 51 | 1  |                     |
| 53 | 50 | 52 | ar |                     |
| 54 | 52 | 53 | ar |                     |
| 55 | 52 | 56 | ar |                     |
| 56 | 53 | 54 | 1  |                     |
| 57 | 53 | 55 | 1  |                     |
| 58 | 56 | 57 | 1  |                     |
| 59 | 56 | 58 | 1  |                     |
| 60 | 59 | 60 | 1  |                     |
| 61 | 59 | 61 | 1  | BACKBONE            |
| 62 | 61 | 62 | 1  |                     |
| 63 | 61 | 63 | 1  | BACKBONE            |
| 64 | 61 | 65 | 1  |                     |
| 65 | 63 | 64 | 2  | BACKBONE            |
| 66 | 63 | 73 | am | BACKBONE   INTERRES |
| 67 | 65 | 66 | 1  |                     |
| 68 | 65 | 67 | 1  |                     |
| 69 | 65 | 68 | 1  |                     |
| 70 | 68 | 69 | 2  |                     |
| 71 | 68 | 70 | am |                     |
| 72 | 70 | 71 | 1  |                     |
| 73 | 70 | 72 | 1  |                     |
| 74 | 73 | 74 | 1  | BACKBONE            |
| 75 | 73 | 84 | 1  |                     |
| 76 | 74 | 75 | 1  |                     |
| 77 | 74 | 76 | 1  | BACKBONE            |

|     |     |     |    |                     |
|-----|-----|-----|----|---------------------|
| 78  | 74  | 78  | 1  |                     |
| 79  | 76  | 77  | 2  | BACKBONE            |
| 80  | 76  | 87  | am | BACKBONE   INTERRES |
| 81  | 78  | 79  | 1  |                     |
| 82  | 78  | 80  | 1  |                     |
| 83  | 78  | 81  | 1  |                     |
| 84  | 81  | 82  | 1  |                     |
| 85  | 81  | 83  | 1  |                     |
| 86  | 81  | 84  | 1  |                     |
| 87  | 84  | 85  | 1  |                     |
| 88  | 84  | 86  | 1  |                     |
| 89  | 87  | 88  | 1  |                     |
| 90  | 87  | 89  | 1  | BACKBONE            |
| 91  | 89  | 90  | 1  |                     |
| 92  | 89  | 91  | 1  | BACKBONE            |
| 93  | 89  | 93  | 1  |                     |
| 94  | 91  | 92  | 2  | BACKBONE            |
| 95  | 91  | 98  | am | BACKBONE   INTERRES |
| 96  | 93  | 94  | 1  |                     |
| 97  | 93  | 95  | 1  |                     |
| 98  | 93  | 96  | 1  |                     |
| 99  | 96  | 97  | 1  |                     |
| 100 | 98  | 99  | 1  |                     |
| 101 | 98  | 100 | 1  | BACKBONE            |
| 102 | 100 | 101 | 1  |                     |
| 103 | 100 | 102 | 1  | BACKBONE            |
| 104 | 100 | 104 | 1  |                     |
| 105 | 102 | 103 | 2  | BACKBONE            |
| 106 | 102 | 115 | am | BACKBONE   INTERRES |
| 107 | 104 | 105 | 1  |                     |
| 108 | 104 | 106 | 1  |                     |
| 109 | 104 | 107 | 1  |                     |
| 110 | 107 | 108 | 1  |                     |
| 111 | 107 | 109 | 1  |                     |
| 112 | 107 | 110 | 1  |                     |
| 113 | 110 | 111 | 1  |                     |
| 114 | 111 | 112 | 1  |                     |
| 115 | 111 | 113 | 1  |                     |
| 116 | 111 | 114 | 1  |                     |
| 117 | 115 | 116 | 1  |                     |
| 118 | 115 | 117 | 1  | BACKBONE            |
| 119 | 117 | 118 | 1  |                     |
| 120 | 117 | 119 | 1  | BACKBONE            |
| 121 | 117 | 121 | 1  |                     |
| 122 | 119 | 120 | 2  | BACKBONE            |
| 123 | 119 | 125 | am | BACKBONE   INTERRES |
| 124 | 121 | 122 | 1  |                     |
| 125 | 121 | 123 | 1  |                     |
| 126 | 121 | 124 | 1  |                     |
| 127 | 125 | 126 | 1  |                     |
| 128 | 125 | 127 | 1  | BACKBONE            |
| 129 | 127 | 128 | 1  |                     |

|     |     |     |    |                     |
|-----|-----|-----|----|---------------------|
| 130 | 127 | 129 | 1  | BACKBONE            |
| 131 | 127 | 131 | 1  |                     |
| 132 | 129 | 130 | 2  | BACKBONE            |
| 133 | 129 | 137 | am | BACKBONE   INTERRES |
| 134 | 131 | 132 | 1  |                     |
| 135 | 131 | 133 | 1  |                     |
| 136 | 131 | 134 | 1  |                     |
| 137 | 134 | 135 | ar |                     |
| 138 | 134 | 136 | ar |                     |
| 139 | 137 | 138 | 1  |                     |
| 140 | 137 | 139 | 1  | BACKBONE            |
| 141 | 139 | 140 | 1  |                     |
| 142 | 139 | 141 | 1  | BACKBONE            |
| 143 | 139 | 143 | 1  |                     |
| 144 | 141 | 142 | 2  | BACKBONE            |
| 145 | 141 | 158 | am | BACKBONE   INTERRES |
| 146 | 143 | 144 | 1  |                     |
| 147 | 143 | 145 | 1  |                     |
| 148 | 143 | 146 | 1  |                     |
| 149 | 146 | 147 | ar |                     |
| 150 | 146 | 149 | ar |                     |
| 151 | 147 | 148 | 1  |                     |
| 152 | 147 | 151 | ar |                     |
| 153 | 149 | 150 | 1  |                     |
| 154 | 149 | 153 | ar |                     |
| 155 | 151 | 152 | 1  |                     |
| 156 | 151 | 155 | ar |                     |
| 157 | 153 | 154 | 1  |                     |
| 158 | 153 | 155 | ar |                     |
| 159 | 155 | 156 | 1  |                     |
| 160 | 156 | 157 | 1  |                     |
| 161 | 158 | 159 | 1  |                     |
| 162 | 158 | 160 | 1  | BACKBONE            |
| 163 | 160 | 161 | 1  |                     |
| 164 | 160 | 162 | 1  | BACKBONE            |
| 165 | 160 | 164 | 1  |                     |
| 166 | 162 | 163 | 2  | BACKBONE            |
| 167 | 162 | 173 | am | BACKBONE   INTERRES |
| 168 | 164 | 165 | 1  |                     |
| 169 | 164 | 166 | 1  |                     |
| 170 | 164 | 167 | 1  |                     |
| 171 | 167 | 168 | 1  |                     |
| 172 | 167 | 169 | 1  |                     |
| 173 | 167 | 170 | 1  |                     |
| 174 | 170 | 171 | ar |                     |
| 175 | 170 | 172 | ar |                     |
| 176 | 173 | 174 | 1  |                     |
| 177 | 173 | 175 | 1  | BACKBONE            |
| 178 | 175 | 176 | 1  |                     |
| 179 | 175 | 177 | 1  | BACKBONE            |
| 180 | 175 | 179 | 1  |                     |
| 181 | 177 | 178 | 2  | BACKBONE            |

|     |     |     |    |                     |
|-----|-----|-----|----|---------------------|
| 182 | 177 | 183 | am | BACKBONE   INTERRES |
| 183 | 179 | 180 | 1  |                     |
| 184 | 179 | 181 | 1  |                     |
| 185 | 179 | 182 | 1  |                     |
| 186 | 183 | 184 | 1  |                     |
| 187 | 183 | 185 | 1  | BACKBONE            |
| 188 | 185 | 186 | 1  |                     |
| 189 | 185 | 187 | 1  | BACKBONE            |
| 190 | 185 | 189 | 1  |                     |
| 191 | 187 | 188 | 2  | BACKBONE            |
| 192 | 187 | 207 | am | BACKBONE   INTERRES |
| 193 | 189 | 190 | 1  |                     |
| 194 | 189 | 191 | 1  |                     |
| 195 | 189 | 192 | 1  |                     |
| 196 | 192 | 193 | 1  |                     |
| 197 | 192 | 194 | 1  |                     |
| 198 | 192 | 195 | 1  |                     |
| 199 | 195 | 196 | 1  |                     |
| 200 | 195 | 197 | 1  |                     |
| 201 | 195 | 198 | 1  |                     |
| 202 | 198 | 199 | 1  |                     |
| 203 | 198 | 200 | ar |                     |
| 204 | 200 | 201 | ar |                     |
| 205 | 200 | 204 | ar |                     |
| 206 | 201 | 202 | 1  |                     |
| 207 | 201 | 203 | 1  |                     |
| 208 | 204 | 205 | 1  |                     |
| 209 | 204 | 206 | 1  |                     |
| 210 | 207 | 208 | 1  |                     |
| 211 | 207 | 209 | 1  | BACKBONE            |
| 212 | 209 | 210 | 1  |                     |
| 213 | 209 | 211 | 1  | BACKBONE            |
| 214 | 209 | 213 | 1  |                     |
| 215 | 211 | 212 | 2  | BACKBONE            |
| 216 | 211 | 226 | am | BACKBONE   INTERRES |
| 217 | 213 | 214 | 1  |                     |
| 218 | 213 | 215 | 1  |                     |
| 219 | 213 | 218 | 1  |                     |
| 220 | 215 | 216 | 1  |                     |
| 221 | 215 | 217 | 1  |                     |
| 222 | 215 | 222 | 1  |                     |
| 223 | 218 | 219 | 1  |                     |
| 224 | 218 | 220 | 1  |                     |
| 225 | 218 | 221 | 1  |                     |
| 226 | 222 | 223 | 1  |                     |
| 227 | 222 | 224 | 1  |                     |
| 228 | 222 | 225 | 1  |                     |
| 229 | 226 | 227 | 1  |                     |
| 230 | 226 | 228 | 1  | BACKBONE            |
| 231 | 228 | 229 | 1  |                     |
| 232 | 228 | 230 | 1  | BACKBONE            |
| 233 | 228 | 232 | 1  |                     |

|     |     |     |    |                     |
|-----|-----|-----|----|---------------------|
| 234 | 230 | 231 | 2  | BACKBONE            |
| 235 | 230 | 246 | am | BACKBONE   INTERRES |
| 236 | 232 | 233 | 1  |                     |
| 237 | 232 | 234 | 1  |                     |
| 238 | 232 | 235 | 1  |                     |
| 239 | 235 | 236 | ar |                     |
| 240 | 235 | 238 | ar |                     |
| 241 | 236 | 237 | 1  |                     |
| 242 | 236 | 240 | ar |                     |
| 243 | 238 | 239 | 1  |                     |
| 244 | 238 | 242 | ar |                     |
| 245 | 240 | 241 | 1  |                     |
| 246 | 240 | 244 | ar |                     |
| 247 | 242 | 243 | 1  |                     |
| 248 | 242 | 244 | ar |                     |
| 249 | 244 | 245 | 1  |                     |
| 250 | 246 | 247 | 1  |                     |
| 251 | 246 | 248 | 1  | BACKBONE            |
| 252 | 248 | 249 | 1  |                     |
| 253 | 248 | 250 | 1  | BACKBONE            |
| 254 | 248 | 252 | 1  |                     |
| 255 | 250 | 251 | 2  | BACKBONE            |
| 256 | 250 | 260 | am | BACKBONE   INTERRES |
| 257 | 252 | 253 | 1  |                     |
| 258 | 252 | 254 | 1  |                     |
| 259 | 252 | 256 | 1  |                     |
| 260 | 254 | 255 | 1  |                     |
| 261 | 256 | 257 | 1  |                     |
| 262 | 256 | 258 | 1  |                     |
| 263 | 256 | 259 | 1  |                     |
| 264 | 260 | 261 | 1  |                     |
| 265 | 260 | 262 | 1  | BACKBONE            |
| 266 | 262 | 263 | 1  |                     |
| 267 | 262 | 264 | 1  | BACKBONE            |
| 268 | 262 | 266 | 1  |                     |
| 269 | 264 | 265 | 2  | BACKBONE            |
| 270 | 264 | 280 | am | BACKBONE   INTERRES |
| 271 | 266 | 267 | 1  |                     |
| 272 | 266 | 268 | 1  |                     |
| 273 | 266 | 269 | 1  |                     |
| 274 | 269 | 270 | ar |                     |
| 275 | 269 | 272 | ar |                     |
| 276 | 270 | 271 | 1  |                     |
| 277 | 270 | 274 | ar |                     |
| 278 | 272 | 273 | 1  |                     |
| 279 | 272 | 276 | ar |                     |
| 280 | 274 | 275 | 1  |                     |
| 281 | 274 | 278 | ar |                     |
| 282 | 276 | 277 | 1  |                     |
| 283 | 276 | 278 | ar |                     |
| 284 | 278 | 279 | 1  |                     |
| 285 | 280 | 281 | 1  |                     |

|     |     |     |    |                     |
|-----|-----|-----|----|---------------------|
| 286 | 280 | 282 | 1  | BACKBONE            |
| 287 | 282 | 283 | 1  |                     |
| 288 | 282 | 284 | 1  |                     |
| 289 | 282 | 285 | 1  | BACKBONE            |
| 290 | 285 | 286 | 2  | BACKBONE            |
| 291 | 285 | 287 | am | BACKBONE   INTERRES |
| 292 | 287 | 288 | 1  |                     |
| 293 | 287 | 289 | 1  | BACKBONE            |
| 294 | 289 | 290 | 1  |                     |
| 295 | 289 | 291 | 1  | BACKBONE            |
| 296 | 289 | 293 | 1  |                     |
| 297 | 291 | 292 | 2  | BACKBONE            |
| 298 | 291 | 301 | am | BACKBONE   INTERRES |
| 299 | 293 | 294 | 1  |                     |
| 300 | 293 | 295 | 1  |                     |
| 301 | 293 | 297 | 1  |                     |
| 302 | 295 | 296 | 1  |                     |
| 303 | 297 | 298 | 1  |                     |
| 304 | 297 | 299 | 1  |                     |
| 305 | 297 | 300 | 1  |                     |
| 306 | 301 | 302 | 1  |                     |
| 307 | 301 | 303 | 1  | BACKBONE            |
| 308 | 303 | 304 | 1  |                     |
| 309 | 303 | 305 | 1  | BACKBONE            |
| 310 | 303 | 307 | 1  |                     |
| 311 | 305 | 306 | 2  | BACKBONE            |
| 312 | 305 | 325 | am | BACKBONE   INTERRES |
| 313 | 307 | 308 | 1  |                     |
| 314 | 307 | 309 | 1  |                     |
| 315 | 307 | 310 | 1  |                     |
| 316 | 310 | 311 | 2  |                     |
| 317 | 310 | 313 | 1  |                     |
| 318 | 311 | 312 | 1  |                     |
| 319 | 311 | 314 | 1  |                     |
| 320 | 313 | 316 | ar |                     |
| 321 | 313 | 317 | ar |                     |
| 322 | 314 | 315 | 1  |                     |
| 323 | 314 | 316 | 1  |                     |
| 324 | 316 | 319 | ar |                     |
| 325 | 317 | 318 | 1  |                     |
| 326 | 317 | 321 | ar |                     |
| 327 | 319 | 320 | 1  |                     |
| 328 | 319 | 323 | ar |                     |
| 329 | 321 | 322 | 1  |                     |
| 330 | 321 | 323 | ar |                     |
| 331 | 323 | 324 | 1  |                     |
| 332 | 325 | 326 | 1  |                     |
| 333 | 325 | 327 | 1  | BACKBONE            |
| 334 | 327 | 328 | 1  |                     |
| 335 | 327 | 329 | 1  | BACKBONE            |
| 336 | 327 | 331 | 1  |                     |
| 337 | 329 | 330 | 2  | BACKBONE            |



|     |     |     |    |                     |
|-----|-----|-----|----|---------------------|
| 338 | 329 | 344 | am | BACKBONE   INTERRES |
| 339 | 331 | 332 | 1  |                     |
| 340 | 331 | 333 | 1  |                     |
| 341 | 331 | 336 | 1  |                     |
| 342 | 333 | 334 | 1  |                     |
| 343 | 333 | 335 | 1  |                     |
| 344 | 333 | 340 | 1  |                     |
| 345 | 336 | 337 | 1  |                     |
| 346 | 336 | 338 | 1  |                     |
| 347 | 336 | 339 | 1  |                     |
| 348 | 340 | 341 | 1  |                     |
| 349 | 340 | 342 | 1  |                     |
| 350 | 340 | 343 | 1  |                     |
| 351 | 344 | 345 | 1  |                     |
| 352 | 344 | 346 | 1  | BACKBONE            |
| 353 | 346 | 347 | 1  |                     |
| 354 | 346 | 348 | 1  | BACKBONE            |
| 355 | 346 | 350 | 1  |                     |
| 356 | 348 | 349 | 2  | BACKBONE            |
| 357 | 348 | 365 | am | BACKBONE   INTERRES |
| 358 | 350 | 351 | 1  |                     |
| 359 | 350 | 352 | 1  |                     |
| 360 | 350 | 353 | 1  |                     |
| 361 | 353 | 354 | ar |                     |
| 362 | 353 | 356 | ar |                     |
| 363 | 354 | 355 | 1  |                     |
| 364 | 354 | 358 | ar |                     |
| 365 | 356 | 357 | 1  |                     |
| 366 | 356 | 360 | ar |                     |
| 367 | 358 | 359 | 1  |                     |
| 368 | 358 | 362 | ar |                     |
| 369 | 360 | 361 | 1  |                     |
| 370 | 360 | 362 | ar |                     |
| 371 | 362 | 363 | 1  |                     |
| 372 | 363 | 364 | 1  |                     |
| 373 | 365 | 366 | 1  |                     |
| 374 | 365 | 367 | 1  | BACKBONE            |
| 375 | 367 | 368 | 1  |                     |
| 376 | 367 | 369 | 1  | BACKBONE            |
| 377 | 367 | 371 | 1  |                     |
| 378 | 369 | 370 | 2  | BACKBONE            |
| 379 | 369 | 376 | am | BACKBONE   INTERRES |
| 380 | 371 | 372 | 1  |                     |
| 381 | 371 | 373 | 1  |                     |
| 382 | 371 | 374 | 1  |                     |
| 383 | 374 | 375 | 1  |                     |
| 384 | 376 | 377 | 1  |                     |
| 385 | 376 | 378 | 1  | BACKBONE            |
| 386 | 378 | 379 | 1  |                     |
| 387 | 378 | 380 | 1  | BACKBONE            |
| 388 | 378 | 382 | 1  |                     |
| 389 | 380 | 381 | 2  | BACKBONE            |

|     |     |     |    |                     |
|-----|-----|-----|----|---------------------|
| 390 | 380 | 392 | am | BACKBONE   INTERRES |
| 391 | 382 | 383 | 1  |                     |
| 392 | 382 | 384 | 1  |                     |
| 393 | 382 | 388 | 1  |                     |
| 394 | 384 | 385 | 1  |                     |
| 395 | 384 | 386 | 1  |                     |
| 396 | 384 | 387 | 1  |                     |
| 397 | 388 | 389 | 1  |                     |
| 398 | 388 | 390 | 1  |                     |
| 399 | 388 | 391 | 1  |                     |
| 400 | 392 | 393 | 1  |                     |
| 401 | 392 | 394 | 1  | BACKBONE            |
| 402 | 394 | 395 | 1  |                     |
| 403 | 394 | 396 | 1  | BACKBONE            |
| 404 | 394 | 398 | 1  |                     |
| 405 | 396 | 397 | 2  | BACKBONE            |
| 406 | 396 | 406 | am | BACKBONE   INTERRES |
| 407 | 398 | 399 | 1  |                     |
| 408 | 398 | 400 | 1  |                     |
| 409 | 398 | 401 | 1  |                     |
| 410 | 401 | 402 | am |                     |
| 411 | 401 | 405 | 2  |                     |
| 412 | 402 | 403 | 1  |                     |
| 413 | 402 | 404 | 1  |                     |
| 414 | 406 | 407 | 1  |                     |
| 415 | 406 | 408 | 1  | BACKBONE            |
| 416 | 408 | 409 | 1  |                     |
| 417 | 408 | 410 | 1  | BACKBONE            |
| 418 | 408 | 412 | 1  |                     |
| 419 | 410 | 411 | 2  | BACKBONE            |
| 420 | 410 | 428 | am | BACKBONE   INTERRES |
| 421 | 412 | 413 | 1  |                     |
| 422 | 412 | 414 | 1  |                     |
| 423 | 412 | 415 | 1  |                     |
| 424 | 415 | 416 | 1  |                     |
| 425 | 415 | 417 | 1  |                     |
| 426 | 415 | 418 | 1  |                     |
| 427 | 418 | 419 | 1  |                     |
| 428 | 418 | 420 | 1  |                     |
| 429 | 418 | 421 | 1  |                     |
| 430 | 421 | 422 | 1  |                     |
| 431 | 421 | 423 | 1  |                     |
| 432 | 421 | 424 | 1  |                     |
| 433 | 424 | 425 | 1  |                     |
| 434 | 424 | 426 | 1  |                     |
| 435 | 424 | 427 | 1  |                     |
| 436 | 428 | 429 | 1  |                     |
| 437 | 428 | 430 | 1  | BACKBONE            |
| 438 | 430 | 431 | 1  |                     |
| 439 | 430 | 432 | 1  | BACKBONE            |
| 440 | 430 | 434 | 1  |                     |
| 441 | 432 | 433 | 2  | BACKBONE            |

|     |     |     |    |                     |
|-----|-----|-----|----|---------------------|
| 442 | 432 | 443 | am | BACKBONE   INTERRES |
| 443 | 434 | 435 | 1  |                     |
| 444 | 434 | 436 | 1  |                     |
| 445 | 434 | 437 | 1  |                     |
| 446 | 437 | 438 | 1  |                     |
| 447 | 437 | 439 | 1  |                     |
| 448 | 437 | 440 | 1  |                     |
| 449 | 440 | 441 | ar |                     |
| 450 | 440 | 442 | ar |                     |
| 451 | 443 | 444 | 1  |                     |
| 452 | 443 | 445 | 1  | BACKBONE            |
| 453 | 445 | 446 | 1  |                     |
| 454 | 445 | 447 | 1  | BACKBONE            |
| 455 | 445 | 449 | 1  |                     |
| 456 | 447 | 448 | 2  | BACKBONE            |
| 457 | 447 | 460 | am | BACKBONE   INTERRES |
| 458 | 449 | 450 | 1  |                     |
| 459 | 449 | 451 | 1  |                     |
| 460 | 449 | 452 | 1  |                     |
| 461 | 452 | 453 | 1  |                     |
| 462 | 452 | 454 | 1  |                     |
| 463 | 452 | 455 | 1  |                     |
| 464 | 455 | 456 | am |                     |
| 465 | 455 | 459 | 2  |                     |
| 466 | 456 | 457 | 1  |                     |
| 467 | 456 | 458 | 1  |                     |
| 468 | 460 | 461 | 1  |                     |
| 469 | 460 | 462 | 1  | BACKBONE            |
| 470 | 462 | 463 | 1  |                     |
| 471 | 462 | 464 | 1  | BACKBONE            |
| 472 | 462 | 466 | 1  |                     |
| 473 | 464 | 465 | 2  | BACKBONE            |
| 474 | 464 | 479 | am | BACKBONE   INTERRES |
| 475 | 466 | 467 | 1  |                     |
| 476 | 466 | 468 | 1  |                     |
| 477 | 466 | 469 | 1  |                     |
| 478 | 469 | 470 | 1  |                     |
| 479 | 469 | 471 | 1  |                     |
| 480 | 469 | 475 | 1  |                     |
| 481 | 471 | 472 | 1  |                     |
| 482 | 471 | 473 | 1  |                     |
| 483 | 471 | 474 | 1  |                     |
| 484 | 475 | 476 | 1  |                     |
| 485 | 475 | 477 | 1  |                     |
| 486 | 475 | 478 | 1  |                     |
| 487 | 479 | 480 | 1  |                     |
| 488 | 479 | 481 | 1  | BACKBONE            |
| 489 | 481 | 482 | 1  |                     |
| 490 | 481 | 483 | 1  | BACKBONE            |
| 491 | 481 | 485 | 1  |                     |
| 492 | 483 | 484 | 2  | BACKBONE            |
| 493 | 483 | 489 | am | BACKBONE   INTERRES |

|     |     |     |    |                     |
|-----|-----|-----|----|---------------------|
| 494 | 485 | 486 | 1  |                     |
| 495 | 485 | 487 | 1  |                     |
| 496 | 485 | 488 | 1  |                     |
| 497 | 489 | 490 | 1  |                     |
| 498 | 489 | 491 | 1  | BACKBONE            |
| 499 | 491 | 492 | 1  |                     |
| 500 | 491 | 493 | 1  | BACKBONE            |
| 501 | 491 | 495 | 1  |                     |
| 502 | 493 | 494 | 2  | BACKBONE            |
| 503 | 493 | 513 | am | BACKBONE   INTERRES |
| 504 | 495 | 496 | 1  |                     |
| 505 | 495 | 497 | 1  |                     |
| 506 | 495 | 498 | 1  |                     |
| 507 | 498 | 499 | 1  |                     |
| 508 | 498 | 500 | 1  |                     |
| 509 | 498 | 501 | 1  |                     |
| 510 | 501 | 502 | 1  |                     |
| 511 | 501 | 503 | 1  |                     |
| 512 | 501 | 504 | 1  |                     |
| 513 | 504 | 505 | 1  |                     |
| 514 | 504 | 506 | ar |                     |
| 515 | 506 | 507 | ar |                     |
| 516 | 506 | 510 | ar |                     |
| 517 | 507 | 508 | 1  |                     |
| 518 | 507 | 509 | 1  |                     |
| 519 | 510 | 511 | 1  |                     |
| 520 | 510 | 512 | 1  |                     |
| 521 | 513 | 514 | 1  |                     |
| 522 | 513 | 515 | 1  | BACKBONE            |
| 523 | 515 | 516 | 1  |                     |
| 524 | 515 | 517 | 1  | BACKBONE            |
| 525 | 515 | 519 | 1  |                     |
| 526 | 517 | 518 | 2  | BACKBONE            |
| 527 | 517 | 523 | am | BACKBONE   INTERRES |
| 528 | 519 | 520 | 1  |                     |
| 529 | 519 | 521 | 1  |                     |
| 530 | 519 | 522 | 1  |                     |
| 531 | 523 | 524 | 1  |                     |
| 532 | 523 | 525 | 1  | BACKBONE            |
| 533 | 525 | 526 | 1  |                     |
| 534 | 525 | 527 | 1  |                     |
| 535 | 525 | 528 | 1  | BACKBONE            |
| 536 | 528 | 529 | 2  | BACKBONE            |
| 537 | 528 | 530 | am | BACKBONE   INTERRES |
| 538 | 530 | 531 | 1  |                     |
| 539 | 530 | 532 | 1  | BACKBONE            |
| 540 | 532 | 533 | 1  |                     |
| 541 | 532 | 534 | 1  | BACKBONE            |
| 542 | 532 | 536 | 1  |                     |
| 543 | 534 | 535 | 2  | BACKBONE            |
| 544 | 534 | 550 | am | BACKBONE   INTERRES |
| 545 | 536 | 537 | 1  |                     |

|     |     |     |    |                     |
|-----|-----|-----|----|---------------------|
| 546 | 536 | 538 | 1  |                     |
| 547 | 536 | 539 | 1  |                     |
| 548 | 539 | 540 | ar |                     |
| 549 | 539 | 542 | ar |                     |
| 550 | 540 | 541 | 1  |                     |
| 551 | 540 | 544 | ar |                     |
| 552 | 542 | 543 | 1  |                     |
| 553 | 542 | 546 | ar |                     |
| 554 | 544 | 545 | 1  |                     |
| 555 | 544 | 548 | ar |                     |
| 556 | 546 | 547 | 1  |                     |
| 557 | 546 | 548 | ar |                     |
| 558 | 548 | 549 | 1  |                     |
| 559 | 550 | 551 | 1  |                     |
| 560 | 550 | 552 | 1  | BACKBONE            |
| 561 | 552 | 553 | 1  |                     |
| 562 | 552 | 554 | 1  | BACKBONE            |
| 563 | 552 | 556 | 1  |                     |
| 564 | 554 | 555 | 2  | BACKBONE            |
| 565 | 554 | 571 | am | BACKBONE   INTERRES |
| 566 | 556 | 557 | 1  |                     |
| 567 | 556 | 558 | 1  |                     |
| 568 | 556 | 559 | 1  |                     |
| 569 | 559 | 560 | ar |                     |
| 570 | 559 | 562 | ar |                     |
| 571 | 560 | 561 | 1  |                     |
| 572 | 560 | 564 | ar |                     |
| 573 | 562 | 563 | 1  |                     |
| 574 | 562 | 566 | ar |                     |
| 575 | 564 | 565 | 1  |                     |
| 576 | 564 | 568 | ar |                     |
| 577 | 566 | 567 | 1  |                     |
| 578 | 566 | 568 | ar |                     |
| 579 | 568 | 569 | 1  |                     |
| 580 | 569 | 570 | 1  |                     |
| 581 | 571 | 572 | 1  |                     |
| 582 | 571 | 573 | 1  | BACKBONE            |
| 583 | 573 | 574 | 1  |                     |
| 584 | 573 | 575 | 1  | BACKBONE            |
| 585 | 573 | 577 | 1  |                     |
| 586 | 575 | 576 | 2  | BACKBONE            |
| 587 | 575 | 581 | am | BACKBONE   INTERRES |
| 588 | 577 | 578 | 1  |                     |
| 589 | 577 | 579 | 1  |                     |
| 590 | 577 | 580 | 1  |                     |
| 591 | 581 | 582 | 1  |                     |
| 592 | 581 | 583 | 1  | BACKBONE            |
| 593 | 583 | 584 | 1  |                     |
| 594 | 583 | 585 | 1  | BACKBONE            |
| 595 | 583 | 587 | 1  |                     |
| 596 | 585 | 586 | 2  | BACKBONE            |
| 597 | 585 | 600 | am | BACKBONE   INTERRES |

|     |     |     |    |                     |
|-----|-----|-----|----|---------------------|
| 598 | 587 | 588 | 1  |                     |
| 599 | 587 | 589 | 1  |                     |
| 600 | 587 | 590 | 1  |                     |
| 601 | 590 | 591 | 1  |                     |
| 602 | 590 | 592 | 1  |                     |
| 603 | 590 | 596 | 1  |                     |
| 604 | 592 | 593 | 1  |                     |
| 605 | 592 | 594 | 1  |                     |
| 606 | 592 | 595 | 1  |                     |
| 607 | 596 | 597 | 1  |                     |
| 608 | 596 | 598 | 1  |                     |
| 609 | 596 | 599 | 1  |                     |
| 610 | 600 | 601 | 1  |                     |
| 611 | 600 | 602 | 1  | BACKBONE            |
| 612 | 602 | 603 | 1  |                     |
| 613 | 602 | 604 | 1  |                     |
| 614 | 602 | 605 | 1  | BACKBONE            |
| 615 | 605 | 606 | 2  | BACKBONE            |
| 616 | 605 | 607 | am | BACKBONE   INTERRES |
| 617 | 607 | 608 | 1  |                     |
| 618 | 607 | 609 | 1  | BACKBONE            |
| 619 | 609 | 610 | 1  |                     |
| 620 | 609 | 611 | 1  | BACKBONE            |
| 621 | 609 | 613 | 1  |                     |
| 622 | 611 | 612 | 2  | BACKBONE            |
| 623 | 611 | 622 | am | BACKBONE   INTERRES |
| 624 | 613 | 614 | 1  |                     |
| 625 | 613 | 615 | 1  |                     |
| 626 | 613 | 616 | 1  |                     |
| 627 | 616 | 617 | 1  |                     |
| 628 | 616 | 618 | 1  |                     |
| 629 | 616 | 619 | 1  |                     |
| 630 | 619 | 620 | ar |                     |
| 631 | 619 | 621 | ar |                     |
| 632 | 622 | 623 | 1  |                     |
| 633 | 622 | 624 | 1  | BACKBONE            |
| 634 | 624 | 625 | 1  |                     |
| 635 | 624 | 626 | 1  |                     |
| 636 | 624 | 627 | 1  | BACKBONE            |
| 637 | 627 | 628 | 2  | BACKBONE            |
| 638 | 627 | 629 | am | BACKBONE   INTERRES |
| 639 | 629 | 630 | 1  |                     |
| 640 | 629 | 631 | 1  | BACKBONE            |
| 641 | 631 | 632 | 1  |                     |
| 642 | 631 | 633 | 1  | BACKBONE            |
| 643 | 631 | 635 | 1  |                     |
| 644 | 633 | 634 | 2  | BACKBONE            |
| 645 | 633 | 641 | am | BACKBONE   INTERRES |
| 646 | 635 | 636 | 1  |                     |
| 647 | 635 | 637 | 1  |                     |
| 648 | 635 | 638 | 1  |                     |
| 649 | 638 | 639 | ar |                     |

|     |     |     |    |                     |
|-----|-----|-----|----|---------------------|
| 650 | 638 | 640 | ar |                     |
| 651 | 641 | 642 | 1  |                     |
| 652 | 641 | 643 | 1  | BACKBONE            |
| 653 | 643 | 644 | 1  |                     |
| 654 | 643 | 645 | 1  | BACKBONE            |
| 655 | 643 | 647 | 1  |                     |
| 656 | 645 | 646 | 2  | BACKBONE            |
| 657 | 645 | 663 | am | BACKBONE   INTERRES |
| 658 | 647 | 648 | 1  |                     |
| 659 | 647 | 649 | 1  |                     |
| 660 | 647 | 650 | 1  |                     |
| 661 | 650 | 651 | 1  |                     |
| 662 | 650 | 652 | 1  |                     |
| 663 | 650 | 653 | 1  |                     |
| 664 | 653 | 654 | 1  |                     |
| 665 | 653 | 655 | 1  |                     |
| 666 | 653 | 656 | 1  |                     |
| 667 | 656 | 657 | 1  |                     |
| 668 | 656 | 658 | 1  |                     |
| 669 | 656 | 659 | 1  |                     |
| 670 | 659 | 660 | 1  |                     |
| 671 | 659 | 661 | 1  |                     |
| 672 | 659 | 662 | 1  |                     |
| 673 | 663 | 664 | 1  |                     |
| 674 | 663 | 665 | 1  | BACKBONE            |
| 675 | 665 | 666 | 1  |                     |
| 676 | 665 | 667 | 1  | BACKBONE            |
| 677 | 665 | 669 | 1  |                     |
| 678 | 667 | 668 | 2  | BACKBONE            |
| 679 | 667 | 679 | am | BACKBONE   INTERRES |
| 680 | 669 | 670 | 1  |                     |
| 681 | 669 | 671 | 1  |                     |
| 682 | 669 | 675 | 1  |                     |
| 683 | 671 | 672 | 1  |                     |
| 684 | 671 | 673 | 1  |                     |
| 685 | 671 | 674 | 1  |                     |
| 686 | 675 | 676 | 1  |                     |
| 687 | 675 | 677 | 1  |                     |
| 688 | 675 | 678 | 1  |                     |
| 689 | 679 | 680 | 1  |                     |
| 690 | 679 | 681 | 1  | BACKBONE            |
| 691 | 681 | 682 | 1  |                     |
| 692 | 681 | 683 | 1  | BACKBONE            |
| 693 | 681 | 685 | 1  |                     |
| 694 | 683 | 684 | 2  | BACKBONE            |
| 695 | 683 | 701 | am | BACKBONE   INTERRES |
| 696 | 685 | 686 | 1  |                     |
| 697 | 685 | 687 | 1  |                     |
| 698 | 685 | 688 | 1  |                     |
| 699 | 688 | 689 | 1  |                     |
| 700 | 688 | 690 | 1  |                     |
| 701 | 688 | 691 | 1  |                     |

|     |     |     |    |                     |
|-----|-----|-----|----|---------------------|
| 702 | 691 | 692 | 1  |                     |
| 703 | 691 | 693 | 1  |                     |
| 704 | 691 | 694 | 1  |                     |
| 705 | 694 | 695 | 1  |                     |
| 706 | 694 | 696 | 1  |                     |
| 707 | 694 | 697 | 1  |                     |
| 708 | 697 | 698 | 1  |                     |
| 709 | 697 | 699 | 1  |                     |
| 710 | 697 | 700 | 1  |                     |
| 711 | 701 | 702 | 1  |                     |
| 712 | 701 | 703 | 1  | BACKBONE            |
| 713 | 703 | 704 | 1  |                     |
| 714 | 703 | 705 | 1  | BACKBONE            |
| 715 | 703 | 707 | 1  |                     |
| 716 | 705 | 706 | 2  | BACKBONE            |
| 717 | 705 | 711 | am | BACKBONE   INTERRES |
| 718 | 707 | 708 | 1  |                     |
| 719 | 707 | 709 | 1  |                     |
| 720 | 707 | 710 | 1  |                     |
| 721 | 711 | 712 | 1  |                     |
| 722 | 711 | 713 | 1  | BACKBONE            |
| 723 | 713 | 714 | 1  |                     |
| 724 | 713 | 715 | 1  | BACKBONE            |
| 725 | 713 | 717 | 1  |                     |
| 726 | 715 | 716 | 2  | BACKBONE            |
| 727 | 715 | 731 | am | BACKBONE   INTERRES |
| 728 | 717 | 718 | 1  |                     |
| 729 | 717 | 719 | 1  |                     |
| 730 | 717 | 720 | 1  |                     |
| 731 | 720 | 721 | ar |                     |
| 732 | 720 | 723 | ar |                     |
| 733 | 721 | 722 | 1  |                     |
| 734 | 721 | 725 | ar |                     |
| 735 | 723 | 724 | 1  |                     |
| 736 | 723 | 727 | ar |                     |
| 737 | 725 | 726 | 1  |                     |
| 738 | 725 | 729 | ar |                     |
| 739 | 727 | 728 | 1  |                     |
| 740 | 727 | 729 | ar |                     |
| 741 | 729 | 730 | 1  |                     |
| 742 | 731 | 732 | 1  |                     |
| 743 | 731 | 733 | 1  | BACKBONE            |
| 744 | 733 | 734 | 1  |                     |
| 745 | 733 | 735 | 1  | BACKBONE            |
| 746 | 733 | 737 | 1  |                     |
| 747 | 735 | 736 | 2  | BACKBONE            |
| 748 | 735 | 748 | am | BACKBONE   INTERRES |
| 749 | 737 | 738 | 1  |                     |
| 750 | 737 | 739 | 1  |                     |
| 751 | 737 | 740 | 1  |                     |
| 752 | 740 | 741 | 1  |                     |
| 753 | 740 | 742 | 2  |                     |



|     |     |     |    |                     |
|-----|-----|-----|----|---------------------|
| 754 | 741 | 744 | 2  |                     |
| 755 | 742 | 743 | 1  |                     |
| 756 | 742 | 746 | 1  |                     |
| 757 | 744 | 745 | 1  |                     |
| 758 | 744 | 746 | 1  |                     |
| 759 | 746 | 747 | 1  |                     |
| 760 | 748 | 749 | 1  |                     |
| 761 | 748 | 750 | 1  | BACKBONE            |
| 762 | 750 | 751 | 1  |                     |
| 763 | 750 | 752 | 1  | BACKBONE            |
| 764 | 750 | 754 | 1  |                     |
| 765 | 752 | 753 | 2  | BACKBONE            |
| 766 | 752 | 758 | am | BACKBONE   INTERRES |
| 767 | 754 | 755 | 1  |                     |
| 768 | 754 | 756 | 1  |                     |
| 769 | 754 | 757 | 1  |                     |
| 770 | 758 | 759 | 1  |                     |
| 771 | 758 | 760 | 1  | BACKBONE            |
| 772 | 760 | 761 | 1  |                     |
| 773 | 760 | 762 | 1  |                     |
| 774 | 760 | 763 | 1  | BACKBONE            |
| 775 | 763 | 764 | 2  | BACKBONE            |
| 776 | 763 | 765 | am | BACKBONE   INTERRES |
| 777 | 765 | 766 | 1  |                     |
| 778 | 765 | 767 | 1  | BACKBONE            |
| 779 | 767 | 768 | 1  |                     |
| 780 | 767 | 769 | 1  |                     |
| 781 | 767 | 770 | 1  | BACKBONE            |
| 782 | 770 | 771 | 2  | BACKBONE            |
| 783 | 770 | 772 | am | BACKBONE   INTERRES |
| 784 | 772 | 773 | 1  |                     |
| 785 | 772 | 774 | 1  | BACKBONE            |
| 786 | 774 | 775 | 1  |                     |
| 787 | 774 | 776 | 1  |                     |
| 788 | 774 | 777 | 1  | BACKBONE            |
| 789 | 777 | 778 | 2  | BACKBONE            |
| 790 | 777 | 779 | am | BACKBONE   INTERRES |
| 791 | 779 | 780 | 1  |                     |
| 792 | 779 | 781 | 1  | BACKBONE            |
| 793 | 781 | 782 | 1  |                     |
| 794 | 781 | 783 | 1  | BACKBONE            |
| 795 | 781 | 785 | 1  |                     |
| 796 | 783 | 784 | 2  | BACKBONE            |
| 797 | 783 | 798 | am | BACKBONE   INTERRES |
| 798 | 785 | 786 | 1  |                     |
| 799 | 785 | 787 | 1  |                     |
| 800 | 785 | 788 | 1  |                     |
| 801 | 788 | 789 | 1  |                     |
| 802 | 788 | 790 | 1  |                     |
| 803 | 788 | 794 | 1  |                     |
| 804 | 790 | 791 | 1  |                     |
| 805 | 790 | 792 | 1  |                     |

|     |     |     |    |                     |
|-----|-----|-----|----|---------------------|
| 806 | 790 | 793 | 1  |                     |
| 807 | 794 | 795 | 1  |                     |
| 808 | 794 | 796 | 1  |                     |
| 809 | 794 | 797 | 1  |                     |
| 810 | 798 | 799 | 1  |                     |
| 811 | 798 | 800 | 1  | BACKBONE            |
| 812 | 800 | 801 | 1  |                     |
| 813 | 800 | 802 | 1  | BACKBONE            |
| 814 | 800 | 804 | 1  |                     |
| 815 | 802 | 803 | 2  | BACKBONE            |
| 816 | 802 | 812 | am | BACKBONE   INTERRES |
| 817 | 804 | 805 | 1  |                     |
| 818 | 804 | 806 | 1  |                     |
| 819 | 804 | 808 | 1  |                     |
| 820 | 806 | 807 | 1  |                     |
| 821 | 808 | 809 | 1  |                     |
| 822 | 808 | 810 | 1  |                     |
| 823 | 808 | 811 | 1  |                     |
| 824 | 812 | 813 | 1  |                     |
| 825 | 812 | 814 | 1  | BACKBONE            |
| 826 | 814 | 815 | 1  |                     |
| 827 | 814 | 816 | 1  | BACKBONE            |
| 828 | 814 | 818 | 1  |                     |
| 829 | 816 | 817 | 2  | BACKBONE            |
| 830 | 816 | 824 | am | BACKBONE   INTERRES |
| 831 | 818 | 819 | 1  |                     |
| 832 | 818 | 820 | 1  |                     |
| 833 | 818 | 821 | 1  |                     |
| 834 | 821 | 822 | ar |                     |
| 835 | 821 | 823 | ar |                     |
| 836 | 824 | 825 | 1  |                     |
| 837 | 824 | 826 | 1  | BACKBONE            |
| 838 | 826 | 827 | 1  |                     |
| 839 | 826 | 828 | 1  | BACKBONE            |
| 840 | 826 | 830 | 1  |                     |
| 841 | 828 | 829 | 2  | BACKBONE            |
| 842 | 828 | 848 | am | BACKBONE   INTERRES |
| 843 | 830 | 831 | 1  |                     |
| 844 | 830 | 832 | 1  |                     |
| 845 | 830 | 833 | 1  |                     |
| 846 | 833 | 834 | 2  |                     |
| 847 | 833 | 836 | 1  |                     |
| 848 | 834 | 835 | 1  |                     |
| 849 | 834 | 837 | 1  |                     |
| 850 | 836 | 839 | ar |                     |
| 851 | 836 | 840 | ar |                     |
| 852 | 837 | 838 | 1  |                     |
| 853 | 837 | 839 | 1  |                     |
| 854 | 839 | 842 | ar |                     |
| 855 | 840 | 841 | 1  |                     |
| 856 | 840 | 844 | ar |                     |
| 857 | 842 | 843 | 1  |                     |

|     |     |      |    |                     |
|-----|-----|------|----|---------------------|
| 858 | 842 | 846  | ar |                     |
| 859 | 844 | 845  | 1  |                     |
| 860 | 844 | 846  | ar |                     |
| 861 | 846 | 847  | 1  |                     |
| 862 | 848 | 849  | 1  |                     |
| 863 | 848 | 850  | 1  | BACKBONE            |
| 864 | 850 | 851  | 1  |                     |
| 865 | 850 | 852  | 1  | BACKBONE            |
| 866 | 850 | 854  | 1  |                     |
| 867 | 852 | 853  | 2  | BACKBONE            |
| 868 | 852 | 869  | am | BACKBONE   INTERRES |
| 869 | 854 | 855  | 1  |                     |
| 870 | 854 | 856  | 1  |                     |
| 871 | 854 | 857  | 1  |                     |
| 872 | 857 | 858  | 1  |                     |
| 873 | 857 | 859  | 1  |                     |
| 874 | 857 | 860  | 1  |                     |
| 875 | 860 | 861  | 1  |                     |
| 876 | 860 | 862  | 1  |                     |
| 877 | 860 | 863  | 1  |                     |
| 878 | 863 | 864  | 1  |                     |
| 879 | 863 | 865  | 1  |                     |
| 880 | 863 | 866  | 1  |                     |
| 881 | 866 | 867  | 1  |                     |
| 882 | 866 | 868  | 1  |                     |
| 883 | 866 | 1464 | 1  | INTERRES            |
| 884 | 869 | 870  | 1  | BACKBONE            |
| 885 | 869 | 880  | 1  |                     |
| 886 | 870 | 871  | 1  |                     |
| 887 | 870 | 872  | 1  | BACKBONE            |
| 888 | 870 | 874  | 1  |                     |
| 889 | 872 | 873  | 2  | BACKBONE            |
| 890 | 872 | 883  | am | BACKBONE   INTERRES |
| 891 | 874 | 875  | 1  |                     |
| 892 | 874 | 876  | 1  |                     |
| 893 | 874 | 877  | 1  |                     |
| 894 | 877 | 878  | 1  |                     |
| 895 | 877 | 879  | 1  |                     |
| 896 | 877 | 880  | 1  |                     |
| 897 | 880 | 881  | 1  |                     |
| 898 | 880 | 882  | 1  |                     |
| 899 | 883 | 884  | 1  |                     |
| 900 | 883 | 885  | 1  | BACKBONE            |
| 901 | 885 | 886  | 1  |                     |
| 902 | 885 | 887  | 1  | BACKBONE            |
| 903 | 885 | 889  | 1  |                     |
| 904 | 887 | 888  | 2  | BACKBONE            |
| 905 | 887 | 894  | am | BACKBONE   INTERRES |
| 906 | 889 | 890  | 1  |                     |
| 907 | 889 | 891  | 1  |                     |
| 908 | 889 | 892  | 1  |                     |
| 909 | 892 | 893  | 1  |                     |

|     |     |     |    |                     |
|-----|-----|-----|----|---------------------|
| 910 | 894 | 895 | 1  |                     |
| 911 | 894 | 896 | 1  | BACKBONE            |
| 912 | 896 | 897 | 1  |                     |
| 913 | 896 | 898 | 1  | BACKBONE            |
| 914 | 896 | 900 | 1  |                     |
| 915 | 898 | 899 | 2  | BACKBONE            |
| 916 | 898 | 909 | am | BACKBONE   INTERRES |
| 917 | 900 | 901 | 1  |                     |
| 918 | 900 | 902 | 1  |                     |
| 919 | 900 | 903 | 1  |                     |
| 920 | 903 | 904 | 1  |                     |
| 921 | 903 | 905 | 1  |                     |
| 922 | 903 | 906 | 1  |                     |
| 923 | 906 | 907 | ar |                     |
| 924 | 906 | 908 | ar |                     |
| 925 | 909 | 910 | 1  |                     |
| 926 | 909 | 911 | 1  | BACKBONE            |
| 927 | 911 | 912 | 1  |                     |
| 928 | 911 | 913 | 1  | BACKBONE            |
| 929 | 911 | 915 | 1  |                     |
| 930 | 913 | 914 | 2  | BACKBONE            |
| 931 | 913 | 921 | am | BACKBONE   INTERRES |
| 932 | 915 | 916 | 1  |                     |
| 933 | 915 | 917 | 1  |                     |
| 934 | 915 | 918 | 1  |                     |
| 935 | 918 | 919 | ar |                     |
| 936 | 918 | 920 | ar |                     |
| 937 | 921 | 922 | 1  | BACKBONE            |
| 938 | 921 | 932 | 1  |                     |
| 939 | 922 | 923 | 1  |                     |
| 940 | 922 | 924 | 1  | BACKBONE            |
| 941 | 922 | 926 | 1  |                     |
| 942 | 924 | 925 | 2  | BACKBONE            |
| 943 | 924 | 935 | am | BACKBONE   INTERRES |
| 944 | 926 | 927 | 1  |                     |
| 945 | 926 | 928 | 1  |                     |
| 946 | 926 | 929 | 1  |                     |
| 947 | 929 | 930 | 1  |                     |
| 948 | 929 | 931 | 1  |                     |
| 949 | 929 | 932 | 1  |                     |
| 950 | 932 | 933 | 1  |                     |
| 951 | 932 | 934 | 1  |                     |
| 952 | 935 | 936 | 1  |                     |
| 953 | 935 | 937 | 1  | BACKBONE            |
| 954 | 937 | 938 | 1  |                     |
| 955 | 937 | 939 | 1  | BACKBONE            |
| 956 | 937 | 941 | 1  |                     |
| 957 | 939 | 940 | 2  | BACKBONE            |
| 958 | 939 | 959 | am | BACKBONE   INTERRES |
| 959 | 941 | 942 | 1  |                     |
| 960 | 941 | 943 | 1  |                     |
| 961 | 941 | 944 | 1  |                     |

|      |     |     |    |                     |
|------|-----|-----|----|---------------------|
| 962  | 944 | 945 | 2  |                     |
| 963  | 944 | 947 | 1  |                     |
| 964  | 945 | 946 | 1  |                     |
| 965  | 945 | 948 | 1  |                     |
| 966  | 947 | 950 | ar |                     |
| 967  | 947 | 951 | ar |                     |
| 968  | 948 | 949 | 1  |                     |
| 969  | 948 | 950 | 1  |                     |
| 970  | 950 | 953 | ar |                     |
| 971  | 951 | 952 | 1  |                     |
| 972  | 951 | 955 | ar |                     |
| 973  | 953 | 954 | 1  |                     |
| 974  | 953 | 957 | ar |                     |
| 975  | 955 | 956 | 1  |                     |
| 976  | 955 | 957 | ar |                     |
| 977  | 957 | 958 | 1  |                     |
| 978  | 959 | 960 | 1  |                     |
| 979  | 959 | 961 | 1  | BACKBONE            |
| 980  | 961 | 962 | 1  |                     |
| 981  | 961 | 963 | 1  | BACKBONE            |
| 982  | 961 | 965 | 1  |                     |
| 983  | 963 | 964 | 2  | BACKBONE            |
| 984  | 963 | 974 | am | BACKBONE   INTERRES |
| 985  | 965 | 966 | 1  |                     |
| 986  | 965 | 967 | 1  |                     |
| 987  | 965 | 968 | 1  |                     |
| 988  | 968 | 969 | 1  |                     |
| 989  | 968 | 970 | 1  |                     |
| 990  | 968 | 971 | 1  |                     |
| 991  | 971 | 972 | ar |                     |
| 992  | 971 | 973 | ar |                     |
| 993  | 974 | 975 | 1  |                     |
| 994  | 974 | 976 | 1  | BACKBONE            |
| 995  | 976 | 977 | 1  |                     |
| 996  | 976 | 978 | 1  | BACKBONE            |
| 997  | 976 | 980 | 1  |                     |
| 998  | 978 | 979 | 2  | BACKBONE            |
| 999  | 978 | 991 | am | BACKBONE   INTERRES |
| 1000 | 980 | 981 | 1  |                     |
| 1001 | 980 | 982 | 1  |                     |
| 1002 | 980 | 983 | 1  |                     |
| 1003 | 983 | 984 | 1  |                     |
| 1004 | 983 | 985 | 1  |                     |
| 1005 | 983 | 986 | 1  |                     |
| 1006 | 986 | 987 | 2  |                     |
| 1007 | 986 | 988 | am |                     |
| 1008 | 988 | 989 | 1  |                     |
| 1009 | 988 | 990 | 1  |                     |
| 1010 | 991 | 992 | 1  |                     |
| 1011 | 991 | 993 | 1  | BACKBONE            |
| 1012 | 993 | 994 | 1  |                     |
| 1013 | 993 | 995 | 1  | BACKBONE            |

|      |      |      |    |                     |
|------|------|------|----|---------------------|
| 1014 | 993  | 997  | 1  |                     |
| 1015 | 995  | 996  | 2  | BACKBONE            |
| 1016 | 995  | 1008 | am | BACKBONE   INTERRES |
| 1017 | 997  | 998  | 1  |                     |
| 1018 | 997  | 999  | 1  |                     |
| 1019 | 997  | 1000 | 1  |                     |
| 1020 | 1000 | 1001 | 1  |                     |
| 1021 | 1000 | 1003 | 2  |                     |
| 1022 | 1001 | 1002 | 1  |                     |
| 1023 | 1001 | 1005 | 1  |                     |
| 1024 | 1003 | 1004 | 1  |                     |
| 1025 | 1003 | 1007 | 1  |                     |
| 1026 | 1005 | 1006 | 1  |                     |
| 1027 | 1005 | 1007 | 2  |                     |
| 1028 | 1008 | 1009 | 1  |                     |
| 1029 | 1008 | 1010 | 1  | BACKBONE            |
| 1030 | 1010 | 1011 | 1  |                     |
| 1031 | 1010 | 1012 | 1  | BACKBONE            |
| 1032 | 1010 | 1014 | 1  |                     |
| 1033 | 1012 | 1013 | 2  | BACKBONE            |
| 1034 | 1012 | 1018 | am | BACKBONE   INTERRES |
| 1035 | 1014 | 1015 | 1  |                     |
| 1036 | 1014 | 1016 | 1  |                     |
| 1037 | 1014 | 1017 | 1  |                     |
| 1038 | 1018 | 1019 | 1  |                     |
| 1039 | 1018 | 1020 | 1  | BACKBONE            |
| 1040 | 1020 | 1021 | 1  |                     |
| 1041 | 1020 | 1022 | 1  | BACKBONE            |
| 1042 | 1020 | 1024 | 1  |                     |
| 1043 | 1022 | 1023 | 2  | BACKBONE            |
| 1044 | 1022 | 1040 | am | BACKBONE   INTERRES |
| 1045 | 1024 | 1025 | 1  |                     |
| 1046 | 1024 | 1026 | 1  |                     |
| 1047 | 1024 | 1027 | 1  |                     |
| 1048 | 1027 | 1028 | 1  |                     |
| 1049 | 1027 | 1029 | 1  |                     |
| 1050 | 1027 | 1030 | 1  |                     |
| 1051 | 1030 | 1031 | 1  |                     |
| 1052 | 1030 | 1032 | 1  |                     |
| 1053 | 1030 | 1033 | 1  |                     |
| 1054 | 1033 | 1034 | 1  |                     |
| 1055 | 1033 | 1035 | 1  |                     |
| 1056 | 1033 | 1036 | 1  |                     |
| 1057 | 1036 | 1037 | 1  |                     |
| 1058 | 1036 | 1038 | 1  |                     |
| 1059 | 1036 | 1039 | 1  |                     |
| 1060 | 1040 | 1041 | 1  |                     |
| 1061 | 1040 | 1042 | 1  | BACKBONE            |
| 1062 | 1042 | 1043 | 1  |                     |
| 1063 | 1042 | 1044 | 1  | BACKBONE            |
| 1064 | 1042 | 1046 | 1  |                     |
| 1065 | 1044 | 1045 | 2  | BACKBONE            |

|      |      |      |    |                     |
|------|------|------|----|---------------------|
| 1066 | 1044 | 1064 | am | BACKBONE   INTERRES |
| 1067 | 1046 | 1047 | 1  |                     |
| 1068 | 1046 | 1048 | 1  |                     |
| 1069 | 1046 | 1049 | 1  |                     |
| 1070 | 1049 | 1050 | 2  |                     |
| 1071 | 1049 | 1052 | 1  |                     |
| 1072 | 1050 | 1051 | 1  |                     |
| 1073 | 1050 | 1053 | 1  |                     |
| 1074 | 1052 | 1055 | ar |                     |
| 1075 | 1052 | 1056 | ar |                     |
| 1076 | 1053 | 1054 | 1  |                     |
| 1077 | 1053 | 1055 | 1  |                     |
| 1078 | 1055 | 1058 | ar |                     |
| 1079 | 1056 | 1057 | 1  |                     |
| 1080 | 1056 | 1060 | ar |                     |
| 1081 | 1058 | 1059 | 1  |                     |
| 1082 | 1058 | 1062 | ar |                     |
| 1083 | 1060 | 1061 | 1  |                     |
| 1084 | 1060 | 1062 | ar |                     |
| 1085 | 1062 | 1063 | 1  |                     |
| 1086 | 1064 | 1065 | 1  |                     |
| 1087 | 1064 | 1066 | 1  | BACKBONE            |
| 1088 | 1066 | 1067 | 1  |                     |
| 1089 | 1066 | 1068 | 1  | BACKBONE            |
| 1090 | 1066 | 1070 | 1  |                     |
| 1091 | 1068 | 1069 | 2  | BACKBONE            |
| 1092 | 1068 | 1085 | am | BACKBONE   INTERRES |
| 1093 | 1070 | 1071 | 1  |                     |
| 1094 | 1070 | 1072 | 1  |                     |
| 1095 | 1070 | 1073 | 1  |                     |
| 1096 | 1073 | 1074 | ar |                     |
| 1097 | 1073 | 1076 | ar |                     |
| 1098 | 1074 | 1075 | 1  |                     |
| 1099 | 1074 | 1078 | ar |                     |
| 1100 | 1076 | 1077 | 1  |                     |
| 1101 | 1076 | 1080 | ar |                     |
| 1102 | 1078 | 1079 | 1  |                     |
| 1103 | 1078 | 1082 | ar |                     |
| 1104 | 1080 | 1081 | 1  |                     |
| 1105 | 1080 | 1082 | ar |                     |
| 1106 | 1082 | 1083 | 1  |                     |
| 1107 | 1083 | 1084 | 1  |                     |
| 1108 | 1085 | 1086 | 1  | BACKBONE            |
| 1109 | 1085 | 1096 | 1  |                     |
| 1110 | 1086 | 1087 | 1  |                     |
| 1111 | 1086 | 1088 | 1  | BACKBONE            |
| 1112 | 1086 | 1090 | 1  |                     |
| 1113 | 1088 | 1089 | 2  | BACKBONE            |
| 1114 | 1088 | 1099 | am | BACKBONE   INTERRES |
| 1115 | 1090 | 1091 | 1  |                     |
| 1116 | 1090 | 1092 | 1  |                     |
| 1117 | 1090 | 1093 | 1  |                     |

|      |      |      |    |                     |
|------|------|------|----|---------------------|
| 1118 | 1093 | 1094 | 1  |                     |
| 1119 | 1093 | 1095 | 1  |                     |
| 1120 | 1093 | 1096 | 1  |                     |
| 1121 | 1096 | 1097 | 1  |                     |
| 1122 | 1096 | 1098 | 1  |                     |
| 1123 | 1099 | 1100 | 1  |                     |
| 1124 | 1099 | 1101 | 1  | BACKBONE            |
| 1125 | 1101 | 1102 | 1  |                     |
| 1126 | 1101 | 1103 | 1  |                     |
| 1127 | 1101 | 1104 | 1  | BACKBONE            |
| 1128 | 1104 | 1105 | 2  | BACKBONE            |
| 1129 | 1104 | 1106 | am | BACKBONE   INTERRES |
| 1130 | 1106 | 1107 | 1  |                     |
| 1131 | 1106 | 1108 | 1  | BACKBONE            |
| 1132 | 1108 | 1109 | 1  |                     |
| 1133 | 1108 | 1110 | 1  | BACKBONE            |
| 1134 | 1108 | 1112 | 1  |                     |
| 1135 | 1110 | 1111 | 2  | BACKBONE            |
| 1136 | 1110 | 1116 | am | BACKBONE   INTERRES |
| 1137 | 1112 | 1113 | 1  |                     |
| 1138 | 1112 | 1114 | 1  |                     |
| 1139 | 1112 | 1115 | 1  |                     |
| 1140 | 1116 | 1117 | 1  |                     |
| 1141 | 1116 | 1118 | 1  | BACKBONE            |
| 1142 | 1118 | 1119 | 1  |                     |
| 1143 | 1118 | 1120 | 1  | BACKBONE            |
| 1144 | 1118 | 1122 | 1  |                     |
| 1145 | 1120 | 1121 | 2  | BACKBONE            |
| 1146 | 1120 | 1138 | am | BACKBONE   INTERRES |
| 1147 | 1122 | 1123 | 1  |                     |
| 1148 | 1122 | 1124 | 1  |                     |
| 1149 | 1122 | 1125 | 1  |                     |
| 1150 | 1125 | 1126 | 1  |                     |
| 1151 | 1125 | 1127 | 1  |                     |
| 1152 | 1125 | 1128 | 1  |                     |
| 1153 | 1128 | 1129 | 1  |                     |
| 1154 | 1128 | 1130 | 1  |                     |
| 1155 | 1128 | 1131 | 1  |                     |
| 1156 | 1131 | 1132 | 1  |                     |
| 1157 | 1131 | 1133 | 1  |                     |
| 1158 | 1131 | 1134 | 1  |                     |
| 1159 | 1134 | 1135 | 1  |                     |
| 1160 | 1134 | 1136 | 1  |                     |
| 1161 | 1134 | 1137 | 1  |                     |
| 1162 | 1138 | 1139 | 1  |                     |
| 1163 | 1138 | 1140 | 1  | BACKBONE            |
| 1164 | 1140 | 1141 | 1  |                     |
| 1165 | 1140 | 1142 | 1  | BACKBONE            |
| 1166 | 1140 | 1144 | 1  |                     |
| 1167 | 1142 | 1143 | 2  | BACKBONE            |
| 1168 | 1142 | 1159 | am | BACKBONE   INTERRES |
| 1169 | 1144 | 1145 | 1  |                     |



|      |      |      |    |                     |
|------|------|------|----|---------------------|
| 1170 | 1144 | 1146 | 1  |                     |
| 1171 | 1144 | 1147 | 1  |                     |
| 1172 | 1147 | 1148 | ar |                     |
| 1173 | 1147 | 1150 | ar |                     |
| 1174 | 1148 | 1149 | 1  |                     |
| 1175 | 1148 | 1152 | ar |                     |
| 1176 | 1150 | 1151 | 1  |                     |
| 1177 | 1150 | 1154 | ar |                     |
| 1178 | 1152 | 1153 | 1  |                     |
| 1179 | 1152 | 1156 | ar |                     |
| 1180 | 1154 | 1155 | 1  |                     |
| 1181 | 1154 | 1156 | ar |                     |
| 1182 | 1156 | 1157 | 1  |                     |
| 1183 | 1157 | 1158 | 1  |                     |
| 1184 | 1159 | 1160 | 1  |                     |
| 1185 | 1159 | 1161 | 1  | BACKBONE            |
| 1186 | 1161 | 1162 | 1  |                     |
| 1187 | 1161 | 1163 | 1  | BACKBONE            |
| 1188 | 1161 | 1165 | 1  |                     |
| 1189 | 1163 | 1164 | 2  | BACKBONE            |
| 1190 | 1163 | 1178 | am | BACKBONE   INTERRES |
| 1191 | 1165 | 1166 | 1  |                     |
| 1192 | 1165 | 1167 | 1  |                     |
| 1193 | 1165 | 1168 | 1  |                     |
| 1194 | 1168 | 1169 | 1  |                     |
| 1195 | 1168 | 1170 | 1  |                     |
| 1196 | 1168 | 1174 | 1  |                     |
| 1197 | 1170 | 1171 | 1  |                     |
| 1198 | 1170 | 1172 | 1  |                     |
| 1199 | 1170 | 1173 | 1  |                     |
| 1200 | 1174 | 1175 | 1  |                     |
| 1201 | 1174 | 1176 | 1  |                     |
| 1202 | 1174 | 1177 | 1  |                     |
| 1203 | 1178 | 1179 | 1  |                     |
| 1204 | 1178 | 1180 | 1  | BACKBONE            |
| 1205 | 1180 | 1181 | 1  |                     |
| 1206 | 1180 | 1182 | 1  | BACKBONE            |
| 1207 | 1180 | 1184 | 1  |                     |
| 1208 | 1182 | 1183 | 2  | BACKBONE            |
| 1209 | 1182 | 1197 | am | BACKBONE   INTERRES |
| 1210 | 1184 | 1185 | 1  |                     |
| 1211 | 1184 | 1186 | 1  |                     |
| 1212 | 1184 | 1187 | 1  |                     |
| 1213 | 1187 | 1188 | 1  |                     |
| 1214 | 1187 | 1189 | 1  |                     |
| 1215 | 1187 | 1193 | 1  |                     |
| 1216 | 1189 | 1190 | 1  |                     |
| 1217 | 1189 | 1191 | 1  |                     |
| 1218 | 1189 | 1192 | 1  |                     |
| 1219 | 1193 | 1194 | 1  |                     |
| 1220 | 1193 | 1195 | 1  |                     |
| 1221 | 1193 | 1196 | 1  |                     |

|      |      |      |    |                     |
|------|------|------|----|---------------------|
| 1222 | 1197 | 1198 | 1  |                     |
| 1223 | 1197 | 1199 | 1  | BACKBONE            |
| 1224 | 1199 | 1200 | 1  |                     |
| 1225 | 1199 | 1201 | 1  | BACKBONE            |
| 1226 | 1199 | 1203 | 1  |                     |
| 1227 | 1201 | 1202 | 2  | BACKBONE            |
| 1228 | 1201 | 1212 | am | BACKBONE   INTERRES |
| 1229 | 1203 | 1204 | 1  |                     |
| 1230 | 1203 | 1205 | 1  |                     |
| 1231 | 1203 | 1206 | 1  |                     |
| 1232 | 1206 | 1207 | 1  |                     |
| 1233 | 1206 | 1208 | 1  |                     |
| 1234 | 1206 | 1209 | 1  |                     |
| 1235 | 1209 | 1210 | ar |                     |
| 1236 | 1209 | 1211 | ar |                     |
| 1237 | 1212 | 1213 | 1  |                     |
| 1238 | 1212 | 1214 | 1  | BACKBONE            |
| 1239 | 1214 | 1215 | 1  |                     |
| 1240 | 1214 | 1216 | 1  | BACKBONE            |
| 1241 | 1214 | 1218 | 1  |                     |
| 1242 | 1216 | 1217 | 2  | BACKBONE            |
| 1243 | 1216 | 1229 | am | BACKBONE   INTERRES |
| 1244 | 1218 | 1219 | 1  |                     |
| 1245 | 1218 | 1220 | 1  |                     |
| 1246 | 1218 | 1221 | 1  |                     |
| 1247 | 1221 | 1222 | 1  |                     |
| 1248 | 1221 | 1223 | 1  |                     |
| 1249 | 1221 | 1224 | 1  |                     |
| 1250 | 1224 | 1225 | am |                     |
| 1251 | 1224 | 1228 | 2  |                     |
| 1252 | 1225 | 1226 | 1  |                     |
| 1253 | 1225 | 1227 | 1  |                     |
| 1254 | 1229 | 1230 | 1  |                     |
| 1255 | 1229 | 1231 | 1  | BACKBONE            |
| 1256 | 1231 | 1232 | 1  |                     |
| 1257 | 1231 | 1233 | 1  | BACKBONE            |
| 1258 | 1231 | 1235 | 1  |                     |
| 1259 | 1233 | 1234 | 2  | BACKBONE            |
| 1260 | 1233 | 1251 | am | BACKBONE   INTERRES |
| 1261 | 1235 | 1236 | 1  |                     |
| 1262 | 1235 | 1237 | 1  |                     |
| 1263 | 1235 | 1238 | 1  |                     |
| 1264 | 1238 | 1239 | 1  |                     |
| 1265 | 1238 | 1240 | 1  |                     |
| 1266 | 1238 | 1241 | 1  |                     |
| 1267 | 1241 | 1242 | 1  |                     |
| 1268 | 1241 | 1243 | 1  |                     |
| 1269 | 1241 | 1244 | 1  |                     |
| 1270 | 1244 | 1245 | 1  |                     |
| 1271 | 1244 | 1246 | 1  |                     |
| 1272 | 1244 | 1247 | 1  |                     |
| 1273 | 1247 | 1248 | 1  |                     |

|      |      |      |    |                     |
|------|------|------|----|---------------------|
| 1274 | 1247 | 1249 | 1  |                     |
| 1275 | 1247 | 1250 | 1  |                     |
| 1276 | 1251 | 1252 | 1  |                     |
| 1277 | 1251 | 1253 | 1  | BACKBONE            |
| 1278 | 1253 | 1254 | 1  |                     |
| 1279 | 1253 | 1255 | 1  |                     |
| 1280 | 1253 | 1256 | 1  | BACKBONE            |
| 1281 | 1256 | 1257 | 2  | BACKBONE            |
| 1282 | 1256 | 1258 | am | BACKBONE   INTERRES |
| 1283 | 1258 | 1259 | 1  |                     |
| 1284 | 1258 | 1260 | 1  | BACKBONE            |
| 1285 | 1260 | 1261 | 1  |                     |
| 1286 | 1260 | 1262 | 1  | BACKBONE            |
| 1287 | 1260 | 1264 | 1  |                     |
| 1288 | 1262 | 1263 | 2  | BACKBONE            |
| 1289 | 1262 | 1275 | am | BACKBONE   INTERRES |
| 1290 | 1264 | 1265 | 1  |                     |
| 1291 | 1264 | 1266 | 1  |                     |
| 1292 | 1264 | 1267 | 1  |                     |
| 1293 | 1267 | 1268 | 1  |                     |
| 1294 | 1267 | 1269 | 1  |                     |
| 1295 | 1267 | 1270 | 1  |                     |
| 1296 | 1270 | 1271 | am |                     |
| 1297 | 1270 | 1274 | 2  |                     |
| 1298 | 1271 | 1272 | 1  |                     |
| 1299 | 1271 | 1273 | 1  |                     |
| 1300 | 1275 | 1276 | 1  |                     |
| 1301 | 1275 | 1277 | 1  | BACKBONE            |
| 1302 | 1277 | 1278 | 1  |                     |
| 1303 | 1277 | 1279 | 1  | BACKBONE            |
| 1304 | 1277 | 1281 | 1  |                     |
| 1305 | 1279 | 1280 | 2  | BACKBONE            |
| 1306 | 1279 | 1290 | am | BACKBONE   INTERRES |
| 1307 | 1281 | 1282 | 1  |                     |
| 1308 | 1281 | 1283 | 1  |                     |
| 1309 | 1281 | 1284 | 1  |                     |
| 1310 | 1284 | 1285 | 1  |                     |
| 1311 | 1284 | 1286 | 1  |                     |
| 1312 | 1284 | 1287 | 1  |                     |
| 1313 | 1287 | 1288 | ar |                     |
| 1314 | 1287 | 1289 | ar |                     |
| 1315 | 1290 | 1291 | 1  |                     |
| 1316 | 1290 | 1292 | 1  | BACKBONE            |
| 1317 | 1292 | 1293 | 1  |                     |
| 1318 | 1292 | 1294 | 1  | BACKBONE            |
| 1319 | 1292 | 1296 | 1  |                     |
| 1320 | 1294 | 1295 | 2  | BACKBONE            |
| 1321 | 1294 | 1311 | am | BACKBONE   INTERRES |
| 1322 | 1296 | 1297 | 1  |                     |
| 1323 | 1296 | 1298 | 1  |                     |
| 1324 | 1296 | 1299 | 1  |                     |
| 1325 | 1299 | 1300 | ar |                     |

|      |      |      |    |                     |
|------|------|------|----|---------------------|
| 1326 | 1299 | 1302 | ar |                     |
| 1327 | 1300 | 1301 | 1  |                     |
| 1328 | 1300 | 1304 | ar |                     |
| 1329 | 1302 | 1303 | 1  |                     |
| 1330 | 1302 | 1306 | ar |                     |
| 1331 | 1304 | 1305 | 1  |                     |
| 1332 | 1304 | 1308 | ar |                     |
| 1333 | 1306 | 1307 | 1  |                     |
| 1334 | 1306 | 1308 | ar |                     |
| 1335 | 1308 | 1309 | 1  |                     |
| 1336 | 1309 | 1310 | 1  |                     |
| 1337 | 1311 | 1312 | 1  |                     |
| 1338 | 1311 | 1313 | 1  | BACKBONE            |
| 1339 | 1313 | 1314 | 1  |                     |
| 1340 | 1313 | 1315 | 1  | BACKBONE            |
| 1341 | 1313 | 1317 | 1  |                     |
| 1342 | 1315 | 1316 | 2  | BACKBONE            |
| 1343 | 1315 | 1330 | am | BACKBONE   INTERRES |
| 1344 | 1317 | 1318 | 1  |                     |
| 1345 | 1317 | 1319 | 1  |                     |
| 1346 | 1317 | 1322 | 1  |                     |
| 1347 | 1319 | 1320 | 1  |                     |
| 1348 | 1319 | 1321 | 1  |                     |
| 1349 | 1319 | 1326 | 1  |                     |
| 1350 | 1322 | 1323 | 1  |                     |
| 1351 | 1322 | 1324 | 1  |                     |
| 1352 | 1322 | 1325 | 1  |                     |
| 1353 | 1326 | 1327 | 1  |                     |
| 1354 | 1326 | 1328 | 1  |                     |
| 1355 | 1326 | 1329 | 1  |                     |
| 1356 | 1330 | 1331 | 1  |                     |
| 1357 | 1330 | 1332 | 1  | BACKBONE            |
| 1358 | 1332 | 1333 | 1  |                     |
| 1359 | 1332 | 1334 | 1  | BACKBONE            |
| 1360 | 1332 | 1336 | 1  |                     |
| 1361 | 1334 | 1335 | 2  | BACKBONE            |
| 1362 | 1334 | 1344 | am | BACKBONE   INTERRES |
| 1363 | 1336 | 1337 | 1  |                     |
| 1364 | 1336 | 1338 | 1  |                     |
| 1365 | 1336 | 1339 | 1  |                     |
| 1366 | 1339 | 1340 | 2  |                     |
| 1367 | 1339 | 1341 | am |                     |
| 1368 | 1341 | 1342 | 1  |                     |
| 1369 | 1341 | 1343 | 1  |                     |
| 1370 | 1344 | 1345 | 1  |                     |
| 1371 | 1344 | 1346 | 1  | BACKBONE            |
| 1372 | 1346 | 1347 | 1  |                     |
| 1373 | 1346 | 1348 | 1  | BACKBONE            |
| 1374 | 1346 | 1350 | 1  |                     |
| 1375 | 1348 | 1349 | 2  | BACKBONE            |
| 1376 | 1348 | 1358 | am | BACKBONE   INTERRES |
| 1377 | 1350 | 1351 | 1  |                     |

|      |      |      |    |                     |
|------|------|------|----|---------------------|
| 1378 | 1350 | 1352 | 1  |                     |
| 1379 | 1350 | 1353 | 1  |                     |
| 1380 | 1353 | 1354 | am |                     |
| 1381 | 1353 | 1357 | 2  |                     |
| 1382 | 1354 | 1355 | 1  |                     |
| 1383 | 1354 | 1356 | 1  |                     |
| 1384 | 1358 | 1359 | 1  |                     |
| 1385 | 1358 | 1360 | 1  | BACKBONE            |
| 1386 | 1360 | 1361 | 1  |                     |
| 1387 | 1360 | 1362 | 1  | BACKBONE            |
| 1388 | 1360 | 1364 | 1  |                     |
| 1389 | 1362 | 1363 | 2  | BACKBONE            |
| 1390 | 1362 | 1377 | am | BACKBONE   INTERRES |
| 1391 | 1364 | 1365 | 1  |                     |
| 1392 | 1364 | 1366 | 1  |                     |
| 1393 | 1364 | 1369 | 1  |                     |
| 1394 | 1366 | 1367 | 1  |                     |
| 1395 | 1366 | 1368 | 1  |                     |
| 1396 | 1366 | 1373 | 1  |                     |
| 1397 | 1369 | 1370 | 1  |                     |
| 1398 | 1369 | 1371 | 1  |                     |
| 1399 | 1369 | 1372 | 1  |                     |
| 1400 | 1373 | 1374 | 1  |                     |
| 1401 | 1373 | 1375 | 1  |                     |
| 1402 | 1373 | 1376 | 1  |                     |
| 1403 | 1377 | 1378 | 1  |                     |
| 1404 | 1377 | 1379 | 1  | BACKBONE            |
| 1405 | 1379 | 1380 | 1  |                     |
| 1406 | 1379 | 1381 | 1  | BACKBONE            |
| 1407 | 1379 | 1383 | 1  |                     |
| 1408 | 1381 | 1382 | 2  | BACKBONE            |
| 1409 | 1381 | 1394 | am | BACKBONE   INTERRES |
| 1410 | 1383 | 1384 | 1  |                     |
| 1411 | 1383 | 1385 | 1  |                     |
| 1412 | 1383 | 1386 | 1  |                     |
| 1413 | 1386 | 1387 | 1  |                     |
| 1414 | 1386 | 1388 | 2  |                     |
| 1415 | 1387 | 1390 | 2  |                     |
| 1416 | 1388 | 1389 | 1  |                     |
| 1417 | 1388 | 1392 | 1  |                     |
| 1418 | 1390 | 1391 | 1  |                     |
| 1419 | 1390 | 1392 | 1  |                     |
| 1420 | 1392 | 1393 | 1  |                     |
| 1421 | 1394 | 1395 | 1  |                     |
| 1422 | 1394 | 1396 | 1  | BACKBONE            |
| 1423 | 1396 | 1397 | 1  |                     |
| 1424 | 1396 | 1398 | 1  | BACKBONE            |
| 1425 | 1396 | 1400 | 1  |                     |
| 1426 | 1398 | 1399 | 2  | BACKBONE            |
| 1427 | 1398 | 1413 | am | BACKBONE   INTERRES |
| 1428 | 1400 | 1401 | 1  |                     |
| 1429 | 1400 | 1402 | 1  |                     |

|      |      |      |    |          |
|------|------|------|----|----------|
| 1430 | 1400 | 1403 | 1  |          |
| 1431 | 1403 | 1404 | 1  |          |
| 1432 | 1403 | 1405 | 1  |          |
| 1433 | 1403 | 1409 | 1  |          |
| 1434 | 1405 | 1406 | 1  |          |
| 1435 | 1405 | 1407 | 1  |          |
| 1436 | 1405 | 1408 | 1  |          |
| 1437 | 1409 | 1410 | 1  |          |
| 1438 | 1409 | 1411 | 1  |          |
| 1439 | 1409 | 1412 | 1  |          |
| 1440 | 1413 | 1414 | 1  |          |
| 1441 | 1413 | 1415 | 1  | BACKBONE |
| 1442 | 1415 | 1416 | 1  |          |
| 1443 | 1415 | 1417 | 1  | BACKBONE |
| 1444 | 1415 | 1420 | 1  |          |
| 1445 | 1417 | 1418 | 1  |          |
| 1446 | 1417 | 1419 | 2  | BACKBONE |
| 1447 | 1420 | 1421 | 1  |          |
| 1448 | 1420 | 1422 | 1  |          |
| 1449 | 1420 | 1424 | 1  |          |
| 1450 | 1422 | 1423 | 1  |          |
| 1451 | 1424 | 1425 | 1  |          |
| 1452 | 1424 | 1426 | 1  |          |
| 1453 | 1424 | 1427 | 1  |          |
| 1454 | 1428 | 1432 | 1  |          |
| 1455 | 1429 | 1430 | 1  |          |
| 1456 | 1430 | 1431 | 1  |          |
| 1457 | 1430 | 1432 | 1  |          |
| 1458 | 1431 | 1433 | 2  |          |
| 1459 | 1431 | 1436 | am |          |
| 1460 | 1434 | 1435 | 1  |          |
| 1461 | 1434 | 1436 | 1  |          |
| 1462 | 1434 | 1438 | 1  |          |
| 1463 | 1435 | 1437 | 2  |          |
| 1464 | 1435 | 1439 | am |          |
| 1465 | 1438 | 1457 | 1  |          |
| 1466 | 1439 | 1440 | 1  |          |
| 1467 | 1439 | 1443 | 1  |          |
| 1468 | 1440 | 1441 | 1  |          |
| 1469 | 1441 | 1442 | 1  |          |
| 1470 | 1442 | 1443 | 1  |          |
| 1471 | 1443 | 1444 | 1  |          |
| 1472 | 1444 | 1445 | am |          |
| 1473 | 1444 | 1447 | 2  |          |
| 1474 | 1445 | 1446 | 1  |          |
| 1475 | 1446 | 1448 | 1  |          |
| 1476 | 1446 | 1451 | 1  |          |
| 1477 | 1448 | 1449 | ar |          |
| 1478 | 1448 | 1452 | ar |          |
| 1479 | 1449 | 1450 | 1  |          |
| 1480 | 1449 | 1455 | ar |          |
| 1481 | 1450 | 1451 | 1  |          |

1482 1452 1453 ar  
 1483 1453 1454 ar  
 1484 1454 1455 ar  
 1485 1455 1456 1  
 1486 1457 1458 ar  
 1487 1457 1462 ar  
 1488 1458 1459 ar  
 1489 1459 1460 ar  
 1490 1460 1461 ar  
 1491 1460 1463 1  
 1492 1461 1462 ar  
 1493 1463 1464 1  
 1494 1464 1465 2  
 1495 1464 1466 2

@<TRIPOS>SUBSTRUCTURE

|    |        |     |         |   |    |     |   |
|----|--------|-----|---------|---|----|-----|---|
| 1  | LEU256 | 4   | RESIDUE | 4 | B1 | LEU | 1 |
| 2  | PRO257 | 22  | RESIDUE | 4 | B1 | PRO | 2 |
| 3  | ARG258 | 37  | RESIDUE | 4 | B1 | ARG | 2 |
| 4  | ASN259 | 61  | RESIDUE | 4 | B1 | ASN | 2 |
| 5  | PRO260 | 74  | RESIDUE | 4 | B1 | PRO | 2 |
| 6  | SER261 | 89  | RESIDUE | 4 | B1 | SER | 2 |
| 7  | MET262 | 100 | RESIDUE | 4 | B1 | MET | 2 |
| 8  | ALA263 | 117 | RESIDUE | 4 | B1 | ALA | 2 |
| 9  | ASP264 | 127 | RESIDUE | 4 | B1 | ASP | 2 |
| 10 | TYR265 | 139 | RESIDUE | 4 | B1 | TYR | 2 |
| 11 | GLU266 | 160 | RESIDUE | 4 | B1 | GLU | 2 |
| 12 | ALA267 | 175 | RESIDUE | 4 | B1 | ALA | 2 |
| 13 | ARG268 | 185 | RESIDUE | 4 | B1 | ARG | 2 |
| 14 | ILE269 | 209 | RESIDUE | 4 | B1 | ILE | 2 |
| 15 | PHE270 | 228 | RESIDUE | 4 | B1 | PHE | 2 |
| 16 | THR271 | 248 | RESIDUE | 4 | B1 | THR | 2 |
| 17 | PHE272 | 262 | RESIDUE | 4 | B1 | PHE | 2 |
| 18 | GLY273 | 282 | RESIDUE | 4 | B1 | GLY | 2 |
| 19 | THR274 | 289 | RESIDUE | 4 | B1 | THR | 2 |
| 20 | TRP275 | 303 | RESIDUE | 4 | B1 | TRP | 2 |
| 21 | ILE276 | 327 | RESIDUE | 4 | B1 | ILE | 2 |
| 22 | TYR277 | 346 | RESIDUE | 4 | B1 | TYR | 2 |
| 23 | SER278 | 367 | RESIDUE | 4 | B1 | SER | 2 |
| 24 | VAL279 | 378 | RESIDUE | 4 | B1 | VAL | 2 |
| 25 | ASN280 | 394 | RESIDUE | 4 | B1 | ASN | 2 |
| 26 | LYS281 | 408 | RESIDUE | 4 | B1 | LYS | 2 |
| 27 | GLU282 | 430 | RESIDUE | 4 | B1 | GLU | 2 |
| 28 | GLN283 | 445 | RESIDUE | 4 | B1 | GLN | 2 |
| 29 | LEU284 | 462 | RESIDUE | 4 | B1 | LEU | 2 |
| 30 | ALA285 | 481 | RESIDUE | 4 | B1 | ALA | 2 |
| 31 | ARG286 | 491 | RESIDUE | 4 | B1 | ARG | 2 |
| 32 | ALA287 | 515 | RESIDUE | 4 | B1 | ALA | 2 |
| 33 | GLY288 | 525 | RESIDUE | 4 | B1 | GLY | 2 |
| 34 | PHE289 | 532 | RESIDUE | 4 | B1 | PHE | 2 |
| 35 | TYR290 | 552 | RESIDUE | 4 | B1 | TYR | 2 |
| 36 | ALA291 | 573 | RESIDUE | 4 | B1 | ALA | 2 |
| 37 | LEU292 | 583 | RESIDUE | 4 | B1 | LEU | 2 |

|    |        |      |         |   |    |     |   |
|----|--------|------|---------|---|----|-----|---|
| 38 | GLY293 | 602  | RESIDUE | 4 | B1 | GLY | 2 |
| 39 | GLU294 | 609  | RESIDUE | 4 | B1 | GLU | 2 |
| 40 | GLY295 | 624  | RESIDUE | 4 | B1 | GLY | 2 |
| 41 | ASP296 | 631  | RESIDUE | 4 | B1 | ASP | 2 |
| 42 | LYS297 | 643  | RESIDUE | 4 | B1 | LYS | 2 |
| 43 | VAL298 | 665  | RESIDUE | 4 | B1 | VAL | 2 |
| 44 | LYS299 | 681  | RESIDUE | 4 | B1 | LYS | 2 |
| 45 | CYS300 | 703  | RESIDUE | 4 | B1 | CYS | 2 |
| 46 | PHE301 | 713  | RESIDUE | 4 | B1 | PHE | 2 |
| 47 | HIS302 | 733  | RESIDUE | 4 | B1 | HIS | 2 |
| 48 | CYS303 | 750  | RESIDUE | 4 | B1 | CYS | 2 |
| 49 | GLY304 | 760  | RESIDUE | 4 | B1 | GLY | 2 |
| 50 | GLY305 | 767  | RESIDUE | 4 | B1 | GLY | 2 |
| 51 | GLY306 | 774  | RESIDUE | 4 | B1 | GLY | 2 |
| 52 | LEU307 | 781  | RESIDUE | 4 | B1 | LEU | 2 |
| 53 | THR308 | 800  | RESIDUE | 4 | B1 | THR | 2 |
| 54 | ASP309 | 814  | RESIDUE | 4 | B1 | ASP | 2 |
| 55 | TRP310 | 826  | RESIDUE | 4 | B1 | TRP | 2 |
| 56 | LYS311 | 850  | RESIDUE | 4 | B1 | LYS | 3 |
| 57 | PRO312 | 870  | RESIDUE | 4 | B1 | PRO | 2 |
| 58 | SER313 | 885  | RESIDUE | 4 | B1 | SER | 2 |
| 59 | GLU314 | 896  | RESIDUE | 4 | B1 | GLU | 2 |
| 60 | ASP315 | 911  | RESIDUE | 4 | B1 | ASP | 2 |
| 61 | PRO316 | 922  | RESIDUE | 4 | B1 | PRO | 2 |
| 62 | TRP317 | 937  | RESIDUE | 4 | B1 | TRP | 2 |
| 63 | GLU318 | 961  | RESIDUE | 4 | B1 | GLU | 2 |
| 64 | GLN319 | 976  | RESIDUE | 4 | B1 | GLN | 2 |
| 65 | HIS320 | 993  | RESIDUE | 4 | B1 | HIS | 2 |
| 66 | ALA321 | 1010 | RESIDUE | 4 | B1 | ALA | 2 |
| 67 | LYS322 | 1020 | RESIDUE | 4 | B1 | LYS | 2 |
| 68 | TRP323 | 1042 | RESIDUE | 4 | B1 | TRP | 2 |
| 69 | TYR324 | 1066 | RESIDUE | 4 | B1 | TYR | 2 |
| 70 | PRO325 | 1086 | RESIDUE | 4 | B1 | PRO | 2 |
| 71 | GLY326 | 1101 | RESIDUE | 4 | B1 | GLY | 2 |
| 72 | CYS327 | 1108 | RESIDUE | 4 | B1 | CYS | 2 |
| 73 | LYS328 | 1118 | RESIDUE | 4 | B1 | LYS | 2 |
| 74 | TYR329 | 1140 | RESIDUE | 4 | B1 | TYR | 2 |
| 75 | LEU330 | 1161 | RESIDUE | 4 | B1 | LEU | 2 |
| 76 | LEU331 | 1180 | RESIDUE | 4 | B1 | LEU | 2 |
| 77 | GLU332 | 1199 | RESIDUE | 4 | B1 | GLU | 2 |
| 78 | GLN333 | 1214 | RESIDUE | 4 | B1 | GLN | 2 |
| 79 | LYS334 | 1231 | RESIDUE | 4 | B1 | LYS | 2 |
| 80 | GLY335 | 1253 | RESIDUE | 4 | B1 | GLY | 2 |
| 81 | GLN336 | 1260 | RESIDUE | 4 | B1 | GLN | 2 |
| 82 | GLU337 | 1277 | RESIDUE | 4 | B1 | GLU | 2 |
| 83 | TYR338 | 1292 | RESIDUE | 4 | B1 | TYR | 2 |
| 84 | ILE339 | 1313 | RESIDUE | 4 | B1 | ILE | 2 |
| 85 | ASN340 | 1332 | RESIDUE | 4 | B1 | ASN | 2 |
| 86 | ASN341 | 1346 | RESIDUE | 4 | B1 | ASN | 2 |
| 87 | ILE342 | 1360 | RESIDUE | 4 | B1 | ILE | 2 |
| 88 | HIS343 | 1379 | RESIDUE | 4 | B1 | HIS | 2 |
| 89 | LEU344 | 1396 | RESIDUE | 4 | B1 | LEU | 2 |



```
90 THR345 1415 RESIDUE 4 B1 THR 1
91 **** 1435 GROUP 4 B2 **** 1

# MOE 2019.01 (io_trps.svl 2018.10)
```

## XIAP-BIR3 + compound 2 .mol2 file

@<TRIPOS>MOLECULE

COVALENT\_142D6\_3HL5\_XIAP.A

1570 1601 94 0 0

BIOPOLYMER

USER\_CHARGES

@<TRIPOS>ATOM

|          |         |         |          |       |   |        |         |
|----------|---------|---------|----------|-------|---|--------|---------|
| 1 N      | -0.8904 | 2.4146  | -11.0087 | N.3   | 1 | SER253 | -0.3650 |
| BACKBONE |         |         |          |       |   |        |         |
| 2 CA     | -2.0137 | 3.1422  | -10.4199 | C.3   | 1 | SER253 | 0.1280  |
| BACKBONE |         |         |          |       |   |        |         |
| 3 C      | -2.4644 | 2.5385  | -9.1021  | C.2   | 1 | SER253 | 0.2007  |
| BACKBONE |         |         |          |       |   |        |         |
| 4 O      | -3.6299 | 2.6852  | -8.7594  | O.2   | 1 | SER253 | -0.3948 |
| BACKBONE |         |         |          |       |   |        |         |
| 5 CB     | -3.1695 | 3.1056  | -11.4592 | C.3   | 1 | SER253 | 0.0792  |
| 6 OG     | -3.7021 | 1.7711  | -11.5336 | O.3   | 1 | SER253 | -0.3908 |
| 7 H      | -0.9771 | 1.4234  | -11.1354 | H     | 1 | SER253 | 0.1394  |
| 8 HA     | -1.7352 | 4.1906  | -10.2199 | H     | 1 | SER253 | 0.0759  |
| 9 HB3    | -2.7838 | 3.4097  | -12.4465 | H     | 1 | SER253 | 0.0601  |
| 10 HB2   | -3.9667 | 3.8080  | -11.1755 | H     | 1 | SER253 | 0.0601  |
| 11 HG    | -4.4079 | 1.6673  | -12.1677 | H     | 1 | SER253 | 0.2097  |
| 12 NCAP  | -0.1014 | 2.9244  | -11.3720 | H     | 1 | SER253 | 0.1394  |
| 13 N     | -1.5708 | 1.8689  | -8.3420  | N.am  | 2 | HIS254 | -0.2622 |
| BACKBONE |         |         |          |       |   |        |         |
| 14 CA    | -1.9988 | 1.1380  | -7.1402  | C.3   | 2 | HIS254 | 0.1421  |
| BACKBONE |         |         |          |       |   |        |         |
| 15 C     | -1.9946 | 2.0367  | -5.9113  | C.2   | 2 | HIS254 | 0.2060  |
| BACKBONE |         |         |          |       |   |        |         |
| 16 O     | -1.4665 | 3.1334  | -5.9896  | O.2   | 2 | HIS254 | -0.3942 |
| BACKBONE |         |         |          |       |   |        |         |
| 17 CB    | -1.0458 | -0.0753 | -6.9298  | C.3   | 2 | HIS254 | 0.0427  |
| 18 CG    | -1.6463 | -1.2223 | -6.1446  | C.2   | 2 | HIS254 | 0.0561  |
| 19 ND1   | -2.3456 | -2.1918 | -6.6858  | N.pl3 | 2 | HIS254 | -0.2623 |
| 20 CD2   | -1.5503 | -1.4195 | -4.8161  | C.2   | 2 | HIS254 | -0.0276 |
| 21 CE1   | -2.7175 | -3.0341 | -5.7798  | C.2   | 2 | HIS254 | 0.0875  |
| 22 NE2   | -2.2925 | -2.6450 | -4.6635  | N.2   | 2 | HIS254 | -0.3437 |
| 23 H     | -0.5974 | 1.8711  | -8.5813  | H     | 2 | HIS254 | 0.1885  |
| 24 HA    | -3.0160 | 0.7413  | -7.2885  | H     | 2 | HIS254 | 0.0824  |
| 25 HB3   | -0.1169 | 0.2668  | -6.4444  | H     | 2 | HIS254 | 0.0491  |
| 26 HB2   | -0.7686 | -0.4939 | -7.9106  | H     | 2 | HIS254 | 0.0491  |
| 27 HD1   | -2.5635 | -2.2843 | -7.6913  | H     | 2 | HIS254 | 0.2386  |
| 28 HD2   | -1.0615 | -0.8315 | -4.0474  | H     | 2 | HIS254 | 0.0324  |
| 29 HE1   | -3.3027 | -3.9429 | -5.9366  | H     | 2 | HIS254 | 0.1149  |
| 30 N     | -2.5641 | 1.5959  | -4.7636  | N.am  | 3 | MET255 | -0.2636 |
| BACKBONE |         |         |          |       |   |        |         |
| 31 CA    | -2.5157 | 2.3870  | -3.5196  | C.3   | 3 | MET255 | 0.1317  |
| BACKBONE |         |         |          |       |   |        |         |

|          |         |         |              |          |         |
|----------|---------|---------|--------------|----------|---------|
| 32 C     | -1.3160 | 2.0300  | -2.6514 C.2  | 3 MET255 | 0.2039  |
| BACKBONE |         |         |              |          |         |
| 33 O     | -1.3997 | 2.2163  | -1.4481 O.2  | 3 MET255 | -0.3944 |
| BACKBONE |         |         |              |          |         |
| 34 CB    | -3.7939 | 2.0950  | -2.6788 C.3  | 3 MET255 | -0.0034 |
| 35 CG    | -5.1082 | 2.4841  | -3.4033 C.3  | 3 MET255 | -0.0024 |
| 36 SD    | -5.3884 | 4.2796  | -3.2303 S.o  | 3 MET255 | -0.1639 |
| 37 CE    | -7.1425 | 4.4041  | -3.7022 C.3  | 3 MET255 | -0.0181 |
| 38 H     | -3.0118 | 0.7009  | -4.7288 H    | 3 MET255 | 0.1883  |
| 39 HA    | -2.4745 | 3.4716  | -3.7128 H    | 3 MET255 | 0.0800  |
| 40 HB3   | -3.7744 | 2.6265  | -1.7111 H    | 3 MET255 | 0.0320  |
| 41 HB2   | -3.8057 | 1.0121  | -2.4649 H    | 3 MET255 | 0.0320  |
| 42 HG3   | -5.9398 | 1.9575  | -2.9063 H    | 3 MET255 | 0.0378  |
| 43 HG2   | -5.0963 | 2.2065  | -4.4690 H    | 3 MET255 | 0.0378  |
| 44 LPD2  | -5.2866 | 4.4876  | -2.5920 LP   | 3 MET255 | 0.0000  |
| 45 LPD1  | -4.9913 | 4.6357  | -3.6505 LP   | 3 MET255 | 0.0000  |
| 46 HE3   | -7.2330 | 4.3531  | -4.7955 H    | 3 MET255 | 0.0340  |
| 47 HE2   | -7.5312 | 5.3703  | -3.3488 H    | 3 MET255 | 0.0340  |
| 48 HE1   | -7.7360 | 3.5941  | -3.2513 H    | 3 MET255 | 0.0340  |
| 49 N     | -0.1870 | 1.5137  | -3.1863 N.am | 4 LEU256 | -0.2637 |
| BACKBONE |         |         |              |          |         |
| 50 CA    | 0.9549  | 1.1474  | -2.3363 C.3  | 4 LEU256 | 0.1314  |
| BACKBONE |         |         |              |          |         |
| 51 C     | 2.1448  | 1.8111  | -2.9933 C.2  | 4 LEU256 | 0.2064  |
| BACKBONE |         |         |              |          |         |
| 52 O     | 2.3768  | 1.4677  | -4.1428 O.2  | 4 LEU256 | -0.3942 |
| BACKBONE |         |         |              |          |         |
| 53 CB    | 1.1235  | -0.3993 | -2.3003 C.3  | 4 LEU256 | -0.0101 |
| 54 CG    | 2.3165  | -0.9258 | -1.4406 C.3  | 4 LEU256 | -0.0425 |
| 55 CD1   | 2.0790  | -0.7453 | 0.0870 C.3   | 4 LEU256 | -0.0625 |
| 56 CD2   | 2.5430  | -2.4397 | -1.7274 C.3  | 4 LEU256 | -0.0625 |
| 57 H     | -0.0813 | 1.3861  | -4.1723 H    | 4 LEU256 | 0.1883  |
| 58 HA    | 0.8042  | 1.4932  | -1.3070 H    | 4 LEU256 | 0.0800  |
| 59 HB3   | 1.2615  | -0.7264 | -3.3435 H    | 4 LEU256 | 0.0315  |
| 60 HB2   | 0.1942  | -0.8524 | -1.9165 H    | 4 LEU256 | 0.0315  |
| 61 HG    | 3.2333  | -0.3800 | -1.7277 H    | 4 LEU256 | 0.0298  |
| 62 HD13  | 1.9812  | 0.3094  | 0.3706 H     | 4 LEU256 | 0.0232  |
| 63 HD12  | 2.9293  | -1.1607 | 0.6507 H     | 4 LEU256 | 0.0232  |
| 64 HD11  | 1.1639  | -1.2722 | 0.4000 H     | 4 LEU256 | 0.0232  |
| 65 HD23  | 1.6475  | -3.0225 | -1.4582 H    | 4 LEU256 | 0.0232  |
| 66 HD22  | 3.3940  | -2.8231 | -1.1426 H    | 4 LEU256 | 0.0232  |
| 67 HD21  | 2.7612  | -2.6082 | -2.7935 H    | 4 LEU256 | 0.0232  |
| 68 N     | 2.9092  | 2.7659  | -2.4125 N.am | 5 PRO257 | -0.2498 |
| BACKBONE |         |         |              |          |         |
| 69 CA    | 3.9056  | 3.4335  | -3.2315 C.3  | 5 PRO257 | 0.1338  |
| BACKBONE |         |         |              |          |         |
| 70 C     | 4.9932  | 2.5128  | -3.7345 C.2  | 5 PRO257 | 0.2041  |
| BACKBONE |         |         |              |          |         |
| 71 O     | 5.4021  | 1.6204  | -3.0077 O.2  | 5 PRO257 | -0.3944 |
| BACKBONE |         |         |              |          |         |
| 72 CB    | 4.4625  | 4.4725  | -2.2324 C.3  | 5 PRO257 | -0.0104 |
| 73 CG    | 4.0889  | 3.9172  | -0.8387 C.3  | 5 PRO257 | -0.0281 |

|          |      |         |         |          |       |   |        |         |
|----------|------|---------|---------|----------|-------|---|--------|---------|
| 74       | CD   | 2.7068  | 3.2605  | -1.0551  | C.3   | 5 | PRO257 | 0.0369  |
| 75       | HA   | 3.3826  | 3.9096  | -4.0768  | H     | 5 | PRO257 | 0.0802  |
| 76       | HB3  | 3.9483  | 5.4341  | -2.3753  | H     | 5 | PRO257 | 0.0313  |
| 77       | HB2  | 5.5481  | 4.6109  | -2.3467  | H     | 5 | PRO257 | 0.0313  |
| 78       | HG2  | 4.8167  | 3.1354  | -0.5622  | H     | 5 | PRO257 | 0.0287  |
| 79       | HG3  | 4.0779  | 4.6947  | -0.0566  | H     | 5 | PRO257 | 0.0287  |
| 80       | HD2  | 2.5387  | 2.5030  | -0.2763  | H     | 5 | PRO257 | 0.0524  |
| 81       | HD3  | 1.9010  | 4.0139  | -1.0493  | H     | 5 | PRO257 | 0.0524  |
| 82       | N    | 5.4895  | 2.7098  | -4.9784  | N.am  | 6 | ARG258 | -0.2637 |
| BACKBONE |      |         |         |          |       |   |        |         |
| 83       | CA   | 6.5226  | 1.8023  | -5.4676  | C.3   | 6 | ARG258 | 0.1311  |
| BACKBONE |      |         |         |          |       |   |        |         |
| 84       | C    | 7.8520  | 2.0161  | -4.7815  | C.2   | 6 | ARG258 | 0.2040  |
| BACKBONE |      |         |         |          |       |   |        |         |
| 85       | O    | 8.6375  | 1.0817  | -4.8015  | O.2   | 6 | ARG258 | -0.3944 |
| BACKBONE |      |         |         |          |       |   |        |         |
| 86       | CB   | 6.7368  | 1.8954  | -7.0015  | C.3   | 6 | ARG258 | -0.0092 |
| 87       | CG   | 5.4867  | 1.4341  | -7.7970  | C.3   | 6 | ARG258 | -0.0156 |
| 88       | CD   | 5.7521  | 1.2952  | -9.3195  | C.3   | 6 | ARG258 | 0.0627  |
| 89       | NE   | 6.6629  | 0.1697  | -9.6028  | N.pl3 | 6 | ARG258 | -0.2723 |
| 90       | CZ   | 7.9659  | 0.2594  | -9.7853  | C.cat | 6 | ARG258 | 0.2882  |
| 91       | NH1  | 8.6421  | 1.3797  | -9.6783  | N.pl3 | 6 | ARG258 | -0.2849 |
| 92       | NH2  | 8.6303  | -0.8339 | -10.0849 | N.pl3 | 6 | ARG258 | -0.2849 |
| 93       | H    | 5.1809  | 3.4683  | -5.5674  | H     | 6 | ARG258 | 0.1883  |
| 94       | HA   | 6.2223  | 0.7669  | -5.2295  | H     | 6 | ARG258 | 0.0800  |
| 95       | HB3  | 7.5760  | 1.2321  | -7.2565  | H     | 6 | ARG258 | 0.0313  |
| 96       | HB2  | 7.0047  | 2.9288  | -7.2719  | H     | 6 | ARG258 | 0.0313  |
| 97       | HG3  | 4.6702  | 2.1546  | -7.6306  | H     | 6 | ARG258 | 0.0301  |
| 98       | HG2  | 5.1538  | 0.4546  | -7.4216  | H     | 6 | ARG258 | 0.0301  |
| 99       | HD3  | 6.0144  | 2.2546  | -9.7701  | H     | 6 | ARG258 | 0.0689  |
| 100      | HD2  | 4.7777  | 1.0469  | -9.7756  | H     | 6 | ARG258 | 0.0689  |
| 101      | HE   | 6.2158  | -0.7508 | -9.6942  | H     | 6 | ARG258 | 0.2642  |
| 102      | HH11 | 8.1874  | 2.2519  | -9.4188  | H     | 6 | ARG258 | 0.2615  |
| 103      | HH12 | 9.6590  | 1.4011  | -9.8264  | H     | 6 | ARG258 | 0.2615  |
| 104      | HH21 | 8.1606  | -1.7418 | -10.1774 | H     | 6 | ARG258 | 0.2615  |
| 105      | HH22 | 9.6527  | -0.8151 | -10.2336 | H     | 6 | ARG258 | 0.2615  |
| 106      | N    | 8.1574  | 3.1874  | -4.1775  | N.am  | 7 | ASN259 | -0.2616 |
| BACKBONE |      |         |         |          |       |   |        |         |
| 107      | CA   | 9.4359  | 3.3248  | -3.4723  | C.3   | 7 | ASN259 | 0.1478  |
| BACKBONE |      |         |         |          |       |   |        |         |
| 108      | C    | 9.2404  | 3.8978  | -2.0833  | C.2   | 7 | ASN259 | 0.2088  |
| BACKBONE |      |         |         |          |       |   |        |         |
| 109      | O    | 9.4655  | 5.0870  | -1.9074  | O.2   | 7 | ASN259 | -0.3940 |
| BACKBONE |      |         |         |          |       |   |        |         |
| 110      | CB   | 10.3923 | 4.2039  | -4.3135  | C.3   | 7 | ASN259 | 0.0773  |
| 111      | CG   | 11.7742 | 4.2215  | -3.7086  | C.2   | 7 | ASN259 | 0.1780  |
| 112      | OD1  | 12.0123 | 3.5220  | -2.7360  | O.2   | 7 | ASN259 | -0.3970 |
| 113      | ND2  | 12.7225 | 4.9971  | -4.2608  | N.am  | 7 | ASN259 | -0.3007 |
| 114      | H    | 7.5401  | 3.9825  | -4.2150  | H     | 7 | ASN259 | 0.1885  |
| 115      | HA   | 9.9499  | 2.3586  | -3.3502  | H     | 7 | ASN259 | 0.0826  |
| 116      | HB3  | 9.9964  | 5.2267  | -4.3832  | H     | 7 | ASN259 | 0.0551  |
| 117      | HB2  | 10.4629 | 3.7848  | -5.3293  | H     | 7 | ASN259 | 0.0551  |

|          |      |         |        |         |      |    |        |         |
|----------|------|---------|--------|---------|------|----|--------|---------|
| 118      | HD21 | 12.5293 | 5.5590 | -5.0632 | H    | 7  | ASN259 | 0.1814  |
| 119      | HD22 | 13.6375 | 4.9950 | -3.8571 | H    | 7  | ASN259 | 0.1814  |
| 120      | N    | 8.8385  | 3.1024 | -1.0589 | N.am | 8  | PRO260 | -0.2497 |
| BACKBONE |      |         |        |         |      |    |        |         |
| 121      | CA   | 8.7091  | 3.6537 | 0.2826  | C.3  | 8  | PRO260 | 0.1338  |
| BACKBONE |      |         |        |         |      |    |        |         |
| 122      | C    | 9.8787  | 4.4987 | 0.7336  | C.2  | 8  | PRO260 | 0.2042  |
| BACKBONE |      |         |        |         |      |    |        |         |
| 123      | O    | 9.6528  | 5.4968 | 1.4008  | O.2  | 8  | PRO260 | -0.3944 |
| BACKBONE |      |         |        |         |      |    |        |         |
| 124      | CB   | 8.5938  | 2.3407 | 1.0956  | C.3  | 8  | PRO260 | -0.0104 |
| 125      | CG   | 7.8599  | 1.3862 | 0.1251  | C.3  | 8  | PRO260 | -0.0281 |
| 126      | CD   | 8.5324  | 1.6874 | -1.2358 | C.3  | 8  | PRO260 | 0.0369  |
| 127      | HA   | 7.7708  | 4.2261 | 0.3379  | H    | 8  | PRO260 | 0.0802  |
| 128      | HB3  | 8.0661  | 2.4764 | 2.0535  | H    | 8  | PRO260 | 0.0313  |
| 129      | HB2  | 9.5983  | 1.9325 | 1.2964  | H    | 8  | PRO260 | 0.0313  |
| 130      | HG2  | 7.9335  | 0.3259 | 0.4171  | H    | 8  | PRO260 | 0.0287  |
| 131      | HG3  | 6.7955  | 1.6691 | 0.0822  | H    | 8  | PRO260 | 0.0287  |
| 132      | HD2  | 9.4600  | 1.0996 | -1.3364 | H    | 8  | PRO260 | 0.0524  |
| 133      | HD3  | 7.8503  | 1.4715 | -2.0730 | H    | 8  | PRO260 | 0.0524  |
| 134      | N    | 11.1386 | 4.1531 | 0.3854  | N.am | 9  | SER261 | -0.2616 |
| BACKBONE |      |         |        |         |      |    |        |         |
| 135      | CA   | 12.2572 | 4.9723 | 0.8593  | C.3  | 9  | SER261 | 0.1539  |
| BACKBONE |      |         |        |         |      |    |        |         |
| 136      | C    | 12.1485 | 6.4041 | 0.3793  | C.2  | 9  | SER261 | 0.2062  |
| BACKBONE |      |         |        |         |      |    |        |         |
| 137      | O    | 12.6959 | 7.2702 | 1.0431  | O.2  | 9  | SER261 | -0.3943 |
| BACKBONE |      |         |        |         |      |    |        |         |
| 138      | CB   | 13.6400 | 4.4030 | 0.4464  | C.3  | 9  | SER261 | 0.0843  |
| 139      | OG   | 13.8056 | 4.5202 | -0.9771 | O.3  | 9  | SER261 | -0.3903 |
| 140      | H    | 11.3228 | 3.3740 | -0.2196 | H    | 9  | SER261 | 0.1884  |
| 141      | HA   | 12.2157 | 4.9915 | 1.9615  | H    | 9  | SER261 | 0.0823  |
| 142      | HB3  | 13.7014 | 3.3465 | 0.7612  | H    | 9  | SER261 | 0.0606  |
| 143      | HB2  | 14.4398 | 4.9682 | 0.9563  | H    | 9  | SER261 | 0.0606  |
| 144      | HG   | 14.6209 | 4.1434 | -1.2935 | H    | 9  | SER261 | 0.2097  |
| 145      | N    | 11.4484 | 6.6931 | -0.7436 | N.am | 10 | MET262 | -0.2636 |
| BACKBONE |      |         |        |         |      |    |        |         |
| 146      | CA   | 11.2444 | 8.0856 | -1.1609 | C.3  | 10 | MET262 | 0.1317  |
| BACKBONE |      |         |        |         |      |    |        |         |
| 147      | C    | 9.8421  | 8.5718 | -0.8331 | C.2  | 10 | MET262 | 0.2039  |
| BACKBONE |      |         |        |         |      |    |        |         |
| 148      | O    | 9.3987  | 9.5760 | -1.3757 | O.2  | 10 | MET262 | -0.3944 |
| BACKBONE |      |         |        |         |      |    |        |         |
| 149      | CB   | 11.6235 | 8.2090 | -2.6633 | C.3  | 10 | MET262 | -0.0034 |
| 150      | CG   | 13.1467 | 8.0166 | -2.8780 | C.3  | 10 | MET262 | -0.0024 |
| 151      | SD   | 14.0413 | 9.4723 | -2.2409 | S.o  | 10 | MET262 | -0.1639 |
| 152      | CE   | 15.7526 | 8.9152 | -2.5054 | C.3  | 10 | MET262 | -0.0181 |
| 153      | H    | 10.9984 | 5.9674 | -1.2768 | H    | 10 | MET262 | 0.1883  |
| 154      | HA   | 11.8859 | 8.7850 | -0.6025 | H    | 10 | MET262 | 0.0800  |
| 155      | HB3  | 11.3344 | 9.1908 | -3.0655 | H    | 10 | MET262 | 0.0320  |
| 156      | HB2  | 11.0913 | 7.4342 | -3.2350 | H    | 10 | MET262 | 0.0320  |
| 157      | HG3  | 13.3747 | 7.9232 | -3.9505 | H    | 10 | MET262 | 0.0378  |

|          |      |         |         |         |       |    |        |         |
|----------|------|---------|---------|---------|-------|----|--------|---------|
| 158      | HG2  | 13.4933 | 7.1087  | -2.3600 | H     | 10 | MET262 | 0.0378  |
| 159      | LPD2 | 13.8996 | 10.0325 | -2.5974 | LP    | 10 | MET262 | 0.0000  |
| 160      | LPD1 | 13.9098 | 9.5827  | -1.5840 | LP    | 10 | MET262 | 0.0000  |
| 161      | HE3  | 15.9144 | 7.9436  | -2.0156 | H     | 10 | MET262 | 0.0340  |
| 162      | HE2  | 16.4423 | 9.6522  | -2.0701 | H     | 10 | MET262 | 0.0340  |
| 163      | HE1  | 15.9477 | 8.8204  | -3.5841 | H     | 10 | MET262 | 0.0340  |
| 164      | N    | 9.1099  | 7.8976  | 0.0840  | N.am  | 11 | ALA263 | -0.2640 |
| BACKBONE |      |         |         |         |       |    |        |         |
| 165      | CA   | 7.8212  | 8.4360  | 0.5116  | C.3   | 11 | ALA263 | 0.1282  |
| BACKBONE |      |         |         |         |       |    |        |         |
| 166      | C    | 8.0403  | 9.6884  | 1.3229  | C.2   | 11 | ALA263 | 0.2037  |
| BACKBONE |      |         |         |         |       |    |        |         |
| 167      | O    | 7.2912  | 10.6421 | 1.1616  | O.2   | 11 | ALA263 | -0.3944 |
| BACKBONE |      |         |         |         |       |    |        |         |
| 168      | CB   | 7.0064  | 7.4096  | 1.3400  | C.3   | 11 | ALA263 | -0.0244 |
| 169      | H    | 9.4487  | 7.0700  | 0.5427  | H     | 11 | ALA263 | 0.1883  |
| 170      | HA   | 7.2351  | 8.7343  | -0.3652 | H     | 11 | ALA263 | 0.0797  |
| 171      | HB3  | 7.5622  | 7.1204  | 2.2459  | H     | 11 | ALA263 | 0.0277  |
| 172      | HB2  | 6.8161  | 6.5107  | 0.7347  | H     | 11 | ALA263 | 0.0277  |
| 173      | HB1  | 6.0392  | 7.8419  | 1.6420  | H     | 11 | ALA263 | 0.0277  |
| 174      | N    | 9.0650  | 9.7165  | 2.1984  | N.am  | 12 | ASP264 | -0.2622 |
| BACKBONE |      |         |         |         |       |    |        |         |
| 175      | CA   | 9.2760  | 10.9171 | 2.9985  | C.3   | 12 | ASP264 | 0.1423  |
| BACKBONE |      |         |         |         |       |    |        |         |
| 176      | C    | 9.5822  | 12.1044 | 2.0992  | C.2   | 12 | ASP264 | 0.2057  |
| BACKBONE |      |         |         |         |       |    |        |         |
| 177      | O    | 10.4490 | 12.0250 | 1.2421  | O.2   | 12 | ASP264 | -0.3943 |
| BACKBONE |      |         |         |         |       |    |        |         |
| 178      | CB   | 10.3850 | 10.7184 | 4.0594  | C.3   | 12 | ASP264 | 0.0406  |
| 179      | CG   | 10.5895 | 11.9545 | 4.8866  | C.2   | 12 | ASP264 | 0.0393  |
| 180      | OD1  | 9.9215  | 12.9931 | 4.6222  | O.co2 | 12 | ASP264 | -0.5688 |
| 181      | OD2  | 11.4415 | 11.8926 | 5.8062  | O.co2 | 12 | ASP264 | -0.5688 |
| 182      | H    | 9.6885  | 8.9415  | 2.3079  | H     | 12 | ASP264 | 0.1884  |
| 183      | HA   | 8.3496  | 11.0892 | 3.5701  | H     | 12 | ASP264 | 0.0819  |
| 184      | HB3  | 11.3328 | 10.4713 | 3.5639  | H     | 12 | ASP264 | 0.0478  |
| 185      | HB2  | 10.1172 | 9.8850  | 4.7284  | H     | 12 | ASP264 | 0.0478  |
| 186      | N    | 8.8784  | 13.2423 | 2.2849  | N.am  | 13 | TYR265 | -0.2620 |
| BACKBONE |      |         |         |         |       |    |        |         |
| 187      | CA   | 9.2231  | 14.4608 | 1.5527  | C.3   | 13 | TYR265 | 0.1390  |
| BACKBONE |      |         |         |         |       |    |        |         |
| 188      | C    | 10.6561 | 14.8549 | 1.8260  | C.2   | 13 | TYR265 | 0.2057  |
| BACKBONE |      |         |         |         |       |    |        |         |
| 189      | O    | 11.3387 | 15.2861 | 0.9064  | O.2   | 13 | TYR265 | -0.3942 |
| BACKBONE |      |         |         |         |       |    |        |         |
| 190      | CB   | 8.2952  | 15.6175 | 2.0120  | C.3   | 13 | TYR265 | 0.0163  |
| 191      | CG   | 8.7890  | 16.9907 | 1.5300  | C.ar  | 13 | TYR265 | -0.0493 |
| 192      | CD1  | 8.5524  | 17.4153 | 0.2257  | C.ar  | 13 | TYR265 | -0.0685 |
| 193      | CD2  | 9.4810  | 17.8367 | 2.4139  | C.ar  | 13 | TYR265 | -0.0685 |
| 194      | CE1  | 8.8930  | 18.7254 | -0.1524 | C.ar  | 13 | TYR265 | -0.0398 |
| 195      | CE2  | 9.8077  | 19.1354 | 2.0428  | C.ar  | 13 | TYR265 | -0.0398 |
| 196      | CZ   | 9.4564  | 19.6026 | 0.7633  | C.ar  | 13 | TYR265 | 0.0805  |
| 197      | OH   | 9.6605  | 20.9428 | 0.4350  | O.3   | 13 | TYR265 | -0.3376 |

|          |     |         |         |         |       |    |        |         |
|----------|-----|---------|---------|---------|-------|----|--------|---------|
| 198      | H   | 8.2129  | 13.2906 | 3.0325  | H     | 13 | TYR265 | 0.1885  |
| 199      | HA  | 9.1105  | 14.2981 | 0.4691  | H     | 13 | TYR265 | 0.0821  |
| 200      | HB2 | 8.2513  | 15.6348 | 3.1133  | H     | 13 | TYR265 | 0.0453  |
| 201      | HB3 | 7.2728  | 15.4422 | 1.6405  | H     | 13 | TYR265 | 0.0453  |
| 202      | HD1 | 8.1036  | 16.7459 | -0.5005 | H     | 13 | TYR265 | 0.0530  |
| 203      | HD2 | 9.7637  | 17.4765 | 3.3993  | H     | 13 | TYR265 | 0.0530  |
| 204      | HE1 | 8.7053  | 19.0517 | -1.1675 | H     | 13 | TYR265 | 0.0525  |
| 205      | HE2 | 10.3323 | 19.7894 | 2.7334  | H     | 13 | TYR265 | 0.0525  |
| 206      | HH  | 10.2159 | 20.9975 | -0.3407 | H     | 13 | TYR265 | 0.2458  |
| 207      | N   | 11.1303 | 14.7152 | 3.0828  | N.am  | 14 | GLU266 | -0.2635 |
| BACKBONE |     |         |         |         |       |    |        |         |
| 208      | CA  | 12.4999 | 15.1308 | 3.3760  | C.3   | 14 | GLU266 | 0.1325  |
| BACKBONE |     |         |         |         |       |    |        |         |
| 209      | C   | 13.4703 | 14.2873 | 2.5654  | C.2   | 14 | GLU266 | 0.2040  |
| BACKBONE |     |         |         |         |       |    |        |         |
| 210      | O   | 14.4198 | 14.7943 | 1.9831  | O.2   | 14 | GLU266 | -0.3944 |
| BACKBONE |     |         |         |         |       |    |        |         |
| 211      | CB  | 12.8301 | 15.0740 | 4.8913  | C.3   | 14 | GLU266 | -0.0008 |
| 212      | CG  | 11.9924 | 16.1009 | 5.7065  | C.3   | 14 | GLU266 | 0.0044  |
| 213      | CD  | 12.2181 | 17.5195 | 5.2452  | C.2   | 14 | GLU266 | 0.0350  |
| 214      | OE1 | 13.3790 | 17.8526 | 4.8869  | O.co2 | 14 | GLU266 | -0.5690 |
| 215      | OE2 | 11.2392 | 18.3142 | 5.2272  | O.co2 | 14 | GLU266 | -0.5690 |
| 216      | H   | 10.5757 | 14.2927 | 3.8149  | H     | 14 | GLU266 | 0.1883  |
| 217      | HA  | 12.5926 | 16.1785 | 3.0705  | H     | 14 | GLU266 | 0.0801  |
| 218      | HB3 | 13.8998 | 15.3016 | 5.0321  | H     | 14 | GLU266 | 0.0330  |
| 219      | HB2 | 12.6468 | 14.0539 | 5.2623  | H     | 14 | GLU266 | 0.0330  |
| 220      | HG3 | 12.2748 | 16.0461 | 6.7692  | H     | 14 | GLU266 | 0.0433  |
| 221      | HG2 | 10.9210 | 15.8611 | 5.6295  | H     | 14 | GLU266 | 0.0433  |
| 222      | N   | 13.2416 | 12.9584 | 2.4899  | N.am  | 15 | ALA267 | -0.2640 |
| BACKBONE |     |         |         |         |       |    |        |         |
| 223      | CA  | 14.0943 | 12.1303 | 1.6363  | C.3   | 15 | ALA267 | 0.1282  |
| BACKBONE |     |         |         |         |       |    |        |         |
| 224      | C   | 14.0560 | 12.6401 | 0.2120  | C.2   | 15 | ALA267 | 0.2036  |
| BACKBONE |     |         |         |         |       |    |        |         |
| 225      | O   | 15.0730 | 12.6018 | -0.4637 | O.2   | 15 | ALA267 | -0.3944 |
| BACKBONE |     |         |         |         |       |    |        |         |
| 226      | CB  | 13.6530 | 10.6424 | 1.6231  | C.3   | 15 | ALA267 | -0.0244 |
| 227      | H   | 12.4689 | 12.5462 | 2.9768  | H     | 15 | ALA267 | 0.1883  |
| 228      | HA  | 15.1327 | 12.1959 | 2.0023  | H     | 15 | ALA267 | 0.0797  |
| 229      | HB3 | 12.6216 | 10.5530 | 1.2492  | H     | 15 | ALA267 | 0.0277  |
| 230      | HB2 | 13.7034 | 10.2252 | 2.6406  | H     | 15 | ALA267 | 0.0277  |
| 231      | HB1 | 14.3148 | 10.0517 | 0.9687  | H     | 15 | ALA267 | 0.0277  |
| 232      | N   | 12.8933 | 13.1209 | -0.2808 | N.am  | 16 | ARG268 | -0.2637 |
| BACKBONE |     |         |         |         |       |    |        |         |
| 233      | CA  | 12.8609 | 13.6281 | -1.6490 | C.3   | 16 | ARG268 | 0.1311  |
| BACKBONE |     |         |         |         |       |    |        |         |
| 234      | C   | 13.5304 | 14.9789 | -1.7553 | C.2   | 16 | ARG268 | 0.2039  |
| BACKBONE |     |         |         |         |       |    |        |         |
| 235      | O   | 14.2828 | 15.1605 | -2.6968 | O.2   | 16 | ARG268 | -0.3944 |
| BACKBONE |     |         |         |         |       |    |        |         |
| 236      | CB  | 11.4302 | 13.7345 | -2.2393 | C.3   | 16 | ARG268 | -0.0092 |
| 237      | CG  | 10.7238 | 12.3523 | -2.2429 | C.3   | 16 | ARG268 | -0.0156 |

|          |      |         |         |         |       |    |        |         |
|----------|------|---------|---------|---------|-------|----|--------|---------|
| 238      | CD   | 9.4531  | 12.3627 | -3.1347 | C.3   | 16 | ARG268 | 0.0627  |
| 239      | NE   | 8.4568  | 13.3025 | -2.6168 | N.pl3 | 16 | ARG268 | -0.2723 |
| 240      | CZ   | 7.6686  | 13.0364 | -1.6005 | C.cat | 16 | ARG268 | 0.2882  |
| 241      | NH1  | 7.7188  | 11.9143 | -0.9224 | N.pl3 | 16 | ARG268 | -0.2849 |
| 242      | NH2  | 6.7924  | 13.9477 | -1.2555 | N.pl3 | 16 | ARG268 | -0.2849 |
| 243      | H    | 12.0651 | 13.1688 | 0.2854  | H     | 16 | ARG268 | 0.1883  |
| 244      | HA   | 13.4245 | 12.9301 | -2.2937 | H     | 16 | ARG268 | 0.0800  |
| 245      | HB3  | 11.5237 | 14.1138 | -3.2700 | H     | 16 | ARG268 | 0.0313  |
| 246      | HB2  | 10.8323 | 14.4560 | -1.6606 | H     | 16 | ARG268 | 0.0313  |
| 247      | HG3  | 10.4725 | 12.0886 | -1.2097 | H     | 16 | ARG268 | 0.0301  |
| 248      | HG2  | 11.4081 | 11.5752 | -2.6069 | H     | 16 | ARG268 | 0.0301  |
| 249      | HD3  | 9.0410  | 11.3525 | -3.2602 | H     | 16 | ARG268 | 0.0689  |
| 250      | HD2  | 9.7492  | 12.6599 | -4.1500 | H     | 16 | ARG268 | 0.0689  |
| 251      | HE   | 8.3745  | 14.2210 | -3.1012 | H     | 16 | ARG268 | 0.2642  |
| 252      | HH11 | 8.3801  | 11.1515 | -1.1439 | H     | 16 | ARG268 | 0.2615  |
| 253      | HH12 | 7.1071  | 11.7498 | -0.1039 | H     | 16 | ARG268 | 0.2615  |
| 254      | HH21 | 6.7160  | 14.8446 | -1.7698 | H     | 16 | ARG268 | 0.2615  |
| 255      | HH22 | 6.1403  | 13.7915 | -0.4753 | H     | 16 | ARG268 | 0.2615  |
| 256      | N    | 13.3040 | 15.9662 | -0.8598 | N.am  | 17 | ILE269 | -0.2635 |
| BACKBONE |      |         |         |         |       |    |        |         |
| 257      | CA   | 14.0059 | 17.2431 | -1.0505 | C.3   | 17 | ILE269 | 0.1335  |
| BACKBONE |      |         |         |         |       |    |        |         |
| 258      | C    | 15.5052 | 17.0115 | -1.0358 | C.2   | 17 | ILE269 | 0.2043  |
| BACKBONE |      |         |         |         |       |    |        |         |
| 259      | O    | 16.2191 | 17.6115 | -1.8265 | O.2   | 17 | ILE269 | -0.3944 |
| BACKBONE |      |         |         |         |       |    |        |         |
| 260      | CB   | 13.5812 | 18.3825 | -0.0751 | C.3   | 17 | ILE269 | -0.0037 |
| 261      | CG1  | 14.0116 | 19.8014 | -0.5612 | C.3   | 17 | ILE269 | -0.0491 |
| 262      | CG2  | 14.1742 | 18.1750 | 1.3424  | C.3   | 17 | ILE269 | -0.0582 |
| 263      | CD1  | 13.3211 | 20.2590 | -1.8714 | C.3   | 17 | ILE269 | -0.0648 |
| 264      | H    | 12.6843 | 15.8285 | -0.0766 | H     | 17 | ILE269 | 0.1883  |
| 265      | HA   | 13.7333 | 17.5854 | -2.0536 | H     | 17 | ILE269 | 0.0803  |
| 266      | HB   | 12.4789 | 18.3560 | 0.0014  | H     | 17 | ILE269 | 0.0345  |
| 267      | HG13 | 15.1053 | 19.8531 | -0.6919 | H     | 17 | ILE269 | 0.0267  |
| 268      | HG12 | 13.7284 | 20.5229 | 0.2250  | H     | 17 | ILE269 | 0.0267  |
| 269      | HG23 | 13.9982 | 17.1509 | 1.6640  | H     | 17 | ILE269 | 0.0235  |
| 270      | HG22 | 13.6936 | 18.8485 | 2.0702  | H     | 17 | ILE269 | 0.0235  |
| 271      | HG21 | 15.2603 | 18.3528 | 1.3563  | H     | 17 | ILE269 | 0.0235  |
| 272      | HD13 | 13.7427 | 19.7793 | -2.7677 | H     | 17 | ILE269 | 0.0230  |
| 273      | HD12 | 13.4402 | 21.3467 | -1.9848 | H     | 17 | ILE269 | 0.0230  |
| 274      | HD11 | 12.2506 | 20.0275 | -1.8076 | H     | 17 | ILE269 | 0.0230  |
| 275      | N    | 16.0023 | 16.1238 | -0.1444 | N.am  | 18 | PHE270 | -0.2619 |
| BACKBONE |      |         |         |         |       |    |        |         |
| 276      | CA   | 17.4476 | 15.8886 | -0.0527 | C.3   | 18 | PHE270 | 0.1404  |
| BACKBONE |      |         |         |         |       |    |        |         |
| 277      | C    | 18.1023 | 15.6163 | -1.3929 | C.2   | 18 | PHE270 | 0.2060  |
| BACKBONE |      |         |         |         |       |    |        |         |
| 278      | O    | 19.1760 | 16.1297 | -1.6731 | O.2   | 18 | PHE270 | -0.3942 |
| BACKBONE |      |         |         |         |       |    |        |         |
| 279      | CB   | 17.6894 | 14.6597 | 0.8643  | C.3   | 18 | PHE270 | 0.0214  |
| 280      | CG   | 19.1773 | 14.3038 | 0.9605  | C.ar  | 18 | PHE270 | -0.0386 |
| 281      | CD1  | 20.0030 | 14.9815 | 1.8621  | C.ar  | 18 | PHE270 | -0.0601 |



|          |      |         |         |         |      |    |        |         |
|----------|------|---------|---------|---------|------|----|--------|---------|
| 282      | CD2  | 19.7171 | 13.2925 | 0.1561  | C.ar | 18 | PHE270 | -0.0601 |
| 283      | CE1  | 21.3420 | 14.6094 | 2.0082  | C.ar | 18 | PHE270 | -0.0686 |
| 284      | CE2  | 21.0537 | 12.9156 | 0.3050  | C.ar | 18 | PHE270 | -0.0686 |
| 285      | CZ   | 21.8651 | 13.5659 | 1.2382  | C.ar | 18 | PHE270 | -0.0687 |
| 286      | H    | 15.3862 | 15.6258 | 0.4807  | H    | 18 | PHE270 | 0.1885  |
| 287      | HA   | 17.9265 | 16.7776 | 0.3883  | H    | 18 | PHE270 | 0.0823  |
| 288      | HB3  | 17.1294 | 13.7969 | 0.4727  | H    | 18 | PHE270 | 0.0474  |
| 289      | HB2  | 17.3037 | 14.8697 | 1.8746  | H    | 18 | PHE270 | 0.0474  |
| 290      | HD1  | 19.6064 | 15.7990 | 2.4561  | H    | 18 | PHE270 | 0.0557  |
| 291      | HD2  | 19.0999 | 12.7946 | -0.5849 | H    | 18 | PHE270 | 0.0557  |
| 292      | HE1  | 21.9756 | 15.1283 | 2.7202  | H    | 18 | PHE270 | 0.0599  |
| 293      | HE2  | 21.4625 | 12.1149 | -0.3039 | H    | 18 | PHE270 | 0.0599  |
| 294      | HZ   | 22.8990 | 13.2626 | 1.3657  | H    | 18 | PHE270 | 0.0559  |
| 295      | N    | 17.4679 | 14.7965 | -2.2539 | N.am | 19 | THR271 | -0.2612 |
| BACKBONE |      |         |         |         |      |    |        |         |
| 296      | CA   | 18.0971 | 14.4387 | -3.5296 | C.3  | 19 | THR271 | 0.1565  |
| BACKBONE |      |         |         |         |      |    |        |         |
| 297      | C    | 18.2754 | 15.6599 | -4.4022 | C.2  | 19 | THR271 | 0.2066  |
| BACKBONE |      |         |         |         |      |    |        |         |
| 298      | O    | 19.1526 | 15.6542 | -5.2520 | O.2  | 19 | THR271 | -0.3943 |
| BACKBONE |      |         |         |         |      |    |        |         |
| 299      | CB   | 17.1742 | 13.4593 | -4.2952 | C.3  | 19 | THR271 | 0.0924  |
| 300      | OG1  | 15.9256 | 14.1724 | -4.3312 | O.3  | 19 | THR271 | -0.3874 |
| 301      | CG2  | 17.0797 | 12.0933 | -3.5621 | C.3  | 19 | THR271 | -0.0346 |
| 302      | H    | 16.5324 | 14.4840 | -2.0602 | H    | 19 | THR271 | 0.1884  |
| 303      | HA   | 19.0868 | 13.9883 | -3.3516 | H    | 19 | THR271 | 0.0826  |
| 304      | HB   | 17.5435 | 13.2740 | -5.3184 | H    | 19 | THR271 | 0.0639  |
| 305      | HG1  | 15.1510 | 13.6618 | -4.5038 | H    | 19 | THR271 | 0.2101  |
| 306      | HG22 | 16.3542 | 11.4475 | -4.0773 | H    | 19 | THR271 | 0.0257  |
| 307      | HG21 | 16.7598 | 12.2112 | -2.5166 | H    | 19 | THR271 | 0.0257  |
| 308      | HG23 | 18.0584 | 11.5865 | -3.5717 | H    | 19 | THR271 | 0.0257  |
| 309      | N    | 17.4698 | 16.7290 | -4.2137 | N.am | 20 | PHE272 | -0.2619 |
| BACKBONE |      |         |         |         |      |    |        |         |
| 310      | CA   | 17.6758 | 17.9429 | -4.9984 | C.3  | 20 | PHE272 | 0.1404  |
| BACKBONE |      |         |         |         |      |    |        |         |
| 311      | C    | 18.6770 | 18.8858 | -4.3515 | C.2  | 20 | PHE272 | 0.2058  |
| BACKBONE |      |         |         |         |      |    |        |         |
| 312      | O    | 18.7003 | 20.0518 | -4.7226 | O.2  | 20 | PHE272 | -0.3942 |
| BACKBONE |      |         |         |         |      |    |        |         |
| 313      | CB   | 16.3174 | 18.6647 | -5.1744 | C.3  | 20 | PHE272 | 0.0214  |
| 314      | CG   | 15.3050 | 17.8452 | -5.9867 | C.ar | 20 | PHE272 | -0.0386 |
| 315      | CD1  | 14.2616 | 17.1596 | -5.3637 | C.ar | 20 | PHE272 | -0.0601 |
| 316      | CD2  | 15.4029 | 17.7897 | -7.3817 | C.ar | 20 | PHE272 | -0.0601 |
| 317      | CE1  | 13.2883 | 16.5029 | -6.1183 | C.ar | 20 | PHE272 | -0.0686 |
| 318      | CE2  | 14.4692 | 17.0817 | -8.1404 | C.ar | 20 | PHE272 | -0.0686 |
| 319      | CZ   | 13.4130 | 16.4222 | -7.5108 | C.ar | 20 | PHE272 | -0.0687 |
| 320      | H    | 16.7634 | 16.7355 | -3.4982 | H    | 20 | PHE272 | 0.1885  |
| 321      | HA   | 18.0629 | 17.7053 | -6.0035 | H    | 20 | PHE272 | 0.0823  |
| 322      | HB3  | 16.4837 | 19.6033 | -5.7136 | H    | 20 | PHE272 | 0.0474  |
| 323      | HB2  | 15.9093 | 18.9153 | -4.1827 | H    | 20 | PHE272 | 0.0474  |
| 324      | HD1  | 14.2016 | 17.1382 | -4.2850 | H    | 20 | PHE272 | 0.0557  |
| 325      | HD2  | 16.2135 | 18.3016 | -7.8739 | H    | 20 | PHE272 | 0.0557  |

|          |         |         |                |           |         |
|----------|---------|---------|----------------|-----------|---------|
| 326 HE1  | 12.4354 | 16.0590 | -5.6208 H      | 20 PHE272 | 0.0599  |
| 327 HE2  | 14.5707 | 17.0438 | -9.2212 H      | 20 PHE272 | 0.0599  |
| 328 HZ   | 12.6969 | 15.8513 | -8.0924 H      | 20 PHE272 | 0.0559  |
| 329 N    | 19.5189 | 18.4404 | -3.3881 N.am   | 21 GLY273 | -0.2663 |
| BACKBONE |         |         |                |           |         |
| 330 CA   | 20.4671 | 19.3644 | -2.7657 C.3    | 21 GLY273 | 0.1201  |
| BACKBONE |         |         |                |           |         |
| 331 C    | 21.1563 | 20.2687 | -3.7652 C.2    | 21 GLY273 | 0.2008  |
| BACKBONE |         |         |                |           |         |
| 332 O    | 21.1514 | 21.4763 | -3.5758 O.2    | 21 GLY273 | -0.3947 |
| BACKBONE |         |         |                |           |         |
| 333 H    | 19.4817 | 17.4989 | -3.0318 H      | 21 GLY273 | 0.1881  |
| 334 HA2  | 21.2605 | 18.8120 | -2.2354 H      | 21 GLY273 | 0.0763  |
| 335 HA3  | 19.9267 | 19.9763 | -2.0275 H      | 21 GLY273 | 0.0763  |
| 336 N    | 21.7523 | 19.6873 | -4.8316 N.am   | 22 THR274 | -0.2616 |
| BACKBONE |         |         |                |           |         |
| 337 CA   | 22.5054 | 20.4725 | -5.8146 C.3    | 22 THR274 | 0.1565  |
| BACKBONE |         |         |                |           |         |
| 338 C    | 21.7329 | 20.5886 | -7.1148 C.2    | 22 THR274 | 0.2066  |
| BACKBONE |         |         |                |           |         |
| 339 O    | 22.3167 | 20.5002 | -8.1827 O.2    | 22 THR274 | -0.3943 |
| BACKBONE |         |         |                |           |         |
| 340 CB   | 23.8594 | 19.7408 | -6.0368 C.3    | 22 THR274 | 0.0924  |
| 341 OG1  | 23.5422 | 18.3789 | -6.3862 O.3    | 22 THR274 | -0.3874 |
| 342 CG2  | 24.7166 | 19.7537 | -4.7432 C.3    | 22 THR274 | -0.0346 |
| 343 H    | 21.6980 | 18.6953 | -4.9833 H      | 22 THR274 | 0.1884  |
| 344 HA   | 22.7085 | 21.5001 | -5.4734 H      | 22 THR274 | 0.0826  |
| 345 HB   | 24.4283 | 20.2353 | -6.8463 H      | 22 THR274 | 0.0639  |
| 346 HG1  | 24.3130 | 17.8595 | -6.5929 H      | 22 THR274 | 0.2101  |
| 347 HG22 | 25.6584 | 19.2070 | -4.9113 H      | 22 THR274 | 0.0257  |
| 348 HG21 | 24.1725 | 19.2664 | -3.9184 H      | 22 THR274 | 0.0257  |
| 349 HG23 | 24.9586 | 20.7878 | -4.4503 H      | 22 THR274 | 0.0257  |
| 350 N    | 20.3998 | 20.7916 | -7.0736 N.am   | 23 TRP275 | -0.2626 |
| BACKBONE |         |         |                |           |         |
| 351 CA   | 19.6464 | 20.8773 | -8.3319 C.3    | 23 TRP275 | 0.1352  |
| BACKBONE |         |         |                |           |         |
| 352 C    | 19.9850 | 22.1435 | -9.0932 C.2    | 23 TRP275 | 0.2052  |
| BACKBONE |         |         |                |           |         |
| 353 O    | 19.8958 | 23.2043 | -8.4958 O.2    | 23 TRP275 | -0.3942 |
| BACKBONE |         |         |                |           |         |
| 354 CB   | 18.1353 | 20.8626 | -8.0039 C.3    | 23 TRP275 | 0.0042  |
| 355 CG   | 17.1565 | 20.7877 | -9.1462 C.2    | 23 TRP275 | -0.0418 |
| 356 CD1  | 16.2953 | 21.7447 | -9.5433 C.2    | 23 TRP275 | 0.0167  |
| 357 CD2  | 16.9154 | 19.5955 | -10.0276 C.ar  | 23 TRP275 | -0.0214 |
| 358 NE1  | 15.5470 | 21.2869 | -10.5045 N.pl3 | 23 TRP275 | -0.2890 |
| 359 CE2  | 15.8575 | 20.0078 | -10.8145 C.ar  | 23 TRP275 | 0.0603  |
| 360 CE3  | 17.4877 | 18.3222 | -10.1552 C.ar  | 23 TRP275 | -0.0747 |
| 361 CZ2  | 15.2704 | 19.1573 | -11.7490 C.ar  | 23 TRP275 | -0.0443 |
| 362 CZ3  | 16.9001 | 17.4598 | -11.0866 C.ar  | 23 TRP275 | -0.0792 |
| 363 CH2  | 15.7998 | 17.8644 | -11.8563 C.ar  | 23 TRP275 | -0.0768 |
| 364 H    | 19.9260 | 20.8794 | -6.1905 H      | 23 TRP275 | 0.1884  |
| 365 HA   | 19.8776 | 19.9868 | -8.9397 H      | 23 TRP275 | 0.0815  |

|          |      |         |         |          |      |    |        |         |
|----------|------|---------|---------|----------|------|----|--------|---------|
| 366      | HB3  | 17.9013 | 21.7430 | -7.3872  | H    | 23 | TRP275 | 0.0397  |
| 367      | HB2  | 17.9693 | 19.9619 | -7.4025  | H    | 23 | TRP275 | 0.0397  |
| 368      | HD1  | 16.2218 | 22.7465 | -9.1137  | H    | 23 | TRP275 | 0.0795  |
| 369      | HE1  | 14.7860 | 21.8344 | -10.9557 | H    | 23 | TRP275 | 0.2216  |
| 370      | HE3  | 18.3389 | 18.0236 | -9.5557  | H    | 23 | TRP275 | 0.0540  |
| 371      | HZ2  | 14.4411 | 19.4839 | -12.3670 | H    | 23 | TRP275 | 0.0541  |
| 372      | HZ3  | 17.3048 | 16.4592 | -11.2163 | H    | 23 | TRP275 | 0.0510  |
| 373      | HH2  | 15.3485 | 17.1639 | -12.5516 | H    | 23 | TRP275 | 0.0530  |
| 374      | N    | 20.3615 | 22.0642 | -10.3940 | N.am | 24 | ILE276 | -0.2634 |
| BACKBONE |      |         |         |          |      |    |        |         |
| 375      | CA   | 20.6856 | 23.2697 | -11.1688 | C.3  | 24 | ILE276 | 0.1335  |
| BACKBONE |      |         |         |          |      |    |        |         |
| 376      | C    | 19.6765 | 23.5474 | -12.2640 | C.2  | 24 | ILE276 | 0.2043  |
| BACKBONE |      |         |         |          |      |    |        |         |
| 377      | O    | 19.9371 | 24.4323 | -13.0636 | O.2  | 24 | ILE276 | -0.3944 |
| BACKBONE |      |         |         |          |      |    |        |         |
| 378      | CB   | 22.1139 | 23.1698 | -11.7999 | C.3  | 24 | ILE276 | -0.0037 |
| 379      | CG1  | 22.2014 | 22.0627 | -12.9010 | C.3  | 24 | ILE276 | -0.0491 |
| 380      | CG2  | 23.1732 | 22.9673 | -10.6817 | C.3  | 24 | ILE276 | -0.0582 |
| 381      | CD1  | 23.5350 | 22.0764 | -13.6955 | C.3  | 24 | ILE276 | -0.0648 |
| 382      | H    | 20.4160 | 21.1810 | -10.8590 | H    | 24 | ILE276 | 0.1883  |
| 383      | HA   | 20.6619 | 24.1731 | -10.5366 | H    | 24 | ILE276 | 0.0803  |
| 384      | HB   | 22.3385 | 24.1359 | -12.2877 | H    | 24 | ILE276 | 0.0345  |
| 385      | HG13 | 21.3912 | 22.2080 | -13.6343 | H    | 24 | ILE276 | 0.0267  |
| 386      | HG12 | 22.0849 | 21.0599 | -12.4622 | H    | 24 | ILE276 | 0.0267  |
| 387      | HG23 | 23.0402 | 23.7145 | -9.8834  | H    | 24 | ILE276 | 0.0235  |
| 388      | HG22 | 24.1923 | 23.0838 | -11.0792 | H    | 24 | ILE276 | 0.0235  |
| 389      | HG21 | 23.0779 | 21.9643 | -10.2408 | H    | 24 | ILE276 | 0.0235  |
| 390      | HD13 | 23.7306 | 23.0775 | -14.1108 | H    | 24 | ILE276 | 0.0230  |
| 391      | HD12 | 23.4803 | 21.3596 | -14.5315 | H    | 24 | ILE276 | 0.0230  |
| 392      | HD11 | 24.3797 | 21.7820 | -13.0555 | H    | 24 | ILE276 | 0.0230  |
| 393      | N    | 18.5371 | 22.8272 | -12.3682 | N.am | 25 | TYR277 | -0.2621 |
| BACKBONE |      |         |         |          |      |    |        |         |
| 394      | CA   | 17.6574 | 23.0260 | -13.5225 | C.3  | 25 | TYR277 | 0.1390  |
| BACKBONE |      |         |         |          |      |    |        |         |
| 395      | C    | 16.5817 | 24.0451 | -13.2224 | C.2  | 25 | TYR277 | 0.2058  |
| BACKBONE |      |         |         |          |      |    |        |         |
| 396      | O    | 16.3385 | 24.3486 | -12.0668 | O.2  | 25 | TYR277 | -0.3942 |
| BACKBONE |      |         |         |          |      |    |        |         |
| 397      | CB   | 17.0631 | 21.6750 | -13.9934 | C.3  | 25 | TYR277 | 0.0163  |
| 398      | CG   | 18.2297 | 20.7301 | -14.3155 | C.ar | 25 | TYR277 | -0.0493 |
| 399      | CD1  | 18.6254 | 19.7487 | -13.4056 | C.ar | 25 | TYR277 | -0.0685 |
| 400      | CD2  | 18.9206 | 20.8529 | -15.5278 | C.ar | 25 | TYR277 | -0.0685 |
| 401      | CE1  | 19.7179 | 18.9180 | -13.6806 | C.ar | 25 | TYR277 | -0.0398 |
| 402      | CE2  | 20.0114 | 20.0275 | -15.8033 | C.ar | 25 | TYR277 | -0.0398 |
| 403      | CZ   | 20.4198 | 19.0562 | -14.8798 | C.ar | 25 | TYR277 | 0.0805  |
| 404      | OH   | 21.5218 | 18.2495 | -15.1778 | O.3  | 25 | TYR277 | -0.3376 |
| 405      | H    | 18.2559 | 22.1736 | -11.6658 | H    | 25 | TYR277 | 0.1885  |
| 406      | HA   | 18.2363 | 23.4147 | -14.3767 | H    | 25 | TYR277 | 0.0821  |
| 407      | HB2  | 16.4380 | 21.8007 | -14.8914 | H    | 25 | TYR277 | 0.0453  |
| 408      | HB3  | 16.4234 | 21.2650 | -13.1998 | H    | 25 | TYR277 | 0.0453  |
| 409      | HD1  | 18.0917 | 19.6241 | -12.4750 | H    | 25 | TYR277 | 0.0530  |

|          |      |         |         |          |      |    |        |         |
|----------|------|---------|---------|----------|------|----|--------|---------|
| 410      | HD2  | 18.6117 | 21.5938 | -16.2589 | H    | 25 | TYR277 | 0.0530  |
| 411      | HE1  | 20.0092 | 18.1705 | -12.9494 | H    | 25 | TYR277 | 0.0525  |
| 412      | HE2  | 20.5518 | 20.1328 | -16.7376 | H    | 25 | TYR277 | 0.0525  |
| 413      | HH   | 21.6300 | 17.5240 | -14.5707 | H    | 25 | TYR277 | 0.2458  |
| 414      | N    | 15.9245 | 24.6039 | -14.2621 | N.am | 26 | SER278 | -0.2614 |
| BACKBONE |      |         |         |          |      |    |        |         |
| 415      | CA   | 14.9744 | 25.6944 | -14.0252 | C.3  | 26 | SER278 | 0.1539  |
| BACKBONE |      |         |         |          |      |    |        |         |
| 416      | C    | 13.7945 | 25.2901 | -13.1706 | C.2  | 26 | SER278 | 0.2062  |
| BACKBONE |      |         |         |          |      |    |        |         |
| 417      | O    | 13.2854 | 26.1230 | -12.4371 | O.2  | 26 | SER278 | -0.3943 |
| BACKBONE |      |         |         |          |      |    |        |         |
| 418      | CB   | 14.4171 | 26.2283 | -15.3722 | C.3  | 26 | SER278 | 0.0843  |
| 419      | OG   | 13.5799 | 27.3773 | -15.1476 | O.3  | 26 | SER278 | -0.3903 |
| 420      | H    | 16.1149 | 24.3161 | -15.2025 | H    | 26 | SER278 | 0.1884  |
| 421      | HA   | 15.4938 | 26.5258 | -13.5195 | H    | 26 | SER278 | 0.0823  |
| 422      | HB3  | 13.8431 | 25.4262 | -15.8684 | H    | 26 | SER278 | 0.0606  |
| 423      | HB2  | 15.2630 | 26.5169 | -16.0201 | H    | 26 | SER278 | 0.0606  |
| 424      | HG   | 13.2271 | 27.7480 | -15.9506 | H    | 26 | SER278 | 0.2097  |
| 425      | N    | 13.3013 | 24.0348 | -13.2424 | N.am | 27 | VAL279 | -0.2634 |
| BACKBONE |      |         |         |          |      |    |        |         |
| 426      | CA   | 12.0721 | 23.7245 | -12.5132 | C.3  | 27 | VAL279 | 0.1333  |
| BACKBONE |      |         |         |          |      |    |        |         |
| 427      | C    | 12.3108 | 23.7198 | -11.0157 | C.2  | 27 | VAL279 | 0.2043  |
| BACKBONE |      |         |         |          |      |    |        |         |
| 428      | O    | 13.3414 | 23.2403 | -10.5653 | O.2  | 27 | VAL279 | -0.3944 |
| BACKBONE |      |         |         |          |      |    |        |         |
| 429      | CB   | 11.3981 | 22.4101 | -12.9924 | C.3  | 27 | VAL279 | -0.0063 |
| 430      | CG1  | 10.1554 | 22.0544 | -12.1375 | C.3  | 27 | VAL279 | -0.0584 |
| 431      | CG2  | 10.9446 | 22.5462 | -14.4699 | C.3  | 27 | VAL279 | -0.0584 |
| 432      | H    | 13.7539 | 23.3227 | -13.7787 | H    | 27 | VAL279 | 0.1883  |
| 433      | HA   | 11.3605 | 24.5364 | -12.7379 | H    | 27 | VAL279 | 0.0802  |
| 434      | HB   | 12.1290 | 21.5868 | -12.9049 | H    | 27 | VAL279 | 0.0343  |
| 435      | HG13 | 10.4094 | 21.9668 | -11.0730 | H    | 27 | VAL279 | 0.0234  |
| 436      | HG12 | 9.7543  | 21.0892 | -12.4807 | H    | 27 | VAL279 | 0.0234  |
| 437      | HG11 | 9.3806  | 22.8267 | -12.2550 | H    | 27 | VAL279 | 0.0234  |
| 438      | HG23 | 10.2877 | 23.4171 | -14.6179 | H    | 27 | VAL279 | 0.0234  |
| 439      | HG22 | 10.3729 | 21.6528 | -14.7516 | H    | 27 | VAL279 | 0.0234  |
| 440      | HG21 | 11.8195 | 22.6473 | -15.1282 | H    | 27 | VAL279 | 0.0234  |
| 441      | N    | 11.3537 | 24.2647 | -10.2252 | N.am | 28 | ASN280 | -0.2616 |
| BACKBONE |      |         |         |          |      |    |        |         |
| 442      | CA   | 11.5991 | 24.4481 | -8.7974  | C.3  | 28 | ASN280 | 0.1476  |
| BACKBONE |      |         |         |          |      |    |        |         |
| 443      | C    | 11.7031 | 23.1301 | -8.0459  | C.2  | 28 | ASN280 | 0.2063  |
| BACKBONE |      |         |         |          |      |    |        |         |
| 444      | O    | 10.8028 | 22.3060 | -8.1214  | O.2  | 28 | ASN280 | -0.3942 |
| BACKBONE |      |         |         |          |      |    |        |         |
| 445      | CB   | 10.5015 | 25.3250 | -8.1413  | C.3  | 28 | ASN280 | 0.0773  |
| 446      | CG   | 10.7432 | 25.3936 | -6.6561  | C.2  | 28 | ASN280 | 0.1780  |
| 447      | OD1  | 10.0720 | 24.6709 | -5.9398  | O.2  | 28 | ASN280 | -0.3970 |
| 448      | ND2  | 11.6872 | 26.2034 | -6.1410  | N.am | 28 | ASN280 | -0.3007 |
| 449      | H    | 10.4807 | 24.5839 | -10.5992 | H    | 28 | ASN280 | 0.1885  |

|          |      |         |         |         |       |    |        |         |
|----------|------|---------|---------|---------|-------|----|--------|---------|
| 450      | HA   | 12.5415 | 25.0136 | -8.7116 | H     | 28 | ASN280 | 0.0826  |
| 451      | HB3  | 9.5223  | 24.8631 | -8.3259 | H     | 28 | ASN280 | 0.0551  |
| 452      | HB2  | 10.4861 | 26.3341 | -8.5810 | H     | 28 | ASN280 | 0.0551  |
| 453      | HD21 | 12.2176 | 26.8316 | -6.7088 | H     | 28 | ASN280 | 0.1814  |
| 454      | HD22 | 11.8741 | 26.1392 | -5.1519 | H     | 28 | ASN280 | 0.1814  |
| 455      | N    | 12.8060 | 22.9153 | -7.2919 | N.am  | 29 | LYS281 | -0.2636 |
| BACKBONE |      |         |         |         |       |    |        |         |
| 456      | CA   | 12.9620 | 21.6640 | -6.5536 | C.3   | 29 | LYS281 | 0.1310  |
| BACKBONE |      |         |         |         |       |    |        |         |
| 457      | C    | 11.9156 | 21.4486 | -5.4837 | C.2   | 29 | LYS281 | 0.2039  |
| BACKBONE |      |         |         |         |       |    |        |         |
| 458      | O    | 11.4484 | 20.3289 | -5.3220 | O.2   | 29 | LYS281 | -0.3944 |
| BACKBONE |      |         |         |         |       |    |        |         |
| 459      | CB   | 14.3793 | 21.5096 | -5.9399 | C.3   | 29 | LYS281 | -0.0122 |
| 460      | CG   | 14.7660 | 22.5552 | -4.8557 | C.3   | 29 | LYS281 | -0.0440 |
| 461      | CD   | 16.2420 | 22.3739 | -4.4070 | C.3   | 29 | LYS281 | -0.0124 |
| 462      | CE   | 16.6543 | 23.3560 | -3.2783 | C.3   | 29 | LYS281 | -0.0354 |
| 463      | NZ   | 18.0989 | 23.2088 | -2.9670 | N.4   | 29 | LYS281 | 0.2185  |
| 464      | H    | 13.5392 | 23.5917 | -7.2422 | H     | 29 | LYS281 | 0.1883  |
| 465      | HA   | 12.8458 | 20.8447 | -7.2751 | H     | 29 | LYS281 | 0.0800  |
| 466      | HB3  | 15.1171 | 21.5319 | -6.7590 | H     | 29 | LYS281 | 0.0312  |
| 467      | HB2  | 14.3908 | 20.5173 | -5.4673 | H     | 29 | LYS281 | 0.0312  |
| 468      | HG3  | 14.1098 | 22.4181 | -3.9877 | H     | 29 | LYS281 | 0.0269  |
| 469      | HG2  | 14.6377 | 23.5843 | -5.2218 | H     | 29 | LYS281 | 0.0269  |
| 470      | HD3  | 16.9008 | 22.5319 | -5.2747 | H     | 29 | LYS281 | 0.0317  |
| 471      | HD2  | 16.3906 | 21.3507 | -4.0328 | H     | 29 | LYS281 | 0.0317  |
| 472      | HE3  | 16.0448 | 23.1408 | -2.3823 | H     | 29 | LYS281 | 0.0813  |
| 473      | HE2  | 16.4277 | 24.3910 | -3.5914 | H     | 29 | LYS281 | 0.0813  |
| 474      | HZ3  | 18.3626 | 22.1988 | -2.6802 | H     | 29 | LYS281 | 0.1994  |
| 475      | HZ2  | 18.4015 | 23.8597 | -2.1567 | H     | 29 | LYS281 | 0.1994  |
| 476      | HZ1  | 18.7405 | 23.4427 | -3.8071 | H     | 29 | LYS281 | 0.1994  |
| 477      | N    | 11.5307 | 22.4938 | -4.7242 | N.am  | 30 | GLU282 | -0.2636 |
| BACKBONE |      |         |         |         |       |    |        |         |
| 478      | CA   | 10.5355 | 22.2805 | -3.6789 | C.3   | 30 | GLU282 | 0.1325  |
| BACKBONE |      |         |         |         |       |    |        |         |
| 479      | C    | 9.2690  | 21.7723 | -4.3362 | C.2   | 30 | GLU282 | 0.2040  |
| BACKBONE |      |         |         |         |       |    |        |         |
| 480      | O    | 8.6985  | 20.7873 | -3.8922 | O.2   | 30 | GLU282 | -0.3944 |
| BACKBONE |      |         |         |         |       |    |        |         |
| 481      | CB   | 10.2633 | 23.5437 | -2.8118 | C.3   | 30 | GLU282 | -0.0008 |
| 482      | CG   | 11.4837 | 23.9573 | -1.9386 | C.3   | 30 | GLU282 | 0.0044  |
| 483      | CD   | 12.7089 | 24.3345 | -2.7305 | C.2   | 30 | GLU282 | 0.0350  |
| 484      | OE1  | 12.5604 | 24.7171 | -3.9279 | O.co2 | 30 | GLU282 | -0.5690 |
| 485      | OE2  | 13.8330 | 24.2362 | -2.1691 | O.co2 | 30 | GLU282 | -0.5690 |
| 486      | H    | 11.8976 | 23.4237 | -4.8628 | H     | 30 | GLU282 | 0.1883  |
| 487      | HA   | 10.8895 | 21.4861 | -3.0105 | H     | 30 | GLU282 | 0.0801  |
| 488      | HB3  | 9.4160  | 23.3260 | -2.1393 | H     | 30 | GLU282 | 0.0330  |
| 489      | HB2  | 9.9744  | 24.3887 | -3.4555 | H     | 30 | GLU282 | 0.0330  |
| 490      | HG3  | 11.7380 | 23.1342 | -1.2524 | H     | 30 | GLU282 | 0.0433  |
| 491      | HG2  | 11.2162 | 24.8344 | -1.3288 | H     | 30 | GLU282 | 0.0433  |
| 492      | N    | 8.8162  | 22.4246 | -5.4252 | N.am  | 31 | GLN283 | -0.2636 |
| BACKBONE |      |         |         |         |       |    |        |         |

|          |         |         |          |      |    |        |         |
|----------|---------|---------|----------|------|----|--------|---------|
| 493 CA   | 7.6143  | 21.9586 | -6.1114  | C.3  | 31 | GLN283 | 0.1330  |
| BACKBONE |         |         |          |      |    |        |         |
| 494 C    | 7.8146  | 20.5252 | -6.5686  | C.2  | 31 | GLN283 | 0.2040  |
| BACKBONE |         |         |          |      |    |        |         |
| 495 O    | 6.9251  | 19.7098 | -6.3735  | O.2  | 31 | GLN283 | -0.3944 |
| BACKBONE |         |         |          |      |    |        |         |
| 496 CB   | 7.2579  | 22.8636 | -7.3233  | C.3  | 31 | GLN283 | 0.0045  |
| 497 CG   | 6.8444  | 24.3070 | -6.9124  | C.3  | 31 | GLN283 | 0.0412  |
| 498 CD   | 6.6840  | 25.2147 | -8.1087  | C.2  | 31 | GLN283 | 0.1737  |
| 499 OE1  | 7.0652  | 24.8420 | -9.2076  | O.2  | 31 | GLN283 | -0.3973 |
| 500 NE2  | 6.1331  | 26.4315 | -7.9423  | N.am | 31 | GLN283 | -0.3009 |
| 501 H    | 9.3327  | 23.2031 | -5.7902  | H    | 31 | GLN283 | 0.1883  |
| 502 HA   | 6.7717  | 21.9833 | -5.4028  | H    | 31 | GLN283 | 0.0801  |
| 503 HB3  | 6.4137  | 22.4124 | -7.8703  | H    | 31 | GLN283 | 0.0337  |
| 504 HB2  | 8.1299  | 22.8971 | -7.9944  | H    | 31 | GLN283 | 0.0337  |
| 505 HG3  | 7.5986  | 24.7703 | -6.2619  | H    | 31 | GLN283 | 0.0504  |
| 506 HG2  | 5.8933  | 24.2740 | -6.3588  | H    | 31 | GLN283 | 0.0504  |
| 507 HE21 | 5.8268  | 26.7549 | -7.0476  | H    | 31 | GLN283 | 0.1814  |
| 508 HE22 | 6.0248  | 27.0195 | -8.7446  | H    | 31 | GLN283 | 0.1814  |
| 509 N    | 8.9726  | 20.1772 | -7.1752  | N.am | 32 | LEU284 | -0.2637 |
| BACKBONE |         |         |          |      |    |        |         |
| 510 CA   | 9.1799  | 18.7837 | -7.5865  | C.3  | 32 | LEU284 | 0.1312  |
| BACKBONE |         |         |          |      |    |        |         |
| 511 C    | 9.0355  | 17.8388 | -6.4067  | C.2  | 32 | LEU284 | 0.2039  |
| BACKBONE |         |         |          |      |    |        |         |
| 512 O    | 8.3153  | 16.8531 | -6.4970  | O.2  | 32 | LEU284 | -0.3944 |
| BACKBONE |         |         |          |      |    |        |         |
| 513 CB   | 10.5730 | 18.5642 | -8.2497  | C.3  | 32 | LEU284 | -0.0101 |
| 514 CG   | 10.6694 | 19.1362 | -9.6958  | C.3  | 32 | LEU284 | -0.0425 |
| 515 CD1  | 12.1473 | 19.3656 | -10.1189 | C.3  | 32 | LEU284 | -0.0625 |
| 516 CD2  | 10.0051 | 18.1939 | -10.7387 | C.3  | 32 | LEU284 | -0.0625 |
| 517 H    | 9.6962  | 20.8607 | -7.3345  | H    | 32 | LEU284 | 0.1883  |
| 518 HA   | 8.3899  | 18.5196 | -8.3007  | H    | 32 | LEU284 | 0.0800  |
| 519 HB3  | 10.8095 | 17.4931 | -8.2906  | H    | 32 | LEU284 | 0.0315  |
| 520 HB2  | 11.3294 | 19.0294 | -7.6043  | H    | 32 | LEU284 | 0.0315  |
| 521 HG   | 10.1520 | 20.1060 | -9.7105  | H    | 32 | LEU284 | 0.0298  |
| 522 HD13 | 12.6392 | 20.1142 | -9.4845  | H    | 32 | LEU284 | 0.0232  |
| 523 HD12 | 12.1872 | 19.7325 | -11.1541 | H    | 32 | LEU284 | 0.0232  |
| 524 HD11 | 12.7169 | 18.4284 | -10.0595 | H    | 32 | LEU284 | 0.0232  |
| 525 HD23 | 10.5142 | 17.2219 | -10.7279 | H    | 32 | LEU284 | 0.0232  |
| 526 HD22 | 10.0857 | 18.6164 | -11.7521 | H    | 32 | LEU284 | 0.0232  |
| 527 HD21 | 8.9436  | 18.0240 | -10.5320 | H    | 32 | LEU284 | 0.0232  |
| 528 N    | 9.7184  | 18.1106 | -5.2748  | N.am | 33 | ALA285 | -0.2640 |
| BACKBONE |         |         |          |      |    |        |         |
| 529 CA   | 9.5975  | 17.2027 | -4.1296  | C.3  | 33 | ALA285 | 0.1282  |
| BACKBONE |         |         |          |      |    |        |         |
| 530 C    | 8.1826  | 17.1816 | -3.5766  | C.2  | 33 | ALA285 | 0.2036  |
| BACKBONE |         |         |          |      |    |        |         |
| 531 O    | 7.6936  | 16.1181 | -3.2061  | O.2  | 33 | ALA285 | -0.3944 |
| BACKBONE |         |         |          |      |    |        |         |
| 532 CB   | 10.6135 | 17.5983 | -3.0292  | C.3  | 33 | ALA285 | -0.0244 |
| 533 H    | 10.2949 | 18.9375 | -5.2087  | H    | 33 | ALA285 | 0.1883  |

|          |         |         |              |           |         |
|----------|---------|---------|--------------|-----------|---------|
| 534 HA   | 9.8390  | 16.1807 | -4.4581 H    | 33 ALA285 | 0.0797  |
| 535 HB3  | 10.4492 | 18.6441 | -2.7376 H    | 33 ALA285 | 0.0277  |
| 536 HB2  | 11.6375 | 17.5027 | -3.4203 H    | 33 ALA285 | 0.0277  |
| 537 HB1  | 10.5097 | 16.9552 | -2.1417 H    | 33 ALA285 | 0.0277  |
| 538 N    | 7.5084  | 18.3567 | -3.5216 N.am | 34 ARG286 | -0.2637 |
| BACKBONE |         |         |              |           |         |
| 539 CA   | 6.1101  | 18.3799 | -3.0854 C.3  | 34 ARG286 | 0.1311  |
| BACKBONE |         |         |              |           |         |
| 540 C    | 5.2550  | 17.6224 | -4.0781 C.2  | 34 ARG286 | 0.2039  |
| BACKBONE |         |         |              |           |         |
| 541 O    | 4.3194  | 16.9656 | -3.6506 O.2  | 34 ARG286 | -0.3944 |
| BACKBONE |         |         |              |           |         |
| 542 CB   | 5.5090  | 19.8084 | -2.9241 C.3  | 34 ARG286 | -0.0092 |
| 543 CG   | 6.1830  | 20.7046 | -1.8420 C.3  | 34 ARG286 | -0.0156 |
| 544 CD   | 5.9456  | 20.2615 | -0.3678 C.3  | 34 ARG286 | 0.0627  |
| 545 NE   | 6.8132  | 21.0025 | 0.5602 N.pl3 | 34 ARG286 | -0.2723 |
| 546 CZ   | 6.8964  | 20.7592 | 1.8497 C.cat | 34 ARG286 | 0.2882  |
| 547 NH1  | 6.1623  | 19.8552 | 2.4469 N.pl3 | 34 ARG286 | -0.2849 |
| 548 NH2  | 7.7523  | 21.4429 | 2.5687 N.pl3 | 34 ARG286 | -0.2849 |
| 549 H    | 7.9348  | 19.2132 | -3.8402 H    | 34 ARG286 | 0.1883  |
| 550 HA   | 6.0282  | 17.8332 | -2.1344 H    | 34 ARG286 | 0.0800  |
| 551 HB3  | 4.4362  | 19.7309 | -2.6821 H    | 34 ARG286 | 0.0313  |
| 552 HB2  | 5.5976  | 20.3082 | -3.9026 H    | 34 ARG286 | 0.0313  |
| 553 HG3  | 5.8036  | 21.7353 | -1.9515 H    | 34 ARG286 | 0.0301  |
| 554 HG2  | 7.2616  | 20.7371 | -2.0263 H    | 34 ARG286 | 0.0301  |
| 555 HD3  | 6.1845  | 19.1923 | -0.2818 H    | 34 ARG286 | 0.0689  |
| 556 HD2  | 4.8796  | 20.4146 | -0.1256 H    | 34 ARG286 | 0.0689  |
| 557 HE   | 7.4233  | 21.7326 | 0.1558 H     | 34 ARG286 | 0.2642  |
| 558 HH11 | 5.4719  | 19.2964 | 1.9342 H     | 34 ARG286 | 0.2615  |
| 559 HH12 | 6.2574  | 19.6741 | 3.4565 H     | 34 ARG286 | 0.2615  |
| 560 HH21 | 8.3728  | 22.1460 | 2.1385 H     | 34 ARG286 | 0.2615  |
| 561 HH22 | 7.8541  | 21.2824 | 3.5811 H     | 34 ARG286 | 0.2615  |
| 562 N    | 5.5437  | 17.6580 | -5.3986 N.am | 35 ALA287 | -0.2640 |
| BACKBONE |         |         |              |           |         |
| 563 CA   | 4.7542  | 16.8594 | -6.3421 C.3  | 35 ALA287 | 0.1282  |
| BACKBONE |         |         |              |           |         |
| 564 C    | 5.0808  | 15.3788 | -6.3564 C.2  | 35 ALA287 | 0.2034  |
| BACKBONE |         |         |              |           |         |
| 565 O    | 4.6555  | 14.7050 | -7.2856 O.2  | 35 ALA287 | -0.3944 |
| BACKBONE |         |         |              |           |         |
| 566 CB   | 4.7768  | 17.4983 | -7.7506 C.3  | 35 ALA287 | -0.0244 |
| 567 H    | 6.3123  | 18.2046 | -5.7515 H    | 35 ALA287 | 0.1883  |
| 568 HA   | 3.7042  | 16.8729 | -6.0422 H    | 35 ALA287 | 0.0797  |
| 569 HB3  | 5.8119  | 17.4862 | -8.1096 H    | 35 ALA287 | 0.0277  |
| 570 HB2  | 4.4254  | 18.5397 | -7.6852 H    | 35 ALA287 | 0.0277  |
| 571 HB1  | 4.1400  | 16.9579 | -8.4682 H    | 35 ALA287 | 0.0277  |
| 572 N    | 5.7921  | 14.8404 | -5.3345 N.am | 36 GLY288 | -0.2664 |
| BACKBONE |         |         |              |           |         |
| 573 CA   | 6.0443  | 13.4027 | -5.2713 C.3  | 36 GLY288 | 0.1201  |
| BACKBONE |         |         |              |           |         |
| 574 C    | 7.3414  | 13.0182 | -5.9344 C.2  | 36 GLY288 | 0.2009  |
| BACKBONE |         |         |              |           |         |

|          |         |         |          |      |    |        |         |
|----------|---------|---------|----------|------|----|--------|---------|
| 575 O    | 7.6760  | 11.8436 | -5.8934  | O.2  | 36 | GLY288 | -0.3947 |
| BACKBONE |         |         |          |      |    |        |         |
| 576 H    | 6.1829  | 15.3981 | -4.6005  | H    | 36 | GLY288 | 0.1881  |
| 577 HA2  | 5.2357  | 12.8316 | -5.7519  | H    | 36 | GLY288 | 0.0763  |
| 578 HA3  | 6.0895  | 13.0717 | -4.2224  | H    | 36 | GLY288 | 0.0763  |
| 579 N    | 8.0982  | 13.9471 | -6.5631  | N.am | 37 | PHE289 | -0.2622 |
| BACKBONE |         |         |          |      |    |        |         |
| 580 CA   | 9.2413  | 13.5028 | -7.3547  | C.3  | 37 | PHE289 | 0.1404  |
| BACKBONE |         |         |          |      |    |        |         |
| 581 C    | 10.5484 | 13.4856 | -6.6059  | C.2  | 37 | PHE289 | 0.2061  |
| BACKBONE |         |         |          |      |    |        |         |
| 582 O    | 10.7231 | 14.2704 | -5.6900  | O.2  | 37 | PHE289 | -0.3942 |
| BACKBONE |         |         |          |      |    |        |         |
| 583 CB   | 9.4769  | 14.4109 | -8.5823  | C.3  | 37 | PHE289 | 0.0214  |
| 584 CG   | 8.3324  | 14.3000 | -9.5862  | C.ar | 37 | PHE289 | -0.0386 |
| 585 CD1  | 8.1421  | 13.1099 | -10.3004 | C.ar | 37 | PHE289 | -0.0601 |
| 586 CD2  | 7.4781  | 15.3847 | -9.8140  | C.ar | 37 | PHE289 | -0.0601 |
| 587 CE1  | 7.1180  | 12.9995 | -11.2325 | C.ar | 37 | PHE289 | -0.0686 |
| 588 CE2  | 6.4902  | 15.3021 | -10.7884 | C.ar | 37 | PHE289 | -0.0686 |
| 589 CZ   | 6.2897  | 14.0998 | -11.4772 | C.ar | 37 | PHE289 | -0.0687 |
| 590 H    | 7.9032  | 14.9342 | -6.5327  | H    | 37 | PHE289 | 0.1885  |
| 591 HA   | 9.0469  | 12.4957 | -7.7355  | H    | 37 | PHE289 | 0.0823  |
| 592 HB3  | 10.3881 | 14.1008 | -9.1042  | H    | 37 | PHE289 | 0.0474  |
| 593 HB2  | 9.6223  | 15.4456 | -8.2458  | H    | 37 | PHE289 | 0.0474  |
| 594 HD1  | 8.8012  | 12.2669 | -10.1357 | H    | 37 | PHE289 | 0.0557  |
| 595 HD2  | 7.5922  | 16.2917 | -9.2328  | H    | 37 | PHE289 | 0.0557  |
| 596 HE1  | 6.9641  | 12.0688 | -11.7736 | H    | 37 | PHE289 | 0.0599  |
| 597 HE2  | 5.8828  | 16.1723 | -11.0145 | H    | 37 | PHE289 | 0.0599  |
| 598 HZ   | 5.5037  | 14.0142 | -12.2061 | H    | 37 | PHE289 | 0.0559  |
| 599 N    | 11.5007 | 12.6176 | -7.0173  | N.am | 38 | TYR290 | -0.2620 |
| BACKBONE |         |         |          |      |    |        |         |
| 600 CA   | 12.8706 | 12.7210 | -6.5180  | C.3  | 38 | TYR290 | 0.1390  |
| BACKBONE |         |         |          |      |    |        |         |
| 601 C    | 13.8448 | 12.7050 | -7.6797  | C.2  | 38 | TYR290 | 0.2057  |
| BACKBONE |         |         |          |      |    |        |         |
| 602 O    | 13.5605 | 12.0168 | -8.6487  | O.2  | 38 | TYR290 | -0.3942 |
| BACKBONE |         |         |          |      |    |        |         |
| 603 CB   | 13.1518 | 11.6078 | -5.4792  | C.3  | 38 | TYR290 | 0.0163  |
| 604 CG   | 13.0173 | 10.1861 | -6.0347  | C.ar | 38 | TYR290 | -0.0493 |
| 605 CD1  | 14.1564 | 9.4650  | -6.4121  | C.ar | 38 | TYR290 | -0.0685 |
| 606 CD2  | 11.7574 | 9.5889  | -6.1443  | C.ar | 38 | TYR290 | -0.0685 |
| 607 CE1  | 14.0542 | 8.1098  | -6.7394  | C.ar | 38 | TYR290 | -0.0398 |
| 608 CE2  | 11.6511 | 8.2775  | -6.6159  | C.ar | 38 | TYR290 | -0.0398 |
| 609 CZ   | 12.7957 | 7.5024  | -6.8198  | C.ar | 38 | TYR290 | 0.0805  |
| 610 OH   | 12.6655 | 6.1363  | -7.0901  | O.3  | 38 | TYR290 | -0.3376 |
| 611 H    | 11.3102 | 11.9045 | -7.6992  | H    | 38 | TYR290 | 0.1885  |
| 612 HA   | 13.0161 | 13.6824 | -6.0019  | H    | 38 | TYR290 | 0.0821  |
| 613 HB2  | 12.4394 | 11.7302 | -4.6536  | H    | 38 | TYR290 | 0.0453  |
| 614 HB3  | 14.1619 | 11.7055 | -5.0661  | H    | 38 | TYR290 | 0.0453  |
| 615 HD1  | 15.1296 | 9.9490  | -6.4442  | H    | 38 | TYR290 | 0.0530  |
| 616 HD2  | 10.8608 | 10.1377 | -5.8655  | H    | 38 | TYR290 | 0.0530  |
| 617 HE1  | 14.9565 | 7.5353  | -6.9252  | H    | 38 | TYR290 | 0.0525  |



|          |         |         |               |           |         |
|----------|---------|---------|---------------|-----------|---------|
| 618 HE2  | 10.6801 | 7.8542  | -6.8312 H     | 38 TYR290 | 0.0525  |
| 619 HH   | 13.4675 | 5.7497  | -7.4277 H     | 38 TYR290 | 0.2458  |
| 620 N    | 14.9728 | 13.4576 | -7.6247 N.am  | 39 ALA291 | -0.2639 |
| BACKBONE |         |         |               |           |         |
| 621 CA   | 15.9308 | 13.4306 | -8.7312 C.3   | 39 ALA291 | 0.1282  |
| BACKBONE |         |         |               |           |         |
| 622 C    | 16.6437 | 12.0975 | -8.7856 C.2   | 39 ALA291 | 0.2036  |
| BACKBONE |         |         |               |           |         |
| 623 O    | 16.9363 | 11.5686 | -7.7246 O.2   | 39 ALA291 | -0.3944 |
| BACKBONE |         |         |               |           |         |
| 624 CB   | 17.0169 | 14.5308 | -8.5906 C.3   | 39 ALA291 | -0.0244 |
| 625 H    | 15.1952 | 14.0334 | -6.8365 H     | 39 ALA291 | 0.1883  |
| 626 HA   | 15.4003 | 13.6243 | -9.6714 H     | 39 ALA291 | 0.0797  |
| 627 HB3  | 17.6009 | 14.3812 | -7.6693 H     | 39 ALA291 | 0.0277  |
| 628 HB2  | 16.5545 | 15.5244 | -8.5517 H     | 39 ALA291 | 0.0277  |
| 629 HB1  | 17.7016 | 14.5082 | -9.4505 H     | 39 ALA291 | 0.0277  |
| 630 N    | 16.9588 | 11.5475 | -9.9834 N.am  | 40 LEU292 | -0.2637 |
| BACKBONE |         |         |               |           |         |
| 631 CA   | 17.7704 | 10.3257 | -10.0349 C.3  | 40 LEU292 | 0.1312  |
| BACKBONE |         |         |               |           |         |
| 632 C    | 19.2518 | 10.6190 | -10.1682 C.2  | 40 LEU292 | 0.2037  |
| BACKBONE |         |         |               |           |         |
| 633 O    | 20.0209 | 9.6725  | -10.1961 O.2  | 40 LEU292 | -0.3944 |
| BACKBONE |         |         |               |           |         |
| 634 CB   | 17.3283 | 9.4098  | -11.2089 C.3  | 40 LEU292 | -0.0101 |
| 635 CG   | 15.8424 | 8.9448  | -11.1339 C.3  | 40 LEU292 | -0.0425 |
| 636 CD1  | 15.5589 | 7.9869  | -12.3215 C.3  | 40 LEU292 | -0.0625 |
| 637 CD2  | 15.5202 | 8.2141  | -9.8016 C.3   | 40 LEU292 | -0.0625 |
| 638 H    | 16.7035 | 11.9904 | -10.8538 H    | 40 LEU292 | 0.1883  |
| 639 HA   | 17.6914 | 9.7412  | -9.1043 H     | 40 LEU292 | 0.0800  |
| 640 HB3  | 17.9728 | 8.5151  | -11.2240 H    | 40 LEU292 | 0.0315  |
| 641 HB2  | 17.4927 | 9.9555  | -12.1530 H    | 40 LEU292 | 0.0315  |
| 642 HG   | 15.1838 | 9.8276  | -11.2239 H    | 40 LEU292 | 0.0298  |
| 643 HD13 | 15.8429 | 8.4737  | -13.2589 H    | 40 LEU292 | 0.0232  |
| 644 HD12 | 14.4958 | 7.7185  | -12.3824 H    | 40 LEU292 | 0.0232  |
| 645 HD11 | 16.1488 | 7.0639  | -12.2252 H    | 40 LEU292 | 0.0232  |
| 646 HD23 | 16.2614 | 7.4258  | -9.5979 H     | 40 LEU292 | 0.0232  |
| 647 HD22 | 14.5277 | 7.7450  | -9.8403 H     | 40 LEU292 | 0.0232  |
| 648 HD21 | 15.5164 | 8.9317  | -8.9699 H     | 40 LEU292 | 0.0232  |
| 649 N    | 19.7164 | 11.8846 | -10.2529 N.am | 41 GLY293 | -0.2664 |
| BACKBONE |         |         |               |           |         |
| 650 CA   | 21.1490 | 12.1139 | -10.4476 C.3  | 41 GLY293 | 0.1201  |
| BACKBONE |         |         |               |           |         |
| 651 C    | 21.5700 | 11.9451 | -11.8888 C.2  | 41 GLY293 | 0.2007  |
| BACKBONE |         |         |               |           |         |
| 652 O    | 22.7561 | 11.7607 | -12.1096 O.2  | 41 GLY293 | -0.3947 |
| BACKBONE |         |         |               |           |         |
| 653 H    | 19.1068 | 12.6746 | -10.2330 H    | 41 GLY293 | 0.1881  |
| 654 HA2  | 21.7402 | 11.4214 | -9.8263 H     | 41 GLY293 | 0.0763  |
| 655 HA3  | 21.4285 | 13.1377 | -10.1528 H    | 41 GLY293 | 0.0763  |
| 656 N    | 20.6523 | 12.0224 | -12.8828 N.am | 42 GLU294 | -0.2639 |
| BACKBONE |         |         |               |           |         |

|          |         |         |          |       |    |        |         |
|----------|---------|---------|----------|-------|----|--------|---------|
| 657 CA   | 21.0526 | 11.8774 | -14.2836 | C.3   | 42 | GLU294 | 0.1324  |
| BACKBONE |         |         |          |       |    |        |         |
| 658 C    | 20.3833 | 12.9701 | -15.0951 | C.2   | 42 | GLU294 | 0.2038  |
| BACKBONE |         |         |          |       |    |        |         |
| 659 O    | 19.1921 | 12.8804 | -15.3486 | O.2   | 42 | GLU294 | -0.3944 |
| BACKBONE |         |         |          |       |    |        |         |
| 660 CB   | 20.6788 | 10.4498 | -14.7676 | C.3   | 42 | GLU294 | -0.0008 |
| 661 CG   | 21.1940 | 10.1891 | -16.2098 | C.3   | 42 | GLU294 | 0.0044  |
| 662 CD   | 21.0180 | 8.7616  | -16.6488 | C.2   | 42 | GLU294 | 0.0350  |
| 663 OE1  | 21.0859 | 7.8529  | -15.7805 | O.co2 | 42 | GLU294 | -0.5690 |
| 664 OE2  | 20.8316 | 8.5427  | -17.8742 | O.co2 | 42 | GLU294 | -0.5690 |
| 665 H    | 19.6767 | 12.1617 | -12.7010 | H     | 42 | GLU294 | 0.1883  |
| 666 HA   | 22.1435 | 11.9752 | -14.3995 | H     | 42 | GLU294 | 0.0801  |
| 667 HB3  | 19.5872 | 10.3013 | -14.7306 | H     | 42 | GLU294 | 0.0330  |
| 668 HB2  | 21.1449 | 9.7258  | -14.0774 | H     | 42 | GLU294 | 0.0330  |
| 669 HG3  | 22.2743 | 10.3887 | -16.2710 | H     | 42 | GLU294 | 0.0433  |
| 670 HG2  | 20.6721 | 10.8581 | -16.9123 | H     | 42 | GLU294 | 0.0433  |
| 671 N    | 21.1023 | 14.0378 | -15.5129 | N.am  | 43 | GLY295 | -0.2664 |
| BACKBONE |         |         |          |       |    |        |         |
| 672 CA   | 20.4317 | 15.0970 | -16.2691 | C.3   | 43 | GLY295 | 0.1201  |
| BACKBONE |         |         |          |       |    |        |         |
| 673 C    | 19.3836 | 15.7376 | -15.3930 | C.2   | 43 | GLY295 | 0.2008  |
| BACKBONE |         |         |          |       |    |        |         |
| 674 O    | 19.6634 | 15.9408 | -14.2210 | O.2   | 43 | GLY295 | -0.3947 |
| BACKBONE |         |         |          |       |    |        |         |
| 675 H    | 22.0690 | 14.1515 | -15.2842 | H     | 43 | GLY295 | 0.1881  |
| 676 HA2  | 19.9720 | 14.6630 | -17.1718 | H     | 43 | GLY295 | 0.0763  |
| 677 HA3  | 21.1289 | 15.8891 | -16.5852 | H     | 43 | GLY295 | 0.0763  |
| 678 N    | 18.1789 | 16.0469 | -15.9266 | N.am  | 44 | ASP296 | -0.2624 |
| BACKBONE |         |         |          |       |    |        |         |
| 679 CA   | 17.0692 | 16.4632 | -15.0743 | C.3   | 44 | ASP296 | 0.1423  |
| BACKBONE |         |         |          |       |    |        |         |
| 680 C    | 16.1481 | 15.2777 | -14.8596 | C.2   | 44 | ASP296 | 0.2056  |
| BACKBONE |         |         |          |       |    |        |         |
| 681 O    | 14.9656 | 15.4812 | -14.6284 | O.2   | 44 | ASP296 | -0.3943 |
| BACKBONE |         |         |          |       |    |        |         |
| 682 CB   | 16.3478 | 17.6892 | -15.7020 | C.3   | 44 | ASP296 | 0.0406  |
| 683 CG   | 15.8834 | 17.4129 | -17.1094 | C.2   | 44 | ASP296 | 0.0393  |
| 684 OD1  | 16.4951 | 16.5243 | -17.7652 | O.co2 | 44 | ASP296 | -0.5688 |
| 685 OD2  | 14.9204 | 18.0769 | -17.5843 | O.co2 | 44 | ASP296 | -0.5688 |
| 686 H    | 17.9455 | 15.9296 | -16.9036 | H     | 44 | ASP296 | 0.1884  |
| 687 HA   | 17.4099 | 16.7595 | -14.0698 | H     | 44 | ASP296 | 0.0819  |
| 688 HB3  | 17.0680 | 18.5162 | -15.7640 | H     | 44 | ASP296 | 0.0478  |
| 689 HB2  | 15.5010 | 18.0163 | -15.0794 | H     | 44 | ASP296 | 0.0478  |
| 690 O    | 9.3860  | 12.0831 | -19.6903 | O.2   | 45 | LYS297 | -0.3942 |
| BACKBONE |         |         |          |       |    |        |         |
| 691 C    | 8.5493  | 12.0913 | -20.5799 | C.2   | 45 | LYS297 | 0.2067  |
| BACKBONE |         |         |          |       |    |        |         |
| 692 N    | 7.6579  | 11.0614 | -20.6747 | N.am  | 45 | LYS297 | -0.2498 |
| BACKBONE |         |         |          |       |    |        |         |
| 693 C    | 7.8175  | 9.8742  | -19.8375 | C.3   | 45 | LYS297 | 0.1338  |
| BACKBONE |         |         |          |       |    |        |         |

|          |         |         |               |    |        |         |
|----------|---------|---------|---------------|----|--------|---------|
| 694 H    | 7.5690  | 10.1410 | -18.8049 H    | 45 | LYS297 | 0.0802  |
| 695 C    | 9.1769  | 9.2182  | -19.9469 C.2  | 45 | LYS297 | 0.2038  |
| BACKBONE |         |         |               |    |        |         |
| 696 N    | 9.9408  | 9.0959  | -18.8435 N.am | 45 | LYS297 | -0.2719 |
| BACKBONE |         |         |               |    |        |         |
| 697 H    | 9.5981  | 9.3844  | -17.9496 H    | 45 | LYS297 | 0.1879  |
| 698 C    | 11.3067 | 8.5958  | -18.9554 C.3  | 45 | LYS297 | 0.0721  |
| BACKBONE |         |         |               |    |        |         |
| 699 H    | 11.8343 | 9.0931  | -19.7892 H    | 45 | LYS297 | 0.0703  |
| 700 C    | 12.0402 | 8.9087  | -17.6678 C.ar | 45 | LYS297 | -0.0244 |
| BACKBONE |         |         |               |    |        |         |
| 701 C    | 12.4541 | 7.7851  | -16.9923 C.ar | 45 | LYS297 | -0.0075 |
| BACKBONE |         |         |               |    |        |         |
| 702 C    | 11.9741 | 6.5271  | -17.6886 C.3  | 45 | LYS297 | -0.0199 |
| BACKBONE |         |         |               |    |        |         |
| 703 H    | 12.7728 | 5.7794  | -17.8183 H    | 45 | LYS297 | 0.0389  |
| 704 H    | 11.1566 | 6.0992  | -17.0867 H    | 45 | LYS297 | 0.0389  |
| 705 C    | 11.4394 | 7.0496  | -19.0530 C.3  | 45 | LYS297 | -0.0141 |
| BACKBONE |         |         |               |    |        |         |
| 706 H    | 12.1848 | 6.8031  | -19.8262 H    | 45 | LYS297 | 0.0326  |
| 707 H    | 10.4863 | 6.5755  | -19.3319 H    | 45 | LYS297 | 0.0326  |
| 708 C    | 13.2051 | 7.9039  | -15.8087 C.ar | 45 | LYS297 | 0.1169  |
| BACKBONE |         |         |               |    |        |         |
| 709 C    | 13.3024 | 9.1587  | -15.2163 C.ar | 45 | LYS297 | -0.0440 |
| BACKBONE |         |         |               |    |        |         |
| 710 H    | 13.6917 | 9.2877  | -14.2125 H    | 45 | LYS297 | 0.0468  |
| 711 C    | 12.8969 | 10.3040 | -15.9239 C.ar | 45 | LYS297 | -0.0838 |
| BACKBONE |         |         |               |    |        |         |
| 712 H    | 13.0771 | 11.2798 | -15.5069 H    | 45 | LYS297 | 0.0515  |
| 713 C    | 12.2745 | 10.1921 | -17.1608 C.ar | 45 | LYS297 | -0.0756 |
| BACKBONE |         |         |               |    |        |         |
| 714 H    | 11.9540 | 11.0583 | -17.7199 H    | 45 | LYS297 | 0.0448  |
| 715 O    | 13.8241 | 6.7848  | -15.2502 O.3  | 45 | LYS297 | -0.1878 |
| BACKBONE |         |         |               |    |        |         |
| 716 S    | 15.0736 | 6.2955  | -15.9611 S.o2 | 45 | LYS297 | 0.0426  |
| 717 O    | 16.1887 | 6.5258  | -15.0695 O.2  | 45 | LYS297 | -0.1587 |
| BACKBONE |         |         |               |    |        |         |
| 718 O    | 14.8331 | 4.9126  | -16.3475 O.2  | 45 | LYS297 | -0.1587 |
| BACKBONE |         |         |               |    |        |         |
| 719 N1   | 15.2469 | 7.2290  | -17.3244 N.am | 45 | LYS297 | -0.5394 |
| 720 O    | 9.5596  | 8.8077  | -21.0304 O.2  | 45 | LYS297 | -0.3944 |
| BACKBONE |         |         |               |    |        |         |
| 721 C    | 6.7084  | 8.9484  | -20.3956 C.3  | 45 | LYS297 | -0.0104 |
| BACKBONE |         |         |               |    |        |         |
| 722 H    | 7.0782  | 8.3668  | -21.2564 H    | 45 | LYS297 | 0.0313  |
| 723 H    | 6.3116  | 8.2500  | -19.6379 H    | 45 | LYS297 | 0.0313  |
| 724 C    | 5.6587  | 9.9552  | -20.9113 C.3  | 45 | LYS297 | -0.0281 |
| BACKBONE |         |         |               |    |        |         |
| 725 H    | 5.1338  | 10.3729 | -20.0351 H    | 45 | LYS297 | 0.0287  |
| 726 H    | 4.9201  | 9.5057  | -21.5954 H    | 45 | LYS297 | 0.0287  |
| 727 C    | 6.5119  | 11.0654 | -21.5742 C.3  | 45 | LYS297 | 0.0369  |
| BACKBONE |         |         |               |    |        |         |

|          |         |         |               |           |         |
|----------|---------|---------|---------------|-----------|---------|
| 728 H    | 5.9296  | 11.9964 | -21.5795 H    | 45 LYS297 | 0.0524  |
| 729 H    | 6.8222  | 10.7903 | -22.5948 H    | 45 LYS297 | 0.0524  |
| 730 C    | 8.6052  | 13.2750 | -21.5383 C.3  | 45 LYS297 | 0.1339  |
| BACKBONE |         |         |               |           |         |
| 731 H    | 7.6442  | 13.3517 | -22.0600 H    | 45 LYS297 | 0.0803  |
| 732 N    | 8.7846  | 14.5402 | -20.7909 N.am | 45 LYS297 | -0.2641 |
| BACKBONE |         |         |               |           |         |
| 733 H    | 9.6945  | 14.7805 | -20.4461 H    | 45 LYS297 | 0.1883  |
| 734 C    | 7.7366  | 15.3712 | -20.5540 C.2  | 45 LYS297 | 0.1952  |
| BACKBONE |         |         |               |           |         |
| 735 C    | 7.9608  | 16.7464 | -19.9406 C.3  | 45 LYS297 | 0.0951  |
| BACKBONE |         |         |               |           |         |
| 736 H    | 8.7720  | 17.2330 | -20.5109 H    | 45 LYS297 | 0.0700  |
| 737 N    | 6.7435  | 17.6046 | -19.9950 N.3  | 45 LYS297 | -0.2998 |
| BACKBONE |         |         |               |           |         |
| 738 H    | 6.8930  | 18.5164 | -19.4150 H    | 45 LYS297 | 0.1245  |
| 739 C    | 6.2464  | 17.9784 | -21.3332 C.3  | 45 LYS297 | -0.0133 |
| BACKBONE |         |         |               |           |         |
| 740 H    | 6.9717  | 18.6185 | -21.8627 H    | 45 LYS297 | 0.0390  |
| 741 H    | 6.0284  | 17.1034 | -21.9609 H    | 45 LYS297 | 0.0390  |
| 742 H    | 5.3090  | 18.5421 | -21.2005 H    | 45 LYS297 | 0.0390  |
| 743 C    | 8.4032  | 16.6123 | -18.4619 C.3  | 45 LYS297 | -0.0322 |
| BACKBONE |         |         |               |           |         |
| 744 H    | 7.5800  | 16.2004 | -17.8599 H    | 45 LYS297 | 0.0269  |
| 745 H    | 9.2816  | 15.9580 | -18.3762 H    | 45 LYS297 | 0.0269  |
| 746 H    | 8.6700  | 17.5991 | -18.0529 H    | 45 LYS297 | 0.0269  |
| 747 O    | 6.5975  | 15.0410 | -20.8403 O.2  | 45 LYS297 | -0.3952 |
| BACKBONE |         |         |               |           |         |
| 748 C    | 9.6453  | 13.0311 | -22.7025 C.3  | 45 LYS297 | -0.0006 |
| BACKBONE |         |         |               |           |         |
| 749 H    | 9.1017  | 12.8869 | -23.6553 H    | 45 LYS297 | 0.0348  |
| 750 C    | 10.5947 | 14.2418 | -22.9177 C.3  | 45 LYS297 | -0.0460 |
| BACKBONE |         |         |               |           |         |
| 751 H    | 10.0086 | 15.1684 | -23.0414 H    | 45 LYS297 | 0.0270  |
| 752 H    | 11.2456 | 14.3354 | -22.0369 H    | 45 LYS297 | 0.0270  |
| 753 C    | 11.5228 | 14.0483 | -24.1446 C.3  | 45 LYS297 | -0.0526 |
| BACKBONE |         |         |               |           |         |
| 754 H    | 12.1688 | 14.9354 | -24.2644 H    | 45 LYS297 | 0.0265  |
| 755 H    | 10.9213 | 13.9440 | -25.0625 H    | 45 LYS297 | 0.0265  |
| 756 C    | 12.4008 | 12.7872 | -23.9405 C.3  | 45 LYS297 | -0.0530 |
| BACKBONE |         |         |               |           |         |
| 757 H    | 13.0589 | 12.9295 | -23.0688 H    | 45 LYS297 | 0.0265  |
| 758 H    | 13.0434 | 12.6334 | -24.8238 H    | 45 LYS297 | 0.0265  |
| 759 C    | 11.5006 | 11.5439 | -23.7177 C.3  | 45 LYS297 | -0.0526 |
| BACKBONE |         |         |               |           |         |
| 760 H    | 12.1350 | 10.6623 | -23.5185 H    | 45 LYS297 | 0.0265  |
| 761 H    | 10.9269 | 11.3461 | -24.6382 H    | 45 LYS297 | 0.0265  |
| 762 C    | 10.5167 | 11.7507 | -22.5317 C.3  | 45 LYS297 | -0.0460 |
| BACKBONE |         |         |               |           |         |
| 763 H    | 11.0909 | 11.8283 | -21.5979 H    | 45 LYS297 | 0.0270  |
| 764 H    | 9.8696  | 10.8604 | -22.4718 H    | 45 LYS297 | 0.0270  |

|          |         |         |          |      |    |        |         |
|----------|---------|---------|----------|------|----|--------|---------|
| 765 N    | 16.6348 | 14.0087 | -14.8991 | N.am | 45 | LYS297 | -0.2636 |
| BACKBONE |         |         |          |      |    |        |         |
| 766 CA   | 15.7025 | 12.8963 | -14.6881 | C.3  | 45 | LYS297 | 0.1310  |
| BACKBONE |         |         |          |      |    |        |         |
| 767 C    | 15.1351 | 12.9445 | -13.2695 | C.2  | 45 | LYS297 | 0.2039  |
| BACKBONE |         |         |          |      |    |        |         |
| 768 O    | 15.9070 | 12.9190 | -12.3173 | O.2  | 45 | LYS297 | -0.3944 |
| BACKBONE |         |         |          |      |    |        |         |
| 769 CB   | 16.2815 | 11.4489 | -14.8675 | C.3  | 45 | LYS297 | -0.0124 |
| 770 CG   | 16.2930 | 10.8719 | -16.3131 | C.3  | 45 | LYS297 | -0.0502 |
| 771 CD   | 16.4201 | 9.3108  | -16.3189 | C.3  | 45 | LYS297 | -0.0687 |
| 772 CE   | 15.7714 | 8.6022  | -17.5512 | C.3  | 45 | LYS297 | -0.1233 |
| 773 H    | 17.6024 | 13.7916 | -15.0702 | H    | 45 | LYS297 | 0.1883  |
| 774 HA   | 14.8878 | 13.0052 | -15.4263 | H    | 45 | LYS297 | 0.0800  |
| 775 HB3  | 15.6156 | 10.8003 | -14.2680 | H    | 45 | LYS297 | 0.0312  |
| 776 HB2  | 17.2881 | 11.4140 | -14.4068 | H    | 45 | LYS297 | 0.0312  |
| 777 HG3  | 17.1033 | 11.3333 | -16.9019 | H    | 45 | LYS297 | 0.0267  |
| 778 HG2  | 15.3407 | 11.1333 | -16.7900 | H    | 45 | LYS297 | 0.0267  |
| 779 HD3  | 15.8465 | 8.9067  | -15.4826 | H    | 45 | LYS297 | 0.0251  |
| 780 HD2  | 17.4720 | 9.0005  | -16.1766 | H    | 45 | LYS297 | 0.0251  |
| 781 HE3  | 16.4949 | 8.6140  | -18.3993 | H    | 45 | LYS297 | 0.0062  |
| 782 HE2  | 14.9267 | 9.2318  | -17.9086 | H    | 45 | LYS297 | 0.0062  |
| 783 N    | 13.7873 | 12.8980 | -13.1113 | N.am | 46 | VAL298 | -0.2635 |
| BACKBONE |         |         |          |      |    |        |         |
| 784 CA   | 13.2118 | 12.6947 | -11.7833 | C.3  | 46 | VAL298 | 0.1332  |
| BACKBONE |         |         |          |      |    |        |         |
| 785 C    | 12.2489 | 11.5350 | -11.7848 | C.2  | 46 | VAL298 | 0.2041  |
| BACKBONE |         |         |          |      |    |        |         |
| 786 O    | 11.8258 | 11.1268 | -12.8558 | O.2  | 46 | VAL298 | -0.3944 |
| BACKBONE |         |         |          |      |    |        |         |
| 787 CB   | 12.4747 | 13.9705 | -11.2867 | C.3  | 46 | VAL298 | -0.0063 |
| 788 CG1  | 13.3105 | 15.2529 | -11.5333 | C.3  | 46 | VAL298 | -0.0584 |
| 789 CG2  | 11.0779 | 14.1147 | -11.9585 | C.3  | 46 | VAL298 | -0.0584 |
| 790 H    | 13.1505 | 12.9843 | -13.8867 | H    | 46 | VAL298 | 0.1883  |
| 791 HA   | 13.9917 | 12.4011 | -11.0671 | H    | 46 | VAL298 | 0.0802  |
| 792 HB   | 12.3565 | 13.8667 | -10.1970 | H    | 46 | VAL298 | 0.0343  |
| 793 HG13 | 14.3160 | 15.1670 | -11.0978 | H    | 46 | VAL298 | 0.0234  |
| 794 HG12 | 12.8062 | 16.1194 | -11.0796 | H    | 46 | VAL298 | 0.0234  |
| 795 HG11 | 13.4090 | 15.4332 | -12.6128 | H    | 46 | VAL298 | 0.0234  |
| 796 HG23 | 11.1805 | 14.2135 | -13.0483 | H    | 46 | VAL298 | 0.0234  |
| 797 HG22 | 10.5619 | 15.0029 | -11.5708 | H    | 46 | VAL298 | 0.0234  |
| 798 HG21 | 10.4309 | 13.2490 | -11.7613 | H    | 46 | VAL298 | 0.0234  |
| 799 N    | 11.8657 | 11.0112 | -10.5931 | N.am | 47 | LYS299 | -0.2637 |
| BACKBONE |         |         |          |      |    |        |         |
| 800 CA   | 10.9042 | 9.9061  | -10.5484 | C.3  | 47 | LYS299 | 0.1310  |
| BACKBONE |         |         |          |      |    |        |         |
| 801 C    | 9.8669  | 10.0051 | -9.4466  | C.2  | 47 | LYS299 | 0.2039  |
| BACKBONE |         |         |          |      |    |        |         |
| 802 O    | 10.2030 | 10.5139 | -8.3894  | O.2  | 47 | LYS299 | -0.3944 |
| BACKBONE |         |         |          |      |    |        |         |
| 803 CB   | 11.7293 | 8.6025  | -10.4359 | C.3  | 47 | LYS299 | -0.0122 |
| 804 CG   | 10.9066 | 7.3290  | -10.7569 | C.3  | 47 | LYS299 | -0.0440 |

|          |      |         |         |          |      |    |        |         |
|----------|------|---------|---------|----------|------|----|--------|---------|
| 805      | CD   | 11.8228 | 6.0749  | -10.7384 | C.3  | 47 | LYS299 | -0.0124 |
| 806      | CE   | 11.1044 | 4.7818  | -11.2169 | C.3  | 47 | LYS299 | -0.0354 |
| 807      | NZ   | 10.6886 | 4.8412  | -12.6410 | N.4  | 47 | LYS299 | 0.2185  |
| 808      | H    | 12.2779 | 11.3189 | -9.7301  | H    | 47 | LYS299 | 0.1883  |
| 809      | HA   | 10.3321 | 9.9117  | -11.4805 | H    | 47 | LYS299 | 0.0800  |
| 810      | HB3  | 12.1580 | 8.5475  | -9.4242  | H    | 47 | LYS299 | 0.0312  |
| 811      | HB2  | 12.5549 | 8.6764  | -11.1603 | H    | 47 | LYS299 | 0.0312  |
| 812      | HG3  | 10.4706 | 7.4646  | -11.7554 | H    | 47 | LYS299 | 0.0269  |
| 813      | HG2  | 10.0894 | 7.2067  | -10.0284 | H    | 47 | LYS299 | 0.0269  |
| 814      | HD3  | 12.1876 | 5.9288  | -9.7086  | H    | 47 | LYS299 | 0.0317  |
| 815      | HD2  | 12.6993 | 6.2398  | -11.3846 | H    | 47 | LYS299 | 0.0317  |
| 816      | HE3  | 10.2357 | 4.5928  | -10.5630 | H    | 47 | LYS299 | 0.0813  |
| 817      | HE2  | 11.8098 | 3.9413  | -11.0797 | H    | 47 | LYS299 | 0.0813  |
| 818      | HZ3  | 9.8707  | 5.5240  | -12.8275 | H    | 47 | LYS299 | 0.1994  |
| 819      | HZ2  | 10.3022 | 3.8931  | -12.9887 | H    | 47 | LYS299 | 0.1994  |
| 820      | HZ1  | 11.4989 | 5.1118  | -13.3059 | H    | 47 | LYS299 | 0.1994  |
| 821      | N    | 8.6042  | 9.5583  | -9.6788  | N.am | 48 | CYS300 | -0.2629 |
| BACKBONE |      |         |         |          |      |    |        |         |
| 822      | CA   | 7.5656  | 9.6627  | -8.6484  | C.3  | 48 | CYS300 | 0.1406  |
| BACKBONE |      |         |         |          |      |    |        |         |
| 823      | C    | 7.7076  | 8.5401  | -7.6373  | C.2  | 48 | CYS300 | 0.2049  |
| BACKBONE |      |         |         |          |      |    |        |         |
| 824      | O    | 7.6313  | 7.3879  | -8.0326  | O.2  | 48 | CYS300 | -0.3943 |
| BACKBONE |      |         |         |          |      |    |        |         |
| 825      | CB   | 6.1439  | 9.6281  | -9.2726  | C.3  | 48 | CYS300 | 0.0443  |
| 826      | SG   | 4.8855  | 9.7613  | -7.9666  | S.3  | 48 | CYS300 | -0.0882 |
| 827      | H    | 8.3536  | 9.1306  | -10.5560 | H    | 48 | CYS300 | 0.1884  |
| 828      | HA   | 7.6319  | 10.6342 | -8.1443  | H    | 48 | CYS300 | 0.0808  |
| 829      | HB3  | 5.9938  | 8.6811  | -9.7994  | H    | 48 | CYS300 | 0.0432  |
| 830      | HB2  | 5.9815  | 10.4538 | -9.9811  | H    | 48 | CYS300 | 0.0432  |
| 831      | LPG2 | 4.9546  | 9.2682  | -7.5049  | LP   | 48 | CYS300 | 0.0000  |
| 832      | LPG1 | 4.9120  | 10.3655 | -7.6580  | LP   | 48 | CYS300 | 0.0000  |
| 833      | N    | 7.9069  | 8.8043  | -6.3231  | N.am | 49 | PHE301 | -0.2619 |
| BACKBONE |      |         |         |          |      |    |        |         |
| 834      | CA   | 8.0236  | 7.6885  | -5.3714  | C.3  | 49 | PHE301 | 0.1404  |
| BACKBONE |      |         |         |          |      |    |        |         |
| 835      | C    | 6.8170  | 6.7822  | -5.3680  | C.2  | 49 | PHE301 | 0.2061  |
| BACKBONE |      |         |         |          |      |    |        |         |
| 836      | O    | 6.9553  | 5.5898  | -5.1286  | O.2  | 49 | PHE301 | -0.3942 |
| BACKBONE |      |         |         |          |      |    |        |         |
| 837      | CB   | 8.2239  | 8.1509  | -3.9013  | C.3  | 49 | PHE301 | 0.0214  |
| 838      | CG   | 6.9093  | 8.5611  | -3.2155  | C.ar | 49 | PHE301 | -0.0386 |
| 839      | CD1  | 6.2373  | 7.6421  | -2.3884  | C.ar | 49 | PHE301 | -0.0601 |
| 840      | CD2  | 6.3597  | 9.8332  | -3.3770  | C.ar | 49 | PHE301 | -0.0601 |
| 841      | CE1  | 5.0791  | 8.0143  | -1.7085  | C.ar | 49 | PHE301 | -0.0686 |
| 842      | CE2  | 5.1843  | 10.2033 | -2.7259  | C.ar | 49 | PHE301 | -0.0686 |
| 843      | CZ   | 4.5424  | 9.2897  | -1.8745  | C.ar | 49 | PHE301 | -0.0687 |
| 844      | H    | 7.9800  | 9.7519  | -5.9961  | H    | 49 | PHE301 | 0.1885  |
| 845      | HA   | 8.8797  | 7.0658  | -5.6684  | H    | 49 | PHE301 | 0.0823  |
| 846      | HB3  | 8.9457  | 8.9774  | -3.8786  | H    | 49 | PHE301 | 0.0474  |
| 847      | HB2  | 8.6586  | 7.3208  | -3.3227  | H    | 49 | PHE301 | 0.0474  |
| 848      | HD1  | 6.6388  | 6.6456  | -2.2647  | H    | 49 | PHE301 | 0.0557  |

|          |      |         |         |          |       |    |        |         |
|----------|------|---------|---------|----------|-------|----|--------|---------|
| 849      | HD2  | 6.8477  | 10.5554 | -4.0159  | H     | 49 | PHE301 | 0.0557  |
| 850      | HE1  | 4.5915  | 7.3158  | -1.0311  | H     | 49 | PHE301 | 0.0599  |
| 851      | HE2  | 4.7621  | 11.1917 | -2.8700  | H     | 49 | PHE301 | 0.0599  |
| 852      | HZ   | 3.6381  | 9.5769  | -1.3500  | H     | 49 | PHE301 | 0.0559  |
| 853      | N    | 5.6190  | 7.3625  | -5.5920  | N.am  | 50 | HIS302 | -0.2617 |
| BACKBONE |      |         |         |          |       |    |        |         |
| 854      | CA   | 4.3981  | 6.5799  | -5.4843  | C.3   | 50 | HIS302 | 0.1421  |
| BACKBONE |      |         |         |          |       |    |        |         |
| 855      | C    | 4.1384  | 5.8079  | -6.7575  | C.2   | 50 | HIS302 | 0.2060  |
| BACKBONE |      |         |         |          |       |    |        |         |
| 856      | O    | 4.2621  | 4.5912  | -6.7362  | O.2   | 50 | HIS302 | -0.3942 |
| BACKBONE |      |         |         |          |       |    |        |         |
| 857      | CB   | 3.2123  | 7.4704  | -5.0302  | C.3   | 50 | HIS302 | 0.0427  |
| 858      | CG   | 2.1348  | 6.6248  | -4.3971  | C.2   | 50 | HIS302 | 0.0561  |
| 859      | ND1  | 1.4686  | 5.6836  | -5.0202  | N.pl3 | 50 | HIS302 | -0.2623 |
| 860      | CD2  | 1.7293  | 6.7094  | -3.1158  | C.2   | 50 | HIS302 | -0.0276 |
| 861      | CE1  | 0.6426  | 5.1181  | -4.2035  | C.2   | 50 | HIS302 | 0.0875  |
| 862      | NE2  | 0.7401  | 5.6642  | -3.0772  | N.2   | 50 | HIS302 | -0.3437 |
| 863      | H    | 5.5419  | 8.3342  | -5.8098  | H     | 50 | HIS302 | 0.1885  |
| 864      | HA   | 4.5577  | 5.8554  | -4.6770  | H     | 50 | HIS302 | 0.0824  |
| 865      | HB3  | 2.7991  | 8.0732  | -5.8509  | H     | 50 | HIS302 | 0.0491  |
| 866      | HB2  | 3.6021  | 8.1624  | -4.2699  | H     | 50 | HIS302 | 0.0491  |
| 867      | HD1  | 1.5880  | 5.4182  | -6.0113  | H     | 50 | HIS302 | 0.2386  |
| 868      | HD2  | 2.0538  | 7.3696  | -2.3129  | H     | 50 | HIS302 | 0.0324  |
| 869      | HE1  | -0.0382 | 4.2976  | -4.4212  | H     | 50 | HIS302 | 0.1149  |
| 870      | N    | 3.7741  | 6.4812  | -7.8727  | N.am  | 51 | CYS303 | -0.2627 |
| BACKBONE |      |         |         |          |       |    |        |         |
| 871      | CA   | 3.5433  | 5.7720  | -9.1253  | C.3   | 51 | CYS303 | 0.1406  |
| BACKBONE |      |         |         |          |       |    |        |         |
| 872      | C    | 4.8198  | 5.2684  | -9.7657  | C.2   | 51 | CYS303 | 0.2045  |
| BACKBONE |      |         |         |          |       |    |        |         |
| 873      | O    | 4.7284  | 4.3865  | -10.6062 | O.2   | 51 | CYS303 | -0.3944 |
| BACKBONE |      |         |         |          |       |    |        |         |
| 874      | CB   | 2.7066  | 6.6305  | -10.1189 | C.3   | 51 | CYS303 | 0.0443  |
| 875      | SG   | 3.4367  | 8.2233  | -10.6584 | S.3   | 51 | CYS303 | -0.0882 |
| 876      | H    | 3.6637  | 7.4797  | -7.9072  | H     | 51 | CYS303 | 0.1884  |
| 877      | HA   | 2.9402  | 4.8737  | -8.9049  | H     | 51 | CYS303 | 0.0808  |
| 878      | HB3  | 1.7481  | 6.8542  | -9.6407  | H     | 51 | CYS303 | 0.0432  |
| 879      | HB2  | 2.5075  | 6.0488  | -11.0321 | H     | 51 | CYS303 | 0.0432  |
| 880      | LPG2 | 4.1018  | 8.1532  | -10.7759 | LP    | 51 | CYS303 | 0.0000  |
| 881      | LPG1 | 3.1299  | 8.4480  | -11.2209 | LP    | 51 | CYS303 | 0.0000  |
| 882      | N    | 6.0279  | 5.7773  | -9.4294  | N.am  | 52 | GLY304 | -0.2664 |
| BACKBONE |      |         |         |          |       |    |        |         |
| 883      | CA   | 7.2260  | 5.3360  | -10.1463 | C.3   | 52 | GLY304 | 0.1201  |
| BACKBONE |      |         |         |          |       |    |        |         |
| 884      | C    | 7.4121  | 5.9788  | -11.5018 | C.2   | 52 | GLY304 | 0.2005  |
| BACKBONE |      |         |         |          |       |    |        |         |
| 885      | O    | 8.4200  | 5.7030  | -12.1375 | O.2   | 52 | GLY304 | -0.3947 |
| BACKBONE |      |         |         |          |       |    |        |         |
| 886      | H    | 6.1313  | 6.4945  | -8.7307  | H     | 52 | GLY304 | 0.1881  |
| 887      | HA2  | 7.1873  | 4.2561  | -10.3286 | H     | 52 | GLY304 | 0.0763  |
| 888      | HA3  | 8.1249  | 5.5282  | -9.5426  | H     | 52 | GLY304 | 0.0763  |

|          |         |         |          |      |    |        |         |
|----------|---------|---------|----------|------|----|--------|---------|
| 889 N    | 6.4673  | 6.8178  | -11.9767 | N.am | 53 | GLY305 | -0.2666 |
| BACKBONE |         |         |          |      |    |        |         |
| 890 CA   | 6.6256  | 7.4729  | -13.2699 | C.3  | 53 | GLY305 | 0.1201  |
| BACKBONE |         |         |          |      |    |        |         |
| 891 C    | 7.9045  | 8.2712  | -13.3332 | C.2  | 53 | GLY305 | 0.2005  |
| BACKBONE |         |         |          |      |    |        |         |
| 892 O    | 8.2444  | 8.9077  | -12.3478 | O.2  | 53 | GLY305 | -0.3947 |
| BACKBONE |         |         |          |      |    |        |         |
| 893 H    | 5.6311  | 7.0050  | -11.4677 | H    | 53 | GLY305 | 0.1881  |
| 894 HA2  | 5.8068  | 8.1932  | -13.4276 | H    | 53 | GLY305 | 0.0763  |
| 895 HA3  | 6.5679  | 6.7141  | -14.0649 | H    | 53 | GLY305 | 0.0763  |
| 896 N    | 8.6173  | 8.2640  | -14.4835 | N.am | 54 | GLY306 | -0.2666 |
| BACKBONE |         |         |          |      |    |        |         |
| 897 CA   | 9.8094  | 9.0978  | -14.6433 | C.3  | 54 | GLY306 | 0.1201  |
| BACKBONE |         |         |          |      |    |        |         |
| 898 C    | 9.5200  | 10.2770 | -15.5406 | C.2  | 54 | GLY306 | 0.2007  |
| BACKBONE |         |         |          |      |    |        |         |
| 899 O    | 8.7347  | 10.0880 | -16.4592 | O.2  | 54 | GLY306 | -0.3947 |
| BACKBONE |         |         |          |      |    |        |         |
| 900 H    | 8.3198  | 7.7385  | -15.2844 | H    | 54 | GLY306 | 0.1881  |
| 901 HA2  | 10.5911 | 8.5047  | -15.1369 | H    | 54 | GLY306 | 0.0763  |
| 902 HA3  | 10.2205 | 9.4287  | -13.6878 | H    | 54 | GLY306 | 0.0763  |
| 903 N    | 10.1459 | 11.4651 | -15.3373 | N.am | 55 | LEU307 | -0.2640 |
| BACKBONE |         |         |          |      |    |        |         |
| 904 CA   | 9.9782  | 12.5738 | -16.2867 | C.3  | 55 | LEU307 | 0.1312  |
| BACKBONE |         |         |          |      |    |        |         |
| 905 C    | 11.2844 | 13.3033 | -16.5473 | C.2  | 55 | LEU307 | 0.2040  |
| BACKBONE |         |         |          |      |    |        |         |
| 906 O    | 12.0550 | 13.4822 | -15.6159 | O.2  | 55 | LEU307 | -0.3944 |
| BACKBONE |         |         |          |      |    |        |         |
| 907 CB   | 8.9909  | 13.6465 | -15.7631 | C.3  | 55 | LEU307 | -0.0101 |
| 908 CG   | 7.5049  | 13.2023 | -15.6947 | C.3  | 55 | LEU307 | -0.0425 |
| 909 CD1  | 6.6825  | 14.3099 | -14.9836 | C.3  | 55 | LEU307 | -0.0625 |
| 910 CD2  | 6.8871  | 12.9458 | -17.0966 | C.3  | 55 | LEU307 | -0.0625 |
| 911 H    | 10.7580 | 11.6130 | -14.5506 | H    | 55 | LEU307 | 0.1883  |
| 912 HA   | 9.6400  | 12.1883 | -17.2550 | H    | 55 | LEU307 | 0.0800  |
| 913 HB3  | 9.0545  | 14.5535 | -16.3825 | H    | 55 | LEU307 | 0.0315  |
| 914 HB2  | 9.3361  | 13.8985 | -14.7509 | H    | 55 | LEU307 | 0.0315  |
| 915 HG   | 7.4568  | 12.2799 | -15.0938 | H    | 55 | LEU307 | 0.0298  |
| 916 HD13 | 7.0895  | 14.4883 | -13.9798 | H    | 55 | LEU307 | 0.0232  |
| 917 HD12 | 5.6229  | 14.0220 | -14.8947 | H    | 55 | LEU307 | 0.0232  |
| 918 HD11 | 6.7499  | 15.2511 | -15.5464 | H    | 55 | LEU307 | 0.0232  |
| 919 HD23 | 6.9414  | 13.8460 | -17.7255 | H    | 55 | LEU307 | 0.0232  |
| 920 HD22 | 5.8333  | 12.6577 | -16.9902 | H    | 55 | LEU307 | 0.0232  |
| 921 HD21 | 7.3944  | 12.1305 | -17.6192 | H    | 55 | LEU307 | 0.0232  |
| 922 N    | 11.5410 | 13.7442 | -17.8054 | N.am | 56 | THR308 | -0.2613 |
| BACKBONE |         |         |          |      |    |        |         |
| 923 CA   | 12.7991 | 14.4243 | -18.1247 | C.3  | 56 | THR308 | 0.1565  |
| BACKBONE |         |         |          |      |    |        |         |
| 924 C    | 12.6236 | 15.4467 | -19.2275 | C.2  | 56 | THR308 | 0.2066  |
| BACKBONE |         |         |          |      |    |        |         |



|          |         |         |          |       |    |        |         |
|----------|---------|---------|----------|-------|----|--------|---------|
| 925 O    | 11.5250 | 15.5469 | -19.7550 | O.2   | 56 | THR308 | -0.3943 |
| BACKBONE |         |         |          |       |    |        |         |
| 926 CB   | 13.8652 | 13.3922 | -18.5780 | C.3   | 56 | THR308 | 0.0924  |
| 927 OG1  | 15.1058 | 14.0914 | -18.7653 | O.3   | 56 | THR308 | -0.3874 |
| 928 CG2  | 13.4767 | 12.6751 | -19.8975 | C.3   | 56 | THR308 | -0.0346 |
| 929 H    | 10.8993 | 13.6016 | -18.5641 | H     | 56 | THR308 | 0.1884  |
| 930 HA   | 13.1827 | 14.9722 | -17.2472 | H     | 56 | THR308 | 0.0826  |
| 931 HB   | 13.9666 | 12.6544 | -17.7694 | H     | 56 | THR308 | 0.0639  |
| 932 HG1  | 15.8412 | 13.5196 | -18.9625 | H     | 56 | THR308 | 0.2101  |
| 933 HG22 | 14.2799 | 11.9918 | -20.2146 | H     | 56 | THR308 | 0.0257  |
| 934 HG21 | 13.3198 | 13.4183 | -20.6918 | H     | 56 | THR308 | 0.0257  |
| 935 HG23 | 12.5572 | 12.0905 | -19.7671 | H     | 56 | THR308 | 0.0257  |
| 936 N    | 13.7073 | 16.1855 | -19.5736 | N.am  | 57 | ASP309 | -0.2621 |
| BACKBONE |         |         |          |       |    |        |         |
| 937 CA   | 13.6214 | 17.2516 | -20.5765 | C.3   | 57 | ASP309 | 0.1423  |
| BACKBONE |         |         |          |       |    |        |         |
| 938 C    | 12.5654 | 18.2283 | -20.1185 | C.2   | 57 | ASP309 | 0.2057  |
| BACKBONE |         |         |          |       |    |        |         |
| 939 O    | 11.6227 | 18.5379 | -20.8319 | O.2   | 57 | ASP309 | -0.3943 |
| BACKBONE |         |         |          |       |    |        |         |
| 940 CB   | 13.3646 | 16.7337 | -22.0130 | C.3   | 57 | ASP309 | 0.0406  |
| 941 CG   | 13.5409 | 17.8195 | -23.0448 | C.2   | 57 | ASP309 | 0.0393  |
| 942 OD1  | 14.2549 | 18.8389 | -22.8228 | O.co2 | 57 | ASP309 | -0.5688 |
| 943 OD2  | 12.9431 | 17.7695 | -24.1537 | O.co2 | 57 | ASP309 | -0.5688 |
| 944 H    | 14.5908 | 16.0433 | -19.0997 | H     | 57 | ASP309 | 0.1884  |
| 945 HA   | 14.5719 | 17.8144 | -20.5885 | H     | 57 | ASP309 | 0.0819  |
| 946 HB3  | 12.3242 | 16.3890 | -22.0898 | H     | 57 | ASP309 | 0.0478  |
| 947 HB2  | 14.0562 | 15.9063 | -22.2374 | H     | 57 | ASP309 | 0.0478  |
| 948 N    | 12.7073 | 18.7275 | -18.8758 | N.am  | 58 | TRP310 | -0.2626 |
| BACKBONE |         |         |          |       |    |        |         |
| 949 CA   | 11.7248 | 19.6828 | -18.3844 | C.3   | 58 | TRP310 | 0.1352  |
| BACKBONE |         |         |          |       |    |        |         |
| 950 C    | 11.8808 | 21.0027 | -19.1108 | C.2   | 58 | TRP310 | 0.2052  |
| BACKBONE |         |         |          |       |    |        |         |
| 951 O    | 12.9924 | 21.3391 | -19.4910 | O.2   | 58 | TRP310 | -0.3942 |
| BACKBONE |         |         |          |       |    |        |         |
| 952 CB   | 11.9053 | 19.9215 | -16.8701 | C.3   | 58 | TRP310 | 0.0042  |
| 953 CG   | 11.4701 | 18.7342 | -16.0516 | C.2   | 58 | TRP310 | -0.0418 |
| 954 CD1  | 12.1963 | 17.6565 | -15.6977 | C.2   | 58 | TRP310 | 0.0167  |
| 955 CD2  | 10.1027 | 18.5423 | -15.4613 | C.ar  | 58 | TRP310 | -0.0214 |
| 956 NE1  | 11.4687 | 16.8578 | -14.9721 | N.pl3 | 58 | TRP310 | -0.2890 |
| 957 CE2  | 10.2260 | 17.3516 | -14.7733 | C.ar  | 58 | TRP310 | 0.0603  |
| 958 CE3  | 8.9032  | 19.2635 | -15.4841 | C.ar  | 58 | TRP310 | -0.0747 |
| 959 CZ2  | 9.1804  | 16.8339 | -14.0168 | C.ar  | 58 | TRP310 | -0.0443 |
| 960 CZ3  | 7.8524  | 18.7638 | -14.7085 | C.ar  | 58 | TRP310 | -0.0792 |
| 961 CH2  | 7.9804  | 17.5569 | -14.0033 | C.ar  | 58 | TRP310 | -0.0768 |
| 962 H    | 13.5128 | 18.4884 | -18.3150 | H     | 58 | TRP310 | 0.1884  |
| 963 HA   | 10.7120 | 19.2820 | -18.5648 | H     | 58 | TRP310 | 0.0815  |
| 964 HB3  | 11.2667 | 20.7711 | -16.6156 | H     | 58 | TRP310 | 0.0397  |
| 965 HB2  | 12.9499 | 20.1915 | -16.6442 | H     | 58 | TRP310 | 0.0397  |
| 966 HD1  | 13.2335 | 17.4733 | -15.9731 | H     | 58 | TRP310 | 0.0795  |
| 967 HE1  | 11.8016 | 15.9536 | -14.5997 | H     | 58 | TRP310 | 0.2216  |

|          |     |         |         |          |      |    |        |         |
|----------|-----|---------|---------|----------|------|----|--------|---------|
| 968      | HE3 | 8.8026  | 20.1613 | -16.0798 | H    | 58 | TRP310 | 0.0540  |
| 969      | HZ2 | 9.2872  | 15.9155 | -13.4558 | H    | 58 | TRP310 | 0.0541  |
| 970      | HZ3 | 6.9273  | 19.3312 | -14.6601 | H    | 58 | TRP310 | 0.0510  |
| 971      | HH2 | 7.1458  | 17.1610 | -13.4343 | H    | 58 | TRP310 | 0.0530  |
| 972      | N   | 10.7838 | 21.7703 | -19.3098 | N.am | 59 | LYS311 | -0.2636 |
| BACKBONE |     |         |         |          |      |    |        |         |
| 973      | CA  | 10.8755 | 23.0132 | -20.0776 | C.3  | 59 | LYS311 | 0.1312  |
| BACKBONE |     |         |         |          |      |    |        |         |
| 974      | C   | 10.6855 | 24.2287 | -19.1904 | C.2  | 59 | LYS311 | 0.2064  |
| BACKBONE |     |         |         |          |      |    |        |         |
| 975      | O   | 10.1909 | 24.0588 | -18.0862 | O.2  | 59 | LYS311 | -0.3942 |
| BACKBONE |     |         |         |          |      |    |        |         |
| 976      | CB  | 9.8625  | 22.9503 | -21.2574 | C.3  | 59 | LYS311 | -0.0122 |
| 977      | CG  | 10.0334 | 21.6826 | -22.1478 | C.3  | 59 | LYS311 | -0.0440 |
| 978      | CD  | 11.4413 | 21.5856 | -22.7952 | C.3  | 59 | LYS311 | -0.0124 |
| 979      | CE  | 11.5490 | 20.3714 | -23.7583 | C.3  | 59 | LYS311 | -0.0354 |
| 980      | NZ  | 12.9287 | 20.1845 | -24.2560 | N.4  | 59 | LYS311 | 0.2185  |
| 981      | H   | 9.8777  | 21.5039 | -18.9507 | H    | 59 | LYS311 | 0.1883  |
| 982      | HA  | 11.8824 | 23.1222 | -20.4942 | H    | 59 | LYS311 | 0.0800  |
| 983      | HB3 | 9.9522  | 23.8451 | -21.8939 | H    | 59 | LYS311 | 0.0312  |
| 984      | HB2 | 8.8435  | 22.9395 | -20.8390 | H    | 59 | LYS311 | 0.0312  |
| 985      | HG3 | 9.2691  | 21.7129 | -22.9439 | H    | 59 | LYS311 | 0.0269  |
| 986      | HG2 | 9.8451  | 20.7788 | -21.5431 | H    | 59 | LYS311 | 0.0269  |
| 987      | HD3 | 12.1963 | 21.4343 | -22.0118 | H    | 59 | LYS311 | 0.0317  |
| 988      | HD2 | 11.6717 | 22.5211 | -23.3284 | H    | 59 | LYS311 | 0.0317  |
| 989      | HE3 | 10.8545 | 20.5145 | -24.6060 | H    | 59 | LYS311 | 0.0813  |
| 990      | HE2 | 11.2253 | 19.4666 | -23.2091 | H    | 59 | LYS311 | 0.0813  |
| 991      | HZ3 | 13.2689 | 20.9938 | -24.8835 | H    | 59 | LYS311 | 0.1994  |
| 992      | HZ2 | 13.0435 | 19.2654 | -24.8309 | H    | 59 | LYS311 | 0.1994  |
| 993      | HZ1 | 13.6739 | 20.1459 | -23.4651 | H    | 59 | LYS311 | 0.1994  |
| 994      | N   | 11.0585 | 25.4838 | -19.5610 | N.am | 60 | PRO312 | -0.2498 |
| BACKBONE |     |         |         |          |      |    |        |         |
| 995      | CA  | 10.8711 | 26.5728 | -18.6131 | C.3  | 60 | PRO312 | 0.1338  |
| BACKBONE |     |         |         |          |      |    |        |         |
| 996      | C   | 9.4351  | 26.7637 | -18.1764 | C.2  | 60 | PRO312 | 0.2042  |
| BACKBONE |     |         |         |          |      |    |        |         |
| 997      | O   | 8.5334  | 26.4534 | -18.9376 | O.2  | 60 | PRO312 | -0.3944 |
| BACKBONE |     |         |         |          |      |    |        |         |
| 998      | CB  | 11.3666 | 27.7795 | -19.4476 | C.3  | 60 | PRO312 | -0.0104 |
| 999      | CG  | 12.3647 | 27.1405 | -20.4413 | C.3  | 60 | PRO312 | -0.0281 |
| 1000     | CD  | 11.6625 | 25.8226 | -20.8492 | C.3  | 60 | PRO312 | 0.0369  |
| 1001     | HA  | 11.5334 | 26.3913 | -17.7498 | H    | 60 | PRO312 | 0.0802  |
| 1002     | HB3 | 11.8134 | 28.5752 | -18.8287 | H    | 60 | PRO312 | 0.0313  |
| 1003     | HB2 | 10.5288 | 28.2034 | -20.0279 | H    | 60 | PRO312 | 0.0313  |
| 1004     | HG2 | 12.6008 | 27.7896 | -21.3018 | H    | 60 | PRO312 | 0.0287  |
| 1005     | HG3 | 13.2991 | 26.9106 | -19.9005 | H    | 60 | PRO312 | 0.0287  |
| 1006     | HD2 | 10.8780 | 26.0288 | -21.5936 | H    | 60 | PRO312 | 0.0524  |
| 1007     | HD3 | 12.4079 | 25.1301 | -21.2654 | H    | 60 | PRO312 | 0.0524  |
| 1008     | N   | 9.1953  | 27.2794 | -16.9511 | N.am | 61 | SER313 | -0.2616 |
| BACKBONE |     |         |         |          |      |    |        |         |
| 1009     | CA  | 7.8208  | 27.5334 | -16.5137 | C.3  | 61 | SER313 | 0.1539  |
| BACKBONE |     |         |         |          |      |    |        |         |

|          |        |         |          |       |    |        |         |
|----------|--------|---------|----------|-------|----|--------|---------|
| 1010 C   | 6.9176 | 26.3179 | -16.4605 | C.2   | 61 | SER313 | 0.2062  |
| BACKBONE |        |         |          |       |    |        |         |
| 1011 O   | 5.7262 | 26.5339 | -16.3081 | O.2   | 61 | SER313 | -0.3943 |
| BACKBONE |        |         |          |       |    |        |         |
| 1012 CB  | 7.1822 | 28.6692 | -17.3598 | C.3   | 61 | SER313 | 0.0843  |
| 1013 OG  | 8.0529 | 29.8187 | -17.3400 | O.3   | 61 | SER313 | -0.3903 |
| 1014 H   | 9.9471 | 27.5419 | -16.3415 | H     | 61 | SER313 | 0.1884  |
| 1015 HA  | 7.8426 | 27.9025 | -15.4746 | H     | 61 | SER313 | 0.0823  |
| 1016 HB3 | 6.1967 | 28.9408 | -16.9424 | H     | 61 | SER313 | 0.0606  |
| 1017 HB2 | 7.0309 | 28.3213 | -18.3949 | H     | 61 | SER313 | 0.0606  |
| 1018 HG  | 7.7131 | 30.5463 | -17.8530 | H     | 61 | SER313 | 0.2097  |
| 1019 N   | 7.3845 | 25.0505 | -16.5554 | N.am  | 62 | GLU314 | -0.2636 |
| BACKBONE |        |         |          |       |    |        |         |
| 1020 CA  | 6.4480 | 23.9340 | -16.3831 | C.3   | 62 | GLU314 | 0.1325  |
| BACKBONE |        |         |          |       |    |        |         |
| 1021 C   | 6.1361 | 23.7074 | -14.9169 | C.2   | 62 | GLU314 | 0.2041  |
| BACKBONE |        |         |          |       |    |        |         |
| 1022 O   | 6.9901 | 23.9647 | -14.0823 | O.2   | 62 | GLU314 | -0.3944 |
| BACKBONE |        |         |          |       |    |        |         |
| 1023 CB  | 6.9642 | 22.5884 | -16.9613 | C.3   | 62 | GLU314 | -0.0008 |
| 1024 CG  | 6.9123 | 22.5663 | -18.5077 | C.3   | 62 | GLU314 | 0.0044  |
| 1025 CD  | 7.3128 | 21.2042 | -19.0073 | C.2   | 62 | GLU314 | 0.0350  |
| 1026 OE1 | 8.4625 | 20.7851 | -18.7122 | O.co2 | 62 | GLU314 | -0.5690 |
| 1027 OE2 | 6.4888 | 20.5367 | -19.6858 | O.co2 | 62 | GLU314 | -0.5690 |
| 1028 H   | 8.3576 | 24.8500 | -16.6889 | H     | 62 | GLU314 | 0.1883  |
| 1029 HA  | 5.5016 | 24.1743 | -16.8949 | H     | 62 | GLU314 | 0.0801  |
| 1030 HB3 | 6.3357 | 21.7594 | -16.5956 | H     | 62 | GLU314 | 0.0330  |
| 1031 HB2 | 7.9953 | 22.4158 | -16.6141 | H     | 62 | GLU314 | 0.0330  |
| 1032 HG3 | 7.5911 | 23.3343 | -18.9018 | H     | 62 | GLU314 | 0.0433  |
| 1033 HG2 | 5.8931 | 22.7918 | -18.8574 | H     | 62 | GLU314 | 0.0433  |
| 1034 N   | 4.9189 | 23.2069 | -14.5871 | N.am  | 63 | ASP315 | -0.2622 |
| BACKBONE |        |         |          |       |    |        |         |
| 1035 CA  | 4.5812 | 22.9127 | -13.1932 | C.3   | 63 | ASP315 | 0.1425  |
| BACKBONE |        |         |          |       |    |        |         |
| 1036 C   | 4.7215 | 21.4168 | -12.9408 | C.2   | 63 | ASP315 | 0.2081  |
| BACKBONE |        |         |          |       |    |        |         |
| 1037 O   | 4.1475 | 20.6433 | -13.6971 | O.2   | 63 | ASP315 | -0.3941 |
| BACKBONE |        |         |          |       |    |        |         |
| 1038 CB  | 3.1399 | 23.3567 | -12.8446 | C.3   | 63 | ASP315 | 0.0406  |
| 1039 CG  | 2.8130 | 22.8472 | -11.4664 | C.2   | 63 | ASP315 | 0.0393  |
| 1040 OD1 | 3.0612 | 23.5638 | -10.4626 | O.co2 | 63 | ASP315 | -0.5688 |
| 1041 OD2 | 2.3242 | 21.6925 | -11.3727 | O.co2 | 63 | ASP315 | -0.5688 |
| 1042 H   | 4.2358 | 22.9691 | -15.2807 | H     | 63 | ASP315 | 0.1884  |
| 1043 HA  | 5.1899 | 23.5295 | -12.5182 | H     | 63 | ASP315 | 0.0819  |
| 1044 HB3 | 2.4395 | 22.9307 | -13.5719 | H     | 63 | ASP315 | 0.0478  |
| 1045 HB2 | 3.0401 | 24.4532 | -12.8862 | H     | 63 | ASP315 | 0.0478  |
| 1046 N   | 5.4579 | 20.9277 | -11.9098 | N.am  | 64 | PRO316 | -0.2497 |
| BACKBONE |        |         |          |       |    |        |         |
| 1047 CA  | 5.4415 | 19.4973 | -11.6192 | C.3   | 64 | PRO316 | 0.1338  |
| BACKBONE |        |         |          |       |    |        |         |
| 1048 C   | 4.1126 | 18.8126 | -11.3973 | C.2   | 64 | PRO316 | 0.2042  |
| BACKBONE |        |         |          |       |    |        |         |

|          |         |         |          |       |    |        |         |
|----------|---------|---------|----------|-------|----|--------|---------|
| 1049 O   | 3.9532  | 17.6742 | -11.8166 | O.2   | 64 | PRO316 | -0.3944 |
| BACKBONE |         |         |          |       |    |        |         |
| 1050 CB  | 6.1983  | 19.5111 | -10.2732 | C.3   | 64 | PRO316 | -0.0104 |
| 1051 CG  | 7.1897  | 20.6763 | -10.4346 | C.3   | 64 | PRO316 | -0.0281 |
| 1052 CD  | 6.3139  | 21.7731 | -11.0820 | C.3   | 64 | PRO316 | 0.0369  |
| 1053 HA  | 6.0154  | 18.9752 | -12.3939 | H     | 64 | PRO316 | 0.0802  |
| 1054 HB3 | 6.6688  | 18.5423 | -10.0664 | H     | 64 | PRO316 | 0.0313  |
| 1055 HB2 | 5.5221  | 19.7750 | -9.4457  | H     | 64 | PRO316 | 0.0313  |
| 1056 HG2 | 7.6699  | 20.9855 | -9.4966  | H     | 64 | PRO316 | 0.0287  |
| 1057 HG3 | 7.9656  | 20.3524 | -11.1422 | H     | 64 | PRO316 | 0.0287  |
| 1058 HD2 | 5.7101  | 22.3235 | -10.3402 | H     | 64 | PRO316 | 0.0524  |
| 1059 HD3 | 6.9693  | 22.4617 | -11.6390 | H     | 64 | PRO316 | 0.0524  |
| 1060 N   | 3.1459  | 19.4643 | -10.7195 | N.am  | 65 | TRP317 | -0.2627 |
| BACKBONE |         |         |          |       |    |        |         |
| 1061 CA  | 1.8647  | 18.8051 | -10.4947 | C.3   | 65 | TRP317 | 0.1352  |
| BACKBONE |         |         |          |       |    |        |         |
| 1062 C   | 1.2124  | 18.6120 | -11.8387 | C.2   | 65 | TRP317 | 0.2052  |
| BACKBONE |         |         |          |       |    |        |         |
| 1063 O   | 0.7119  | 17.5305 | -12.1207 | O.2   | 65 | TRP317 | -0.3942 |
| BACKBONE |         |         |          |       |    |        |         |
| 1064 CB  | 0.9048  | 19.6186 | -9.5876  | C.3   | 65 | TRP317 | 0.0042  |
| 1065 CG  | 1.3986  | 19.6463 | -8.1727  | C.2   | 65 | TRP317 | -0.0418 |
| 1066 CD1 | 1.9961  | 20.6455 | -7.4998  | C.2   | 65 | TRP317 | 0.0167  |
| 1067 CD2 | 1.2833  | 18.4815 | -7.2305  | C.ar  | 65 | TRP317 | -0.0214 |
| 1068 NE1 | 2.2260  | 20.2539 | -6.2742  | N.pl3 | 65 | TRP317 | -0.2890 |
| 1069 CE2 | 1.8035  | 18.9914 | -6.0582  | C.ar  | 65 | TRP317 | 0.0603  |
| 1070 CE3 | 0.8095  | 17.1775 | -7.3478  | C.ar  | 65 | TRP317 | -0.0747 |
| 1071 CZ2 | 1.8381  | 18.2231 | -4.8931  | C.ar  | 65 | TRP317 | -0.0443 |
| 1072 CZ3 | 0.9045  | 16.3781 | -6.2022  | C.ar  | 65 | TRP317 | -0.0792 |
| 1073 CH2 | 1.4119  | 16.8924 | -5.0018  | C.ar  | 65 | TRP317 | -0.0768 |
| 1074 H   | 3.2353  | 20.4437 | -10.4888 | H     | 65 | TRP317 | 0.1884  |
| 1075 HA  | 2.0329  | 17.8158 | -10.0419 | H     | 65 | TRP317 | 0.0815  |
| 1076 HB3 | -0.0811 | 19.1304 | -9.5721  | H     | 65 | TRP317 | 0.0397  |
| 1077 HB2 | 0.7626  | 20.6467 | -9.9459  | H     | 65 | TRP317 | 0.0397  |
| 1078 HD1 | 2.2390  | 21.6206 | -7.9324  | H     | 65 | TRP317 | 0.0795  |
| 1079 HE1 | 2.6901  | 20.8351 | -5.5572  | H     | 65 | TRP317 | 0.2216  |
| 1080 HE3 | 0.3973  | 16.8094 | -8.2785  | H     | 65 | TRP317 | 0.0540  |
| 1081 HZ2 | 2.1925  | 18.6383 | -3.9564  | H     | 65 | TRP317 | 0.0541  |
| 1082 HZ3 | 0.5893  | 15.3436 | -6.2486  | H     | 65 | TRP317 | 0.0510  |
| 1083 HH2 | 1.4932  | 16.2278 | -4.1485  | H     | 65 | TRP317 | 0.0530  |
| 1084 N   | 1.2238  | 19.6728 | -12.6762 | N.am  | 66 | GLU318 | -0.2635 |
| BACKBONE |         |         |          |       |    |        |         |
| 1085 CA  | 0.5891  | 19.5461 | -13.9780 | C.3   | 66 | GLU318 | 0.1325  |
| BACKBONE |         |         |          |       |    |        |         |
| 1086 C   | 1.1928  | 18.3775 | -14.7202 | C.2   | 66 | GLU318 | 0.2040  |
| BACKBONE |         |         |          |       |    |        |         |
| 1087 O   | 0.4621  | 17.5373 | -15.2255 | O.2   | 66 | GLU318 | -0.3944 |
| BACKBONE |         |         |          |       |    |        |         |
| 1088 CB  | 0.6655  | 20.8123 | -14.8709 | C.3   | 66 | GLU318 | -0.0008 |
| 1089 CG  | -0.1772 | 21.9845 | -14.2991 | C.3   | 66 | GLU318 | 0.0044  |
| 1090 CD  | -0.0962 | 23.2134 | -15.1619 | C.2   | 66 | GLU318 | 0.0350  |
| 1091 OE1 | 0.6848  | 23.2141 | -16.1513 | O.co2 | 66 | GLU318 | -0.5690 |

|          |      |         |         |          |       |    |        |         |
|----------|------|---------|---------|----------|-------|----|--------|---------|
| 1092     | OE2  | -0.8272 | 24.1889 | -14.8456 | O.co2 | 66 | GLU318 | -0.5690 |
| 1093     | H    | 1.6630  | 20.5460 | -12.4160 | H     | 66 | GLU318 | 0.1883  |
| 1094     | HA   | -0.4612 | 19.3300 | -13.7771 | H     | 66 | GLU318 | 0.0801  |
| 1095     | HB3  | 0.2652  | 20.5690 | -15.8696 | H     | 66 | GLU318 | 0.0330  |
| 1096     | HB2  | 1.7186  | 21.1102 | -14.9915 | H     | 66 | GLU318 | 0.0330  |
| 1097     | HG3  | 0.1602  | 22.2585 | -13.2898 | H     | 66 | GLU318 | 0.0433  |
| 1098     | HG2  | -1.2368 | 21.6918 | -14.2417 | H     | 66 | GLU318 | 0.0433  |
| 1099     | N    | 2.5386  | 18.3006 | -14.7989 | N.am  | 67 | GLN319 | -0.2636 |
| BACKBONE |      |         |         |          |       |    |        |         |
| 1100     | CA   | 3.1348  | 17.2009 | -15.5568 | C.3   | 67 | GLN319 | 0.1330  |
| BACKBONE |      |         |         |          |       |    |        |         |
| 1101     | C    | 2.9199  | 15.8640 | -14.8607 | C.2   | 67 | GLN319 | 0.2044  |
| BACKBONE |      |         |         |          |       |    |        |         |
| 1102     | O    | 2.6575  | 14.8787 | -15.5363 | O.2   | 67 | GLN319 | -0.3944 |
| BACKBONE |      |         |         |          |       |    |        |         |
| 1103     | CB   | 4.6278  | 17.4558 | -15.8966 | C.3   | 67 | GLN319 | 0.0045  |
| 1104     | CG   | 4.8387  | 18.7265 | -16.7700 | C.3   | 67 | GLN319 | 0.0412  |
| 1105     | CD   | 4.0705  | 18.6750 | -18.0713 | C.2   | 67 | GLN319 | 0.1737  |
| 1106     | OE1  | 3.8723  | 17.5984 | -18.6222 | O.2   | 67 | GLN319 | -0.3973 |
| 1107     | NE2  | 3.6137  | 19.8215 | -18.6093 | N.am  | 67 | GLN319 | -0.3009 |
| 1108     | H    | 3.1215  | 18.9809 | -14.3345 | H     | 67 | GLN319 | 0.1883  |
| 1109     | HA   | 2.6091  | 17.1366 | -16.5159 | H     | 67 | GLN319 | 0.0801  |
| 1110     | HB3  | 5.0187  | 16.6008 | -16.4681 | H     | 67 | GLN319 | 0.0337  |
| 1111     | HB2  | 5.1854  | 17.5265 | -14.9506 | H     | 67 | GLN319 | 0.0337  |
| 1112     | HG3  | 5.9030  | 18.8181 | -17.0368 | H     | 67 | GLN319 | 0.0504  |
| 1113     | HG2  | 4.5555  | 19.6229 | -16.1988 | H     | 67 | GLN319 | 0.0504  |
| 1114     | HE21 | 3.7899  | 20.7130 | -18.1886 | H     | 67 | GLN319 | 0.1814  |
| 1115     | HE22 | 3.1101  | 19.7837 | -19.4690 | H     | 67 | GLN319 | 0.1814  |
| 1116     | N    | 3.0080  | 15.7814 | -13.5115 | N.am  | 68 | HIS320 | -0.2587 |
| BACKBONE |      |         |         |          |       |    |        |         |
| 1117     | CA   | 2.7431  | 14.4981 | -12.8390 | C.3   | 68 | HIS320 | 0.1612  |
| BACKBONE |      |         |         |          |       |    |        |         |
| 1118     | C    | 1.3749  | 14.0005 | -13.2535 | C.2   | 68 | HIS320 | 0.2098  |
| BACKBONE |      |         |         |          |       |    |        |         |
| 1119     | O    | 1.2411  | 12.8302 | -13.5744 | O.2   | 68 | HIS320 | -0.3939 |
| BACKBONE |      |         |         |          |       |    |        |         |
| 1120     | CB   | 2.8136  | 14.6202 | -11.2830 | C.3   | 68 | HIS320 | 0.1055  |
| 1121     | CG   | 2.9694  | 13.3759 | -10.4054 | C.2   | 68 | HIS320 | 0.1973  |
| 1122     | ND1  | 3.3158  | 13.4872 | -9.1336  | N.pl3 | 68 | HIS320 | -0.1586 |
| 1123     | CD2  | 2.8018  | 12.0773 | -10.7234 | C.2   | 68 | HIS320 | 0.1263  |
| 1124     | CE1  | 3.3666  | 12.3074 | -8.5910  | C.cat | 68 | HIS320 | 0.1842  |
| 1125     | NE2  | 3.0905  | 11.4542 | -9.4601  | N.2   | 68 | HIS320 | -0.2010 |
| 1126     | H    | 3.2253  | 16.6071 | -12.9733 | H     | 68 | HIS320 | 0.1888  |
| 1127     | HA   | 3.4643  | 13.7561 | -13.2051 | H     | 68 | HIS320 | 0.0867  |
| 1128     | HB3  | 1.9233  | 15.1667 | -10.9335 | H     | 68 | HIS320 | 0.0803  |
| 1129     | HB2  | 3.6785  | 15.2535 | -11.0470 | H     | 68 | HIS320 | 0.0803  |
| 1130     | HD1  | 3.5364  | 14.3564 | -8.6189  | H     | 68 | HIS320 | 0.2700  |
| 1131     | HD2  | 2.5300  | 11.5752 | -11.6503 | H     | 68 | HIS320 | 0.1326  |
| 1132     | HE1  | 3.6020  | 12.0213 | -7.5732  | H     | 68 | HIS320 | 0.1885  |
| 1133     | N    | 0.3527  | 14.8762 | -13.2574 | N.am  | 69 | ALA321 | -0.2636 |
| BACKBONE |      |         |         |          |       |    |        |         |

|          |         |         |          |       |    |        |         |
|----------|---------|---------|----------|-------|----|--------|---------|
| 1134 CA  | -0.9650 | 14.4122 | -13.6863 | C.3   | 69 | ALA321 | 0.1282  |
| BACKBONE |         |         |          |       |    |        |         |
| 1135 C   | -1.0124 | 14.1911 | -15.1820 | C.2   | 69 | ALA321 | 0.2036  |
| BACKBONE |         |         |          |       |    |        |         |
| 1136 O   | -1.4733 | 13.1416 | -15.5912 | O.2   | 69 | ALA321 | -0.3944 |
| BACKBONE |         |         |          |       |    |        |         |
| 1137 CB  | -2.0621 | 15.4335 | -13.3160 | C.3   | 69 | ALA321 | -0.0244 |
| 1138 H   | 0.4756  | 15.8508 | -13.0174 | H     | 69 | ALA321 | 0.1883  |
| 1139 HA  | -1.1888 | 13.4414 | -13.2313 | H     | 69 | ALA321 | 0.0797  |
| 1140 HB3 | -1.8931 | 16.3610 | -13.8767 | H     | 69 | ALA321 | 0.0277  |
| 1141 HB2 | -2.0261 | 15.6782 | -12.2446 | H     | 69 | ALA321 | 0.0277  |
| 1142 HB1 | -3.0641 | 15.0466 | -13.5691 | H     | 69 | ALA321 | 0.0277  |
| 1143 N   | -0.5512 | 15.1467 | -16.0007 | N.am  | 70 | LYS322 | -0.2637 |
| BACKBONE |         |         |          |       |    |        |         |
| 1144 CA  | -0.6684 | 14.9713 | -17.4494 | C.3   | 70 | LYS322 | 0.1310  |
| BACKBONE |         |         |          |       |    |        |         |
| 1145 C   | -0.1298 | 13.6255 | -17.8948 | C.2   | 70 | LYS322 | 0.2040  |
| BACKBONE |         |         |          |       |    |        |         |
| 1146 O   | -0.7120 | 13.0281 | -18.7858 | O.2   | 70 | LYS322 | -0.3944 |
| BACKBONE |         |         |          |       |    |        |         |
| 1147 CB  | 0.1095  | 16.0885 | -18.1828 | C.3   | 70 | LYS322 | -0.0122 |
| 1148 CG  | 0.0344  | 15.9963 | -19.7313 | C.3   | 70 | LYS322 | -0.0440 |
| 1149 CD  | 0.6517  | 17.2768 | -20.3604 | C.3   | 70 | LYS322 | -0.0124 |
| 1150 CE  | 0.7404  | 17.2146 | -21.9098 | C.3   | 70 | LYS322 | -0.0354 |
| 1151 NZ  | 1.8600  | 16.3566 | -22.3729 | N.4   | 70 | LYS322 | 0.2185  |
| 1152 H   | -0.1582 | 15.9951 | -15.6361 | H     | 70 | LYS322 | 0.1883  |
| 1153 HA  | -1.7334 | 15.0224 | -17.7256 | H     | 70 | LYS322 | 0.0800  |
| 1154 HB3 | 1.1669  | 16.0159 | -17.8923 | H     | 70 | LYS322 | 0.0312  |
| 1155 HB2 | -0.2824 | 17.0636 | -17.8511 | H     | 70 | LYS322 | 0.0312  |
| 1156 HG3 | -1.0161 | 15.9017 | -20.0490 | H     | 70 | LYS322 | 0.0269  |
| 1157 HG2 | 0.5755  | 15.0961 | -20.0576 | H     | 70 | LYS322 | 0.0269  |
| 1158 HD3 | 1.6565  | 17.4524 | -19.9475 | H     | 70 | LYS322 | 0.0317  |
| 1159 HD2 | 0.0175  | 18.1328 | -20.0737 | H     | 70 | LYS322 | 0.0317  |
| 1160 HE3 | 0.9010  | 18.2410 | -22.2869 | H     | 70 | LYS322 | 0.0813  |
| 1161 HE2 | -0.2260 | 16.8626 | -22.3118 | H     | 70 | LYS322 | 0.0813  |
| 1162 HZ3 | 2.8150  | 16.6975 | -21.9919 | H     | 70 | LYS322 | 0.1994  |
| 1163 HZ2 | 1.9454  | 16.3514 | -23.4521 | H     | 70 | LYS322 | 0.1994  |
| 1164 HZ1 | 1.7476  | 15.3213 | -22.0855 | H     | 70 | LYS322 | 0.1994  |
| 1165 N   | 0.9783  | 13.1366 | -17.3007 | N.am  | 71 | TRP323 | -0.2627 |
| BACKBONE |         |         |          |       |    |        |         |
| 1166 CA  | 1.5147  | 11.8390 | -17.7209 | C.3   | 71 | TRP323 | 0.1352  |
| BACKBONE |         |         |          |       |    |        |         |
| 1167 C   | 1.0728  | 10.6702 | -16.8649 | C.2   | 71 | TRP323 | 0.2053  |
| BACKBONE |         |         |          |       |    |        |         |
| 1168 O   | 1.0837  | 9.5697  | -17.3920 | O.2   | 71 | TRP323 | -0.3942 |
| BACKBONE |         |         |          |       |    |        |         |
| 1169 CB  | 3.0562  | 11.9217 | -17.7496 | C.3   | 71 | TRP323 | 0.0042  |
| 1170 CG  | 3.4814  | 12.9087 | -18.8062 | C.2   | 71 | TRP323 | -0.0418 |
| 1171 CD1 | 4.0041  | 14.1344 | -18.6235 | C.2   | 71 | TRP323 | 0.0167  |
| 1172 CD2 | 3.4063  | 12.6877 | -20.2937 | C.ar  | 71 | TRP323 | -0.0214 |
| 1173 NE1 | 4.2770  | 14.6696 | -19.7808 | N.pl3 | 71 | TRP323 | -0.2890 |
| 1174 CE2 | 3.9610  | 13.8467 | -20.8014 | C.ar  | 71 | TRP323 | 0.0603  |

|          |     |         |         |          |      |    |        |         |
|----------|-----|---------|---------|----------|------|----|--------|---------|
| 1175     | CE3 | 2.9481  | 11.6619 | -21.1252 | C.ar | 71 | TRP323 | -0.0747 |
| 1176     | CZ2 | 4.1370  | 14.0361 | -22.1728 | C.ar | 71 | TRP323 | -0.0443 |
| 1177     | CZ3 | 3.0999  | 11.8507 | -22.5049 | C.ar | 71 | TRP323 | -0.0792 |
| 1178     | CH2 | 3.6857  | 13.0162 | -23.0204 | C.ar | 71 | TRP323 | -0.0768 |
| 1179     | H   | 1.4425  | 13.6532 | -16.5718 | H    | 71 | TRP323 | 0.1884  |
| 1180     | HA  | 1.1908  | 11.5940 | -18.7458 | H    | 71 | TRP323 | 0.0815  |
| 1181     | HB3 | 3.4921  | 10.9409 | -17.9989 | H    | 71 | TRP323 | 0.0397  |
| 1182     | HB2 | 3.4200  | 12.2170 | -16.7539 | H    | 71 | TRP323 | 0.0397  |
| 1183     | HD1 | 4.1800  | 14.5924 | -17.6495 | H    | 71 | TRP323 | 0.0795  |
| 1184     | HE1 | 4.7401  | 15.5926 | -19.9016 | H    | 71 | TRP323 | 0.2216  |
| 1185     | HE3 | 2.5012  | 10.7616 | -20.7185 | H    | 71 | TRP323 | 0.0540  |
| 1186     | HZ2 | 4.6119  | 14.9307 | -22.5621 | H    | 71 | TRP323 | 0.0541  |
| 1187     | HZ3 | 2.7595  | 11.0750 | -23.1862 | H    | 71 | TRP323 | 0.0510  |
| 1188     | HH2 | 3.7975  | 13.1285 | -24.0959 | H    | 71 | TRP323 | 0.0530  |
| 1189     | N   | 0.7005  | 10.8226 | -15.5749 | N.am | 72 | TYR324 | -0.2620 |
| BACKBONE |     |         |         |          |      |    |        |         |
| 1190     | CA  | 0.3172  | 9.6473  | -14.7819 | C.3  | 72 | TYR324 | 0.1392  |
| BACKBONE |     |         |         |          |      |    |        |         |
| 1191     | C   | -0.9878 | 9.9029  | -14.0534 | C.2  | 72 | TYR324 | 0.2082  |
| BACKBONE |     |         |         |          |      |    |        |         |
| 1192     | O   | -0.9992 | 9.8866  | -12.8311 | O.2  | 72 | TYR324 | -0.3940 |
| BACKBONE |     |         |         |          |      |    |        |         |
| 1193     | CB  | 1.4792  | 9.2916  | -13.8222 | C.3  | 72 | TYR324 | 0.0164  |
| 1194     | CG  | 2.7905  | 9.1399  | -14.6114 | C.ar | 72 | TYR324 | -0.0493 |
| 1195     | CD1 | 3.7261  | 10.1752 | -14.6377 | C.ar | 72 | TYR324 | -0.0685 |
| 1196     | CD2 | 3.0656  | 7.9598  | -15.3171 | C.ar | 72 | TYR324 | -0.0685 |
| 1197     | CE1 | 4.9446  | 10.0105 | -15.3106 | C.ar | 72 | TYR324 | -0.0398 |
| 1198     | CE2 | 4.2725  | 7.8041  | -16.0007 | C.ar | 72 | TYR324 | -0.0398 |
| 1199     | CZ  | 5.2365  | 8.8232  | -15.9811 | C.ar | 72 | TYR324 | 0.0805  |
| 1200     | OH  | 6.4666  | 8.6249  | -16.6203 | O.3  | 72 | TYR324 | -0.3376 |
| 1201     | H   | 0.6987  | 11.7185 | -15.1162 | H    | 72 | TYR324 | 0.1885  |
| 1202     | HA  | 0.1658  | 8.7414  | -15.3872 | H    | 72 | TYR324 | 0.0821  |
| 1203     | HB2 | 1.2686  | 8.3608  | -13.2693 | H    | 72 | TYR324 | 0.0453  |
| 1204     | HB3 | 1.5670  | 10.0959 | -13.0839 | H    | 72 | TYR324 | 0.0453  |
| 1205     | HD1 | 3.5192  | 11.1154 | -14.1369 | H    | 72 | TYR324 | 0.0530  |
| 1206     | HD2 | 2.3339  | 7.1579  | -15.3335 | H    | 72 | TYR324 | 0.0530  |
| 1207     | HE1 | 5.6603  | 10.8191 | -15.2970 | H    | 72 | TYR324 | 0.0525  |
| 1208     | HE2 | 4.4761  | 6.8916  | -16.5507 | H    | 72 | TYR324 | 0.0525  |
| 1209     | HH  | 7.0711  | 9.3630  | -16.5504 | H    | 72 | TYR324 | 0.2458  |
| 1210     | N   | -2.1372 | 10.1330 | -14.7367 | N.am | 73 | PRO325 | -0.2497 |
| BACKBONE |     |         |         |          |      |    |        |         |
| 1211     | CA  | -3.3458 | 10.4883 | -14.0009 | C.3  | 73 | PRO325 | 0.1338  |
| BACKBONE |     |         |         |          |      |    |        |         |
| 1212     | C   | -3.7888 | 9.4199  | -13.0268 | C.2  | 73 | PRO325 | 0.2039  |
| BACKBONE |     |         |         |          |      |    |        |         |
| 1213     | O   | -4.5391 | 9.7377  | -12.1194 | O.2  | 73 | PRO325 | -0.3944 |
| BACKBONE |     |         |         |          |      |    |        |         |
| 1214     | CB  | -4.3507 | 10.6612 | -15.1668 | C.3  | 73 | PRO325 | -0.0104 |
| 1215     | CG  | -3.7523 | 9.8254  | -16.3212 | C.3  | 73 | PRO325 | -0.0281 |
| 1216     | CD  | -2.2275 | 10.0521 | -16.1926 | C.3  | 73 | PRO325 | 0.0369  |
| 1217     | HA  | -3.2052 | 11.4310 | -13.4469 | H    | 73 | PRO325 | 0.0802  |
| 1218     | HB3 | -4.3732 | 11.7132 | -15.4849 | H    | 73 | PRO325 | 0.0313  |

|          |      |         |         |          |      |    |        |         |
|----------|------|---------|---------|----------|------|----|--------|---------|
| 1219     | HB2  | -5.3756 | 10.3537 | -14.9044 | H    | 73 | PRO325 | 0.0313  |
| 1220     | HG2  | -3.9773 | 8.7614  | -16.1379 | H    | 73 | PRO325 | 0.0287  |
| 1221     | HG3  | -4.1508 | 10.1114 | -17.3090 | H    | 73 | PRO325 | 0.0287  |
| 1222     | HD2  | -1.6854 | 9.2211  | -16.6690 | H    | 73 | PRO325 | 0.0524  |
| 1223     | HD3  | -1.9318 | 11.0013 | -16.6631 | H    | 73 | PRO325 | 0.0524  |
| 1224     | N    | -3.3570 | 8.1468  | -13.1507 | N.am | 74 | GLY326 | -0.2664 |
| BACKBONE |      |         |         |          |      |    |        |         |
| 1225     | CA   | -3.7228 | 7.1670  | -12.1287 | C.3  | 74 | GLY326 | 0.1201  |
| BACKBONE |      |         |         |          |      |    |        |         |
| 1226     | C    | -2.8826 | 7.2439  | -10.8697 | C.2  | 74 | GLY326 | 0.2008  |
| BACKBONE |      |         |         |          |      |    |        |         |
| 1227     | O    | -3.1631 | 6.4449  | -9.9834  | O.2  | 74 | GLY326 | -0.3947 |
| BACKBONE |      |         |         |          |      |    |        |         |
| 1228     | H    | -2.7443 | 7.8721  | -13.8930 | H    | 74 | GLY326 | 0.1881  |
| 1229     | HA2  | -3.6123 | 6.1496  | -12.5339 | H    | 74 | GLY326 | 0.0763  |
| 1230     | HA3  | -4.7792 | 7.2906  | -11.8429 | H    | 74 | GLY326 | 0.0763  |
| 1231     | N    | -1.8736 | 8.1513  | -10.7700 | N.am | 75 | CYS327 | -0.2631 |
| BACKBONE |      |         |         |          |      |    |        |         |
| 1232     | CA   | -1.0232 | 8.1916  | -9.5745  | C.3  | 75 | CYS327 | 0.1406  |
| BACKBONE |      |         |         |          |      |    |        |         |
| 1233     | C    | -1.8689 | 8.4546  | -8.3423  | C.2  | 75 | CYS327 | 0.2047  |
| BACKBONE |      |         |         |          |      |    |        |         |
| 1234     | O    | -2.6857 | 9.3630  | -8.3643  | O.2  | 75 | CYS327 | -0.3944 |
| BACKBONE |      |         |         |          |      |    |        |         |
| 1235     | CB   | 0.1566  | 9.2051  | -9.6995  | C.3  | 75 | CYS327 | 0.0443  |
| 1236     | SG   | 1.2255  | 9.1885  | -8.2138  | S.3  | 75 | CYS327 | -0.0882 |
| 1237     | H    | -1.6730 | 8.8137  | -11.5010 | H    | 75 | CYS327 | 0.1884  |
| 1238     | HA   | -0.5796 | 7.1905  | -9.4804  | H    | 75 | CYS327 | 0.0808  |
| 1239     | HB3  | -0.2127 | 10.2283 | -9.8427  | H    | 75 | CYS327 | 0.0432  |
| 1240     | HB2  | 0.7710  | 8.9602  | -10.5771 | H    | 75 | CYS327 | 0.0432  |
| 1241     | LPG2 | 1.0539  | 9.6801  | -7.7781  | LP   | 75 | CYS327 | 0.0000  |
| 1242     | LPG1 | 1.2033  | 8.5879  | -7.8978  | LP   | 75 | CYS327 | 0.0000  |
| 1243     | N    | -1.7285 | 7.6704  | -7.2457  | N.am | 76 | LYS328 | -0.2637 |
| BACKBONE |      |         |         |          |      |    |        |         |
| 1244     | CA   | -2.6026 | 7.8786  | -6.0894  | C.3  | 76 | LYS328 | 0.1310  |
| BACKBONE |      |         |         |          |      |    |        |         |
| 1245     | C    | -2.0831 | 8.9905  | -5.2131  | C.2  | 76 | LYS328 | 0.2040  |
| BACKBONE |      |         |         |          |      |    |        |         |
| 1246     | O    | -2.8871 | 9.8115  | -4.8083  | O.2  | 76 | LYS328 | -0.3944 |
| BACKBONE |      |         |         |          |      |    |        |         |
| 1247     | CB   | -2.9090 | 6.5667  | -5.3189  | C.3  | 76 | LYS328 | -0.0122 |
| 1248     | CG   | -3.6481 | 5.5327  | -6.2223  | C.3  | 76 | LYS328 | -0.0440 |
| 1249     | CD   | -5.0746 | 5.9880  | -6.6627  | C.3  | 76 | LYS328 | -0.0124 |
| 1250     | CE   | -5.8463 | 4.9061  | -7.4669  | C.3  | 76 | LYS328 | -0.0354 |
| 1251     | NZ   | -5.2066 | 4.6537  | -8.7812  | N.4  | 76 | LYS328 | 0.2185  |
| 1252     | H    | -1.0332 | 6.9516  | -7.1918  | H    | 76 | LYS328 | 0.1883  |
| 1253     | HA   | -3.5674 | 8.2631  | -6.4325  | H    | 76 | LYS328 | 0.0800  |
| 1254     | HB3  | -3.5349 | 6.7970  | -4.4404  | H    | 76 | LYS328 | 0.0312  |
| 1255     | HB2  | -1.9613 | 6.1408  | -4.9487  | H    | 76 | LYS328 | 0.0312  |
| 1256     | HG3  | -3.7537 | 4.5906  | -5.6610  | H    | 76 | LYS328 | 0.0269  |
| 1257     | HG2  | -3.0106 | 5.3329  | -7.0967  | H    | 76 | LYS328 | 0.0269  |
| 1258     | HD3  | -5.0393 | 6.8729  | -7.3151  | H    | 76 | LYS328 | 0.0317  |



|          |      |         |         |          |      |    |        |         |
|----------|------|---------|---------|----------|------|----|--------|---------|
| 1259     | HD2  | -5.6546 | 6.2480  | -5.7616  | H    | 76 | LYS328 | 0.0317  |
| 1260     | HE3  | -6.8828 | 5.2582  | -7.6247  | H    | 76 | LYS328 | 0.0813  |
| 1261     | HE2  | -5.8991 | 3.9737  | -6.8771  | H    | 76 | LYS328 | 0.0813  |
| 1262     | HZ3  | -5.0004 | 5.5372  | -9.3750  | H    | 76 | LYS328 | 0.1994  |
| 1263     | HZ2  | -5.7660 | 3.9439  | -9.3751  | H    | 76 | LYS328 | 0.1994  |
| 1264     | HZ1  | -4.2520 | 4.1828  | -8.6482  | H    | 76 | LYS328 | 0.1994  |
| 1265     | N    | -0.7722 | 9.0968  | -4.9233  | N.am | 77 | TYR329 | -0.2621 |
| BACKBONE |      |         |         |          |      |    |        |         |
| 1266     | CA   | -0.2959 | 10.2761 | -4.1885  | C.3  | 77 | TYR329 | 0.1390  |
| BACKBONE |      |         |         |          |      |    |        |         |
| 1267     | C    | -0.8899 | 11.5448 | -4.7753  | C.2  | 77 | TYR329 | 0.2057  |
| BACKBONE |      |         |         |          |      |    |        |         |
| 1268     | O    | -1.3552 | 12.4224 | -4.0629  | O.2  | 77 | TYR329 | -0.3942 |
| BACKBONE |      |         |         |          |      |    |        |         |
| 1269     | CB   | 1.2456  | 10.3590 | -4.3173  | C.3  | 77 | TYR329 | 0.0163  |
| 1270     | CG   | 1.8245  | 11.6180 | -3.6590  | C.ar | 77 | TYR329 | -0.0493 |
| 1271     | CD1  | 1.8930  | 11.6893 | -2.2656  | C.ar | 77 | TYR329 | -0.0685 |
| 1272     | CD2  | 2.2997  | 12.6857 | -4.4305  | C.ar | 77 | TYR329 | -0.0685 |
| 1273     | CE1  | 2.5785  | 12.7421 | -1.6523  | C.ar | 77 | TYR329 | -0.0398 |
| 1274     | CE2  | 2.9806  | 13.7379 | -3.8151  | C.ar | 77 | TYR329 | -0.0398 |
| 1275     | CZ   | 3.1670  | 13.7410 | -2.4289  | C.ar | 77 | TYR329 | 0.0805  |
| 1276     | OH   | 3.9397  | 14.7320 | -1.8280  | O.3  | 77 | TYR329 | -0.3376 |
| 1277     | H    | -0.1307 | 8.3870  | -5.2188  | H    | 77 | TYR329 | 0.1885  |
| 1278     | HA   | -0.5978 | 10.1842 | -3.1314  | H    | 77 | TYR329 | 0.0821  |
| 1279     | HB2  | 1.5521  | 10.3129 | -5.3750  | H    | 77 | TYR329 | 0.0453  |
| 1280     | HB3  | 1.6752  | 9.4909  | -3.8023  | H    | 77 | TYR329 | 0.0453  |
| 1281     | HD1  | 1.4224  | 10.9243 | -1.6544  | H    | 77 | TYR329 | 0.0530  |
| 1282     | HD2  | 2.1453  | 12.6980 | -5.5055  | H    | 77 | TYR329 | 0.0530  |
| 1283     | HE1  | 2.6548  | 12.7813 | -0.5699  | H    | 77 | TYR329 | 0.0525  |
| 1284     | HE2  | 3.3635  | 14.5594 | -4.4092  | H    | 77 | TYR329 | 0.0525  |
| 1285     | HH   | 3.3806  | 15.2522 | -1.2516  | H    | 77 | TYR329 | 0.2458  |
| 1286     | N    | -0.8863 | 11.6406 | -6.1195  | N.am | 78 | LEU330 | -0.2636 |
| BACKBONE |      |         |         |          |      |    |        |         |
| 1287     | CA   | -1.5454 | 12.7637 | -6.7873  | C.3  | 78 | LEU330 | 0.1312  |
| BACKBONE |      |         |         |          |      |    |        |         |
| 1288     | C    | -3.0181 | 12.8218 | -6.4396  | C.2  | 78 | LEU330 | 0.2039  |
| BACKBONE |      |         |         |          |      |    |        |         |
| 1289     | O    | -3.5013 | 13.8776 | -6.0575  | O.2  | 78 | LEU330 | -0.3944 |
| BACKBONE |      |         |         |          |      |    |        |         |
| 1290     | CB   | -1.3617 | 12.5687 | -8.3161  | C.3  | 78 | LEU330 | -0.0101 |
| 1291     | CG   | -2.2194 | 13.4681 | -9.2448  | C.3  | 78 | LEU330 | -0.0425 |
| 1292     | CD1  | -1.7453 | 14.9428 | -9.2007  | C.3  | 78 | LEU330 | -0.0625 |
| 1293     | CD2  | -2.1179 | 12.8905 | -10.6803 | C.3  | 78 | LEU330 | -0.0625 |
| 1294     | H    | -0.4647 | 10.9131 | -6.6657  | H    | 78 | LEU330 | 0.1883  |
| 1295     | HA   | -1.0798 | 13.7024 | -6.4593  | H    | 78 | LEU330 | 0.0800  |
| 1296     | HB3  | -1.6726 | 11.5412 | -8.5340  | H    | 78 | LEU330 | 0.0315  |
| 1297     | HB2  | -0.2920 | 12.6634 | -8.5668  | H    | 78 | LEU330 | 0.0315  |
| 1298     | HG   | -3.2795 | 13.4218 | -8.9480  | H    | 78 | LEU330 | 0.0298  |
| 1299     | HD13 | -1.7522 | 15.3083 | -8.1654  | H    | 78 | LEU330 | 0.0232  |
| 1300     | HD12 | -2.4189 | 15.5775 | -9.7941  | H    | 78 | LEU330 | 0.0232  |
| 1301     | HD11 | -0.7264 | 15.0321 | -9.6071  | H    | 78 | LEU330 | 0.0232  |
| 1302     | HD23 | -1.0601 | 12.8456 | -10.9809 | H    | 78 | LEU330 | 0.0232  |

|          |      |         |         |          |       |    |        |         |
|----------|------|---------|---------|----------|-------|----|--------|---------|
| 1303     | HD22 | -2.6736 | 13.5146 | -11.3862 | H     | 78 | LEU330 | 0.0232  |
| 1304     | HD21 | -2.5418 | 11.8746 | -10.7286 | H     | 78 | LEU330 | 0.0232  |
| 1305     | N    | -3.7564 | 11.6993 | -6.5758  | N.am  | 79 | LEU331 | -0.2637 |
| BACKBONE |      |         |         |          |       |    |        |         |
| 1306     | CA   | -5.1802 | 11.7141 | -6.2290  | C.3   | 79 | LEU331 | 0.1312  |
| BACKBONE |      |         |         |          |       |    |        |         |
| 1307     | C    | -5.3537 | 12.1335 | -4.7844  | C.2   | 79 | LEU331 | 0.2039  |
| BACKBONE |      |         |         |          |       |    |        |         |
| 1308     | O    | -6.2310 | 12.9277 | -4.4853  | O.2   | 79 | LEU331 | -0.3944 |
| BACKBONE |      |         |         |          |       |    |        |         |
| 1309     | CB   | -5.7924 | 10.2941 | -6.4171  | C.3   | 79 | LEU331 | -0.0101 |
| 1310     | CG   | -7.3384 | 10.1965 | -6.2540  | C.3   | 79 | LEU331 | -0.0425 |
| 1311     | CD1  | -8.0845 | 10.8932 | -7.4234  | C.3   | 79 | LEU331 | -0.0625 |
| 1312     | CD2  | -7.7672 | 8.7019  | -6.1919  | C.3   | 79 | LEU331 | -0.0625 |
| 1313     | H    | -3.3287 | 10.8430 | -6.8816  | H     | 79 | LEU331 | 0.1883  |
| 1314     | HA   | -5.6826 | 12.4505 | -6.8721  | H     | 79 | LEU331 | 0.0800  |
| 1315     | HB3  | -5.3366 | 9.6404  | -5.6586  | H     | 79 | LEU331 | 0.0315  |
| 1316     | HB2  | -5.5161 | 9.9107  | -7.4129  | H     | 79 | LEU331 | 0.0315  |
| 1317     | HG   | -7.6374 | 10.6757 | -5.3052  | H     | 79 | LEU331 | 0.0298  |
| 1318     | HD13 | -7.8942 | 11.9746 | -7.4242  | H     | 79 | LEU331 | 0.0232  |
| 1319     | HD12 | -9.1680 | 10.7399 | -7.3178  | H     | 79 | LEU331 | 0.0232  |
| 1320     | HD11 | -7.7678 | 10.4712 | -8.3894  | H     | 79 | LEU331 | 0.0232  |
| 1321     | HD23 | -7.4601 | 8.1743  | -7.1083  | H     | 79 | LEU331 | 0.0232  |
| 1322     | HD22 | -8.8601 | 8.6144  | -6.0888  | H     | 79 | LEU331 | 0.0232  |
| 1323     | HD21 | -7.3058 | 8.2031  | -5.3254  | H     | 79 | LEU331 | 0.0232  |
| 1324     | N    | -4.5160 | 11.5994 | -3.8738  | N.am  | 80 | GLU332 | -0.2636 |
| BACKBONE |      |         |         |          |       |    |        |         |
| 1325     | CA   | -4.6449 | 11.9038 | -2.4515  | C.3   | 80 | GLU332 | 0.1325  |
| BACKBONE |      |         |         |          |       |    |        |         |
| 1326     | C    | -4.3208 | 13.3601 | -2.2024  | C.2   | 80 | GLU332 | 0.2040  |
| BACKBONE |      |         |         |          |       |    |        |         |
| 1327     | O    | -5.0447 | 14.0034 | -1.4592  | O.2   | 80 | GLU332 | -0.3944 |
| BACKBONE |      |         |         |          |       |    |        |         |
| 1328     | CB   | -3.6782 | 11.0084 | -1.6234  | C.3   | 80 | GLU332 | -0.0008 |
| 1329     | CG   | -4.0764 | 9.5054  | -1.6892  | C.3   | 80 | GLU332 | 0.0044  |
| 1330     | CD   | -2.9542 | 8.5809  | -1.3013  | C.2   | 80 | GLU332 | 0.0350  |
| 1331     | OE1  | -1.8900 | 9.0673  | -0.8324  | O.co2 | 80 | GLU332 | -0.5690 |
| 1332     | OE2  | -3.1390 | 7.3473  | -1.4791  | O.co2 | 80 | GLU332 | -0.5690 |
| 1333     | H    | -3.7672 | 11.0063 | -4.1712  | H     | 80 | GLU332 | 0.1883  |
| 1334     | HA   | -5.6792 | 11.7083 | -2.1244  | H     | 80 | GLU332 | 0.0801  |
| 1335     | HB3  | -3.6638 | 11.3255 | -0.5674  | H     | 80 | GLU332 | 0.0330  |
| 1336     | HB2  | -2.6619 | 11.1450 | -2.0245  | H     | 80 | GLU332 | 0.0330  |
| 1337     | HG3  | -4.3723 | 9.2156  | -2.7075  | H     | 80 | GLU332 | 0.0433  |
| 1338     | HG2  | -4.9320 | 9.3133  | -1.0233  | H     | 80 | GLU332 | 0.0433  |
| 1339     | N    | -3.2356 | 13.9112 | -2.7918  | N.am  | 81 | GLN333 | -0.2636 |
| BACKBONE |      |         |         |          |       |    |        |         |
| 1340     | CA   | -2.8899 | 15.3056 | -2.5025  | C.3   | 81 | GLN333 | 0.1330  |
| BACKBONE |      |         |         |          |       |    |        |         |
| 1341     | C    | -3.7177 | 16.2928 | -3.3001  | C.2   | 81 | GLN333 | 0.2040  |
| BACKBONE |      |         |         |          |       |    |        |         |
| 1342     | O    | -4.1443 | 17.2841 | -2.7292  | O.2   | 81 | GLN333 | -0.3944 |
| BACKBONE |      |         |         |          |       |    |        |         |

|          |      |         |         |         |      |    |        |         |
|----------|------|---------|---------|---------|------|----|--------|---------|
| 1343     | CB   | -1.3880 | 15.5881 | -2.7831 | C.3  | 81 | GLN333 | 0.0045  |
| 1344     | CG   | -1.0056 | 17.0694 | -2.4871 | C.3  | 81 | GLN333 | 0.0412  |
| 1345     | CD   | -1.2075 | 17.4804 | -1.0523 | C.2  | 81 | GLN333 | 0.1737  |
| 1346     | OE1  | -1.2044 | 16.6280 | -0.1794 | O.2  | 81 | GLN333 | -0.3973 |
| 1347     | NE2  | -1.3660 | 18.7823 | -0.7504 | N.am | 81 | GLN333 | -0.3009 |
| 1348     | H    | -2.6598 | 13.3725 | -3.4186 | H    | 81 | GLN333 | 0.1883  |
| 1349     | HA   | -3.0702 | 15.4997 | -1.4312 | H    | 81 | GLN333 | 0.0801  |
| 1350     | HB3  | -1.1753 | 15.3664 | -3.8426 | H    | 81 | GLN333 | 0.0337  |
| 1351     | HB2  | -0.7729 | 14.9136 | -2.1653 | H    | 81 | GLN333 | 0.0337  |
| 1352     | HG3  | -1.5560 | 17.7456 | -3.1597 | H    | 81 | GLN333 | 0.0504  |
| 1353     | HG2  | 0.0648  | 17.2212 | -2.6723 | H    | 81 | GLN333 | 0.0504  |
| 1354     | HE21 | -1.3705 | 19.4929 | -1.4530 | H    | 81 | GLN333 | 0.1814  |
| 1355     | HE22 | -1.4939 | 19.0371 | 0.2093  | H    | 81 | GLN333 | 0.1814  |
| 1356     | N    | -3.9343 | 16.0934 | -4.6194 | N.am | 82 | LYS334 | -0.2637 |
| BACKBONE |      |         |         |         |      |    |        |         |
| 1357     | CA   | -4.6623 | 17.0935 | -5.4098 | C.3  | 82 | LYS334 | 0.1310  |
| BACKBONE |      |         |         |         |      |    |        |         |
| 1358     | C    | -6.1195 | 16.7397 | -5.6261 | C.2  | 82 | LYS334 | 0.2037  |
| BACKBONE |      |         |         |         |      |    |        |         |
| 1359     | O    | -6.8648 | 17.6406 | -5.9801 | O.2  | 82 | LYS334 | -0.3944 |
| BACKBONE |      |         |         |         |      |    |        |         |
| 1360     | CB   | -3.9810 | 17.3052 | -6.7894 | C.3  | 82 | LYS334 | -0.0122 |
| 1361     | CG   | -2.4914 | 17.7514 | -6.6949 | C.3  | 82 | LYS334 | -0.0440 |
| 1362     | CD   | -2.2419 | 19.1979 | -6.1709 | C.3  | 82 | LYS334 | -0.0124 |
| 1363     | CE   | -2.7117 | 20.2973 | -7.1696 | C.3  | 82 | LYS334 | -0.0354 |
| 1364     | NZ   | -2.2539 | 21.6542 | -6.7778 | N.4  | 82 | LYS334 | 0.2185  |
| 1365     | H    | -3.6122 | 15.2569 | -5.0752 | H    | 82 | LYS334 | 0.1883  |
| 1366     | HA   | -4.6744 | 18.0725 | -4.9047 | H    | 82 | LYS334 | 0.0800  |
| 1367     | HB3  | -4.5516 | 18.0449 | -7.3679 | H    | 82 | LYS334 | 0.0312  |
| 1368     | HB2  | -4.0385 | 16.3475 | -7.3325 | H    | 82 | LYS334 | 0.0312  |
| 1369     | HG3  | -2.0474 | 17.6871 | -7.7016 | H    | 82 | LYS334 | 0.0269  |
| 1370     | HG2  | -1.9564 | 17.0382 | -6.0463 | H    | 82 | LYS334 | 0.0269  |
| 1371     | HD3  | -1.1545 | 19.3169 | -6.0306 | H    | 82 | LYS334 | 0.0317  |
| 1372     | HD2  | -2.7119 | 19.3409 | -5.1861 | H    | 82 | LYS334 | 0.0317  |
| 1373     | HE3  | -3.8127 | 20.2898 | -7.2489 | H    | 82 | LYS334 | 0.0813  |
| 1374     | HE2  | -2.3004 | 20.0631 | -8.1656 | H    | 82 | LYS334 | 0.0813  |
| 1375     | HZ3  | -2.6274 | 21.9421 | -5.8038 | H    | 82 | LYS334 | 0.1994  |
| 1376     | HZ2  | -2.5878 | 22.4167 | -7.4719 | H    | 82 | LYS334 | 0.1994  |
| 1377     | HZ1  | -1.1741 | 21.7338 | -6.7409 | H    | 82 | LYS334 | 0.1994  |
| 1378     | N    | -6.5781 | 15.4811 | -5.4381 | N.am | 83 | GLY335 | -0.2664 |
| BACKBONE |      |         |         |         |      |    |        |         |
| 1379     | CA   | -7.9936 | 15.1866 | -5.6658 | C.3  | 83 | GLY335 | 0.1201  |
| BACKBONE |      |         |         |         |      |    |        |         |
| 1380     | C    | -8.2880 | 14.8961 | -7.1201 | C.2  | 83 | GLY335 | 0.2007  |
| BACKBONE |      |         |         |         |      |    |        |         |
| 1381     | O    | -7.4766 | 15.1840 | -7.9843 | O.2  | 83 | GLY335 | -0.3947 |
| BACKBONE |      |         |         |         |      |    |        |         |
| 1382     | H    | -5.9809 | 14.7192 | -5.1667 | H    | 83 | GLY335 | 0.1881  |
| 1383     | HA2  | -8.6309 | 16.0263 | -5.3476 | H    | 83 | GLY335 | 0.0763  |
| 1384     | HA3  | -8.2909 | 14.3074 | -5.0715 | H    | 83 | GLY335 | 0.0763  |
| 1385     | N    | -9.4672 | 14.3125 | -7.4302 | N.am | 84 | GLN336 | -0.2638 |
| BACKBONE |      |         |         |         |      |    |        |         |

|          |      |          |         |          |       |    |        |         |
|----------|------|----------|---------|----------|-------|----|--------|---------|
| 1386     | CA   | -9.7576  | 13.9618 | -8.8217  | C.3   | 84 | GLN336 | 0.1330  |
| BACKBONE |      |          |         |          |       |    |        |         |
| 1387     | C    | -10.0347 | 15.1890 | -9.6638  | C.2   | 84 | GLN336 | 0.2040  |
| BACKBONE |      |          |         |          |       |    |        |         |
| 1388     | O    | -9.5605  | 15.2524 | -10.7874 | O.2   | 84 | GLN336 | -0.3944 |
| BACKBONE |      |          |         |          |       |    |        |         |
| 1389     | CB   | -10.9892 | 13.0183 | -8.9116  | C.3   | 84 | GLN336 | 0.0045  |
| 1390     | CG   | -11.1321 | 12.4068 | -10.3297 | C.3   | 84 | GLN336 | 0.0412  |
| 1391     | CD   | -12.4150 | 11.6299 | -10.4800 | C.2   | 84 | GLN336 | 0.1737  |
| 1392     | OE1  | -12.9507 | 11.1620 | -9.4872  | O.2   | 84 | GLN336 | -0.3973 |
| 1393     | NE2  | -12.9450 | 11.4624 | -11.7059 | N.am  | 84 | GLN336 | -0.3009 |
| 1394     | H    | -10.1445 | 14.1086 | -6.7208  | H     | 84 | GLN336 | 0.1883  |
| 1395     | HA   | -8.8846  | 13.4408 | -9.2464  | H     | 84 | GLN336 | 0.0801  |
| 1396     | HB3  | -11.9016 | 13.5844 | -8.6606  | H     | 84 | GLN336 | 0.0337  |
| 1397     | HB2  | -10.8899 | 12.2001 | -8.1822  | H     | 84 | GLN336 | 0.0337  |
| 1398     | HG3  | -10.2917 | 11.7258 | -10.5357 | H     | 84 | GLN336 | 0.0504  |
| 1399     | HG2  | -11.1155 | 13.2151 | -11.0703 | H     | 84 | GLN336 | 0.0504  |
| 1400     | HE21 | -12.5102 | 11.8432 | -12.5260 | H     | 84 | GLN336 | 0.1814  |
| 1401     | HE22 | -13.7973 | 10.9459 | -11.7902 | H     | 84 | GLN336 | 0.1814  |
| 1402     | N    | -10.8128 | 16.1711 | -9.1596  | N.am  | 85 | GLU337 | -0.2636 |
| BACKBONE |      |          |         |          |       |    |        |         |
| 1403     | CA   | -11.1679 | 17.3318 | -9.9865  | C.3   | 85 | GLU337 | 0.1325  |
| BACKBONE |      |          |         |          |       |    |        |         |
| 1404     | C    | -9.9331  | 17.9028 | -10.6576 | C.2   | 85 | GLU337 | 0.2041  |
| BACKBONE |      |          |         |          |       |    |        |         |
| 1405     | O    | -9.9055  | 18.0369 | -11.8726 | O.2   | 85 | GLU337 | -0.3944 |
| BACKBONE |      |          |         |          |       |    |        |         |
| 1406     | CB   | -11.9663 | 18.3497 | -9.1199  | C.3   | 85 | GLU337 | -0.0008 |
| 1407     | CG   | -12.3895 | 19.6247 | -9.8950  | C.3   | 85 | GLU337 | 0.0044  |
| 1408     | CD   | -11.2199 | 20.5430 | -10.1277 | C.2   | 85 | GLU337 | 0.0350  |
| 1409     | OE1  | -10.3898 | 20.7031 | -9.1921  | O.co2 | 85 | GLU337 | -0.5690 |
| 1410     | OE2  | -11.1236 | 21.1125 | -11.2456 | O.co2 | 85 | GLU337 | -0.5690 |
| 1411     | H    | -11.1721 | 16.1007 | -8.2276  | H     | 85 | GLU337 | 0.1883  |
| 1412     | HA   | -11.8331 | 16.9835 | -10.7912 | H     | 85 | GLU337 | 0.0801  |
| 1413     | HB3  | -11.3792 | 18.6337 | -8.2313  | H     | 85 | GLU337 | 0.0330  |
| 1414     | HB2  | -12.8815 | 17.8447 | -8.7648  | H     | 85 | GLU337 | 0.0330  |
| 1415     | HG3  | -13.1268 | 20.1896 | -9.3017  | H     | 85 | GLU337 | 0.0433  |
| 1416     | HG2  | -12.8603 | 19.3442 | -10.8508 | H     | 85 | GLU337 | 0.0433  |
| 1417     | N    | -8.8740  | 18.2004 | -9.8778  | N.am  | 86 | TYR338 | -0.2621 |
| BACKBONE |      |          |         |          |       |    |        |         |
| 1418     | CA   | -7.6208  | 18.6698 | -10.4758 | C.3   | 86 | TYR338 | 0.1390  |
| BACKBONE |      |          |         |          |       |    |        |         |
| 1419     | C    | -7.1635  | 17.7936 | -11.6304 | C.2   | 86 | TYR338 | 0.2057  |
| BACKBONE |      |          |         |          |       |    |        |         |
| 1420     | O    | -6.6637  | 18.2995 | -12.6245 | O.2   | 86 | TYR338 | -0.3942 |
| BACKBONE |      |          |         |          |       |    |        |         |
| 1421     | CB   | -6.5108  | 18.6309 | -9.3904  | C.3   | 86 | TYR338 | 0.0163  |
| 1422     | CG   | -5.1626  | 19.1376 | -9.9251  | C.ar  | 86 | TYR338 | -0.0493 |
| 1423     | CD1  | -4.9311  | 20.5132 | -10.0346 | C.ar  | 86 | TYR338 | -0.0685 |
| 1424     | CD2  | -4.1559  | 18.2409 | -10.2971 | C.ar  | 86 | TYR338 | -0.0685 |
| 1425     | CE1  | -3.6981  | 20.9904 | -10.4849 | C.ar  | 86 | TYR338 | -0.0398 |
| 1426     | CE2  | -2.9098  | 18.7177 | -10.7171 | C.ar  | 86 | TYR338 | -0.0398 |

|          |      |          |         |          |      |    |        |         |
|----------|------|----------|---------|----------|------|----|--------|---------|
| 1427     | CZ   | -2.6784  | 20.0907 | -10.8212 | C.ar | 86 | TYR338 | 0.0805  |
| 1428     | OH   | -1.4335  | 20.5415 | -11.2611 | O.3  | 86 | TYR338 | -0.3376 |
| 1429     | H    | -8.9524  | 18.1176 | -8.8828  | H    | 86 | TYR338 | 0.1885  |
| 1430     | HA   | -7.7651  | 19.7018 | -10.8362 | H    | 86 | TYR338 | 0.0821  |
| 1431     | HB2  | -6.4141  | 17.5975 | -9.0199  | H    | 86 | TYR338 | 0.0453  |
| 1432     | HB3  | -6.8046  | 19.2622 | -8.5366  | H    | 86 | TYR338 | 0.0453  |
| 1433     | HD1  | -5.7126  | 21.2191 | -9.7699  | H    | 86 | TYR338 | 0.0530  |
| 1434     | HD2  | -4.3384  | 17.1717 | -10.2641 | H    | 86 | TYR338 | 0.0530  |
| 1435     | HE1  | -3.5373  | 22.0596 | -10.5712 | H    | 86 | TYR338 | 0.0525  |
| 1436     | HE2  | -2.1155  | 18.0240 | -10.9722 | H    | 86 | TYR338 | 0.0525  |
| 1437     | HH   | -1.4061  | 21.4634 | -11.4941 | H    | 86 | TYR338 | 0.2458  |
| 1438     | N    | -7.3173  | 16.4555 | -11.5216 | N.am | 87 | ILE339 | -0.2633 |
| BACKBONE |      |          |         |          |      |    |        |         |
| 1439     | CA   | -6.8804  | 15.5680 | -12.6027 | C.3  | 87 | ILE339 | 0.1335  |
| BACKBONE |      |          |         |          |      |    |        |         |
| 1440     | C    | -7.8479  | 15.7225 | -13.7567 | C.2  | 87 | ILE339 | 0.2043  |
| BACKBONE |      |          |         |          |      |    |        |         |
| 1441     | O    | -7.4173  | 15.8551 | -14.8954 | O.2  | 87 | ILE339 | -0.3944 |
| BACKBONE |      |          |         |          |      |    |        |         |
| 1442     | CB   | -6.8172  | 14.0703 | -12.1606 | C.3  | 87 | ILE339 | -0.0037 |
| 1443     | CG1  | -5.8985  | 13.8951 | -10.9119 | C.3  | 87 | ILE339 | -0.0491 |
| 1444     | CG2  | -6.3434  | 13.1748 | -13.3430 | C.3  | 87 | ILE339 | -0.0582 |
| 1445     | CD1  | -5.9286  | 12.4597 | -10.3229 | C.3  | 87 | ILE339 | -0.0648 |
| 1446     | H    | -7.8171  | 16.0700 | -10.7422 | H    | 87 | ILE339 | 0.1883  |
| 1447     | HA   | -5.8751  | 15.8740 | -12.9371 | H    | 87 | ILE339 | 0.0803  |
| 1448     | HB   | -7.8341  | 13.7444 | -11.8839 | H    | 87 | ILE339 | 0.0345  |
| 1449     | HG13 | -6.2191  | 14.5709 | -10.1071 | H    | 87 | ILE339 | 0.0267  |
| 1450     | HG12 | -4.8685  | 14.1722 | -11.1714 | H    | 87 | ILE339 | 0.0267  |
| 1451     | HG23 | -6.9994  | 13.2974 | -14.2183 | H    | 87 | ILE339 | 0.0235  |
| 1452     | HG22 | -6.3681  | 12.1096 | -13.0715 | H    | 87 | ILE339 | 0.0235  |
| 1453     | HG21 | -5.3162  | 13.4430 | -13.6334 | H    | 87 | ILE339 | 0.0235  |
| 1454     | HD13 | -6.9659  | 12.1172 | -10.1963 | H    | 87 | ILE339 | 0.0230  |
| 1455     | HD12 | -5.4378  | 12.4376 | -9.3401  | H    | 87 | ILE339 | 0.0230  |
| 1456     | HD11 | -5.3961  | 11.7550 | -10.9731 | H    | 87 | ILE339 | 0.0230  |
| 1457     | N    | -9.1699  | 15.7017 | -13.4665 | N.am | 88 | ASN340 | -0.2616 |
| BACKBONE |      |          |         |          |      |    |        |         |
| 1458     | CA   | -10.1504 | 15.8930 | -14.5324 | C.3  | 88 | ASN340 | 0.1476  |
| BACKBONE |      |          |         |          |      |    |        |         |
| 1459     | C    | -9.8378  | 17.1764 | -15.2685 | C.2  | 88 | ASN340 | 0.2064  |
| BACKBONE |      |          |         |          |      |    |        |         |
| 1460     | O    | -9.8049  | 17.1757 | -16.4889 | O.2  | 88 | ASN340 | -0.3942 |
| BACKBONE |      |          |         |          |      |    |        |         |
| 1461     | CB   | -11.6052 | 16.0458 | -14.0076 | C.3  | 88 | ASN340 | 0.0773  |
| 1462     | CG   | -12.1131 | 14.8412 | -13.2565 | C.2  | 88 | ASN340 | 0.1780  |
| 1463     | OD1  | -11.5710 | 13.7570 | -13.4060 | O.2  | 88 | ASN340 | -0.3970 |
| 1464     | ND2  | -13.1748 | 14.9836 | -12.4377 | N.am | 88 | ASN340 | -0.3007 |
| 1465     | H    | -9.4977  | 15.5758 | -12.5231 | H    | 88 | ASN340 | 0.1885  |
| 1466     | HA   | -10.0931 | 15.0443 | -15.2340 | H    | 88 | ASN340 | 0.0826  |
| 1467     | HB3  | -12.2824 | 16.2089 | -14.8606 | H    | 88 | ASN340 | 0.0551  |
| 1468     | HB2  | -11.6696 | 16.9237 | -13.3487 | H    | 88 | ASN340 | 0.0551  |
| 1469     | HD21 | -13.6420 | 15.8616 | -12.3282 | H    | 88 | ASN340 | 0.1814  |
| 1470     | HD22 | -13.5132 | 14.1882 | -11.9352 | H    | 88 | ASN340 | 0.1814  |

|           |          |         |          |       |    |        |         |
|-----------|----------|---------|----------|-------|----|--------|---------|
| 1471 N    | -9.6104  | 18.2913 | -14.5377 | N.am  | 89 | ASN341 | -0.2615 |
| BACKBONE  |          |         |          |       |    |        |         |
| 1472 CA   | -9.3663  | 19.5602 | -15.2232 | C.3   | 89 | ASN341 | 0.1476  |
| BACKBONE  |          |         |          |       |    |        |         |
| 1473 C    | -8.2174  | 19.4163 | -16.1988 | C.2   | 89 | ASN341 | 0.2063  |
| BACKBONE  |          |         |          |       |    |        |         |
| 1474 O    | -8.2918  | 19.9078 | -17.3139 | O.2   | 89 | ASN341 | -0.3942 |
| BACKBONE  |          |         |          |       |    |        |         |
| 1475 CB   | -9.0517  | 20.6919 | -14.2104 | C.3   | 89 | ASN341 | 0.0773  |
| 1476 CG   | -8.8867  | 21.9933 | -14.9550 | C.2   | 89 | ASN341 | 0.1780  |
| 1477 OD1  | -9.8512  | 22.4401 | -15.5574 | O.2   | 89 | ASN341 | -0.3970 |
| 1478 ND2  | -7.7056  | 22.6404 | -14.9618 | N.am  | 89 | ASN341 | -0.3007 |
| 1479 H    | -9.6137  | 18.2660 | -13.5282 | H     | 89 | ASN341 | 0.1885  |
| 1480 HA   | -10.2776 | 19.8335 | -15.7792 | H     | 89 | ASN341 | 0.0826  |
| 1481 HB3  | -8.1531  | 20.4360 | -13.6271 | H     | 89 | ASN341 | 0.0551  |
| 1482 HB2  | -9.8939  | 20.8047 | -13.5094 | H     | 89 | ASN341 | 0.0551  |
| 1483 HD21 | -6.9020  | 22.2939 | -14.4784 | H     | 89 | ASN341 | 0.1814  |
| 1484 HD22 | -7.6425  | 23.4978 | -15.4729 | H     | 89 | ASN341 | 0.1814  |
| 1485 N    | -7.1230  | 18.7361 | -15.8017 | N.am  | 90 | ILE342 | -0.2633 |
| BACKBONE  |          |         |          |       |    |        |         |
| 1486 CA   | -5.9867  | 18.6043 | -16.7196 | C.3   | 90 | ILE342 | 0.1335  |
| BACKBONE  |          |         |          |       |    |        |         |
| 1487 C    | -6.3185  | 17.7337 | -17.9100 | C.2   | 90 | ILE342 | 0.2043  |
| BACKBONE  |          |         |          |       |    |        |         |
| 1488 O    | -5.7729  | 17.9861 | -18.9733 | O.2   | 90 | ILE342 | -0.3944 |
| BACKBONE  |          |         |          |       |    |        |         |
| 1489 CB   | -4.7259  | 18.1122 | -15.9484 | C.3   | 90 | ILE342 | -0.0037 |
| 1490 CG1  | -4.2774  | 19.3016 | -15.0459 | C.3   | 90 | ILE342 | -0.0491 |
| 1491 CG2  | -3.5989  | 17.6213 | -16.9077 | C.3   | 90 | ILE342 | -0.0582 |
| 1492 CD1  | -3.2476  | 18.8794 | -13.9844 | C.3   | 90 | ILE342 | -0.0648 |
| 1493 H    | -7.0949  | 18.2988 | -14.8955 | H     | 90 | ILE342 | 0.1883  |
| 1494 HA   | -5.7590  | 19.5975 | -17.1474 | H     | 90 | ILE342 | 0.0803  |
| 1495 HB   | -5.0113  | 17.2510 | -15.3185 | H     | 90 | ILE342 | 0.0345  |
| 1496 HG13 | -5.1397  | 19.7255 | -14.5034 | H     | 90 | ILE342 | 0.0267  |
| 1497 HG12 | -3.8392  | 20.1009 | -15.6688 | H     | 90 | ILE342 | 0.0267  |
| 1498 HG23 | -3.9566  | 16.7945 | -17.5390 | H     | 90 | ILE342 | 0.0235  |
| 1499 HG22 | -2.7361  | 17.2320 | -16.3523 | H     | 90 | ILE342 | 0.0235  |
| 1500 HG21 | -3.2604  | 18.4422 | -17.5579 | H     | 90 | ILE342 | 0.0235  |
| 1501 HD13 | -3.6618  | 18.1059 | -13.3197 | H     | 90 | ILE342 | 0.0230  |
| 1502 HD12 | -2.9518  | 19.7561 | -13.3934 | H     | 90 | ILE342 | 0.0230  |
| 1503 HD11 | -2.3693  | 18.4950 | -14.5046 | H     | 90 | ILE342 | 0.0230  |
| 1504 N    | -7.2009  | 16.7185 | -17.7912 | N.am  | 91 | HIS343 | -0.2619 |
| BACKBONE  |          |         |          |       |    |        |         |
| 1505 CA   | -7.5644  | 15.9257 | -18.9694 | C.3   | 91 | HIS343 | 0.1421  |
| BACKBONE  |          |         |          |       |    |        |         |
| 1506 C    | -8.8785  | 16.4347 | -19.5152 | C.2   | 91 | HIS343 | 0.2060  |
| BACKBONE  |          |         |          |       |    |        |         |
| 1507 O    | -9.6445  | 15.6528 | -20.0491 | O.2   | 91 | HIS343 | -0.3942 |
| BACKBONE  |          |         |          |       |    |        |         |
| 1508 CB   | -7.5907  | 14.4127 | -18.6130 | C.3   | 91 | HIS343 | 0.0427  |
| 1509 CG   | -6.2026  | 13.9732 | -18.2194 | C.2   | 91 | HIS343 | 0.0561  |
| 1510 ND1  | -5.6043  | 14.3354 | -17.1160 | N.pl3 | 91 | HIS343 | -0.2623 |

|          |      |          |         |          |      |    |        |         |
|----------|------|----------|---------|----------|------|----|--------|---------|
| 1511     | CD2  | -5.3976  | 13.1616 | -18.9393 | C.2  | 91 | HIS343 | -0.0276 |
| 1512     | CE1  | -4.4231  | 13.8195 | -17.0796 | C.2  | 91 | HIS343 | 0.0875  |
| 1513     | NE2  | -4.2251  | 13.1106 | -18.1036 | N.2  | 91 | HIS343 | -0.3437 |
| 1514     | H    | -7.6936  | 16.5636 | -16.9255 | H    | 91 | HIS343 | 0.1885  |
| 1515     | HA   | -6.8387  | 16.0300 | -19.7909 | H    | 91 | HIS343 | 0.0824  |
| 1516     | HB3  | -7.9405  | 13.8364 | -19.4964 | H    | 91 | HIS343 | 0.0491  |
| 1517     | HB2  | -8.3117  | 14.2411 | -17.7889 | H    | 91 | HIS343 | 0.0491  |
| 1518     | HD1  | -5.9991  | 14.9284 | -16.3732 | H    | 91 | HIS343 | 0.2386  |
| 1519     | HD2  | -5.6007  | 12.6838 | -19.9061 | H    | 91 | HIS343 | 0.0324  |
| 1520     | HE1  | -3.7034  | 13.9718 | -16.2754 | H    | 91 | HIS343 | 0.1149  |
| 1521     | N    | -9.1736  | 17.7475 | -19.4055 | N.am | 92 | LEU344 | -0.2636 |
| BACKBONE |      |          |         |          |      |    |        |         |
| 1522     | CA   | -10.4586 | 18.2511 | -19.8963 | C.3  | 92 | LEU344 | 0.1312  |
| BACKBONE |      |          |         |          |      |    |        |         |
| 1523     | C    | -10.4716 | 18.3435 | -21.4063 | C.2  | 92 | LEU344 | 0.2040  |
| BACKBONE |      |          |         |          |      |    |        |         |
| 1524     | O    | -11.5068 | 18.0870 | -21.9997 | O.2  | 92 | LEU344 | -0.3944 |
| BACKBONE |      |          |         |          |      |    |        |         |
| 1525     | CB   | -10.7489 | 19.6215 | -19.2152 | C.3  | 92 | LEU344 | -0.0101 |
| 1526     | CG   | -12.1147 | 20.2752 | -19.5852 | C.3  | 92 | LEU344 | -0.0425 |
| 1527     | CD1  | -12.6339 | 21.1258 | -18.3913 | C.3  | 92 | LEU344 | -0.0625 |
| 1528     | CD2  | -12.0022 | 21.1832 | -20.8430 | C.3  | 92 | LEU344 | -0.0625 |
| 1529     | H    | -8.5378  | 18.3939 | -18.9767 | H    | 92 | LEU344 | 0.1883  |
| 1530     | HA   | -11.2546 | 17.5450 | -19.5969 | H    | 92 | LEU344 | 0.0800  |
| 1531     | HB3  | -9.9341  | 20.3332 | -19.4240 | H    | 92 | LEU344 | 0.0315  |
| 1532     | HB2  | -10.7371 | 19.4065 | -18.1358 | H    | 92 | LEU344 | 0.0315  |
| 1533     | HG   | -12.8547 | 19.4791 | -19.7787 | H    | 92 | LEU344 | 0.0298  |
| 1534     | HD13 | -12.8048 | 20.4928 | -17.5069 | H    | 92 | LEU344 | 0.0232  |
| 1535     | HD12 | -13.5869 | 21.6102 | -18.6491 | H    | 92 | LEU344 | 0.0232  |
| 1536     | HD11 | -11.9033 | 21.9046 | -18.1249 | H    | 92 | LEU344 | 0.0232  |
| 1537     | HD23 | -11.3151 | 22.0210 | -20.6513 | H    | 92 | LEU344 | 0.0232  |
| 1538     | HD22 | -12.9895 | 21.5973 | -21.0962 | H    | 92 | LEU344 | 0.0232  |
| 1539     | HD21 | -11.6344 | 20.6341 | -21.7187 | H    | 92 | LEU344 | 0.0232  |
| 1540     | N    | -9.3523  | 18.7080 | -22.0688 | N.am | 93 | THR345 | -0.2613 |
| BACKBONE |      |          |         |          |      |    |        |         |
| 1541     | CA   | -9.3884  | 18.8729 | -23.5263 | C.3  | 93 | THR345 | 0.1564  |
| BACKBONE |      |          |         |          |      |    |        |         |
| 1542     | C    | -9.4040  | 17.5635 | -24.2907 | C.2  | 93 | THR345 | 0.2044  |
| BACKBONE |      |          |         |          |      |    |        |         |
| 1543     | O    | -9.5365  | 17.6338 | -25.5021 | O.2  | 93 | THR345 | -0.3944 |
| BACKBONE |      |          |         |          |      |    |        |         |
| 1544     | CB   | -8.2015  | 19.7804 | -23.9655 | C.3  | 93 | THR345 | 0.0924  |
| 1545     | OG1  | -8.1730  | 20.8949 | -23.0513 | O.3  | 93 | THR345 | -0.3874 |
| 1546     | CG2  | -8.3267  | 20.3223 | -25.4172 | C.3  | 93 | THR345 | -0.0346 |
| 1547     | H    | -8.5003  | 18.9025 | -21.5789 | H    | 93 | THR345 | 0.1884  |
| 1548     | HA   | -10.3135 | 19.4086 | -23.7913 | H    | 93 | THR345 | 0.0826  |
| 1549     | HB   | -7.2671  | 19.1986 | -23.8722 | H    | 93 | THR345 | 0.0639  |
| 1550     | HG1  | -7.4421  | 21.4873 | -23.1965 | H    | 93 | THR345 | 0.2101  |
| 1551     | HG22 | -7.5320  | 21.0586 | -25.6156 | H    | 93 | THR345 | 0.0257  |
| 1552     | HG21 | -9.3000  | 20.8186 | -25.5589 | H    | 93 | THR345 | 0.0257  |
| 1553     | HG23 | -8.2211  | 19.5181 | -26.1595 | H    | 93 | THR345 | 0.0257  |

|          |         |         |          |       |    |        |         |
|----------|---------|---------|----------|-------|----|--------|---------|
| 1554 N   | -9.2815 | 16.3674 | -23.6651 | N.am  | 94 | HIS346 | -0.2881 |
| BACKBONE |         |         |          |       |    |        |         |
| 1555 CA  | -9.2849 | 15.1234 | -24.4394 | C.3   | 94 | HIS346 | 0.0164  |
| BACKBONE |         |         |          |       |    |        |         |
| 1556 C   | -9.9333 | 14.0078 | -23.6656 | C.2   | 94 | HIS346 | -0.1856 |
| BACKBONE |         |         |          |       |    |        |         |
| 1557 O   | -9.8916 | 12.8616 | -24.0849 | O.2   | 94 | HIS346 | -0.7200 |
| BACKBONE |         |         |          |       |    |        |         |
| 1558 CB  | -7.8341 | 14.7541 | -24.8449 | C.3   | 94 | HIS346 | 0.0174  |
| 1559 CG  | -6.8790 | 14.7660 | -23.6745 | C.2   | 94 | HIS346 | 0.0535  |
| 1560 ND1 | -5.7104 | 15.3700 | -23.6979 | N.p13 | 94 | HIS346 | -0.2624 |
| 1561 CD2 | -7.0565 | 14.1789 | -22.4726 | C.2   | 94 | HIS346 | -0.0277 |
| 1562 CE1 | -5.1083 | 15.2153 | -22.5600 | C.2   | 94 | HIS346 | 0.0875  |
| 1563 NE2 | -5.8346 | 14.5325 | -21.8005 | N.2   | 94 | HIS346 | -0.3437 |
| 1564 H   | -9.1721 | 16.2842 | -22.6730 | H     | 94 | HIS346 | 0.1855  |
| 1565 HA  | -9.9087 | 15.2212 | -25.3453 | H     | 94 | HIS346 | 0.0497  |
| 1566 HB3 | -7.5119 | 15.4965 | -25.5920 | H     | 94 | HIS346 | 0.0464  |
| 1567 HB2 | -7.8118 | 13.7609 | -25.3242 | H     | 94 | HIS346 | 0.0464  |
| 1568 HD1 | -5.3265 | 15.8905 | -24.4956 | H     | 94 | HIS346 | 0.2386  |
| 1569 HD2 | -7.8907 | 13.5890 | -22.0961 | H     | 94 | HIS346 | 0.0324  |
| 1570 HE1 | -4.1224 | 15.6092 | -22.2961 | H     | 94 | HIS346 | 0.1149  |

@<TRIPOS>BOND

|    |    |    |    |                     |
|----|----|----|----|---------------------|
| 1  | 1  | 2  | 1  | BACKBONE            |
| 2  | 1  | 7  | 1  |                     |
| 3  | 1  | 12 | 1  |                     |
| 4  | 2  | 3  | 1  | BACKBONE            |
| 5  | 2  | 5  | 1  |                     |
| 6  | 2  | 8  | 1  |                     |
| 7  | 3  | 4  | 2  | BACKBONE            |
| 8  | 3  | 13 | am | BACKBONE   INTERRES |
| 9  | 5  | 6  | 1  |                     |
| 10 | 5  | 9  | 1  |                     |
| 11 | 5  | 10 | 1  |                     |
| 12 | 6  | 11 | 1  |                     |
| 13 | 13 | 14 | 1  | BACKBONE            |
| 14 | 13 | 23 | 1  |                     |
| 15 | 14 | 15 | 1  | BACKBONE            |
| 16 | 14 | 17 | 1  |                     |
| 17 | 14 | 24 | 1  |                     |
| 18 | 15 | 16 | 2  | BACKBONE            |
| 19 | 15 | 30 | am | BACKBONE   INTERRES |
| 20 | 17 | 18 | 1  |                     |
| 21 | 17 | 25 | 1  |                     |
| 22 | 17 | 26 | 1  |                     |
| 23 | 18 | 19 | 1  |                     |
| 24 | 18 | 20 | 2  |                     |
| 25 | 19 | 21 | 1  |                     |
| 26 | 19 | 27 | 1  |                     |
| 27 | 20 | 22 | 1  |                     |
| 28 | 20 | 28 | 1  |                     |
| 29 | 21 | 22 | 2  |                     |
| 30 | 21 | 29 | 1  |                     |



|    |    |    |    |                     |
|----|----|----|----|---------------------|
| 31 | 30 | 31 | 1  | BACKBONE            |
| 32 | 30 | 38 | 1  |                     |
| 33 | 31 | 32 | 1  | BACKBONE            |
| 34 | 31 | 34 | 1  |                     |
| 35 | 31 | 39 | 1  |                     |
| 36 | 32 | 33 | 2  | BACKBONE            |
| 37 | 32 | 49 | am | BACKBONE   INTERRES |
| 38 | 34 | 35 | 1  |                     |
| 39 | 34 | 40 | 1  |                     |
| 40 | 34 | 41 | 1  |                     |
| 41 | 35 | 36 | 1  |                     |
| 42 | 35 | 42 | 1  |                     |
| 43 | 35 | 43 | 1  |                     |
| 44 | 36 | 37 | 1  |                     |
| 45 | 36 | 44 | 1  |                     |
| 46 | 36 | 45 | 1  |                     |
| 47 | 37 | 46 | 1  |                     |
| 48 | 37 | 47 | 1  |                     |
| 49 | 37 | 48 | 1  |                     |
| 50 | 49 | 50 | 1  | BACKBONE            |
| 51 | 49 | 57 | 1  |                     |
| 52 | 50 | 51 | 1  | BACKBONE            |
| 53 | 50 | 53 | 1  |                     |
| 54 | 50 | 58 | 1  |                     |
| 55 | 51 | 52 | 2  | BACKBONE            |
| 56 | 51 | 68 | am | BACKBONE   INTERRES |
| 57 | 53 | 54 | 1  |                     |
| 58 | 53 | 59 | 1  |                     |
| 59 | 53 | 60 | 1  |                     |
| 60 | 54 | 55 | 1  |                     |
| 61 | 54 | 56 | 1  |                     |
| 62 | 54 | 61 | 1  |                     |
| 63 | 55 | 62 | 1  |                     |
| 64 | 55 | 63 | 1  |                     |
| 65 | 55 | 64 | 1  |                     |
| 66 | 56 | 65 | 1  |                     |
| 67 | 56 | 66 | 1  |                     |
| 68 | 56 | 67 | 1  |                     |
| 69 | 68 | 69 | 1  | BACKBONE            |
| 70 | 68 | 74 | 1  |                     |
| 71 | 69 | 70 | 1  | BACKBONE            |
| 72 | 69 | 72 | 1  |                     |
| 73 | 69 | 75 | 1  |                     |
| 74 | 70 | 71 | 2  | BACKBONE            |
| 75 | 70 | 82 | am | BACKBONE   INTERRES |
| 76 | 72 | 73 | 1  |                     |
| 77 | 72 | 76 | 1  |                     |
| 78 | 72 | 77 | 1  |                     |
| 79 | 73 | 74 | 1  |                     |
| 80 | 73 | 78 | 1  |                     |
| 81 | 73 | 79 | 1  |                     |
| 82 | 74 | 80 | 1  |                     |

|     |     |     |    |                     |
|-----|-----|-----|----|---------------------|
| 83  | 74  | 81  | 1  |                     |
| 84  | 82  | 83  | 1  | BACKBONE            |
| 85  | 82  | 93  | 1  |                     |
| 86  | 83  | 84  | 1  | BACKBONE            |
| 87  | 83  | 86  | 1  |                     |
| 88  | 83  | 94  | 1  |                     |
| 89  | 84  | 85  | 2  | BACKBONE            |
| 90  | 84  | 106 | am | BACKBONE   INTERRES |
| 91  | 86  | 87  | 1  |                     |
| 92  | 86  | 95  | 1  |                     |
| 93  | 86  | 96  | 1  |                     |
| 94  | 87  | 88  | 1  |                     |
| 95  | 87  | 97  | 1  |                     |
| 96  | 87  | 98  | 1  |                     |
| 97  | 88  | 89  | 1  |                     |
| 98  | 88  | 99  | 1  |                     |
| 99  | 88  | 100 | 1  |                     |
| 100 | 89  | 90  | ar |                     |
| 101 | 89  | 101 | 1  |                     |
| 102 | 90  | 91  | ar |                     |
| 103 | 90  | 92  | ar |                     |
| 104 | 91  | 102 | 1  |                     |
| 105 | 91  | 103 | 1  |                     |
| 106 | 92  | 104 | 1  |                     |
| 107 | 92  | 105 | 1  |                     |
| 108 | 106 | 107 | 1  | BACKBONE            |
| 109 | 106 | 114 | 1  |                     |
| 110 | 107 | 108 | 1  | BACKBONE            |
| 111 | 107 | 110 | 1  |                     |
| 112 | 107 | 115 | 1  |                     |
| 113 | 108 | 109 | 2  | BACKBONE            |
| 114 | 108 | 120 | am | BACKBONE   INTERRES |
| 115 | 110 | 111 | 1  |                     |
| 116 | 110 | 116 | 1  |                     |
| 117 | 110 | 117 | 1  |                     |
| 118 | 111 | 112 | 2  |                     |
| 119 | 111 | 113 | am |                     |
| 120 | 113 | 118 | 1  |                     |
| 121 | 113 | 119 | 1  |                     |
| 122 | 120 | 121 | 1  | BACKBONE            |
| 123 | 120 | 126 | 1  |                     |
| 124 | 121 | 122 | 1  | BACKBONE            |
| 125 | 121 | 124 | 1  |                     |
| 126 | 121 | 127 | 1  |                     |
| 127 | 122 | 123 | 2  | BACKBONE            |
| 128 | 122 | 134 | am | BACKBONE   INTERRES |
| 129 | 124 | 125 | 1  |                     |
| 130 | 124 | 128 | 1  |                     |
| 131 | 124 | 129 | 1  |                     |
| 132 | 125 | 126 | 1  |                     |
| 133 | 125 | 130 | 1  |                     |
| 134 | 125 | 131 | 1  |                     |

|     |     |     |    |                     |
|-----|-----|-----|----|---------------------|
| 135 | 126 | 132 | 1  |                     |
| 136 | 126 | 133 | 1  |                     |
| 137 | 134 | 135 | 1  | BACKBONE            |
| 138 | 134 | 140 | 1  |                     |
| 139 | 135 | 136 | 1  | BACKBONE            |
| 140 | 135 | 138 | 1  |                     |
| 141 | 135 | 141 | 1  |                     |
| 142 | 136 | 137 | 2  | BACKBONE            |
| 143 | 136 | 145 | am | BACKBONE   INTERRES |
| 144 | 138 | 139 | 1  |                     |
| 145 | 138 | 142 | 1  |                     |
| 146 | 138 | 143 | 1  |                     |
| 147 | 139 | 144 | 1  |                     |
| 148 | 145 | 146 | 1  | BACKBONE            |
| 149 | 145 | 153 | 1  |                     |
| 150 | 146 | 147 | 1  | BACKBONE            |
| 151 | 146 | 149 | 1  |                     |
| 152 | 146 | 154 | 1  |                     |
| 153 | 147 | 148 | 2  | BACKBONE            |
| 154 | 147 | 164 | am | BACKBONE   INTERRES |
| 155 | 149 | 150 | 1  |                     |
| 156 | 149 | 155 | 1  |                     |
| 157 | 149 | 156 | 1  |                     |
| 158 | 150 | 151 | 1  |                     |
| 159 | 150 | 157 | 1  |                     |
| 160 | 150 | 158 | 1  |                     |
| 161 | 151 | 152 | 1  |                     |
| 162 | 151 | 159 | 1  |                     |
| 163 | 151 | 160 | 1  |                     |
| 164 | 152 | 161 | 1  |                     |
| 165 | 152 | 162 | 1  |                     |
| 166 | 152 | 163 | 1  |                     |
| 167 | 164 | 165 | 1  | BACKBONE            |
| 168 | 164 | 169 | 1  |                     |
| 169 | 165 | 166 | 1  | BACKBONE            |
| 170 | 165 | 168 | 1  |                     |
| 171 | 165 | 170 | 1  |                     |
| 172 | 166 | 167 | 2  | BACKBONE            |
| 173 | 166 | 174 | am | BACKBONE   INTERRES |
| 174 | 168 | 171 | 1  |                     |
| 175 | 168 | 172 | 1  |                     |
| 176 | 168 | 173 | 1  |                     |
| 177 | 174 | 175 | 1  | BACKBONE            |
| 178 | 174 | 182 | 1  |                     |
| 179 | 175 | 176 | 1  | BACKBONE            |
| 180 | 175 | 178 | 1  |                     |
| 181 | 175 | 183 | 1  |                     |
| 182 | 176 | 177 | 2  | BACKBONE            |
| 183 | 176 | 186 | am | BACKBONE   INTERRES |
| 184 | 178 | 179 | 1  |                     |
| 185 | 178 | 184 | 1  |                     |
| 186 | 178 | 185 | 1  |                     |

|     |     |     |    |                     |
|-----|-----|-----|----|---------------------|
| 187 | 179 | 180 | ar |                     |
| 188 | 179 | 181 | ar |                     |
| 189 | 186 | 187 | 1  | BACKBONE            |
| 190 | 186 | 198 | 1  |                     |
| 191 | 187 | 188 | 1  | BACKBONE            |
| 192 | 187 | 190 | 1  |                     |
| 193 | 187 | 199 | 1  |                     |
| 194 | 188 | 189 | 2  | BACKBONE            |
| 195 | 188 | 207 | am | BACKBONE   INTERRES |
| 196 | 190 | 191 | 1  |                     |
| 197 | 190 | 200 | 1  |                     |
| 198 | 190 | 201 | 1  |                     |
| 199 | 191 | 192 | ar |                     |
| 200 | 191 | 193 | ar |                     |
| 201 | 192 | 194 | ar |                     |
| 202 | 192 | 202 | 1  |                     |
| 203 | 193 | 195 | ar |                     |
| 204 | 193 | 203 | 1  |                     |
| 205 | 194 | 196 | ar |                     |
| 206 | 194 | 204 | 1  |                     |
| 207 | 195 | 196 | ar |                     |
| 208 | 195 | 205 | 1  |                     |
| 209 | 196 | 197 | 1  |                     |
| 210 | 197 | 206 | 1  |                     |
| 211 | 207 | 208 | 1  | BACKBONE            |
| 212 | 207 | 216 | 1  |                     |
| 213 | 208 | 209 | 1  | BACKBONE            |
| 214 | 208 | 211 | 1  |                     |
| 215 | 208 | 217 | 1  |                     |
| 216 | 209 | 210 | 2  | BACKBONE            |
| 217 | 209 | 222 | am | BACKBONE   INTERRES |
| 218 | 211 | 212 | 1  |                     |
| 219 | 211 | 218 | 1  |                     |
| 220 | 211 | 219 | 1  |                     |
| 221 | 212 | 213 | 1  |                     |
| 222 | 212 | 220 | 1  |                     |
| 223 | 212 | 221 | 1  |                     |
| 224 | 213 | 214 | ar |                     |
| 225 | 213 | 215 | ar |                     |
| 226 | 222 | 223 | 1  | BACKBONE            |
| 227 | 222 | 227 | 1  |                     |
| 228 | 223 | 224 | 1  | BACKBONE            |
| 229 | 223 | 226 | 1  |                     |
| 230 | 223 | 228 | 1  |                     |
| 231 | 224 | 225 | 2  | BACKBONE            |
| 232 | 224 | 232 | am | BACKBONE   INTERRES |
| 233 | 226 | 229 | 1  |                     |
| 234 | 226 | 230 | 1  |                     |
| 235 | 226 | 231 | 1  |                     |
| 236 | 232 | 233 | 1  | BACKBONE            |
| 237 | 232 | 243 | 1  |                     |
| 238 | 233 | 234 | 1  | BACKBONE            |

|     |     |     |    |                     |
|-----|-----|-----|----|---------------------|
| 239 | 233 | 236 | 1  |                     |
| 240 | 233 | 244 | 1  |                     |
| 241 | 234 | 235 | 2  | BACKBONE            |
| 242 | 234 | 256 | am | BACKBONE   INTERRES |
| 243 | 236 | 237 | 1  |                     |
| 244 | 236 | 245 | 1  |                     |
| 245 | 236 | 246 | 1  |                     |
| 246 | 237 | 238 | 1  |                     |
| 247 | 237 | 247 | 1  |                     |
| 248 | 237 | 248 | 1  |                     |
| 249 | 238 | 239 | 1  |                     |
| 250 | 238 | 249 | 1  |                     |
| 251 | 238 | 250 | 1  |                     |
| 252 | 239 | 240 | ar |                     |
| 253 | 239 | 251 | 1  |                     |
| 254 | 240 | 241 | ar |                     |
| 255 | 240 | 242 | ar |                     |
| 256 | 241 | 252 | 1  |                     |
| 257 | 241 | 253 | 1  |                     |
| 258 | 242 | 254 | 1  |                     |
| 259 | 242 | 255 | 1  |                     |
| 260 | 256 | 257 | 1  | BACKBONE            |
| 261 | 256 | 264 | 1  |                     |
| 262 | 257 | 258 | 1  | BACKBONE            |
| 263 | 257 | 260 | 1  |                     |
| 264 | 257 | 265 | 1  |                     |
| 265 | 258 | 259 | 2  | BACKBONE            |
| 266 | 258 | 275 | am | BACKBONE   INTERRES |
| 267 | 260 | 261 | 1  |                     |
| 268 | 260 | 262 | 1  |                     |
| 269 | 260 | 266 | 1  |                     |
| 270 | 261 | 263 | 1  |                     |
| 271 | 261 | 267 | 1  |                     |
| 272 | 261 | 268 | 1  |                     |
| 273 | 262 | 269 | 1  |                     |
| 274 | 262 | 270 | 1  |                     |
| 275 | 262 | 271 | 1  |                     |
| 276 | 263 | 272 | 1  |                     |
| 277 | 263 | 273 | 1  |                     |
| 278 | 263 | 274 | 1  |                     |
| 279 | 275 | 276 | 1  | BACKBONE            |
| 280 | 275 | 286 | 1  |                     |
| 281 | 276 | 277 | 1  | BACKBONE            |
| 282 | 276 | 279 | 1  |                     |
| 283 | 276 | 287 | 1  |                     |
| 284 | 277 | 278 | 2  | BACKBONE            |
| 285 | 277 | 295 | am | BACKBONE   INTERRES |
| 286 | 279 | 280 | 1  |                     |
| 287 | 279 | 288 | 1  |                     |
| 288 | 279 | 289 | 1  |                     |
| 289 | 280 | 281 | ar |                     |
| 290 | 280 | 282 | ar |                     |

|     |     |     |    |                     |
|-----|-----|-----|----|---------------------|
| 291 | 281 | 283 | ar |                     |
| 292 | 281 | 290 | 1  |                     |
| 293 | 282 | 284 | ar |                     |
| 294 | 282 | 291 | 1  |                     |
| 295 | 283 | 285 | ar |                     |
| 296 | 283 | 292 | 1  |                     |
| 297 | 284 | 285 | ar |                     |
| 298 | 284 | 293 | 1  |                     |
| 299 | 285 | 294 | 1  |                     |
| 300 | 295 | 296 | 1  | BACKBONE            |
| 301 | 295 | 302 | 1  |                     |
| 302 | 296 | 297 | 1  | BACKBONE            |
| 303 | 296 | 299 | 1  |                     |
| 304 | 296 | 303 | 1  |                     |
| 305 | 297 | 298 | 2  | BACKBONE            |
| 306 | 297 | 309 | am | BACKBONE   INTERRES |
| 307 | 299 | 300 | 1  |                     |
| 308 | 299 | 301 | 1  |                     |
| 309 | 299 | 304 | 1  |                     |
| 310 | 300 | 305 | 1  |                     |
| 311 | 301 | 306 | 1  |                     |
| 312 | 301 | 307 | 1  |                     |
| 313 | 301 | 308 | 1  |                     |
| 314 | 309 | 310 | 1  | BACKBONE            |
| 315 | 309 | 320 | 1  |                     |
| 316 | 310 | 311 | 1  | BACKBONE            |
| 317 | 310 | 313 | 1  |                     |
| 318 | 310 | 321 | 1  |                     |
| 319 | 311 | 312 | 2  | BACKBONE            |
| 320 | 311 | 329 | am | BACKBONE   INTERRES |
| 321 | 313 | 314 | 1  |                     |
| 322 | 313 | 322 | 1  |                     |
| 323 | 313 | 323 | 1  |                     |
| 324 | 314 | 315 | ar |                     |
| 325 | 314 | 316 | ar |                     |
| 326 | 315 | 317 | ar |                     |
| 327 | 315 | 324 | 1  |                     |
| 328 | 316 | 318 | ar |                     |
| 329 | 316 | 325 | 1  |                     |
| 330 | 317 | 319 | ar |                     |
| 331 | 317 | 326 | 1  |                     |
| 332 | 318 | 319 | ar |                     |
| 333 | 318 | 327 | 1  |                     |
| 334 | 319 | 328 | 1  |                     |
| 335 | 329 | 330 | 1  | BACKBONE            |
| 336 | 329 | 333 | 1  |                     |
| 337 | 330 | 331 | 1  | BACKBONE            |
| 338 | 330 | 334 | 1  |                     |
| 339 | 330 | 335 | 1  |                     |
| 340 | 331 | 332 | 2  | BACKBONE            |
| 341 | 331 | 336 | am | BACKBONE   INTERRES |
| 342 | 336 | 337 | 1  | BACKBONE            |

|     |     |     |    |                     |
|-----|-----|-----|----|---------------------|
| 343 | 336 | 343 | 1  |                     |
| 344 | 337 | 338 | 1  | BACKBONE            |
| 345 | 337 | 340 | 1  |                     |
| 346 | 337 | 344 | 1  |                     |
| 347 | 338 | 339 | 2  | BACKBONE            |
| 348 | 338 | 350 | am | BACKBONE   INTERRES |
| 349 | 340 | 341 | 1  |                     |
| 350 | 340 | 342 | 1  |                     |
| 351 | 340 | 345 | 1  |                     |
| 352 | 341 | 346 | 1  |                     |
| 353 | 342 | 347 | 1  |                     |
| 354 | 342 | 348 | 1  |                     |
| 355 | 342 | 349 | 1  |                     |
| 356 | 350 | 351 | 1  | BACKBONE            |
| 357 | 350 | 364 | 1  |                     |
| 358 | 351 | 352 | 1  | BACKBONE            |
| 359 | 351 | 354 | 1  |                     |
| 360 | 351 | 365 | 1  |                     |
| 361 | 352 | 353 | 2  | BACKBONE            |
| 362 | 352 | 374 | am | BACKBONE   INTERRES |
| 363 | 354 | 355 | 1  |                     |
| 364 | 354 | 366 | 1  |                     |
| 365 | 354 | 367 | 1  |                     |
| 366 | 355 | 356 | 2  |                     |
| 367 | 355 | 357 | 1  |                     |
| 368 | 356 | 358 | 1  |                     |
| 369 | 356 | 368 | 1  |                     |
| 370 | 357 | 359 | ar |                     |
| 371 | 357 | 360 | ar |                     |
| 372 | 358 | 359 | 1  |                     |
| 373 | 358 | 369 | 1  |                     |
| 374 | 359 | 361 | ar |                     |
| 375 | 360 | 362 | ar |                     |
| 376 | 360 | 370 | 1  |                     |
| 377 | 361 | 363 | ar |                     |
| 378 | 361 | 371 | 1  |                     |
| 379 | 362 | 363 | ar |                     |
| 380 | 362 | 372 | 1  |                     |
| 381 | 363 | 373 | 1  |                     |
| 382 | 374 | 375 | 1  | BACKBONE            |
| 383 | 374 | 382 | 1  |                     |
| 384 | 375 | 376 | 1  | BACKBONE            |
| 385 | 375 | 378 | 1  |                     |
| 386 | 375 | 383 | 1  |                     |
| 387 | 376 | 377 | 2  | BACKBONE            |
| 388 | 376 | 393 | am | BACKBONE   INTERRES |
| 389 | 378 | 379 | 1  |                     |
| 390 | 378 | 380 | 1  |                     |
| 391 | 378 | 384 | 1  |                     |
| 392 | 379 | 381 | 1  |                     |
| 393 | 379 | 385 | 1  |                     |
| 394 | 379 | 386 | 1  |                     |

|     |     |     |    |                     |
|-----|-----|-----|----|---------------------|
| 395 | 380 | 387 | 1  |                     |
| 396 | 380 | 388 | 1  |                     |
| 397 | 380 | 389 | 1  |                     |
| 398 | 381 | 390 | 1  |                     |
| 399 | 381 | 391 | 1  |                     |
| 400 | 381 | 392 | 1  |                     |
| 401 | 393 | 394 | 1  | BACKBONE            |
| 402 | 393 | 405 | 1  |                     |
| 403 | 394 | 395 | 1  | BACKBONE            |
| 404 | 394 | 397 | 1  |                     |
| 405 | 394 | 406 | 1  |                     |
| 406 | 395 | 396 | 2  | BACKBONE            |
| 407 | 395 | 414 | am | BACKBONE   INTERRES |
| 408 | 397 | 398 | 1  |                     |
| 409 | 397 | 407 | 1  |                     |
| 410 | 397 | 408 | 1  |                     |
| 411 | 398 | 399 | ar |                     |
| 412 | 398 | 400 | ar |                     |
| 413 | 399 | 401 | ar |                     |
| 414 | 399 | 409 | 1  |                     |
| 415 | 400 | 402 | ar |                     |
| 416 | 400 | 410 | 1  |                     |
| 417 | 401 | 403 | ar |                     |
| 418 | 401 | 411 | 1  |                     |
| 419 | 402 | 403 | ar |                     |
| 420 | 402 | 412 | 1  |                     |
| 421 | 403 | 404 | 1  |                     |
| 422 | 404 | 413 | 1  |                     |
| 423 | 414 | 415 | 1  | BACKBONE            |
| 424 | 414 | 420 | 1  |                     |
| 425 | 415 | 416 | 1  | BACKBONE            |
| 426 | 415 | 418 | 1  |                     |
| 427 | 415 | 421 | 1  |                     |
| 428 | 416 | 417 | 2  | BACKBONE            |
| 429 | 416 | 425 | am | BACKBONE   INTERRES |
| 430 | 418 | 419 | 1  |                     |
| 431 | 418 | 422 | 1  |                     |
| 432 | 418 | 423 | 1  |                     |
| 433 | 419 | 424 | 1  |                     |
| 434 | 425 | 426 | 1  | BACKBONE            |
| 435 | 425 | 432 | 1  |                     |
| 436 | 426 | 427 | 1  | BACKBONE            |
| 437 | 426 | 429 | 1  |                     |
| 438 | 426 | 433 | 1  |                     |
| 439 | 427 | 428 | 2  | BACKBONE            |
| 440 | 427 | 441 | am | BACKBONE   INTERRES |
| 441 | 429 | 430 | 1  |                     |
| 442 | 429 | 431 | 1  |                     |
| 443 | 429 | 434 | 1  |                     |
| 444 | 430 | 435 | 1  |                     |
| 445 | 430 | 436 | 1  |                     |
| 446 | 430 | 437 | 1  |                     |



|     |     |     |    |                     |
|-----|-----|-----|----|---------------------|
| 447 | 431 | 438 | 1  |                     |
| 448 | 431 | 439 | 1  |                     |
| 449 | 431 | 440 | 1  |                     |
| 450 | 441 | 442 | 1  | BACKBONE            |
| 451 | 441 | 449 | 1  |                     |
| 452 | 442 | 443 | 1  | BACKBONE            |
| 453 | 442 | 445 | 1  |                     |
| 454 | 442 | 450 | 1  |                     |
| 455 | 443 | 444 | 2  | BACKBONE            |
| 456 | 443 | 455 | am | BACKBONE   INTERRES |
| 457 | 445 | 446 | 1  |                     |
| 458 | 445 | 451 | 1  |                     |
| 459 | 445 | 452 | 1  |                     |
| 460 | 446 | 447 | 2  |                     |
| 461 | 446 | 448 | am |                     |
| 462 | 448 | 453 | 1  |                     |
| 463 | 448 | 454 | 1  |                     |
| 464 | 455 | 456 | 1  | BACKBONE            |
| 465 | 455 | 464 | 1  |                     |
| 466 | 456 | 457 | 1  | BACKBONE            |
| 467 | 456 | 459 | 1  |                     |
| 468 | 456 | 465 | 1  |                     |
| 469 | 457 | 458 | 2  | BACKBONE            |
| 470 | 457 | 477 | am | BACKBONE   INTERRES |
| 471 | 459 | 460 | 1  |                     |
| 472 | 459 | 466 | 1  |                     |
| 473 | 459 | 467 | 1  |                     |
| 474 | 460 | 461 | 1  |                     |
| 475 | 460 | 468 | 1  |                     |
| 476 | 460 | 469 | 1  |                     |
| 477 | 461 | 462 | 1  |                     |
| 478 | 461 | 470 | 1  |                     |
| 479 | 461 | 471 | 1  |                     |
| 480 | 462 | 463 | 1  |                     |
| 481 | 462 | 472 | 1  |                     |
| 482 | 462 | 473 | 1  |                     |
| 483 | 463 | 474 | 1  |                     |
| 484 | 463 | 475 | 1  |                     |
| 485 | 463 | 476 | 1  |                     |
| 486 | 477 | 478 | 1  | BACKBONE            |
| 487 | 477 | 486 | 1  |                     |
| 488 | 478 | 479 | 1  | BACKBONE            |
| 489 | 478 | 481 | 1  |                     |
| 490 | 478 | 487 | 1  |                     |
| 491 | 479 | 480 | 2  | BACKBONE            |
| 492 | 479 | 492 | am | BACKBONE   INTERRES |
| 493 | 481 | 482 | 1  |                     |
| 494 | 481 | 488 | 1  |                     |
| 495 | 481 | 489 | 1  |                     |
| 496 | 482 | 483 | 1  |                     |
| 497 | 482 | 490 | 1  |                     |
| 498 | 482 | 491 | 1  |                     |

|     |     |     |    |                     |
|-----|-----|-----|----|---------------------|
| 499 | 483 | 484 | ar |                     |
| 500 | 483 | 485 | ar |                     |
| 501 | 492 | 493 | 1  | BACKBONE            |
| 502 | 492 | 501 | 1  |                     |
| 503 | 493 | 494 | 1  | BACKBONE            |
| 504 | 493 | 496 | 1  |                     |
| 505 | 493 | 502 | 1  |                     |
| 506 | 494 | 495 | 2  | BACKBONE            |
| 507 | 494 | 509 | am | BACKBONE   INTERRES |
| 508 | 496 | 497 | 1  |                     |
| 509 | 496 | 503 | 1  |                     |
| 510 | 496 | 504 | 1  |                     |
| 511 | 497 | 498 | 1  |                     |
| 512 | 497 | 505 | 1  |                     |
| 513 | 497 | 506 | 1  |                     |
| 514 | 498 | 499 | 2  |                     |
| 515 | 498 | 500 | am |                     |
| 516 | 500 | 507 | 1  |                     |
| 517 | 500 | 508 | 1  |                     |
| 518 | 509 | 510 | 1  | BACKBONE            |
| 519 | 509 | 517 | 1  |                     |
| 520 | 510 | 511 | 1  | BACKBONE            |
| 521 | 510 | 513 | 1  |                     |
| 522 | 510 | 518 | 1  |                     |
| 523 | 511 | 512 | 2  | BACKBONE            |
| 524 | 511 | 528 | am | BACKBONE   INTERRES |
| 525 | 513 | 514 | 1  |                     |
| 526 | 513 | 519 | 1  |                     |
| 527 | 513 | 520 | 1  |                     |
| 528 | 514 | 515 | 1  |                     |
| 529 | 514 | 516 | 1  |                     |
| 530 | 514 | 521 | 1  |                     |
| 531 | 515 | 522 | 1  |                     |
| 532 | 515 | 523 | 1  |                     |
| 533 | 515 | 524 | 1  |                     |
| 534 | 516 | 525 | 1  |                     |
| 535 | 516 | 526 | 1  |                     |
| 536 | 516 | 527 | 1  |                     |
| 537 | 528 | 529 | 1  | BACKBONE            |
| 538 | 528 | 533 | 1  |                     |
| 539 | 529 | 530 | 1  | BACKBONE            |
| 540 | 529 | 532 | 1  |                     |
| 541 | 529 | 534 | 1  |                     |
| 542 | 530 | 531 | 2  | BACKBONE            |
| 543 | 530 | 538 | am | BACKBONE   INTERRES |
| 544 | 532 | 535 | 1  |                     |
| 545 | 532 | 536 | 1  |                     |
| 546 | 532 | 537 | 1  |                     |
| 547 | 538 | 539 | 1  | BACKBONE            |
| 548 | 538 | 549 | 1  |                     |
| 549 | 539 | 540 | 1  | BACKBONE            |
| 550 | 539 | 542 | 1  |                     |

|     |     |     |    |                     |
|-----|-----|-----|----|---------------------|
| 551 | 539 | 550 | 1  |                     |
| 552 | 540 | 541 | 2  | BACKBONE            |
| 553 | 540 | 562 | am | BACKBONE   INTERRES |
| 554 | 542 | 543 | 1  |                     |
| 555 | 542 | 551 | 1  |                     |
| 556 | 542 | 552 | 1  |                     |
| 557 | 543 | 544 | 1  |                     |
| 558 | 543 | 553 | 1  |                     |
| 559 | 543 | 554 | 1  |                     |
| 560 | 544 | 545 | 1  |                     |
| 561 | 544 | 555 | 1  |                     |
| 562 | 544 | 556 | 1  |                     |
| 563 | 545 | 546 | ar |                     |
| 564 | 545 | 557 | 1  |                     |
| 565 | 546 | 547 | ar |                     |
| 566 | 546 | 548 | ar |                     |
| 567 | 547 | 558 | 1  |                     |
| 568 | 547 | 559 | 1  |                     |
| 569 | 548 | 560 | 1  |                     |
| 570 | 548 | 561 | 1  |                     |
| 571 | 562 | 563 | 1  | BACKBONE            |
| 572 | 562 | 567 | 1  |                     |
| 573 | 563 | 564 | 1  | BACKBONE            |
| 574 | 563 | 566 | 1  |                     |
| 575 | 563 | 568 | 1  |                     |
| 576 | 564 | 565 | 2  | BACKBONE            |
| 577 | 564 | 572 | am | BACKBONE   INTERRES |
| 578 | 566 | 569 | 1  |                     |
| 579 | 566 | 570 | 1  |                     |
| 580 | 566 | 571 | 1  |                     |
| 581 | 572 | 573 | 1  | BACKBONE            |
| 582 | 572 | 576 | 1  |                     |
| 583 | 573 | 574 | 1  | BACKBONE            |
| 584 | 573 | 577 | 1  |                     |
| 585 | 573 | 578 | 1  |                     |
| 586 | 574 | 575 | 2  | BACKBONE            |
| 587 | 574 | 579 | am | BACKBONE   INTERRES |
| 588 | 579 | 580 | 1  | BACKBONE            |
| 589 | 579 | 590 | 1  |                     |
| 590 | 580 | 581 | 1  | BACKBONE            |
| 591 | 580 | 583 | 1  |                     |
| 592 | 580 | 591 | 1  |                     |
| 593 | 581 | 582 | 2  | BACKBONE            |
| 594 | 581 | 599 | am | BACKBONE   INTERRES |
| 595 | 583 | 584 | 1  |                     |
| 596 | 583 | 592 | 1  |                     |
| 597 | 583 | 593 | 1  |                     |
| 598 | 584 | 585 | ar |                     |
| 599 | 584 | 586 | ar |                     |
| 600 | 585 | 587 | ar |                     |
| 601 | 585 | 594 | 1  |                     |
| 602 | 586 | 588 | ar |                     |

|     |     |     |    |                     |
|-----|-----|-----|----|---------------------|
| 603 | 586 | 595 | 1  |                     |
| 604 | 587 | 589 | ar |                     |
| 605 | 587 | 596 | 1  |                     |
| 606 | 588 | 589 | ar |                     |
| 607 | 588 | 597 | 1  |                     |
| 608 | 589 | 598 | 1  |                     |
| 609 | 599 | 600 | 1  | BACKBONE            |
| 610 | 599 | 611 | 1  |                     |
| 611 | 600 | 601 | 1  | BACKBONE            |
| 612 | 600 | 603 | 1  |                     |
| 613 | 600 | 612 | 1  |                     |
| 614 | 601 | 602 | 2  | BACKBONE            |
| 615 | 601 | 620 | am | BACKBONE   INTERRES |
| 616 | 603 | 604 | 1  |                     |
| 617 | 603 | 613 | 1  |                     |
| 618 | 603 | 614 | 1  |                     |
| 619 | 604 | 605 | ar |                     |
| 620 | 604 | 606 | ar |                     |
| 621 | 605 | 607 | ar |                     |
| 622 | 605 | 615 | 1  |                     |
| 623 | 606 | 608 | ar |                     |
| 624 | 606 | 616 | 1  |                     |
| 625 | 607 | 609 | ar |                     |
| 626 | 607 | 617 | 1  |                     |
| 627 | 608 | 609 | ar |                     |
| 628 | 608 | 618 | 1  |                     |
| 629 | 609 | 610 | 1  |                     |
| 630 | 610 | 619 | 1  |                     |
| 631 | 620 | 621 | 1  | BACKBONE            |
| 632 | 620 | 625 | 1  |                     |
| 633 | 621 | 622 | 1  | BACKBONE            |
| 634 | 621 | 624 | 1  |                     |
| 635 | 621 | 626 | 1  |                     |
| 636 | 622 | 623 | 2  | BACKBONE            |
| 637 | 622 | 630 | am | BACKBONE   INTERRES |
| 638 | 624 | 627 | 1  |                     |
| 639 | 624 | 628 | 1  |                     |
| 640 | 624 | 629 | 1  |                     |
| 641 | 630 | 631 | 1  | BACKBONE            |
| 642 | 630 | 638 | 1  |                     |
| 643 | 631 | 632 | 1  | BACKBONE            |
| 644 | 631 | 634 | 1  |                     |
| 645 | 631 | 639 | 1  |                     |
| 646 | 632 | 633 | 2  | BACKBONE            |
| 647 | 632 | 649 | am | BACKBONE   INTERRES |
| 648 | 634 | 635 | 1  |                     |
| 649 | 634 | 640 | 1  |                     |
| 650 | 634 | 641 | 1  |                     |
| 651 | 635 | 636 | 1  |                     |
| 652 | 635 | 637 | 1  |                     |
| 653 | 635 | 642 | 1  |                     |
| 654 | 636 | 643 | 1  |                     |

|     |     |     |    |                     |
|-----|-----|-----|----|---------------------|
| 655 | 636 | 644 | 1  |                     |
| 656 | 636 | 645 | 1  |                     |
| 657 | 637 | 646 | 1  |                     |
| 658 | 637 | 647 | 1  |                     |
| 659 | 637 | 648 | 1  |                     |
| 660 | 649 | 650 | 1  | BACKBONE            |
| 661 | 649 | 653 | 1  |                     |
| 662 | 650 | 651 | 1  | BACKBONE            |
| 663 | 650 | 654 | 1  |                     |
| 664 | 650 | 655 | 1  |                     |
| 665 | 651 | 652 | 2  | BACKBONE            |
| 666 | 651 | 656 | am | BACKBONE   INTERRES |
| 667 | 656 | 657 | 1  | BACKBONE            |
| 668 | 656 | 665 | 1  |                     |
| 669 | 657 | 658 | 1  | BACKBONE            |
| 670 | 657 | 660 | 1  |                     |
| 671 | 657 | 666 | 1  |                     |
| 672 | 658 | 659 | 2  | BACKBONE            |
| 673 | 658 | 671 | am | BACKBONE   INTERRES |
| 674 | 660 | 661 | 1  |                     |
| 675 | 660 | 667 | 1  |                     |
| 676 | 660 | 668 | 1  |                     |
| 677 | 661 | 662 | 1  |                     |
| 678 | 661 | 669 | 1  |                     |
| 679 | 661 | 670 | 1  |                     |
| 680 | 662 | 663 | ar |                     |
| 681 | 662 | 664 | ar |                     |
| 682 | 671 | 672 | 1  | BACKBONE            |
| 683 | 671 | 675 | 1  |                     |
| 684 | 672 | 673 | 1  | BACKBONE            |
| 685 | 672 | 676 | 1  |                     |
| 686 | 672 | 677 | 1  |                     |
| 687 | 673 | 674 | 2  | BACKBONE            |
| 688 | 673 | 678 | am | BACKBONE   INTERRES |
| 689 | 678 | 679 | 1  | BACKBONE            |
| 690 | 678 | 686 | 1  |                     |
| 691 | 679 | 680 | 1  | BACKBONE            |
| 692 | 679 | 682 | 1  |                     |
| 693 | 679 | 687 | 1  |                     |
| 694 | 680 | 681 | 2  | BACKBONE            |
| 695 | 680 | 765 | am | BACKBONE   INTERRES |
| 696 | 682 | 683 | 1  |                     |
| 697 | 682 | 688 | 1  |                     |
| 698 | 682 | 689 | 1  |                     |
| 699 | 683 | 684 | ar |                     |
| 700 | 683 | 685 | ar |                     |
| 701 | 690 | 691 | 2  | BACKBONE            |
| 702 | 691 | 692 | am | BACKBONE            |
| 703 | 691 | 730 | 1  | BACKBONE            |
| 704 | 692 | 693 | 1  | BACKBONE            |
| 705 | 692 | 727 | 1  | BACKBONE            |
| 706 | 693 | 694 | 1  |                     |

|     |     |     |    |          |
|-----|-----|-----|----|----------|
| 707 | 693 | 695 | 1  | BACKBONE |
| 708 | 693 | 721 | 1  | BACKBONE |
| 709 | 695 | 696 | am | BACKBONE |
| 710 | 695 | 720 | 2  | BACKBONE |
| 711 | 696 | 697 | 1  |          |
| 712 | 696 | 698 | 1  | BACKBONE |
| 713 | 698 | 699 | 1  |          |
| 714 | 698 | 700 | 1  | BACKBONE |
| 715 | 698 | 705 | 1  | BACKBONE |
| 716 | 700 | 701 | ar | BACKBONE |
| 717 | 700 | 713 | ar | BACKBONE |
| 718 | 701 | 702 | 1  | BACKBONE |
| 719 | 701 | 708 | ar | BACKBONE |
| 720 | 702 | 703 | 1  |          |
| 721 | 702 | 704 | 1  |          |
| 722 | 702 | 705 | 1  | BACKBONE |
| 723 | 705 | 706 | 1  |          |
| 724 | 705 | 707 | 1  |          |
| 725 | 708 | 709 | ar | BACKBONE |
| 726 | 708 | 715 | 1  | BACKBONE |
| 727 | 709 | 710 | 1  |          |
| 728 | 709 | 711 | ar | BACKBONE |
| 729 | 711 | 712 | 1  |          |
| 730 | 711 | 713 | ar | BACKBONE |
| 731 | 713 | 714 | 1  |          |
| 732 | 715 | 716 | 1  |          |
| 733 | 716 | 717 | 2  |          |
| 734 | 716 | 718 | 2  |          |
| 735 | 716 | 719 | am |          |
| 736 | 719 | 772 | 1  |          |
| 737 | 721 | 722 | 1  |          |
| 738 | 721 | 723 | 1  |          |
| 739 | 721 | 724 | 1  | BACKBONE |
| 740 | 724 | 725 | 1  |          |
| 741 | 724 | 726 | 1  |          |
| 742 | 724 | 727 | 1  | BACKBONE |
| 743 | 727 | 728 | 1  |          |
| 744 | 727 | 729 | 1  |          |
| 745 | 730 | 731 | 1  |          |
| 746 | 730 | 732 | 1  | BACKBONE |
| 747 | 730 | 748 | 1  | BACKBONE |
| 748 | 732 | 733 | 1  |          |
| 749 | 732 | 734 | am | BACKBONE |
| 750 | 734 | 735 | 1  | BACKBONE |
| 751 | 734 | 747 | 2  | BACKBONE |
| 752 | 735 | 736 | 1  |          |
| 753 | 735 | 737 | 1  | BACKBONE |
| 754 | 735 | 743 | 1  | BACKBONE |
| 755 | 737 | 738 | 1  |          |
| 756 | 737 | 739 | 1  | BACKBONE |
| 757 | 739 | 740 | 1  |          |
| 758 | 739 | 741 | 1  |          |

|     |     |     |    |                     |
|-----|-----|-----|----|---------------------|
| 759 | 739 | 742 | 1  |                     |
| 760 | 743 | 744 | 1  |                     |
| 761 | 743 | 745 | 1  |                     |
| 762 | 743 | 746 | 1  |                     |
| 763 | 748 | 749 | 1  |                     |
| 764 | 748 | 750 | 1  | BACKBONE            |
| 765 | 748 | 762 | 1  | BACKBONE            |
| 766 | 750 | 751 | 1  |                     |
| 767 | 750 | 752 | 1  |                     |
| 768 | 750 | 753 | 1  | BACKBONE            |
| 769 | 753 | 754 | 1  |                     |
| 770 | 753 | 755 | 1  |                     |
| 771 | 753 | 756 | 1  | BACKBONE            |
| 772 | 756 | 757 | 1  |                     |
| 773 | 756 | 758 | 1  |                     |
| 774 | 756 | 759 | 1  | BACKBONE            |
| 775 | 759 | 760 | 1  |                     |
| 776 | 759 | 761 | 1  |                     |
| 777 | 759 | 762 | 1  | BACKBONE            |
| 778 | 762 | 763 | 1  |                     |
| 779 | 762 | 764 | 1  |                     |
| 780 | 765 | 766 | 1  | BACKBONE            |
| 781 | 765 | 773 | 1  |                     |
| 782 | 766 | 767 | 1  | BACKBONE            |
| 783 | 766 | 769 | 1  |                     |
| 784 | 766 | 774 | 1  |                     |
| 785 | 767 | 768 | 2  | BACKBONE            |
| 786 | 767 | 783 | am | BACKBONE   INTERRES |
| 787 | 769 | 770 | 1  |                     |
| 788 | 769 | 775 | 1  |                     |
| 789 | 769 | 776 | 1  |                     |
| 790 | 770 | 771 | 1  |                     |
| 791 | 770 | 777 | 1  |                     |
| 792 | 770 | 778 | 1  |                     |
| 793 | 771 | 772 | 1  |                     |
| 794 | 771 | 779 | 1  |                     |
| 795 | 771 | 780 | 1  |                     |
| 796 | 772 | 781 | 1  |                     |
| 797 | 772 | 782 | 1  |                     |
| 798 | 783 | 784 | 1  | BACKBONE            |
| 799 | 783 | 790 | 1  |                     |
| 800 | 784 | 785 | 1  | BACKBONE            |
| 801 | 784 | 787 | 1  |                     |
| 802 | 784 | 791 | 1  |                     |
| 803 | 785 | 786 | 2  | BACKBONE            |
| 804 | 785 | 799 | am | BACKBONE   INTERRES |
| 805 | 787 | 788 | 1  |                     |
| 806 | 787 | 789 | 1  |                     |
| 807 | 787 | 792 | 1  |                     |
| 808 | 788 | 793 | 1  |                     |
| 809 | 788 | 794 | 1  |                     |
| 810 | 788 | 795 | 1  |                     |

|     |     |     |    |                     |
|-----|-----|-----|----|---------------------|
| 811 | 789 | 796 | 1  |                     |
| 812 | 789 | 797 | 1  |                     |
| 813 | 789 | 798 | 1  |                     |
| 814 | 799 | 800 | 1  | BACKBONE            |
| 815 | 799 | 808 | 1  |                     |
| 816 | 800 | 801 | 1  | BACKBONE            |
| 817 | 800 | 803 | 1  |                     |
| 818 | 800 | 809 | 1  |                     |
| 819 | 801 | 802 | 2  | BACKBONE            |
| 820 | 801 | 821 | am | BACKBONE   INTERRES |
| 821 | 803 | 804 | 1  |                     |
| 822 | 803 | 810 | 1  |                     |
| 823 | 803 | 811 | 1  |                     |
| 824 | 804 | 805 | 1  |                     |
| 825 | 804 | 812 | 1  |                     |
| 826 | 804 | 813 | 1  |                     |
| 827 | 805 | 806 | 1  |                     |
| 828 | 805 | 814 | 1  |                     |
| 829 | 805 | 815 | 1  |                     |
| 830 | 806 | 807 | 1  |                     |
| 831 | 806 | 816 | 1  |                     |
| 832 | 806 | 817 | 1  |                     |
| 833 | 807 | 818 | 1  |                     |
| 834 | 807 | 819 | 1  |                     |
| 835 | 807 | 820 | 1  |                     |
| 836 | 821 | 822 | 1  | BACKBONE            |
| 837 | 821 | 827 | 1  |                     |
| 838 | 822 | 823 | 1  | BACKBONE            |
| 839 | 822 | 825 | 1  |                     |
| 840 | 822 | 828 | 1  |                     |
| 841 | 823 | 824 | 2  | BACKBONE            |
| 842 | 823 | 833 | am | BACKBONE   INTERRES |
| 843 | 825 | 826 | 1  |                     |
| 844 | 825 | 829 | 1  |                     |
| 845 | 825 | 830 | 1  |                     |
| 846 | 826 | 831 | 1  |                     |
| 847 | 826 | 832 | 1  |                     |
| 848 | 833 | 834 | 1  | BACKBONE            |
| 849 | 833 | 844 | 1  |                     |
| 850 | 834 | 835 | 1  | BACKBONE            |
| 851 | 834 | 837 | 1  |                     |
| 852 | 834 | 845 | 1  |                     |
| 853 | 835 | 836 | 2  | BACKBONE            |
| 854 | 835 | 853 | am | BACKBONE   INTERRES |
| 855 | 837 | 838 | 1  |                     |
| 856 | 837 | 846 | 1  |                     |
| 857 | 837 | 847 | 1  |                     |
| 858 | 838 | 839 | ar |                     |
| 859 | 838 | 840 | ar |                     |
| 860 | 839 | 841 | ar |                     |
| 861 | 839 | 848 | 1  |                     |
| 862 | 840 | 842 | ar |                     |



|     |     |     |    |                     |
|-----|-----|-----|----|---------------------|
| 863 | 840 | 849 | 1  |                     |
| 864 | 841 | 843 | ar |                     |
| 865 | 841 | 850 | 1  |                     |
| 866 | 842 | 843 | ar |                     |
| 867 | 842 | 851 | 1  |                     |
| 868 | 843 | 852 | 1  |                     |
| 869 | 853 | 854 | 1  | BACKBONE            |
| 870 | 853 | 863 | 1  |                     |
| 871 | 854 | 855 | 1  | BACKBONE            |
| 872 | 854 | 857 | 1  |                     |
| 873 | 854 | 864 | 1  |                     |
| 874 | 855 | 856 | 2  | BACKBONE            |
| 875 | 855 | 870 | am | BACKBONE   INTERRES |
| 876 | 857 | 858 | 1  |                     |
| 877 | 857 | 865 | 1  |                     |
| 878 | 857 | 866 | 1  |                     |
| 879 | 858 | 859 | 1  |                     |
| 880 | 858 | 860 | 2  |                     |
| 881 | 859 | 861 | 1  |                     |
| 882 | 859 | 867 | 1  |                     |
| 883 | 860 | 862 | 1  |                     |
| 884 | 860 | 868 | 1  |                     |
| 885 | 861 | 862 | 2  |                     |
| 886 | 861 | 869 | 1  |                     |
| 887 | 870 | 871 | 1  | BACKBONE            |
| 888 | 870 | 876 | 1  |                     |
| 889 | 871 | 872 | 1  | BACKBONE            |
| 890 | 871 | 874 | 1  |                     |
| 891 | 871 | 877 | 1  |                     |
| 892 | 872 | 873 | 2  | BACKBONE            |
| 893 | 872 | 882 | am | BACKBONE   INTERRES |
| 894 | 874 | 875 | 1  |                     |
| 895 | 874 | 878 | 1  |                     |
| 896 | 874 | 879 | 1  |                     |
| 897 | 875 | 880 | 1  |                     |
| 898 | 875 | 881 | 1  |                     |
| 899 | 882 | 883 | 1  | BACKBONE            |
| 900 | 882 | 886 | 1  |                     |
| 901 | 883 | 884 | 1  | BACKBONE            |
| 902 | 883 | 887 | 1  |                     |
| 903 | 883 | 888 | 1  |                     |
| 904 | 884 | 885 | 2  | BACKBONE            |
| 905 | 884 | 889 | am | BACKBONE   INTERRES |
| 906 | 889 | 890 | 1  | BACKBONE            |
| 907 | 889 | 893 | 1  |                     |
| 908 | 890 | 891 | 1  | BACKBONE            |
| 909 | 890 | 894 | 1  |                     |
| 910 | 890 | 895 | 1  |                     |
| 911 | 891 | 892 | 2  | BACKBONE            |
| 912 | 891 | 896 | am | BACKBONE   INTERRES |
| 913 | 896 | 897 | 1  | BACKBONE            |
| 914 | 896 | 900 | 1  |                     |

|     |     |     |    |                     |
|-----|-----|-----|----|---------------------|
| 915 | 897 | 898 | 1  | BACKBONE            |
| 916 | 897 | 901 | 1  |                     |
| 917 | 897 | 902 | 1  |                     |
| 918 | 898 | 899 | 2  | BACKBONE            |
| 919 | 898 | 903 | am | BACKBONE   INTERRES |
| 920 | 903 | 904 | 1  | BACKBONE            |
| 921 | 903 | 911 | 1  |                     |
| 922 | 904 | 905 | 1  | BACKBONE            |
| 923 | 904 | 907 | 1  |                     |
| 924 | 904 | 912 | 1  |                     |
| 925 | 905 | 906 | 2  | BACKBONE            |
| 926 | 905 | 922 | am | BACKBONE   INTERRES |
| 927 | 907 | 908 | 1  |                     |
| 928 | 907 | 913 | 1  |                     |
| 929 | 907 | 914 | 1  |                     |
| 930 | 908 | 909 | 1  |                     |
| 931 | 908 | 910 | 1  |                     |
| 932 | 908 | 915 | 1  |                     |
| 933 | 909 | 916 | 1  |                     |
| 934 | 909 | 917 | 1  |                     |
| 935 | 909 | 918 | 1  |                     |
| 936 | 910 | 919 | 1  |                     |
| 937 | 910 | 920 | 1  |                     |
| 938 | 910 | 921 | 1  |                     |
| 939 | 922 | 923 | 1  | BACKBONE            |
| 940 | 922 | 929 | 1  |                     |
| 941 | 923 | 924 | 1  | BACKBONE            |
| 942 | 923 | 926 | 1  |                     |
| 943 | 923 | 930 | 1  |                     |
| 944 | 924 | 925 | 2  | BACKBONE            |
| 945 | 924 | 936 | am | BACKBONE   INTERRES |
| 946 | 926 | 927 | 1  |                     |
| 947 | 926 | 928 | 1  |                     |
| 948 | 926 | 931 | 1  |                     |
| 949 | 927 | 932 | 1  |                     |
| 950 | 928 | 933 | 1  |                     |
| 951 | 928 | 934 | 1  |                     |
| 952 | 928 | 935 | 1  |                     |
| 953 | 936 | 937 | 1  | BACKBONE            |
| 954 | 936 | 944 | 1  |                     |
| 955 | 937 | 938 | 1  | BACKBONE            |
| 956 | 937 | 940 | 1  |                     |
| 957 | 937 | 945 | 1  |                     |
| 958 | 938 | 939 | 2  | BACKBONE            |
| 959 | 938 | 948 | am | BACKBONE   INTERRES |
| 960 | 940 | 941 | 1  |                     |
| 961 | 940 | 946 | 1  |                     |
| 962 | 940 | 947 | 1  |                     |
| 963 | 941 | 942 | ar |                     |
| 964 | 941 | 943 | ar |                     |
| 965 | 948 | 949 | 1  | BACKBONE            |
| 966 | 948 | 962 | 1  |                     |

|      |     |      |    |                     |
|------|-----|------|----|---------------------|
| 967  | 949 | 950  | 1  | BACKBONE            |
| 968  | 949 | 952  | 1  |                     |
| 969  | 949 | 963  | 1  |                     |
| 970  | 950 | 951  | 2  | BACKBONE            |
| 971  | 950 | 972  | am | BACKBONE   INTERRES |
| 972  | 952 | 953  | 1  |                     |
| 973  | 952 | 964  | 1  |                     |
| 974  | 952 | 965  | 1  |                     |
| 975  | 953 | 954  | 2  |                     |
| 976  | 953 | 955  | 1  |                     |
| 977  | 954 | 956  | 1  |                     |
| 978  | 954 | 966  | 1  |                     |
| 979  | 955 | 957  | ar |                     |
| 980  | 955 | 958  | ar |                     |
| 981  | 956 | 957  | 1  |                     |
| 982  | 956 | 967  | 1  |                     |
| 983  | 957 | 959  | ar |                     |
| 984  | 958 | 960  | ar |                     |
| 985  | 958 | 968  | 1  |                     |
| 986  | 959 | 961  | ar |                     |
| 987  | 959 | 969  | 1  |                     |
| 988  | 960 | 961  | ar |                     |
| 989  | 960 | 970  | 1  |                     |
| 990  | 961 | 971  | 1  |                     |
| 991  | 972 | 973  | 1  | BACKBONE            |
| 992  | 972 | 981  | 1  |                     |
| 993  | 973 | 974  | 1  | BACKBONE            |
| 994  | 973 | 976  | 1  |                     |
| 995  | 973 | 982  | 1  |                     |
| 996  | 974 | 975  | 2  | BACKBONE            |
| 997  | 974 | 994  | am | BACKBONE   INTERRES |
| 998  | 976 | 977  | 1  |                     |
| 999  | 976 | 983  | 1  |                     |
| 1000 | 976 | 984  | 1  |                     |
| 1001 | 977 | 978  | 1  |                     |
| 1002 | 977 | 985  | 1  |                     |
| 1003 | 977 | 986  | 1  |                     |
| 1004 | 978 | 979  | 1  |                     |
| 1005 | 978 | 987  | 1  |                     |
| 1006 | 978 | 988  | 1  |                     |
| 1007 | 979 | 980  | 1  |                     |
| 1008 | 979 | 989  | 1  |                     |
| 1009 | 979 | 990  | 1  |                     |
| 1010 | 980 | 991  | 1  |                     |
| 1011 | 980 | 992  | 1  |                     |
| 1012 | 980 | 993  | 1  |                     |
| 1013 | 994 | 995  | 1  | BACKBONE            |
| 1014 | 994 | 1000 | 1  |                     |
| 1015 | 995 | 996  | 1  | BACKBONE            |
| 1016 | 995 | 998  | 1  |                     |
| 1017 | 995 | 1001 | 1  |                     |
| 1018 | 996 | 997  | 2  | BACKBONE            |

|      |      |      |    |                     |
|------|------|------|----|---------------------|
| 1019 | 996  | 1008 | am | BACKBONE   INTERRES |
| 1020 | 998  | 999  | 1  |                     |
| 1021 | 998  | 1002 | 1  |                     |
| 1022 | 998  | 1003 | 1  |                     |
| 1023 | 999  | 1000 | 1  |                     |
| 1024 | 999  | 1004 | 1  |                     |
| 1025 | 999  | 1005 | 1  |                     |
| 1026 | 1000 | 1006 | 1  |                     |
| 1027 | 1000 | 1007 | 1  |                     |
| 1028 | 1008 | 1009 | 1  | BACKBONE            |
| 1029 | 1008 | 1014 | 1  |                     |
| 1030 | 1009 | 1010 | 1  | BACKBONE            |
| 1031 | 1009 | 1012 | 1  |                     |
| 1032 | 1009 | 1015 | 1  |                     |
| 1033 | 1010 | 1011 | 2  | BACKBONE            |
| 1034 | 1010 | 1019 | am | BACKBONE   INTERRES |
| 1035 | 1012 | 1013 | 1  |                     |
| 1036 | 1012 | 1016 | 1  |                     |
| 1037 | 1012 | 1017 | 1  |                     |
| 1038 | 1013 | 1018 | 1  |                     |
| 1039 | 1019 | 1020 | 1  | BACKBONE            |
| 1040 | 1019 | 1028 | 1  |                     |
| 1041 | 1020 | 1021 | 1  | BACKBONE            |
| 1042 | 1020 | 1023 | 1  |                     |
| 1043 | 1020 | 1029 | 1  |                     |
| 1044 | 1021 | 1022 | 2  | BACKBONE            |
| 1045 | 1021 | 1034 | am | BACKBONE   INTERRES |
| 1046 | 1023 | 1024 | 1  |                     |
| 1047 | 1023 | 1030 | 1  |                     |
| 1048 | 1023 | 1031 | 1  |                     |
| 1049 | 1024 | 1025 | 1  |                     |
| 1050 | 1024 | 1032 | 1  |                     |
| 1051 | 1024 | 1033 | 1  |                     |
| 1052 | 1025 | 1026 | ar |                     |
| 1053 | 1025 | 1027 | ar |                     |
| 1054 | 1034 | 1035 | 1  | BACKBONE            |
| 1055 | 1034 | 1042 | 1  |                     |
| 1056 | 1035 | 1036 | 1  | BACKBONE            |
| 1057 | 1035 | 1038 | 1  |                     |
| 1058 | 1035 | 1043 | 1  |                     |
| 1059 | 1036 | 1037 | 2  | BACKBONE            |
| 1060 | 1036 | 1046 | am | BACKBONE   INTERRES |
| 1061 | 1038 | 1039 | 1  |                     |
| 1062 | 1038 | 1044 | 1  |                     |
| 1063 | 1038 | 1045 | 1  |                     |
| 1064 | 1039 | 1040 | ar |                     |
| 1065 | 1039 | 1041 | ar |                     |
| 1066 | 1046 | 1047 | 1  | BACKBONE            |
| 1067 | 1046 | 1052 | 1  |                     |
| 1068 | 1047 | 1048 | 1  | BACKBONE            |
| 1069 | 1047 | 1050 | 1  |                     |
| 1070 | 1047 | 1053 | 1  |                     |

|      |      |      |    |                     |
|------|------|------|----|---------------------|
| 1071 | 1048 | 1049 | 2  | BACKBONE            |
| 1072 | 1048 | 1060 | am | BACKBONE   INTERRES |
| 1073 | 1050 | 1051 | 1  |                     |
| 1074 | 1050 | 1054 | 1  |                     |
| 1075 | 1050 | 1055 | 1  |                     |
| 1076 | 1051 | 1052 | 1  |                     |
| 1077 | 1051 | 1056 | 1  |                     |
| 1078 | 1051 | 1057 | 1  |                     |
| 1079 | 1052 | 1058 | 1  |                     |
| 1080 | 1052 | 1059 | 1  |                     |
| 1081 | 1060 | 1061 | 1  | BACKBONE            |
| 1082 | 1060 | 1074 | 1  |                     |
| 1083 | 1061 | 1062 | 1  | BACKBONE            |
| 1084 | 1061 | 1064 | 1  |                     |
| 1085 | 1061 | 1075 | 1  |                     |
| 1086 | 1062 | 1063 | 2  | BACKBONE            |
| 1087 | 1062 | 1084 | am | BACKBONE   INTERRES |
| 1088 | 1064 | 1065 | 1  |                     |
| 1089 | 1064 | 1076 | 1  |                     |
| 1090 | 1064 | 1077 | 1  |                     |
| 1091 | 1065 | 1066 | 2  |                     |
| 1092 | 1065 | 1067 | 1  |                     |
| 1093 | 1066 | 1068 | 1  |                     |
| 1094 | 1066 | 1078 | 1  |                     |
| 1095 | 1067 | 1069 | ar |                     |
| 1096 | 1067 | 1070 | ar |                     |
| 1097 | 1068 | 1069 | 1  |                     |
| 1098 | 1068 | 1079 | 1  |                     |
| 1099 | 1069 | 1071 | ar |                     |
| 1100 | 1070 | 1072 | ar |                     |
| 1101 | 1070 | 1080 | 1  |                     |
| 1102 | 1071 | 1073 | ar |                     |
| 1103 | 1071 | 1081 | 1  |                     |
| 1104 | 1072 | 1073 | ar |                     |
| 1105 | 1072 | 1082 | 1  |                     |
| 1106 | 1073 | 1083 | 1  |                     |
| 1107 | 1084 | 1085 | 1  | BACKBONE            |
| 1108 | 1084 | 1093 | 1  |                     |
| 1109 | 1085 | 1086 | 1  | BACKBONE            |
| 1110 | 1085 | 1088 | 1  |                     |
| 1111 | 1085 | 1094 | 1  |                     |
| 1112 | 1086 | 1087 | 2  | BACKBONE            |
| 1113 | 1086 | 1099 | am | BACKBONE   INTERRES |
| 1114 | 1088 | 1089 | 1  |                     |
| 1115 | 1088 | 1095 | 1  |                     |
| 1116 | 1088 | 1096 | 1  |                     |
| 1117 | 1089 | 1090 | 1  |                     |
| 1118 | 1089 | 1097 | 1  |                     |
| 1119 | 1089 | 1098 | 1  |                     |
| 1120 | 1090 | 1091 | ar |                     |
| 1121 | 1090 | 1092 | ar |                     |
| 1122 | 1099 | 1100 | 1  | BACKBONE            |

|      |      |      |    |                     |
|------|------|------|----|---------------------|
| 1123 | 1099 | 1108 | 1  |                     |
| 1124 | 1100 | 1101 | 1  | BACKBONE            |
| 1125 | 1100 | 1103 | 1  |                     |
| 1126 | 1100 | 1109 | 1  |                     |
| 1127 | 1101 | 1102 | 2  | BACKBONE            |
| 1128 | 1101 | 1116 | am | BACKBONE   INTERRES |
| 1129 | 1103 | 1104 | 1  |                     |
| 1130 | 1103 | 1110 | 1  |                     |
| 1131 | 1103 | 1111 | 1  |                     |
| 1132 | 1104 | 1105 | 1  |                     |
| 1133 | 1104 | 1112 | 1  |                     |
| 1134 | 1104 | 1113 | 1  |                     |
| 1135 | 1105 | 1106 | 2  |                     |
| 1136 | 1105 | 1107 | am |                     |
| 1137 | 1107 | 1114 | 1  |                     |
| 1138 | 1107 | 1115 | 1  |                     |
| 1139 | 1116 | 1117 | 1  | BACKBONE            |
| 1140 | 1116 | 1126 | 1  |                     |
| 1141 | 1117 | 1118 | 1  | BACKBONE            |
| 1142 | 1117 | 1120 | 1  |                     |
| 1143 | 1117 | 1127 | 1  |                     |
| 1144 | 1118 | 1119 | 2  | BACKBONE            |
| 1145 | 1118 | 1133 | am | BACKBONE   INTERRES |
| 1146 | 1120 | 1121 | 1  |                     |
| 1147 | 1120 | 1128 | 1  |                     |
| 1148 | 1120 | 1129 | 1  |                     |
| 1149 | 1121 | 1122 | 1  |                     |
| 1150 | 1121 | 1123 | 2  |                     |
| 1151 | 1122 | 1124 | ar |                     |
| 1152 | 1122 | 1130 | 1  |                     |
| 1153 | 1123 | 1125 | 1  |                     |
| 1154 | 1123 | 1131 | 1  |                     |
| 1155 | 1124 | 1125 | 1  |                     |
| 1156 | 1124 | 1132 | 1  |                     |
| 1157 | 1133 | 1134 | 1  | BACKBONE            |
| 1158 | 1133 | 1138 | 1  |                     |
| 1159 | 1134 | 1135 | 1  | BACKBONE            |
| 1160 | 1134 | 1137 | 1  |                     |
| 1161 | 1134 | 1139 | 1  |                     |
| 1162 | 1135 | 1136 | 2  | BACKBONE            |
| 1163 | 1135 | 1143 | am | BACKBONE   INTERRES |
| 1164 | 1137 | 1140 | 1  |                     |
| 1165 | 1137 | 1141 | 1  |                     |
| 1166 | 1137 | 1142 | 1  |                     |
| 1167 | 1143 | 1144 | 1  | BACKBONE            |
| 1168 | 1143 | 1152 | 1  |                     |
| 1169 | 1144 | 1145 | 1  | BACKBONE            |
| 1170 | 1144 | 1147 | 1  |                     |
| 1171 | 1144 | 1153 | 1  |                     |
| 1172 | 1145 | 1146 | 2  | BACKBONE            |
| 1173 | 1145 | 1165 | am | BACKBONE   INTERRES |
| 1174 | 1147 | 1148 | 1  |                     |

|      |      |      |    |                     |
|------|------|------|----|---------------------|
| 1175 | 1147 | 1154 | 1  |                     |
| 1176 | 1147 | 1155 | 1  |                     |
| 1177 | 1148 | 1149 | 1  |                     |
| 1178 | 1148 | 1156 | 1  |                     |
| 1179 | 1148 | 1157 | 1  |                     |
| 1180 | 1149 | 1150 | 1  |                     |
| 1181 | 1149 | 1158 | 1  |                     |
| 1182 | 1149 | 1159 | 1  |                     |
| 1183 | 1150 | 1151 | 1  |                     |
| 1184 | 1150 | 1160 | 1  |                     |
| 1185 | 1150 | 1161 | 1  |                     |
| 1186 | 1151 | 1162 | 1  |                     |
| 1187 | 1151 | 1163 | 1  |                     |
| 1188 | 1151 | 1164 | 1  |                     |
| 1189 | 1165 | 1166 | 1  | BACKBONE            |
| 1190 | 1165 | 1179 | 1  |                     |
| 1191 | 1166 | 1167 | 1  | BACKBONE            |
| 1192 | 1166 | 1169 | 1  |                     |
| 1193 | 1166 | 1180 | 1  |                     |
| 1194 | 1167 | 1168 | 2  | BACKBONE            |
| 1195 | 1167 | 1189 | am | BACKBONE   INTERRES |
| 1196 | 1169 | 1170 | 1  |                     |
| 1197 | 1169 | 1181 | 1  |                     |
| 1198 | 1169 | 1182 | 1  |                     |
| 1199 | 1170 | 1171 | 2  |                     |
| 1200 | 1170 | 1172 | 1  |                     |
| 1201 | 1171 | 1173 | 1  |                     |
| 1202 | 1171 | 1183 | 1  |                     |
| 1203 | 1172 | 1174 | ar |                     |
| 1204 | 1172 | 1175 | ar |                     |
| 1205 | 1173 | 1174 | 1  |                     |
| 1206 | 1173 | 1184 | 1  |                     |
| 1207 | 1174 | 1176 | ar |                     |
| 1208 | 1175 | 1177 | ar |                     |
| 1209 | 1175 | 1185 | 1  |                     |
| 1210 | 1176 | 1178 | ar |                     |
| 1211 | 1176 | 1186 | 1  |                     |
| 1212 | 1177 | 1178 | ar |                     |
| 1213 | 1177 | 1187 | 1  |                     |
| 1214 | 1178 | 1188 | 1  |                     |
| 1215 | 1189 | 1190 | 1  | BACKBONE            |
| 1216 | 1189 | 1201 | 1  |                     |
| 1217 | 1190 | 1191 | 1  | BACKBONE            |
| 1218 | 1190 | 1193 | 1  |                     |
| 1219 | 1190 | 1202 | 1  |                     |
| 1220 | 1191 | 1192 | 2  | BACKBONE            |
| 1221 | 1191 | 1210 | am | BACKBONE   INTERRES |
| 1222 | 1193 | 1194 | 1  |                     |
| 1223 | 1193 | 1203 | 1  |                     |
| 1224 | 1193 | 1204 | 1  |                     |
| 1225 | 1194 | 1195 | ar |                     |
| 1226 | 1194 | 1196 | ar |                     |

|      |      |      |    |                     |
|------|------|------|----|---------------------|
| 1227 | 1195 | 1197 | ar |                     |
| 1228 | 1195 | 1205 | 1  |                     |
| 1229 | 1196 | 1198 | ar |                     |
| 1230 | 1196 | 1206 | 1  |                     |
| 1231 | 1197 | 1199 | ar |                     |
| 1232 | 1197 | 1207 | 1  |                     |
| 1233 | 1198 | 1199 | ar |                     |
| 1234 | 1198 | 1208 | 1  |                     |
| 1235 | 1199 | 1200 | 1  |                     |
| 1236 | 1200 | 1209 | 1  |                     |
| 1237 | 1210 | 1211 | 1  | BACKBONE            |
| 1238 | 1210 | 1216 | 1  |                     |
| 1239 | 1211 | 1212 | 1  | BACKBONE            |
| 1240 | 1211 | 1214 | 1  |                     |
| 1241 | 1211 | 1217 | 1  |                     |
| 1242 | 1212 | 1213 | 2  | BACKBONE            |
| 1243 | 1212 | 1224 | am | BACKBONE   INTERRES |
| 1244 | 1214 | 1215 | 1  |                     |
| 1245 | 1214 | 1218 | 1  |                     |
| 1246 | 1214 | 1219 | 1  |                     |
| 1247 | 1215 | 1216 | 1  |                     |
| 1248 | 1215 | 1220 | 1  |                     |
| 1249 | 1215 | 1221 | 1  |                     |
| 1250 | 1216 | 1222 | 1  |                     |
| 1251 | 1216 | 1223 | 1  |                     |
| 1252 | 1224 | 1225 | 1  | BACKBONE            |
| 1253 | 1224 | 1228 | 1  |                     |
| 1254 | 1225 | 1226 | 1  | BACKBONE            |
| 1255 | 1225 | 1229 | 1  |                     |
| 1256 | 1225 | 1230 | 1  |                     |
| 1257 | 1226 | 1227 | 2  | BACKBONE            |
| 1258 | 1226 | 1231 | am | BACKBONE   INTERRES |
| 1259 | 1231 | 1232 | 1  | BACKBONE            |
| 1260 | 1231 | 1237 | 1  |                     |
| 1261 | 1232 | 1233 | 1  | BACKBONE            |
| 1262 | 1232 | 1235 | 1  |                     |
| 1263 | 1232 | 1238 | 1  |                     |
| 1264 | 1233 | 1234 | 2  | BACKBONE            |
| 1265 | 1233 | 1243 | am | BACKBONE   INTERRES |
| 1266 | 1235 | 1236 | 1  |                     |
| 1267 | 1235 | 1239 | 1  |                     |
| 1268 | 1235 | 1240 | 1  |                     |
| 1269 | 1236 | 1241 | 1  |                     |
| 1270 | 1236 | 1242 | 1  |                     |
| 1271 | 1243 | 1244 | 1  | BACKBONE            |
| 1272 | 1243 | 1252 | 1  |                     |
| 1273 | 1244 | 1245 | 1  | BACKBONE            |
| 1274 | 1244 | 1247 | 1  |                     |
| 1275 | 1244 | 1253 | 1  |                     |
| 1276 | 1245 | 1246 | 2  | BACKBONE            |
| 1277 | 1245 | 1265 | am | BACKBONE   INTERRES |
| 1278 | 1247 | 1248 | 1  |                     |



|      |      |      |    |                     |
|------|------|------|----|---------------------|
| 1279 | 1247 | 1254 | 1  |                     |
| 1280 | 1247 | 1255 | 1  |                     |
| 1281 | 1248 | 1249 | 1  |                     |
| 1282 | 1248 | 1256 | 1  |                     |
| 1283 | 1248 | 1257 | 1  |                     |
| 1284 | 1249 | 1250 | 1  |                     |
| 1285 | 1249 | 1258 | 1  |                     |
| 1286 | 1249 | 1259 | 1  |                     |
| 1287 | 1250 | 1251 | 1  |                     |
| 1288 | 1250 | 1260 | 1  |                     |
| 1289 | 1250 | 1261 | 1  |                     |
| 1290 | 1251 | 1262 | 1  |                     |
| 1291 | 1251 | 1263 | 1  |                     |
| 1292 | 1251 | 1264 | 1  |                     |
| 1293 | 1265 | 1266 | 1  | BACKBONE            |
| 1294 | 1265 | 1277 | 1  |                     |
| 1295 | 1266 | 1267 | 1  | BACKBONE            |
| 1296 | 1266 | 1269 | 1  |                     |
| 1297 | 1266 | 1278 | 1  |                     |
| 1298 | 1267 | 1268 | 2  | BACKBONE            |
| 1299 | 1267 | 1286 | am | BACKBONE   INTERRES |
| 1300 | 1269 | 1270 | 1  |                     |
| 1301 | 1269 | 1279 | 1  |                     |
| 1302 | 1269 | 1280 | 1  |                     |
| 1303 | 1270 | 1271 | ar |                     |
| 1304 | 1270 | 1272 | ar |                     |
| 1305 | 1271 | 1273 | ar |                     |
| 1306 | 1271 | 1281 | 1  |                     |
| 1307 | 1272 | 1274 | ar |                     |
| 1308 | 1272 | 1282 | 1  |                     |
| 1309 | 1273 | 1275 | ar |                     |
| 1310 | 1273 | 1283 | 1  |                     |
| 1311 | 1274 | 1275 | ar |                     |
| 1312 | 1274 | 1284 | 1  |                     |
| 1313 | 1275 | 1276 | 1  |                     |
| 1314 | 1276 | 1285 | 1  |                     |
| 1315 | 1286 | 1287 | 1  | BACKBONE            |
| 1316 | 1286 | 1294 | 1  |                     |
| 1317 | 1287 | 1288 | 1  | BACKBONE            |
| 1318 | 1287 | 1290 | 1  |                     |
| 1319 | 1287 | 1295 | 1  |                     |
| 1320 | 1288 | 1289 | 2  | BACKBONE            |
| 1321 | 1288 | 1305 | am | BACKBONE   INTERRES |
| 1322 | 1290 | 1291 | 1  |                     |
| 1323 | 1290 | 1296 | 1  |                     |
| 1324 | 1290 | 1297 | 1  |                     |
| 1325 | 1291 | 1292 | 1  |                     |
| 1326 | 1291 | 1293 | 1  |                     |
| 1327 | 1291 | 1298 | 1  |                     |
| 1328 | 1292 | 1299 | 1  |                     |
| 1329 | 1292 | 1300 | 1  |                     |
| 1330 | 1292 | 1301 | 1  |                     |

|      |      |      |    |                     |
|------|------|------|----|---------------------|
| 1331 | 1293 | 1302 | 1  |                     |
| 1332 | 1293 | 1303 | 1  |                     |
| 1333 | 1293 | 1304 | 1  |                     |
| 1334 | 1305 | 1306 | 1  | BACKBONE            |
| 1335 | 1305 | 1313 | 1  |                     |
| 1336 | 1306 | 1307 | 1  | BACKBONE            |
| 1337 | 1306 | 1309 | 1  |                     |
| 1338 | 1306 | 1314 | 1  |                     |
| 1339 | 1307 | 1308 | 2  | BACKBONE            |
| 1340 | 1307 | 1324 | am | BACKBONE   INTERRES |
| 1341 | 1309 | 1310 | 1  |                     |
| 1342 | 1309 | 1315 | 1  |                     |
| 1343 | 1309 | 1316 | 1  |                     |
| 1344 | 1310 | 1311 | 1  |                     |
| 1345 | 1310 | 1312 | 1  |                     |
| 1346 | 1310 | 1317 | 1  |                     |
| 1347 | 1311 | 1318 | 1  |                     |
| 1348 | 1311 | 1319 | 1  |                     |
| 1349 | 1311 | 1320 | 1  |                     |
| 1350 | 1312 | 1321 | 1  |                     |
| 1351 | 1312 | 1322 | 1  |                     |
| 1352 | 1312 | 1323 | 1  |                     |
| 1353 | 1324 | 1325 | 1  | BACKBONE            |
| 1354 | 1324 | 1333 | 1  |                     |
| 1355 | 1325 | 1326 | 1  | BACKBONE            |
| 1356 | 1325 | 1328 | 1  |                     |
| 1357 | 1325 | 1334 | 1  |                     |
| 1358 | 1326 | 1327 | 2  | BACKBONE            |
| 1359 | 1326 | 1339 | am | BACKBONE   INTERRES |
| 1360 | 1328 | 1329 | 1  |                     |
| 1361 | 1328 | 1335 | 1  |                     |
| 1362 | 1328 | 1336 | 1  |                     |
| 1363 | 1329 | 1330 | 1  |                     |
| 1364 | 1329 | 1337 | 1  |                     |
| 1365 | 1329 | 1338 | 1  |                     |
| 1366 | 1330 | 1331 | ar |                     |
| 1367 | 1330 | 1332 | ar |                     |
| 1368 | 1339 | 1340 | 1  | BACKBONE            |
| 1369 | 1339 | 1348 | 1  |                     |
| 1370 | 1340 | 1341 | 1  | BACKBONE            |
| 1371 | 1340 | 1343 | 1  |                     |
| 1372 | 1340 | 1349 | 1  |                     |
| 1373 | 1341 | 1342 | 2  | BACKBONE            |
| 1374 | 1341 | 1356 | am | BACKBONE   INTERRES |
| 1375 | 1343 | 1344 | 1  |                     |
| 1376 | 1343 | 1350 | 1  |                     |
| 1377 | 1343 | 1351 | 1  |                     |
| 1378 | 1344 | 1345 | 1  |                     |
| 1379 | 1344 | 1352 | 1  |                     |
| 1380 | 1344 | 1353 | 1  |                     |
| 1381 | 1345 | 1346 | 2  |                     |
| 1382 | 1345 | 1347 | am |                     |

|      |      |      |    |                     |
|------|------|------|----|---------------------|
| 1383 | 1347 | 1354 | 1  |                     |
| 1384 | 1347 | 1355 | 1  |                     |
| 1385 | 1356 | 1357 | 1  | BACKBONE            |
| 1386 | 1356 | 1365 | 1  |                     |
| 1387 | 1357 | 1358 | 1  | BACKBONE            |
| 1388 | 1357 | 1360 | 1  |                     |
| 1389 | 1357 | 1366 | 1  |                     |
| 1390 | 1358 | 1359 | 2  | BACKBONE            |
| 1391 | 1358 | 1378 | am | BACKBONE   INTERRES |
| 1392 | 1360 | 1361 | 1  |                     |
| 1393 | 1360 | 1367 | 1  |                     |
| 1394 | 1360 | 1368 | 1  |                     |
| 1395 | 1361 | 1362 | 1  |                     |
| 1396 | 1361 | 1369 | 1  |                     |
| 1397 | 1361 | 1370 | 1  |                     |
| 1398 | 1362 | 1363 | 1  |                     |
| 1399 | 1362 | 1371 | 1  |                     |
| 1400 | 1362 | 1372 | 1  |                     |
| 1401 | 1363 | 1364 | 1  |                     |
| 1402 | 1363 | 1373 | 1  |                     |
| 1403 | 1363 | 1374 | 1  |                     |
| 1404 | 1364 | 1375 | 1  |                     |
| 1405 | 1364 | 1376 | 1  |                     |
| 1406 | 1364 | 1377 | 1  |                     |
| 1407 | 1378 | 1379 | 1  | BACKBONE            |
| 1408 | 1378 | 1382 | 1  |                     |
| 1409 | 1379 | 1380 | 1  | BACKBONE            |
| 1410 | 1379 | 1383 | 1  |                     |
| 1411 | 1379 | 1384 | 1  |                     |
| 1412 | 1380 | 1381 | 2  | BACKBONE            |
| 1413 | 1380 | 1385 | am | BACKBONE   INTERRES |
| 1414 | 1385 | 1386 | 1  | BACKBONE            |
| 1415 | 1385 | 1394 | 1  |                     |
| 1416 | 1386 | 1387 | 1  | BACKBONE            |
| 1417 | 1386 | 1389 | 1  |                     |
| 1418 | 1386 | 1395 | 1  |                     |
| 1419 | 1387 | 1388 | 2  | BACKBONE            |
| 1420 | 1387 | 1402 | am | BACKBONE   INTERRES |
| 1421 | 1389 | 1390 | 1  |                     |
| 1422 | 1389 | 1396 | 1  |                     |
| 1423 | 1389 | 1397 | 1  |                     |
| 1424 | 1390 | 1391 | 1  |                     |
| 1425 | 1390 | 1398 | 1  |                     |
| 1426 | 1390 | 1399 | 1  |                     |
| 1427 | 1391 | 1392 | 2  |                     |
| 1428 | 1391 | 1393 | am |                     |
| 1429 | 1393 | 1400 | 1  |                     |
| 1430 | 1393 | 1401 | 1  |                     |
| 1431 | 1402 | 1403 | 1  | BACKBONE            |
| 1432 | 1402 | 1411 | 1  |                     |
| 1433 | 1403 | 1404 | 1  | BACKBONE            |
| 1434 | 1403 | 1406 | 1  |                     |

|      |      |      |    |                     |
|------|------|------|----|---------------------|
| 1435 | 1403 | 1412 | 1  |                     |
| 1436 | 1404 | 1405 | 2  | BACKBONE            |
| 1437 | 1404 | 1417 | am | BACKBONE   INTERRES |
| 1438 | 1406 | 1407 | 1  |                     |
| 1439 | 1406 | 1413 | 1  |                     |
| 1440 | 1406 | 1414 | 1  |                     |
| 1441 | 1407 | 1408 | 1  |                     |
| 1442 | 1407 | 1415 | 1  |                     |
| 1443 | 1407 | 1416 | 1  |                     |
| 1444 | 1408 | 1409 | ar |                     |
| 1445 | 1408 | 1410 | ar |                     |
| 1446 | 1417 | 1418 | 1  | BACKBONE            |
| 1447 | 1417 | 1429 | 1  |                     |
| 1448 | 1418 | 1419 | 1  | BACKBONE            |
| 1449 | 1418 | 1421 | 1  |                     |
| 1450 | 1418 | 1430 | 1  |                     |
| 1451 | 1419 | 1420 | 2  | BACKBONE            |
| 1452 | 1419 | 1438 | am | BACKBONE   INTERRES |
| 1453 | 1421 | 1422 | 1  |                     |
| 1454 | 1421 | 1431 | 1  |                     |
| 1455 | 1421 | 1432 | 1  |                     |
| 1456 | 1422 | 1423 | ar |                     |
| 1457 | 1422 | 1424 | ar |                     |
| 1458 | 1423 | 1425 | ar |                     |
| 1459 | 1423 | 1433 | 1  |                     |
| 1460 | 1424 | 1426 | ar |                     |
| 1461 | 1424 | 1434 | 1  |                     |
| 1462 | 1425 | 1427 | ar |                     |
| 1463 | 1425 | 1435 | 1  |                     |
| 1464 | 1426 | 1427 | ar |                     |
| 1465 | 1426 | 1436 | 1  |                     |
| 1466 | 1427 | 1428 | 1  |                     |
| 1467 | 1428 | 1437 | 1  |                     |
| 1468 | 1438 | 1439 | 1  | BACKBONE            |
| 1469 | 1438 | 1446 | 1  |                     |
| 1470 | 1439 | 1440 | 1  | BACKBONE            |
| 1471 | 1439 | 1442 | 1  |                     |
| 1472 | 1439 | 1447 | 1  |                     |
| 1473 | 1440 | 1441 | 2  | BACKBONE            |
| 1474 | 1440 | 1457 | am | BACKBONE   INTERRES |
| 1475 | 1442 | 1443 | 1  |                     |
| 1476 | 1442 | 1444 | 1  |                     |
| 1477 | 1442 | 1448 | 1  |                     |
| 1478 | 1443 | 1445 | 1  |                     |
| 1479 | 1443 | 1449 | 1  |                     |
| 1480 | 1443 | 1450 | 1  |                     |
| 1481 | 1444 | 1451 | 1  |                     |
| 1482 | 1444 | 1452 | 1  |                     |
| 1483 | 1444 | 1453 | 1  |                     |
| 1484 | 1445 | 1454 | 1  |                     |
| 1485 | 1445 | 1455 | 1  |                     |
| 1486 | 1445 | 1456 | 1  |                     |

|      |      |      |    |                     |
|------|------|------|----|---------------------|
| 1487 | 1457 | 1458 | 1  | BACKBONE            |
| 1488 | 1457 | 1465 | 1  |                     |
| 1489 | 1458 | 1459 | 1  | BACKBONE            |
| 1490 | 1458 | 1461 | 1  |                     |
| 1491 | 1458 | 1466 | 1  |                     |
| 1492 | 1459 | 1460 | 2  | BACKBONE            |
| 1493 | 1459 | 1471 | am | BACKBONE   INTERRES |
| 1494 | 1461 | 1462 | 1  |                     |
| 1495 | 1461 | 1467 | 1  |                     |
| 1496 | 1461 | 1468 | 1  |                     |
| 1497 | 1462 | 1463 | 2  |                     |
| 1498 | 1462 | 1464 | am |                     |
| 1499 | 1464 | 1469 | 1  |                     |
| 1500 | 1464 | 1470 | 1  |                     |
| 1501 | 1471 | 1472 | 1  | BACKBONE            |
| 1502 | 1471 | 1479 | 1  |                     |
| 1503 | 1472 | 1473 | 1  | BACKBONE            |
| 1504 | 1472 | 1475 | 1  |                     |
| 1505 | 1472 | 1480 | 1  |                     |
| 1506 | 1473 | 1474 | 2  | BACKBONE            |
| 1507 | 1473 | 1485 | am | BACKBONE   INTERRES |
| 1508 | 1475 | 1476 | 1  |                     |
| 1509 | 1475 | 1481 | 1  |                     |
| 1510 | 1475 | 1482 | 1  |                     |
| 1511 | 1476 | 1477 | 2  |                     |
| 1512 | 1476 | 1478 | am |                     |
| 1513 | 1478 | 1483 | 1  |                     |
| 1514 | 1478 | 1484 | 1  |                     |
| 1515 | 1485 | 1486 | 1  | BACKBONE            |
| 1516 | 1485 | 1493 | 1  |                     |
| 1517 | 1486 | 1487 | 1  | BACKBONE            |
| 1518 | 1486 | 1489 | 1  |                     |
| 1519 | 1486 | 1494 | 1  |                     |
| 1520 | 1487 | 1488 | 2  | BACKBONE            |
| 1521 | 1487 | 1504 | am | BACKBONE   INTERRES |
| 1522 | 1489 | 1490 | 1  |                     |
| 1523 | 1489 | 1491 | 1  |                     |
| 1524 | 1489 | 1495 | 1  |                     |
| 1525 | 1490 | 1492 | 1  |                     |
| 1526 | 1490 | 1496 | 1  |                     |
| 1527 | 1490 | 1497 | 1  |                     |
| 1528 | 1491 | 1498 | 1  |                     |
| 1529 | 1491 | 1499 | 1  |                     |
| 1530 | 1491 | 1500 | 1  |                     |
| 1531 | 1492 | 1501 | 1  |                     |
| 1532 | 1492 | 1502 | 1  |                     |
| 1533 | 1492 | 1503 | 1  |                     |
| 1534 | 1504 | 1505 | 1  | BACKBONE            |
| 1535 | 1504 | 1514 | 1  |                     |
| 1536 | 1505 | 1506 | 1  | BACKBONE            |
| 1537 | 1505 | 1508 | 1  |                     |
| 1538 | 1505 | 1515 | 1  |                     |

|      |      |      |    |                     |
|------|------|------|----|---------------------|
| 1539 | 1506 | 1507 | 2  | BACKBONE            |
| 1540 | 1506 | 1521 | am | BACKBONE   INTERRES |
| 1541 | 1508 | 1509 | 1  |                     |
| 1542 | 1508 | 1516 | 1  |                     |
| 1543 | 1508 | 1517 | 1  |                     |
| 1544 | 1509 | 1510 | 1  |                     |
| 1545 | 1509 | 1511 | 2  |                     |
| 1546 | 1510 | 1512 | 1  |                     |
| 1547 | 1510 | 1518 | 1  |                     |
| 1548 | 1511 | 1513 | 1  |                     |
| 1549 | 1511 | 1519 | 1  |                     |
| 1550 | 1512 | 1513 | 2  |                     |
| 1551 | 1512 | 1520 | 1  |                     |
| 1552 | 1521 | 1522 | 1  | BACKBONE            |
| 1553 | 1521 | 1529 | 1  |                     |
| 1554 | 1522 | 1523 | 1  | BACKBONE            |
| 1555 | 1522 | 1525 | 1  |                     |
| 1556 | 1522 | 1530 | 1  |                     |
| 1557 | 1523 | 1524 | 2  | BACKBONE            |
| 1558 | 1523 | 1540 | am | BACKBONE   INTERRES |
| 1559 | 1525 | 1526 | 1  |                     |
| 1560 | 1525 | 1531 | 1  |                     |
| 1561 | 1525 | 1532 | 1  |                     |
| 1562 | 1526 | 1527 | 1  |                     |
| 1563 | 1526 | 1528 | 1  |                     |
| 1564 | 1526 | 1533 | 1  |                     |
| 1565 | 1527 | 1534 | 1  |                     |
| 1566 | 1527 | 1535 | 1  |                     |
| 1567 | 1527 | 1536 | 1  |                     |
| 1568 | 1528 | 1537 | 1  |                     |
| 1569 | 1528 | 1538 | 1  |                     |
| 1570 | 1528 | 1539 | 1  |                     |
| 1571 | 1540 | 1541 | 1  | BACKBONE            |
| 1572 | 1540 | 1547 | 1  |                     |
| 1573 | 1541 | 1542 | 1  | BACKBONE            |
| 1574 | 1541 | 1544 | 1  |                     |
| 1575 | 1541 | 1548 | 1  |                     |
| 1576 | 1542 | 1543 | 2  | BACKBONE            |
| 1577 | 1542 | 1554 | am | BACKBONE   INTERRES |
| 1578 | 1544 | 1545 | 1  |                     |
| 1579 | 1544 | 1546 | 1  |                     |
| 1580 | 1544 | 1549 | 1  |                     |
| 1581 | 1545 | 1550 | 1  |                     |
| 1582 | 1546 | 1551 | 1  |                     |
| 1583 | 1546 | 1552 | 1  |                     |
| 1584 | 1546 | 1553 | 1  |                     |
| 1585 | 1554 | 1555 | 1  | BACKBONE            |
| 1586 | 1554 | 1564 | 1  |                     |
| 1587 | 1555 | 1556 | 1  | BACKBONE            |
| 1588 | 1555 | 1558 | 1  |                     |
| 1589 | 1555 | 1565 | 1  |                     |
| 1590 | 1556 | 1557 | 2  | BACKBONE            |

1591 1558 1559 1  
1592 1558 1566 1  
1593 1558 1567 1  
1594 1559 1560 1  
1595 1559 1561 2  
1596 1560 1562 1  
1597 1560 1568 1  
1598 1561 1563 1  
1599 1561 1569 1  
1600 1562 1563 2  
1601 1562 1570 1

@<TRIPOS>SUBSTRUCTURE

1 SER253 2 RESIDUE 4 A SER 1  
2 HIS254 14 RESIDUE 4 A HIS 2  
3 MET255 31 RESIDUE 4 A MET 2  
4 LEU256 50 RESIDUE 4 A LEU 2  
5 PRO257 69 RESIDUE 4 A PRO 2  
6 ARG258 83 RESIDUE 4 A ARG 2  
7 ASN259 107 RESIDUE 4 A ASN 2  
8 PRO260 121 RESIDUE 4 A PRO 2  
9 SER261 135 RESIDUE 4 A SER 2  
10 MET262 146 RESIDUE 4 A MET 2  
11 ALA263 165 RESIDUE 4 A ALA 2  
12 ASP264 175 RESIDUE 4 A ASP 2  
13 TYR265 187 RESIDUE 4 A TYR 2  
14 GLU266 208 RESIDUE 4 A GLU 2  
15 ALA267 223 RESIDUE 4 A ALA 2  
16 ARG268 233 RESIDUE 4 A ARG 2  
17 ILE269 257 RESIDUE 4 A ILE 2  
18 PHE270 276 RESIDUE 4 A PHE 2  
19 THR271 296 RESIDUE 4 A THR 2  
20 PHE272 310 RESIDUE 4 A PHE 2  
21 GLY273 330 RESIDUE 4 A GLY 2  
22 THR274 337 RESIDUE 4 A THR 2  
23 TRP275 351 RESIDUE 4 A TRP 2  
24 ILE276 375 RESIDUE 4 A ILE 2  
25 TYR277 394 RESIDUE 4 A TYR 2  
26 SER278 415 RESIDUE 4 A SER 2  
27 VAL279 426 RESIDUE 4 A VAL 2  
28 ASN280 442 RESIDUE 4 A ASN 2  
29 LYS281 456 RESIDUE 4 A LYS 2  
30 GLU282 478 RESIDUE 4 A GLU 2  
31 GLN283 493 RESIDUE 4 A GLN 2  
32 LEU284 510 RESIDUE 4 A LEU 2  
33 ALA285 529 RESIDUE 4 A ALA 2  
34 ARG286 539 RESIDUE 4 A ARG 2  
35 ALA287 563 RESIDUE 4 A ALA 2  
36 GLY288 573 RESIDUE 4 A GLY 2  
37 PHE289 580 RESIDUE 4 A PHE 2  
38 TYR290 600 RESIDUE 4 A TYR 2  
39 ALA291 621 RESIDUE 4 A ALA 2  
40 LEU292 631 RESIDUE 4 A LEU 2

|    |        |      |         |   |   |     |   |
|----|--------|------|---------|---|---|-----|---|
| 41 | GLY293 | 650  | RESIDUE | 4 | A | GLY | 2 |
| 42 | GLU294 | 657  | RESIDUE | 4 | A | GLU | 2 |
| 43 | GLY295 | 672  | RESIDUE | 4 | A | GLY | 2 |
| 44 | ASP296 | 679  | RESIDUE | 4 | A | ASP | 2 |
| 45 | LYS297 | 766  | RESIDUE | 4 | A | LYS | 2 |
| 46 | VAL298 | 784  | RESIDUE | 4 | A | VAL | 2 |
| 47 | LYS299 | 800  | RESIDUE | 4 | A | LYS | 2 |
| 48 | CYS300 | 822  | RESIDUE | 4 | A | CYS | 2 |
| 49 | PHE301 | 834  | RESIDUE | 4 | A | PHE | 2 |
| 50 | HIS302 | 854  | RESIDUE | 4 | A | HIS | 2 |
| 51 | CYS303 | 871  | RESIDUE | 4 | A | CYS | 2 |
| 52 | GLY304 | 883  | RESIDUE | 4 | A | GLY | 2 |
| 53 | GLY305 | 890  | RESIDUE | 4 | A | GLY | 2 |
| 54 | GLY306 | 897  | RESIDUE | 4 | A | GLY | 2 |
| 55 | LEU307 | 904  | RESIDUE | 4 | A | LEU | 2 |
| 56 | THR308 | 923  | RESIDUE | 4 | A | THR | 2 |
| 57 | ASP309 | 937  | RESIDUE | 4 | A | ASP | 2 |
| 58 | TRP310 | 949  | RESIDUE | 4 | A | TRP | 2 |
| 59 | LYS311 | 973  | RESIDUE | 4 | A | LYS | 2 |
| 60 | PRO312 | 995  | RESIDUE | 4 | A | PRO | 2 |
| 61 | SER313 | 1009 | RESIDUE | 4 | A | SER | 2 |
| 62 | GLU314 | 1020 | RESIDUE | 4 | A | GLU | 2 |
| 63 | ASP315 | 1035 | RESIDUE | 4 | A | ASP | 2 |
| 64 | PRO316 | 1047 | RESIDUE | 4 | A | PRO | 2 |
| 65 | TRP317 | 1061 | RESIDUE | 4 | A | TRP | 2 |
| 66 | GLU318 | 1085 | RESIDUE | 4 | A | GLU | 2 |
| 67 | GLN319 | 1100 | RESIDUE | 4 | A | GLN | 2 |
| 68 | HIS320 | 1117 | RESIDUE | 4 | A | HIS | 2 |
| 69 | ALA321 | 1134 | RESIDUE | 4 | A | ALA | 2 |
| 70 | LYS322 | 1144 | RESIDUE | 4 | A | LYS | 2 |
| 71 | TRP323 | 1166 | RESIDUE | 4 | A | TRP | 2 |
| 72 | TYR324 | 1190 | RESIDUE | 4 | A | TYR | 2 |
| 73 | PRO325 | 1211 | RESIDUE | 4 | A | PRO | 2 |
| 74 | GLY326 | 1225 | RESIDUE | 4 | A | GLY | 2 |
| 75 | CYS327 | 1232 | RESIDUE | 4 | A | CYS | 2 |
| 76 | LYS328 | 1244 | RESIDUE | 4 | A | LYS | 2 |
| 77 | TYR329 | 1266 | RESIDUE | 4 | A | TYR | 2 |
| 78 | LEU330 | 1287 | RESIDUE | 4 | A | LEU | 2 |
| 79 | LEU331 | 1306 | RESIDUE | 4 | A | LEU | 2 |
| 80 | GLU332 | 1325 | RESIDUE | 4 | A | GLU | 2 |
| 81 | GLN333 | 1340 | RESIDUE | 4 | A | GLN | 2 |
| 82 | LYS334 | 1357 | RESIDUE | 4 | A | LYS | 2 |
| 83 | GLY335 | 1379 | RESIDUE | 4 | A | GLY | 2 |
| 84 | GLN336 | 1386 | RESIDUE | 4 | A | GLN | 2 |
| 85 | GLU337 | 1403 | RESIDUE | 4 | A | GLU | 2 |
| 86 | TYR338 | 1418 | RESIDUE | 4 | A | TYR | 2 |
| 87 | ILE339 | 1439 | RESIDUE | 4 | A | ILE | 2 |
| 88 | ASN340 | 1458 | RESIDUE | 4 | A | ASN | 2 |
| 89 | ASN341 | 1472 | RESIDUE | 4 | A | ASN | 2 |
| 90 | ILE342 | 1486 | RESIDUE | 4 | A | ILE | 2 |
| 91 | HIS343 | 1505 | RESIDUE | 4 | A | HIS | 2 |
| 92 | LEU344 | 1522 | RESIDUE | 4 | A | LEU | 2 |



93 THR345 1541 RESIDUE 4 A THR 2  
94 HIS346 1555 RESIDUE 4 A HIS 1

# MOE 2019.01 (io\_trps.svl 2018.10)

## CIAP1-BIR3 + compound 2 .mol2 file

@<TRIPOS>MOLECULE  
COVALENT\_142D6\_3UW4\_CIAP1.A  
1454 1483 87 0 0  
BIOPOLYMER  
USER\_CHARGES

### @<TRIPOS>ATOM

|          |         |         |         |      |          |         |
|----------|---------|---------|---------|------|----------|---------|
| 1 N      | 11.6652 | 7.5313  | -0.0982 | N.3  | 1 MET252 | -0.3667 |
| BACKBONE |         |         |         |      |          |         |
| 2 CA     | 11.2246 | 8.7474  | -0.7746 | C.3  | 1 MET252 | 0.1054  |
| BACKBONE |         |         |         |      |          |         |
| 3 C      | 9.7570  | 9.0082  | -0.5151 | C.2  | 1 MET252 | 0.1983  |
| BACKBONE |         |         |         |      |          |         |
| 4 O      | 9.1136  | 9.6305  | -1.3440 | O.2  | 1 MET252 | -0.3949 |
| BACKBONE |         |         |         |      |          |         |
| 5 CB     | 11.5642 | 8.6122  | -2.2877 | C.3  | 1 MET252 | -0.0086 |
| 6 CG     | 13.0870 | 8.4255  | -2.5200 | C.3  | 1 MET252 | -0.0028 |
| 7 SD     | 14.0054 | 9.8693  | -1.8793 | S.o  | 1 MET252 | -0.1639 |
| 8 CE     | 15.5583 | 9.0734  | -1.3596 | C.3  | 1 MET252 | -0.0181 |
| 9 H      | 11.2133 | 6.6623  | -0.3098 | H    | 1 MET252 | 0.1393  |
| 10 HA    | 11.7422 | 9.6250  | -0.3552 | H    | 1 MET252 | 0.0736  |
| 11 HB3   | 11.2237 | 9.4899  | -2.8543 | H    | 1 MET252 | 0.0316  |
| 12 HB2   | 11.0390 | 7.7317  | -2.6902 | H    | 1 MET252 | 0.0316  |
| 13 HG3   | 13.3049 | 8.3294  | -3.5952 | H    | 1 MET252 | 0.0378  |
| 14 HG2   | 13.4248 | 7.5064  | -2.0174 | H    | 1 MET252 | 0.0378  |
| 15 LPD2  | 14.1116 | 10.3335 | -2.3634 | LP   | 1 MET252 | 0.0000  |
| 16 LPD1  | 13.6843 | 10.1581 | -1.3553 | LP   | 1 MET252 | 0.0000  |
| 17 HE3   | 15.3467 | 8.2724  | -0.6360 | H    | 1 MET252 | 0.0340  |
| 18 NCAP  | 12.4300 | 7.5664  | 0.5488  | H    | 1 MET252 | 0.1393  |
| 19 HE2   | 16.2086 | 9.8168  | -0.8778 | H    | 1 MET252 | 0.0340  |
| 20 HE1   | 16.0693 | 8.6520  | -2.2379 | H    | 1 MET252 | 0.0340  |
| 21 N     | 9.2032  | 8.5581  | 0.6355  | N.am | 2 GLN253 | -0.2640 |
| BACKBONE |         |         |         |      |          |         |
| 22 CA    | 7.7904  | 8.8060  | 0.9206  | C.3  | 2 GLN253 | 0.1330  |
| BACKBONE |         |         |         |      |          |         |
| 23 C     | 7.5985  | 10.1836 | 1.5126  | C.2  | 2 GLN253 | 0.2041  |
| BACKBONE |         |         |         |      |          |         |
| 24 O     | 6.5663  | 10.7752 | 1.2367  | O.2  | 2 GLN253 | -0.3944 |
| BACKBONE |         |         |         |      |          |         |
| 25 CB    | 7.2153  | 7.7573  | 1.9118  | C.3  | 2 GLN253 | 0.0045  |
| 26 CG    | 7.2422  | 6.3281  | 1.3066  | C.3  | 2 GLN253 | 0.0412  |
| 27 CD    | 6.6601  | 5.3341  | 2.2836  | C.2  | 2 GLN253 | 0.1737  |
| 28 OE1   | 5.5461  | 4.8791  | 2.0753  | O.2  | 2 GLN253 | -0.3973 |
| 29 NE2   | 7.3907  | 4.9821  | 3.3646  | N.am | 2 GLN253 | -0.3009 |
| 30 H     | 9.7508  | 8.0885  | 1.3303  | H    | 2 GLN253 | 0.1883  |
| 31 HA    | 7.2014  | 8.7368  | -0.0102 | H    | 2 GLN253 | 0.0801  |
| 32 HB3   | 6.1685  | 8.0155  | 2.1459  | H    | 2 GLN253 | 0.0337  |
| 33 HB2   | 7.7906  | 7.7875  | 2.8513  | H    | 2 GLN253 | 0.0337  |
| 34 HG3   | 8.2747  | 6.0315  | 1.0628  | H    | 2 GLN253 | 0.0504  |

|          |      |         |         |         |       |   |        |         |
|----------|------|---------|---------|---------|-------|---|--------|---------|
| 35       | HG2  | 6.6579  | 6.3110  | 0.3719  | H     | 2 | GLN253 | 0.0504  |
| 36       | HE21 | 8.3046  | 5.3601  | 3.5204  | H     | 2 | GLN253 | 0.1814  |
| 37       | HE22 | 7.0179  | 4.3278  | 4.0247  | H     | 2 | GLN253 | 0.1814  |
| 38       | N    | 8.5479  | 10.7107 | 2.3245  | N.am  | 3 | THR254 | -0.2613 |
| BACKBONE |      |         |         |         |       |   |        |         |
| 39       | CA   | 8.3445  | 12.0156 | 2.9535  | C.3   | 3 | THR254 | 0.1565  |
| BACKBONE |      |         |         |         |       |   |        |         |
| 40       | C    | 8.9416  | 13.1145 | 2.1043  | C.2   | 3 | THR254 | 0.2066  |
| BACKBONE |      |         |         |         |       |   |        |         |
| 41       | O    | 9.8908  | 12.8551 | 1.3834  | O.2   | 3 | THR254 | -0.3943 |
| BACKBONE |      |         |         |         |       |   |        |         |
| 42       | CB   | 9.0031  | 12.0583 | 4.3587  | C.3   | 3 | THR254 | 0.0924  |
| 43       | OG1  | 10.4081 | 11.7935 | 4.2015  | O.3   | 3 | THR254 | -0.3874 |
| 44       | CG2  | 8.3568  | 11.0087 | 5.3028  | C.3   | 3 | THR254 | -0.0346 |
| 45       | H    | 9.4105  | 10.2369 | 2.5096  | H     | 3 | THR254 | 0.1884  |
| 46       | HA   | 7.2668  | 12.2033 | 3.0932  | H     | 3 | THR254 | 0.0826  |
| 47       | HB   | 8.8663  | 13.0667 | 4.7904  | H     | 3 | THR254 | 0.0639  |
| 48       | HG1  | 10.8785 | 11.8135 | 5.0289  | H     | 3 | THR254 | 0.2101  |
| 49       | HG22 | 8.8153  | 11.0653 | 6.3023  | H     | 3 | THR254 | 0.0257  |
| 50       | HG21 | 8.5050  | 9.9919  | 4.9084  | H     | 3 | THR254 | 0.0257  |
| 51       | HG23 | 7.2765  | 11.1944 | 5.4056  | H     | 3 | THR254 | 0.0257  |
| 52       | N    | 8.4010  | 14.3522 | 2.1933  | N.am  | 4 | HIS255 | -0.2618 |
| BACKBONE |      |         |         |         |       |   |        |         |
| 53       | CA   | 8.9623  | 15.4693 | 1.4332  | C.3   | 4 | HIS255 | 0.1421  |
| BACKBONE |      |         |         |         |       |   |        |         |
| 54       | C    | 10.4135 | 15.6666 | 1.8008  | C.2   | 4 | HIS255 | 0.2060  |
| BACKBONE |      |         |         |         |       |   |        |         |
| 55       | O    | 11.2379 | 15.7597 | 0.9053  | O.2   | 4 | HIS255 | -0.3942 |
| BACKBONE |      |         |         |         |       |   |        |         |
| 56       | CB   | 8.1603  | 16.7676 | 1.7196  | C.3   | 4 | HIS255 | 0.0427  |
| 57       | CG   | 8.7863  | 17.9948 | 1.1103  | C.2   | 4 | HIS255 | 0.0561  |
| 58       | ND1  | 9.6125  | 18.7968 | 1.7438  | N.pl3 | 4 | HIS255 | -0.2623 |
| 59       | CD2  | 8.5796  | 18.4422 | -0.1424 | C.2   | 4 | HIS255 | -0.0276 |
| 60       | CE1  | 9.9496  | 19.7753 | 0.9644  | C.2   | 4 | HIS255 | 0.0875  |
| 61       | NE2  | 9.3905  | 19.6296 | -0.1493 | N.2   | 4 | HIS255 | -0.3437 |
| 62       | H    | 7.6174  | 14.5242 | 2.7938  | H     | 4 | HIS255 | 0.1885  |
| 63       | HA   | 8.8929  | 15.2460 | 0.3553  | H     | 4 | HIS255 | 0.0824  |
| 64       | HB3  | 8.0695  | 16.9354 | 2.8040  | H     | 4 | HIS255 | 0.0491  |
| 65       | HB2  | 7.1428  | 16.6465 | 1.3136  | H     | 4 | HIS255 | 0.0491  |
| 66       | HD1  | 9.9343  | 18.6754 | 2.7161  | H     | 4 | HIS255 | 0.2386  |
| 67       | HD2  | 7.9631  | 18.0132 | -0.9258 | H     | 4 | HIS255 | 0.0324  |
| 68       | HE1  | 10.6104 | 20.6024 | 1.2218  | H     | 4 | HIS255 | 0.1149  |
| 69       | N    | 10.7429 | 15.7291 | 3.1108  | N.am  | 5 | ALA256 | -0.2639 |
| BACKBONE |      |         |         |         |       |   |        |         |
| 70       | CA   | 12.1326 | 15.9532 | 3.5073  | C.3   | 5 | ALA256 | 0.1282  |
| BACKBONE |      |         |         |         |       |   |        |         |
| 71       | C    | 13.0481 | 14.9446 | 2.8518  | C.2   | 5 | ALA256 | 0.2036  |
| BACKBONE |      |         |         |         |       |   |        |         |
| 72       | O    | 14.0921 | 15.3324 | 2.3510  | O.2   | 5 | ALA256 | -0.3944 |
| BACKBONE |      |         |         |         |       |   |        |         |
| 73       | CB   | 12.3085 | 15.8490 | 5.0447  | C.3   | 5 | ALA256 | -0.0244 |
| 74       | H    | 10.0423 | 15.6441 | 3.8223  | H     | 5 | ALA256 | 0.1883  |

|          |      |         |         |         |       |   |        |         |
|----------|------|---------|---------|---------|-------|---|--------|---------|
| 75       | HA   | 12.4180 | 16.9714 | 3.1904  | H     | 5 | ALA256 | 0.0797  |
| 76       | HB3  | 12.0095 | 14.8499 | 5.3978  | H     | 5 | ALA256 | 0.0277  |
| 77       | HB2  | 11.6844 | 16.6032 | 5.5493  | H     | 5 | ALA256 | 0.0277  |
| 78       | HB1  | 13.3607 | 16.0217 | 5.3211  | H     | 5 | ALA256 | 0.0277  |
| 79       | N    | 12.6763 | 13.6444 | 2.8382  | N.am  | 6 | ALA257 | -0.2640 |
| BACKBONE |      |         |         |         |       |   |        |         |
| 80       | CA   | 13.5412 | 12.6532 | 2.2013  | C.3   | 6 | ALA257 | 0.1282  |
| BACKBONE |      |         |         |         |       |   |        |         |
| 81       | C    | 13.7582 | 13.0150 | 0.7517  | C.2   | 6 | ALA257 | 0.2036  |
| BACKBONE |      |         |         |         |       |   |        |         |
| 82       | O    | 14.8797 | 12.9361 | 0.2739  | O.2   | 6 | ALA257 | -0.3944 |
| BACKBONE |      |         |         |         |       |   |        |         |
| 83       | CB   | 12.9542 | 11.2198 | 2.2758  | C.3   | 6 | ALA257 | -0.0244 |
| 84       | H    | 11.8121 | 13.3465 | 3.2470  | H     | 6 | ALA257 | 0.1883  |
| 85       | HA   | 14.5093 | 12.6617 | 2.7228  | H     | 6 | ALA257 | 0.0797  |
| 86       | HB3  | 11.9674 | 11.1807 | 1.7904  | H     | 6 | ALA257 | 0.0277  |
| 87       | HB2  | 12.8455 | 10.9111 | 3.3268  | H     | 6 | ALA257 | 0.0277  |
| 88       | HB1  | 13.6243 | 10.5071 | 1.7692  | H     | 6 | ALA257 | 0.0277  |
| 89       | N    | 12.6816 | 13.4179 | 0.0418  | N.am  | 7 | ARG258 | -0.2637 |
| BACKBONE |      |         |         |         |       |   |        |         |
| 90       | CA   | 12.8268 | 13.7611 | -1.3693 | C.3   | 7 | ARG258 | 0.1311  |
| BACKBONE |      |         |         |         |       |   |        |         |
| 91       | C    | 13.6690 | 15.0087 | -1.5273 | C.2   | 7 | ARG258 | 0.2039  |
| BACKBONE |      |         |         |         |       |   |        |         |
| 92       | O    | 14.3601 | 15.1042 | -2.5277 | O.2   | 7 | ARG258 | -0.3944 |
| BACKBONE |      |         |         |         |       |   |        |         |
| 93       | CB   | 11.4461 | 13.9106 | -2.0685 | C.3   | 7 | ARG258 | -0.0092 |
| 94       | CG   | 10.6470 | 12.5765 | -2.0279 | C.3   | 7 | ARG258 | -0.0156 |
| 95       | CD   | 9.3702  | 12.6195 | -2.9074 | C.3   | 7 | ARG258 | 0.0627  |
| 96       | NE   | 8.4412  | 13.6549 | -2.4476 | N.pl3 | 7 | ARG258 | -0.2723 |
| 97       | CZ   | 7.5701  | 13.4984 | -1.4711 | C.cat | 7 | ARG258 | 0.2882  |
| 98       | NH1  | 7.4601  | 12.3964 | -0.7657 | N.pl3 | 7 | ARG258 | -0.2849 |
| 99       | NH2  | 6.7637  | 14.4963 | -1.1824 | N.pl3 | 7 | ARG258 | -0.2849 |
| 100      | H    | 11.7845 | 13.5125 | 0.4769  | H     | 7 | ARG258 | 0.1883  |
| 101      | HA   | 13.3659 | 12.9381 | -1.8703 | H     | 7 | ARG258 | 0.0800  |
| 102      | HB3  | 11.6237 | 14.2009 | -3.1162 | H     | 7 | ARG258 | 0.0313  |
| 103      | HB2  | 10.8632 | 14.7080 | -1.5842 | H     | 7 | ARG258 | 0.0313  |
| 104      | HG3  | 10.3608 | 12.3238 | -0.9999 | H     | 7 | ARG258 | 0.0301  |
| 105      | HG2  | 11.2996 | 11.7712 | -2.3863 | H     | 7 | ARG258 | 0.0301  |
| 106      | HD3  | 8.8996  | 11.6309 | -2.9824 | H     | 7 | ARG258 | 0.0689  |
| 107      | HD2  | 9.6771  | 12.8516 | -3.9362 | H     | 7 | ARG258 | 0.0689  |
| 108      | HE   | 8.4592  | 14.5504 | -2.9590 | H     | 7 | ARG258 | 0.2642  |
| 109      | HH11 | 8.0629  | 11.5821 | -0.9271 | H     | 7 | ARG258 | 0.2615  |
| 110      | HH12 | 6.7564  | 12.3207 | -0.0164 | H     | 7 | ARG258 | 0.2615  |
| 111      | HH21 | 6.8057  | 15.3862 | -1.7014 | H     | 7 | ARG258 | 0.2615  |
| 112      | HH22 | 6.0668  | 14.4182 | -0.4263 | H     | 7 | ARG258 | 0.2615  |
| 113      | N    | 13.6570 | 15.9722 | -0.5768 | N.am  | 8 | MET259 | -0.2637 |
| BACKBONE |      |         |         |         |       |   |        |         |
| 114      | CA   | 14.5256 | 17.1427 | -0.7184 | C.3   | 8 | MET259 | 0.1317  |
| BACKBONE |      |         |         |         |       |   |        |         |
| 115      | C    | 15.9821 | 16.7275 | -0.7511 | C.2   | 8 | MET259 | 0.2039  |
| BACKBONE |      |         |         |         |       |   |        |         |

|          |         |         |              |           |         |
|----------|---------|---------|--------------|-----------|---------|
| 116 O    | 16.7231 | 17.2572 | -1.5649 O.2  | 8 MET259  | -0.3944 |
| BACKBONE |         |         |              |           |         |
| 117 CB   | 14.3594 | 18.1902 | 0.4177 C.3   | 8 MET259  | -0.0034 |
| 118 CG   | 12.9663 | 18.8749 | 0.4231 C.3   | 8 MET259  | -0.0024 |
| 119 SD   | 12.5778 | 19.7659 | -1.1252 S.o  | 8 MET259  | -0.1639 |
| 120 CE   | 13.8417 | 21.0729 | -1.1798 C.3  | 8 MET259  | -0.0181 |
| 121 H    | 13.0821 | 15.8904 | 0.2371 H     | 8 MET259  | 0.1883  |
| 122 HA   | 14.2799 | 17.6490 | -1.6618 H    | 8 MET259  | 0.0800  |
| 123 HB3  | 15.1296 | 18.9708 | 0.3099 H     | 8 MET259  | 0.0320  |
| 124 HB2  | 14.5242 | 17.6981 | 1.3891 H     | 8 MET259  | 0.0320  |
| 125 HG3  | 12.9192 | 19.5919 | 1.2573 H     | 8 MET259  | 0.0378  |
| 126 HG2  | 12.1753 | 18.1270 | 0.5698 H     | 8 MET259  | 0.0378  |
| 127 LPD2 | 12.6297 | 19.3542 | -1.6626 LP   | 8 MET259  | 0.0000  |
| 128 LPD1 | 11.9534 | 20.0316 | -1.1032 LP   | 8 MET259  | 0.0000  |
| 129 HE3  | 13.9372 | 21.5500 | -0.1935 H    | 8 MET259  | 0.0340  |
| 130 HE2  | 13.5364 | 21.8296 | -1.9168 H    | 8 MET259  | 0.0340  |
| 131 HE1  | 14.8095 | 20.6479 | -1.4839 H    | 8 MET259  | 0.0340  |
| 132 N    | 16.4183 | 15.7988 | 0.1326 N.am  | 9 ARG260  | -0.2637 |
| BACKBONE |         |         |              |           |         |
| 133 CA   | 17.8482 | 15.4912 | 0.2263 C.3   | 9 ARG260  | 0.1311  |
| BACKBONE |         |         |              |           |         |
| 134 C    | 18.4416 | 15.0970 | -1.1107 C.2  | 9 ARG260  | 0.2040  |
| BACKBONE |         |         |              |           |         |
| 135 O    | 19.5854 | 15.4292 | -1.3782 O.2  | 9 ARG260  | -0.3944 |
| BACKBONE |         |         |              |           |         |
| 136 CB   | 18.1941 | 14.3379 | 1.2135 C.3   | 9 ARG260  | -0.0092 |
| 137 CG   | 17.6466 | 14.5513 | 2.6537 C.3   | 9 ARG260  | -0.0156 |
| 138 CD   | 18.4513 | 13.7281 | 3.6982 C.3   | 9 ARG260  | 0.0627  |
| 139 NE   | 17.7362 | 13.7119 | 4.9791 N.pl3 | 9 ARG260  | -0.2723 |
| 140 CZ   | 16.7713 | 12.8651 | 5.2824 C.cat | 9 ARG260  | 0.2882  |
| 141 NH1  | 16.3242 | 11.9442 | 4.4578 N.pl3 | 9 ARG260  | -0.2849 |
| 142 NH2  | 16.2204 | 12.9422 | 6.4738 N.pl3 | 9 ARG260  | -0.2849 |
| 143 H    | 15.7787 | 15.3582 | 0.7631 H     | 9 ARG260  | 0.1883  |
| 144 HA   | 18.3502 | 16.4080 | 0.5791 H     | 9 ARG260  | 0.0800  |
| 145 HB3  | 19.2941 | 14.2643 | 1.2572 H     | 9 ARG260  | 0.0313  |
| 146 HB2  | 17.8071 | 13.3814 | 0.8236 H     | 9 ARG260  | 0.0313  |
| 147 HG3  | 16.5900 | 14.2459 | 2.6987 H     | 9 ARG260  | 0.0301  |
| 148 HG2  | 17.7009 | 15.6172 | 2.9317 H     | 9 ARG260  | 0.0301  |
| 149 HD3  | 19.4234 | 14.2320 | 3.8408 H     | 9 ARG260  | 0.0689  |
| 150 HD2  | 18.7035 | 12.7182 | 3.3409 H     | 9 ARG260  | 0.0689  |
| 151 HE   | 18.0356 | 14.4040 | 5.6862 H     | 9 ARG260  | 0.2642  |
| 152 HH11 | 16.6979 | 11.8352 | 3.5085 H     | 9 ARG260  | 0.2615  |
| 153 HH12 | 15.5700 | 11.3006 | 4.7424 H     | 9 ARG260  | 0.2615  |
| 154 HH21 | 16.5293 | 13.6455 | 7.1616 H     | 9 ARG260  | 0.2615  |
| 155 HH22 | 15.4618 | 12.3018 | 6.7540 H     | 9 ARG260  | 0.2615  |
| 156 N    | 17.6869 | 14.3697 | -1.9613 N.am | 10 THR261 | -0.2613 |
| BACKBONE |         |         |              |           |         |
| 157 CA   | 18.2464 | 13.9120 | -3.2345 C.3  | 10 THR261 | 0.1565  |
| BACKBONE |         |         |              |           |         |
| 158 C    | 18.5724 | 15.0943 | -4.1230 C.2  | 10 THR261 | 0.2066  |
| BACKBONE |         |         |              |           |         |

|          |         |         |         |      |    |        |         |
|----------|---------|---------|---------|------|----|--------|---------|
| 159 O    | 19.6145 | 15.0895 | -4.7595 | O.2  | 10 | THR261 | -0.3943 |
| BACKBONE |         |         |         |      |    |        |         |
| 160 CB   | 17.2085 | 13.0206 | -3.9625 | C.3  | 10 | THR261 | 0.0924  |
| 161 OG1  | 16.0076 | 13.8042 | -3.9880 | O.3  | 10 | THR261 | -0.3874 |
| 162 CG2  | 16.9806 | 11.6733 | -3.2251 | C.3  | 10 | THR261 | -0.0346 |
| 163 H    | 16.7370 | 14.1465 | -1.7341 | H    | 10 | THR261 | 0.1884  |
| 164 HA   | 19.1625 | 13.3275 | -3.0472 | H    | 10 | THR261 | 0.0826  |
| 165 HB   | 17.5501 | 12.7994 | -4.9873 | H    | 10 | THR261 | 0.0639  |
| 166 HG1  | 15.2622 | 13.3290 | -4.3275 | H    | 10 | THR261 | 0.2101  |
| 167 HG22 | 16.2672 | 11.0519 | -3.7879 | H    | 10 | THR261 | 0.0257  |
| 168 HG21 | 16.5720 | 11.8432 | -2.2193 | H    | 10 | THR261 | 0.0257  |
| 169 HG23 | 17.9266 | 11.1182 | -3.1349 | H    | 10 | THR261 | 0.0257  |
| 170 N    | 17.6921 | 16.1203 | -4.1771 | N.am | 11 | PHE262 | -0.2619 |
| BACKBONE |         |         |         |      |    |        |         |
| 171 CA   | 17.9313 | 17.2647 | -5.0608 | C.3  | 11 | PHE262 | 0.1404  |
| BACKBONE |         |         |         |      |    |        |         |
| 172 C    | 19.1525 | 18.1074 | -4.7302 | C.2  | 11 | PHE262 | 0.2060  |
| BACKBONE |         |         |         |      |    |        |         |
| 173 O    | 19.3735 | 19.0576 | -5.4652 | O.2  | 11 | PHE262 | -0.3942 |
| BACKBONE |         |         |         |      |    |        |         |
| 174 CB   | 16.6954 | 18.2066 | -5.0590 | C.3  | 11 | PHE262 | 0.0214  |
| 175 CG   | 15.4714 | 17.5790 | -5.7470 | C.ar | 11 | PHE262 | -0.0386 |
| 176 CD1  | 15.4054 | 17.5054 | -7.1420 | C.ar | 11 | PHE262 | -0.0601 |
| 177 CD2  | 14.3984 | 17.0822 | -5.0013 | C.ar | 11 | PHE262 | -0.0601 |
| 178 CE1  | 14.3638 | 16.8177 | -7.7713 | C.ar | 11 | PHE262 | -0.0686 |
| 179 CE2  | 13.3297 | 16.4348 | -5.6254 | C.ar | 11 | PHE262 | -0.0686 |
| 180 CZ   | 13.3335 | 16.2581 | -7.0110 | C.ar | 11 | PHE262 | -0.0687 |
| 181 H    | 16.8518 | 16.0935 | -3.6322 | H    | 11 | PHE262 | 0.1885  |
| 182 HA   | 18.0760 | 16.8919 | -6.0885 | H    | 11 | PHE262 | 0.0823  |
| 183 HB3  | 16.9322 | 19.1241 | -5.6080 | H    | 11 | PHE262 | 0.0474  |
| 184 HB2  | 16.4729 | 18.4986 | -4.0205 | H    | 11 | PHE262 | 0.0474  |
| 185 HD1  | 16.1694 | 17.9741 | -7.7482 | H    | 11 | PHE262 | 0.0557  |
| 186 HD2  | 14.3905 | 17.2027 | -3.9288 | H    | 11 | PHE262 | 0.0557  |
| 187 HE1  | 14.3643 | 16.7152 | -8.8497 | H    | 11 | PHE262 | 0.0599  |
| 188 HE2  | 12.5000 | 16.0693 | -5.0296 | H    | 11 | PHE262 | 0.0599  |
| 189 HZ   | 12.5456 | 15.6893 | -7.4942 | H    | 11 | PHE262 | 0.0559  |
| 190 N    | 19.9613 | 17.8374 | -3.6772 | N.am | 12 | MET263 | -0.2636 |
| BACKBONE |         |         |         |      |    |        |         |
| 191 CA   | 21.1045 | 18.7100 | -3.3814 | C.3  | 12 | MET263 | 0.1317  |
| BACKBONE |         |         |         |      |    |        |         |
| 192 C    | 21.8724 | 19.1154 | -4.6246 | C.2  | 12 | MET263 | 0.2040  |
| BACKBONE |         |         |         |      |    |        |         |
| 193 O    | 22.2678 | 20.2692 | -4.6925 | O.2  | 12 | MET263 | -0.3944 |
| BACKBONE |         |         |         |      |    |        |         |
| 194 CB   | 22.0994 | 18.0592 | -2.3787 | C.3  | 12 | MET263 | -0.0034 |
| 195 CG   | 21.5617 | 18.0985 | -0.9231 | C.3  | 12 | MET263 | -0.0024 |
| 196 SD   | 22.6835 | 17.1440 | 0.1498  | S.o  | 12 | MET263 | -0.1639 |
| 197 CE   | 21.6942 | 17.0930 | 1.6766  | C.3  | 12 | MET263 | -0.0181 |
| 198 H    | 19.7697 | 17.0774 | -3.0581 | H    | 12 | MET263 | 0.1883  |
| 199 HA   | 20.7031 | 19.6306 | -2.9248 | H    | 12 | MET263 | 0.0800  |
| 200 HB3  | 23.0599 | 18.6023 | -2.3911 | H    | 12 | MET263 | 0.0320  |
| 201 HB2  | 22.2909 | 17.0205 | -2.6919 | H    | 12 | MET263 | 0.0320  |

|          |      |         |         |          |       |    |        |         |
|----------|------|---------|---------|----------|-------|----|--------|---------|
| 202      | HG3  | 20.5543 | 17.6676 | -0.8552  | H     | 12 | MET263 | 0.0378  |
| 203      | HG2  | 21.5181 | 19.1358 | -0.5548  | H     | 12 | MET263 | 0.0378  |
| 204      | LPD2 | 22.7989 | 16.5218 | -0.0965  | LP    | 12 | MET263 | 0.0000  |
| 205      | LPD1 | 23.2752 | 17.4636 | 0.2436   | LP    | 12 | MET263 | 0.0000  |
| 206      | HE3  | 21.4177 | 18.1131 | 1.9818   | H     | 12 | MET263 | 0.0340  |
| 207      | HE2  | 22.2861 | 16.6220 | 2.4748   | H     | 12 | MET263 | 0.0340  |
| 208      | HE1  | 20.7831 | 16.5012 | 1.5065   | H     | 12 | MET263 | 0.0340  |
| 209      | N    | 22.0861 | 18.2070 | -5.6079  | N.am  | 13 | TYR264 | -0.2621 |
| BACKBONE |      |         |         |          |       |    |        |         |
| 210      | CA   | 22.7944 | 18.5779 | -6.8367  | C.3   | 13 | TYR264 | 0.1390  |
| BACKBONE |      |         |         |          |       |    |        |         |
| 211      | C    | 21.8334 | 18.6048 | -8.0035  | C.2   | 13 | TYR264 | 0.2058  |
| BACKBONE |      |         |         |          |       |    |        |         |
| 212      | O    | 22.0937 | 17.9907 | -9.0259  | O.2   | 13 | TYR264 | -0.3942 |
| BACKBONE |      |         |         |          |       |    |        |         |
| 213      | CB   | 24.0087 | 17.6366 | -7.0401  | C.3   | 13 | TYR264 | 0.0163  |
| 214      | CG   | 24.9893 | 17.8783 | -5.8830  | C.ar  | 13 | TYR264 | -0.0493 |
| 215      | CD1  | 26.0136 | 18.8232 | -6.0129  | C.ar  | 13 | TYR264 | -0.0685 |
| 216      | CD2  | 24.8630 | 17.1688 | -4.6841  | C.ar  | 13 | TYR264 | -0.0685 |
| 217      | CE1  | 26.8897 | 19.0715 | -4.9522  | C.ar  | 13 | TYR264 | -0.0398 |
| 218      | CE2  | 25.7285 | 17.4280 | -3.6175  | C.ar  | 13 | TYR264 | -0.0398 |
| 219      | CZ   | 26.7459 | 18.3779 | -3.7439  | C.ar  | 13 | TYR264 | 0.0805  |
| 220      | OH   | 27.5993 | 18.6155 | -2.6611  | O.3   | 13 | TYR264 | -0.3376 |
| 221      | H    | 21.7445 | 17.2682 | -5.5287  | H     | 13 | TYR264 | 0.1885  |
| 222      | HA   | 23.2050 | 19.6004 | -6.7925  | H     | 13 | TYR264 | 0.0821  |
| 223      | HB2  | 24.5061 | 17.8518 | -7.9998  | H     | 13 | TYR264 | 0.0453  |
| 224      | HB3  | 23.6779 | 16.5863 | -7.0611  | H     | 13 | TYR264 | 0.0453  |
| 225      | HD1  | 26.1325 | 19.3746 | -6.9405  | H     | 13 | TYR264 | 0.0530  |
| 226      | HD2  | 24.0902 | 16.4152 | -4.5748  | H     | 13 | TYR264 | 0.0530  |
| 227      | HE1  | 27.6788 | 19.8067 | -5.0768  | H     | 13 | TYR264 | 0.0525  |
| 228      | HE2  | 25.6116 | 16.8889 | -2.6829  | H     | 13 | TYR264 | 0.0525  |
| 229      | HH   | 28.2655 | 19.2739 | -2.8239  | H     | 13 | TYR264 | 0.2458  |
| 230      | N    | 20.7168 | 19.3542 | -7.8576  | N.am  | 14 | TRP265 | -0.2625 |
| BACKBONE |      |         |         |          |       |    |        |         |
| 231      | CA   | 19.8119 | 19.5720 | -8.9864  | C.3   | 14 | TRP265 | 0.1354  |
| BACKBONE |      |         |         |          |       |    |        |         |
| 232      | C    | 20.5105 | 20.5644 | -9.8871  | C.2   | 14 | TRP265 | 0.2077  |
| BACKBONE |      |         |         |          |       |    |        |         |
| 233      | O    | 20.8260 | 21.6153 | -9.3506  | O.2   | 14 | TRP265 | -0.3940 |
| BACKBONE |      |         |         |          |       |    |        |         |
| 234      | CB   | 18.4802 | 20.1846 | -8.4786  | C.3   | 14 | TRP265 | 0.0042  |
| 235      | CG   | 17.4671 | 20.4866 | -9.5528  | C.2   | 14 | TRP265 | -0.0418 |
| 236      | CD1  | 17.0214 | 21.7018 | -9.9128  | C.2   | 14 | TRP265 | 0.0167  |
| 237      | CD2  | 16.7351 | 19.4834 | -10.4098 | C.ar  | 14 | TRP265 | -0.0214 |
| 238      | NE1  | 16.0982 | 21.5766 | -10.8312 | N.pl3 | 14 | TRP265 | -0.2890 |
| 239      | CE2  | 15.8755 | 20.2853 | -11.1376 | C.ar  | 14 | TRP265 | 0.0603  |
| 240      | CE3  | 16.7662 | 18.1000 | -10.5742 | C.ar  | 14 | TRP265 | -0.0747 |
| 241      | CZ2  | 14.9429 | 19.7497 | -12.0247 | C.ar  | 14 | TRP265 | -0.0443 |
| 242      | CZ3  | 15.8786 | 17.5562 | -11.5121 | C.ar  | 14 | TRP265 | -0.0792 |
| 243      | CH2  | 14.9521 | 18.3594 | -12.1936 | C.ar  | 14 | TRP265 | -0.0768 |
| 244      | H    | 20.5437 | 19.8400 | -6.9980  | H     | 14 | TRP265 | 0.1884  |
| 245      | HA   | 19.5750 | 18.6109 | -9.4622  | H     | 14 | TRP265 | 0.0815  |

|          |     |         |         |          |      |    |        |         |
|----------|-----|---------|---------|----------|------|----|--------|---------|
| 246      | HB3 | 18.6850 | 21.1119 | -7.9199  | H    | 14 | TRP265 | 0.0397  |
| 247      | HB2 | 18.0268 | 19.4720 | -7.7786  | H    | 14 | TRP265 | 0.0397  |
| 248      | HD1 | 17.3674 | 22.6463 | -9.4961  | H    | 14 | TRP265 | 0.0795  |
| 249      | HE1 | 15.5941 | 22.3674 | -11.2580 | H    | 14 | TRP265 | 0.2216  |
| 250      | HE3 | 17.4459 | 17.4782 | -10.0042 | H    | 14 | TRP265 | 0.0540  |
| 251      | HZ2 | 14.2390 | 20.3837 | -12.5513 | H    | 14 | TRP265 | 0.0541  |
| 252      | HZ3 | 15.9066 | 16.4949 | -11.7216 | H    | 14 | TRP265 | 0.0510  |
| 253      | HH2 | 14.2327 | 17.8981 | -12.8620 | H    | 14 | TRP265 | 0.0530  |
| 254      | N   | 20.8012 | 20.3446 | -11.1963 | N.am | 15 | PRO266 | -0.2497 |
| BACKBONE |     |         |         |          |      |    |        |         |
| 255      | CA  | 21.4927 | 21.3780 | -11.9549 | C.3  | 15 | PRO266 | 0.1338  |
| BACKBONE |     |         |         |          |      |    |        |         |
| 256      | C   | 20.8387 | 22.7383 | -11.8403 | C.2  | 15 | PRO266 | 0.2042  |
| BACKBONE |     |         |         |          |      |    |        |         |
| 257      | O   | 19.6285 | 22.7976 | -11.6869 | O.2  | 15 | PRO266 | -0.3944 |
| BACKBONE |     |         |         |          |      |    |        |         |
| 258      | CB  | 21.4133 | 20.7916 | -13.3814 | C.3  | 15 | PRO266 | -0.0104 |
| 259      | CG  | 21.3915 | 19.2661 | -13.1402 | C.3  | 15 | PRO266 | -0.0281 |
| 260      | CD  | 20.4902 | 19.1004 | -11.8905 | C.3  | 15 | PRO266 | 0.0369  |
| 261      | HA  | 22.5406 | 21.3949 | -11.6122 | H    | 15 | PRO266 | 0.0802  |
| 262      | HB3 | 22.2348 | 21.1265 | -14.0354 | H    | 15 | PRO266 | 0.0313  |
| 263      | HB2 | 20.4557 | 21.0716 | -13.8389 | H    | 15 | PRO266 | 0.0313  |
| 264      | HG2 | 21.0315 | 18.7051 | -14.0169 | H    | 15 | PRO266 | 0.0287  |
| 265      | HG3 | 22.4173 | 18.9359 | -12.9031 | H    | 15 | PRO266 | 0.0287  |
| 266      | HD2 | 19.4214 | 19.0759 | -12.1586 | H    | 15 | PRO266 | 0.0524  |
| 267      | HD3 | 20.7747 | 18.1817 | -11.3553 | H    | 15 | PRO266 | 0.0524  |
| 268      | N   | 21.6310 | 23.8344 | -11.8897 | N.am | 16 | SER267 | -0.2616 |
| BACKBONE |     |         |         |          |      |    |        |         |
| 269      | CA  | 21.0763 | 25.1648 | -11.6382 | C.3  | 16 | SER267 | 0.1539  |
| BACKBONE |     |         |         |          |      |    |        |         |
| 270      | C   | 20.2920 | 25.7065 | -12.8111 | C.2  | 16 | SER267 | 0.2062  |
| BACKBONE |     |         |         |          |      |    |        |         |
| 271      | O   | 19.3335 | 26.4276 | -12.5799 | O.2  | 16 | SER267 | -0.3943 |
| BACKBONE |     |         |         |          |      |    |        |         |
| 272      | CB  | 22.2180 | 26.1665 | -11.3262 | C.3  | 16 | SER267 | 0.0843  |
| 273      | OG  | 22.9873 | 25.6541 | -10.2249 | O.3  | 16 | SER267 | -0.3903 |
| 274      | H   | 22.6140 | 23.7518 | -12.0689 | H    | 16 | SER267 | 0.1884  |
| 275      | HA  | 20.4247 | 25.1165 | -10.7487 | H    | 16 | SER267 | 0.0823  |
| 276      | HB3 | 21.7916 | 27.1511 | -11.0676 | H    | 16 | SER267 | 0.0606  |
| 277      | HB2 | 22.8613 | 26.2822 | -12.2153 | H    | 16 | SER267 | 0.0606  |
| 278      | HG  | 23.7105 | 26.2255 | -9.9860  | H    | 16 | SER267 | 0.2097  |
| 279      | N   | 20.6750 | 25.3949 | -14.0721 | N.am | 17 | SER268 | -0.2615 |
| BACKBONE |     |         |         |          |      |    |        |         |
| 280      | CA  | 20.0292 | 26.0343 | -15.2221 | C.3  | 17 | SER268 | 0.1539  |
| BACKBONE |     |         |         |          |      |    |        |         |
| 281      | C   | 18.7155 | 25.3963 | -15.6286 | C.2  | 17 | SER268 | 0.2062  |
| BACKBONE |     |         |         |          |      |    |        |         |
| 282      | O   | 18.3453 | 25.5533 | -16.7821 | O.2  | 17 | SER268 | -0.3943 |
| BACKBONE |     |         |         |          |      |    |        |         |
| 283      | CB  | 21.0159 | 26.0136 | -16.4208 | C.3  | 17 | SER268 | 0.0843  |
| 284      | OG  | 21.2370 | 24.6398 | -16.7866 | O.3  | 17 | SER268 | -0.3903 |
| 285      | H   | 21.4210 | 24.7475 | -14.2420 | H    | 17 | SER268 | 0.1884  |



|          |      |         |         |          |      |    |        |         |
|----------|------|---------|---------|----------|------|----|--------|---------|
| 286      | HA   | 19.8224 | 27.0927 | -14.9896 | H    | 17 | SER268 | 0.0823  |
| 287      | HB3  | 21.9675 | 26.4830 | -16.1191 | H    | 17 | SER268 | 0.0606  |
| 288      | HB2  | 20.6065 | 26.5776 | -17.2764 | H    | 17 | SER268 | 0.0606  |
| 289      | HG   | 21.8404 | 24.5454 | -17.5170 | H    | 17 | SER268 | 0.2097  |
| 290      | N    | 17.9864 | 24.6863 | -14.7342 | N.am | 18 | VAL269 | -0.2634 |
| BACKBONE |      |         |         |          |      |    |        |         |
| 291      | CA   | 16.7209 | 24.0658 | -15.1263 | C.3  | 18 | VAL269 | 0.1334  |
| BACKBONE |      |         |         |          |      |    |        |         |
| 292      | C    | 15.6275 | 24.9816 | -14.6124 | C.2  | 18 | VAL269 | 0.2066  |
| BACKBONE |      |         |         |          |      |    |        |         |
| 293      | O    | 15.6451 | 25.1989 | -13.4112 | O.2  | 18 | VAL269 | -0.3942 |
| BACKBONE |      |         |         |          |      |    |        |         |
| 294      | CB   | 16.6204 | 22.6397 | -14.5157 | C.3  | 18 | VAL269 | -0.0062 |
| 295      | CG1  | 15.2916 | 21.9585 | -14.9340 | C.3  | 18 | VAL269 | -0.0584 |
| 296      | CG2  | 17.8187 | 21.7703 | -14.9831 | C.3  | 18 | VAL269 | -0.0584 |
| 297      | H    | 18.2635 | 24.5879 | -13.7788 | H    | 18 | VAL269 | 0.1883  |
| 298      | HA   | 16.6868 | 23.9029 | -16.2120 | H    | 18 | VAL269 | 0.0803  |
| 299      | HB   | 16.6641 | 22.7161 | -13.4164 | H    | 18 | VAL269 | 0.0343  |
| 300      | HG13 | 14.4332 | 22.4567 | -14.4617 | H    | 18 | VAL269 | 0.0234  |
| 301      | HG12 | 15.2913 | 20.9010 | -14.6367 | H    | 18 | VAL269 | 0.0234  |
| 302      | HG11 | 15.1772 | 22.0063 | -16.0270 | H    | 18 | VAL269 | 0.0234  |
| 303      | HG23 | 17.7210 | 21.5062 | -16.0475 | H    | 18 | VAL269 | 0.0234  |
| 304      | HG22 | 17.8632 | 20.8451 | -14.3877 | H    | 18 | VAL269 | 0.0234  |
| 305      | HG21 | 18.7637 | 22.3142 | -14.8507 | H    | 18 | VAL269 | 0.0234  |
| 306      | N    | 14.6857 | 25.5586 | -15.4063 | N.am | 19 | PRO270 | -0.2498 |
| BACKBONE |      |         |         |          |      |    |        |         |
| 307      | CA   | 13.7129 | 26.4780 | -14.8295 | C.3  | 19 | PRO270 | 0.1338  |
| BACKBONE |      |         |         |          |      |    |        |         |
| 308      | C    | 12.9973 | 25.9759 | -13.5947 | C.2  | 19 | PRO270 | 0.2041  |
| BACKBONE |      |         |         |          |      |    |        |         |
| 309      | O    | 12.8776 | 26.7333 | -12.6438 | O.2  | 19 | PRO270 | -0.3944 |
| BACKBONE |      |         |         |          |      |    |        |         |
| 310      | CB   | 12.7289 | 26.6273 | -16.0149 | C.3  | 19 | PRO270 | -0.0104 |
| 311      | CG   | 13.6306 | 26.4601 | -17.2582 | C.3  | 19 | PRO270 | -0.0281 |
| 312      | CD   | 14.6157 | 25.3362 | -16.8489 | C.3  | 19 | PRO270 | 0.0369  |
| 313      | HA   | 14.2220 | 27.4371 | -14.6332 | H    | 19 | PRO270 | 0.0802  |
| 314      | HB3  | 12.1963 | 27.5923 | -15.9926 | H    | 19 | PRO270 | 0.0313  |
| 315      | HB2  | 11.9914 | 25.8061 | -16.0148 | H    | 19 | PRO270 | 0.0313  |
| 316      | HG2  | 13.0699 | 26.2210 | -18.1780 | H    | 19 | PRO270 | 0.0287  |
| 317      | HG3  | 14.1874 | 27.4010 | -17.4119 | H    | 19 | PRO270 | 0.0287  |
| 318      | HD2  | 14.1936 | 24.3373 | -17.0520 | H    | 19 | PRO270 | 0.0524  |
| 319      | HD3  | 15.5678 | 25.4791 | -17.3857 | H    | 19 | PRO270 | 0.0524  |
| 320      | N    | 12.5108 | 24.7120 | -13.6004 | N.am | 20 | VAL271 | -0.2635 |
| BACKBONE |      |         |         |          |      |    |        |         |
| 321      | CA   | 11.7904 | 24.1926 | -12.4368 | C.3  | 20 | VAL271 | 0.1332  |
| BACKBONE |      |         |         |          |      |    |        |         |
| 322      | C    | 12.8041 | 23.8478 | -11.3650 | C.2  | 20 | VAL271 | 0.2042  |
| BACKBONE |      |         |         |          |      |    |        |         |
| 323      | O    | 13.9259 | 23.5330 | -11.7322 | O.2  | 20 | VAL271 | -0.3944 |
| BACKBONE |      |         |         |          |      |    |        |         |
| 324      | CB   | 10.8876 | 22.9909 | -12.8448 | C.3  | 20 | VAL271 | -0.0063 |
| 325      | CG1  | 10.2210 | 22.3243 | -11.6148 | C.3  | 20 | VAL271 | -0.0584 |

|          |      |         |         |          |      |    |        |         |
|----------|------|---------|---------|----------|------|----|--------|---------|
| 326      | CG2  | 9.7865  | 23.4545 | -13.8422 | C.3  | 20 | VAL271 | -0.0584 |
| 327      | H    | 12.6692 | 24.1114 | -14.3866 | H    | 20 | VAL271 | 0.1883  |
| 328      | HA   | 11.1270 | 24.9818 | -12.0436 | H    | 20 | VAL271 | 0.0802  |
| 329      | HB   | 11.5179 | 22.2253 | -13.3330 | H    | 20 | VAL271 | 0.0343  |
| 330      | HG13 | 10.9819 | 21.9627 | -10.9120 | H    | 20 | VAL271 | 0.0234  |
| 331      | HG12 | 9.6344  | 21.4592 | -11.9502 | H    | 20 | VAL271 | 0.0234  |
| 332      | HG11 | 9.5537  | 23.0266 | -11.0932 | H    | 20 | VAL271 | 0.0234  |
| 333      | HG23 | 9.1725  | 24.2527 | -13.3977 | H    | 20 | VAL271 | 0.0234  |
| 334      | HG22 | 9.1205  | 22.6164 | -14.0915 | H    | 20 | VAL271 | 0.0234  |
| 335      | HG21 | 10.2279 | 23.8334 | -14.7767 | H    | 20 | VAL271 | 0.0234  |
| 336      | N    | 12.4341 | 23.9262 | -10.0574 | N.am | 21 | GLN272 | -0.2636 |
| BACKBONE |      |         |         |          |      |    |        |         |
| 337      | CA   | 13.4103 | 23.7790 | -8.9732  | C.3  | 21 | GLN272 | 0.1332  |
| BACKBONE |      |         |         |          |      |    |        |         |
| 338      | C    | 12.9482 | 22.7772 | -7.9310  | C.2  | 21 | GLN272 | 0.2065  |
| BACKBONE |      |         |         |          |      |    |        |         |
| 339      | O    | 11.8011 | 22.3686 | -8.0244  | O.2  | 21 | GLN272 | -0.3942 |
| BACKBONE |      |         |         |          |      |    |        |         |
| 340      | CB   | 13.6584 | 25.2076 | -8.4085  | C.3  | 21 | GLN272 | 0.0045  |
| 341      | CG   | 14.4921 | 26.0717 | -9.3939  | C.3  | 21 | GLN272 | 0.0412  |
| 342      | CD   | 15.8698 | 25.4892 | -9.6213  | C.2  | 21 | GLN272 | 0.1737  |
| 343      | OE1  | 16.1323 | 24.9823 | -10.7010 | O.2  | 21 | GLN272 | -0.3973 |
| 344      | NE2  | 16.7742 | 25.5416 | -8.6182  | N.am | 21 | GLN272 | -0.3009 |
| 345      | H    | 11.4961 | 24.1627 | -9.7938  | H    | 21 | GLN272 | 0.1883  |
| 346      | HA   | 14.3391 | 23.3552 | -9.3758  | H    | 21 | GLN272 | 0.0801  |
| 347      | HB3  | 14.1853 | 25.1828 | -7.4481  | H    | 21 | GLN272 | 0.0337  |
| 348      | HB2  | 12.6861 | 25.6918 | -8.2220  | H    | 21 | GLN272 | 0.0337  |
| 349      | HG3  | 14.6062 | 27.0894 | -8.9870  | H    | 21 | GLN272 | 0.0504  |
| 350      | HG2  | 13.9576 | 26.1573 | -10.3515 | H    | 21 | GLN272 | 0.0504  |
| 351      | HE21 | 16.5517 | 25.9617 | -7.7377  | H    | 21 | GLN272 | 0.1814  |
| 352      | HE22 | 17.6891 | 25.1592 | -8.7539  | H    | 21 | GLN272 | 0.1814  |
| 353      | N    | 13.7798 | 22.3142 | -6.9548  | N.am | 22 | PRO273 | -0.2498 |
| BACKBONE |      |         |         |          |      |    |        |         |
| 354      | CA   | 13.3824 | 21.1811 | -6.1235  | C.3  | 22 | PRO273 | 0.1338  |
| BACKBONE |      |         |         |          |      |    |        |         |
| 355      | C    | 12.1311 | 21.2966 | -5.2941  | C.2  | 22 | PRO273 | 0.2041  |
| BACKBONE |      |         |         |          |      |    |        |         |
| 356      | O    | 11.4191 | 20.3114 | -5.1935  | O.2  | 22 | PRO273 | -0.3944 |
| BACKBONE |      |         |         |          |      |    |        |         |
| 357      | CB   | 14.6036 | 21.0843 | -5.1814  | C.3  | 22 | PRO273 | -0.0104 |
| 358      | CG   | 15.7566 | 21.5706 | -6.0857  | C.3  | 22 | PRO273 | -0.0281 |
| 359      | CD   | 15.1365 | 22.8198 | -6.7427  | C.3  | 22 | PRO273 | 0.0369  |
| 360      | HA   | 13.3579 | 20.2763 | -6.7492  | H    | 22 | PRO273 | 0.0802  |
| 361      | HB3  | 14.7276 | 20.0723 | -4.7740  | H    | 22 | PRO273 | 0.0313  |
| 362      | HB2  | 14.5082 | 21.7848 | -4.3360  | H    | 22 | PRO273 | 0.0313  |
| 363      | HG2  | 16.6903 | 21.7792 | -5.5381  | H    | 22 | PRO273 | 0.0287  |
| 364      | HG3  | 15.9516 | 20.8300 | -6.8790  | H    | 22 | PRO273 | 0.0287  |
| 365      | HD2  | 15.1324 | 23.6414 | -6.0091  | H    | 22 | PRO273 | 0.0524  |
| 366      | HD3  | 15.7201 | 23.1046 | -7.6274  | H    | 22 | PRO273 | 0.0524  |
| 367      | N    | 11.8579 | 22.4567 | -4.6606  | N.am | 23 | GLU274 | -0.2636 |
| BACKBONE |      |         |         |          |      |    |        |         |

|          |         |         |          |       |    |        |         |
|----------|---------|---------|----------|-------|----|--------|---------|
| 368 CA   | 10.7627 | 22.5028 | -3.6924  | C.3   | 23 | GLU274 | 0.1325  |
| BACKBONE |         |         |          |       |    |        |         |
| 369 C    | 9.4809  | 21.9894 | -4.3099  | C.2   | 23 | GLU274 | 0.2040  |
| BACKBONE |         |         |          |       |    |        |         |
| 370 O    | 8.8080  | 21.1804 | -3.6897  | O.2   | 23 | GLU274 | -0.3944 |
| BACKBONE |         |         |          |       |    |        |         |
| 371 CB   | 10.5646 | 23.9344 | -3.1221  | C.3   | 23 | GLU274 | -0.0008 |
| 372 CG   | 9.5144  | 23.9746 | -1.9782  | C.3   | 23 | GLU274 | 0.0044  |
| 373 CD   | 9.8960  | 23.1007 | -0.8076  | C.2   | 23 | GLU274 | 0.0350  |
| 374 OE1  | 11.1076 | 23.0504 | -0.4590  | O.co2 | 23 | GLU274 | -0.5690 |
| 375 OE2  | 8.9840  | 22.4556 | -0.2220  | O.co2 | 23 | GLU274 | -0.5690 |
| 376 H    | 12.4411 | 23.2615 | -4.7874  | H     | 23 | GLU274 | 0.1883  |
| 377 HA   | 11.0461 | 21.8325 | -2.8644  | H     | 23 | GLU274 | 0.0801  |
| 378 HB3  | 10.2497 | 24.6065 | -3.9371  | H     | 23 | GLU274 | 0.0330  |
| 379 HB2  | 11.5264 | 24.3049 | -2.7304  | H     | 23 | GLU274 | 0.0330  |
| 380 HG3  | 8.5322  | 23.6651 | -2.3704  | H     | 23 | GLU274 | 0.0433  |
| 381 HG2  | 9.4203  | 25.0082 | -1.6083  | H     | 23 | GLU274 | 0.0433  |
| 382 N    | 9.1321  | 22.4418 | -5.5359  | N.am  | 24 | GLN275 | -0.2636 |
| BACKBONE |         |         |          |       |    |        |         |
| 383 CA   | 7.9063  | 21.9579 | -6.1696  | C.3   | 24 | GLN275 | 0.1330  |
| BACKBONE |         |         |          |       |    |        |         |
| 384 C    | 8.0501  | 20.5045 | -6.5684  | C.2   | 24 | GLN275 | 0.2040  |
| BACKBONE |         |         |          |       |    |        |         |
| 385 O    | 7.0933  | 19.7581 | -6.4345  | O.2   | 24 | GLN275 | -0.3944 |
| BACKBONE |         |         |          |       |    |        |         |
| 386 CB   | 7.5362  | 22.7574 | -7.4482  | C.3   | 24 | GLN275 | 0.0045  |
| 387 CG   | 7.2154  | 24.2471 | -7.1587  | C.3   | 24 | GLN275 | 0.0412  |
| 388 CD   | 6.7216  | 24.9109 | -8.4243  | C.2   | 24 | GLN275 | 0.1737  |
| 389 OE1  | 5.5427  | 25.2163 | -8.5139  | O.2   | 24 | GLN275 | -0.3973 |
| 390 NE2  | 7.6009  | 25.1401 | -9.4257  | N.am  | 24 | GLN275 | -0.3009 |
| 391 H    | 9.7200  | 23.0826 | -6.0334  | H     | 24 | GLN275 | 0.1883  |
| 392 HA   | 7.0755  | 22.0607 | -5.4524  | H     | 24 | GLN275 | 0.0801  |
| 393 HB3  | 6.6376  | 22.2962 | -7.8908  | H     | 24 | GLN275 | 0.0337  |
| 394 HB2  | 8.3612  | 22.6843 | -8.1746  | H     | 24 | GLN275 | 0.0337  |
| 395 HG3  | 8.1080  | 24.7782 | -6.7947  | H     | 24 | GLN275 | 0.0504  |
| 396 HG2  | 6.4397  | 24.3150 | -6.3791  | H     | 24 | GLN275 | 0.0504  |
| 397 HE21 | 8.5669  | 24.8940 | -9.3373  | H     | 24 | GLN275 | 0.1814  |
| 398 HE22 | 7.2855  | 25.5674 | -10.2745 | H     | 24 | GLN275 | 0.1814  |
| 399 N    | 9.2281  | 20.0800 | -7.0790  | N.am  | 25 | LEU276 | -0.2637 |
| BACKBONE |         |         |          |       |    |        |         |
| 400 CA   | 9.3776  | 18.6895 | -7.5140  | C.3   | 25 | LEU276 | 0.1312  |
| BACKBONE |         |         |          |       |    |        |         |
| 401 C    | 9.1370  | 17.7830 | -6.3281  | C.2   | 25 | LEU276 | 0.2039  |
| BACKBONE |         |         |          |       |    |        |         |
| 402 O    | 8.3166  | 16.8821 | -6.4179  | O.2   | 25 | LEU276 | -0.3944 |
| BACKBONE |         |         |          |       |    |        |         |
| 403 CB   | 10.7776 | 18.4374 | -8.1484  | C.3   | 25 | LEU276 | -0.0101 |
| 404 CG   | 10.9468 | 19.1697 | -9.5130  | C.3   | 25 | LEU276 | -0.0425 |
| 405 CD1  | 12.4405 | 19.4298 | -9.8507  | C.3   | 25 | LEU276 | -0.0625 |
| 406 CD2  | 10.3104 | 18.3643 | -10.6788 | C.3   | 25 | LEU276 | -0.0625 |
| 407 H    | 10.0047 | 20.7073 | -7.1607  | H     | 25 | LEU276 | 0.1883  |
| 408 HA   | 8.5992  | 18.4771 | -8.2619  | H     | 25 | LEU276 | 0.0800  |

|          |      |         |         |          |      |    |        |         |
|----------|------|---------|---------|----------|------|----|--------|---------|
| 409      | HB3  | 10.9372 | 17.3631 | -8.3085  | H    | 25 | LEU276 | 0.0315  |
| 410      | HB2  | 11.5420 | 18.7758 | -7.4348  | H    | 25 | LEU276 | 0.0315  |
| 411      | HG   | 10.4438 | 20.1473 | -9.4505  | H    | 25 | LEU276 | 0.0298  |
| 412      | HD13 | 12.9197 | 20.0666 | -9.0953  | H    | 25 | LEU276 | 0.0232  |
| 413      | HD12 | 12.5145 | 19.9455 | -10.8183 | H    | 25 | LEU276 | 0.0232  |
| 414      | HD11 | 12.9931 | 18.4819 | -9.9148  | H    | 25 | LEU276 | 0.0232  |
| 415      | HD23 | 10.8667 | 17.4300 | -10.8420 | H    | 25 | LEU276 | 0.0232  |
| 416      | HD22 | 10.3589 | 18.9647 | -11.5993 | H    | 25 | LEU276 | 0.0232  |
| 417      | HD21 | 9.2611  | 18.1046 | -10.4857 | H    | 25 | LEU276 | 0.0232  |
| 418      | N    | 9.8335  | 18.0241 | -5.1960  | N.am | 26 | ALA277 | -0.2640 |
| BACKBONE |      |         |         |          |      |    |        |         |
| 419      | CA   | 9.5856  | 17.2268 | -3.9994  | C.3  | 26 | ALA277 | 0.1282  |
| BACKBONE |      |         |         |          |      |    |        |         |
| 420      | C    | 8.1192  | 17.3041 | -3.6335  | C.2  | 26 | ALA277 | 0.2036  |
| BACKBONE |      |         |         |          |      |    |        |         |
| 421      | O    | 7.5360  | 16.2722 | -3.3403  | O.2  | 26 | ALA277 | -0.3944 |
| BACKBONE |      |         |         |          |      |    |        |         |
| 422      | CB   | 10.4534 | 17.7141 | -2.8105  | C.3  | 26 | ALA277 | -0.0244 |
| 423      | H    | 10.5084 | 18.7599 | -5.1531  | H    | 26 | ALA277 | 0.1883  |
| 424      | HA   | 9.8611  | 16.1835 | -4.2172  | H    | 26 | ALA277 | 0.0797  |
| 425      | HB3  | 10.2238 | 18.7669 | -2.5891  | H    | 26 | ALA277 | 0.0277  |
| 426      | HB2  | 11.5226 | 17.6292 | -3.0606  | H    | 26 | ALA277 | 0.0277  |
| 427      | HB1  | 10.2570 | 17.1091 | -1.9129  | H    | 26 | ALA277 | 0.0277  |
| 428      | N    | 7.5048  | 18.5117 | -3.6473  | N.am | 27 | ALA278 | -0.2640 |
| BACKBONE |      |         |         |          |      |    |        |         |
| 429      | CA   | 6.0908  | 18.6216 | -3.2831  | C.3  | 27 | ALA278 | 0.1282  |
| BACKBONE |      |         |         |          |      |    |        |         |
| 430      | C    | 5.2580  | 17.6592 | -4.0967  | C.2  | 27 | ALA278 | 0.2036  |
| BACKBONE |      |         |         |          |      |    |        |         |
| 431      | O    | 4.4063  | 16.9993 | -3.5214  | O.2  | 27 | ALA278 | -0.3944 |
| BACKBONE |      |         |         |          |      |    |        |         |
| 432      | CB   | 5.5347  | 20.0577 | -3.4662  | C.3  | 27 | ALA278 | -0.0244 |
| 433      | H    | 8.0078  | 19.3440 | -3.8877  | H    | 27 | ALA278 | 0.1883  |
| 434      | HA   | 5.9875  | 18.3637 | -2.2165  | H    | 27 | ALA278 | 0.0797  |
| 435      | HB3  | 5.5141  | 20.3330 | -4.5295  | H    | 27 | ALA278 | 0.0277  |
| 436      | HB2  | 6.1590  | 20.7818 | -2.9200  | H    | 27 | ALA278 | 0.0277  |
| 437      | HB1  | 4.5085  | 20.1221 | -3.0741  | H    | 27 | ALA278 | 0.0277  |
| 438      | N    | 5.4989  | 17.5455 | -5.4250  | N.am | 28 | ALA279 | -0.2640 |
| BACKBONE |      |         |         |          |      |    |        |         |
| 439      | CA   | 4.7193  | 16.6174 | -6.2465  | C.3  | 28 | ALA279 | 0.1282  |
| BACKBONE |      |         |         |          |      |    |        |         |
| 440      | C    | 5.3305  | 15.2295 | -6.2663  | C.2  | 28 | ALA279 | 0.2034  |
| BACKBONE |      |         |         |          |      |    |        |         |
| 441      | O    | 5.3956  | 14.6188 | -7.3219  | O.2  | 28 | ALA279 | -0.3944 |
| BACKBONE |      |         |         |          |      |    |        |         |
| 442      | CB   | 4.5190  | 17.2098 | -7.6650  | C.3  | 28 | ALA279 | -0.0244 |
| 443      | H    | 6.2307  | 18.0702 | -5.8636  | H    | 28 | ALA279 | 0.1883  |
| 444      | HA   | 3.7063  | 16.5017 | -5.8364  | H    | 28 | ALA279 | 0.0797  |
| 445      | HB3  | 5.4962  | 17.3025 | -8.1518  | H    | 28 | ALA279 | 0.0277  |
| 446      | HB2  | 4.0650  | 18.2104 | -7.5994  | H    | 28 | ALA279 | 0.0277  |
| 447      | HB1  | 3.8718  | 16.5686 | -8.2830  | H    | 28 | ALA279 | 0.0277  |

|          |         |         |          |      |    |        |         |
|----------|---------|---------|----------|------|----|--------|---------|
| 448 N    | 5.7641  | 14.6950 | -5.0993  | N.am | 29 | GLY280 | -0.2664 |
| BACKBONE |         |         |          |      |    |        |         |
| 449 CA   | 6.1862  | 13.2986 | -5.0294  | C.3  | 29 | GLY280 | 0.1201  |
| BACKBONE |         |         |          |      |    |        |         |
| 450 C    | 7.4119  | 12.9285 | -5.8327  | C.2  | 29 | GLY280 | 0.2009  |
| BACKBONE |         |         |          |      |    |        |         |
| 451 O    | 7.6561  | 11.7351 | -5.9153  | O.2  | 29 | GLY280 | -0.3947 |
| BACKBONE |         |         |          |      |    |        |         |
| 452 H    | 5.7346  | 15.2067 | -4.2405  | H    | 29 | GLY280 | 0.1881  |
| 453 HA2  | 5.3472  | 12.6707 | -5.3714  | H    | 29 | GLY280 | 0.0763  |
| 454 HA3  | 6.3842  | 13.0271 | -3.9818  | H    | 29 | GLY280 | 0.0763  |
| 455 N    | 8.1941  | 13.8671 | -6.4222  | N.am | 30 | PHE281 | -0.2622 |
| BACKBONE |         |         |          |      |    |        |         |
| 456 CA   | 9.3158  | 13.4627 | -7.2775  | C.3  | 30 | PHE281 | 0.1404  |
| BACKBONE |         |         |          |      |    |        |         |
| 457 C    | 10.6423 | 13.5065 | -6.5569  | C.2  | 30 | PHE281 | 0.2061  |
| BACKBONE |         |         |          |      |    |        |         |
| 458 O    | 10.7476 | 14.2658 | -5.6091  | O.2  | 30 | PHE281 | -0.3942 |
| BACKBONE |         |         |          |      |    |        |         |
| 459 CB   | 9.4284  | 14.3657 | -8.5278  | C.3  | 30 | PHE281 | 0.0214  |
| 460 CG   | 8.2041  | 14.2184 | -9.4371  | C.ar | 30 | PHE281 | -0.0386 |
| 461 CD1  | 8.0041  | 13.0376 | -10.1604 | C.ar | 30 | PHE281 | -0.0601 |
| 462 CD2  | 7.2862  | 15.2652 | -9.5569  | C.ar | 30 | PHE281 | -0.0601 |
| 463 CE1  | 6.8724  | 12.8874 | -10.9673 | C.ar | 30 | PHE281 | -0.0686 |
| 464 CE2  | 6.1511  | 15.1181 | -10.3600 | C.ar | 30 | PHE281 | -0.0686 |
| 465 CZ   | 5.9312  | 13.9160 | -11.0368 | C.ar | 30 | PHE281 | -0.0687 |
| 466 H    | 8.0310  | 14.8456 | -6.2885  | H    | 30 | PHE281 | 0.1885  |
| 467 HA   | 9.1615  | 12.4393 | -7.6411  | H    | 30 | PHE281 | 0.0823  |
| 468 HB3  | 10.3082 | 14.0734 | -9.1089  | H    | 30 | PHE281 | 0.0474  |
| 469 HB2  | 9.5711  | 15.4078 | -8.2135  | H    | 30 | PHE281 | 0.0474  |
| 470 HD1  | 8.7260  | 12.2319 | -10.1035 | H    | 30 | PHE281 | 0.0557  |
| 471 HD2  | 7.4547  | 16.1944 | -9.0271  | H    | 30 | PHE281 | 0.0557  |
| 472 HE1  | 6.7276  | 11.9765 | -11.5397 | H    | 30 | PHE281 | 0.0599  |
| 473 HE2  | 5.4473  | 15.9372 | -10.4572 | H    | 30 | PHE281 | 0.0599  |
| 474 HZ   | 5.0315  | 13.7787 | -11.6222 | H    | 30 | PHE281 | 0.0559  |
| 475 N    | 11.6563 | 12.7179 | -7.0011  | N.am | 31 | TYR282 | -0.2620 |
| BACKBONE |         |         |          |      |    |        |         |
| 476 CA   | 12.9478 | 12.6851 | -6.3120  | C.3  | 31 | TYR282 | 0.1390  |
| BACKBONE |         |         |          |      |    |        |         |
| 477 C    | 14.0776 | 12.5605 | -7.3198  | C.2  | 31 | TYR282 | 0.2058  |
| BACKBONE |         |         |          |      |    |        |         |
| 478 O    | 13.9705 | 11.7162 | -8.1947  | O.2  | 31 | TYR282 | -0.3942 |
| BACKBONE |         |         |          |      |    |        |         |
| 479 CB   | 12.9221 | 11.5309 | -5.2744  | C.3  | 31 | TYR282 | 0.0163  |
| 480 CG   | 12.8546 | 10.1453 | -5.9266  | C.ar | 31 | TYR282 | -0.0493 |
| 481 CD1  | 11.6198 | 9.5643  | -6.2345  | C.ar | 31 | TYR282 | -0.0685 |
| 482 CD2  | 14.0314 | 9.4405  | -6.2035  | C.ar | 31 | TYR282 | -0.0685 |
| 483 CE1  | 11.5664 | 8.3098  | -6.8493  | C.ar | 31 | TYR282 | -0.0398 |
| 484 CE2  | 13.9711 | 8.1516  | -6.7404  | C.ar | 31 | TYR282 | -0.0398 |
| 485 CZ   | 12.7411 | 7.5837  | -7.0802  | C.ar | 31 | TYR282 | 0.0805  |
| 486 OH   | 12.7098 | 6.3041  | -7.6452  | O.3  | 31 | TYR282 | -0.3376 |
| 487 H    | 11.5343 | 12.1061 | -7.7847  | H    | 31 | TYR282 | 0.1885  |

|          |      |         |         |          |      |    |        |         |
|----------|------|---------|---------|----------|------|----|--------|---------|
| 488      | HA   | 13.0849 | 13.6167 | -5.7418  | H    | 31 | TYR282 | 0.0821  |
| 489      | HB2  | 12.0383 | 11.6642 | -4.6349  | H    | 31 | TYR282 | 0.0453  |
| 490      | HB3  | 13.8036 | 11.5588 | -4.6196  | H    | 31 | TYR282 | 0.0453  |
| 491      | HD1  | 10.6965 | 10.0854 | -5.9975  | H    | 31 | TYR282 | 0.0530  |
| 492      | HD2  | 14.9984 | 9.8879  | -5.9972  | H    | 31 | TYR282 | 0.0530  |
| 493      | HE1  | 10.6074 | 7.9046  | -7.1482  | H    | 31 | TYR282 | 0.0525  |
| 494      | HE2  | 14.8824 | 7.5830  | -6.8938  | H    | 31 | TYR282 | 0.0525  |
| 495      | HH   | 11.8351 | 5.9657  | -7.8021  | H    | 31 | TYR282 | 0.2458  |
| 496      | N    | 15.1489 | 13.3916 | -7.2358  | N.am | 32 | TYR283 | -0.2620 |
| BACKBONE |      |         |         |          |      |    |        |         |
| 497      | CA   | 16.2205 | 13.3620 | -8.2396  | C.3  | 32 | TYR283 | 0.1390  |
| BACKBONE |      |         |         |          |      |    |        |         |
| 498      | C    | 16.9046 | 12.0144 | -8.2963  | C.2  | 32 | TYR283 | 0.2057  |
| BACKBONE |      |         |         |          |      |    |        |         |
| 499      | O    | 16.9066 | 11.3372 | -7.2803  | O.2  | 32 | TYR283 | -0.3942 |
| BACKBONE |      |         |         |          |      |    |        |         |
| 500      | CB   | 17.2568 | 14.4867 | -7.9241  | C.3  | 32 | TYR283 | 0.0163  |
| 501      | CG   | 18.3821 | 14.7519 | -8.9389  | C.ar | 32 | TYR283 | -0.0493 |
| 502      | CD1  | 18.1144 | 14.8119 | -10.3097 | C.ar | 32 | TYR283 | -0.0685 |
| 503      | CD2  | 19.6967 | 14.9688 | -8.5059  | C.ar | 32 | TYR283 | -0.0685 |
| 504      | CE1  | 19.1393 | 15.0139 | -11.2365 | C.ar | 32 | TYR283 | -0.0398 |
| 505      | CE2  | 20.7200 | 15.2097 | -9.4281  | C.ar | 32 | TYR283 | -0.0398 |
| 506      | CZ   | 20.4523 | 15.2236 | -10.7995 | C.ar | 32 | TYR283 | 0.0805  |
| 507      | OH   | 21.4962 | 15.4456 | -11.7042 | O.3  | 32 | TYR283 | -0.3376 |
| 508      | H    | 15.2011 | 14.0885 | -6.5197  | H    | 32 | TYR283 | 0.1885  |
| 509      | HA   | 15.7345 | 13.5514 | -9.2039  | H    | 32 | TYR283 | 0.0821  |
| 510      | HB2  | 17.6894 | 14.2804 | -6.9338  | H    | 32 | TYR283 | 0.0453  |
| 511      | HB3  | 16.7254 | 15.4420 | -7.8663  | H    | 32 | TYR283 | 0.0453  |
| 512      | HD1  | 17.1013 | 14.7116 | -10.6667 | H    | 32 | TYR283 | 0.0530  |
| 513      | HD2  | 19.9366 | 14.9549 | -7.4476  | H    | 32 | TYR283 | 0.0530  |
| 514      | HE1  | 18.9001 | 15.0054 | -12.2924 | H    | 32 | TYR283 | 0.0525  |
| 515      | HE2  | 21.7326 | 15.3830 | -9.0781  | H    | 32 | TYR283 | 0.0525  |
| 516      | HH   | 21.2189 | 15.5031 | -12.6118 | H    | 32 | TYR283 | 0.2458  |
| 517      | N    | 17.4797 | 11.6194 | -9.4636  | N.am | 33 | VAL284 | -0.2633 |
| BACKBONE |      |         |         |          |      |    |        |         |
| 518      | CA   | 18.1884 | 10.3417 | -9.5708  | C.3  | 33 | VAL284 | 0.1332  |
| BACKBONE |      |         |         |          |      |    |        |         |
| 519      | C    | 19.5922 | 10.5346 | -10.1134 | C.2  | 33 | VAL284 | 0.2039  |
| BACKBONE |      |         |         |          |      |    |        |         |
| 520      | O    | 20.1074 | 9.6416  | -10.7673 | O.2  | 33 | VAL284 | -0.3944 |
| BACKBONE |      |         |         |          |      |    |        |         |
| 521      | CB   | 17.3514 | 9.3052  | -10.3816 | C.3  | 33 | VAL284 | -0.0063 |
| 522      | CG1  | 15.9697 | 9.0769  | -9.7094  | C.3  | 33 | VAL284 | -0.0584 |
| 523      | CG2  | 17.1481 | 9.7244  | -11.8661 | C.3  | 33 | VAL284 | -0.0584 |
| 524      | H    | 17.4355 | 12.1872 | -10.2874 | H    | 33 | VAL284 | 0.1883  |
| 525      | HA   | 18.3637 | 9.9041  | -8.5737  | H    | 33 | VAL284 | 0.0802  |
| 526      | HB   | 17.9020 | 8.3471  | -10.3521 | H    | 33 | VAL284 | 0.0343  |
| 527      | HG13 | 16.1147 | 8.8176  | -8.6512  | H    | 33 | VAL284 | 0.0234  |
| 528      | HG12 | 15.4245 | 8.2521  | -10.1946 | H    | 33 | VAL284 | 0.0234  |
| 529      | HG11 | 15.3534 | 9.9865  | -9.7697  | H    | 33 | VAL284 | 0.0234  |
| 530      | HG23 | 16.5236 | 10.6262 | -11.9353 | H    | 33 | VAL284 | 0.0234  |
| 531      | HG22 | 16.6433 | 8.9193  | -12.4235 | H    | 33 | VAL284 | 0.0234  |

|          |         |         |          |       |    |        |         |
|----------|---------|---------|----------|-------|----|--------|---------|
| 532 HG21 | 18.1115 | 9.9269  | -12.3558 | H     | 33 | VAL284 | 0.0234  |
| 533 N    | 20.2465 | 11.6856 | -9.8300  | N.am  | 34 | GLY285 | -0.2664 |
| BACKBONE |         |         |          |       |    |        |         |
| 534 CA   | 21.6398 | 11.8670 | -10.2345 | C.3   | 34 | GLY285 | 0.1201  |
| BACKBONE |         |         |          |       |    |        |         |
| 535 C    | 21.8797 | 11.8170 | -11.7260 | C.2   | 34 | GLY285 | 0.2007  |
| BACKBONE |         |         |          |       |    |        |         |
| 536 O    | 22.9696 | 11.4111 | -12.0997 | O.2   | 34 | GLY285 | -0.3947 |
| BACKBONE |         |         |          |       |    |        |         |
| 537 H    | 19.8180 | 12.4009 | -9.2785  | H     | 34 | GLY285 | 0.1881  |
| 538 HA2  | 22.2373 | 11.0832 | -9.7411  | H     | 34 | GLY285 | 0.0763  |
| 539 HA3  | 22.0243 | 12.8374 | -9.8850  | H     | 34 | GLY285 | 0.0763  |
| 540 N    | 20.9190 | 12.2268 | -12.5908 | N.am  | 35 | ARG286 | -0.2640 |
| BACKBONE |         |         |          |       |    |        |         |
| 541 CA   | 21.1491 | 12.1786 | -14.0383 | C.3   | 35 | ARG286 | 0.1311  |
| BACKBONE |         |         |          |       |    |        |         |
| 542 C    | 20.4902 | 13.3672 | -14.7079 | C.2   | 35 | ARG286 | 0.2040  |
| BACKBONE |         |         |          |       |    |        |         |
| 543 O    | 19.2707 | 13.4120 | -14.6967 | O.2   | 35 | ARG286 | -0.3944 |
| BACKBONE |         |         |          |       |    |        |         |
| 544 CB   | 20.5391 | 10.8799 | -14.6343 | C.3   | 35 | ARG286 | -0.0092 |
| 545 CG   | 21.2454 | 9.5977  | -14.1186 | C.3   | 35 | ARG286 | -0.0156 |
| 546 CD   | 20.5375 | 8.3119  | -14.6274 | C.3   | 35 | ARG286 | 0.0627  |
| 547 NE   | 21.1736 | 7.1015  | -14.1010 | N.pl3 | 35 | ARG286 | -0.2723 |
| 548 CZ   | 20.7212 | 5.8852  | -14.3265 | C.cat | 35 | ARG286 | 0.2882  |
| 549 NH1  | 19.6597 | 5.6457  | -15.0646 | N.pl3 | 35 | ARG286 | -0.2849 |
| 550 NH2  | 21.3548 | 4.8661  | -13.7931 | N.pl3 | 35 | ARG286 | -0.2849 |
| 551 H    | 20.0229 | 12.5344 | -12.2645 | H     | 35 | ARG286 | 0.1883  |
| 552 HA   | 22.2248 | 12.1862 | -14.2787 | H     | 35 | ARG286 | 0.0800  |
| 553 HB3  | 20.6125 | 10.9116 | -15.7349 | H     | 35 | ARG286 | 0.0313  |
| 554 HB2  | 19.4751 | 10.8315 | -14.3634 | H     | 35 | ARG286 | 0.0313  |
| 555 HG3  | 21.2235 | 9.5778  | -13.0200 | H     | 35 | ARG286 | 0.0301  |
| 556 HG2  | 22.2988 | 9.5984  | -14.4448 | H     | 35 | ARG286 | 0.0301  |
| 557 HD3  | 20.5730 | 8.3043  | -15.7296 | H     | 35 | ARG286 | 0.0689  |
| 558 HD2  | 19.4884 | 8.3514  | -14.2887 | H     | 35 | ARG286 | 0.0689  |
| 559 HE   | 22.0160 | 7.2233  | -13.5153 | H     | 35 | ARG286 | 0.2642  |
| 560 HH11 | 19.1286 | 6.4026  | -15.5125 | H     | 35 | ARG286 | 0.2615  |
| 561 HH12 | 19.3312 | 4.6806  | -15.2181 | H     | 35 | ARG286 | 0.2615  |
| 562 HH21 | 22.1922 | 5.0048  | -13.2065 | H     | 35 | ARG286 | 0.2615  |
| 563 HH22 | 21.0323 | 3.8984  | -13.9454 | H     | 35 | ARG286 | 0.2615  |
| 564 N    | 21.2482 | 14.3229 | -15.3030 | N.am  | 36 | ASN287 | -0.2616 |
| BACKBONE |         |         |          |       |    |        |         |
| 565 CA   | 20.6130 | 15.3921 | -16.0763 | C.3   | 36 | ASN287 | 0.1476  |
| BACKBONE |         |         |          |       |    |        |         |
| 566 C    | 19.5365 | 16.0398 | -15.2303 | C.2   | 36 | ASN287 | 0.2063  |
| BACKBONE |         |         |          |       |    |        |         |
| 567 O    | 19.8845 | 16.4241 | -14.1252 | O.2   | 36 | ASN287 | -0.3942 |
| BACKBONE |         |         |          |       |    |        |         |
| 568 CB   | 20.1692 | 14.7685 | -17.4287 | C.3   | 36 | ASN287 | 0.0773  |
| 569 CG   | 21.3358 | 14.0690 | -18.0869 | C.2   | 36 | ASN287 | 0.1780  |
| 570 OD1  | 21.3790 | 12.8484 | -18.0748 | O.2   | 36 | ASN287 | -0.3970 |
| 571 ND2  | 22.3015 | 14.8183 | -18.6638 | N.am  | 36 | ASN287 | -0.3007 |

|          |         |         |                |           |         |
|----------|---------|---------|----------------|-----------|---------|
| 572 H    | 22.2504 | 14.2869 | -15.2883 H     | 36 ASN287 | 0.1885  |
| 573 HA   | 21.3487 | 16.1865 | -16.2902 H     | 36 ASN287 | 0.0826  |
| 574 HB3  | 19.7925 | 15.5456 | -18.1126 H     | 36 ASN287 | 0.0551  |
| 575 HB2  | 19.3674 | 14.0324 | -17.2615 H     | 36 ASN287 | 0.0551  |
| 576 HD21 | 22.2520 | 15.8180 | -18.6689 H     | 36 ASN287 | 0.1814  |
| 577 HD22 | 23.0818 | 14.3684 | -19.0999 H     | 36 ASN287 | 0.1814  |
| 578 N    | 18.2622 | 16.1642 | -15.6775 N.am  | 37 ASP288 | -0.2620 |
| BACKBONE |         |         |                |           |         |
| 579 CA   | 17.2001 | 16.6788 | -14.8131 C.3   | 37 ASP288 | 0.1423  |
| BACKBONE |         |         |                |           |         |
| 580 C    | 16.1440 | 15.5994 | -14.7133 C.2   | 37 ASP288 | 0.2057  |
| BACKBONE |         |         |                |           |         |
| 581 O    | 14.9658 | 15.8706 | -14.8834 O.2   | 37 ASP288 | -0.3943 |
| BACKBONE |         |         |                |           |         |
| 582 CB   | 16.6910 | 18.0147 | -15.4151 C.3   | 37 ASP288 | 0.0406  |
| 583 CG   | 16.1005 | 17.8806 | -16.7950 C.2   | 37 ASP288 | 0.0393  |
| 584 OD1  | 16.1637 | 16.7670 | -17.3829 O.co2 | 37 ASP288 | -0.5688 |
| 585 OD2  | 15.5647 | 18.9009 | -17.3080 O.co2 | 37 ASP288 | -0.5688 |
| 586 H    | 17.9815 | 15.8830 | -16.5948 H     | 37 ASP288 | 0.1884  |
| 587 HA   | 17.5465 | 16.8765 | -13.7853 H     | 37 ASP288 | 0.0819  |
| 588 HB3  | 17.5480 | 18.7002 | -15.4884 H     | 37 ASP288 | 0.0478  |
| 589 HB2  | 15.9417 | 18.4622 | -14.7469 H     | 37 ASP288 | 0.0478  |
| 590 N    | 16.5937 | 14.3490 | -14.4514 N.am  | 38 ASP289 | -0.2621 |
| BACKBONE |         |         |                |           |         |
| 591 CA   | 15.6904 | 13.2002 | -14.4474 C.3   | 38 ASP289 | 0.1423  |
| BACKBONE |         |         |                |           |         |
| 592 C    | 15.1145 | 13.0078 | -13.0663 C.2   | 38 ASP289 | 0.2056  |
| BACKBONE |         |         |                |           |         |
| 593 O    | 15.8634 | 13.1783 | -12.1186 O.2   | 38 ASP289 | -0.3943 |
| BACKBONE |         |         |                |           |         |
| 594 CB   | 16.4731 | 11.9102 | -14.8105 C.3   | 38 ASP289 | 0.0406  |
| 595 CG   | 17.0702 | 11.9568 | -16.1941 C.2   | 38 ASP289 | 0.0393  |
| 596 OD1  | 16.9212 | 12.9978 | -16.8899 O.co2 | 38 ASP289 | -0.5688 |
| 597 OD2  | 17.6977 | 10.9417 | -16.6040 O.co2 | 38 ASP289 | -0.5688 |
| 598 H    | 17.5622 | 14.1877 | -14.2547 H     | 38 ASP289 | 0.1884  |
| 599 HA   | 14.8921 | 13.3414 | -15.1912 H     | 38 ASP289 | 0.0819  |
| 600 HB3  | 15.8170 | 11.0327 | -14.7374 H     | 38 ASP289 | 0.0478  |
| 601 HB2  | 17.2833 | 11.7735 | -14.0809 H     | 38 ASP289 | 0.0478  |
| 602 N    | 13.8169 | 12.6449 | -12.9227 N.am  | 39 VAL290 | -0.2634 |
| BACKBONE |         |         |                |           |         |
| 603 CA   | 13.2500 | 12.4246 | -11.5917 C.3   | 39 VAL290 | 0.1333  |
| BACKBONE |         |         |                |           |         |
| 604 C    | 12.2202 | 11.3226 | -11.6749 C.2   | 39 VAL290 | 0.2041  |
| BACKBONE |         |         |                |           |         |
| 605 O    | 11.6962 | 11.1722 | -12.7651 O.2   | 39 VAL290 | -0.3944 |
| BACKBONE |         |         |                |           |         |
| 606 CB   | 12.5653 | 13.7215 | -11.0660 C.3   | 39 VAL290 | -0.0063 |
| 607 CG1  | 13.4785 | 14.9687 | -11.2043 C.3   | 39 VAL290 | -0.0584 |
| 608 CG2  | 11.2225 | 14.0179 | -11.7947 C.3   | 39 VAL290 | -0.0584 |
| 609 H    | 13.2143 | 12.5313 | -13.7149 H     | 39 VAL290 | 0.1883  |
| 610 HA   | 14.0416 | 12.0997 | -10.8942 H     | 39 VAL290 | 0.0802  |
| 611 HB   | 12.3714 | 13.5619 | -9.9928 H      | 39 VAL290 | 0.0343  |



|          |      |         |         |          |      |    |        |         |
|----------|------|---------|---------|----------|------|----|--------|---------|
| 612      | HG13 | 14.4244 | 14.8077 | -10.6760 | H    | 39 | VAL290 | 0.0234  |
| 613      | HG12 | 12.9893 | 15.8514 | -10.7664 | H    | 39 | VAL290 | 0.0234  |
| 614      | HG11 | 13.6923 | 15.1871 | -12.2611 | H    | 39 | VAL290 | 0.0234  |
| 615      | HG23 | 11.4018 | 14.1653 | -12.8693 | H    | 39 | VAL290 | 0.0234  |
| 616      | HG22 | 10.7673 | 14.9323 | -11.3901 | H    | 39 | VAL290 | 0.0234  |
| 617      | HG21 | 10.4897 | 13.2087 | -11.6691 | H    | 39 | VAL290 | 0.0234  |
| 618      | O    | 9.6567  | 13.0857 | -20.2209 | O.2  | 40 | LYS291 | -0.3942 |
| BACKBONE |      |         |         |          |      |    |        |         |
| 619      | C    | 8.6507  | 13.1409 | -20.9098 | C.2  | 40 | LYS291 | 0.2067  |
| BACKBONE |      |         |         |          |      |    |        |         |
| 620      | N    | 7.7144  | 12.1562 | -20.8343 | N.am | 40 | LYS291 | -0.2498 |
| BACKBONE |      |         |         |          |      |    |        |         |
| 621      | C    | 7.9389  | 11.0005 | -19.9751 | C.3  | 40 | LYS291 | 0.1338  |
| BACKBONE |      |         |         |          |      |    |        |         |
| 622      | H    | 7.8404  | 11.3248 | -18.9250 | H    | 40 | LYS291 | 0.0802  |
| 623      | C    | 9.2419  | 10.2902 | -20.2574 | C.2  | 40 | LYS291 | 0.2038  |
| BACKBONE |      |         |         |          |      |    |        |         |
| 624      | N    | 9.9822  | 9.7901  | -19.2402 | N.am | 40 | LYS291 | -0.2719 |
| BACKBONE |      |         |         |          |      |    |        |         |
| 625      | H    | 9.6999  | 9.8863  | -18.2811 | H    | 40 | LYS291 | 0.1879  |
| 626      | C    | 11.1799 | 9.0067  | -19.5331 | C.3  | 40 | LYS291 | 0.0721  |
| BACKBONE |      |         |         |          |      |    |        |         |
| 627      | H    | 11.6893 | 9.3488  | -20.4482 | H    | 40 | LYS291 | 0.0703  |
| 628      | C    | 12.2242 | 9.0554  | -18.4284 | C.ar | 40 | LYS291 | -0.0243 |
| BACKBONE |      |         |         |          |      |    |        |         |
| 629      | C    | 12.6912 | 7.7907  | -18.0921 | C.ar | 40 | LYS291 | -0.0074 |
| BACKBONE |      |         |         |          |      |    |        |         |
| 630      | C    | 12.0303 | 6.7210  | -18.9460 | C.3  | 40 | LYS291 | -0.0199 |
| BACKBONE |      |         |         |          |      |    |        |         |
| 631      | H    | 12.7674 | 6.3730  | -19.6865 | H    | 40 | LYS291 | 0.0389  |
| 632      | H    | 11.6838 | 5.8703  | -18.3374 | H    | 40 | LYS291 | 0.0389  |
| 633      | C    | 10.8667 | 7.4874  | -19.6366 | C.3  | 40 | LYS291 | -0.0141 |
| BACKBONE |      |         |         |          |      |    |        |         |
| 634      | H    | 10.7194 | 7.1620  | -20.6777 | H    | 40 | LYS291 | 0.0326  |
| 635      | H    | 9.9392  | 7.2850  | -19.0815 | H    | 40 | LYS291 | 0.0326  |
| 636      | C    | 13.6564 | 7.6123  | -17.0998 | C.ar | 40 | LYS291 | 0.1199  |
| BACKBONE |      |         |         |          |      |    |        |         |
| 637      | C    | 14.2687 | 8.7617  | -16.5805 | C.ar | 40 | LYS291 | -0.0439 |
| BACKBONE |      |         |         |          |      |    |        |         |
| 638      | H    | 15.1086 | 8.6810  | -15.9042 | H    | 40 | LYS291 | 0.0468  |
| 639      | C    | 13.8071 | 10.0335 | -16.9393 | C.ar | 40 | LYS291 | -0.0838 |
| BACKBONE |      |         |         |          |      |    |        |         |
| 640      | H    | 14.2951 | 10.9105 | -16.5427 | H    | 40 | LYS291 | 0.0515  |
| 641      | C    | 12.7154 | 10.1945 | -17.7968 | C.ar | 40 | LYS291 | -0.0756 |
| BACKBONE |      |         |         |          |      |    |        |         |
| 642      | H    | 12.2693 | 11.1663 | -17.9680 | H    | 40 | LYS291 | 0.0448  |
| 643      | O    | 13.9800 | 6.3154  | -16.6766 | O.3  | 40 | LYS291 | -0.1602 |
| BACKBONE |      |         |         |          |      |    |        |         |
| 644      | S    | 14.7818 | 5.9650  | -15.4401 | S.o2 | 40 | LYS291 | 0.1795  |
| 645      | O    | 14.6675 | 4.5291  | -15.2791 | O.2  | 40 | LYS291 | -0.1229 |
| BACKBONE |      |         |         |          |      |    |        |         |

|          |         |         |          |      |    |        |         |
|----------|---------|---------|----------|------|----|--------|---------|
| 646 O    | 16.1189 | 6.5127  | -15.5487 | O.2  | 40 | LYS291 | -0.1229 |
| BACKBONE |         |         |          |      |    |        |         |
| 647 N1   | 13.9903 | 6.7079  | -14.1667 | N.am | 40 | LYS291 | -0.2249 |
| 648 O    | 9.5745  | 10.1698 | -21.4248 | O.2  | 40 | LYS291 | -0.3944 |
| BACKBONE |         |         |          |      |    |        |         |
| 649 C    | 6.7571  | 10.0835 | -20.3842 | C.3  | 40 | LYS291 | -0.0104 |
| BACKBONE |         |         |          |      |    |        |         |
| 650 H    | 7.0330  | 9.4540  | -21.2433 | H    | 40 | LYS291 | 0.0313  |
| 651 H    | 6.4111  | 9.4316  | -19.5648 | H    | 40 | LYS291 | 0.0313  |
| 652 C    | 5.6768  | 11.0766 | -20.8572 | C.3  | 40 | LYS291 | -0.0281 |
| BACKBONE |         |         |          |      |    |        |         |
| 653 H    | 5.1922  | 11.4939 | -19.9593 | H    | 40 | LYS291 | 0.0287  |
| 654 H    | 4.9138  | 10.5992 | -21.4911 | H    | 40 | LYS291 | 0.0287  |
| 655 C    | 6.4691  | 12.1813 | -21.6016 | C.3  | 40 | LYS291 | 0.0369  |
| BACKBONE |         |         |          |      |    |        |         |
| 656 H    | 5.9058  | 13.1286 | -21.5721 | H    | 40 | LYS291 | 0.0524  |
| 657 H    | 6.6715  | 11.8881 | -22.6446 | H    | 40 | LYS291 | 0.0524  |
| 658 C    | 8.5429  | 14.3477 | -21.8262 | C.3  | 40 | LYS291 | 0.1339  |
| BACKBONE |         |         |          |      |    |        |         |
| 659 H    | 7.6049  | 14.3730 | -22.3982 | H    | 40 | LYS291 | 0.0803  |
| 660 N    | 8.6776  | 15.5818 | -21.0441 | N.am | 40 | LYS291 | -0.2641 |
| BACKBONE |         |         |          |      |    |        |         |
| 661 H    | 9.6012  | 15.9210 | -20.8733 | H    | 40 | LYS291 | 0.1883  |
| 662 C    | 7.5892  | 16.2443 | -20.5784 | C.2  | 40 | LYS291 | 0.1952  |
| BACKBONE |         |         |          |      |    |        |         |
| 663 C    | 7.7654  | 17.6009 | -19.9196 | C.3  | 40 | LYS291 | 0.0951  |
| BACKBONE |         |         |          |      |    |        |         |
| 664 H    | 8.2585  | 18.2569 | -20.6516 | H    | 40 | LYS291 | 0.0700  |
| 665 N    | 6.4400  | 18.1934 | -19.5987 | N.3  | 40 | LYS291 | -0.2998 |
| BACKBONE |         |         |          |      |    |        |         |
| 666 H    | 6.5222  | 18.9364 | -18.8162 | H    | 40 | LYS291 | 0.1245  |
| 667 C    | 5.7022  | 18.7705 | -20.7448 | C.3  | 40 | LYS291 | -0.0133 |
| BACKBONE |         |         |          |      |    |        |         |
| 668 H    | 6.2462  | 19.6326 | -21.1629 | H    | 40 | LYS291 | 0.0390  |
| 669 H    | 5.5591  | 18.0225 | -21.5380 | H    | 40 | LYS291 | 0.0390  |
| 670 H    | 4.7094  | 19.1140 | -20.4167 | H    | 40 | LYS291 | 0.0390  |
| 671 C    | 8.6895  | 17.5443 | -18.6694 | C.3  | 40 | LYS291 | -0.0322 |
| BACKBONE |         |         |          |      |    |        |         |
| 672 H    | 8.3349  | 16.7823 | -17.9684 | H    | 40 | LYS291 | 0.0269  |
| 673 H    | 9.7216  | 17.2971 | -18.9442 | H    | 40 | LYS291 | 0.0269  |
| 674 H    | 8.7183  | 18.5135 | -18.1478 | H    | 40 | LYS291 | 0.0269  |
| 675 O    | 6.4592  | 15.7950 | -20.6857 | O.2  | 40 | LYS291 | -0.3952 |
| BACKBONE |         |         |          |      |    |        |         |
| 676 C    | 9.6709  | 14.2687 | -22.8992 | C.3  | 40 | LYS291 | -0.0006 |
| BACKBONE |         |         |          |      |    |        |         |
| 677 H    | 10.6408 | 14.2622 | -22.3725 | H    | 40 | LYS291 | 0.0348  |
| 678 C    | 9.5689  | 12.9754 | -23.7550 | C.3  | 40 | LYS291 | -0.0460 |
| BACKBONE |         |         |          |      |    |        |         |
| 679 H    | 9.5969  | 12.0832 | -23.1116 | H    | 40 | LYS291 | 0.0270  |
| 680 H    | 8.6092  | 12.9672 | -24.2967 | H    | 40 | LYS291 | 0.0270  |
| 681 C    | 10.7403 | 12.9074 | -24.7708 | C.3  | 40 | LYS291 | -0.0526 |
| BACKBONE |         |         |          |      |    |        |         |

|          |         |         |               |    |        |         |
|----------|---------|---------|---------------|----|--------|---------|
| 682 H    | 10.6476 | 11.9953 | -25.3827 H    | 40 | LYS291 | 0.0265  |
| 683 H    | 11.6972 | 12.8537 | -24.2267 H    | 40 | LYS291 | 0.0265  |
| 684 C    | 10.7375 | 14.1502 | -25.6976 C.3  | 40 | LYS291 | -0.0530 |
| BACKBONE |         |         |               |    |        |         |
| 685 H    | 9.8170  | 14.1592 | -26.3031 H    | 40 | LYS291 | 0.0265  |
| 686 H    | 11.5969 | 14.1012 | -26.3857 H    | 40 | LYS291 | 0.0265  |
| 687 C    | 10.8108 | 15.4487 | -24.8560 C.3  | 40 | LYS291 | -0.0526 |
| BACKBONE |         |         |               |    |        |         |
| 688 H    | 10.7728 | 16.3278 | -25.5214 H    | 40 | LYS291 | 0.0265  |
| 689 H    | 11.7665 | 15.4811 | -24.3059 H    | 40 | LYS291 | 0.0265  |
| 690 C    | 9.6319  | 15.4996 | -23.8500 C.3  | 40 | LYS291 | -0.0460 |
| BACKBONE |         |         |               |    |        |         |
| 691 H    | 8.6779  | 15.5248 | -24.4009 H    | 40 | LYS291 | 0.0270  |
| 692 H    | 9.7083  | 16.4339 | -23.2772 H    | 40 | LYS291 | 0.0270  |
| 693 N    | 11.8935 | 10.5758 | -10.5902 N.am | 40 | LYS291 | -0.2637 |
| BACKBONE |         |         |               |    |        |         |
| 694 CA   | 10.8153 | 9.5819  | -10.6562 C.3  | 40 | LYS291 | 0.1310  |
| BACKBONE |         |         |               |    |        |         |
| 695 C    | 9.8454  | 9.8009  | -9.5240 C.2   | 40 | LYS291 | 0.2039  |
| BACKBONE |         |         |               |    |        |         |
| 696 O    | 10.2396 | 10.4079 | -8.5439 O.2   | 40 | LYS291 | -0.3944 |
| BACKBONE |         |         |               |    |        |         |
| 697 CB   | 11.3462 | 8.1220  | -10.6578 C.3  | 40 | LYS291 | -0.0123 |
| 698 CG   | 12.4069 | 7.9164  | -11.7740 C.3  | 40 | LYS291 | -0.0474 |
| 699 CD   | 12.7968 | 6.4242  | -11.9413 C.3  | 40 | LYS291 | -0.0358 |
| 700 CE   | 14.0775 | 6.2088  | -12.8034 C.3  | 40 | LYS291 | 0.0287  |
| 701 H1   | 13.5681 | 7.5989  | -14.2859 H    | 40 | LYS291 | 0.1695  |
| 702 H    | 12.3654 | 10.6969 | -9.7171 H     | 40 | LYS291 | 0.1883  |
| 703 HA   | 10.2211 | 9.7349  | -11.5683 H    | 40 | LYS291 | 0.0800  |
| 704 HB3  | 10.5181 | 7.4093  | -10.8048 H    | 40 | LYS291 | 0.0312  |
| 705 HB2  | 11.7957 | 7.9070  | -9.6796 H     | 40 | LYS291 | 0.0312  |
| 706 HG3  | 13.3066 | 8.4949  | -11.5230 H    | 40 | LYS291 | 0.0268  |
| 707 HG2  | 12.0006 | 8.2961  | -12.7230 H    | 40 | LYS291 | 0.0268  |
| 708 HD3  | 11.9508 | 5.8804  | -12.3925 H    | 40 | LYS291 | 0.0281  |
| 709 HD2  | 12.9615 | 6.0174  | -10.9306 H    | 40 | LYS291 | 0.0281  |
| 710 HE3  | 14.9356 | 6.6949  | -12.3163 H    | 40 | LYS291 | 0.0476  |
| 711 HE2  | 14.2896 | 5.1318  | -12.8532 H    | 40 | LYS291 | 0.0476  |
| 712 N    | 8.5782  | 9.3372  | -9.6436 N.am  | 41 | CYS292 | -0.2629 |
| BACKBONE |         |         |               |    |        |         |
| 713 CA   | 7.5976  | 9.5528  | -8.5772 C.3   | 41 | CYS292 | 0.1406  |
| BACKBONE |         |         |               |    |        |         |
| 714 C    | 7.8240  | 8.4869  | -7.5364 C.2   | 41 | CYS292 | 0.2049  |
| BACKBONE |         |         |               |    |        |         |
| 715 O    | 8.1043  | 7.3674  | -7.9324 O.2   | 41 | CYS292 | -0.3943 |
| BACKBONE |         |         |               |    |        |         |
| 716 CB   | 6.1562  | 9.4378  | -9.1318 C.3   | 41 | CYS292 | 0.0443  |
| 717 SG   | 4.8773  | 9.8716  | -7.9145 S.3   | 41 | CYS292 | -0.0882 |
| 718 H    | 8.2967  | 8.8064  | -10.4482 H    | 41 | CYS292 | 0.1884  |
| 719 HA   | 7.7083  | 10.5635 | -8.1661 H     | 41 | CYS292 | 0.0808  |
| 720 HB3  | 5.9923  | 8.3969  | -9.4248 H     | 41 | CYS292 | 0.0432  |
| 721 HB2  | 6.0284  | 10.0888 | -10.0082 H    | 41 | CYS292 | 0.0432  |
| 722 LPG2 | 4.8849  | 9.4603  | -7.3742 LP    | 41 | CYS292 | 0.0000  |

|          |        |         |          |      |    |        |         |
|----------|--------|---------|----------|------|----|--------|---------|
| 723 LPG1 | 4.9250 | 10.5167 | -7.7085  | LP   | 41 | CYS292 | 0.0000  |
| 724 N    | 7.7179 | 8.7719  | -6.2201  | N.am | 42 | PHE293 | -0.2619 |
| BACKBONE |        |         |          |      |    |        |         |
| 725 CA   | 7.9688 | 7.7100  | -5.2482  | C.3  | 42 | PHE293 | 0.1404  |
| BACKBONE |        |         |          |      |    |        |         |
| 726 C    | 6.8866 | 6.6619  | -5.3555  | C.2  | 42 | PHE293 | 0.2060  |
| BACKBONE |        |         |          |      |    |        |         |
| 727 O    | 7.2085 | 5.4835  | -5.3547  | O.2  | 42 | PHE293 | -0.3942 |
| BACKBONE |        |         |          |      |    |        |         |
| 728 CB   | 8.1137 | 8.2195  | -3.7897  | C.3  | 42 | PHE293 | 0.0214  |
| 729 CG   | 6.7749 | 8.5718  | -3.1224  | C.ar | 42 | PHE293 | -0.0386 |
| 730 CD1  | 6.2826 | 9.8807  | -3.1522  | C.ar | 42 | PHE293 | -0.0601 |
| 731 CD2  | 6.0389 | 7.5835  | -2.4566  | C.ar | 42 | PHE293 | -0.0601 |
| 732 CE1  | 5.1142 | 10.2196 | -2.4650  | C.ar | 42 | PHE293 | -0.0686 |
| 733 CE2  | 4.8693 | 7.9163  | -1.7673  | C.ar | 42 | PHE293 | -0.0686 |
| 734 CZ   | 4.4168 | 9.2381  | -1.7557  | C.ar | 42 | PHE293 | -0.0687 |
| 735 H    | 7.4692 | 9.6860  | -5.8982  | H    | 42 | PHE293 | 0.1885  |
| 736 HA   | 8.9371 | 7.2456  | -5.5017  | H    | 42 | PHE293 | 0.0823  |
| 737 HB3  | 8.7861 | 9.0910  | -3.7955  | H    | 42 | PHE293 | 0.0474  |
| 738 HB2  | 8.5863 | 7.4377  | -3.1723  | H    | 42 | PHE293 | 0.0474  |
| 739 HD1  | 6.8096 | 10.6427 | -3.7083  | H    | 42 | PHE293 | 0.0557  |
| 740 HD2  | 6.3750 | 6.5509  | -2.4686  | H    | 42 | PHE293 | 0.0557  |
| 741 HE1  | 4.7538 | 11.2428 | -2.4820  | H    | 42 | PHE293 | 0.0599  |
| 742 HE2  | 4.3129 | 7.1476  | -1.2396  | H    | 42 | PHE293 | 0.0599  |
| 743 HZ   | 3.5272 | 9.4994  | -1.1949  | H    | 42 | PHE293 | 0.0559  |
| 744 N    | 5.5988 | 7.0699  | -5.4520  | N.am | 43 | SER294 | -0.2614 |
| BACKBONE |        |         |          |      |    |        |         |
| 745 CA   | 4.5256 | 6.0802  | -5.4923  | C.3  | 43 | SER294 | 0.1539  |
| BACKBONE |        |         |          |      |    |        |         |
| 746 C    | 4.4030 | 5.4684  | -6.8719  | C.2  | 43 | SER294 | 0.2062  |
| BACKBONE |        |         |          |      |    |        |         |
| 747 O    | 4.5759 | 4.2653  | -6.9903  | O.2  | 43 | SER294 | -0.3943 |
| BACKBONE |        |         |          |      |    |        |         |
| 748 CB   | 3.1774 | 6.6853  | -5.0220  | C.3  | 43 | SER294 | 0.0843  |
| 749 OG   | 2.1996 | 5.6330  | -4.9756  | O.3  | 43 | SER294 | -0.3903 |
| 750 H    | 5.3576 | 8.0425  | -5.4916  | H    | 43 | SER294 | 0.1884  |
| 751 HA   | 4.7542 | 5.2815  | -4.7640  | H    | 43 | SER294 | 0.0823  |
| 752 HB3  | 2.8453 | 7.4868  | -5.7014  | H    | 43 | SER294 | 0.0606  |
| 753 HB2  | 3.3112 | 7.1162  | -4.0152  | H    | 43 | SER294 | 0.0606  |
| 754 HG   | 1.3595 | 5.9318  | -4.6451  | H    | 43 | SER294 | 0.2097  |
| 755 N    | 4.0957 | 6.2621  | -7.9264  | N.am | 44 | CYS295 | -0.2628 |
| BACKBONE |        |         |          |      |    |        |         |
| 756 CA   | 3.8504 | 5.6815  | -9.2486  | C.3  | 44 | CYS295 | 0.1406  |
| BACKBONE |        |         |          |      |    |        |         |
| 757 C    | 5.0999 | 5.3105  | -10.0175 | C.2  | 44 | CYS295 | 0.2048  |
| BACKBONE |        |         |          |      |    |        |         |
| 758 O    | 4.9482 | 4.7101  | -11.0705 | O.2  | 44 | CYS295 | -0.3944 |
| BACKBONE |        |         |          |      |    |        |         |
| 759 CB   | 2.9185 | 6.5756  | -10.1178 | C.3  | 44 | CYS295 | 0.0443  |
| 760 SG   | 3.6109 | 8.1785  | -10.6761 | S.3  | 44 | CYS295 | -0.0882 |
| 761 H    | 4.0137 | 7.2496  | -7.8187  | H    | 44 | CYS295 | 0.1884  |
| 762 HA   | 3.2955 | 4.7371  | -9.1030  | H    | 44 | CYS295 | 0.0808  |

|          |         |         |          |       |    |        |         |
|----------|---------|---------|----------|-------|----|--------|---------|
| 763 HB3  | 1.9960  | 6.7436  | -9.5549  | H     | 44 | CYS295 | 0.0432  |
| 764 HB2  | 2.6516  | 6.0341  | -11.0392 | H     | 44 | CYS295 | 0.0432  |
| 765 LPG2 | 4.2807  | 8.1249  | -10.7743 | LP    | 44 | CYS295 | 0.0000  |
| 766 LPG1 | 3.3128  | 8.3762  | -11.2532 | LP    | 44 | CYS295 | 0.0000  |
| 767 N    | 6.3279  | 5.6406  | -9.5522  | N.am  | 45 | ASP296 | -0.2621 |
| BACKBONE |         |         |          |       |    |        |         |
| 768 CA   | 7.5268  | 5.3064  | -10.3268 | C.3   | 45 | ASP296 | 0.1423  |
| BACKBONE |         |         |          |       |    |        |         |
| 769 C    | 7.4202  | 5.6792  | -11.7921 | C.2   | 45 | ASP296 | 0.2054  |
| BACKBONE |         |         |          |       |    |        |         |
| 770 O    | 8.0548  | 5.0379  | -12.6142 | O.2   | 45 | ASP296 | -0.3943 |
| BACKBONE |         |         |          |       |    |        |         |
| 771 CB   | 7.8805  | 3.8137  | -10.0992 | C.3   | 45 | ASP296 | 0.0406  |
| 772 CG   | 9.2402  | 3.4709  | -10.6574 | C.2   | 45 | ASP296 | 0.0393  |
| 773 OD1  | 10.2503 | 4.0349  | -10.1535 | O.co2 | 45 | ASP296 | -0.5688 |
| 774 OD2  | 9.3132  | 2.6395  | -11.6037 | O.co2 | 45 | ASP296 | -0.5688 |
| 775 H    | 6.4505  | 6.0950  | -8.6669  | H     | 45 | ASP296 | 0.1884  |
| 776 HA   | 8.3728  | 5.9065  | -9.9540  | H     | 45 | ASP296 | 0.0819  |
| 777 HB3  | 7.1038  | 3.1813  | -10.5573 | H     | 45 | ASP296 | 0.0478  |
| 778 HB2  | 7.8928  | 3.6076  | -9.0169  | H     | 45 | ASP296 | 0.0478  |
| 779 N    | 6.6379  | 6.7312  | -12.1293 | N.am  | 46 | GLY297 | -0.2663 |
| BACKBONE |         |         |          |       |    |        |         |
| 780 CA   | 6.6475  | 7.3001  | -13.4727 | C.3   | 46 | GLY297 | 0.1201  |
| BACKBONE |         |         |          |       |    |        |         |
| 781 C    | 7.5409  | 8.5077  | -13.3582 | C.2   | 46 | GLY297 | 0.2005  |
| BACKBONE |         |         |          |       |    |        |         |
| 782 O    | 7.6348  | 9.0334  | -12.2595 | O.2   | 46 | GLY297 | -0.3947 |
| BACKBONE |         |         |          |       |    |        |         |
| 783 H    | 6.1230  | 7.2389  | -11.4446 | H     | 46 | GLY297 | 0.1881  |
| 784 HA2  | 5.6343  | 7.6213  | -13.7623 | H     | 46 | GLY297 | 0.0763  |
| 785 HA3  | 7.0176  | 6.5936  | -14.2323 | H     | 46 | GLY297 | 0.0763  |
| 786 N    | 8.2066  | 8.9655  | -14.4416 | N.am  | 47 | GLY298 | -0.2666 |
| BACKBONE |         |         |          |       |    |        |         |
| 787 CA   | 9.2029  | 10.0165 | -14.2753 | C.3   | 47 | GLY298 | 0.1201  |
| BACKBONE |         |         |          |       |    |        |         |
| 788 C    | 9.3238  | 10.9138 | -15.4760 | C.2   | 47 | GLY298 | 0.2007  |
| BACKBONE |         |         |          |       |    |        |         |
| 789 O    | 8.7519  | 10.6068 | -16.5092 | O.2   | 47 | GLY298 | -0.3947 |
| BACKBONE |         |         |          |       |    |        |         |
| 790 H    | 8.0960  | 8.5476  | -15.3435 | H     | 47 | GLY298 | 0.1881  |
| 791 HA2  | 10.1680 | 9.5388  | -14.0707 | H     | 47 | GLY298 | 0.0763  |
| 792 HA3  | 8.9459  | 10.6740 | -13.4292 | H     | 47 | GLY298 | 0.0763  |
| 793 N    | 10.0560 | 12.0414 | -15.3075 | N.am  | 48 | LEU299 | -0.2640 |
| BACKBONE |         |         |          |       |    |        |         |
| 794 CA   | 9.9872  | 13.1409 | -16.2652 | C.3   | 48 | LEU299 | 0.1312  |
| BACKBONE |         |         |          |       |    |        |         |
| 795 C    | 11.3801 | 13.6765 | -16.5387 | C.2   | 48 | LEU299 | 0.2039  |
| BACKBONE |         |         |          |       |    |        |         |
| 796 O    | 12.2232 | 13.5313 | -15.6675 | O.2   | 48 | LEU299 | -0.3944 |
| BACKBONE |         |         |          |       |    |        |         |
| 797 CB   | 9.1204  | 14.2404 | -15.5772 | C.3   | 48 | LEU299 | -0.0101 |
| 798 CG   | 7.7344  | 13.7516 | -15.0365 | C.3   | 48 | LEU299 | -0.0425 |

|          |      |         |         |          |       |    |        |         |
|----------|------|---------|---------|----------|-------|----|--------|---------|
| 799      | CD1  | 7.0822  | 14.8236 | -14.1189 | C.3   | 48 | LEU299 | -0.0625 |
| 800      | CD2  | 6.7473  | 13.3982 | -16.1810 | C.3   | 48 | LEU299 | -0.0625 |
| 801      | H    | 10.5648 | 12.2058 | -14.4588 | H     | 48 | LEU299 | 0.1883  |
| 802      | HA   | 9.5412  | 12.8185 | -17.2183 | H     | 48 | LEU299 | 0.0800  |
| 803      | HB3  | 8.9857  | 15.0966 | -16.2540 | H     | 48 | LEU299 | 0.0315  |
| 804      | HB2  | 9.7030  | 14.5980 | -14.7160 | H     | 48 | LEU299 | 0.0315  |
| 805      | HG   | 7.8657  | 12.8579 | -14.4056 | H     | 48 | LEU299 | 0.0298  |
| 806      | HD13 | 7.6913  | 14.9892 | -13.2173 | H     | 48 | LEU299 | 0.0232  |
| 807      | HD12 | 6.0795  | 14.5044 | -13.7976 | H     | 48 | LEU299 | 0.0232  |
| 808      | HD11 | 6.9773  | 15.7736 | -14.6571 | H     | 48 | LEU299 | 0.0232  |
| 809      | HD23 | 6.5758  | 14.2912 | -16.7919 | H     | 48 | LEU299 | 0.0232  |
| 810      | HD22 | 5.7751  | 13.0723 | -15.7811 | H     | 48 | LEU299 | 0.0232  |
| 811      | HD21 | 7.1365  | 12.5962 | -16.8214 | H     | 48 | LEU299 | 0.0232  |
| 812      | N    | 11.6468 | 14.3002 | -17.7150 | N.am  | 49 | ARG300 | -0.2637 |
| BACKBONE |      |         |         |          |       |    |        |         |
| 813      | CA   | 12.9604 | 14.9086 | -17.9582 | C.3   | 49 | ARG300 | 0.1311  |
| BACKBONE |      |         |         |          |       |    |        |         |
| 814      | C    | 12.8612 | 16.0008 | -19.0036 | C.2   | 49 | ARG300 | 0.2039  |
| BACKBONE |      |         |         |          |       |    |        |         |
| 815      | O    | 11.7881 | 16.1631 | -19.5598 | O.2   | 49 | ARG300 | -0.3944 |
| BACKBONE |      |         |         |          |       |    |        |         |
| 816      | CB   | 14.0322 | 13.8588 | -18.3745 | C.3   | 49 | ARG300 | -0.0092 |
| 817      | CG   | 13.8171 | 13.2791 | -19.8035 | C.3   | 49 | ARG300 | -0.0156 |
| 818      | CD   | 15.1319 | 12.6800 | -20.3815 | C.3   | 49 | ARG300 | 0.0627  |
| 819      | NE   | 15.6886 | 11.6209 | -19.5316 | N.pl3 | 49 | ARG300 | -0.2723 |
| 820      | CZ   | 15.3744 | 10.3437 | -19.6217 | C.cat | 49 | ARG300 | 0.2882  |
| 821      | NH1  | 14.4531 | 9.8779  | -20.4337 | N.pl3 | 49 | ARG300 | -0.2849 |
| 822      | NH2  | 16.0149 | 9.4822  | -18.8620 | N.pl3 | 49 | ARG300 | -0.2849 |
| 823      | H    | 10.9536 | 14.3691 | -18.4357 | H     | 49 | ARG300 | 0.1883  |
| 824      | HA   | 13.2904 | 15.4077 | -17.0310 | H     | 49 | ARG300 | 0.0800  |
| 825      | HB3  | 14.0412 | 13.0401 | -17.6419 | H     | 49 | ARG300 | 0.0313  |
| 826      | HB2  | 15.0244 | 14.3319 | -18.3304 | H     | 49 | ARG300 | 0.0313  |
| 827      | HG3  | 13.4821 | 14.0662 | -20.4958 | H     | 49 | ARG300 | 0.0301  |
| 828      | HG2  | 13.0254 | 12.5185 | -19.7727 | H     | 49 | ARG300 | 0.0301  |
| 829      | HD3  | 15.8738 | 13.4965 | -20.4284 | H     | 49 | ARG300 | 0.0689  |
| 830      | HD2  | 15.0131 | 12.3633 | -21.4291 | H     | 49 | ARG300 | 0.0689  |
| 831      | HE   | 16.4196 | 11.9059 | -18.8596 | H     | 49 | ARG300 | 0.2642  |
| 832      | HH11 | 13.8965 | 10.4966 | -21.0325 | H     | 49 | ARG300 | 0.2615  |
| 833      | HH12 | 14.2525 | 8.8673  | -20.4826 | H     | 49 | ARG300 | 0.2615  |
| 834      | HH21 | 16.7451 | 9.7897  | -18.2018 | H     | 49 | ARG300 | 0.2615  |
| 835      | HH22 | 15.8089 | 8.4726  | -18.9085 | H     | 49 | ARG300 | 0.2615  |
| 836      | N    | 13.9566 | 16.7442 | -19.2920 | N.am  | 50 | CYS301 | -0.2629 |
| BACKBONE |      |         |         |          |       |    |        |         |
| 837      | CA   | 13.8956 | 17.8216 | -20.2804 | C.3   | 50 | CYS301 | 0.1396  |
| BACKBONE |      |         |         |          |       |    |        |         |
| 838      | C    | 12.8880 | 18.8527 | -19.8307 | C.2   | 50 | CYS301 | 0.2048  |
| BACKBONE |      |         |         |          |       |    |        |         |
| 839      | O    | 12.0976 | 19.3155 | -20.6354 | O.2   | 50 | CYS301 | -0.3944 |
| BACKBONE |      |         |         |          |       |    |        |         |
| 840      | CB   | 13.6264 | 17.2789 | -21.7107 | C.3   | 50 | CYS301 | 0.0311  |
| 841      | SG   | 14.9022 | 16.0391 | -22.1092 | S.o   | 50 | CYS301 | -0.1735 |
| 842      | H    | 14.8282 | 16.5889 | -18.8252 | H     | 50 | CYS301 | 0.1884  |

|          |         |         |                |    |        |         |
|----------|---------|---------|----------------|----|--------|---------|
| 843 HA   | 14.8664 | 18.3466 | -20.3124 H     | 50 | CYS301 | 0.0808  |
| 844 HB3  | 13.6828 | 18.0962 | -22.4481 H     | 50 | CYS301 | 0.0422  |
| 845 HB2  | 12.6327 | 16.8115 | -21.7861 H     | 50 | CYS301 | 0.0422  |
| 846 LPG2 | 15.5251 | 16.3088 | -22.1270 LP    | 50 | CYS301 | 0.0000  |
| 847 LPG1 | 14.8945 | 15.5153 | -21.6770 LP    | 50 | CYS301 | 0.0000  |
| 848 HG   | 14.5728 | 15.7798 | -23.0279 H     | 50 | CYS301 | 0.1019  |
| 849 N    | 12.9120 | 19.2300 | -18.5325 N.am  | 51 | TRP302 | -0.2626 |
| BACKBONE |         |         |                |    |        |         |
| 850 CA   | 11.9339 | 20.1916 | -18.0228 C.3   | 51 | TRP302 | 0.1352  |
| BACKBONE |         |         |                |    |        |         |
| 851 C    | 12.0172 | 21.4890 | -18.7983 C.2   | 51 | TRP302 | 0.2052  |
| BACKBONE |         |         |                |    |        |         |
| 852 O    | 13.0410 | 21.7338 | -19.4171 O.2   | 51 | TRP302 | -0.3942 |
| BACKBONE |         |         |                |    |        |         |
| 853 CB   | 12.1453 | 20.4697 | -16.5109 C.3   | 51 | TRP302 | 0.0042  |
| 854 CG   | 11.7852 | 19.2756 | -15.6649 C.2   | 51 | TRP302 | -0.0418 |
| 855 CD1  | 12.5534 | 18.2254 | -15.3284 C.2   | 51 | TRP302 | 0.0167  |
| 856 CD2  | 10.4446 | 19.0561 | -15.0132 C.ar  | 51 | TRP302 | -0.0214 |
| 857 NE1  | 11.8723 | 17.4052 | -14.5696 N.pl3 | 51 | TRP302 | -0.2890 |
| 858 CE2  | 10.6272 | 17.8640 | -14.3412 C.ar  | 51 | TRP302 | 0.0603  |
| 859 CE3  | 9.2410  | 19.7559 | -14.9730 C.ar  | 51 | TRP302 | -0.0747 |
| 860 CZ2  | 9.6176  | 17.3112 | -13.5571 C.ar  | 51 | TRP302 | -0.0443 |
| 861 CZ3  | 8.2373  | 19.2431 | -14.1418 C.ar  | 51 | TRP302 | -0.0792 |
| 862 CH2  | 8.4209  | 18.0313 | -13.4549 C.ar  | 51 | TRP302 | -0.0768 |
| 863 H    | 13.6012 | 18.8557 | -17.9122 H     | 51 | TRP302 | 0.1884  |
| 864 HA   | 10.9280 | 19.7631 | -18.1566 H     | 51 | TRP302 | 0.0815  |
| 865 HB3  | 11.5397 | 21.3268 | -16.1771 H     | 51 | TRP302 | 0.0397  |
| 866 HB2  | 13.2000 | 20.7212 | -16.3475 H     | 51 | TRP302 | 0.0397  |
| 867 HD1  | 13.5850 | 18.0687 | -15.6306 H     | 51 | TRP302 | 0.0795  |
| 868 HE1  | 12.2454 | 16.5240 | -14.1849 H     | 51 | TRP302 | 0.2216  |
| 869 HE3  | 9.0990  | 20.6521 | -15.5627 H     | 51 | TRP302 | 0.0540  |
| 870 HZ2  | 9.7600  | 16.3733 | -13.0398 H     | 51 | TRP302 | 0.0541  |
| 871 HZ3  | 7.3059  | 19.7904 | -14.0357 H     | 51 | TRP302 | 0.0510  |
| 872 HH2  | 7.6310  | 17.6338 | -12.8294 H     | 51 | TRP302 | 0.0530  |
| 873 N    | 10.9435 | 22.3174 | -18.7768 N.am  | 52 | GLU303 | -0.2635 |
| BACKBONE |         |         |                |    |        |         |
| 874 CA   | 10.9140 | 23.5552 | -19.5608 C.3   | 52 | GLU303 | 0.1325  |
| BACKBONE |         |         |                |    |        |         |
| 875 C    | 10.3527 | 24.6741 | -18.7142 C.2   | 52 | GLU303 | 0.2041  |
| BACKBONE |         |         |                |    |        |         |
| 876 O    | 9.7945  | 24.3979 | -17.6637 O.2   | 52 | GLU303 | -0.3944 |
| BACKBONE |         |         |                |    |        |         |
| 877 CB   | 10.0004 | 23.3699 | -20.8048 C.3   | 52 | GLU303 | -0.0008 |
| 878 CG   | 10.6403 | 22.4498 | -21.8768 C.3   | 52 | GLU303 | 0.0044  |
| 879 CD   | 9.6442  | 22.1514 | -22.9703 C.2   | 52 | GLU303 | 0.0350  |
| 880 OE1  | 9.1445  | 23.1222 | -23.6019 O.co2 | 52 | GLU303 | -0.5690 |
| 881 OE2  | 9.3485  | 20.9478 | -23.2068 O.co2 | 52 | GLU303 | -0.5690 |
| 882 H    | 10.1221 | 22.0867 | -18.2485 H     | 52 | GLU303 | 0.1883  |
| 883 HA   | 11.9223 | 23.8633 | -19.8828 H     | 52 | GLU303 | 0.0801  |
| 884 HB3  | 9.7867  | 24.3432 | -21.2756 H     | 52 | GLU303 | 0.0330  |
| 885 HB2  | 9.0423  | 22.9398 | -20.4752 H     | 52 | GLU303 | 0.0330  |
| 886 HG3  | 10.9746 | 21.5100 | -21.4157 H     | 52 | GLU303 | 0.0433  |

|          |         |         |          |       |    |        |         |
|----------|---------|---------|----------|-------|----|--------|---------|
| 887 HG2  | 11.5209 | 22.9427 | -22.3185 | H     | 52 | GLU303 | 0.0433  |
| 888 N    | 10.4862 | 25.9438 | -19.1668 | N.am  | 53 | SER304 | -0.2616 |
| BACKBONE |         |         |          |       |    |        |         |
| 889 CA   | 9.9075  | 27.0490 | -18.4089 | C.3   | 53 | SER304 | 0.1539  |
| BACKBONE |         |         |          |       |    |        |         |
| 890 C    | 8.4032  | 26.9413 | -18.4384 | C.2   | 53 | SER304 | 0.2060  |
| BACKBONE |         |         |          |       |    |        |         |
| 891 O    | 7.8793  | 26.4008 | -19.3998 | O.2   | 53 | SER304 | -0.3943 |
| BACKBONE |         |         |          |       |    |        |         |
| 892 CB   | 10.3362 | 28.4314 | -18.9611 | C.3   | 53 | SER304 | 0.0843  |
| 893 OG   | 9.7560  | 29.4669 | -18.1497 | O.3   | 53 | SER304 | -0.3903 |
| 894 H    | 10.9542 | 26.1458 | -20.0300 | H     | 53 | SER304 | 0.1884  |
| 895 HA   | 10.2525 | 26.9782 | -17.3673 | H     | 53 | SER304 | 0.0823  |
| 896 HB3  | 9.9908  | 28.5286 | -20.0043 | H     | 53 | SER304 | 0.0606  |
| 897 HB2  | 11.4370 | 28.5048 | -18.9417 | H     | 53 | SER304 | 0.0606  |
| 898 HG   | 9.9871  | 30.3399 | -18.4517 | H     | 53 | SER304 | 0.2097  |
| 899 N    | 7.6964  | 27.4352 | -17.3934 | N.am  | 54 | GLY305 | -0.2663 |
| BACKBONE |         |         |          |       |    |        |         |
| 900 CA   | 6.2377  | 27.3410 | -17.3717 | C.3   | 54 | GLY305 | 0.1201  |
| BACKBONE |         |         |          |       |    |        |         |
| 901 C    | 5.7370  | 26.0388 | -16.7869 | C.2   | 54 | GLY305 | 0.2008  |
| BACKBONE |         |         |          |       |    |        |         |
| 902 O    | 4.6489  | 26.0464 | -16.2318 | O.2   | 54 | GLY305 | -0.3947 |
| BACKBONE |         |         |          |       |    |        |         |
| 903 H    | 8.1536  | 27.8524 | -16.6038 | H     | 54 | GLY305 | 0.1881  |
| 904 HA2  | 5.8218  | 27.4448 | -18.3862 | H     | 54 | GLY305 | 0.0763  |
| 905 HA3  | 5.8349  | 28.1754 | -16.7729 | H     | 54 | GLY305 | 0.0763  |
| 906 N    | 6.4688  | 24.9048 | -16.9037 | N.am  | 55 | ASP306 | -0.2624 |
| BACKBONE |         |         |          |       |    |        |         |
| 907 CA   | 5.9309  | 23.6407 | -16.4023 | C.3   | 55 | ASP306 | 0.1423  |
| BACKBONE |         |         |          |       |    |        |         |
| 908 C    | 5.7063  | 23.7082 | -14.9085 | C.2   | 55 | ASP306 | 0.2057  |
| BACKBONE |         |         |          |       |    |        |         |
| 909 O    | 6.3836  | 24.4803 | -14.2485 | O.2   | 55 | ASP306 | -0.3943 |
| BACKBONE |         |         |          |       |    |        |         |
| 910 CB   | 6.8654  | 22.4389 | -16.7046 | C.3   | 55 | ASP306 | 0.0406  |
| 911 CG   | 6.9751  | 22.1686 | -18.1842 | C.2   | 55 | ASP306 | 0.0393  |
| 912 OD1  | 6.9302  | 23.1497 | -18.9761 | O.co2 | 55 | ASP306 | -0.5688 |
| 913 OD2  | 7.1041  | 20.9724 | -18.5674 | O.co2 | 55 | ASP306 | -0.5688 |
| 914 H    | 7.3630  | 24.8922 | -17.3502 | H     | 55 | ASP306 | 0.1884  |
| 915 HA   | 4.9699  | 23.4568 | -16.9119 | H     | 55 | ASP306 | 0.0819  |
| 916 HB3  | 6.4866  | 21.5349 | -16.2008 | H     | 55 | ASP306 | 0.0478  |
| 917 HB2  | 7.8698  | 22.6597 | -16.3154 | H     | 55 | ASP306 | 0.0478  |
| 918 N    | 4.7548  | 22.8991 | -14.3815 | N.am  | 56 | ASP307 | -0.2621 |
| BACKBONE |         |         |          |       |    |        |         |
| 919 CA   | 4.4820  | 22.8612 | -12.9449 | C.3   | 56 | ASP307 | 0.1425  |
| BACKBONE |         |         |          |       |    |        |         |
| 920 C    | 4.4370  | 21.3976 | -12.5495 | C.2   | 56 | ASP307 | 0.2081  |
| BACKBONE |         |         |          |       |    |        |         |
| 921 O    | 3.5514  | 20.7286 | -13.0572 | O.2   | 56 | ASP307 | -0.3941 |
| BACKBONE |         |         |          |       |    |        |         |
| 922 CB   | 3.1217  | 23.5432 | -12.6575 | C.3   | 56 | ASP307 | 0.0406  |



|          |     |         |         |          |       |    |        |         |
|----------|-----|---------|---------|----------|-------|----|--------|---------|
| 923      | CG  | 2.7546  | 23.3434 | -11.2086 | C.2   | 56 | ASP307 | 0.0393  |
| 924      | OD1 | 2.1533  | 22.2819 | -10.8881 | O.co2 | 56 | ASP307 | -0.5688 |
| 925      | OD2 | 3.0708  | 24.2397 | -10.3791 | O.co2 | 56 | ASP307 | -0.5688 |
| 926      | H   | 4.2056  | 22.2967 | -14.9663 | H     | 56 | ASP307 | 0.1884  |
| 927      | HA  | 5.2221  | 23.4353 | -12.3696 | H     | 56 | ASP307 | 0.0819  |
| 928      | HB3 | 2.3409  | 23.1124 | -13.2981 | H     | 56 | ASP307 | 0.0478  |
| 929      | HB2 | 3.1862  | 24.6182 | -12.8924 | H     | 56 | ASP307 | 0.0478  |
| 930      | N   | 5.3311  | 20.8322 | -11.7004 | N.am  | 57 | PRO308 | -0.2497 |
| BACKBONE |     |         |         |          |       |    |        |         |
| 931      | CA  | 5.2705  | 19.4063 | -11.4127 | C.3   | 57 | PRO308 | 0.1338  |
| BACKBONE |     |         |         |          |       |    |        |         |
| 932      | C   | 3.9201  | 18.7847 | -11.1583 | C.2   | 57 | PRO308 | 0.2042  |
| BACKBONE |     |         |         |          |       |    |        |         |
| 933      | O   | 3.6881  | 17.7108 | -11.6885 | O.2   | 57 | PRO308 | -0.3944 |
| BACKBONE |     |         |         |          |       |    |        |         |
| 934      | CB  | 6.1909  | 19.3496 | -10.1744 | C.3   | 57 | PRO308 | -0.0104 |
| 935      | CG  | 7.2516  | 20.4203 | -10.4980 | C.3   | 57 | PRO308 | -0.0281 |
| 936      | CD  | 6.4274  | 21.5822 | -11.1002 | C.3   | 57 | PRO308 | 0.0369  |
| 937      | HA  | 5.7387  | 18.8927 | -12.2633 | H     | 57 | PRO308 | 0.0802  |
| 938      | HB3 | 6.6295  | 18.3519 | -10.0278 | H     | 57 | PRO308 | 0.0313  |
| 939      | HB2 | 5.6419  | 19.6516 | -9.2675  | H     | 57 | PRO308 | 0.0313  |
| 940      | HG2 | 7.8646  | 20.7096 | -9.6314  | H     | 57 | PRO308 | 0.0287  |
| 941      | HG3 | 7.9070  | 20.0027 | -11.2767 | H     | 57 | PRO308 | 0.0287  |
| 942      | HD2 | 6.0410  | 22.2538 | -10.3177 | H     | 57 | PRO308 | 0.0524  |
| 943      | HD3 | 7.0421  | 22.1404 | -11.8248 | H     | 57 | PRO308 | 0.0524  |
| 944      | N   | 3.0133  | 19.4027 | -10.3717 | N.am  | 58 | TRP309 | -0.2627 |
| BACKBONE |     |         |         |          |       |    |        |         |
| 945      | CA  | 1.7150  | 18.7649 | -10.1529 | C.3   | 58 | TRP309 | 0.1352  |
| BACKBONE |     |         |         |          |       |    |        |         |
| 946      | C   | 0.9736  | 18.6295 | -11.4654 | C.2   | 58 | TRP309 | 0.2052  |
| BACKBONE |     |         |         |          |       |    |        |         |
| 947      | O   | 0.4294  | 17.5694 | -11.7337 | O.2   | 58 | TRP309 | -0.3942 |
| BACKBONE |     |         |         |          |       |    |        |         |
| 948      | CB  | 0.8136  | 19.5681 | -9.1854  | C.3   | 58 | TRP309 | 0.0042  |
| 949      | CG  | 1.3831  | 19.6339 | -7.7941  | C.2   | 58 | TRP309 | -0.0418 |
| 950      | CD1 | 2.0097  | 20.6638 | -7.2016  | C.2   | 58 | TRP309 | 0.0167  |
| 951      | CD2 | 1.3223  | 18.5207 | -6.7812  | C.ar  | 58 | TRP309 | -0.0214 |
| 952      | NE1 | 2.3128  | 20.3390 | -5.9693  | N.pl3 | 58 | TRP309 | -0.2890 |
| 953      | CE2 | 1.8972  | 19.0937 | -5.6649  | C.ar  | 58 | TRP309 | 0.0603  |
| 954      | CE3 | 0.8430  | 17.2142 | -6.7837  | C.ar  | 58 | TRP309 | -0.0747 |
| 955      | CZ2 | 1.9683  | 18.4075 | -4.4530  | C.ar  | 58 | TRP309 | -0.0443 |
| 956      | CZ3 | 0.9239  | 16.5044 | -5.5792  | C.ar  | 58 | TRP309 | -0.0792 |
| 957      | CH2 | 1.4617  | 17.1006 | -4.4271  | C.ar  | 58 | TRP309 | -0.0768 |
| 958      | H   | 3.2114  | 20.2892 | -9.9491  | H     | 58 | TRP309 | 0.1884  |
| 959      | HA  | 1.8808  | 17.7640 | -9.7192  | H     | 58 | TRP309 | 0.0815  |
| 960      | HB3 | -0.1657 | 19.0679 | -9.1283  | H     | 58 | TRP309 | 0.0397  |
| 961      | HB2 | 0.6576  | 20.5880 | -9.5668  | H     | 58 | TRP309 | 0.0397  |
| 962      | HD1 | 2.2237  | 21.6220 | -7.6753  | H     | 58 | TRP309 | 0.0795  |
| 963      | HE1 | 2.7964  | 20.9649 | -5.3081  | H     | 58 | TRP309 | 0.2216  |
| 964      | HE3 | 0.4297  | 16.7842 | -7.6838  | H     | 58 | TRP309 | 0.0540  |
| 965      | HZ2 | 2.3922  | 18.8685 | -3.5688  | H     | 58 | TRP309 | 0.0541  |
| 966      | HZ3 | 0.5677  | 15.4803 | -5.5391  | H     | 58 | TRP309 | 0.0510  |

|          |      |         |         |          |       |    |        |         |
|----------|------|---------|---------|----------|-------|----|--------|---------|
| 967      | HH2  | 1.4907  | 16.5413 | -3.4982  | H     | 58 | TRP309 | 0.0530  |
| 968      | N    | 0.9438  | 19.7003 | -12.2927 | N.am  | 59 | VAL310 | -0.2634 |
| BACKBONE |      |         |         |          |       |    |        |         |
| 969      | CA   | 0.2455  | 19.6222 | -13.5776 | C.3   | 59 | VAL310 | 0.1333  |
| BACKBONE |      |         |         |          |       |    |        |         |
| 970      | C    | 0.8037  | 18.4571 | -14.3555 | C.2   | 59 | VAL310 | 0.2042  |
| BACKBONE |      |         |         |          |       |    |        |         |
| 971      | O    | 0.0407  | 17.7000 | -14.9336 | O.2   | 59 | VAL310 | -0.3944 |
| BACKBONE |      |         |         |          |       |    |        |         |
| 972      | CB   | 0.4101  | 20.9225 | -14.4246 | C.3   | 59 | VAL310 | -0.0063 |
| 973      | CG1  | -0.0776 | 20.7316 | -15.8882 | C.3   | 59 | VAL310 | -0.0584 |
| 974      | CG2  | -0.3524 | 22.1108 | -13.7712 | C.3   | 59 | VAL310 | -0.0584 |
| 975      | H    | 1.4201  | 20.5449 | -12.0441 | H     | 59 | VAL310 | 0.1883  |
| 976      | HA   | -0.8270 | 19.4451 | -13.3990 | H     | 59 | VAL310 | 0.0802  |
| 977      | HB   | 1.4819  | 21.1685 | -14.4856 | H     | 59 | VAL310 | 0.0343  |
| 978      | HG13 | 0.5189  | 19.9772 | -16.4244 | H     | 59 | VAL310 | 0.0234  |
| 979      | HG12 | -0.0012 | 21.6757 | -16.4494 | H     | 59 | VAL310 | 0.0234  |
| 980      | HG11 | -1.1269 | 20.4125 | -15.8831 | H     | 59 | VAL310 | 0.0234  |
| 981      | HG23 | -1.4323 | 21.9083 | -13.7581 | H     | 59 | VAL310 | 0.0234  |
| 982      | HG22 | -0.1812 | 23.0357 | -14.3434 | H     | 59 | VAL310 | 0.0234  |
| 983      | HG21 | -0.0285 | 22.2879 | -12.7359 | H     | 59 | VAL310 | 0.0234  |
| 984      | N    | 2.1448  | 18.3137 | -14.3862 | N.am  | 60 | GLU311 | -0.2636 |
| BACKBONE |      |         |         |          |       |    |        |         |
| 985      | CA   | 2.7478  | 17.2629 | -15.1994 | C.3   | 60 | GLU311 | 0.1325  |
| BACKBONE |      |         |         |          |       |    |        |         |
| 986      | C    | 2.5145  | 15.9003 | -14.5806 | C.2   | 60 | GLU311 | 0.2043  |
| BACKBONE |      |         |         |          |       |    |        |         |
| 987      | O    | 2.3179  | 14.9459 | -15.3166 | O.2   | 60 | GLU311 | -0.3944 |
| BACKBONE |      |         |         |          |       |    |        |         |
| 988      | CB   | 4.2503  | 17.5758 | -15.4356 | C.3   | 60 | GLU311 | -0.0008 |
| 989      | CG   | 4.4264  | 18.9014 | -16.2352 | C.3   | 60 | GLU311 | 0.0044  |
| 990      | CD   | 3.7342  | 18.8649 | -17.5757 | C.2   | 60 | GLU311 | 0.0350  |
| 991      | OE1  | 3.8329  | 17.8180 | -18.2690 | O.co2 | 60 | GLU311 | -0.5690 |
| 992      | OE2  | 3.0819  | 19.8778 | -17.9493 | O.co2 | 60 | GLU311 | -0.5690 |
| 993      | H    | 2.7368  | 18.9175 | -13.8491 | H     | 60 | GLU311 | 0.1883  |
| 994      | HA   | 2.2501  | 17.2620 | -16.1801 | H     | 60 | GLU311 | 0.0801  |
| 995      | HB3  | 4.7058  | 16.7439 | -15.9907 | H     | 60 | GLU311 | 0.0330  |
| 996      | HB2  | 4.7703  | 17.6499 | -14.4667 | H     | 60 | GLU311 | 0.0330  |
| 997      | HG3  | 5.4920  | 19.0953 | -16.4179 | H     | 60 | GLU311 | 0.0433  |
| 998      | HG2  | 4.0395  | 19.7515 | -15.6537 | H     | 60 | GLU311 | 0.0433  |
| 999      | N    | 2.5089  | 15.7827 | -13.2334 | N.am  | 61 | HIS312 | -0.2587 |
| BACKBONE |      |         |         |          |       |    |        |         |
| 1000     | CA   | 2.2211  | 14.4925 | -12.5974 | C.3   | 61 | HIS312 | 0.1612  |
| BACKBONE |      |         |         |          |       |    |        |         |
| 1001     | C    | 0.8783  | 14.0102 | -13.1084 | C.2   | 61 | HIS312 | 0.2098  |
| BACKBONE |      |         |         |          |       |    |        |         |
| 1002     | O    | 0.7390  | 12.8356 | -13.4124 | O.2   | 61 | HIS312 | -0.3939 |
| BACKBONE |      |         |         |          |       |    |        |         |
| 1003     | CB   | 2.2219  | 14.6318 | -11.0425 | C.3   | 61 | HIS312 | 0.1055  |
| 1004     | CG   | 2.4695  | 13.3921 | -10.2100 | C.2   | 61 | HIS312 | 0.1973  |
| 1005     | ND1  | 2.5983  | 13.4560 | -8.9007  | N.pl3 | 61 | HIS312 | -0.1586 |
| 1006     | CD2  | 2.6140  | 12.1161 | -10.6243 | C.2   | 61 | HIS312 | 0.1263  |

|          |     |         |         |          |       |    |        |         |
|----------|-----|---------|---------|----------|-------|----|--------|---------|
| 1007     | CE1 | 2.8399  | 12.2759 | -8.4231  | C.cat | 61 | HIS312 | 0.1842  |
| 1008     | NE2 | 2.8596  | 11.4564 | -9.3701  | N.2   | 61 | HIS312 | -0.2010 |
| 1009     | H   | 2.6716  | 16.5844 | -12.6606 | H     | 61 | HIS312 | 0.1888  |
| 1010     | HA  | 3.0099  | 13.7914 | -12.9117 | H     | 61 | HIS312 | 0.0867  |
| 1011     | HB3 | 1.2895  | 15.1169 | -10.7213 | H     | 61 | HIS312 | 0.0803  |
| 1012     | HB2 | 3.0528  | 15.2913 | -10.7540 | H     | 61 | HIS312 | 0.0803  |
| 1013     | HD1 | 2.5316  | 14.3171 | -8.3366  | H     | 61 | HIS312 | 0.2700  |
| 1014     | HD2 | 2.5685  | 11.7073 | -11.6247 | H     | 61 | HIS312 | 0.1326  |
| 1015     | HE1 | 3.0077  | 12.0193 | -7.3802  | H     | 61 | HIS312 | 0.1885  |
| 1016     | N   | -0.1156 | 14.9239 | -13.2235 | N.am  | 62 | ALA313 | -0.2636 |
| BACKBONE |     |         |         |          |       |    |        |         |
| 1017     | CA  | -1.4195 | 14.5491 | -13.7732 | C.3   | 62 | ALA313 | 0.1282  |
| BACKBONE |     |         |         |          |       |    |        |         |
| 1018     | C   | -1.3668 | 14.3050 | -15.2614 | C.2   | 62 | ALA313 | 0.2036  |
| BACKBONE |     |         |         |          |       |    |        |         |
| 1019     | O   | -1.9470 | 13.3343 | -15.7212 | O.2   | 62 | ALA313 | -0.3944 |
| BACKBONE |     |         |         |          |       |    |        |         |
| 1020     | CB  | -2.4582 | 15.6777 | -13.5336 | C.3   | 62 | ALA313 | -0.0244 |
| 1021     | H   | 0.0303  | 15.8790 | -12.9554 | H     | 62 | ALA313 | 0.1883  |
| 1022     | HA  | -1.7662 | 13.6204 | -13.2998 | H     | 62 | ALA313 | 0.0797  |
| 1023     | HB3 | -2.1494 | 16.5802 | -14.0754 | H     | 62 | ALA313 | 0.0277  |
| 1024     | HB2 | -2.5353 | 15.9330 | -12.4669 | H     | 62 | ALA313 | 0.0277  |
| 1025     | HB1 | -3.4502 | 15.3780 | -13.9014 | H     | 62 | ALA313 | 0.0277  |
| 1026     | N   | -0.7007 | 15.1902 | -16.0331 | N.am  | 63 | LYS314 | -0.2637 |
| BACKBONE |     |         |         |          |       |    |        |         |
| 1027     | CA  | -0.7452 | 15.0642 | -17.4882 | C.3   | 63 | LYS314 | 0.1310  |
| BACKBONE |     |         |         |          |       |    |        |         |
| 1028     | C   | -0.2705 | 13.6929 | -17.9092 | C.2   | 63 | LYS314 | 0.2040  |
| BACKBONE |     |         |         |          |       |    |        |         |
| 1029     | O   | -0.8880 | 13.1038 | -18.7821 | O.2   | 63 | LYS314 | -0.3944 |
| BACKBONE |     |         |         |          |       |    |        |         |
| 1030     | CB  | 0.1266  | 16.1592 | -18.1645 | C.3   | 63 | LYS314 | -0.0122 |
| 1031     | CG  | -0.0244 | 16.1797 | -19.7102 | C.3   | 63 | LYS314 | -0.0440 |
| 1032     | CD  | 0.8182  | 17.2963 | -20.3934 | C.3   | 63 | LYS314 | -0.0124 |
| 1033     | CE  | 0.3277  | 18.7387 | -20.0798 | C.3   | 63 | LYS314 | -0.0354 |
| 1034     | NZ  | 1.1092  | 19.7494 | -20.8299 | N.4   | 63 | LYS314 | 0.2185  |
| 1035     | H   | -0.2103 | 15.9597 | -15.6223 | H     | 63 | LYS314 | 0.1883  |
| 1036     | HA  | -1.7935 | 15.2089 | -17.8023 | H     | 63 | LYS314 | 0.0800  |
| 1037     | HB3 | 1.1838  | 15.9906 | -17.9103 | H     | 63 | LYS314 | 0.0312  |
| 1038     | HB2 | -0.1872 | 17.1288 | -17.7498 | H     | 63 | LYS314 | 0.0312  |
| 1039     | HG3 | -1.0851 | 16.3139 | -19.9747 | H     | 63 | LYS314 | 0.0269  |
| 1040     | HG2 | 0.3068  | 15.2057 | -20.1078 | H     | 63 | LYS314 | 0.0269  |
| 1041     | HD3 | 0.7645  | 17.1468 | -21.4848 | H     | 63 | LYS314 | 0.0317  |
| 1042     | HD2 | 1.8718  | 17.2006 | -20.0925 | H     | 63 | LYS314 | 0.0317  |
| 1043     | HE3 | 0.4328  | 18.9603 | -19.0059 | H     | 63 | LYS314 | 0.0813  |
| 1044     | HE2 | -0.7393 | 18.8269 | -20.3473 | H     | 63 | LYS314 | 0.0813  |
| 1045     | HZ3 | 2.1580  | 19.7158 | -20.5677 | H     | 63 | LYS314 | 0.1994  |
| 1046     | HZ2 | 0.7638  | 20.7530 | -20.6178 | H     | 63 | LYS314 | 0.1994  |
| 1047     | HZ1 | 1.0330  | 19.6114 | -21.8998 | H     | 63 | LYS314 | 0.1994  |
| 1048     | N   | 0.8277  | 13.1836 | -17.3034 | N.am  | 64 | TRP315 | -0.2627 |
| BACKBONE |     |         |         |          |       |    |        |         |

|          |         |         |          |       |    |        |         |
|----------|---------|---------|----------|-------|----|--------|---------|
| 1049 CA  | 1.4145  | 11.9185 | -17.7515 | C.3   | 64 | TRP315 | 0.1352  |
| BACKBONE |         |         |          |       |    |        |         |
| 1050 C   | 1.0089  | 10.7315 | -16.9071 | C.2   | 64 | TRP315 | 0.2053  |
| BACKBONE |         |         |          |       |    |        |         |
| 1051 O   | 0.8244  | 9.6727  | -17.4875 | O.2   | 64 | TRP315 | -0.3942 |
| BACKBONE |         |         |          |       |    |        |         |
| 1052 CB  | 2.9542  | 12.0843 | -17.7845 | C.3   | 64 | TRP315 | 0.0042  |
| 1053 CG  | 3.2349  | 13.2599 | -18.6859 | C.2   | 64 | TRP315 | -0.0418 |
| 1054 CD1 | 3.6701  | 14.4794 | -18.3291 | C.2   | 64 | TRP315 | 0.0167  |
| 1055 CD2 | 3.0501  | 13.2852 | -20.1826 | C.ar  | 64 | TRP315 | -0.0214 |
| 1056 NE1 | 3.7659  | 15.2376 | -19.3908 | N.pl3 | 64 | TRP315 | -0.2890 |
| 1057 CE2 | 3.4085  | 14.5787 | -20.5088 | C.ar  | 64 | TRP315 | 0.0603  |
| 1058 CE3 | 2.6437  | 12.3660 | -21.1487 | C.ar  | 64 | TRP315 | -0.0747 |
| 1059 CZ2 | 3.3752  | 15.0435 | -21.8228 | C.ar  | 64 | TRP315 | -0.0443 |
| 1060 CZ3 | 2.6014  | 12.8188 | -22.4738 | C.ar  | 64 | TRP315 | -0.0792 |
| 1061 CH2 | 2.9597  | 14.1353 | -22.8051 | C.ar  | 64 | TRP315 | -0.0768 |
| 1062 H   | 1.2810  | 13.6838 | -16.5620 | H     | 64 | TRP315 | 0.1884  |
| 1063 HA  | 1.0968  | 11.7031 | -18.7852 | H     | 64 | TRP315 | 0.0815  |
| 1064 HB3 | 3.4389  | 11.1773 | -18.1768 | H     | 64 | TRP315 | 0.0397  |
| 1065 HB2 | 3.3368  | 12.2674 | -16.7678 | H     | 64 | TRP315 | 0.0397  |
| 1066 HD1 | 3.9017  | 14.7835 | -17.3112 | H     | 64 | TRP315 | 0.0795  |
| 1067 HE1 | 4.0735  | 16.2206 | -19.3780 | H     | 64 | TRP315 | 0.2216  |
| 1068 HE3 | 2.3768  | 11.3486 | -20.8864 | H     | 64 | TRP315 | 0.0540  |
| 1069 HZ2 | 3.6584  | 16.0614 | -22.0679 | H     | 64 | TRP315 | 0.0541  |
| 1070 HZ3 | 2.2853  | 12.1375 | -23.2573 | H     | 64 | TRP315 | 0.0510  |
| 1071 HH2 | 2.9144  | 14.4568 | -23.8409 | H     | 64 | TRP315 | 0.0530  |
| 1072 N   | 0.8656  | 10.8637 | -15.5661 | N.am  | 65 | PHE316 | -0.2618 |
| BACKBONE |         |         |          |       |    |        |         |
| 1073 CA  | 0.4959  | 9.7178  | -14.7322 | C.3   | 65 | PHE316 | 0.1406  |
| BACKBONE |         |         |          |       |    |        |         |
| 1074 C   | -0.7652 | 10.0627 | -13.9624 | C.2   | 65 | PHE316 | 0.2085  |
| BACKBONE |         |         |          |       |    |        |         |
| 1075 O   | -0.6823 | 10.2045 | -12.7521 | O.2   | 65 | PHE316 | -0.3940 |
| BACKBONE |         |         |          |       |    |        |         |
| 1076 CB  | 1.7064  | 9.3555  | -13.8246 | C.3   | 65 | PHE316 | 0.0214  |
| 1077 CG  | 3.0292  | 9.3744  | -14.6129 | C.ar  | 65 | PHE316 | -0.0386 |
| 1078 CD1 | 3.1838  | 8.5773  | -15.7521 | C.ar  | 65 | PHE316 | -0.0601 |
| 1079 CD2 | 4.0980  | 10.1881 | -14.2099 | C.ar  | 65 | PHE316 | -0.0601 |
| 1080 CE1 | 4.3332  | 8.6800  | -16.5424 | C.ar  | 65 | PHE316 | -0.0686 |
| 1081 CE2 | 5.2644  | 10.2634 | -14.9751 | C.ar  | 65 | PHE316 | -0.0686 |
| 1082 CZ  | 5.3629  | 9.5499  | -16.1702 | C.ar  | 65 | PHE316 | -0.0687 |
| 1083 H   | 1.0286  | 11.7369 | -15.1038 | H     | 65 | PHE316 | 0.1885  |
| 1084 HA  | 0.2890  | 8.8076  | -15.3135 | H     | 65 | PHE316 | 0.0823  |
| 1085 HB3 | 1.5696  | 8.3645  | -13.3609 | H     | 65 | PHE316 | 0.0474  |
| 1086 HB2 | 1.7608  | 10.0919 | -13.0166 | H     | 65 | PHE316 | 0.0474  |
| 1087 HD1 | 2.4113  | 7.8702  | -16.0341 | H     | 65 | PHE316 | 0.0557  |
| 1088 HD2 | 4.0376  | 10.7704 | -13.2979 | H     | 65 | PHE316 | 0.0557  |
| 1089 HE1 | 4.4281  | 8.0848  | -17.4443 | H     | 65 | PHE316 | 0.0599  |
| 1090 HE2 | 6.0952  | 10.8765 | -14.6381 | H     | 65 | PHE316 | 0.0599  |
| 1091 HZ  | 6.2336  | 9.6678  | -16.8062 | H     | 65 | PHE316 | 0.0559  |
| 1092 N   | -1.9613 | 10.2106 | -14.5917 | N.am  | 66 | PRO317 | -0.2497 |
| BACKBONE |         |         |          |       |    |        |         |

|           |         |         |          |      |    |        |         |
|-----------|---------|---------|----------|------|----|--------|---------|
| 1093 CA   | -3.1466 | 10.5595 | -13.8179 | C.3  | 66 | PRO317 | 0.1338  |
| BACKBONE  |         |         |          |      |    |        |         |
| 1094 C    | -3.5370 | 9.4507  | -12.8655 | C.2  | 66 | PRO317 | 0.2039  |
| BACKBONE  |         |         |          |      |    |        |         |
| 1095 O    | -4.1435 | 9.7465  | -11.8483 | O.2  | 66 | PRO317 | -0.3944 |
| BACKBONE  |         |         |          |      |    |        |         |
| 1096 CB   | -4.1760 | 10.7841 | -14.9538 | C.3  | 66 | PRO317 | -0.0104 |
| 1097 CG   | -3.6656 | 9.9049  | -16.1164 | C.3  | 66 | PRO317 | -0.0281 |
| 1098 CD   | -2.1262 | 10.0346 | -16.0307 | C.3  | 66 | PRO317 | 0.0369  |
| 1099 HA   | -2.9925 | 11.4911 | -13.2508 | H    | 66 | PRO317 | 0.0802  |
| 1100 HB3  | -4.1415 | 11.8360 | -15.2825 | H    | 66 | PRO317 | 0.0313  |
| 1101 HB2  | -5.2077 | 10.5378 | -14.6568 | H    | 66 | PRO317 | 0.0313  |
| 1102 HG2  | -3.9645 | 8.8610  | -15.9235 | H    | 66 | PRO317 | 0.0287  |
| 1103 HG3  | -4.0662 | 10.2100 | -17.0975 | H    | 66 | PRO317 | 0.0287  |
| 1104 HD2  | -1.6612 | 9.1323  | -16.4543 | H    | 66 | PRO317 | 0.0524  |
| 1105 HD3  | -1.7731 | 10.9282 | -16.5673 | H    | 66 | PRO317 | 0.0524  |
| 1106 N    | -3.1963 | 8.1695  | -13.1361 | N.am | 67 | GLY318 | -0.2664 |
| BACKBONE  |         |         |          |      |    |        |         |
| 1107 CA   | -3.5282 | 7.1176  | -12.1770 | C.3  | 67 | GLY318 | 0.1201  |
| BACKBONE  |         |         |          |      |    |        |         |
| 1108 C    | -2.6997 | 7.1752  | -10.9115 | C.2  | 67 | GLY318 | 0.2008  |
| BACKBONE  |         |         |          |      |    |        |         |
| 1109 O    | -2.9986 | 6.4018  | -10.0145 | O.2  | 67 | GLY318 | -0.3947 |
| BACKBONE  |         |         |          |      |    |        |         |
| 1110 H    | -2.6870 | 7.9157  | -13.9608 | H    | 67 | GLY318 | 0.1881  |
| 1111 HA2  | -3.3641 | 6.1275  | -12.6331 | H    | 67 | GLY318 | 0.0763  |
| 1112 HA3  | -4.5959 | 7.1826  | -11.9140 | H    | 67 | GLY318 | 0.0763  |
| 1113 N    | -1.6606 | 8.0396  | -10.7976 | N.am | 68 | CYS319 | -0.2631 |
| BACKBONE  |         |         |          |      |    |        |         |
| 1114 CA   | -0.8053 | 8.0051  | -9.6104  | C.3  | 68 | CYS319 | 0.1406  |
| BACKBONE  |         |         |          |      |    |        |         |
| 1115 C    | -1.6307 | 8.1432  | -8.3496  | C.2  | 68 | CYS319 | 0.2047  |
| BACKBONE  |         |         |          |      |    |        |         |
| 1116 O    | -2.5241 | 8.9738  | -8.3356  | O.2  | 68 | CYS319 | -0.3944 |
| BACKBONE  |         |         |          |      |    |        |         |
| 1117 CB   | 0.3194  | 9.0755  | -9.6884  | C.3  | 68 | CYS319 | 0.0443  |
| 1118 SG   | 1.4047  | 9.0269  | -8.2205  | S.3  | 68 | CYS319 | -0.0882 |
| 1119 H    | -1.4147 | 8.6707  | -11.5328 | H    | 68 | CYS319 | 0.1884  |
| 1120 HA   | -0.3321 | 7.0117  | -9.6161  | H    | 68 | CYS319 | 0.0808  |
| 1121 HB3  | -0.1069 | 10.0830 | -9.7727  | H    | 68 | CYS319 | 0.0432  |
| 1122 HB2  | 0.9181  | 8.8946  | -10.5924 | H    | 68 | CYS319 | 0.0432  |
| 1123 LPG2 | 1.2183  | 9.4797  | -7.7501  | LP   | 68 | CYS319 | 0.0000  |
| 1124 LPG1 | 1.4296  | 8.4082  | -7.9419  | LP   | 68 | CYS319 | 0.0000  |
| 1125 N    | -1.3710 | 7.3306  | -7.2948  | N.am | 69 | GLU320 | -0.2636 |
| BACKBONE  |         |         |          |      |    |        |         |
| 1126 CA   | -2.2272 | 7.3644  | -6.1084  | C.3  | 69 | GLU320 | 0.1325  |
| BACKBONE  |         |         |          |      |    |        |         |
| 1127 C    | -1.8665 | 8.5669  | -5.2692  | C.2  | 69 | GLU320 | 0.2041  |
| BACKBONE  |         |         |          |      |    |        |         |
| 1128 O    | -2.7662 | 9.3121  | -4.9140  | O.2  | 69 | GLU320 | -0.3944 |
| BACKBONE  |         |         |          |      |    |        |         |
| 1129 CB   | -2.1244 | 6.0721  | -5.2502  | C.3  | 69 | GLU320 | -0.0008 |

|          |      |         |         |          |       |    |        |         |
|----------|------|---------|---------|----------|-------|----|--------|---------|
| 1130     | CG   | -2.5787 | 4.8070  | -6.0287  | C.3   | 69 | GLU320 | 0.0044  |
| 1131     | CD   | -4.0187 | 4.9078  | -6.4670  | C.2   | 69 | GLU320 | 0.0350  |
| 1132     | OE1  | -4.8895 | 5.1604  | -5.5900  | O.co2 | 69 | GLU320 | -0.5690 |
| 1133     | OE2  | -4.2945 | 4.7394  | -7.6870  | O.co2 | 69 | GLU320 | -0.5690 |
| 1134     | H    | -0.5919 | 6.7005  | -7.3014  | H     | 69 | GLU320 | 0.1883  |
| 1135     | HA   | -3.2789 | 7.4598  | -6.4265  | H     | 69 | GLU320 | 0.0801  |
| 1136     | HB3  | -2.7505 | 6.1860  | -4.3496  | H     | 69 | GLU320 | 0.0330  |
| 1137     | HB2  | -1.0853 | 5.9304  | -4.9187  | H     | 69 | GLU320 | 0.0330  |
| 1138     | HG3  | -2.4817 | 3.9238  | -5.3766  | H     | 69 | GLU320 | 0.0433  |
| 1139     | HG2  | -1.9294 | 4.6501  | -6.9047  | H     | 69 | GLU320 | 0.0433  |
| 1140     | N    | -0.5650 | 8.7731  | -4.9533  | N.am  | 70 | PHE321 | -0.2619 |
| BACKBONE |      |         |         |          |       |    |        |         |
| 1141     | CA   | -0.1649 | 9.9600  | -4.1959  | C.3   | 70 | PHE321 | 0.1404  |
| BACKBONE |      |         |         |          |       |    |        |         |
| 1142     | C    | -0.8526 | 11.1658 | -4.7833  | C.2   | 70 | PHE321 | 0.2060  |
| BACKBONE |      |         |         |          |       |    |        |         |
| 1143     | O    | -1.4991 | 11.9060 | -4.0616  | O.2   | 70 | PHE321 | -0.3942 |
| BACKBONE |      |         |         |          |       |    |        |         |
| 1144     | CB   | 1.3727  | 10.1614 | -4.2163  | C.3   | 70 | PHE321 | 0.0214  |
| 1145     | CG   | 1.7781  | 11.4966 | -3.5747  | C.ar  | 70 | PHE321 | -0.0386 |
| 1146     | CD1  | 1.8497  | 11.6274 | -2.1841  | C.ar  | 70 | PHE321 | -0.0601 |
| 1147     | CD2  | 2.0992  | 12.6003 | -4.3714  | C.ar  | 70 | PHE321 | -0.0601 |
| 1148     | CE1  | 2.4519  | 12.7525 | -1.6126  | C.ar  | 70 | PHE321 | -0.0686 |
| 1149     | CE2  | 2.7323  | 13.7129 | -3.8113  | C.ar  | 70 | PHE321 | -0.0686 |
| 1150     | CZ   | 2.9400  | 13.7756 | -2.4308  | C.ar  | 70 | PHE321 | -0.0687 |
| 1151     | H    | 0.1435  | 8.1273  | -5.2424  | H     | 70 | PHE321 | 0.1885  |
| 1152     | HA   | -0.4716 | 9.8478  | -3.1482  | H     | 70 | PHE321 | 0.0823  |
| 1153     | HB3  | 1.7458  | 10.1246 | -5.2516  | H     | 70 | PHE321 | 0.0474  |
| 1154     | HB2  | 1.8569  | 9.3397  | -3.6647  | H     | 70 | PHE321 | 0.0474  |
| 1155     | HD1  | 1.4408  | 10.8537 | -1.5458  | H     | 70 | PHE321 | 0.0557  |
| 1156     | HD2  | 1.8583  | 12.5985 | -5.4268  | H     | 70 | PHE321 | 0.0557  |
| 1157     | HE1  | 2.5423  | 12.8305 | -0.5339  | H     | 70 | PHE321 | 0.0599  |
| 1158     | HE2  | 3.0583  | 14.5263 | -4.4486  | H     | 70 | PHE321 | 0.0599  |
| 1159     | HZ   | 3.4692  | 14.6187 | -1.9974  | H     | 70 | PHE321 | 0.0559  |
| 1160     | N    | -0.7351 | 11.3600 | -6.1111  | N.am  | 71 | LEU322 | -0.2636 |
| BACKBONE |      |         |         |          |       |    |        |         |
| 1161     | CA   | -1.3778 | 12.5078 | -6.7377  | C.3   | 71 | LEU322 | 0.1312  |
| BACKBONE |      |         |         |          |       |    |        |         |
| 1162     | C    | -2.8561 | 12.5447 | -6.4254  | C.2   | 71 | LEU322 | 0.2039  |
| BACKBONE |      |         |         |          |       |    |        |         |
| 1163     | O    | -3.3430 | 13.5922 | -6.0304  | O.2   | 71 | LEU322 | -0.3944 |
| BACKBONE |      |         |         |          |       |    |        |         |
| 1164     | CB   | -1.2184 | 12.4156 | -8.2757  | C.3   | 71 | LEU322 | -0.0101 |
| 1165     | CG   | -1.9763 | 13.5205 | -9.0589  | C.3   | 71 | LEU322 | -0.0425 |
| 1166     | CD1  | -1.4276 | 14.9381 | -8.7545  | C.3   | 71 | LEU322 | -0.0625 |
| 1167     | CD2  | -1.8545 | 13.2099 | -10.5703 | C.3   | 71 | LEU322 | -0.0625 |
| 1168     | H    | -0.2026 | 10.7290 | -6.6749  | H     | 71 | LEU322 | 0.1883  |
| 1169     | HA   | -0.8769 | 13.4139 | -6.3626  | H     | 71 | LEU322 | 0.0800  |
| 1170     | HB3  | -1.6313 | 11.4463 | -8.5903  | H     | 71 | LEU322 | 0.0315  |
| 1171     | HB2  | -0.1472 | 12.4364 | -8.5352  | H     | 71 | LEU322 | 0.0315  |
| 1172     | HG   | -3.0466 | 13.5102 | -8.7965  | H     | 71 | LEU322 | 0.0298  |
| 1173     | HD13 | -1.6198 | 15.2230 | -7.7098  | H     | 71 | LEU322 | 0.0232  |

|          |      |         |         |          |       |    |        |         |
|----------|------|---------|---------|----------|-------|----|--------|---------|
| 1174     | HD12 | -1.9014 | 15.6926 | -9.4019  | H     | 71 | LEU322 | 0.0232  |
| 1175     | HD11 | -0.3452 | 14.9440 | -8.9379  | H     | 71 | LEU322 | 0.0232  |
| 1176     | HD23 | -0.8026 | 13.2343 | -10.8934 | H     | 71 | LEU322 | 0.0232  |
| 1177     | HD22 | -2.4167 | 13.9741 | -11.1133 | H     | 71 | LEU322 | 0.0232  |
| 1178     | HD21 | -2.2802 | 12.2244 | -10.8165 | H     | 71 | LEU322 | 0.0232  |
| 1179     | N    | -3.5914 | 11.4247 | -6.6185  | N.am  | 72 | ILE323 | -0.2635 |
| BACKBONE |      |         |         |          |       |    |        |         |
| 1180     | CA   | -5.0427 | 11.4727 | -6.4445  | C.3   | 72 | ILE323 | 0.1335  |
| BACKBONE |      |         |         |          |       |    |        |         |
| 1181     | C    | -5.3242 | 11.9095 | -5.0255  | C.2   | 72 | ILE323 | 0.2042  |
| BACKBONE |      |         |         |          |       |    |        |         |
| 1182     | O    | -5.9623 | 12.9341 | -4.8444  | O.2   | 72 | ILE323 | -0.3944 |
| BACKBONE |      |         |         |          |       |    |        |         |
| 1183     | CB   | -5.7488 | 10.1298 | -6.8144  | C.3   | 72 | ILE323 | -0.0037 |
| 1184     | CG1  | -5.6893 | 9.8970  | -8.3579  | C.3   | 72 | ILE323 | -0.0491 |
| 1185     | CG2  | -7.2230 | 10.1302 | -6.3129  | C.3   | 72 | ILE323 | -0.0582 |
| 1186     | CD1  | -5.9143 | 8.4193  | -8.7782  | C.3   | 72 | ILE323 | -0.0648 |
| 1187     | H    | -3.1590 | 10.5633 | -6.8918  | H     | 72 | ILE323 | 0.1883  |
| 1188     | HA   | -5.4438 | 12.2413 | -7.1272  | H     | 72 | ILE323 | 0.0803  |
| 1189     | HB   | -5.2162 | 9.3098  | -6.3052  | H     | 72 | ILE323 | 0.0345  |
| 1190     | HG13 | -4.7072 | 10.2017 | -8.7515  | H     | 72 | ILE323 | 0.0267  |
| 1191     | HG12 | -6.4477 | 10.5273 | -8.8480  | H     | 72 | ILE323 | 0.0267  |
| 1192     | HG23 | -7.2681 | 10.2086 | -5.2158  | H     | 72 | ILE323 | 0.0235  |
| 1193     | HG22 | -7.7409 | 9.2023  | -6.5935  | H     | 72 | ILE323 | 0.0235  |
| 1194     | HG21 | -7.7725 | 10.9812 | -6.7453  | H     | 72 | ILE323 | 0.0235  |
| 1195     | HD13 | -5.1616 | 7.7659  | -8.3102  | H     | 72 | ILE323 | 0.0230  |
| 1196     | HD12 | -5.8186 | 8.3274  | -9.8715  | H     | 72 | ILE323 | 0.0230  |
| 1197     | HD11 | -6.9154 | 8.0638  | -8.4957  | H     | 72 | ILE323 | 0.0230  |
| 1198     | N    | -4.8614 | 11.1614 | -3.9988  | N.am  | 73 | ARG324 | -0.2637 |
| BACKBONE |      |         |         |          |       |    |        |         |
| 1199     | CA   | -5.1606 | 11.5705 | -2.6268  | C.3   | 73 | ARG324 | 0.1311  |
| BACKBONE |      |         |         |          |       |    |        |         |
| 1200     | C    | -4.6928 | 12.9859 | -2.3522  | C.2   | 73 | ARG324 | 0.2039  |
| BACKBONE |      |         |         |          |       |    |        |         |
| 1201     | O    | -5.3492 | 13.6647 | -1.5772  | O.2   | 73 | ARG324 | -0.3944 |
| BACKBONE |      |         |         |          |       |    |        |         |
| 1202     | CB   | -4.6457 | 10.5873 | -1.5359  | C.3   | 73 | ARG324 | -0.0092 |
| 1203     | CG   | -3.1014 | 10.4226 | -1.4837  | C.3   | 73 | ARG324 | -0.0156 |
| 1204     | CD   | -2.6859 | 9.4954  | -0.3066  | C.3   | 73 | ARG324 | 0.0627  |
| 1205     | NE   | -1.2359 | 9.2707  | -0.2581  | N.pl3 | 73 | ARG324 | -0.2723 |
| 1206     | CZ   | -0.5933 | 8.3789  | -0.9871  | C.cat | 73 | ARG324 | 0.2882  |
| 1207     | NH1  | -1.1756 | 7.6233  | -1.8916  | N.pl3 | 73 | ARG324 | -0.2849 |
| 1208     | NH2  | 0.7016  | 8.2359  | -0.8078  | N.pl3 | 73 | ARG324 | -0.2849 |
| 1209     | H    | -4.3423 | 10.3226 | -4.1654  | H     | 73 | ARG324 | 0.1883  |
| 1210     | HA   | -6.2619 | 11.5719 | -2.5419  | H     | 73 | ARG324 | 0.0800  |
| 1211     | HB3  | -5.1000 | 9.5985  | -1.7155  | H     | 73 | ARG324 | 0.0313  |
| 1212     | HB2  | -4.9959 | 10.9495 | -0.5546  | H     | 73 | ARG324 | 0.0313  |
| 1213     | HG3  | -2.6142 | 11.4010 | -1.3571  | H     | 73 | ARG324 | 0.0301  |
| 1214     | HG2  | -2.7516 | 9.9924  | -2.4286  | H     | 73 | ARG324 | 0.0301  |
| 1215     | HD3  | -3.2413 | 8.5446  | -0.3121  | H     | 73 | ARG324 | 0.0689  |
| 1216     | HD2  | -2.9839 | 10.0039 | 0.6269   | H     | 73 | ARG324 | 0.0689  |
| 1217     | HE   | -0.7022 | 9.8345  | 0.4249   | H     | 73 | ARG324 | 0.2642  |

|          |      |         |         |         |      |    |        |         |
|----------|------|---------|---------|---------|------|----|--------|---------|
| 1218     | HH11 | -2.1795 | 7.6912  | -2.0924 | H    | 73 | ARG324 | 0.2615  |
| 1219     | HH12 | -0.6308 | 6.9400  | -2.4390 | H    | 73 | ARG324 | 0.2615  |
| 1220     | HH21 | 1.2082  | 8.7920  | -0.1029 | H    | 73 | ARG324 | 0.2615  |
| 1221     | HH22 | 1.2469  | 7.5586  | -1.3627 | H    | 73 | ARG324 | 0.2615  |
| 1222     | N    | -3.5838 | 13.4640 | -2.9663 | N.am | 74 | MET325 | -0.2637 |
| BACKBONE |      |         |         |         |      |    |        |         |
| 1223     | CA   | -3.1485 | 14.8394 | -2.7211 | C.3  | 74 | MET325 | 0.1317  |
| BACKBONE |      |         |         |         |      |    |        |         |
| 1224     | C    | -4.0627 | 15.8208 | -3.4296 | C.2  | 74 | MET325 | 0.2039  |
| BACKBONE |      |         |         |         |      |    |        |         |
| 1225     | O    | -4.8266 | 16.4904 | -2.7509 | O.2  | 74 | MET325 | -0.3944 |
| BACKBONE |      |         |         |         |      |    |        |         |
| 1226     | CB   | -1.6608 | 15.0805 | -3.1075 | C.3  | 74 | MET325 | -0.0034 |
| 1227     | CG   | -0.6642 | 14.3246 | -2.1884 | C.3  | 74 | MET325 | -0.0024 |
| 1228     | SD   | -0.6394 | 15.0177 | -0.5017 | S.o  | 74 | MET325 | -0.1639 |
| 1229     | CE   | -1.3538 | 13.6479 | 0.4641  | C.3  | 74 | MET325 | -0.0181 |
| 1230     | H    | -3.0632 | 12.9016 | -3.6101 | H    | 74 | MET325 | 0.1883  |
| 1231     | HA   | -3.2209 | 15.0491 | -1.6415 | H    | 74 | MET325 | 0.0800  |
| 1232     | HB3  | -1.4348 | 16.1587 | -3.0563 | H    | 74 | MET325 | 0.0320  |
| 1233     | HB2  | -1.4889 | 14.7487 | -4.1429 | H    | 74 | MET325 | 0.0320  |
| 1234     | HG3  | 0.3474  | 14.4516 | -2.5950 | H    | 74 | MET325 | 0.0378  |
| 1235     | HG2  | -0.8818 | 13.2499 | -2.1436 | H    | 74 | MET325 | 0.0378  |
| 1236     | LPD2 | -0.0065 | 15.1591 | -0.3010 | LP   | 74 | MET325 | 0.0000  |
| 1237     | LPD1 | -1.0212 | 15.5775 | -0.4580 | LP   | 74 | MET325 | 0.0000  |
| 1238     | HE3  | -2.3825 | 13.4458 | 0.1324  | H    | 74 | MET325 | 0.0340  |
| 1239     | HE2  | -1.3682 | 13.9309 | 1.5265  | H    | 74 | MET325 | 0.0340  |
| 1240     | HE1  | -0.7418 | 12.7415 | 0.3409  | H    | 74 | MET325 | 0.0340  |
| 1241     | N    | -4.0064 | 15.9493 | -4.7771 | N.am | 75 | LYS326 | -0.2637 |
| BACKBONE |      |         |         |         |      |    |        |         |
| 1242     | CA   | -4.8015 | 16.9773 | -5.4517 | C.3  | 75 | LYS326 | 0.1310  |
| BACKBONE |      |         |         |         |      |    |        |         |
| 1243     | C    | -6.2590 | 16.5783 | -5.5282 | C.2  | 75 | LYS326 | 0.2037  |
| BACKBONE |      |         |         |         |      |    |        |         |
| 1244     | O    | -7.0978 | 17.3913 | -5.1696 | O.2  | 75 | LYS326 | -0.3944 |
| BACKBONE |      |         |         |         |      |    |        |         |
| 1245     | CB   | -4.2797 | 17.2915 | -6.8843 | C.3  | 75 | LYS326 | -0.0122 |
| 1246     | CG   | -2.9303 | 18.0682 | -6.9157 | C.3  | 75 | LYS326 | -0.0440 |
| 1247     | CD   | -3.0722 | 19.5442 | -6.4356 | C.3  | 75 | LYS326 | -0.0124 |
| 1248     | CE   | -1.7778 | 20.3663 | -6.6703 | C.3  | 75 | LYS326 | -0.0354 |
| 1249     | NZ   | -1.8923 | 21.7465 | -6.1462 | N.4  | 75 | LYS326 | 0.2185  |
| 1250     | H    | -3.4276 | 15.3531 | -5.3333 | H    | 75 | LYS326 | 0.1883  |
| 1251     | HA   | -4.7578 | 17.9031 | -4.8589 | H    | 75 | LYS326 | 0.0800  |
| 1252     | HB3  | -5.0274 | 17.9071 | -7.4045 | H    | 75 | LYS326 | 0.0312  |
| 1253     | HB2  | -4.1812 | 16.3474 | -7.4456 | H    | 75 | LYS326 | 0.0312  |
| 1254     | HG3  | -2.5711 | 18.0825 | -7.9586 | H    | 75 | LYS326 | 0.0269  |
| 1255     | HG2  | -2.1798 | 17.5402 | -6.3051 | H    | 75 | LYS326 | 0.0269  |
| 1256     | HD3  | -3.2906 | 19.5809 | -5.3581 | H    | 75 | LYS326 | 0.0317  |
| 1257     | HD2  | -3.8978 | 20.0364 | -6.9758 | H    | 75 | LYS326 | 0.0317  |
| 1258     | HE3  | -1.5747 | 20.4150 | -7.7517 | H    | 75 | LYS326 | 0.0813  |
| 1259     | HE2  | -0.9378 | 19.8567 | -6.1717 | H    | 75 | LYS326 | 0.0813  |
| 1260     | HZ3  | -2.7004 | 22.2876 | -6.6192 | H    | 75 | LYS326 | 0.1994  |
| 1261     | HZ2  | -0.9838 | 22.3069 | -6.3243 | H    | 75 | LYS326 | 0.1994  |



|          |      |          |         |          |       |    |        |         |
|----------|------|----------|---------|----------|-------|----|--------|---------|
| 1262     | HZ1  | -2.0664  | 21.7606 | -5.0790  | H     | 75 | LYS326 | 0.1994  |
| 1263     | N    | -6.5774  | 15.3501 | -5.9998  | N.am  | 76 | GLY327 | -0.2664 |
| BACKBONE |      |          |         |          |       |    |        |         |
| 1264     | CA   | -7.9741  | 14.9403 | -6.1546  | C.3   | 76 | GLY327 | 0.1201  |
| BACKBONE |      |          |         |          |       |    |        |         |
| 1265     | C    | -8.2447  | 14.6154 | -7.6011  | C.2   | 76 | GLY327 | 0.2007  |
| BACKBONE |      |          |         |          |       |    |        |         |
| 1266     | O    | -7.4253  | 14.9451 | -8.4432  | O.2   | 76 | GLY327 | -0.3947 |
| BACKBONE |      |          |         |          |       |    |        |         |
| 1267     | H    | -5.8659  | 14.6968 | -6.2704  | H     | 76 | GLY327 | 0.1881  |
| 1268     | HA2  | -8.6938  | 15.7151 | -5.8475  | H     | 76 | GLY327 | 0.0763  |
| 1269     | HA3  | -8.1592  | 14.0461 | -5.5395  | H     | 76 | GLY327 | 0.0763  |
| 1270     | N    | -9.3933  | 13.9679 | -7.9023  | N.am  | 77 | GLN328 | -0.2638 |
| BACKBONE |      |          |         |          |       |    |        |         |
| 1271     | CA   | -9.6771  | 13.5741 | -9.2819  | C.3   | 77 | GLN328 | 0.1330  |
| BACKBONE |      |          |         |          |       |    |        |         |
| 1272     | C    | -10.1806 | 14.7500 | -10.0891 | C.2   | 77 | GLN328 | 0.2040  |
| BACKBONE |      |          |         |          |       |    |        |         |
| 1273     | O    | -9.8149  | 14.8584 | -11.2484 | O.2   | 77 | GLN328 | -0.3944 |
| BACKBONE |      |          |         |          |       |    |        |         |
| 1274     | CB   | -10.7094 | 12.4143 | -9.3142  | C.3   | 77 | GLN328 | 0.0045  |
| 1275     | CG   | -10.9068 | 11.8305 | -10.7401 | C.3   | 77 | GLN328 | 0.0412  |
| 1276     | CD   | -9.6120  | 11.3575 | -11.3625 | C.2   | 77 | GLN328 | 0.1737  |
| 1277     | OE1  | -9.2087  | 11.9054 | -12.3768 | O.2   | 77 | GLN328 | -0.3973 |
| 1278     | NE2  | -8.9331  | 10.3419 | -10.7831 | N.am  | 77 | GLN328 | -0.3009 |
| 1279     | H    | -10.0620 | 13.7507 | -7.1876  | H     | 77 | GLN328 | 0.1883  |
| 1280     | HA   | -8.7408  | 13.2029 | -9.7294  | H     | 77 | GLN328 | 0.0801  |
| 1281     | HB3  | -11.6770 | 12.7790 | -8.9319  | H     | 77 | GLN328 | 0.0337  |
| 1282     | HB2  | -10.3592 | 11.6188 | -8.6371  | H     | 77 | GLN328 | 0.0337  |
| 1283     | HG3  | -11.3679 | 12.5990 | -11.3797 | H     | 77 | GLN328 | 0.0504  |
| 1284     | HG2  | -11.6026 | 10.9777 | -10.6930 | H     | 77 | GLN328 | 0.0504  |
| 1285     | HE21 | -9.2743  | 9.8863  | -9.9603  | H     | 77 | GLN328 | 0.1814  |
| 1286     | HE22 | -8.0711  | 10.0283 | -11.1851 | H     | 77 | GLN328 | 0.1814  |
| 1287     | N    | -11.0203 | 15.6462 | -9.5205  | N.am  | 78 | GLU329 | -0.2636 |
| BACKBONE |      |          |         |          |       |    |        |         |
| 1288     | CA   | -11.5073 | 16.7808 | -10.3080 | C.3   | 78 | GLU329 | 0.1325  |
| BACKBONE |      |          |         |          |       |    |        |         |
| 1289     | C    | -10.3236 | 17.5677 | -10.8283 | C.2   | 78 | GLU329 | 0.2041  |
| BACKBONE |      |          |         |          |       |    |        |         |
| 1290     | O    | -10.2895 | 17.8805 | -12.0078 | O.2   | 78 | GLU329 | -0.3944 |
| BACKBONE |      |          |         |          |       |    |        |         |
| 1291     | CB   | -12.4467 | 17.6999 | -9.4766  | C.3   | 78 | GLU329 | -0.0008 |
| 1292     | CG   | -13.0331 | 18.8652 | -10.3204 | C.3   | 78 | GLU329 | 0.0044  |
| 1293     | CD   | -13.8222 | 18.3619 | -11.5047 | C.2   | 78 | GLU329 | 0.0350  |
| 1294     | OE1  | -14.6897 | 17.4676 | -11.3030 | O.co2 | 78 | GLU329 | -0.5690 |
| 1295     | OE2  | -13.5836 | 18.8498 | -12.6449 | O.co2 | 78 | GLU329 | -0.5690 |
| 1296     | H    | -11.3234 | 15.5452 | -8.5710  | H     | 78 | GLU329 | 0.1883  |
| 1297     | HA   | -12.0761 | 16.3700 | -11.1589 | H     | 78 | GLU329 | 0.0801  |
| 1298     | HB3  | -11.8890 | 18.1166 | -8.6221  | H     | 78 | GLU329 | 0.0330  |
| 1299     | HB2  | -13.2751 | 17.0934 | -9.0748  | H     | 78 | GLU329 | 0.0330  |
| 1300     | HG3  | -12.2172 | 19.5215 | -10.6615 | H     | 78 | GLU329 | 0.0433  |
| 1301     | HG2  | -13.7073 | 19.4678 | -9.6904  | H     | 78 | GLU329 | 0.0433  |

|           |         |         |          |      |    |        |         |
|-----------|---------|---------|----------|------|----|--------|---------|
| 1302 N    | -9.3384 | 17.8833 | -9.9556  | N.am | 79 | TYR330 | -0.2621 |
| BACKBONE  |         |         |          |      |    |        |         |
| 1303 CA   | -8.1347 | 18.5825 | -10.4112 | C.3  | 79 | TYR330 | 0.1390  |
| BACKBONE  |         |         |          |      |    |        |         |
| 1304 C    | -7.5726 | 17.9147 | -11.6456 | C.2  | 79 | TYR330 | 0.2057  |
| BACKBONE  |         |         |          |      |    |        |         |
| 1305 O    | -7.2592 | 18.5969 | -12.6081 | O.2  | 79 | TYR330 | -0.3942 |
| BACKBONE  |         |         |          |      |    |        |         |
| 1306 CB   | -7.0432 | 18.5434 | -9.3079  | C.3  | 79 | TYR330 | 0.0163  |
| 1307 CG   | -5.7311 | 19.1817 | -9.7866  | C.ar | 79 | TYR330 | -0.0493 |
| 1308 CD1  | -4.7156 | 18.3992 | -10.3493 | C.ar | 79 | TYR330 | -0.0685 |
| 1309 CD2  | -5.5353 | 20.5597 | -9.6503  | C.ar | 79 | TYR330 | -0.0685 |
| 1310 CE1  | -3.4992 | 18.9782 | -10.7237 | C.ar | 79 | TYR330 | -0.0398 |
| 1311 CE2  | -4.3172 | 21.1378 | -10.0162 | C.ar | 79 | TYR330 | -0.0398 |
| 1312 CZ   | -3.2895 | 20.3514 | -10.5423 | C.ar | 79 | TYR330 | 0.0805  |
| 1313 OH   | -2.0751 | 20.9561 | -10.8788 | O.3  | 79 | TYR330 | -0.3376 |
| 1314 H    | -9.4153 | 17.6329 | -8.9877  | H    | 79 | TYR330 | 0.1885  |
| 1315 HA   | -8.3899 | 19.6321 | -10.6315 | H    | 79 | TYR330 | 0.0821  |
| 1316 HB2  | -6.8569 | 17.4993 | -9.0154  | H    | 79 | TYR330 | 0.0453  |
| 1317 HB3  | -7.4033 | 19.0745 | -8.4122  | H    | 79 | TYR330 | 0.0453  |
| 1318 HD1  | -4.8647 | 17.3344 | -10.4960 | H    | 79 | TYR330 | 0.0530  |
| 1319 HD2  | -6.3281 | 21.1868 | -9.2563  | H    | 79 | TYR330 | 0.0530  |
| 1320 HE1  | -2.7221 | 18.3540 | -11.1541 | H    | 79 | TYR330 | 0.0525  |
| 1321 HE2  | -4.1647 | 22.2048 | -9.8914  | H    | 79 | TYR330 | 0.0525  |
| 1322 HH   | -1.4021 | 20.3438 | -11.1467 | H    | 79 | TYR330 | 0.2458  |
| 1323 N    | -7.4402 | 16.5700 | -11.6174 | N.am | 80 | ILE331 | -0.2633 |
| BACKBONE  |         |         |          |      |    |        |         |
| 1324 CA   | -6.8504 | 15.8571 | -12.7505 | C.3  | 80 | ILE331 | 0.1335  |
| BACKBONE  |         |         |          |      |    |        |         |
| 1325 C    | -7.7260 | 16.0827 | -13.9598 | C.2  | 80 | ILE331 | 0.2043  |
| BACKBONE  |         |         |          |      |    |        |         |
| 1326 O    | -7.2090 | 16.4326 | -15.0093 | O.2  | 80 | ILE331 | -0.3944 |
| BACKBONE  |         |         |          |      |    |        |         |
| 1327 CB   | -6.6945 | 14.3356 | -12.4419 | C.3  | 80 | ILE331 | -0.0037 |
| 1328 CG1  | -5.6332 | 14.1275 | -11.3196 | C.3  | 80 | ILE331 | -0.0491 |
| 1329 CG2  | -6.3488 | 13.5152 | -13.7162 | C.3  | 80 | ILE331 | -0.0582 |
| 1330 CD1  | -5.5451 | 12.6585 | -10.8332 | C.3  | 80 | ILE331 | -0.0648 |
| 1331 H    | -7.7687 | 16.0501 | -10.8274 | H    | 80 | ILE331 | 0.1883  |
| 1332 HA   | -5.8505 | 16.2752 | -12.9548 | H    | 80 | ILE331 | 0.0803  |
| 1333 HB   | -7.6621 | 13.9590 | -12.0808 | H    | 80 | ILE331 | 0.0345  |
| 1334 HG13 | -5.8727 | 14.7477 | -10.4440 | H    | 80 | ILE331 | 0.0267  |
| 1335 HG12 | -4.6528 | 14.4560 | -11.6910 | H    | 80 | ILE331 | 0.0267  |
| 1336 HG23 | -7.1033 | 13.6603 | -14.5037 | H    | 80 | ILE331 | 0.0235  |
| 1337 HG22 | -6.3323 | 12.4397 | -13.4936 | H    | 80 | ILE331 | 0.0235  |
| 1338 HG21 | -5.3650 | 13.8126 | -14.1057 | H    | 80 | ILE331 | 0.0235  |
| 1339 HD13 | -6.5504 | 12.2546 | -10.6456 | H    | 80 | ILE331 | 0.0230  |
| 1340 HD12 | -4.9677 | 12.5934 | -9.9001  | H    | 80 | ILE331 | 0.0230  |
| 1341 HD11 | -5.0427 | 12.0360 | -11.5837 | H    | 80 | ILE331 | 0.0230  |
| 1342 N    | -9.0567 | 15.8854 | -13.8279 | N.am | 81 | ASN332 | -0.2616 |
| BACKBONE  |         |         |          |      |    |        |         |
| 1343 CA   | -9.9413 | 16.0621 | -14.9774 | C.3  | 81 | ASN332 | 0.1476  |
| BACKBONE  |         |         |          |      |    |        |         |

|          |      |          |         |          |      |    |        |         |
|----------|------|----------|---------|----------|------|----|--------|---------|
| 1344     | C    | -9.6941  | 17.4086 | -15.6189 | C.2  | 81 | ASN332 | 0.2064  |
| BACKBONE |      |          |         |          |      |    |        |         |
| 1345     | O    | -9.6391  | 17.4837 | -16.8362 | O.2  | 81 | ASN332 | -0.3942 |
| BACKBONE |      |          |         |          |      |    |        |         |
| 1346     | CB   | -11.4376 | 15.9775 | -14.5668 | C.3  | 81 | ASN332 | 0.0773  |
| 1347     | CG   | -11.7799 | 14.6826 | -13.8672 | C.2  | 81 | ASN332 | 0.1780  |
| 1348     | OD1  | -10.9434 | 13.7956 | -13.7960 | O.2  | 81 | ASN332 | -0.3970 |
| 1349     | ND2  | -13.0163 | 14.5525 | -13.3380 | N.am | 81 | ASN332 | -0.3007 |
| 1350     | H    | -9.4504  | 15.6009 | -12.9526 | H    | 81 | ASN332 | 0.1885  |
| 1351     | HA   | -9.7237  | 15.2608 | -15.7038 | H    | 81 | ASN332 | 0.0826  |
| 1352     | HB3  | -12.0664 | 16.0640 | -15.4670 | H    | 81 | ASN332 | 0.0551  |
| 1353     | HB2  | -11.6828 | 16.8140 | -13.8950 | H    | 81 | ASN332 | 0.0551  |
| 1354     | HD21 | -13.6875 | 15.2921 | -13.4063 | H    | 81 | ASN332 | 0.1814  |
| 1355     | HD22 | -13.2720 | 13.7063 | -12.8688 | H    | 81 | ASN332 | 0.1814  |
| 1356     | N    | -9.5417  | 18.4814 | -14.8084 | N.am | 82 | ASN333 | -0.2615 |
| BACKBONE |      |          |         |          |      |    |        |         |
| 1357     | CA   | -9.3307  | 19.8073 | -15.3853 | C.3  | 82 | ASN333 | 0.1476  |
| BACKBONE |      |          |         |          |      |    |        |         |
| 1358     | C    | -8.0307  | 19.8574 | -16.1569 | C.2  | 82 | ASN333 | 0.2063  |
| BACKBONE |      |          |         |          |      |    |        |         |
| 1359     | O    | -7.9866  | 20.5175 | -17.1836 | O.2  | 82 | ASN333 | -0.3942 |
| BACKBONE |      |          |         |          |      |    |        |         |
| 1360     | CB   | -9.3147  | 20.9162 | -14.3000 | C.3  | 82 | ASN333 | 0.0773  |
| 1361     | CG   | -10.5330 | 20.8401 | -13.4043 | C.2  | 82 | ASN333 | 0.1780  |
| 1362     | OD1  | -10.3740 | 20.6174 | -12.2172 | O.2  | 82 | ASN333 | -0.3970 |
| 1363     | ND2  | -11.7630 | 21.0195 | -13.9405 | N.am | 82 | ASN333 | -0.3007 |
| 1364     | H    | -9.5708  | 18.3853 | -13.8119 | H    | 82 | ASN333 | 0.1885  |
| 1365     | HA   | -10.1606 | 20.0079 | -16.0828 | H    | 82 | ASN333 | 0.0826  |
| 1366     | HB3  | -9.2823  | 21.9074 | -14.7774 | H    | 82 | ASN333 | 0.0551  |
| 1367     | HB2  | -8.4052  | 20.8037 | -13.6887 | H    | 82 | ASN333 | 0.0551  |
| 1368     | HD21 | -11.8869 | 21.2224 | -14.9112 | H    | 82 | ASN333 | 0.1814  |
| 1369     | HD22 | -12.5698 | 20.9547 | -13.3524 | H    | 82 | ASN333 | 0.1814  |
| 1370     | N    | -6.9567  | 19.1750 | -15.6964 | N.am | 83 | ILE334 | -0.2633 |
| BACKBONE |      |          |         |          |      |    |        |         |
| 1371     | CA   | -5.7112  | 19.2039 | -16.4603 | C.3  | 83 | ILE334 | 0.1335  |
| BACKBONE |      |          |         |          |      |    |        |         |
| 1372     | C    | -5.9667  | 18.6035 | -17.8236 | C.2  | 83 | ILE334 | 0.2043  |
| BACKBONE |      |          |         |          |      |    |        |         |
| 1373     | O    | -5.6499  | 19.2410 | -18.8155 | O.2  | 83 | ILE334 | -0.3944 |
| BACKBONE |      |          |         |          |      |    |        |         |
| 1374     | CB   | -4.5142  | 18.4865 | -15.7633 | C.3  | 83 | ILE334 | -0.0037 |
| 1375     | CG1  | -4.1919  | 19.0825 | -14.3531 | C.3  | 83 | ILE334 | -0.0491 |
| 1376     | CG2  | -3.2720  | 18.4944 | -16.7040 | C.3  | 83 | ILE334 | -0.0582 |
| 1377     | CD1  | -4.1524  | 20.6318 | -14.2843 | C.3  | 83 | ILE334 | -0.0648 |
| 1378     | H    | -7.0041  | 18.6346 | -14.8561 | H    | 83 | ILE334 | 0.1883  |
| 1379     | HA   | -5.4315  | 20.2570 | -16.6245 | H    | 83 | ILE334 | 0.0803  |
| 1380     | HB   | -4.7756  | 17.4244 | -15.6097 | H    | 83 | ILE334 | 0.0345  |
| 1381     | HG13 | -3.2155  | 18.7069 | -14.0146 | H    | 83 | ILE334 | 0.0267  |
| 1382     | HG12 | -4.9320  | 18.7349 | -13.6166 | H    | 83 | ILE334 | 0.0267  |
| 1383     | HG23 | -3.4549  | 17.8844 | -17.6029 | H    | 83 | ILE334 | 0.0235  |
| 1384     | HG22 | -2.3880  | 18.0749 | -16.2006 | H    | 83 | ILE334 | 0.0235  |
| 1385     | HG21 | -3.0429  | 19.5180 | -17.0317 | H    | 83 | ILE334 | 0.0235  |

|          |      |          |         |          |      |    |        |         |
|----------|------|----------|---------|----------|------|----|--------|---------|
| 1386     | HD13 | -3.4901  | 21.0422 | -15.0603 | H    | 83 | ILE334 | 0.0230  |
| 1387     | HD12 | -3.7781  | 20.9512 | -13.2991 | H    | 83 | ILE334 | 0.0230  |
| 1388     | HD11 | -5.1598  | 21.0581 | -14.4081 | H    | 83 | ILE334 | 0.0230  |
| 1389     | N    | -6.5366  | 17.3812 | -17.8989 | N.am | 84 | HIS335 | -0.2619 |
| BACKBONE |      |          |         |          |      |    |        |         |
| 1390     | CA   | -6.7693  | 16.7701 | -19.2070 | C.3  | 84 | HIS335 | 0.1422  |
| BACKBONE |      |          |         |          |      |    |        |         |
| 1391     | C    | -7.8409  | 17.5069 | -19.9812 | C.2  | 84 | HIS335 | 0.2060  |
| BACKBONE |      |          |         |          |      |    |        |         |
| 1392     | O    | -7.8431  | 17.3841 | -21.1953 | O.2  | 84 | HIS335 | -0.3942 |
| BACKBONE |      |          |         |          |      |    |        |         |
| 1393     | CB   | -7.1319  | 15.2664 | -19.0837 | C.3  | 84 | HIS335 | 0.0460  |
| 1394     | CG   | -5.9154  | 14.4754 | -18.6654 | C.2  | 84 | HIS335 | 0.0945  |
| 1395     | ND1  | -5.1380  | 13.8402 | -19.5102 | N.2  | 84 | HIS335 | -0.1129 |
| 1396     | CD2  | -5.4598  | 14.3113 | -17.4070 | C.2  | 84 | HIS335 | -0.0242 |
| 1397     | CE1  | -4.1807  | 13.2531 | -18.8659 | C.2  | 84 | HIS335 | 0.1251  |
| 1398     | NE2  | -4.3027  | 13.4851 | -17.6396 | N.2  | 84 | HIS335 | -0.3410 |
| 1399     | H    | -6.8278  | 16.9012 | -17.0700 | H    | 84 | HIS335 | 0.1885  |
| 1400     | HA   | -5.8372  | 16.8369 | -19.7937 | H    | 84 | HIS335 | 0.0824  |
| 1401     | HB3  | -7.4833  | 14.8755 | -20.0516 | H    | 84 | HIS335 | 0.0492  |
| 1402     | HB2  | -7.9457  | 15.1389 | -18.3532 | H    | 84 | HIS335 | 0.0492  |
| 1403     | HD2  | -5.8459  | 14.6914 | -16.4673 | H    | 84 | HIS335 | 0.0325  |
| 1404     | HE1  | -3.3970  | 12.6510 | -19.3209 | H    | 84 | HIS335 | 0.1183  |
| 1405     | N    | -8.7578  | 18.2746 | -19.3467 | N.am | 85 | LEU336 | -0.2636 |
| BACKBONE |      |          |         |          |      |    |        |         |
| 1406     | CA   | -9.7736  | 18.9817 | -20.1287 | C.3  | 85 | LEU336 | 0.1312  |
| BACKBONE |      |          |         |          |      |    |        |         |
| 1407     | C    | -9.0975  | 19.7638 | -21.2343 | C.2  | 85 | LEU336 | 0.2040  |
| BACKBONE |      |          |         |          |      |    |        |         |
| 1408     | O    | -9.4896  | 19.6086 | -22.3805 | O.2  | 85 | LEU336 | -0.3944 |
| BACKBONE |      |          |         |          |      |    |        |         |
| 1409     | CB   | -10.6330 | 19.9343 | -19.2477 | C.3  | 85 | LEU336 | -0.0101 |
| 1410     | CG   | -11.6894 | 20.7748 | -20.0286 | C.3  | 85 | LEU336 | -0.0425 |
| 1411     | CD1  | -12.7705 | 19.8851 | -20.7032 | C.3  | 85 | LEU336 | -0.0625 |
| 1412     | CD2  | -12.3668 | 21.7876 | -19.0618 | C.3  | 85 | LEU336 | -0.0625 |
| 1413     | H    | -8.7759  | 18.3522 | -18.3499 | H    | 85 | LEU336 | 0.1883  |
| 1414     | HA   | -10.4290 | 18.2095 | -20.5624 | H    | 85 | LEU336 | 0.0800  |
| 1415     | HB3  | -9.9532  | 20.6341 | -18.7405 | H    | 85 | LEU336 | 0.0315  |
| 1416     | HB2  | -11.1433 | 19.3394 | -18.4731 | H    | 85 | LEU336 | 0.0315  |
| 1417     | HG   | -11.1862 | 21.3582 | -20.8184 | H    | 85 | LEU336 | 0.0298  |
| 1418     | HD13 | -12.3345 | 19.2563 | -21.4932 | H    | 85 | LEU336 | 0.0232  |
| 1419     | HD12 | -13.5447 | 20.5136 | -21.1703 | H    | 85 | LEU336 | 0.0232  |
| 1420     | HD11 | -13.2528 | 19.2357 | -19.9567 | H    | 85 | LEU336 | 0.0232  |
| 1421     | HD23 | -12.8910 | 21.2547 | -18.2536 | H    | 85 | LEU336 | 0.0232  |
| 1422     | HD22 | -13.0965 | 22.4115 | -19.6010 | H    | 85 | LEU336 | 0.0232  |
| 1423     | HD21 | -11.6163 | 22.4559 | -18.6108 | H    | 85 | LEU336 | 0.0232  |
| 1424     | N    | -8.0827  | 20.5971 | -20.8993 | N.am | 86 | THR337 | -0.2613 |
| BACKBONE |      |          |         |          |      |    |        |         |
| 1425     | CA   | -7.3871  | 21.3962 | -21.9113 | C.3  | 86 | THR337 | 0.1564  |
| BACKBONE |      |          |         |          |      |    |        |         |
| 1426     | C    | -5.9690  | 20.9325 | -22.1860 | C.2  | 86 | THR337 | 0.2046  |
| BACKBONE |      |          |         |          |      |    |        |         |

|          |      |         |         |          |       |    |        |         |
|----------|------|---------|---------|----------|-------|----|--------|---------|
| 1427     | O    | -5.3917 | 21.4454 | -23.1322 | O.2   | 86 | THR337 | -0.3944 |
| BACKBONE |      |         |         |          |       |    |        |         |
| 1428     | CB   | -7.3188 | 22.8606 | -21.3980 | C.3   | 86 | THR337 | 0.0924  |
| 1429     | OG1  | -6.5360 | 22.8636 | -20.1906 | O.3   | 86 | THR337 | -0.3874 |
| 1430     | CG2  | -8.7368 | 23.4296 | -21.1232 | C.3   | 86 | THR337 | -0.0346 |
| 1431     | H    | -7.7907 | 20.6960 | -19.9447 | H     | 86 | THR337 | 0.1884  |
| 1432     | HA   | -7.9291 | 21.3998 | -22.8720 | H     | 86 | THR337 | 0.0826  |
| 1433     | HB   | -6.8247 | 23.4880 | -22.1627 | H     | 86 | THR337 | 0.0639  |
| 1434     | HG1  | -6.4233 | 23.7359 | -19.8279 | H     | 86 | THR337 | 0.2101  |
| 1435     | HG22 | -8.6698 | 24.4924 | -20.8432 | H     | 86 | THR337 | 0.0257  |
| 1436     | HG21 | -9.2148 | 22.8851 | -20.2957 | H     | 86 | THR337 | 0.0257  |
| 1437     | HG23 | -9.3694 | 23.3441 | -22.0205 | H     | 86 | THR337 | 0.0257  |
| 1438     | N    | -5.3689 | 20.0066 | -21.3990 | N.am  | 87 | HIS338 | -0.2845 |
| BACKBONE |      |         |         |          |       |    |        |         |
| 1439     | CA   | -3.9536 | 19.6775 | -21.5777 | C.3   | 87 | HIS338 | 0.0356  |
| BACKBONE |      |         |         |          |       |    |        |         |
| 1440     | C    | -3.1335 | 20.9424 | -21.6161 | C.2   | 87 | HIS338 | -0.1818 |
| BACKBONE |      |         |         |          |       |    |        |         |
| 1441     | O    | -2.4359 | 21.2268 | -22.5762 | O.2   | 87 | HIS338 | -0.7197 |
| BACKBONE |      |         |         |          |       |    |        |         |
| 1442     | CB   | -3.7268 | 18.7773 | -22.8188 | C.3   | 87 | HIS338 | 0.0802  |
| 1443     | CG   | -4.5079 | 17.4998 | -22.6600 | C.2   | 87 | HIS338 | 0.1946  |
| 1444     | ND1  | -5.7042 | 17.3007 | -23.1702 | N.pl3 | 87 | HIS338 | -0.1587 |
| 1445     | CD2  | -4.0937 | 16.4095 | -21.9808 | C.2   | 87 | HIS338 | 0.1262  |
| 1446     | CE1  | -6.1127 | 16.1099 | -22.8649 | C.cat | 87 | HIS338 | 0.1842  |
| 1447     | NE2  | -5.2291 | 15.5515 | -22.1740 | N.2   | 87 | HIS338 | -0.2010 |
| 1448     | H    | -5.8616 | 19.5344 | -20.6688 | H     | 87 | HIS338 | 0.1858  |
| 1449     | HA   | -3.5869 | 19.1254 | -20.6946 | H     | 87 | HIS338 | 0.0538  |
| 1450     | HB3  | -2.6550 | 18.5315 | -22.8983 | H     | 87 | HIS338 | 0.0775  |
| 1451     | HB2  | -4.0291 | 19.2912 | -23.7442 | H     | 87 | HIS338 | 0.0775  |
| 1452     | HD1  | -6.2367 | 17.9862 | -23.7282 | H     | 87 | HIS338 | 0.2700  |
| 1453     | HD2  | -3.1694 | 16.2272 | -21.4367 | H     | 87 | HIS338 | 0.1326  |
| 1454     | HE1  | -7.0636 | 15.6597 | -23.1496 | H     | 87 | HIS338 | 0.1885  |

@<TRIPOS>BOND

|    |   |    |    |                     |
|----|---|----|----|---------------------|
| 1  | 1 | 2  | 1  | BACKBONE            |
| 2  | 1 | 9  | 1  |                     |
| 3  | 1 | 18 | 1  |                     |
| 4  | 2 | 3  | 1  | BACKBONE            |
| 5  | 2 | 5  | 1  |                     |
| 6  | 2 | 10 | 1  |                     |
| 7  | 3 | 4  | 2  | BACKBONE            |
| 8  | 3 | 21 | am | BACKBONE   INTERRES |
| 9  | 5 | 6  | 1  |                     |
| 10 | 5 | 11 | 1  |                     |
| 11 | 5 | 12 | 1  |                     |
| 12 | 6 | 7  | 1  |                     |
| 13 | 6 | 13 | 1  |                     |
| 14 | 6 | 14 | 1  |                     |
| 15 | 7 | 8  | 1  |                     |
| 16 | 7 | 15 | 1  |                     |
| 17 | 7 | 16 | 1  |                     |
| 18 | 8 | 17 | 1  |                     |

|    |    |    |    |                     |
|----|----|----|----|---------------------|
| 19 | 8  | 19 | 1  |                     |
| 20 | 8  | 20 | 1  |                     |
| 21 | 21 | 22 | 1  | BACKBONE            |
| 22 | 21 | 30 | 1  |                     |
| 23 | 22 | 23 | 1  | BACKBONE            |
| 24 | 22 | 25 | 1  |                     |
| 25 | 22 | 31 | 1  |                     |
| 26 | 23 | 24 | 2  | BACKBONE            |
| 27 | 23 | 38 | am | BACKBONE   INTERRES |
| 28 | 25 | 26 | 1  |                     |
| 29 | 25 | 32 | 1  |                     |
| 30 | 25 | 33 | 1  |                     |
| 31 | 26 | 27 | 1  |                     |
| 32 | 26 | 34 | 1  |                     |
| 33 | 26 | 35 | 1  |                     |
| 34 | 27 | 28 | 2  |                     |
| 35 | 27 | 29 | am |                     |
| 36 | 29 | 36 | 1  |                     |
| 37 | 29 | 37 | 1  |                     |
| 38 | 38 | 39 | 1  | BACKBONE            |
| 39 | 38 | 45 | 1  |                     |
| 40 | 39 | 40 | 1  | BACKBONE            |
| 41 | 39 | 42 | 1  |                     |
| 42 | 39 | 46 | 1  |                     |
| 43 | 40 | 41 | 2  | BACKBONE            |
| 44 | 40 | 52 | am | BACKBONE   INTERRES |
| 45 | 42 | 43 | 1  |                     |
| 46 | 42 | 44 | 1  |                     |
| 47 | 42 | 47 | 1  |                     |
| 48 | 43 | 48 | 1  |                     |
| 49 | 44 | 49 | 1  |                     |
| 50 | 44 | 50 | 1  |                     |
| 51 | 44 | 51 | 1  |                     |
| 52 | 52 | 53 | 1  | BACKBONE            |
| 53 | 52 | 62 | 1  |                     |
| 54 | 53 | 54 | 1  | BACKBONE            |
| 55 | 53 | 56 | 1  |                     |
| 56 | 53 | 63 | 1  |                     |
| 57 | 54 | 55 | 2  | BACKBONE            |
| 58 | 54 | 69 | am | BACKBONE   INTERRES |
| 59 | 56 | 57 | 1  |                     |
| 60 | 56 | 64 | 1  |                     |
| 61 | 56 | 65 | 1  |                     |
| 62 | 57 | 58 | 1  |                     |
| 63 | 57 | 59 | 2  |                     |
| 64 | 58 | 60 | 1  |                     |
| 65 | 58 | 66 | 1  |                     |
| 66 | 59 | 61 | 1  |                     |
| 67 | 59 | 67 | 1  |                     |
| 68 | 60 | 61 | 2  |                     |
| 69 | 60 | 68 | 1  |                     |
| 70 | 69 | 70 | 1  | BACKBONE            |

|     |     |     |    |                     |
|-----|-----|-----|----|---------------------|
| 71  | 69  | 74  | 1  |                     |
| 72  | 70  | 71  | 1  | BACKBONE            |
| 73  | 70  | 73  | 1  |                     |
| 74  | 70  | 75  | 1  |                     |
| 75  | 71  | 72  | 2  | BACKBONE            |
| 76  | 71  | 79  | am | BACKBONE   INTERRES |
| 77  | 73  | 76  | 1  |                     |
| 78  | 73  | 77  | 1  |                     |
| 79  | 73  | 78  | 1  |                     |
| 80  | 79  | 80  | 1  | BACKBONE            |
| 81  | 79  | 84  | 1  |                     |
| 82  | 80  | 81  | 1  | BACKBONE            |
| 83  | 80  | 83  | 1  |                     |
| 84  | 80  | 85  | 1  |                     |
| 85  | 81  | 82  | 2  | BACKBONE            |
| 86  | 81  | 89  | am | BACKBONE   INTERRES |
| 87  | 83  | 86  | 1  |                     |
| 88  | 83  | 87  | 1  |                     |
| 89  | 83  | 88  | 1  |                     |
| 90  | 89  | 90  | 1  | BACKBONE            |
| 91  | 89  | 100 | 1  |                     |
| 92  | 90  | 91  | 1  | BACKBONE            |
| 93  | 90  | 93  | 1  |                     |
| 94  | 90  | 101 | 1  |                     |
| 95  | 91  | 92  | 2  | BACKBONE            |
| 96  | 91  | 113 | am | BACKBONE   INTERRES |
| 97  | 93  | 94  | 1  |                     |
| 98  | 93  | 102 | 1  |                     |
| 99  | 93  | 103 | 1  |                     |
| 100 | 94  | 95  | 1  |                     |
| 101 | 94  | 104 | 1  |                     |
| 102 | 94  | 105 | 1  |                     |
| 103 | 95  | 96  | 1  |                     |
| 104 | 95  | 106 | 1  |                     |
| 105 | 95  | 107 | 1  |                     |
| 106 | 96  | 97  | ar |                     |
| 107 | 96  | 108 | 1  |                     |
| 108 | 97  | 98  | ar |                     |
| 109 | 97  | 99  | ar |                     |
| 110 | 98  | 109 | 1  |                     |
| 111 | 98  | 110 | 1  |                     |
| 112 | 99  | 111 | 1  |                     |
| 113 | 99  | 112 | 1  |                     |
| 114 | 113 | 114 | 1  | BACKBONE            |
| 115 | 113 | 121 | 1  |                     |
| 116 | 114 | 115 | 1  | BACKBONE            |
| 117 | 114 | 117 | 1  |                     |
| 118 | 114 | 122 | 1  |                     |
| 119 | 115 | 116 | 2  | BACKBONE            |
| 120 | 115 | 132 | am | BACKBONE   INTERRES |
| 121 | 117 | 118 | 1  |                     |
| 122 | 117 | 123 | 1  |                     |

|     |     |     |    |                     |
|-----|-----|-----|----|---------------------|
| 123 | 117 | 124 | 1  |                     |
| 124 | 118 | 119 | 1  |                     |
| 125 | 118 | 125 | 1  |                     |
| 126 | 118 | 126 | 1  |                     |
| 127 | 119 | 120 | 1  |                     |
| 128 | 119 | 127 | 1  |                     |
| 129 | 119 | 128 | 1  |                     |
| 130 | 120 | 129 | 1  |                     |
| 131 | 120 | 130 | 1  |                     |
| 132 | 120 | 131 | 1  |                     |
| 133 | 132 | 133 | 1  | BACKBONE            |
| 134 | 132 | 143 | 1  |                     |
| 135 | 133 | 134 | 1  | BACKBONE            |
| 136 | 133 | 136 | 1  |                     |
| 137 | 133 | 144 | 1  |                     |
| 138 | 134 | 135 | 2  | BACKBONE            |
| 139 | 134 | 156 | am | BACKBONE   INTERRES |
| 140 | 136 | 137 | 1  |                     |
| 141 | 136 | 145 | 1  |                     |
| 142 | 136 | 146 | 1  |                     |
| 143 | 137 | 138 | 1  |                     |
| 144 | 137 | 147 | 1  |                     |
| 145 | 137 | 148 | 1  |                     |
| 146 | 138 | 139 | 1  |                     |
| 147 | 138 | 149 | 1  |                     |
| 148 | 138 | 150 | 1  |                     |
| 149 | 139 | 140 | ar |                     |
| 150 | 139 | 151 | 1  |                     |
| 151 | 140 | 141 | ar |                     |
| 152 | 140 | 142 | ar |                     |
| 153 | 141 | 152 | 1  |                     |
| 154 | 141 | 153 | 1  |                     |
| 155 | 142 | 154 | 1  |                     |
| 156 | 142 | 155 | 1  |                     |
| 157 | 156 | 157 | 1  | BACKBONE            |
| 158 | 156 | 163 | 1  |                     |
| 159 | 157 | 158 | 1  | BACKBONE            |
| 160 | 157 | 160 | 1  |                     |
| 161 | 157 | 164 | 1  |                     |
| 162 | 158 | 159 | 2  | BACKBONE            |
| 163 | 158 | 170 | am | BACKBONE   INTERRES |
| 164 | 160 | 161 | 1  |                     |
| 165 | 160 | 162 | 1  |                     |
| 166 | 160 | 165 | 1  |                     |
| 167 | 161 | 166 | 1  |                     |
| 168 | 162 | 167 | 1  |                     |
| 169 | 162 | 168 | 1  |                     |
| 170 | 162 | 169 | 1  |                     |
| 171 | 170 | 171 | 1  | BACKBONE            |
| 172 | 170 | 181 | 1  |                     |
| 173 | 171 | 172 | 1  | BACKBONE            |
| 174 | 171 | 174 | 1  |                     |



|     |     |     |    |                     |
|-----|-----|-----|----|---------------------|
| 175 | 171 | 182 | 1  |                     |
| 176 | 172 | 173 | 2  | BACKBONE            |
| 177 | 172 | 190 | am | BACKBONE   INTERRES |
| 178 | 174 | 175 | 1  |                     |
| 179 | 174 | 183 | 1  |                     |
| 180 | 174 | 184 | 1  |                     |
| 181 | 175 | 176 | ar |                     |
| 182 | 175 | 177 | ar |                     |
| 183 | 176 | 178 | ar |                     |
| 184 | 176 | 185 | 1  |                     |
| 185 | 177 | 179 | ar |                     |
| 186 | 177 | 186 | 1  |                     |
| 187 | 178 | 180 | ar |                     |
| 188 | 178 | 187 | 1  |                     |
| 189 | 179 | 180 | ar |                     |
| 190 | 179 | 188 | 1  |                     |
| 191 | 180 | 189 | 1  |                     |
| 192 | 190 | 191 | 1  | BACKBONE            |
| 193 | 190 | 198 | 1  |                     |
| 194 | 191 | 192 | 1  | BACKBONE            |
| 195 | 191 | 194 | 1  |                     |
| 196 | 191 | 199 | 1  |                     |
| 197 | 192 | 193 | 2  | BACKBONE            |
| 198 | 192 | 209 | am | BACKBONE   INTERRES |
| 199 | 194 | 195 | 1  |                     |
| 200 | 194 | 200 | 1  |                     |
| 201 | 194 | 201 | 1  |                     |
| 202 | 195 | 196 | 1  |                     |
| 203 | 195 | 202 | 1  |                     |
| 204 | 195 | 203 | 1  |                     |
| 205 | 196 | 197 | 1  |                     |
| 206 | 196 | 204 | 1  |                     |
| 207 | 196 | 205 | 1  |                     |
| 208 | 197 | 206 | 1  |                     |
| 209 | 197 | 207 | 1  |                     |
| 210 | 197 | 208 | 1  |                     |
| 211 | 209 | 210 | 1  | BACKBONE            |
| 212 | 209 | 221 | 1  |                     |
| 213 | 210 | 211 | 1  | BACKBONE            |
| 214 | 210 | 213 | 1  |                     |
| 215 | 210 | 222 | 1  |                     |
| 216 | 211 | 212 | 2  | BACKBONE            |
| 217 | 211 | 230 | am | BACKBONE   INTERRES |
| 218 | 213 | 214 | 1  |                     |
| 219 | 213 | 223 | 1  |                     |
| 220 | 213 | 224 | 1  |                     |
| 221 | 214 | 215 | ar |                     |
| 222 | 214 | 216 | ar |                     |
| 223 | 215 | 217 | ar |                     |
| 224 | 215 | 225 | 1  |                     |
| 225 | 216 | 218 | ar |                     |
| 226 | 216 | 226 | 1  |                     |

|     |     |     |    |                     |
|-----|-----|-----|----|---------------------|
| 227 | 217 | 219 | ar |                     |
| 228 | 217 | 227 | 1  |                     |
| 229 | 218 | 219 | ar |                     |
| 230 | 218 | 228 | 1  |                     |
| 231 | 219 | 220 | 1  |                     |
| 232 | 220 | 229 | 1  |                     |
| 233 | 230 | 231 | 1  | BACKBONE            |
| 234 | 230 | 244 | 1  |                     |
| 235 | 231 | 232 | 1  | BACKBONE            |
| 236 | 231 | 234 | 1  |                     |
| 237 | 231 | 245 | 1  |                     |
| 238 | 232 | 233 | 2  | BACKBONE            |
| 239 | 232 | 254 | am | BACKBONE   INTERRES |
| 240 | 234 | 235 | 1  |                     |
| 241 | 234 | 246 | 1  |                     |
| 242 | 234 | 247 | 1  |                     |
| 243 | 235 | 236 | 2  |                     |
| 244 | 235 | 237 | 1  |                     |
| 245 | 236 | 238 | 1  |                     |
| 246 | 236 | 248 | 1  |                     |
| 247 | 237 | 239 | ar |                     |
| 248 | 237 | 240 | ar |                     |
| 249 | 238 | 239 | 1  |                     |
| 250 | 238 | 249 | 1  |                     |
| 251 | 239 | 241 | ar |                     |
| 252 | 240 | 242 | ar |                     |
| 253 | 240 | 250 | 1  |                     |
| 254 | 241 | 243 | ar |                     |
| 255 | 241 | 251 | 1  |                     |
| 256 | 242 | 243 | ar |                     |
| 257 | 242 | 252 | 1  |                     |
| 258 | 243 | 253 | 1  |                     |
| 259 | 254 | 255 | 1  | BACKBONE            |
| 260 | 254 | 260 | 1  |                     |
| 261 | 255 | 256 | 1  | BACKBONE            |
| 262 | 255 | 258 | 1  |                     |
| 263 | 255 | 261 | 1  |                     |
| 264 | 256 | 257 | 2  | BACKBONE            |
| 265 | 256 | 268 | am | BACKBONE   INTERRES |
| 266 | 258 | 259 | 1  |                     |
| 267 | 258 | 262 | 1  |                     |
| 268 | 258 | 263 | 1  |                     |
| 269 | 259 | 260 | 1  |                     |
| 270 | 259 | 264 | 1  |                     |
| 271 | 259 | 265 | 1  |                     |
| 272 | 260 | 266 | 1  |                     |
| 273 | 260 | 267 | 1  |                     |
| 274 | 268 | 269 | 1  | BACKBONE            |
| 275 | 268 | 274 | 1  |                     |
| 276 | 269 | 270 | 1  | BACKBONE            |
| 277 | 269 | 272 | 1  |                     |
| 278 | 269 | 275 | 1  |                     |

|     |     |     |    |                     |
|-----|-----|-----|----|---------------------|
| 279 | 270 | 271 | 2  | BACKBONE            |
| 280 | 270 | 279 | am | BACKBONE   INTERRES |
| 281 | 272 | 273 | 1  |                     |
| 282 | 272 | 276 | 1  |                     |
| 283 | 272 | 277 | 1  |                     |
| 284 | 273 | 278 | 1  |                     |
| 285 | 279 | 280 | 1  | BACKBONE            |
| 286 | 279 | 285 | 1  |                     |
| 287 | 280 | 281 | 1  | BACKBONE            |
| 288 | 280 | 283 | 1  |                     |
| 289 | 280 | 286 | 1  |                     |
| 290 | 281 | 282 | 2  | BACKBONE            |
| 291 | 281 | 290 | am | BACKBONE   INTERRES |
| 292 | 283 | 284 | 1  |                     |
| 293 | 283 | 287 | 1  |                     |
| 294 | 283 | 288 | 1  |                     |
| 295 | 284 | 289 | 1  |                     |
| 296 | 290 | 291 | 1  | BACKBONE            |
| 297 | 290 | 297 | 1  |                     |
| 298 | 291 | 292 | 1  | BACKBONE            |
| 299 | 291 | 294 | 1  |                     |
| 300 | 291 | 298 | 1  |                     |
| 301 | 292 | 293 | 2  | BACKBONE            |
| 302 | 292 | 306 | am | BACKBONE   INTERRES |
| 303 | 294 | 295 | 1  |                     |
| 304 | 294 | 296 | 1  |                     |
| 305 | 294 | 299 | 1  |                     |
| 306 | 295 | 300 | 1  |                     |
| 307 | 295 | 301 | 1  |                     |
| 308 | 295 | 302 | 1  |                     |
| 309 | 296 | 303 | 1  |                     |
| 310 | 296 | 304 | 1  |                     |
| 311 | 296 | 305 | 1  |                     |
| 312 | 306 | 307 | 1  | BACKBONE            |
| 313 | 306 | 312 | 1  |                     |
| 314 | 307 | 308 | 1  | BACKBONE            |
| 315 | 307 | 310 | 1  |                     |
| 316 | 307 | 313 | 1  |                     |
| 317 | 308 | 309 | 2  | BACKBONE            |
| 318 | 308 | 320 | am | BACKBONE   INTERRES |
| 319 | 310 | 311 | 1  |                     |
| 320 | 310 | 314 | 1  |                     |
| 321 | 310 | 315 | 1  |                     |
| 322 | 311 | 312 | 1  |                     |
| 323 | 311 | 316 | 1  |                     |
| 324 | 311 | 317 | 1  |                     |
| 325 | 312 | 318 | 1  |                     |
| 326 | 312 | 319 | 1  |                     |
| 327 | 320 | 321 | 1  | BACKBONE            |
| 328 | 320 | 327 | 1  |                     |
| 329 | 321 | 322 | 1  | BACKBONE            |
| 330 | 321 | 324 | 1  |                     |

|     |     |     |    |                     |
|-----|-----|-----|----|---------------------|
| 331 | 321 | 328 | 1  |                     |
| 332 | 322 | 323 | 2  | BACKBONE            |
| 333 | 322 | 336 | am | BACKBONE   INTERRES |
| 334 | 324 | 325 | 1  |                     |
| 335 | 324 | 326 | 1  |                     |
| 336 | 324 | 329 | 1  |                     |
| 337 | 325 | 330 | 1  |                     |
| 338 | 325 | 331 | 1  |                     |
| 339 | 325 | 332 | 1  |                     |
| 340 | 326 | 333 | 1  |                     |
| 341 | 326 | 334 | 1  |                     |
| 342 | 326 | 335 | 1  |                     |
| 343 | 336 | 337 | 1  | BACKBONE            |
| 344 | 336 | 345 | 1  |                     |
| 345 | 337 | 338 | 1  | BACKBONE            |
| 346 | 337 | 340 | 1  |                     |
| 347 | 337 | 346 | 1  |                     |
| 348 | 338 | 339 | 2  | BACKBONE            |
| 349 | 338 | 353 | am | BACKBONE   INTERRES |
| 350 | 340 | 341 | 1  |                     |
| 351 | 340 | 347 | 1  |                     |
| 352 | 340 | 348 | 1  |                     |
| 353 | 341 | 342 | 1  |                     |
| 354 | 341 | 349 | 1  |                     |
| 355 | 341 | 350 | 1  |                     |
| 356 | 342 | 343 | 2  |                     |
| 357 | 342 | 344 | am |                     |
| 358 | 344 | 351 | 1  |                     |
| 359 | 344 | 352 | 1  |                     |
| 360 | 353 | 354 | 1  | BACKBONE            |
| 361 | 353 | 359 | 1  |                     |
| 362 | 354 | 355 | 1  | BACKBONE            |
| 363 | 354 | 357 | 1  |                     |
| 364 | 354 | 360 | 1  |                     |
| 365 | 355 | 356 | 2  | BACKBONE            |
| 366 | 355 | 367 | am | BACKBONE   INTERRES |
| 367 | 357 | 358 | 1  |                     |
| 368 | 357 | 361 | 1  |                     |
| 369 | 357 | 362 | 1  |                     |
| 370 | 358 | 359 | 1  |                     |
| 371 | 358 | 363 | 1  |                     |
| 372 | 358 | 364 | 1  |                     |
| 373 | 359 | 365 | 1  |                     |
| 374 | 359 | 366 | 1  |                     |
| 375 | 367 | 368 | 1  | BACKBONE            |
| 376 | 367 | 376 | 1  |                     |
| 377 | 368 | 369 | 1  | BACKBONE            |
| 378 | 368 | 371 | 1  |                     |
| 379 | 368 | 377 | 1  |                     |
| 380 | 369 | 370 | 2  | BACKBONE            |
| 381 | 369 | 382 | am | BACKBONE   INTERRES |
| 382 | 371 | 372 | 1  |                     |

|     |     |     |    |                     |
|-----|-----|-----|----|---------------------|
| 383 | 371 | 378 | 1  |                     |
| 384 | 371 | 379 | 1  |                     |
| 385 | 372 | 373 | 1  |                     |
| 386 | 372 | 380 | 1  |                     |
| 387 | 372 | 381 | 1  |                     |
| 388 | 373 | 374 | ar |                     |
| 389 | 373 | 375 | ar |                     |
| 390 | 382 | 383 | 1  | BACKBONE            |
| 391 | 382 | 391 | 1  |                     |
| 392 | 383 | 384 | 1  | BACKBONE            |
| 393 | 383 | 386 | 1  |                     |
| 394 | 383 | 392 | 1  |                     |
| 395 | 384 | 385 | 2  | BACKBONE            |
| 396 | 384 | 399 | am | BACKBONE   INTERRES |
| 397 | 386 | 387 | 1  |                     |
| 398 | 386 | 393 | 1  |                     |
| 399 | 386 | 394 | 1  |                     |
| 400 | 387 | 388 | 1  |                     |
| 401 | 387 | 395 | 1  |                     |
| 402 | 387 | 396 | 1  |                     |
| 403 | 388 | 389 | 2  |                     |
| 404 | 388 | 390 | am |                     |
| 405 | 390 | 397 | 1  |                     |
| 406 | 390 | 398 | 1  |                     |
| 407 | 399 | 400 | 1  | BACKBONE            |
| 408 | 399 | 407 | 1  |                     |
| 409 | 400 | 401 | 1  | BACKBONE            |
| 410 | 400 | 403 | 1  |                     |
| 411 | 400 | 408 | 1  |                     |
| 412 | 401 | 402 | 2  | BACKBONE            |
| 413 | 401 | 418 | am | BACKBONE   INTERRES |
| 414 | 403 | 404 | 1  |                     |
| 415 | 403 | 409 | 1  |                     |
| 416 | 403 | 410 | 1  |                     |
| 417 | 404 | 405 | 1  |                     |
| 418 | 404 | 406 | 1  |                     |
| 419 | 404 | 411 | 1  |                     |
| 420 | 405 | 412 | 1  |                     |
| 421 | 405 | 413 | 1  |                     |
| 422 | 405 | 414 | 1  |                     |
| 423 | 406 | 415 | 1  |                     |
| 424 | 406 | 416 | 1  |                     |
| 425 | 406 | 417 | 1  |                     |
| 426 | 418 | 419 | 1  | BACKBONE            |
| 427 | 418 | 423 | 1  |                     |
| 428 | 419 | 420 | 1  | BACKBONE            |
| 429 | 419 | 422 | 1  |                     |
| 430 | 419 | 424 | 1  |                     |
| 431 | 420 | 421 | 2  | BACKBONE            |
| 432 | 420 | 428 | am | BACKBONE   INTERRES |
| 433 | 422 | 425 | 1  |                     |
| 434 | 422 | 426 | 1  |                     |

|     |     |     |    |                     |
|-----|-----|-----|----|---------------------|
| 435 | 422 | 427 | 1  |                     |
| 436 | 428 | 429 | 1  | BACKBONE            |
| 437 | 428 | 433 | 1  |                     |
| 438 | 429 | 430 | 1  | BACKBONE            |
| 439 | 429 | 432 | 1  |                     |
| 440 | 429 | 434 | 1  |                     |
| 441 | 430 | 431 | 2  | BACKBONE            |
| 442 | 430 | 438 | am | BACKBONE   INTERRES |
| 443 | 432 | 435 | 1  |                     |
| 444 | 432 | 436 | 1  |                     |
| 445 | 432 | 437 | 1  |                     |
| 446 | 438 | 439 | 1  | BACKBONE            |
| 447 | 438 | 443 | 1  |                     |
| 448 | 439 | 440 | 1  | BACKBONE            |
| 449 | 439 | 442 | 1  |                     |
| 450 | 439 | 444 | 1  |                     |
| 451 | 440 | 441 | 2  | BACKBONE            |
| 452 | 440 | 448 | am | BACKBONE   INTERRES |
| 453 | 442 | 445 | 1  |                     |
| 454 | 442 | 446 | 1  |                     |
| 455 | 442 | 447 | 1  |                     |
| 456 | 448 | 449 | 1  | BACKBONE            |
| 457 | 448 | 452 | 1  |                     |
| 458 | 449 | 450 | 1  | BACKBONE            |
| 459 | 449 | 453 | 1  |                     |
| 460 | 449 | 454 | 1  |                     |
| 461 | 450 | 451 | 2  | BACKBONE            |
| 462 | 450 | 455 | am | BACKBONE   INTERRES |
| 463 | 455 | 456 | 1  | BACKBONE            |
| 464 | 455 | 466 | 1  |                     |
| 465 | 456 | 457 | 1  | BACKBONE            |
| 466 | 456 | 459 | 1  |                     |
| 467 | 456 | 467 | 1  |                     |
| 468 | 457 | 458 | 2  | BACKBONE            |
| 469 | 457 | 475 | am | BACKBONE   INTERRES |
| 470 | 459 | 460 | 1  |                     |
| 471 | 459 | 468 | 1  |                     |
| 472 | 459 | 469 | 1  |                     |
| 473 | 460 | 461 | ar |                     |
| 474 | 460 | 462 | ar |                     |
| 475 | 461 | 463 | ar |                     |
| 476 | 461 | 470 | 1  |                     |
| 477 | 462 | 464 | ar |                     |
| 478 | 462 | 471 | 1  |                     |
| 479 | 463 | 465 | ar |                     |
| 480 | 463 | 472 | 1  |                     |
| 481 | 464 | 465 | ar |                     |
| 482 | 464 | 473 | 1  |                     |
| 483 | 465 | 474 | 1  |                     |
| 484 | 475 | 476 | 1  | BACKBONE            |
| 485 | 475 | 487 | 1  |                     |
| 486 | 476 | 477 | 1  | BACKBONE            |

|     |     |     |    |                     |
|-----|-----|-----|----|---------------------|
| 487 | 476 | 479 | 1  |                     |
| 488 | 476 | 488 | 1  |                     |
| 489 | 477 | 478 | 2  | BACKBONE            |
| 490 | 477 | 496 | am | BACKBONE   INTERRES |
| 491 | 479 | 480 | 1  |                     |
| 492 | 479 | 489 | 1  |                     |
| 493 | 479 | 490 | 1  |                     |
| 494 | 480 | 481 | ar |                     |
| 495 | 480 | 482 | ar |                     |
| 496 | 481 | 483 | ar |                     |
| 497 | 481 | 491 | 1  |                     |
| 498 | 482 | 484 | ar |                     |
| 499 | 482 | 492 | 1  |                     |
| 500 | 483 | 485 | ar |                     |
| 501 | 483 | 493 | 1  |                     |
| 502 | 484 | 485 | ar |                     |
| 503 | 484 | 494 | 1  |                     |
| 504 | 485 | 486 | 1  |                     |
| 505 | 486 | 495 | 1  |                     |
| 506 | 496 | 497 | 1  | BACKBONE            |
| 507 | 496 | 508 | 1  |                     |
| 508 | 497 | 498 | 1  | BACKBONE            |
| 509 | 497 | 500 | 1  |                     |
| 510 | 497 | 509 | 1  |                     |
| 511 | 498 | 499 | 2  | BACKBONE            |
| 512 | 498 | 517 | am | BACKBONE   INTERRES |
| 513 | 500 | 501 | 1  |                     |
| 514 | 500 | 510 | 1  |                     |
| 515 | 500 | 511 | 1  |                     |
| 516 | 501 | 502 | ar |                     |
| 517 | 501 | 503 | ar |                     |
| 518 | 502 | 504 | ar |                     |
| 519 | 502 | 512 | 1  |                     |
| 520 | 503 | 505 | ar |                     |
| 521 | 503 | 513 | 1  |                     |
| 522 | 504 | 506 | ar |                     |
| 523 | 504 | 514 | 1  |                     |
| 524 | 505 | 506 | ar |                     |
| 525 | 505 | 515 | 1  |                     |
| 526 | 506 | 507 | 1  |                     |
| 527 | 507 | 516 | 1  |                     |
| 528 | 517 | 518 | 1  | BACKBONE            |
| 529 | 517 | 524 | 1  |                     |
| 530 | 518 | 519 | 1  | BACKBONE            |
| 531 | 518 | 521 | 1  |                     |
| 532 | 518 | 525 | 1  |                     |
| 533 | 519 | 520 | 2  | BACKBONE            |
| 534 | 519 | 533 | am | BACKBONE   INTERRES |
| 535 | 521 | 522 | 1  |                     |
| 536 | 521 | 523 | 1  |                     |
| 537 | 521 | 526 | 1  |                     |
| 538 | 522 | 527 | 1  |                     |

|     |     |     |    |                     |
|-----|-----|-----|----|---------------------|
| 539 | 522 | 528 | 1  |                     |
| 540 | 522 | 529 | 1  |                     |
| 541 | 523 | 530 | 1  |                     |
| 542 | 523 | 531 | 1  |                     |
| 543 | 523 | 532 | 1  |                     |
| 544 | 533 | 534 | 1  | BACKBONE            |
| 545 | 533 | 537 | 1  |                     |
| 546 | 534 | 535 | 1  | BACKBONE            |
| 547 | 534 | 538 | 1  |                     |
| 548 | 534 | 539 | 1  |                     |
| 549 | 535 | 536 | 2  | BACKBONE            |
| 550 | 535 | 540 | am | BACKBONE   INTERRES |
| 551 | 540 | 541 | 1  | BACKBONE            |
| 552 | 540 | 551 | 1  |                     |
| 553 | 541 | 542 | 1  | BACKBONE            |
| 554 | 541 | 544 | 1  |                     |
| 555 | 541 | 552 | 1  |                     |
| 556 | 542 | 543 | 2  | BACKBONE            |
| 557 | 542 | 564 | am | BACKBONE   INTERRES |
| 558 | 544 | 545 | 1  |                     |
| 559 | 544 | 553 | 1  |                     |
| 560 | 544 | 554 | 1  |                     |
| 561 | 545 | 546 | 1  |                     |
| 562 | 545 | 555 | 1  |                     |
| 563 | 545 | 556 | 1  |                     |
| 564 | 546 | 547 | 1  |                     |
| 565 | 546 | 557 | 1  |                     |
| 566 | 546 | 558 | 1  |                     |
| 567 | 547 | 548 | ar |                     |
| 568 | 547 | 559 | 1  |                     |
| 569 | 548 | 549 | ar |                     |
| 570 | 548 | 550 | ar |                     |
| 571 | 549 | 560 | 1  |                     |
| 572 | 549 | 561 | 1  |                     |
| 573 | 550 | 562 | 1  |                     |
| 574 | 550 | 563 | 1  |                     |
| 575 | 564 | 565 | 1  | BACKBONE            |
| 576 | 564 | 572 | 1  |                     |
| 577 | 565 | 566 | 1  | BACKBONE            |
| 578 | 565 | 568 | 1  |                     |
| 579 | 565 | 573 | 1  |                     |
| 580 | 566 | 567 | 2  | BACKBONE            |
| 581 | 566 | 578 | am | BACKBONE   INTERRES |
| 582 | 568 | 569 | 1  |                     |
| 583 | 568 | 574 | 1  |                     |
| 584 | 568 | 575 | 1  |                     |
| 585 | 569 | 570 | 2  |                     |
| 586 | 569 | 571 | am |                     |
| 587 | 571 | 576 | 1  |                     |
| 588 | 571 | 577 | 1  |                     |
| 589 | 578 | 579 | 1  | BACKBONE            |
| 590 | 578 | 586 | 1  |                     |



|     |     |     |    |                     |
|-----|-----|-----|----|---------------------|
| 591 | 579 | 580 | 1  | BACKBONE            |
| 592 | 579 | 582 | 1  |                     |
| 593 | 579 | 587 | 1  |                     |
| 594 | 580 | 581 | 2  | BACKBONE            |
| 595 | 580 | 590 | am | BACKBONE   INTERRES |
| 596 | 582 | 583 | 1  |                     |
| 597 | 582 | 588 | 1  |                     |
| 598 | 582 | 589 | 1  |                     |
| 599 | 583 | 584 | ar |                     |
| 600 | 583 | 585 | ar |                     |
| 601 | 590 | 591 | 1  | BACKBONE            |
| 602 | 590 | 598 | 1  |                     |
| 603 | 591 | 592 | 1  | BACKBONE            |
| 604 | 591 | 594 | 1  |                     |
| 605 | 591 | 599 | 1  |                     |
| 606 | 592 | 593 | 2  | BACKBONE            |
| 607 | 592 | 602 | am | BACKBONE   INTERRES |
| 608 | 594 | 595 | 1  |                     |
| 609 | 594 | 600 | 1  |                     |
| 610 | 594 | 601 | 1  |                     |
| 611 | 595 | 596 | ar |                     |
| 612 | 595 | 597 | ar |                     |
| 613 | 602 | 603 | 1  | BACKBONE            |
| 614 | 602 | 609 | 1  |                     |
| 615 | 603 | 604 | 1  | BACKBONE            |
| 616 | 603 | 606 | 1  |                     |
| 617 | 603 | 610 | 1  |                     |
| 618 | 604 | 605 | 2  | BACKBONE            |
| 619 | 604 | 693 | am | BACKBONE   INTERRES |
| 620 | 606 | 607 | 1  |                     |
| 621 | 606 | 608 | 1  |                     |
| 622 | 606 | 611 | 1  |                     |
| 623 | 607 | 612 | 1  |                     |
| 624 | 607 | 613 | 1  |                     |
| 625 | 607 | 614 | 1  |                     |
| 626 | 608 | 615 | 1  |                     |
| 627 | 608 | 616 | 1  |                     |
| 628 | 608 | 617 | 1  |                     |
| 629 | 618 | 619 | 2  | BACKBONE            |
| 630 | 619 | 620 | am | BACKBONE            |
| 631 | 619 | 658 | 1  | BACKBONE            |
| 632 | 620 | 621 | 1  | BACKBONE            |
| 633 | 620 | 655 | 1  | BACKBONE            |
| 634 | 621 | 622 | 1  |                     |
| 635 | 621 | 623 | 1  | BACKBONE            |
| 636 | 621 | 649 | 1  | BACKBONE            |
| 637 | 623 | 624 | am | BACKBONE            |
| 638 | 623 | 648 | 2  | BACKBONE            |
| 639 | 624 | 625 | 1  |                     |
| 640 | 624 | 626 | 1  | BACKBONE            |
| 641 | 626 | 627 | 1  |                     |
| 642 | 626 | 628 | 1  | BACKBONE            |

|     |     |     |    |          |
|-----|-----|-----|----|----------|
| 643 | 626 | 633 | 1  | BACKBONE |
| 644 | 628 | 629 | ar | BACKBONE |
| 645 | 628 | 641 | ar | BACKBONE |
| 646 | 629 | 630 | 1  | BACKBONE |
| 647 | 629 | 636 | ar | BACKBONE |
| 648 | 630 | 631 | 1  |          |
| 649 | 630 | 632 | 1  |          |
| 650 | 630 | 633 | 1  | BACKBONE |
| 651 | 633 | 634 | 1  |          |
| 652 | 633 | 635 | 1  |          |
| 653 | 636 | 637 | ar | BACKBONE |
| 654 | 636 | 643 | 1  | BACKBONE |
| 655 | 637 | 638 | 1  |          |
| 656 | 637 | 639 | ar | BACKBONE |
| 657 | 639 | 640 | 1  |          |
| 658 | 639 | 641 | ar | BACKBONE |
| 659 | 641 | 642 | 1  |          |
| 660 | 643 | 644 | 1  |          |
| 661 | 644 | 645 | 2  |          |
| 662 | 644 | 646 | 2  |          |
| 663 | 644 | 647 | am |          |
| 664 | 647 | 700 | 1  |          |
| 665 | 647 | 701 | 1  |          |
| 666 | 649 | 650 | 1  |          |
| 667 | 649 | 651 | 1  |          |
| 668 | 649 | 652 | 1  | BACKBONE |
| 669 | 652 | 653 | 1  |          |
| 670 | 652 | 654 | 1  |          |
| 671 | 652 | 655 | 1  | BACKBONE |
| 672 | 655 | 656 | 1  |          |
| 673 | 655 | 657 | 1  |          |
| 674 | 658 | 659 | 1  |          |
| 675 | 658 | 660 | 1  | BACKBONE |
| 676 | 658 | 676 | 1  | BACKBONE |
| 677 | 660 | 661 | 1  |          |
| 678 | 660 | 662 | am | BACKBONE |
| 679 | 662 | 663 | 1  | BACKBONE |
| 680 | 662 | 675 | 2  | BACKBONE |
| 681 | 663 | 664 | 1  |          |
| 682 | 663 | 665 | 1  | BACKBONE |
| 683 | 663 | 671 | 1  | BACKBONE |
| 684 | 665 | 666 | 1  |          |
| 685 | 665 | 667 | 1  | BACKBONE |
| 686 | 667 | 668 | 1  |          |
| 687 | 667 | 669 | 1  |          |
| 688 | 667 | 670 | 1  |          |
| 689 | 671 | 672 | 1  |          |
| 690 | 671 | 673 | 1  |          |
| 691 | 671 | 674 | 1  |          |
| 692 | 676 | 677 | 1  |          |
| 693 | 676 | 678 | 1  | BACKBONE |
| 694 | 676 | 690 | 1  | BACKBONE |

|     |     |     |    |                     |
|-----|-----|-----|----|---------------------|
| 695 | 678 | 679 | 1  |                     |
| 696 | 678 | 680 | 1  |                     |
| 697 | 678 | 681 | 1  | BACKBONE            |
| 698 | 681 | 682 | 1  |                     |
| 699 | 681 | 683 | 1  |                     |
| 700 | 681 | 684 | 1  | BACKBONE            |
| 701 | 684 | 685 | 1  |                     |
| 702 | 684 | 686 | 1  |                     |
| 703 | 684 | 687 | 1  | BACKBONE            |
| 704 | 687 | 688 | 1  |                     |
| 705 | 687 | 689 | 1  |                     |
| 706 | 687 | 690 | 1  | BACKBONE            |
| 707 | 690 | 691 | 1  |                     |
| 708 | 690 | 692 | 1  |                     |
| 709 | 693 | 694 | 1  | BACKBONE            |
| 710 | 693 | 702 | 1  |                     |
| 711 | 694 | 695 | 1  | BACKBONE            |
| 712 | 694 | 697 | 1  |                     |
| 713 | 694 | 703 | 1  |                     |
| 714 | 695 | 696 | 2  | BACKBONE            |
| 715 | 695 | 712 | am | BACKBONE   INTERRES |
| 716 | 697 | 698 | 1  |                     |
| 717 | 697 | 704 | 1  |                     |
| 718 | 697 | 705 | 1  |                     |
| 719 | 698 | 699 | 1  |                     |
| 720 | 698 | 706 | 1  |                     |
| 721 | 698 | 707 | 1  |                     |
| 722 | 699 | 700 | 1  |                     |
| 723 | 699 | 708 | 1  |                     |
| 724 | 699 | 709 | 1  |                     |
| 725 | 700 | 710 | 1  |                     |
| 726 | 700 | 711 | 1  |                     |
| 727 | 712 | 713 | 1  | BACKBONE            |
| 728 | 712 | 718 | 1  |                     |
| 729 | 713 | 714 | 1  | BACKBONE            |
| 730 | 713 | 716 | 1  |                     |
| 731 | 713 | 719 | 1  |                     |
| 732 | 714 | 715 | 2  | BACKBONE            |
| 733 | 714 | 724 | am | BACKBONE   INTERRES |
| 734 | 716 | 717 | 1  |                     |
| 735 | 716 | 720 | 1  |                     |
| 736 | 716 | 721 | 1  |                     |
| 737 | 717 | 722 | 1  |                     |
| 738 | 717 | 723 | 1  |                     |
| 739 | 724 | 725 | 1  | BACKBONE            |
| 740 | 724 | 735 | 1  |                     |
| 741 | 725 | 726 | 1  | BACKBONE            |
| 742 | 725 | 728 | 1  |                     |
| 743 | 725 | 736 | 1  |                     |
| 744 | 726 | 727 | 2  | BACKBONE            |
| 745 | 726 | 744 | am | BACKBONE   INTERRES |
| 746 | 728 | 729 | 1  |                     |

|     |     |     |    |                     |
|-----|-----|-----|----|---------------------|
| 747 | 728 | 737 | 1  |                     |
| 748 | 728 | 738 | 1  |                     |
| 749 | 729 | 730 | ar |                     |
| 750 | 729 | 731 | ar |                     |
| 751 | 730 | 732 | ar |                     |
| 752 | 730 | 739 | 1  |                     |
| 753 | 731 | 733 | ar |                     |
| 754 | 731 | 740 | 1  |                     |
| 755 | 732 | 734 | ar |                     |
| 756 | 732 | 741 | 1  |                     |
| 757 | 733 | 734 | ar |                     |
| 758 | 733 | 742 | 1  |                     |
| 759 | 734 | 743 | 1  |                     |
| 760 | 744 | 745 | 1  | BACKBONE            |
| 761 | 744 | 750 | 1  |                     |
| 762 | 745 | 746 | 1  | BACKBONE            |
| 763 | 745 | 748 | 1  |                     |
| 764 | 745 | 751 | 1  |                     |
| 765 | 746 | 747 | 2  | BACKBONE            |
| 766 | 746 | 755 | am | BACKBONE   INTERRES |
| 767 | 748 | 749 | 1  |                     |
| 768 | 748 | 752 | 1  |                     |
| 769 | 748 | 753 | 1  |                     |
| 770 | 749 | 754 | 1  |                     |
| 771 | 755 | 756 | 1  | BACKBONE            |
| 772 | 755 | 761 | 1  |                     |
| 773 | 756 | 757 | 1  | BACKBONE            |
| 774 | 756 | 759 | 1  |                     |
| 775 | 756 | 762 | 1  |                     |
| 776 | 757 | 758 | 2  | BACKBONE            |
| 777 | 757 | 767 | am | BACKBONE   INTERRES |
| 778 | 759 | 760 | 1  |                     |
| 779 | 759 | 763 | 1  |                     |
| 780 | 759 | 764 | 1  |                     |
| 781 | 760 | 765 | 1  |                     |
| 782 | 760 | 766 | 1  |                     |
| 783 | 767 | 768 | 1  | BACKBONE            |
| 784 | 767 | 775 | 1  |                     |
| 785 | 768 | 769 | 1  | BACKBONE            |
| 786 | 768 | 771 | 1  |                     |
| 787 | 768 | 776 | 1  |                     |
| 788 | 769 | 770 | 2  | BACKBONE            |
| 789 | 769 | 779 | am | BACKBONE   INTERRES |
| 790 | 771 | 772 | 1  |                     |
| 791 | 771 | 777 | 1  |                     |
| 792 | 771 | 778 | 1  |                     |
| 793 | 772 | 773 | ar |                     |
| 794 | 772 | 774 | ar |                     |
| 795 | 779 | 780 | 1  | BACKBONE            |
| 796 | 779 | 783 | 1  |                     |
| 797 | 780 | 781 | 1  | BACKBONE            |
| 798 | 780 | 784 | 1  |                     |

|     |     |     |    |                     |
|-----|-----|-----|----|---------------------|
| 799 | 780 | 785 | 1  |                     |
| 800 | 781 | 782 | 2  | BACKBONE            |
| 801 | 781 | 786 | am | BACKBONE   INTERRES |
| 802 | 786 | 787 | 1  | BACKBONE            |
| 803 | 786 | 790 | 1  |                     |
| 804 | 787 | 788 | 1  | BACKBONE            |
| 805 | 787 | 791 | 1  |                     |
| 806 | 787 | 792 | 1  |                     |
| 807 | 788 | 789 | 2  | BACKBONE            |
| 808 | 788 | 793 | am | BACKBONE   INTERRES |
| 809 | 793 | 794 | 1  | BACKBONE            |
| 810 | 793 | 801 | 1  |                     |
| 811 | 794 | 795 | 1  | BACKBONE            |
| 812 | 794 | 797 | 1  |                     |
| 813 | 794 | 802 | 1  |                     |
| 814 | 795 | 796 | 2  | BACKBONE            |
| 815 | 795 | 812 | am | BACKBONE   INTERRES |
| 816 | 797 | 798 | 1  |                     |
| 817 | 797 | 803 | 1  |                     |
| 818 | 797 | 804 | 1  |                     |
| 819 | 798 | 799 | 1  |                     |
| 820 | 798 | 800 | 1  |                     |
| 821 | 798 | 805 | 1  |                     |
| 822 | 799 | 806 | 1  |                     |
| 823 | 799 | 807 | 1  |                     |
| 824 | 799 | 808 | 1  |                     |
| 825 | 800 | 809 | 1  |                     |
| 826 | 800 | 810 | 1  |                     |
| 827 | 800 | 811 | 1  |                     |
| 828 | 812 | 813 | 1  | BACKBONE            |
| 829 | 812 | 823 | 1  |                     |
| 830 | 813 | 814 | 1  | BACKBONE            |
| 831 | 813 | 816 | 1  |                     |
| 832 | 813 | 824 | 1  |                     |
| 833 | 814 | 815 | 2  | BACKBONE            |
| 834 | 814 | 836 | am | BACKBONE   INTERRES |
| 835 | 816 | 817 | 1  |                     |
| 836 | 816 | 825 | 1  |                     |
| 837 | 816 | 826 | 1  |                     |
| 838 | 817 | 818 | 1  |                     |
| 839 | 817 | 827 | 1  |                     |
| 840 | 817 | 828 | 1  |                     |
| 841 | 818 | 819 | 1  |                     |
| 842 | 818 | 829 | 1  |                     |
| 843 | 818 | 830 | 1  |                     |
| 844 | 819 | 820 | ar |                     |
| 845 | 819 | 831 | 1  |                     |
| 846 | 820 | 821 | ar |                     |
| 847 | 820 | 822 | ar |                     |
| 848 | 821 | 832 | 1  |                     |
| 849 | 821 | 833 | 1  |                     |
| 850 | 822 | 834 | 1  |                     |

|     |     |     |    |                     |
|-----|-----|-----|----|---------------------|
| 851 | 822 | 835 | 1  |                     |
| 852 | 836 | 837 | 1  | BACKBONE            |
| 853 | 836 | 842 | 1  |                     |
| 854 | 837 | 838 | 1  | BACKBONE            |
| 855 | 837 | 840 | 1  |                     |
| 856 | 837 | 843 | 1  |                     |
| 857 | 838 | 839 | 2  | BACKBONE            |
| 858 | 838 | 849 | am | BACKBONE   INTERRES |
| 859 | 840 | 841 | 1  |                     |
| 860 | 840 | 844 | 1  |                     |
| 861 | 840 | 845 | 1  |                     |
| 862 | 841 | 846 | 1  |                     |
| 863 | 841 | 847 | 1  |                     |
| 864 | 841 | 848 | 1  |                     |
| 865 | 849 | 850 | 1  | BACKBONE            |
| 866 | 849 | 863 | 1  |                     |
| 867 | 850 | 851 | 1  | BACKBONE            |
| 868 | 850 | 853 | 1  |                     |
| 869 | 850 | 864 | 1  |                     |
| 870 | 851 | 852 | 2  | BACKBONE            |
| 871 | 851 | 873 | am | BACKBONE   INTERRES |
| 872 | 853 | 854 | 1  |                     |
| 873 | 853 | 865 | 1  |                     |
| 874 | 853 | 866 | 1  |                     |
| 875 | 854 | 855 | 2  |                     |
| 876 | 854 | 856 | 1  |                     |
| 877 | 855 | 857 | 1  |                     |
| 878 | 855 | 867 | 1  |                     |
| 879 | 856 | 858 | ar |                     |
| 880 | 856 | 859 | ar |                     |
| 881 | 857 | 858 | 1  |                     |
| 882 | 857 | 868 | 1  |                     |
| 883 | 858 | 860 | ar |                     |
| 884 | 859 | 861 | ar |                     |
| 885 | 859 | 869 | 1  |                     |
| 886 | 860 | 862 | ar |                     |
| 887 | 860 | 870 | 1  |                     |
| 888 | 861 | 862 | ar |                     |
| 889 | 861 | 871 | 1  |                     |
| 890 | 862 | 872 | 1  |                     |
| 891 | 873 | 874 | 1  | BACKBONE            |
| 892 | 873 | 882 | 1  |                     |
| 893 | 874 | 875 | 1  | BACKBONE            |
| 894 | 874 | 877 | 1  |                     |
| 895 | 874 | 883 | 1  |                     |
| 896 | 875 | 876 | 2  | BACKBONE            |
| 897 | 875 | 888 | am | BACKBONE   INTERRES |
| 898 | 877 | 878 | 1  |                     |
| 899 | 877 | 884 | 1  |                     |
| 900 | 877 | 885 | 1  |                     |
| 901 | 878 | 879 | 1  |                     |
| 902 | 878 | 886 | 1  |                     |

|     |     |     |    |                     |
|-----|-----|-----|----|---------------------|
| 903 | 878 | 887 | 1  |                     |
| 904 | 879 | 880 | ar |                     |
| 905 | 879 | 881 | ar |                     |
| 906 | 888 | 889 | 1  | BACKBONE            |
| 907 | 888 | 894 | 1  |                     |
| 908 | 889 | 890 | 1  | BACKBONE            |
| 909 | 889 | 892 | 1  |                     |
| 910 | 889 | 895 | 1  |                     |
| 911 | 890 | 891 | 2  | BACKBONE            |
| 912 | 890 | 899 | am | BACKBONE   INTERRES |
| 913 | 892 | 893 | 1  |                     |
| 914 | 892 | 896 | 1  |                     |
| 915 | 892 | 897 | 1  |                     |
| 916 | 893 | 898 | 1  |                     |
| 917 | 899 | 900 | 1  | BACKBONE            |
| 918 | 899 | 903 | 1  |                     |
| 919 | 900 | 901 | 1  | BACKBONE            |
| 920 | 900 | 904 | 1  |                     |
| 921 | 900 | 905 | 1  |                     |
| 922 | 901 | 902 | 2  | BACKBONE            |
| 923 | 901 | 906 | am | BACKBONE   INTERRES |
| 924 | 906 | 907 | 1  | BACKBONE            |
| 925 | 906 | 914 | 1  |                     |
| 926 | 907 | 908 | 1  | BACKBONE            |
| 927 | 907 | 910 | 1  |                     |
| 928 | 907 | 915 | 1  |                     |
| 929 | 908 | 909 | 2  | BACKBONE            |
| 930 | 908 | 918 | am | BACKBONE   INTERRES |
| 931 | 910 | 911 | 1  |                     |
| 932 | 910 | 916 | 1  |                     |
| 933 | 910 | 917 | 1  |                     |
| 934 | 911 | 912 | ar |                     |
| 935 | 911 | 913 | ar |                     |
| 936 | 918 | 919 | 1  | BACKBONE            |
| 937 | 918 | 926 | 1  |                     |
| 938 | 919 | 920 | 1  | BACKBONE            |
| 939 | 919 | 922 | 1  |                     |
| 940 | 919 | 927 | 1  |                     |
| 941 | 920 | 921 | 2  | BACKBONE            |
| 942 | 920 | 930 | am | BACKBONE   INTERRES |
| 943 | 922 | 923 | 1  |                     |
| 944 | 922 | 928 | 1  |                     |
| 945 | 922 | 929 | 1  |                     |
| 946 | 923 | 924 | ar |                     |
| 947 | 923 | 925 | ar |                     |
| 948 | 930 | 931 | 1  | BACKBONE            |
| 949 | 930 | 936 | 1  |                     |
| 950 | 931 | 932 | 1  | BACKBONE            |
| 951 | 931 | 934 | 1  |                     |
| 952 | 931 | 937 | 1  |                     |
| 953 | 932 | 933 | 2  | BACKBONE            |
| 954 | 932 | 944 | am | BACKBONE   INTERRES |

|      |     |     |    |                     |
|------|-----|-----|----|---------------------|
| 955  | 934 | 935 | 1  |                     |
| 956  | 934 | 938 | 1  |                     |
| 957  | 934 | 939 | 1  |                     |
| 958  | 935 | 936 | 1  |                     |
| 959  | 935 | 940 | 1  |                     |
| 960  | 935 | 941 | 1  |                     |
| 961  | 936 | 942 | 1  |                     |
| 962  | 936 | 943 | 1  |                     |
| 963  | 944 | 945 | 1  | BACKBONE            |
| 964  | 944 | 958 | 1  |                     |
| 965  | 945 | 946 | 1  | BACKBONE            |
| 966  | 945 | 948 | 1  |                     |
| 967  | 945 | 959 | 1  |                     |
| 968  | 946 | 947 | 2  | BACKBONE            |
| 969  | 946 | 968 | am | BACKBONE   INTERRES |
| 970  | 948 | 949 | 1  |                     |
| 971  | 948 | 960 | 1  |                     |
| 972  | 948 | 961 | 1  |                     |
| 973  | 949 | 950 | 2  |                     |
| 974  | 949 | 951 | 1  |                     |
| 975  | 950 | 952 | 1  |                     |
| 976  | 950 | 962 | 1  |                     |
| 977  | 951 | 953 | ar |                     |
| 978  | 951 | 954 | ar |                     |
| 979  | 952 | 953 | 1  |                     |
| 980  | 952 | 963 | 1  |                     |
| 981  | 953 | 955 | ar |                     |
| 982  | 954 | 956 | ar |                     |
| 983  | 954 | 964 | 1  |                     |
| 984  | 955 | 957 | ar |                     |
| 985  | 955 | 965 | 1  |                     |
| 986  | 956 | 957 | ar |                     |
| 987  | 956 | 966 | 1  |                     |
| 988  | 957 | 967 | 1  |                     |
| 989  | 968 | 969 | 1  | BACKBONE            |
| 990  | 968 | 975 | 1  |                     |
| 991  | 969 | 970 | 1  | BACKBONE            |
| 992  | 969 | 972 | 1  |                     |
| 993  | 969 | 976 | 1  |                     |
| 994  | 970 | 971 | 2  | BACKBONE            |
| 995  | 970 | 984 | am | BACKBONE   INTERRES |
| 996  | 972 | 973 | 1  |                     |
| 997  | 972 | 974 | 1  |                     |
| 998  | 972 | 977 | 1  |                     |
| 999  | 973 | 978 | 1  |                     |
| 1000 | 973 | 979 | 1  |                     |
| 1001 | 973 | 980 | 1  |                     |
| 1002 | 974 | 981 | 1  |                     |
| 1003 | 974 | 982 | 1  |                     |
| 1004 | 974 | 983 | 1  |                     |
| 1005 | 984 | 985 | 1  | BACKBONE            |
| 1006 | 984 | 993 | 1  |                     |



|      |      |      |    |                     |
|------|------|------|----|---------------------|
| 1007 | 985  | 986  | 1  | BACKBONE            |
| 1008 | 985  | 988  | 1  |                     |
| 1009 | 985  | 994  | 1  |                     |
| 1010 | 986  | 987  | 2  | BACKBONE            |
| 1011 | 986  | 999  | am | BACKBONE   INTERRES |
| 1012 | 988  | 989  | 1  |                     |
| 1013 | 988  | 995  | 1  |                     |
| 1014 | 988  | 996  | 1  |                     |
| 1015 | 989  | 990  | 1  |                     |
| 1016 | 989  | 997  | 1  |                     |
| 1017 | 989  | 998  | 1  |                     |
| 1018 | 990  | 991  | ar |                     |
| 1019 | 990  | 992  | ar |                     |
| 1020 | 999  | 1000 | 1  | BACKBONE            |
| 1021 | 999  | 1009 | 1  |                     |
| 1022 | 1000 | 1001 | 1  | BACKBONE            |
| 1023 | 1000 | 1003 | 1  |                     |
| 1024 | 1000 | 1010 | 1  |                     |
| 1025 | 1001 | 1002 | 2  | BACKBONE            |
| 1026 | 1001 | 1016 | am | BACKBONE   INTERRES |
| 1027 | 1003 | 1004 | 1  |                     |
| 1028 | 1003 | 1011 | 1  |                     |
| 1029 | 1003 | 1012 | 1  |                     |
| 1030 | 1004 | 1005 | 1  |                     |
| 1031 | 1004 | 1006 | 2  |                     |
| 1032 | 1005 | 1007 | ar |                     |
| 1033 | 1005 | 1013 | 1  |                     |
| 1034 | 1006 | 1008 | 1  |                     |
| 1035 | 1006 | 1014 | 1  |                     |
| 1036 | 1007 | 1008 | 1  |                     |
| 1037 | 1007 | 1015 | 1  |                     |
| 1038 | 1016 | 1017 | 1  | BACKBONE            |
| 1039 | 1016 | 1021 | 1  |                     |
| 1040 | 1017 | 1018 | 1  | BACKBONE            |
| 1041 | 1017 | 1020 | 1  |                     |
| 1042 | 1017 | 1022 | 1  |                     |
| 1043 | 1018 | 1019 | 2  | BACKBONE            |
| 1044 | 1018 | 1026 | am | BACKBONE   INTERRES |
| 1045 | 1020 | 1023 | 1  |                     |
| 1046 | 1020 | 1024 | 1  |                     |
| 1047 | 1020 | 1025 | 1  |                     |
| 1048 | 1026 | 1027 | 1  | BACKBONE            |
| 1049 | 1026 | 1035 | 1  |                     |
| 1050 | 1027 | 1028 | 1  | BACKBONE            |
| 1051 | 1027 | 1030 | 1  |                     |
| 1052 | 1027 | 1036 | 1  |                     |
| 1053 | 1028 | 1029 | 2  | BACKBONE            |
| 1054 | 1028 | 1048 | am | BACKBONE   INTERRES |
| 1055 | 1030 | 1031 | 1  |                     |
| 1056 | 1030 | 1037 | 1  |                     |
| 1057 | 1030 | 1038 | 1  |                     |
| 1058 | 1031 | 1032 | 1  |                     |

|      |      |      |    |                     |
|------|------|------|----|---------------------|
| 1059 | 1031 | 1039 | 1  |                     |
| 1060 | 1031 | 1040 | 1  |                     |
| 1061 | 1032 | 1033 | 1  |                     |
| 1062 | 1032 | 1041 | 1  |                     |
| 1063 | 1032 | 1042 | 1  |                     |
| 1064 | 1033 | 1034 | 1  |                     |
| 1065 | 1033 | 1043 | 1  |                     |
| 1066 | 1033 | 1044 | 1  |                     |
| 1067 | 1034 | 1045 | 1  |                     |
| 1068 | 1034 | 1046 | 1  |                     |
| 1069 | 1034 | 1047 | 1  |                     |
| 1070 | 1048 | 1049 | 1  | BACKBONE            |
| 1071 | 1048 | 1062 | 1  |                     |
| 1072 | 1049 | 1050 | 1  | BACKBONE            |
| 1073 | 1049 | 1052 | 1  |                     |
| 1074 | 1049 | 1063 | 1  |                     |
| 1075 | 1050 | 1051 | 2  | BACKBONE            |
| 1076 | 1050 | 1072 | am | BACKBONE   INTERRES |
| 1077 | 1052 | 1053 | 1  |                     |
| 1078 | 1052 | 1064 | 1  |                     |
| 1079 | 1052 | 1065 | 1  |                     |
| 1080 | 1053 | 1054 | 2  |                     |
| 1081 | 1053 | 1055 | 1  |                     |
| 1082 | 1054 | 1056 | 1  |                     |
| 1083 | 1054 | 1066 | 1  |                     |
| 1084 | 1055 | 1057 | ar |                     |
| 1085 | 1055 | 1058 | ar |                     |
| 1086 | 1056 | 1057 | 1  |                     |
| 1087 | 1056 | 1067 | 1  |                     |
| 1088 | 1057 | 1059 | ar |                     |
| 1089 | 1058 | 1060 | ar |                     |
| 1090 | 1058 | 1068 | 1  |                     |
| 1091 | 1059 | 1061 | ar |                     |
| 1092 | 1059 | 1069 | 1  |                     |
| 1093 | 1060 | 1061 | ar |                     |
| 1094 | 1060 | 1070 | 1  |                     |
| 1095 | 1061 | 1071 | 1  |                     |
| 1096 | 1072 | 1073 | 1  | BACKBONE            |
| 1097 | 1072 | 1083 | 1  |                     |
| 1098 | 1073 | 1074 | 1  | BACKBONE            |
| 1099 | 1073 | 1076 | 1  |                     |
| 1100 | 1073 | 1084 | 1  |                     |
| 1101 | 1074 | 1075 | 2  | BACKBONE            |
| 1102 | 1074 | 1092 | am | BACKBONE   INTERRES |
| 1103 | 1076 | 1077 | 1  |                     |
| 1104 | 1076 | 1085 | 1  |                     |
| 1105 | 1076 | 1086 | 1  |                     |
| 1106 | 1077 | 1078 | ar |                     |
| 1107 | 1077 | 1079 | ar |                     |
| 1108 | 1078 | 1080 | ar |                     |
| 1109 | 1078 | 1087 | 1  |                     |
| 1110 | 1079 | 1081 | ar |                     |

|      |      |      |    |                     |
|------|------|------|----|---------------------|
| 1111 | 1079 | 1088 | 1  |                     |
| 1112 | 1080 | 1082 | ar |                     |
| 1113 | 1080 | 1089 | 1  |                     |
| 1114 | 1081 | 1082 | ar |                     |
| 1115 | 1081 | 1090 | 1  |                     |
| 1116 | 1082 | 1091 | 1  |                     |
| 1117 | 1092 | 1093 | 1  | BACKBONE            |
| 1118 | 1092 | 1098 | 1  |                     |
| 1119 | 1093 | 1094 | 1  | BACKBONE            |
| 1120 | 1093 | 1096 | 1  |                     |
| 1121 | 1093 | 1099 | 1  |                     |
| 1122 | 1094 | 1095 | 2  | BACKBONE            |
| 1123 | 1094 | 1106 | am | BACKBONE   INTERRES |
| 1124 | 1096 | 1097 | 1  |                     |
| 1125 | 1096 | 1100 | 1  |                     |
| 1126 | 1096 | 1101 | 1  |                     |
| 1127 | 1097 | 1098 | 1  |                     |
| 1128 | 1097 | 1102 | 1  |                     |
| 1129 | 1097 | 1103 | 1  |                     |
| 1130 | 1098 | 1104 | 1  |                     |
| 1131 | 1098 | 1105 | 1  |                     |
| 1132 | 1106 | 1107 | 1  | BACKBONE            |
| 1133 | 1106 | 1110 | 1  |                     |
| 1134 | 1107 | 1108 | 1  | BACKBONE            |
| 1135 | 1107 | 1111 | 1  |                     |
| 1136 | 1107 | 1112 | 1  |                     |
| 1137 | 1108 | 1109 | 2  | BACKBONE            |
| 1138 | 1108 | 1113 | am | BACKBONE   INTERRES |
| 1139 | 1113 | 1114 | 1  | BACKBONE            |
| 1140 | 1113 | 1119 | 1  |                     |
| 1141 | 1114 | 1115 | 1  | BACKBONE            |
| 1142 | 1114 | 1117 | 1  |                     |
| 1143 | 1114 | 1120 | 1  |                     |
| 1144 | 1115 | 1116 | 2  | BACKBONE            |
| 1145 | 1115 | 1125 | am | BACKBONE   INTERRES |
| 1146 | 1117 | 1118 | 1  |                     |
| 1147 | 1117 | 1121 | 1  |                     |
| 1148 | 1117 | 1122 | 1  |                     |
| 1149 | 1118 | 1123 | 1  |                     |
| 1150 | 1118 | 1124 | 1  |                     |
| 1151 | 1125 | 1126 | 1  | BACKBONE            |
| 1152 | 1125 | 1134 | 1  |                     |
| 1153 | 1126 | 1127 | 1  | BACKBONE            |
| 1154 | 1126 | 1129 | 1  |                     |
| 1155 | 1126 | 1135 | 1  |                     |
| 1156 | 1127 | 1128 | 2  | BACKBONE            |
| 1157 | 1127 | 1140 | am | BACKBONE   INTERRES |
| 1158 | 1129 | 1130 | 1  |                     |
| 1159 | 1129 | 1136 | 1  |                     |
| 1160 | 1129 | 1137 | 1  |                     |
| 1161 | 1130 | 1131 | 1  |                     |
| 1162 | 1130 | 1138 | 1  |                     |

|      |      |      |    |                     |
|------|------|------|----|---------------------|
| 1163 | 1130 | 1139 | 1  |                     |
| 1164 | 1131 | 1132 | ar |                     |
| 1165 | 1131 | 1133 | ar |                     |
| 1166 | 1140 | 1141 | 1  | BACKBONE            |
| 1167 | 1140 | 1151 | 1  |                     |
| 1168 | 1141 | 1142 | 1  | BACKBONE            |
| 1169 | 1141 | 1144 | 1  |                     |
| 1170 | 1141 | 1152 | 1  |                     |
| 1171 | 1142 | 1143 | 2  | BACKBONE            |
| 1172 | 1142 | 1160 | am | BACKBONE   INTERRES |
| 1173 | 1144 | 1145 | 1  |                     |
| 1174 | 1144 | 1153 | 1  |                     |
| 1175 | 1144 | 1154 | 1  |                     |
| 1176 | 1145 | 1146 | ar |                     |
| 1177 | 1145 | 1147 | ar |                     |
| 1178 | 1146 | 1148 | ar |                     |
| 1179 | 1146 | 1155 | 1  |                     |
| 1180 | 1147 | 1149 | ar |                     |
| 1181 | 1147 | 1156 | 1  |                     |
| 1182 | 1148 | 1150 | ar |                     |
| 1183 | 1148 | 1157 | 1  |                     |
| 1184 | 1149 | 1150 | ar |                     |
| 1185 | 1149 | 1158 | 1  |                     |
| 1186 | 1150 | 1159 | 1  |                     |
| 1187 | 1160 | 1161 | 1  | BACKBONE            |
| 1188 | 1160 | 1168 | 1  |                     |
| 1189 | 1161 | 1162 | 1  | BACKBONE            |
| 1190 | 1161 | 1164 | 1  |                     |
| 1191 | 1161 | 1169 | 1  |                     |
| 1192 | 1162 | 1163 | 2  | BACKBONE            |
| 1193 | 1162 | 1179 | am | BACKBONE   INTERRES |
| 1194 | 1164 | 1165 | 1  |                     |
| 1195 | 1164 | 1170 | 1  |                     |
| 1196 | 1164 | 1171 | 1  |                     |
| 1197 | 1165 | 1166 | 1  |                     |
| 1198 | 1165 | 1167 | 1  |                     |
| 1199 | 1165 | 1172 | 1  |                     |
| 1200 | 1166 | 1173 | 1  |                     |
| 1201 | 1166 | 1174 | 1  |                     |
| 1202 | 1166 | 1175 | 1  |                     |
| 1203 | 1167 | 1176 | 1  |                     |
| 1204 | 1167 | 1177 | 1  |                     |
| 1205 | 1167 | 1178 | 1  |                     |
| 1206 | 1179 | 1180 | 1  | BACKBONE            |
| 1207 | 1179 | 1187 | 1  |                     |
| 1208 | 1180 | 1181 | 1  | BACKBONE            |
| 1209 | 1180 | 1183 | 1  |                     |
| 1210 | 1180 | 1188 | 1  |                     |
| 1211 | 1181 | 1182 | 2  | BACKBONE            |
| 1212 | 1181 | 1198 | am | BACKBONE   INTERRES |
| 1213 | 1183 | 1184 | 1  |                     |
| 1214 | 1183 | 1185 | 1  |                     |

|      |      |      |    |                     |
|------|------|------|----|---------------------|
| 1215 | 1183 | 1189 | 1  |                     |
| 1216 | 1184 | 1186 | 1  |                     |
| 1217 | 1184 | 1190 | 1  |                     |
| 1218 | 1184 | 1191 | 1  |                     |
| 1219 | 1185 | 1192 | 1  |                     |
| 1220 | 1185 | 1193 | 1  |                     |
| 1221 | 1185 | 1194 | 1  |                     |
| 1222 | 1186 | 1195 | 1  |                     |
| 1223 | 1186 | 1196 | 1  |                     |
| 1224 | 1186 | 1197 | 1  |                     |
| 1225 | 1198 | 1199 | 1  | BACKBONE            |
| 1226 | 1198 | 1209 | 1  |                     |
| 1227 | 1199 | 1200 | 1  | BACKBONE            |
| 1228 | 1199 | 1202 | 1  |                     |
| 1229 | 1199 | 1210 | 1  |                     |
| 1230 | 1200 | 1201 | 2  | BACKBONE            |
| 1231 | 1200 | 1222 | am | BACKBONE   INTERRES |
| 1232 | 1202 | 1203 | 1  |                     |
| 1233 | 1202 | 1211 | 1  |                     |
| 1234 | 1202 | 1212 | 1  |                     |
| 1235 | 1203 | 1204 | 1  |                     |
| 1236 | 1203 | 1213 | 1  |                     |
| 1237 | 1203 | 1214 | 1  |                     |
| 1238 | 1204 | 1205 | 1  |                     |
| 1239 | 1204 | 1215 | 1  |                     |
| 1240 | 1204 | 1216 | 1  |                     |
| 1241 | 1205 | 1206 | ar |                     |
| 1242 | 1205 | 1217 | 1  |                     |
| 1243 | 1206 | 1207 | ar |                     |
| 1244 | 1206 | 1208 | ar |                     |
| 1245 | 1207 | 1218 | 1  |                     |
| 1246 | 1207 | 1219 | 1  |                     |
| 1247 | 1208 | 1220 | 1  |                     |
| 1248 | 1208 | 1221 | 1  |                     |
| 1249 | 1222 | 1223 | 1  | BACKBONE            |
| 1250 | 1222 | 1230 | 1  |                     |
| 1251 | 1223 | 1224 | 1  | BACKBONE            |
| 1252 | 1223 | 1226 | 1  |                     |
| 1253 | 1223 | 1231 | 1  |                     |
| 1254 | 1224 | 1225 | 2  | BACKBONE            |
| 1255 | 1224 | 1241 | am | BACKBONE   INTERRES |
| 1256 | 1226 | 1227 | 1  |                     |
| 1257 | 1226 | 1232 | 1  |                     |
| 1258 | 1226 | 1233 | 1  |                     |
| 1259 | 1227 | 1228 | 1  |                     |
| 1260 | 1227 | 1234 | 1  |                     |
| 1261 | 1227 | 1235 | 1  |                     |
| 1262 | 1228 | 1229 | 1  |                     |
| 1263 | 1228 | 1236 | 1  |                     |
| 1264 | 1228 | 1237 | 1  |                     |
| 1265 | 1229 | 1238 | 1  |                     |
| 1266 | 1229 | 1239 | 1  |                     |

|      |      |      |    |                     |
|------|------|------|----|---------------------|
| 1267 | 1229 | 1240 | 1  |                     |
| 1268 | 1241 | 1242 | 1  | BACKBONE            |
| 1269 | 1241 | 1250 | 1  |                     |
| 1270 | 1242 | 1243 | 1  | BACKBONE            |
| 1271 | 1242 | 1245 | 1  |                     |
| 1272 | 1242 | 1251 | 1  |                     |
| 1273 | 1243 | 1244 | 2  | BACKBONE            |
| 1274 | 1243 | 1263 | am | BACKBONE   INTERRES |
| 1275 | 1245 | 1246 | 1  |                     |
| 1276 | 1245 | 1252 | 1  |                     |
| 1277 | 1245 | 1253 | 1  |                     |
| 1278 | 1246 | 1247 | 1  |                     |
| 1279 | 1246 | 1254 | 1  |                     |
| 1280 | 1246 | 1255 | 1  |                     |
| 1281 | 1247 | 1248 | 1  |                     |
| 1282 | 1247 | 1256 | 1  |                     |
| 1283 | 1247 | 1257 | 1  |                     |
| 1284 | 1248 | 1249 | 1  |                     |
| 1285 | 1248 | 1258 | 1  |                     |
| 1286 | 1248 | 1259 | 1  |                     |
| 1287 | 1249 | 1260 | 1  |                     |
| 1288 | 1249 | 1261 | 1  |                     |
| 1289 | 1249 | 1262 | 1  |                     |
| 1290 | 1263 | 1264 | 1  | BACKBONE            |
| 1291 | 1263 | 1267 | 1  |                     |
| 1292 | 1264 | 1265 | 1  | BACKBONE            |
| 1293 | 1264 | 1268 | 1  |                     |
| 1294 | 1264 | 1269 | 1  |                     |
| 1295 | 1265 | 1266 | 2  | BACKBONE            |
| 1296 | 1265 | 1270 | am | BACKBONE   INTERRES |
| 1297 | 1270 | 1271 | 1  | BACKBONE            |
| 1298 | 1270 | 1279 | 1  |                     |
| 1299 | 1271 | 1272 | 1  | BACKBONE            |
| 1300 | 1271 | 1274 | 1  |                     |
| 1301 | 1271 | 1280 | 1  |                     |
| 1302 | 1272 | 1273 | 2  | BACKBONE            |
| 1303 | 1272 | 1287 | am | BACKBONE   INTERRES |
| 1304 | 1274 | 1275 | 1  |                     |
| 1305 | 1274 | 1281 | 1  |                     |
| 1306 | 1274 | 1282 | 1  |                     |
| 1307 | 1275 | 1276 | 1  |                     |
| 1308 | 1275 | 1283 | 1  |                     |
| 1309 | 1275 | 1284 | 1  |                     |
| 1310 | 1276 | 1277 | 2  |                     |
| 1311 | 1276 | 1278 | am |                     |
| 1312 | 1278 | 1285 | 1  |                     |
| 1313 | 1278 | 1286 | 1  |                     |
| 1314 | 1287 | 1288 | 1  | BACKBONE            |
| 1315 | 1287 | 1296 | 1  |                     |
| 1316 | 1288 | 1289 | 1  | BACKBONE            |
| 1317 | 1288 | 1291 | 1  |                     |
| 1318 | 1288 | 1297 | 1  |                     |

|      |      |      |    |                     |
|------|------|------|----|---------------------|
| 1319 | 1289 | 1290 | 2  | BACKBONE            |
| 1320 | 1289 | 1302 | am | BACKBONE   INTERRES |
| 1321 | 1291 | 1292 | 1  |                     |
| 1322 | 1291 | 1298 | 1  |                     |
| 1323 | 1291 | 1299 | 1  |                     |
| 1324 | 1292 | 1293 | 1  |                     |
| 1325 | 1292 | 1300 | 1  |                     |
| 1326 | 1292 | 1301 | 1  |                     |
| 1327 | 1293 | 1294 | ar |                     |
| 1328 | 1293 | 1295 | ar |                     |
| 1329 | 1302 | 1303 | 1  | BACKBONE            |
| 1330 | 1302 | 1314 | 1  |                     |
| 1331 | 1303 | 1304 | 1  | BACKBONE            |
| 1332 | 1303 | 1306 | 1  |                     |
| 1333 | 1303 | 1315 | 1  |                     |
| 1334 | 1304 | 1305 | 2  | BACKBONE            |
| 1335 | 1304 | 1323 | am | BACKBONE   INTERRES |
| 1336 | 1306 | 1307 | 1  |                     |
| 1337 | 1306 | 1316 | 1  |                     |
| 1338 | 1306 | 1317 | 1  |                     |
| 1339 | 1307 | 1308 | ar |                     |
| 1340 | 1307 | 1309 | ar |                     |
| 1341 | 1308 | 1310 | ar |                     |
| 1342 | 1308 | 1318 | 1  |                     |
| 1343 | 1309 | 1311 | ar |                     |
| 1344 | 1309 | 1319 | 1  |                     |
| 1345 | 1310 | 1312 | ar |                     |
| 1346 | 1310 | 1320 | 1  |                     |
| 1347 | 1311 | 1312 | ar |                     |
| 1348 | 1311 | 1321 | 1  |                     |
| 1349 | 1312 | 1313 | 1  |                     |
| 1350 | 1313 | 1322 | 1  |                     |
| 1351 | 1323 | 1324 | 1  | BACKBONE            |
| 1352 | 1323 | 1331 | 1  |                     |
| 1353 | 1324 | 1325 | 1  | BACKBONE            |
| 1354 | 1324 | 1327 | 1  |                     |
| 1355 | 1324 | 1332 | 1  |                     |
| 1356 | 1325 | 1326 | 2  | BACKBONE            |
| 1357 | 1325 | 1342 | am | BACKBONE   INTERRES |
| 1358 | 1327 | 1328 | 1  |                     |
| 1359 | 1327 | 1329 | 1  |                     |
| 1360 | 1327 | 1333 | 1  |                     |
| 1361 | 1328 | 1330 | 1  |                     |
| 1362 | 1328 | 1334 | 1  |                     |
| 1363 | 1328 | 1335 | 1  |                     |
| 1364 | 1329 | 1336 | 1  |                     |
| 1365 | 1329 | 1337 | 1  |                     |
| 1366 | 1329 | 1338 | 1  |                     |
| 1367 | 1330 | 1339 | 1  |                     |
| 1368 | 1330 | 1340 | 1  |                     |
| 1369 | 1330 | 1341 | 1  |                     |
| 1370 | 1342 | 1343 | 1  | BACKBONE            |

|      |      |      |    |                     |
|------|------|------|----|---------------------|
| 1371 | 1342 | 1350 | 1  |                     |
| 1372 | 1343 | 1344 | 1  | BACKBONE            |
| 1373 | 1343 | 1346 | 1  |                     |
| 1374 | 1343 | 1351 | 1  |                     |
| 1375 | 1344 | 1345 | 2  | BACKBONE            |
| 1376 | 1344 | 1356 | am | BACKBONE   INTERRES |
| 1377 | 1346 | 1347 | 1  |                     |
| 1378 | 1346 | 1352 | 1  |                     |
| 1379 | 1346 | 1353 | 1  |                     |
| 1380 | 1347 | 1348 | 2  |                     |
| 1381 | 1347 | 1349 | am |                     |
| 1382 | 1349 | 1354 | 1  |                     |
| 1383 | 1349 | 1355 | 1  |                     |
| 1384 | 1356 | 1357 | 1  | BACKBONE            |
| 1385 | 1356 | 1364 | 1  |                     |
| 1386 | 1357 | 1358 | 1  | BACKBONE            |
| 1387 | 1357 | 1360 | 1  |                     |
| 1388 | 1357 | 1365 | 1  |                     |
| 1389 | 1358 | 1359 | 2  | BACKBONE            |
| 1390 | 1358 | 1370 | am | BACKBONE   INTERRES |
| 1391 | 1360 | 1361 | 1  |                     |
| 1392 | 1360 | 1366 | 1  |                     |
| 1393 | 1360 | 1367 | 1  |                     |
| 1394 | 1361 | 1362 | 2  |                     |
| 1395 | 1361 | 1363 | am |                     |
| 1396 | 1363 | 1368 | 1  |                     |
| 1397 | 1363 | 1369 | 1  |                     |
| 1398 | 1370 | 1371 | 1  | BACKBONE            |
| 1399 | 1370 | 1378 | 1  |                     |
| 1400 | 1371 | 1372 | 1  | BACKBONE            |
| 1401 | 1371 | 1374 | 1  |                     |
| 1402 | 1371 | 1379 | 1  |                     |
| 1403 | 1372 | 1373 | 2  | BACKBONE            |
| 1404 | 1372 | 1389 | am | BACKBONE   INTERRES |
| 1405 | 1374 | 1375 | 1  |                     |
| 1406 | 1374 | 1376 | 1  |                     |
| 1407 | 1374 | 1380 | 1  |                     |
| 1408 | 1375 | 1377 | 1  |                     |
| 1409 | 1375 | 1381 | 1  |                     |
| 1410 | 1375 | 1382 | 1  |                     |
| 1411 | 1376 | 1383 | 1  |                     |
| 1412 | 1376 | 1384 | 1  |                     |
| 1413 | 1376 | 1385 | 1  |                     |
| 1414 | 1377 | 1386 | 1  |                     |
| 1415 | 1377 | 1387 | 1  |                     |
| 1416 | 1377 | 1388 | 1  |                     |
| 1417 | 1389 | 1390 | 1  | BACKBONE            |
| 1418 | 1389 | 1399 | 1  |                     |
| 1419 | 1390 | 1391 | 1  | BACKBONE            |
| 1420 | 1390 | 1393 | 1  |                     |
| 1421 | 1390 | 1400 | 1  |                     |
| 1422 | 1391 | 1392 | 2  | BACKBONE            |



|      |      |      |    |                     |
|------|------|------|----|---------------------|
| 1423 | 1391 | 1405 | am | BACKBONE   INTERRES |
| 1424 | 1393 | 1394 | 1  |                     |
| 1425 | 1393 | 1401 | 1  |                     |
| 1426 | 1393 | 1402 | 1  |                     |
| 1427 | 1394 | 1395 | 1  |                     |
| 1428 | 1394 | 1396 | 2  |                     |
| 1429 | 1395 | 1397 | 2  |                     |
| 1430 | 1396 | 1398 | 1  |                     |
| 1431 | 1396 | 1403 | 1  |                     |
| 1432 | 1397 | 1398 | 1  |                     |
| 1433 | 1397 | 1404 | 1  |                     |
| 1434 | 1405 | 1406 | 1  | BACKBONE            |
| 1435 | 1405 | 1413 | 1  |                     |
| 1436 | 1406 | 1407 | 1  | BACKBONE            |
| 1437 | 1406 | 1409 | 1  |                     |
| 1438 | 1406 | 1414 | 1  |                     |
| 1439 | 1407 | 1408 | 2  | BACKBONE            |
| 1440 | 1407 | 1424 | am | BACKBONE   INTERRES |
| 1441 | 1409 | 1410 | 1  |                     |
| 1442 | 1409 | 1415 | 1  |                     |
| 1443 | 1409 | 1416 | 1  |                     |
| 1444 | 1410 | 1411 | 1  |                     |
| 1445 | 1410 | 1412 | 1  |                     |
| 1446 | 1410 | 1417 | 1  |                     |
| 1447 | 1411 | 1418 | 1  |                     |
| 1448 | 1411 | 1419 | 1  |                     |
| 1449 | 1411 | 1420 | 1  |                     |
| 1450 | 1412 | 1421 | 1  |                     |
| 1451 | 1412 | 1422 | 1  |                     |
| 1452 | 1412 | 1423 | 1  |                     |
| 1453 | 1424 | 1425 | 1  | BACKBONE            |
| 1454 | 1424 | 1431 | 1  |                     |
| 1455 | 1425 | 1426 | 1  | BACKBONE            |
| 1456 | 1425 | 1428 | 1  |                     |
| 1457 | 1425 | 1432 | 1  |                     |
| 1458 | 1426 | 1427 | 2  | BACKBONE            |
| 1459 | 1426 | 1438 | am | BACKBONE   INTERRES |
| 1460 | 1428 | 1429 | 1  |                     |
| 1461 | 1428 | 1430 | 1  |                     |
| 1462 | 1428 | 1433 | 1  |                     |
| 1463 | 1429 | 1434 | 1  |                     |
| 1464 | 1430 | 1435 | 1  |                     |
| 1465 | 1430 | 1436 | 1  |                     |
| 1466 | 1430 | 1437 | 1  |                     |
| 1467 | 1438 | 1439 | 1  | BACKBONE            |
| 1468 | 1438 | 1448 | 1  |                     |
| 1469 | 1439 | 1440 | 1  | BACKBONE            |
| 1470 | 1439 | 1442 | 1  |                     |
| 1471 | 1439 | 1449 | 1  |                     |
| 1472 | 1440 | 1441 | 2  | BACKBONE            |
| 1473 | 1442 | 1443 | 1  |                     |
| 1474 | 1442 | 1450 | 1  |                     |

1475 1442 1451 1  
1476 1443 1444 1  
1477 1443 1445 2  
1478 1444 1446 ar  
1479 1444 1452 1  
1480 1445 1447 1  
1481 1445 1453 1  
1482 1446 1447 1  
1483 1446 1454 1

@<TRIPOS>SUBSTRUCTURE

1 MET252 2 RESIDUE 4 A MET 1  
2 GLN253 22 RESIDUE 4 A GLN 2  
3 THR254 39 RESIDUE 4 A THR 2  
4 HIS255 53 RESIDUE 4 A HIS 2  
5 ALA256 70 RESIDUE 4 A ALA 2  
6 ALA257 80 RESIDUE 4 A ALA 2  
7 ARG258 90 RESIDUE 4 A ARG 2  
8 MET259 114 RESIDUE 4 A MET 2  
9 ARG260 133 RESIDUE 4 A ARG 2  
10 THR261 157 RESIDUE 4 A THR 2  
11 PHE262 171 RESIDUE 4 A PHE 2  
12 MET263 191 RESIDUE 4 A MET 2  
13 TYR264 210 RESIDUE 4 A TYR 2  
14 TRP265 231 RESIDUE 4 A TRP 2  
15 PRO266 255 RESIDUE 4 A PRO 2  
16 SER267 269 RESIDUE 4 A SER 2  
17 SER268 280 RESIDUE 4 A SER 2  
18 VAL269 291 RESIDUE 4 A VAL 2  
19 PRO270 307 RESIDUE 4 A PRO 2  
20 VAL271 321 RESIDUE 4 A VAL 2  
21 GLN272 337 RESIDUE 4 A GLN 2  
22 PRO273 354 RESIDUE 4 A PRO 2  
23 GLU274 368 RESIDUE 4 A GLU 2  
24 GLN275 383 RESIDUE 4 A GLN 2  
25 LEU276 400 RESIDUE 4 A LEU 2  
26 ALA277 419 RESIDUE 4 A ALA 2  
27 ALA278 429 RESIDUE 4 A ALA 2  
28 ALA279 439 RESIDUE 4 A ALA 2  
29 GLY280 449 RESIDUE 4 A GLY 2  
30 PHE281 456 RESIDUE 4 A PHE 2  
31 TYR282 476 RESIDUE 4 A TYR 2  
32 TYR283 497 RESIDUE 4 A TYR 2  
33 VAL284 518 RESIDUE 4 A VAL 2  
34 GLY285 534 RESIDUE 4 A GLY 2  
35 ARG286 541 RESIDUE 4 A ARG 2  
36 ASN287 565 RESIDUE 4 A ASN 2  
37 ASP288 579 RESIDUE 4 A ASP 2  
38 ASP289 591 RESIDUE 4 A ASP 2  
39 VAL290 603 RESIDUE 4 A VAL 2  
40 LYS291 694 RESIDUE 4 A LYS 2  
41 CYS292 713 RESIDUE 4 A CYS 2  
42 PHE293 725 RESIDUE 4 A PHE 2

43 SER294 745 RESIDUE 4 A SER 2  
44 CYS295 756 RESIDUE 4 A CYS 2  
45 ASP296 768 RESIDUE 4 A ASP 2  
46 GLY297 780 RESIDUE 4 A GLY 2  
47 GLY298 787 RESIDUE 4 A GLY 2  
48 LEU299 794 RESIDUE 4 A LEU 2  
49 ARG300 813 RESIDUE 4 A ARG 2  
50 CYS301 837 RESIDUE 4 A CYS 2  
51 TRP302 850 RESIDUE 4 A TRP 2  
52 GLU303 874 RESIDUE 4 A GLU 2  
53 SER304 889 RESIDUE 4 A SER 2  
54 GLY305 900 RESIDUE 4 A GLY 2  
55 ASP306 907 RESIDUE 4 A ASP 2  
56 ASP307 919 RESIDUE 4 A ASP 2  
57 PRO308 931 RESIDUE 4 A PRO 2  
58 TRP309 945 RESIDUE 4 A TRP 2  
59 VAL310 969 RESIDUE 4 A VAL 2  
60 GLU311 985 RESIDUE 4 A GLU 2  
61 HIS312 1000 RESIDUE 4 A HIS 2  
62 ALA313 1017 RESIDUE 4 A ALA 2  
63 LYS314 1027 RESIDUE 4 A LYS 2  
64 TRP315 1049 RESIDUE 4 A TRP 2  
65 PHE316 1073 RESIDUE 4 A PHE 2  
66 PRO317 1093 RESIDUE 4 A PRO 2  
67 GLY318 1107 RESIDUE 4 A GLY 2  
68 CYS319 1114 RESIDUE 4 A CYS 2  
69 GLU320 1126 RESIDUE 4 A GLU 2  
70 PHE321 1141 RESIDUE 4 A PHE 2  
71 LEU322 1161 RESIDUE 4 A LEU 2  
72 ILE323 1180 RESIDUE 4 A ILE 2  
73 ARG324 1199 RESIDUE 4 A ARG 2  
74 MET325 1223 RESIDUE 4 A MET 2  
75 LYS326 1242 RESIDUE 4 A LYS 2  
76 GLY327 1264 RESIDUE 4 A GLY 2  
77 GLN328 1271 RESIDUE 4 A GLN 2  
78 GLU329 1288 RESIDUE 4 A GLU 2  
79 TYR330 1303 RESIDUE 4 A TYR 2  
80 ILE331 1324 RESIDUE 4 A ILE 2  
81 ASN332 1343 RESIDUE 4 A ASN 2  
82 ASN333 1357 RESIDUE 4 A ASN 2  
83 ILE334 1371 RESIDUE 4 A ILE 2  
84 HIS335 1390 RESIDUE 4 A HIS 2  
85 LEU336 1406 RESIDUE 4 A LEU 2  
86 THR337 1425 RESIDUE 4 A THR 2  
87 HIS338 1439 RESIDUE 4 A HIS 1

# MOE 2019.01 (io\_trps.svl 2018.10)



## clAP2-BIR3 + compound 2 .mol2 file

@<TRIPOS>MOLECULE  
2uvl\_142D6\_covalent.A  
1578 1606 94 0 0  
BIOPOLYMER  
USER\_CHARGES

### @<TRIPOS>ATOM

|          |         |          |         |      |   |        |        |
|----------|---------|----------|---------|------|---|--------|--------|
| 1 N      | 0.0681  | -12.8082 | -2.5298 | N.3  | 1 | SER242 | 0.0000 |
| BACKBONE |         |          |         |      |   |        |        |
| 2 CA     | 0.6315  | -11.5151 | -2.9055 | C.3  | 1 | SER242 | 0.0000 |
| BACKBONE |         |          |         |      |   |        |        |
| 3 C      | -0.1291 | -10.3865 | -2.2485 | C.2  | 1 | SER242 | 0.0000 |
| BACKBONE |         |          |         |      |   |        |        |
| 4 O      | -1.1674 | -10.6573 | -1.6659 | O.2  | 1 | SER242 | 0.0000 |
| BACKBONE |         |          |         |      |   |        |        |
| 5 CB     | 0.5518  | -11.3629 | -4.4458 | C.3  | 1 | SER242 | 0.0000 |
| 6 OG     | -0.8320 | -11.3577 | -4.8365 | O.3  | 1 | SER242 | 0.0000 |
| 7 H      | -0.8250 | -12.8533 | -2.0788 | H    | 1 | SER242 | 0.0000 |
| 8 HA     | 1.6836  | -11.4734 | -2.5767 | H    | 1 | SER242 | 0.0000 |
| 9 HB3    | 1.0775  | -12.2069 | -4.9233 | H    | 1 | SER242 | 0.0000 |
| 10 HB2   | 1.0366  | -10.4250 | -4.7644 | H    | 1 | SER242 | 0.0000 |
| 11 HG    | -0.9471 | -11.2657 | -5.7772 | H    | 1 | SER242 | 0.0000 |
| 12 NCAP  | 0.5599  | -13.6468 | -2.7707 | H    | 1 | SER242 | 0.0000 |
| 13 N     | 0.3697  | -9.1300  | -2.3410 | N.am | 2 | MET243 | 0.0000 |
| BACKBONE |         |          |         |      |   |        |        |
| 14 CA    | -0.3511 | -7.9864  | -1.7839 | C.3  | 2 | MET243 | 0.0000 |
| BACKBONE |         |          |         |      |   |        |        |
| 15 C     | -0.4482 | -6.8994  | -2.8293 | C.2  | 2 | MET243 | 0.0000 |
| BACKBONE |         |          |         |      |   |        |        |
| 16 O     | 0.4381  | -6.8066  | -3.6638 | O.2  | 2 | MET243 | 0.0000 |
| BACKBONE |         |          |         |      |   |        |        |
| 17 CB    | 0.3940  | -7.4216  | -0.5455 | C.3  | 2 | MET243 | 0.0000 |
| 18 CG    | 0.3659  | -8.4050  | 0.6545  | C.3  | 2 | MET243 | 0.0000 |
| 19 SD    | -1.3291 | -8.7439  | 1.2464  | S.o  | 2 | MET243 | 0.0000 |
| 20 CE    | -1.8862 | -7.1107  | 1.8321  | C.3  | 2 | MET243 | 0.0000 |
| 21 H     | 1.2464  | -8.9491  | -2.7919 | H    | 2 | MET243 | 0.0000 |
| 22 HA    | -1.3779 | -8.2630  | -1.4985 | H    | 2 | MET243 | 0.0000 |
| 23 HB3   | -0.0476 | -6.4595  | -0.2440 | H    | 2 | MET243 | 0.0000 |
| 24 HB2   | 1.4425  | -7.2289  | -0.8261 | H    | 2 | MET243 | 0.0000 |
| 25 HG3   | 0.9474  | -7.9931  | 1.4944  | H    | 2 | MET243 | 0.0000 |
| 26 HG2   | 0.8169  | -9.3651  | 0.3600  | H    | 2 | MET243 | 0.0000 |
| 27 LPD2  | -1.3256 | -9.1969  | 1.7521  | LP   | 2 | MET243 | 0.0000 |
| 28 LPD1  | -1.7235 | -8.9705  | 0.7422  | LP   | 2 | MET243 | 0.0000 |
| 29 HE3   | -1.1077 | -6.6430  | 2.4529  | H    | 2 | MET243 | 0.0000 |
| 30 HE2   | -2.7960 | -7.2432  | 2.4355  | H    | 2 | MET243 | 0.0000 |
| 31 HE1   | -2.1219 | -6.4579  | 0.9791  | H    | 2 | MET243 | 0.0000 |
| 32 N     | -1.5131 | -6.0645  | -2.7862 | N.am | 3 | ARG244 | 0.0000 |
| BACKBONE |         |          |         |      |   |        |        |

|          |         |         |         |       |   |        |        |
|----------|---------|---------|---------|-------|---|--------|--------|
| 33 CA    | -1.6018 | -4.9350 | -3.7096 | C.3   | 3 | ARG244 | 0.0000 |
| BACKBONE |         |         |         |       |   |        |        |
| 34 C     | -0.6365 | -3.9019 | -3.1886 | C.2   | 3 | ARG244 | 0.0000 |
| BACKBONE |         |         |         |       |   |        |        |
| 35 O     | -0.5027 | -3.8355 | -1.9764 | O.2   | 3 | ARG244 | 0.0000 |
| BACKBONE |         |         |         |       |   |        |        |
| 36 CB    | -3.0476 | -4.3614 | -3.7117 | C.3   | 3 | ARG244 | 0.0000 |
| 37 CG    | -3.3158 | -3.2719 | -4.7894 | C.3   | 3 | ARG244 | 0.0000 |
| 38 CD    | -4.7942 | -2.7887 | -4.7228 | C.3   | 3 | ARG244 | 0.0000 |
| 39 NE    | -5.2494 | -2.2341 | -6.0045 | N.pl3 | 3 | ARG244 | 0.0000 |
| 40 CZ    | -5.1342 | -0.9727 | -6.3673 | C.cat | 3 | ARG244 | 1.0000 |
| 41 NH1   | -4.5317 | -0.0609 | -5.6406 | N.pl3 | 3 | ARG244 | 0.0000 |
| 42 NH2   | -5.6495 | -0.6025 | -7.5194 | N.pl3 | 3 | ARG244 | 0.0000 |
| 43 H     | -2.2151 | -6.1560 | -2.0763 | H     | 3 | ARG244 | 0.0000 |
| 44 HA    | -1.3401 | -5.2624 | -4.7295 | H     | 3 | ARG244 | 0.0000 |
| 45 HB3   | -3.2788 | -3.9482 | -2.7161 | H     | 3 | ARG244 | 0.0000 |
| 46 HB2   | -3.7262 | -5.2108 | -3.8964 | H     | 3 | ARG244 | 0.0000 |
| 47 HG3   | -3.1278 | -3.7077 | -5.7838 | H     | 3 | ARG244 | 0.0000 |
| 48 HG2   | -2.6359 | -2.4151 | -4.6553 | H     | 3 | ARG244 | 0.0000 |
| 49 HD3   | -4.9683 | -2.1295 | -3.8583 | H     | 3 | ARG244 | 0.0000 |
| 50 HD2   | -5.4331 | -3.6682 | -4.5357 | H     | 3 | ARG244 | 0.0000 |
| 51 HE    | -5.7329 | -2.8890 | -6.6423 | H     | 3 | ARG244 | 0.0000 |
| 52 HH11  | -4.0856 | -0.2902 | -4.7460 | H     | 3 | ARG244 | 0.0000 |
| 53 HH12  | -4.4834 | 0.9185  | -5.9596 | H     | 3 | ARG244 | 0.0000 |
| 54 HH21  | -6.1360 | -1.2765 | -8.1302 | H     | 3 | ARG244 | 0.0000 |
| 55 HH22  | -5.5840 | 0.3739  | -7.8452 | H     | 3 | ARG244 | 0.0000 |
| 56 N     | 0.0309  | -3.0965 | -4.0489 | N.am  | 4 | TYR245 | 0.0000 |
| BACKBONE |         |         |         |       |   |        |        |
| 57 CA    | 0.8772  | -2.0224 | -3.5335 | C.3   | 4 | TYR245 | 0.0000 |
| BACKBONE |         |         |         |       |   |        |        |
| 58 C     | 0.6785  | -0.7982 | -4.3949 | C.2   | 4 | TYR245 | 0.0000 |
| BACKBONE |         |         |         |       |   |        |        |
| 59 O     | 0.7531  | -0.9268 | -5.6069 | O.2   | 4 | TYR245 | 0.0000 |
| BACKBONE |         |         |         |       |   |        |        |
| 60 CB    | 2.3806  | -2.4034 | -3.4754 | C.3   | 4 | TYR245 | 0.0000 |
| 61 CG    | 3.0329  | -2.3458 | -4.8646 | C.ar  | 4 | TYR245 | 0.0000 |
| 62 CD1   | 3.5607  | -1.1392 | -5.3407 | C.ar  | 4 | TYR245 | 0.0000 |
| 63 CD2   | 3.1077  | -3.4874 | -5.6687 | C.ar  | 4 | TYR245 | 0.0000 |
| 64 CE1   | 4.1686  | -1.0727 | -6.5969 | C.ar  | 4 | TYR245 | 0.0000 |
| 65 CE2   | 3.7247  | -3.4243 | -6.9219 | C.ar  | 4 | TYR245 | 0.0000 |
| 66 CZ    | 4.2615  | -2.2223 | -7.3917 | C.ar  | 4 | TYR245 | 0.0000 |
| 67 OH    | 4.8794  | -2.1919 | -8.6464 | O.3   | 4 | TYR245 | 0.0000 |
| 68 H     | -0.0487 | -3.2048 | -5.0422 | H     | 4 | TYR245 | 0.0000 |
| 69 HA    | 0.5744  | -1.7840 | -2.5004 | H     | 4 | TYR245 | 0.0000 |
| 70 HB2   | 2.4869  | -3.4072 | -3.0347 | H     | 4 | TYR245 | 0.0000 |
| 71 HB3   | 2.9154  | -1.6956 | -2.8200 | H     | 4 | TYR245 | 0.0000 |
| 72 HD1   | 3.4944  | -0.2410 | -4.7366 | H     | 4 | TYR245 | 0.0000 |
| 73 HD2   | 2.6865  | -4.4260 | -5.3232 | H     | 4 | TYR245 | 0.0000 |
| 74 HE1   | 4.5632  | -0.1241 | -6.9471 | H     | 4 | TYR245 | 0.0000 |
| 75 HE2   | 3.7889  | -4.3156 | -7.5375 | H     | 4 | TYR245 | 0.0000 |
| 76 HH    | 5.2427  | -1.3461 | -8.8838 | H     | 4 | TYR245 | 0.0000 |

|          |         |        |         |      |   |        |        |
|----------|---------|--------|---------|------|---|--------|--------|
| 77 N     | 0.4289  | 0.3842 | -3.7917 | N.am | 5 | THR246 | 0.0000 |
| BACKBONE |         |        |         |      |   |        |        |
| 78 CA    | 0.3842  | 1.6215 | -4.5624 | C.3  | 5 | THR246 | 0.0000 |
| BACKBONE |         |        |         |      |   |        |        |
| 79 C     | 1.7372  | 2.2946 | -4.5273 | C.2  | 5 | THR246 | 0.0000 |
| BACKBONE |         |        |         |      |   |        |        |
| 80 O     | 2.0917  | 2.9158 | -5.5174 | O.2  | 5 | THR246 | 0.0000 |
| BACKBONE |         |        |         |      |   |        |        |
| 81 CB    | -0.6864 | 2.5441 | -3.9267 | C.3  | 5 | THR246 | 0.0000 |
| 82 OG1   | -0.3321 | 2.7517 | -2.5489 | O.3  | 5 | THR246 | 0.0000 |
| 83 CG2   | -2.0830 | 1.8756 | -4.0357 | C.3  | 5 | THR246 | 0.0000 |
| 84 H     | 0.3051  | 0.4509 | -2.7990 | H    | 5 | THR246 | 0.0000 |
| 85 HA    | 0.1018  | 1.4381 | -5.6131 | H    | 5 | THR246 | 0.0000 |
| 86 HB    | -0.6911 | 3.5104 | -4.4609 | H    | 5 | THR246 | 0.0000 |
| 87 HG1   | -0.9416 | 3.3252 | -2.0961 | H    | 5 | THR246 | 0.0000 |
| 88 HG22  | -2.8543 | 2.5034 | -3.5649 | H    | 5 | THR246 | 0.0000 |
| 89 HG21  | -2.0900 | 0.8947 | -3.5371 | H    | 5 | THR246 | 0.0000 |
| 90 HG23  | -2.3382 | 1.7338 | -5.0963 | H    | 5 | THR246 | 0.0000 |
| 91 N     | 2.5016  | 2.2001 | -3.4104 | N.am | 6 | VAL247 | 0.0000 |
| BACKBONE |         |        |         |      |   |        |        |
| 92 CA    | 3.7505  | 2.9438 | -3.3047 | C.3  | 6 | VAL247 | 0.0000 |
| BACKBONE |         |        |         |      |   |        |        |
| 93 C     | 4.9053  | 2.1225 | -3.8263 | C.2  | 6 | VAL247 | 0.0000 |
| BACKBONE |         |        |         |      |   |        |        |
| 94 O     | 5.1874  | 1.0897 | -3.2394 | O.2  | 6 | VAL247 | 0.0000 |
| BACKBONE |         |        |         |      |   |        |        |
| 95 CB    | 4.0285  | 3.3941 | -1.8417 | C.3  | 6 | VAL247 | 0.0000 |
| 96 CG1   | 5.4183  | 4.0798 | -1.7536 | C.3  | 6 | VAL247 | 0.0000 |
| 97 CG2   | 2.9077  | 4.3568 | -1.3569 | C.3  | 6 | VAL247 | 0.0000 |
| 98 H     | 2.2472  | 1.6358 | -2.6268 | H    | 6 | VAL247 | 0.0000 |
| 99 HA    | 3.6454  | 3.8675 | -3.8837 | H    | 6 | VAL247 | 0.0000 |
| 100 HB   | 4.0393  | 2.5108 | -1.1800 | H    | 6 | VAL247 | 0.0000 |
| 101 HG13 | 6.2348  | 3.3582 | -1.9090 | H    | 6 | VAL247 | 0.0000 |
| 102 HG12 | 5.5561  | 4.5461 | -0.7691 | H    | 6 | VAL247 | 0.0000 |
| 103 HG11 | 5.4901  | 4.8531 | -2.5281 | H    | 6 | VAL247 | 0.0000 |
| 104 HG23 | 2.8766  | 5.2626 | -1.9816 | H    | 6 | VAL247 | 0.0000 |
| 105 HG22 | 3.0838  | 4.6580 | -0.3128 | H    | 6 | VAL247 | 0.0000 |
| 106 HG21 | 1.9244  | 3.8655 | -1.4093 | H    | 6 | VAL247 | 0.0000 |
| 107 N    | 5.5967  | 2.5650 | -4.9036 | N.am | 7 | SER248 | 0.0000 |
| BACKBONE |         |        |         |      |   |        |        |
| 108 CA   | 6.7653  | 1.8277 | -5.3706 | C.3  | 7 | SER248 | 0.0000 |
| BACKBONE |         |        |         |      |   |        |        |
| 109 C    | 7.9209  | 2.0463 | -4.4225 | C.2  | 7 | SER248 | 0.0000 |
| BACKBONE |         |        |         |      |   |        |        |
| 110 O    | 8.4286  | 1.0670 | -3.8983 | O.2  | 7 | SER248 | 0.0000 |
| BACKBONE |         |        |         |      |   |        |        |
| 111 CB   | 7.1900  | 2.2543 | -6.7992 | C.3  | 7 | SER248 | 0.0000 |
| 112 OG   | 8.3794  | 1.5344 | -7.1684 | O.3  | 7 | SER248 | 0.0000 |
| 113 H    | 5.3571  | 3.4145 | -5.3759 | H    | 7 | SER248 | 0.0000 |
| 114 HA   | 6.5263  | 0.7513 | -5.4169 | H    | 7 | SER248 | 0.0000 |
| 115 HB3  | 7.3870  | 3.3388 | -6.8319 | H    | 7 | SER248 | 0.0000 |
| 116 HB2  | 6.3676  | 2.0231 | -7.4969 | H    | 7 | SER248 | 0.0000 |

|          |      |         |         |         |      |    |        |        |
|----------|------|---------|---------|---------|------|----|--------|--------|
| 117      | HG   | 8.6924  | 1.7592  | -8.0390 | H    | 7  | SER248 | 0.0000 |
| 118      | N    | 8.3588  | 3.3107  | -4.2035 | N.am | 8  | ASN249 | 0.0000 |
| BACKBONE |      |         |         |         |      |    |        |        |
| 119      | CA   | 9.5635  | 3.5522  | -3.4114 | C.3  | 8  | ASN249 | 0.0000 |
| BACKBONE |      |         |         |         |      |    |        |        |
| 120      | C    | 9.1503  | 3.9470  | -2.0100 | C.2  | 8  | ASN249 | 0.0000 |
| BACKBONE |      |         |         |         |      |    |        |        |
| 121      | O    | 8.7860  | 5.0931  | -1.7970 | O.2  | 8  | ASN249 | 0.0000 |
| BACKBONE |      |         |         |         |      |    |        |        |
| 122      | CB   | 10.4570 | 4.6198  | -4.0991 | C.3  | 8  | ASN249 | 0.0000 |
| 123      | CG   | 11.8367 | 4.6524  | -3.4835 | C.2  | 8  | ASN249 | 0.0000 |
| 124      | OD1  | 11.9931 | 4.2227  | -2.3498 | O.2  | 8  | ASN249 | 0.0000 |
| 125      | ND2  | 12.8617 | 5.1526  | -4.2075 | N.am | 8  | ASN249 | 0.0000 |
| 126      | H    | 7.8786  | 4.1064  | -4.5768 | H    | 8  | ASN249 | 0.0000 |
| 127      | HA   | 10.1892 | 2.6438  | -3.3926 | H    | 8  | ASN249 | 0.0000 |
| 128      | HB3  | 9.9973  | 5.6165  | -4.0337 | H    | 8  | ASN249 | 0.0000 |
| 129      | HB2  | 10.5485 | 4.3534  | -5.1646 | H    | 8  | ASN249 | 0.0000 |
| 130      | HD21 | 12.7161 | 5.5127  | -5.1284 | H    | 8  | ASN249 | 0.0000 |
| 131      | HD22 | 13.7876 | 5.1605  | -3.8264 | H    | 8  | ASN249 | 0.0000 |
| 132      | N    | 9.1965  | 3.0021  | -1.0418 | N.am | 9  | LEU250 | 0.0000 |
| BACKBONE |      |         |         |         |      |    |        |        |
| 133      | CA   | 8.7803  | 3.3141  | 0.3257  | C.3  | 9  | LEU250 | 0.0000 |
| BACKBONE |      |         |         |         |      |    |        |        |
| 134      | C    | 9.7659  | 4.2510  | 0.9909  | C.2  | 9  | LEU250 | 0.0000 |
| BACKBONE |      |         |         |         |      |    |        |        |
| 135      | O    | 9.3459  | 5.0457  | 1.8174  | O.2  | 9  | LEU250 | 0.0000 |
| BACKBONE |      |         |         |         |      |    |        |        |
| 136      | CB   | 8.6421  | 2.0196  | 1.1769  | C.3  | 9  | LEU250 | 0.0000 |
| 137      | CG   | 7.5103  | 1.0706  | 0.6687  | C.3  | 9  | LEU250 | 0.0000 |
| 138      | CD1  | 7.7555  | -0.3798 | 1.1710  | C.3  | 9  | LEU250 | 0.0000 |
| 139      | CD2  | 6.1009  | 1.5451  | 1.1268  | C.3  | 9  | LEU250 | 0.0000 |
| 140      | H    | 9.5350  | 2.0806  | -1.2410 | H    | 9  | LEU250 | 0.0000 |
| 141      | HA   | 7.8021  | 3.8115  | 0.2889  | H    | 9  | LEU250 | 0.0000 |
| 142      | HB3  | 8.4454  | 2.2801  | 2.2296  | H    | 9  | LEU250 | 0.0000 |
| 143      | HB2  | 9.6169  | 1.5066  | 1.1423  | H    | 9  | LEU250 | 0.0000 |
| 144      | HG   | 7.5161  | 1.0398  | -0.4342 | H    | 9  | LEU250 | 0.0000 |
| 145      | HD13 | 8.7172  | -0.7620 | 0.7939  | H    | 9  | LEU250 | 0.0000 |
| 146      | HD12 | 6.9597  | -1.0529 | 0.8154  | H    | 9  | LEU250 | 0.0000 |
| 147      | HD11 | 7.7742  | -0.4062 | 2.2712  | H    | 9  | LEU250 | 0.0000 |
| 148      | HD23 | 6.0293  | 1.5303  | 2.2250  | H    | 9  | LEU250 | 0.0000 |
| 149      | HD22 | 5.3251  | 0.8776  | 0.7201  | H    | 9  | LEU250 | 0.0000 |
| 150      | HD21 | 5.8800  | 2.5637  | 0.7830  | H    | 9  | LEU250 | 0.0000 |
| 151      | N    | 11.0783 | 4.1920  | 0.6662  | N.am | 10 | SER251 | 0.0000 |
| BACKBONE |      |         |         |         |      |    |        |        |
| 152      | CA   | 12.0241 | 5.0962  | 1.3206  | C.3  | 10 | SER251 | 0.0000 |
| BACKBONE |      |         |         |         |      |    |        |        |
| 153      | C    | 11.8203 | 6.5422  | 0.9198  | C.2  | 10 | SER251 | 0.0000 |
| BACKBONE |      |         |         |         |      |    |        |        |
| 154      | O    | 12.3483 | 7.3895  | 1.6230  | O.2  | 10 | SER251 | 0.0000 |
| BACKBONE |      |         |         |         |      |    |        |        |
| 155      | CB   | 13.4902 | 4.6993  | 1.0069  | C.3  | 10 | SER251 | 0.0000 |
| 156      | OG   | 13.7244 | 4.8440  | -0.4026 | O.3  | 10 | SER251 | 0.0000 |



|          |         |         |              |           |        |
|----------|---------|---------|--------------|-----------|--------|
| 157 H    | 11.4230 | 3.5497  | -0.0210 H    | 10 SER251 | 0.0000 |
| 158 HA   | 11.8852 | 5.0147  | 2.4127 H     | 10 SER251 | 0.0000 |
| 159 HB3  | 13.6591 | 3.6532  | 1.3142 H     | 10 SER251 | 0.0000 |
| 160 HB2  | 14.1826 | 5.3483  | 1.5704 H     | 10 SER251 | 0.0000 |
| 161 HG   | 14.6136 | 4.6154  | -0.6545 H    | 10 SER251 | 0.0000 |
| 162 N    | 11.0883 | 6.8568  | -0.1786 N.am | 11 MET252 | 0.0000 |
| BACKBONE |         |         |              |           |        |
| 163 CA   | 10.9555 | 8.2458  | -0.6243 C.3  | 11 MET252 | 0.0000 |
| BACKBONE |         |         |              |           |        |
| 164 C    | 9.5457  | 8.7560  | -0.4179 C.2  | 11 MET252 | 0.0000 |
| BACKBONE |         |         |              |           |        |
| 165 O    | 9.0543  | 9.5087  | -1.2434 O.2  | 11 MET252 | 0.0000 |
| BACKBONE |         |         |              |           |        |
| 166 CB   | 11.4246 | 8.3159  | -2.1050 C.3  | 11 MET252 | 0.0000 |
| 167 CG   | 12.8552 | 7.7444  | -2.2918 C.3  | 11 MET252 | 0.0000 |
| 168 SD   | 14.0982 | 8.4917  | -1.1943 S.o  | 11 MET252 | 0.0000 |
| 169 CE   | 13.9487 | 10.2343 | -1.6636 C.3  | 11 MET252 | 0.0000 |
| 170 H    | 10.6331 | 6.1580  | -0.7322 H    | 11 MET252 | 0.0000 |
| 171 HA   | 11.5831 | 8.9345  | -0.0392 H    | 11 MET252 | 0.0000 |
| 172 HB3  | 11.3818 | 9.3469  | -2.4809 H    | 11 MET252 | 0.0000 |
| 173 HB2  | 10.7483 | 7.7128  | -2.7274 H    | 11 MET252 | 0.0000 |
| 174 HG3  | 13.1791 | 7.8598  | -3.3388 H    | 11 MET252 | 0.0000 |
| 175 HG2  | 12.8631 | 6.6784  | -2.0385 H    | 11 MET252 | 0.0000 |
| 176 LPD2 | 14.7205 | 8.2509  | -1.3199 LP   | 11 MET252 | 0.0000 |
| 177 LPD1 | 13.9456 | 8.3944  | -0.5399 LP   | 11 MET252 | 0.0000 |
| 178 HE3  | 13.9253 | 10.3344 | -2.7576 H    | 11 MET252 | 0.0000 |
| 179 HE2  | 14.8179 | 10.7697 | -1.2641 H    | 11 MET252 | 0.0000 |
| 180 HE1  | 13.0320 | 10.6525 | -1.2270 H    | 11 MET252 | 0.0000 |
| 181 N    | 8.8823  | 8.3671  | 0.6958 N.am  | 12 GLN253 | 0.0000 |
| BACKBONE |         |         |              |           |        |
| 182 CA   | 7.5197  | 8.8363  | 0.9569 C.3   | 12 GLN253 | 0.0000 |
| BACKBONE |         |         |              |           |        |
| 183 C    | 7.4959  | 10.2160 | 1.5730 C.2   | 12 GLN253 | 0.0000 |
| BACKBONE |         |         |              |           |        |
| 184 O    | 6.5010  | 10.8972 | 1.3779 O.2   | 12 GLN253 | 0.0000 |
| BACKBONE |         |         |              |           |        |
| 185 CB   | 6.7691  | 7.8563  | 1.9044 C.3   | 12 GLN253 | 0.0000 |
| 186 CG   | 6.4518  | 6.5305  | 1.1673 C.3   | 12 GLN253 | 0.0000 |
| 187 CD   | 5.8768  | 5.4802  | 2.0881 C.2   | 12 GLN253 | 0.0000 |
| 188 OE1  | 4.6765  | 5.2531  | 2.0525 O.2   | 12 GLN253 | 0.0000 |
| 189 NE2  | 6.7056  | 4.8197  | 2.9250 N.am  | 12 GLN253 | 0.0000 |
| 190 H    | 9.3257  | 7.7804  | 1.3760 H     | 12 GLN253 | 0.0000 |
| 191 HA   | 6.9560  | 8.8890  | 0.0109 H     | 12 GLN253 | 0.0000 |
| 192 HB3  | 5.8144  | 8.3005  | 2.2334 H     | 12 GLN253 | 0.0000 |
| 193 HB2  | 7.3785  | 7.6672  | 2.8029 H     | 12 GLN253 | 0.0000 |
| 194 HG3  | 7.3612  | 6.1496  | 0.6838 H     | 12 GLN253 | 0.0000 |
| 195 HG2  | 5.7235  | 6.7393  | 0.3729 H     | 12 GLN253 | 0.0000 |
| 196 HE21 | 7.6864  | 5.0165  | 2.9447 H     | 12 GLN253 | 0.0000 |
| 197 HE22 | 6.3387  | 4.1165  | 3.5360 H     | 12 GLN253 | 0.0000 |
| 198 N    | 8.5348  | 10.6542 | 2.3221 N.am  | 13 THR254 | 0.0000 |
| BACKBONE |         |         |              |           |        |

|          |         |         |         |       |    |        |        |
|----------|---------|---------|---------|-------|----|--------|--------|
| 199 CA   | 8.4489  | 11.9434 | 3.0082  | C.3   | 13 | THR254 | 0.0000 |
| BACKBONE |         |         |         |       |    |        |        |
| 200 C    | 8.9657  | 13.0600 | 2.1303  | C.2   | 13 | THR254 | 0.0000 |
| BACKBONE |         |         |         |       |    |        |        |
| 201 O    | 9.8318  | 12.8099 | 1.3076  | O.2   | 13 | THR254 | 0.0000 |
| BACKBONE |         |         |         |       |    |        |        |
| 202 CB   | 9.2583  | 11.9063 | 4.3316  | C.3   | 13 | THR254 | 0.0000 |
| 203 OG1  | 10.6139 | 11.5500 | 4.0100  | O.3   | 13 | THR254 | 0.0000 |
| 204 CG2  | 8.6453  | 10.8747 | 5.3181  | C.3   | 13 | THR254 | 0.0000 |
| 205 H    | 9.3745  | 10.1191 | 2.4283  | H     | 13 | THR254 | 0.0000 |
| 206 HA   | 7.4006  | 12.1531 | 3.2789  | H     | 13 | THR254 | 0.0000 |
| 207 HB   | 9.2391  | 12.9082 | 4.7975  | H     | 13 | THR254 | 0.0000 |
| 208 HG1  | 11.1718 | 11.5068 | 4.7800  | H     | 13 | THR254 | 0.0000 |
| 209 HG22 | 9.2196  | 10.8596 | 6.2572  | H     | 13 | THR254 | 0.0000 |
| 210 HG21 | 8.6637  | 9.8644  | 4.8820  | H     | 13 | THR254 | 0.0000 |
| 211 HG23 | 7.6026  | 11.1378 | 5.5545  | H     | 13 | THR254 | 0.0000 |
| 212 N    | 8.4496  | 14.3007 | 2.3047  | N.am  | 14 | HIS255 | 0.0000 |
| BACKBONE |         |         |         |       |    |        |        |
| 213 CA   | 8.9489  | 15.4291 | 1.5208  | C.3   | 14 | HIS255 | 0.0000 |
| BACKBONE |         |         |         |       |    |        |        |
| 214 C    | 10.4262 | 15.6059 | 1.7696  | C.2   | 14 | HIS255 | 0.0000 |
| BACKBONE |         |         |         |       |    |        |        |
| 215 O    | 11.1528 | 15.8108 | 0.8117  | O.2   | 14 | HIS255 | 0.0000 |
| BACKBONE |         |         |         |       |    |        |        |
| 216 CB   | 8.2232  | 16.7503 | 1.8966  | C.3   | 14 | HIS255 | 0.0000 |
| 217 CG   | 8.8709  | 17.9493 | 1.2484  | C.2   | 14 | HIS255 | 0.0000 |
| 218 ND1  | 9.9276  | 18.5596 | 1.7358  | N.pl3 | 14 | HIS255 | 0.0000 |
| 219 CD2  | 8.4726  | 18.5558 | 0.1134  | C.2   | 14 | HIS255 | 0.0000 |
| 220 CE1  | 10.2479 | 19.5545 | 0.9699  | C.2   | 14 | HIS255 | 0.0000 |
| 221 NE2  | 9.4466  | 19.6092 | 0.0073  | N.2   | 14 | HIS255 | 0.0000 |
| 222 H    | 7.7346  | 14.4723 | 2.9855  | H     | 14 | HIS255 | 0.0000 |
| 223 HA   | 8.7774  | 15.2275 | 0.4493  | H     | 14 | HIS255 | 0.0000 |
| 224 HB3  | 8.2448  | 16.9035 | 2.9869  | H     | 14 | HIS255 | 0.0000 |
| 225 HB2  | 7.1687  | 16.6799 | 1.5843  | H     | 14 | HIS255 | 0.0000 |
| 226 HD1  | 10.4250 | 18.2959 | 2.5988  | H     | 14 | HIS255 | 0.0000 |
| 227 HD2  | 7.6426  | 18.3163 | -0.5434 | H     | 14 | HIS255 | 0.0000 |
| 228 HE1  | 11.0815 | 20.2373 | 1.1312  | H     | 14 | HIS255 | 0.0000 |
| 229 N    | 10.8867 | 15.5456 | 3.0401  | N.am  | 15 | ALA256 | 0.0000 |
| BACKBONE |         |         |         |       |    |        |        |
| 230 CA   | 12.3039 | 15.7774 | 3.3115  | C.3   | 15 | ALA256 | 0.0000 |
| BACKBONE |         |         |         |       |    |        |        |
| 231 C    | 13.1541 | 14.8200 | 2.5110  | C.2   | 15 | ALA256 | 0.0000 |
| BACKBONE |         |         |         |       |    |        |        |
| 232 O    | 14.0651 | 15.2717 | 1.8358  | O.2   | 15 | ALA256 | 0.0000 |
| BACKBONE |         |         |         |       |    |        |        |
| 233 CB   | 12.6460 | 15.6206 | 4.8158  | C.3   | 15 | ALA256 | 0.0000 |
| 234 H    | 10.2674 | 15.3744 | 3.8085  | H     | 15 | ALA256 | 0.0000 |
| 235 HA   | 12.5454 | 16.8130 | 3.0174  | H     | 15 | ALA256 | 0.0000 |
| 236 HB3  | 12.3963 | 14.6083 | 5.1685  | H     | 15 | ALA256 | 0.0000 |
| 237 HB2  | 12.0740 | 16.3507 | 5.4093  | H     | 15 | ALA256 | 0.0000 |
| 238 HB1  | 13.7207 | 15.7973 | 4.9810  | H     | 15 | ALA256 | 0.0000 |

|          |         |         |         |       |    |        |        |
|----------|---------|---------|---------|-------|----|--------|--------|
| 239 N    | 12.8701 | 13.4987 | 2.5689  | N.am  | 16 | ALA257 | 0.0000 |
| BACKBONE |         |         |         |       |    |        |        |
| 240 CA   | 13.6949 | 12.5437 | 1.8307  | C.3   | 16 | ALA257 | 0.0000 |
| BACKBONE |         |         |         |       |    |        |        |
| 241 C    | 13.7805 | 12.9755 | 0.3856  | C.2   | 16 | ALA257 | 0.0000 |
| BACKBONE |         |         |         |       |    |        |        |
| 242 O    | 14.8722 | 13.0650 | -0.1542 | O.2   | 16 | ALA257 | 0.0000 |
| BACKBONE |         |         |         |       |    |        |        |
| 243 CB   | 13.1172 | 11.1040 | 1.9022  | C.3   | 16 | ALA257 | 0.0000 |
| 244 H    | 12.1021 | 13.1598 | 3.1147  | H     | 16 | ALA257 | 0.0000 |
| 245 HA   | 14.7051 | 12.5382 | 2.2751  | H     | 16 | ALA257 | 0.0000 |
| 246 HB3  | 12.0968 | 11.0694 | 1.4909  | H     | 16 | ALA257 | 0.0000 |
| 247 HB2  | 13.0841 | 10.7629 | 2.9480  | H     | 16 | ALA257 | 0.0000 |
| 248 HB1  | 13.7510 | 10.4080 | 1.3315  | H     | 16 | ALA257 | 0.0000 |
| 249 N    | 12.6205 | 13.2587 | -0.2463 | N.am  | 17 | ARG258 | 0.0000 |
| BACKBONE |         |         |         |       |    |        |        |
| 250 CA   | 12.6298 | 13.6526 | -1.6524 | C.3   | 17 | ARG258 | 0.0000 |
| BACKBONE |         |         |         |       |    |        |        |
| 251 C    | 13.3940 | 14.9409 | -1.8409 | C.2   | 17 | ARG258 | 0.0000 |
| BACKBONE |         |         |         |       |    |        |        |
| 252 O    | 14.1048 | 15.0696 | -2.8245 | O.2   | 17 | ARG258 | 0.0000 |
| BACKBONE |         |         |         |       |    |        |        |
| 253 CB   | 11.1909 | 13.8337 | -2.2086 | C.3   | 17 | ARG258 | 0.0000 |
| 254 CG   | 10.3782 | 12.5080 | -2.1794 | C.3   | 17 | ARG258 | 0.0000 |
| 255 CD   | 9.0913  | 12.6136 | -3.0352 | C.3   | 17 | ARG258 | 0.0000 |
| 256 NE   | 8.1999  | 13.6481 | -2.5079 | N.pl3 | 17 | ARG258 | 0.0000 |
| 257 CZ   | 7.3339  | 13.4598 | -1.5322 | C.cat | 17 | ARG258 | 1.0000 |
| 258 NH1  | 7.2013  | 12.3244 | -0.8838 | N.pl3 | 17 | ARG258 | 0.0000 |
| 259 NH2  | 6.5561  | 14.4612 | -1.1844 | N.pl3 | 17 | ARG258 | 0.0000 |
| 260 H    | 11.7499 | 13.2271 | 0.2475  | H     | 17 | ARG258 | 0.0000 |
| 261 HA   | 13.1384 | 12.8780 | -2.2476 | H     | 17 | ARG258 | 0.0000 |
| 262 HB3  | 11.2866 | 14.1868 | -3.2464 | H     | 17 | ARG258 | 0.0000 |
| 263 HB2  | 10.6554 | 14.6069 | -1.6354 | H     | 17 | ARG258 | 0.0000 |
| 264 HG3  | 10.1073 | 12.2391 | -1.1500 | H     | 17 | ARG258 | 0.0000 |
| 265 HG2  | 10.9899 | 11.6888 | -2.5772 | H     | 17 | ARG258 | 0.0000 |
| 266 HD3  | 8.6003  | 11.6388 | -3.1347 | H     | 17 | ARG258 | 0.0000 |
| 267 HD2  | 9.3845  | 12.8830 | -4.0612 | H     | 17 | ARG258 | 0.0000 |
| 268 HE   | 8.2425  | 14.5711 | -2.9686 | H     | 17 | ARG258 | 0.0000 |
| 269 HH11 | 7.7853  | 11.5057 | -1.0877 | H     | 17 | ARG258 | 0.0000 |
| 270 HH12 | 6.5000  | 12.2256 | -0.1347 | H     | 17 | ARG258 | 0.0000 |
| 271 HH21 | 6.6155  | 15.3754 | -1.6583 | H     | 17 | ARG258 | 0.0000 |
| 272 HH22 | 5.8641  | 14.3610 | -0.4265 | H     | 17 | ARG258 | 0.0000 |
| 273 N    | 13.2511 | 15.9128 | -0.9154 | N.am  | 18 | PHE259 | 0.0000 |
| BACKBONE |         |         |         |       |    |        |        |
| 274 CA   | 13.8924 | 17.2088 | -1.1102 | C.3   | 18 | PHE259 | 0.0000 |
| BACKBONE |         |         |         |       |    |        |        |
| 275 C    | 15.3988 | 17.1096 | -0.9972 | C.2   | 18 | PHE259 | 0.0000 |
| BACKBONE |         |         |         |       |    |        |        |
| 276 O    | 16.0820 | 17.8531 | -1.6838 | O.2   | 18 | PHE259 | 0.0000 |
| BACKBONE |         |         |         |       |    |        |        |
| 277 CB   | 13.2836 | 18.2657 | -0.1518 | C.3   | 18 | PHE259 | 0.0000 |
| 278 CG   | 13.7456 | 19.7111 | -0.4161 | C.ar  | 18 | PHE259 | 0.0000 |

|          |     |         |         |         |      |    |        |        |
|----------|-----|---------|---------|---------|------|----|--------|--------|
| 279      | CD1 | 13.6892 | 20.2770 | -1.6972 | C.ar | 18 | PHE259 | 0.0000 |
| 280      | CD2 | 14.2173 | 20.4957 | 0.6444  | C.ar | 18 | PHE259 | 0.0000 |
| 281      | CE1 | 14.1448 | 21.5789 | -1.9208 | C.ar | 18 | PHE259 | 0.0000 |
| 282      | CE2 | 14.6385 | 21.8111 | 0.4298  | C.ar | 18 | PHE259 | 0.0000 |
| 283      | CZ  | 14.6155 | 22.3524 | -0.8576 | C.ar | 18 | PHE259 | 0.0000 |
| 284      | H   | 12.6922 | 15.7682 | -0.1007 | H    | 18 | PHE259 | 0.0000 |
| 285      | HA  | 13.6284 | 17.5185 | -2.1242 | H    | 18 | PHE259 | 0.0000 |
| 286      | HB3 | 13.5114 | 17.9590 | 0.8803  | H    | 18 | PHE259 | 0.0000 |
| 287      | HB2 | 12.1912 | 18.2530 | -0.2801 | H    | 18 | PHE259 | 0.0000 |
| 288      | HD1 | 13.2858 | 19.7257 | -2.5383 | H    | 18 | PHE259 | 0.0000 |
| 289      | HD2 | 14.2555 | 20.0911 | 1.6505  | H    | 18 | PHE259 | 0.0000 |
| 290      | HE1 | 14.1302 | 21.9917 | -2.9223 | H    | 18 | PHE259 | 0.0000 |
| 291      | HE2 | 14.9835 | 22.4142 | 1.2641  | H    | 18 | PHE259 | 0.0000 |
| 292      | HZ  | 14.9597 | 23.3673 | -1.0312 | H    | 18 | PHE259 | 0.0000 |
| 293      | N   | 15.9432 | 16.2030 | -0.1510 | N.am | 19 | LYS260 | 0.0000 |
| BACKBONE |     |         |         |         |      |    |        |        |
| 294      | CA  | 17.3983 | 16.0991 | -0.0182 | C.3  | 19 | LYS260 | 0.0000 |
| BACKBONE |     |         |         |         |      |    |        |        |
| 295      | C   | 18.0649 | 15.6567 | -1.3036 | C.2  | 19 | LYS260 | 0.0000 |
| BACKBONE |     |         |         |         |      |    |        |        |
| 296      | O   | 19.1434 | 16.1496 | -1.5918 | O.2  | 19 | LYS260 | 0.0000 |
| BACKBONE |     |         |         |         |      |    |        |        |
| 297      | CB  | 17.8320 | 15.0912 | 1.0849  | C.3  | 19 | LYS260 | 0.0000 |
| 298      | CG  | 17.5240 | 15.6068 | 2.5178  | C.3  | 19 | LYS260 | 0.0000 |
| 299      | CD  | 18.1073 | 14.6516 | 3.5951  | C.3  | 19 | LYS260 | 0.0000 |
| 300      | CE  | 17.8508 | 15.1851 | 5.0310  | C.3  | 19 | LYS260 | 0.0000 |
| 301      | NZ  | 18.5308 | 14.3502 | 6.0483  | N.4  | 19 | LYS260 | 1.0000 |
| 302      | H   | 15.3650 | 15.5936 | 0.3931  | H    | 19 | LYS260 | 0.0000 |
| 303      | HA  | 17.7927 | 17.0952 | 0.2449  | H    | 19 | LYS260 | 0.0000 |
| 304      | HB3 | 18.9218 | 14.9386 | 1.0097  | H    | 19 | LYS260 | 0.0000 |
| 305      | HB2 | 17.3412 | 14.1188 | 0.9143  | H    | 19 | LYS260 | 0.0000 |
| 306      | HG3 | 16.4380 | 15.7040 | 2.6641  | H    | 19 | LYS260 | 0.0000 |
| 307      | HG2 | 17.9769 | 16.6033 | 2.6470  | H    | 19 | LYS260 | 0.0000 |
| 308      | HD3 | 19.1949 | 14.5567 | 3.4436  | H    | 19 | LYS260 | 0.0000 |
| 309      | HD2 | 17.6560 | 13.6513 | 3.4886  | H    | 19 | LYS260 | 0.0000 |
| 310      | HE3 | 16.7642 | 15.2003 | 5.2231  | H    | 19 | LYS260 | 0.0000 |
| 311      | HE2 | 18.2258 | 16.2199 | 5.1101  | H    | 19 | LYS260 | 0.0000 |
| 312      | HZ3 | 18.1986 | 13.3217 | 6.0113  | H    | 19 | LYS260 | 0.0000 |
| 313      | HZ2 | 18.3390 | 14.7146 | 7.0491  | H    | 19 | LYS260 | 0.0000 |
| 314      | HZ1 | 19.6047 | 14.3515 | 5.9167  | H    | 19 | LYS260 | 0.0000 |
| 315      | N   | 17.4702 | 14.7256 | -2.0815 | N.am | 20 | THR261 | 0.0000 |
| BACKBONE |     |         |         |         |      |    |        |        |
| 316      | CA  | 18.1488 | 14.2260 | -3.2829 | C.3  | 20 | THR261 | 0.0000 |
| BACKBONE |     |         |         |         |      |    |        |        |
| 317      | C   | 18.4991 | 15.3520 | -4.2324 | C.2  | 20 | THR261 | 0.0000 |
| BACKBONE |     |         |         |         |      |    |        |        |
| 318      | O   | 19.5075 | 15.2552 | -4.9144 | O.2  | 20 | THR261 | 0.0000 |
| BACKBONE |     |         |         |         |      |    |        |        |
| 319      | CB  | 17.2339 | 13.2503 | -4.0641 | C.3  | 20 | THR261 | 0.0000 |
| 320      | OG1 | 16.0019 | 13.9621 | -4.2320 | O.3  | 20 | THR261 | 0.0000 |
| 321      | CG2 | 17.0266 | 11.9055 | -3.3160 | C.3  | 20 | THR261 | 0.0000 |
| 322      | H   | 16.5665 | 14.3698 | -1.8392 | H    | 20 | THR261 | 0.0000 |

|          |      |         |         |         |      |    |        |        |
|----------|------|---------|---------|---------|------|----|--------|--------|
| 323      | HA   | 19.0732 | 13.7038 | -2.9850 | H    | 20 | THR261 | 0.0000 |
| 324      | HB   | 17.6815 | 13.0204 | -5.0473 | H    | 20 | THR261 | 0.0000 |
| 325      | HG1  | 15.3510 | 13.4500 | -4.6896 | H    | 20 | THR261 | 0.0000 |
| 326      | HG22 | 16.3425 | 11.2580 | -3.8864 | H    | 20 | THR261 | 0.0000 |
| 327      | HG21 | 16.5993 | 12.0682 | -2.3180 | H    | 20 | THR261 | 0.0000 |
| 328      | HG23 | 17.9875 | 11.3801 | -3.2026 | H    | 20 | THR261 | 0.0000 |
| 329      | N    | 17.6869 | 16.4329 | -4.2890 | N.am | 21 | PHE262 | 0.0000 |
| BACKBONE |      |         |         |         |      |    |        |        |
| 330      | CA   | 17.9996 | 17.5483 | -5.1837 | C.3  | 21 | PHE262 | 0.0000 |
| BACKBONE |      |         |         |         |      |    |        |        |
| 331      | C    | 19.2393 | 18.3220 | -4.7665 | C.2  | 21 | PHE262 | 0.0000 |
| BACKBONE |      |         |         |         |      |    |        |        |
| 332      | O    | 19.5602 | 19.2733 | -5.4606 | O.2  | 21 | PHE262 | 0.0000 |
| BACKBONE |      |         |         |         |      |    |        |        |
| 333      | CB   | 16.7890 | 18.5189 | -5.3006 | C.3  | 21 | PHE262 | 0.0000 |
| 334      | CG   | 15.5815 | 17.8325 | -5.9642 | C.ar | 21 | PHE262 | 0.0000 |
| 335      | CD1  | 15.4814 | 17.7568 | -7.3567 | C.ar | 21 | PHE262 | 0.0000 |
| 336      | CD2  | 14.5551 | 17.2764 | -5.1967 | C.ar | 21 | PHE262 | 0.0000 |
| 337      | CE1  | 14.4231 | 17.0758 | -7.9648 | C.ar | 21 | PHE262 | 0.0000 |
| 338      | CE2  | 13.4546 | 16.6583 | -5.7947 | C.ar | 21 | PHE262 | 0.0000 |
| 339      | CZ   | 13.3989 | 16.5314 | -7.1851 | C.ar | 21 | PHE262 | 0.0000 |
| 340      | H    | 16.8750 | 16.4917 | -3.7086 | H    | 21 | PHE262 | 0.0000 |
| 341      | HA   | 18.1963 | 17.1400 | -6.1893 | H    | 21 | PHE262 | 0.0000 |
| 342      | HB3  | 17.0563 | 19.3991 | -5.9034 | H    | 21 | PHE262 | 0.0000 |
| 343      | HB2  | 16.5255 | 18.8871 | -4.2965 | H    | 21 | PHE262 | 0.0000 |
| 344      | HD1  | 16.2321 | 18.2275 | -7.9715 | H    | 21 | PHE262 | 0.0000 |
| 345      | HD2  | 14.6186 | 17.3285 | -4.1228 | H    | 21 | PHE262 | 0.0000 |
| 346      | HE1  | 14.4032 | 16.9674 | -9.0425 | H    | 21 | PHE262 | 0.0000 |
| 347      | HE2  | 12.6461 | 16.2749 | -5.1792 | H    | 21 | PHE262 | 0.0000 |
| 348      | HZ   | 12.5713 | 16.0107 | -7.6563 | H    | 21 | PHE262 | 0.0000 |
| 349      | N    | 19.9641 | 17.9769 | -3.6733 | N.am | 22 | PHE263 | 0.0000 |
| BACKBONE |      |         |         |         |      |    |        |        |
| 350      | CA   | 21.1588 | 18.7381 | -3.2987 | C.3  | 22 | PHE263 | 0.0000 |
| BACKBONE |      |         |         |         |      |    |        |        |
| 351      | C    | 22.0490 | 19.0305 | -4.4891 | C.2  | 22 | PHE263 | 0.0000 |
| BACKBONE |      |         |         |         |      |    |        |        |
| 352      | O    | 22.5759 | 20.1295 | -4.5616 | O.2  | 22 | PHE263 | 0.0000 |
| BACKBONE |      |         |         |         |      |    |        |        |
| 353      | CB   | 22.0179 | 18.0417 | -2.2020 | C.3  | 22 | PHE263 | 0.0000 |
| 354      | CG   | 22.9089 | 16.9239 | -2.7730 | C.ar | 22 | PHE263 | 0.0000 |
| 355      | CD1  | 24.2744 | 17.1515 | -2.9879 | C.ar | 22 | PHE263 | 0.0000 |
| 356      | CD2  | 22.3759 | 15.6677 | -3.0823 | C.ar | 22 | PHE263 | 0.0000 |
| 357      | CE1  | 25.0970 | 16.1345 | -3.4804 | C.ar | 22 | PHE263 | 0.0000 |
| 358      | CE2  | 23.1855 | 14.6643 | -3.6238 | C.ar | 22 | PHE263 | 0.0000 |
| 359      | CZ   | 24.5507 | 14.8940 | -3.8157 | C.ar | 22 | PHE263 | 0.0000 |
| 360      | H    | 19.6704 | 17.2486 | -3.0606 | H    | 22 | PHE263 | 0.0000 |
| 361      | HA   | 20.7878 | 19.6913 | -2.8839 | H    | 22 | PHE263 | 0.0000 |
| 362      | HB3  | 21.3794 | 17.6349 | -1.4029 | H    | 22 | PHE263 | 0.0000 |
| 363      | HB2  | 22.6634 | 18.8019 | -1.7325 | H    | 22 | PHE263 | 0.0000 |
| 364      | HD1  | 24.7095 | 18.1225 | -2.7740 | H    | 22 | PHE263 | 0.0000 |
| 365      | HD2  | 21.3285 | 15.4588 | -2.9046 | H    | 22 | PHE263 | 0.0000 |
| 366      | HE1  | 26.1612 | 16.3106 | -3.6068 | H    | 22 | PHE263 | 0.0000 |

|          |         |         |                |           |        |
|----------|---------|---------|----------------|-----------|--------|
| 367 HE2  | 22.7551 | 13.7053 | -3.8937 H      | 22 PHE263 | 0.0000 |
| 368 HZ   | 25.1836 | 14.1119 | -4.2237 H      | 22 PHE263 | 0.0000 |
| 369 N    | 22.2161 | 18.0618 | -5.4232 N.am   | 23 ASN264 | 0.0000 |
| BACKBONE |         |         |                |           |        |
| 370 CA   | 23.0386 | 18.2769 | -6.6165 C.3    | 23 ASN264 | 0.0000 |
| BACKBONE |         |         |                |           |        |
| 371 C    | 22.1375 | 18.4139 | -7.8240 C.2    | 23 ASN264 | 0.0000 |
| BACKBONE |         |         |                |           |        |
| 372 O    | 22.3233 | 17.7080 | -8.8029 O.2    | 23 ASN264 | 0.0000 |
| BACKBONE |         |         |                |           |        |
| 373 CB   | 24.0639 | 17.1213 | -6.7831 C.3    | 23 ASN264 | 0.0000 |
| 374 CG   | 23.4195 | 15.7556 | -6.8353 C.2    | 23 ASN264 | 0.0000 |
| 375 OD1  | 22.2400 | 15.6336 | -6.5408 O.2    | 23 ASN264 | 0.0000 |
| 376 ND2  | 24.1785 | 14.7007 | -7.2022 N.am   | 23 ASN264 | 0.0000 |
| 377 H    | 21.7470 | 17.1813 | -5.3396 H      | 23 ASN264 | 0.0000 |
| 378 HA   | 23.6194 | 19.2125 | -6.5535 H      | 23 ASN264 | 0.0000 |
| 379 HB3  | 24.7549 | 17.1388 | -5.9284 H      | 23 ASN264 | 0.0000 |
| 380 HB2  | 24.6553 | 17.2848 | -7.6986 H      | 23 ASN264 | 0.0000 |
| 381 HD21 | 25.1457 | 14.8148 | -7.4342 H      | 23 ASN264 | 0.0000 |
| 382 HD22 | 23.7721 | 13.7870 | -7.2455 H      | 23 ASN264 | 0.0000 |
| 383 N    | 21.1551 | 19.3423 | -7.7591 N.am   | 24 TRP265 | 0.0000 |
| BACKBONE |         |         |                |           |        |
| 384 CA   | 20.2747 | 19.6003 | -8.9009 C.3    | 24 TRP265 | 0.0000 |
| BACKBONE |         |         |                |           |        |
| 385 C    | 20.8423 | 20.7986 | -9.6247 C.2    | 24 TRP265 | 0.0000 |
| BACKBONE |         |         |                |           |        |
| 386 O    | 21.1724 | 21.7412 | -8.9219 O.2    | 24 TRP265 | 0.0000 |
| BACKBONE |         |         |                |           |        |
| 387 CB   | 18.8555 | 19.9309 | -8.3772 C.3    | 24 TRP265 | 0.0000 |
| 388 CG   | 17.8394 | 20.3195 | -9.4194 C.2    | 24 TRP265 | 0.0000 |
| 389 CD1  | 17.4345 | 21.5626 | -9.7247 C.2    | 24 TRP265 | 0.0000 |
| 390 CD2  | 17.0461 | 19.3762 | -10.2891 C.ar  | 24 TRP265 | 0.0000 |
| 391 NE1  | 16.4874 | 21.5063 | -10.6272 N.pl3 | 24 TRP265 | 0.0000 |
| 392 CE2  | 16.1930 | 20.2344 | -10.9564 C.ar  | 24 TRP265 | 0.0000 |
| 393 CE3  | 17.0171 | 17.9983 | -10.4920 C.ar  | 24 TRP265 | 0.0000 |
| 394 CZ2  | 15.1926 | 19.7587 | -11.8030 C.ar  | 24 TRP265 | 0.0000 |
| 395 CZ3  | 15.9999 | 17.5082 | -11.3207 C.ar  | 24 TRP265 | 0.0000 |
| 396 CH2  | 15.0788 | 18.3687 | -11.9367 C.ar  | 24 TRP265 | 0.0000 |
| 397 H    | 21.0565 | 19.9168 | -6.9439 H      | 24 TRP265 | 0.0000 |
| 398 HA   | 20.1955 | 18.7011 | -9.5301 H      | 24 TRP265 | 0.0000 |
| 399 HB3  | 18.9129 | 20.7566 | -7.6505 H      | 24 TRP265 | 0.0000 |
| 400 HB2  | 18.4855 | 19.0416 | -7.8516 H      | 24 TRP265 | 0.0000 |
| 401 HD1  | 17.8255 | 22.4772 | -9.2787 H      | 24 TRP265 | 0.0000 |
| 402 HE1  | 16.0087 | 22.3319 | -11.0175 H     | 24 TRP265 | 0.0000 |
| 403 HE3  | 17.7448 | 17.3463 | -10.0216 H     | 24 TRP265 | 0.0000 |
| 404 HZ2  | 14.5297 | 20.4355 | -12.3249 H     | 24 TRP265 | 0.0000 |
| 405 HZ3  | 15.9161 | 16.4434 | -11.4921 H     | 24 TRP265 | 0.0000 |
| 406 HH2  | 14.2665 | 17.9529 | -12.5251 H     | 24 TRP265 | 0.0000 |
| 407 N    | 20.9974 | 20.8498 | -10.9717 N.am  | 25 PRO266 | 0.0000 |
| BACKBONE |         |         |                |           |        |
| 408 CA   | 21.6225 | 22.0185 | -11.5772 C.3   | 25 PRO266 | 0.0000 |
| BACKBONE |         |         |                |           |        |

|          |         |         |          |      |    |        |        |
|----------|---------|---------|----------|------|----|--------|--------|
| 409 C    | 20.6967 | 23.2124 | -11.5165 | C.2  | 25 | PRO266 | 0.0000 |
| BACKBONE |         |         |          |      |    |        |        |
| 410 O    | 19.4967 | 23.0152 | -11.4105 | O.2  | 25 | PRO266 | 0.0000 |
| BACKBONE |         |         |          |      |    |        |        |
| 411 CB   | 21.8396 | 21.5042 | -13.0207 | C.3  | 25 | PRO266 | 0.0000 |
| 412 CG   | 20.6861 | 20.4937 | -13.2127 | C.3  | 25 | PRO266 | 0.0000 |
| 413 CD   | 20.5957 | 19.7628 | -11.8542 | C.3  | 25 | PRO266 | 0.0000 |
| 414 HA   | 22.5879 | 22.2465 | -11.0948 | H    | 25 | PRO266 | 0.0000 |
| 415 HB3  | 22.7947 | 20.9556 | -13.0807 | H    | 25 | PRO266 | 0.0000 |
| 416 HB2  | 21.8437 | 22.3079 | -13.7740 | H    | 25 | PRO266 | 0.0000 |
| 417 HG2  | 19.7528 | 21.0559 | -13.3578 | H    | 25 | PRO266 | 0.0000 |
| 418 HG3  | 20.8357 | 19.8158 | -14.0686 | H    | 25 | PRO266 | 0.0000 |
| 419 HD2  | 19.5735 | 19.3881 | -11.6834 | H    | 25 | PRO266 | 0.0000 |
| 420 HD3  | 21.3250 | 18.9384 | -11.7980 | H    | 25 | PRO266 | 0.0000 |
| 421 N    | 21.2448 | 24.4515 | -11.5739 | N.am | 26 | SER267 | 0.0000 |
| BACKBONE |         |         |          |      |    |        |        |
| 422 CA   | 20.4147 | 25.6534 | -11.4674 | C.3  | 26 | SER267 | 0.0000 |
| BACKBONE |         |         |          |      |    |        |        |
| 423 C    | 20.0308 | 26.2237 | -12.8161 | C.2  | 26 | SER267 | 0.0000 |
| BACKBONE |         |         |          |      |    |        |        |
| 424 O    | 19.4574 | 27.3011 | -12.8257 | O.2  | 26 | SER267 | 0.0000 |
| BACKBONE |         |         |          |      |    |        |        |
| 425 CB   | 21.2063 | 26.7317 | -10.6810 | C.3  | 26 | SER267 | 0.0000 |
| 426 OG   | 22.3637 | 27.0944 | -11.4537 | O.3  | 26 | SER267 | 0.0000 |
| 427 H    | 22.2310 | 24.5757 | -11.7065 | H    | 26 | SER267 | 0.0000 |
| 428 HA   | 19.4886 | 25.4440 | -10.9056 | H    | 26 | SER267 | 0.0000 |
| 429 HB3  | 21.5154 | 26.3196 | -9.7055  | H    | 26 | SER267 | 0.0000 |
| 430 HB2  | 20.5757 | 27.6199 | -10.5029 | H    | 26 | SER267 | 0.0000 |
| 431 HG   | 22.8963 | 27.7592 | -11.0284 | H    | 26 | SER267 | 0.0000 |
| 432 N    | 20.3258 | 25.5534 | -13.9554 | N.am | 27 | SER268 | 0.0000 |
| BACKBONE |         |         |          |      |    |        |        |
| 433 CA   | 19.9567 | 26.0961 | -15.2647 | C.3  | 27 | SER268 | 0.0000 |
| BACKBONE |         |         |          |      |    |        |        |
| 434 C    | 18.6202 | 25.5775 | -15.7563 | C.2  | 27 | SER268 | 0.0000 |
| BACKBONE |         |         |          |      |    |        |        |
| 435 O    | 18.2290 | 25.9617 | -16.8472 | O.2  | 27 | SER268 | 0.0000 |
| BACKBONE |         |         |          |      |    |        |        |
| 436 CB   | 21.0649 | 25.6795 | -16.2661 | C.3  | 27 | SER268 | 0.0000 |
| 437 OG   | 21.1425 | 24.2435 | -16.2730 | O.3  | 27 | SER268 | 0.0000 |
| 438 H    | 20.7715 | 24.6574 | -13.9408 | H    | 27 | SER268 | 0.0000 |
| 439 HA   | 19.9147 | 27.1982 | -15.2467 | H    | 27 | SER268 | 0.0000 |
| 440 HB3  | 22.0278 | 26.1047 | -15.9341 | H    | 27 | SER268 | 0.0000 |
| 441 HB2  | 20.8401 | 26.0603 | -17.2767 | H    | 27 | SER268 | 0.0000 |
| 442 HG   | 21.8220 | 23.9152 | -16.8534 | H    | 27 | SER268 | 0.0000 |
| 443 N    | 17.9040 | 24.7110 | -15.0016 | N.am | 28 | VAL269 | 0.0000 |
| BACKBONE |         |         |          |      |    |        |        |
| 444 CA   | 16.6489 | 24.1419 | -15.5025 | C.3  | 28 | VAL269 | 0.0000 |
| BACKBONE |         |         |          |      |    |        |        |
| 445 C    | 15.5245 | 25.1199 | -15.2387 | C.2  | 28 | VAL269 | 0.0000 |
| BACKBONE |         |         |          |      |    |        |        |
| 446 O    | 14.7497 | 25.3952 | -16.1411 | O.2  | 28 | VAL269 | 0.0000 |
| BACKBONE |         |         |          |      |    |        |        |

|          |      |         |         |          |      |    |        |        |
|----------|------|---------|---------|----------|------|----|--------|--------|
| 447      | CB   | 16.3845 | 22.7657 | -14.8260 | C.3  | 28 | VAL269 | 0.0000 |
| 448      | CG1  | 15.0284 | 22.1632 | -15.2730 | C.3  | 28 | VAL269 | 0.0000 |
| 449      | CG2  | 17.5269 | 21.7682 | -15.1644 | C.3  | 28 | VAL269 | 0.0000 |
| 450      | H    | 18.2044 | 24.4545 | -14.0820 | H    | 28 | VAL269 | 0.0000 |
| 451      | HA   | 16.7234 | 23.9586 | -16.5877 | H    | 28 | VAL269 | 0.0000 |
| 452      | HB   | 16.3509 | 22.9059 | -13.7312 | H    | 28 | VAL269 | 0.0000 |
| 453      | HG13 | 14.1957 | 22.8446 | -15.0479 | H    | 28 | VAL269 | 0.0000 |
| 454      | HG12 | 14.8703 | 21.2189 | -14.7322 | H    | 28 | VAL269 | 0.0000 |
| 455      | HG11 | 15.0278 | 21.9599 | -16.3545 | H    | 28 | VAL269 | 0.0000 |
| 456      | HG23 | 17.4883 | 21.4701 | -16.2233 | H    | 28 | VAL269 | 0.0000 |
| 457      | HG22 | 17.4320 | 20.8667 | -14.5406 | H    | 28 | VAL269 | 0.0000 |
| 458      | HG21 | 18.5112 | 22.2195 | -14.9797 | H    | 28 | VAL269 | 0.0000 |
| 459      | N    | 15.4405 | 25.6515 | -13.9991 | N.am | 29 | LEU270 | 0.0000 |
| BACKBONE |      |         |         |          |      |    |        |        |
| 460      | CA   | 14.4470 | 26.6720 | -13.6602 | C.3  | 29 | LEU270 | 0.0000 |
| BACKBONE |      |         |         |          |      |    |        |        |
| 461      | C    | 13.0795 | 26.0954 | -13.3595 | C.2  | 29 | LEU270 | 0.0000 |
| BACKBONE |      |         |         |          |      |    |        |        |
| 462      | O    | 12.0975 | 26.7840 | -13.5895 | O.2  | 29 | LEU270 | 0.0000 |
| BACKBONE |      |         |         |          |      |    |        |        |
| 463      | CB   | 14.3761 | 27.8885 | -14.6314 | C.3  | 29 | LEU270 | 0.0000 |
| 464      | CG   | 15.7554 | 28.4051 | -15.1443 | C.3  | 29 | LEU270 | 0.0000 |
| 465      | CD1  | 15.5670 | 29.7578 | -15.8881 | C.3  | 29 | LEU270 | 0.0000 |
| 466      | CD2  | 16.7933 | 28.5877 | -14.0041 | C.3  | 29 | LEU270 | 0.0000 |
| 467      | H    | 16.0651 | 25.3498 | -13.2742 | H    | 29 | LEU270 | 0.0000 |
| 468      | HA   | 14.7449 | 27.0994 | -12.6856 | H    | 29 | LEU270 | 0.0000 |
| 469      | HB3  | 13.8534 | 28.7136 | -14.1181 | H    | 29 | LEU270 | 0.0000 |
| 470      | HB2  | 13.7631 | 27.6120 | -15.5019 | H    | 29 | LEU270 | 0.0000 |
| 471      | HG   | 16.1670 | 27.6774 | -15.8646 | H    | 29 | LEU270 | 0.0000 |
| 472      | HD13 | 14.8071 | 29.6688 | -16.6770 | H    | 29 | LEU270 | 0.0000 |
| 473      | HD12 | 16.5114 | 30.0789 | -16.3542 | H    | 29 | LEU270 | 0.0000 |
| 474      | HD11 | 15.2425 | 30.5405 | -15.1849 | H    | 29 | LEU270 | 0.0000 |
| 475      | HD23 | 16.4005 | 29.2639 | -13.2300 | H    | 29 | LEU270 | 0.0000 |
| 476      | HD22 | 17.7272 | 29.0126 | -14.4038 | H    | 29 | LEU270 | 0.0000 |
| 477      | HD21 | 17.0395 | 27.6244 | -13.5389 | H    | 29 | LEU270 | 0.0000 |
| 478      | N    | 12.9959 | 24.8636 | -12.8007 | N.am | 30 | VAL271 | 0.0000 |
| BACKBONE |      |         |         |          |      |    |        |        |
| 479      | CA   | 11.7776 | 24.4310 | -12.1092 | C.3  | 30 | VAL271 | 0.0000 |
| BACKBONE |      |         |         |          |      |    |        |        |
| 480      | C    | 12.2289 | 24.2209 | -10.6823 | C.2  | 30 | VAL271 | 0.0000 |
| BACKBONE |      |         |         |          |      |    |        |        |
| 481      | O    | 13.3696 | 23.8216 | -10.5030 | O.2  | 30 | VAL271 | 0.0000 |
| BACKBONE |      |         |         |          |      |    |        |        |
| 482      | CB   | 11.0677 | 23.1958 | -12.7297 | C.3  | 30 | VAL271 | 0.0000 |
| 483      | CG1  | 10.7039 | 23.4890 | -14.2102 | C.3  | 30 | VAL271 | 0.0000 |
| 484      | CG2  | 11.9278 | 21.9110 | -12.6241 | C.3  | 30 | VAL271 | 0.0000 |
| 485      | H    | 13.8024 | 24.2757 | -12.7166 | H    | 30 | VAL271 | 0.0000 |
| 486      | HA   | 11.0332 | 25.2444 | -12.0904 | H    | 30 | VAL271 | 0.0000 |
| 487      | HB   | 10.1347 | 23.0133 | -12.1655 | H    | 30 | VAL271 | 0.0000 |
| 488      | HG13 | 10.0396 | 24.3644 | -14.2828 | H    | 30 | VAL271 | 0.0000 |
| 489      | HG12 | 10.1852 | 22.6245 | -14.6474 | H    | 30 | VAL271 | 0.0000 |
| 490      | HG11 | 11.6122 | 23.6871 | -14.7996 | H    | 30 | VAL271 | 0.0000 |



|          |      |         |         |          |       |    |        |         |
|----------|------|---------|---------|----------|-------|----|--------|---------|
| 491      | HG23 | 12.8498 | 22.0190 | -13.2072 | H     | 30 | VAL271 | 0.0000  |
| 492      | HG22 | 11.3718 | 21.0412 | -13.0085 | H     | 30 | VAL271 | 0.0000  |
| 493      | HG21 | 12.1937 | 21.7197 | -11.5751 | H     | 30 | VAL271 | 0.0000  |
| 494      | N    | 11.4051 | 24.5182 | -9.6522  | N.am  | 31 | ASN272 | 0.0000  |
| BACKBONE |      |         |         |          |       |    |        |         |
| 495      | CA   | 11.9685 | 24.6123 | -8.3067  | C.3   | 31 | ASN272 | 0.0000  |
| BACKBONE |      |         |         |          |       |    |        |         |
| 496      | C    | 12.0451 | 23.2353 | -7.6797  | C.2   | 31 | ASN272 | 0.0000  |
| BACKBONE |      |         |         |          |       |    |        |         |
| 497      | O    | 11.0229 | 22.5691 | -7.7284  | O.2   | 31 | ASN272 | 0.0000  |
| BACKBONE |      |         |         |          |       |    |        |         |
| 498      | CB   | 11.1399 | 25.5868 | -7.4285  | C.3   | 31 | ASN272 | 0.0000  |
| 499      | CG   | 11.9152 | 25.9585 | -6.1860  | C.2   | 31 | ASN272 | 0.0000  |
| 500      | OD1  | 12.1845 | 25.0744 | -5.3873  | O.2   | 31 | ASN272 | 0.0000  |
| 501      | ND2  | 12.3029 | 27.2383 | -5.9877  | N.am  | 31 | ASN272 | 0.0000  |
| 502      | H    | 10.4383 | 24.7401 | -9.7956  | H     | 31 | ASN272 | 0.0000  |
| 503      | HA   | 12.9534 | 25.0910 | -8.4129  | H     | 31 | ASN272 | 0.0000  |
| 504      | HB3  | 10.1831 | 25.1237 | -7.1504  | H     | 31 | ASN272 | 0.0000  |
| 505      | HB2  | 10.9082 | 26.4856 | -8.0218  | H     | 31 | ASN272 | 0.0000  |
| 506      | HD21 | 12.0906 | 27.9643 | -6.6433  | H     | 31 | ASN272 | 0.0000  |
| 507      | HD22 | 12.8223 | 27.4745 | -5.1651  | H     | 31 | ASN272 | 0.0000  |
| 508      | N    | 13.1674 | 22.7398 | -7.0906  | N.am  | 32 | PRO273 | 0.0000  |
| BACKBONE |      |         |         |          |       |    |        |         |
| 509      | CA   | 13.1506 | 21.3989 | -6.5215  | C.3   | 32 | PRO273 | 0.0000  |
| BACKBONE |      |         |         |          |       |    |        |         |
| 510      | C    | 12.2156 | 21.2770 | -5.3380  | C.2   | 32 | PRO273 | 0.0000  |
| BACKBONE |      |         |         |          |       |    |        |         |
| 511      | O    | 11.7133 | 20.1866 | -5.1177  | O.2   | 32 | PRO273 | 0.0000  |
| BACKBONE |      |         |         |          |       |    |        |         |
| 512      | CB   | 14.6436 | 21.2005 | -6.1673  | C.3   | 32 | PRO273 | 0.0000  |
| 513      | CG   | 15.1987 | 22.6316 | -5.9934  | C.3   | 32 | PRO273 | 0.0000  |
| 514      | CD   | 14.4318 | 23.4645 | -7.0470  | C.3   | 32 | PRO273 | 0.0000  |
| 515      | HA   | 12.8591 | 20.6713 | -7.2909  | H     | 32 | PRO273 | 0.0000  |
| 516      | HB3  | 15.1646 | 20.7366 | -7.0227  | H     | 32 | PRO273 | 0.0000  |
| 517      | HB2  | 14.7828 | 20.5710 | -5.2748  | H     | 32 | PRO273 | 0.0000  |
| 518      | HG2  | 14.9423 | 22.9973 | -4.9871  | H     | 32 | PRO273 | 0.0000  |
| 519      | HG3  | 16.2931 | 22.6853 | -6.1182  | H     | 32 | PRO273 | 0.0000  |
| 520      | HD2  | 14.3668 | 24.5112 | -6.7129  | H     | 32 | PRO273 | 0.0000  |
| 521      | HD3  | 14.9232 | 23.4047 | -8.0318  | H     | 32 | PRO273 | 0.0000  |
| 522      | N    | 11.9437 | 22.3600 | -4.5741  | N.am  | 33 | GLU274 | 0.0000  |
| BACKBONE |      |         |         |          |       |    |        |         |
| 523      | CA   | 10.9214 | 22.2809 | -3.5271  | C.3   | 33 | GLU274 | 0.0000  |
| BACKBONE |      |         |         |          |       |    |        |         |
| 524      | C    | 9.6140  | 21.8334 | -4.1387  | C.2   | 33 | GLU274 | 0.0000  |
| BACKBONE |      |         |         |          |       |    |        |         |
| 525      | O    | 8.9705  | 20.9488 | -3.5971  | O.2   | 33 | GLU274 | 0.0000  |
| BACKBONE |      |         |         |          |       |    |        |         |
| 526      | CB   | 10.7023 | 23.6614 | -2.8397  | C.3   | 33 | GLU274 | 0.0000  |
| 527      | CG   | 9.4240  | 23.7274 | -1.9587  | C.3   | 33 | GLU274 | 0.0000  |
| 528      | CD   | 9.3849  | 22.6417 | -0.9167  | C.2   | 33 | GLU274 | 0.0000  |
| 529      | OE1  | 10.4505 | 22.3677 | -0.3031  | O.co2 | 33 | GLU274 | -0.5000 |
| 530      | OE2  | 8.2878  | 22.0586 | -0.7004  | O.co2 | 33 | GLU274 | -0.5000 |

|          |         |         |              |    |        |        |
|----------|---------|---------|--------------|----|--------|--------|
| 531 H    | 12.4022 | 23.2342 | -4.7389 H    | 33 | GLU274 | 0.0000 |
| 532 HA   | 11.2393 | 21.5453 | -2.7696 H    | 33 | GLU274 | 0.0000 |
| 533 HB3  | 10.5891 | 24.4446 | -3.6048 H    | 33 | GLU274 | 0.0000 |
| 534 HB2  | 11.5934 | 23.9018 | -2.2357 H    | 33 | GLU274 | 0.0000 |
| 535 HG3  | 8.5263  | 23.6633 | -2.5963 H    | 33 | GLU274 | 0.0000 |
| 536 HG2  | 9.3910  | 24.6989 | -1.4394 H    | 33 | GLU274 | 0.0000 |
| 537 N    | 9.2023  | 22.4518 | -5.2669 N.am | 34 | GLN275 | 0.0000 |
| BACKBONE |         |         |              |    |        |        |
| 538 CA   | 7.9127  | 22.1098 | -5.8639 C.3  | 34 | GLN275 | 0.0000 |
| BACKBONE |         |         |              |    |        |        |
| 539 C    | 7.9574  | 20.6946 | -6.3930 C.2  | 34 | GLN275 | 0.0000 |
| BACKBONE |         |         |              |    |        |        |
| 540 O    | 7.0090  | 19.9585 | -6.1708 O.2  | 34 | GLN275 | 0.0000 |
| BACKBONE |         |         |              |    |        |        |
| 541 CB   | 7.5276  | 23.0950 | -7.0008 C.3  | 34 | GLN275 | 0.0000 |
| 542 CG   | 7.2265  | 24.5161 | -6.4479 C.3  | 34 | GLN275 | 0.0000 |
| 543 CD   | 7.0126  | 25.5337 | -7.5440 C.2  | 34 | GLN275 | 0.0000 |
| 544 OE1  | 7.1942  | 25.2193 | -8.7114 O.2  | 34 | GLN275 | 0.0000 |
| 545 NE2  | 6.6255  | 26.7781 | -7.1888 N.am | 34 | GLN275 | 0.0000 |
| 546 H    | 9.7782  | 23.1418 | -5.7058 H    | 34 | GLN275 | 0.0000 |
| 547 HA   | 7.1361  | 22.1741 | -5.0829 H    | 34 | GLN275 | 0.0000 |
| 548 HB3  | 6.6239  | 22.7276 | -7.5152 H    | 34 | GLN275 | 0.0000 |
| 549 HB2  | 8.3502  | 23.1338 | -7.7326 H    | 34 | GLN275 | 0.0000 |
| 550 HG3  | 8.0569  | 24.8699 | -5.8186 H    | 34 | GLN275 | 0.0000 |
| 551 HG2  | 6.3212  | 24.4744 | -5.8208 H    | 34 | GLN275 | 0.0000 |
| 552 HE21 | 6.4806  | 27.0200 | -6.2279 H    | 34 | GLN275 | 0.0000 |
| 553 HE22 | 6.4790  | 27.4749 | -7.8925 H    | 34 | GLN275 | 0.0000 |
| 554 N    | 9.0453  | 20.2860 | -7.0869 N.am | 35 | LEU276 | 0.0000 |
| BACKBONE |         |         |              |    |        |        |
| 555 CA   | 9.1335  | 18.8980 | -7.5430 C.3  | 35 | LEU276 | 0.0000 |
| BACKBONE |         |         |              |    |        |        |
| 556 C    | 8.9482  | 17.9772 | -6.3528 C.2  | 35 | LEU276 | 0.0000 |
| BACKBONE |         |         |              |    |        |        |
| 557 O    | 8.1680  | 17.0419 | -6.4445 O.2  | 35 | LEU276 | 0.0000 |
| BACKBONE |         |         |              |    |        |        |
| 558 CB   | 10.4857 | 18.5873 | -8.2513 C.3  | 35 | LEU276 | 0.0000 |
| 559 CG   | 10.6246 | 19.1629 | -9.6960 C.3  | 35 | LEU276 | 0.0000 |
| 560 CD1  | 12.1136 | 19.1066 | -10.1414 C.3 | 35 | LEU276 | 0.0000 |
| 561 CD2  | 9.7872  | 18.3622 | -10.7369 C.3 | 35 | LEU276 | 0.0000 |
| 562 H    | 9.8018  | 20.9145 | -7.2769 H    | 35 | LEU276 | 0.0000 |
| 563 HA   | 8.3017  | 18.7167 | -8.2359 H    | 35 | LEU276 | 0.0000 |
| 564 HB3  | 10.6346 | 17.5040 | -8.3223 H    | 35 | LEU276 | 0.0000 |
| 565 HB2  | 11.2870 | 18.9661 | -7.6037 H    | 35 | LEU276 | 0.0000 |
| 566 HG   | 10.2944 | 20.2161 | -9.7042 H    | 35 | LEU276 | 0.0000 |
| 567 HD13 | 12.7327 | 19.8056 | -9.5608 H    | 35 | LEU276 | 0.0000 |
| 568 HD12 | 12.2213 | 19.3535 | -11.2066 H   | 35 | LEU276 | 0.0000 |
| 569 HD11 | 12.5029 | 18.0916 | -9.9971 H    | 35 | LEU276 | 0.0000 |
| 570 HD23 | 10.1388 | 17.3211 | -10.7999 H   | 35 | LEU276 | 0.0000 |
| 571 HD22 | 9.8866  | 18.8240 | -11.7314 H   | 35 | LEU276 | 0.0000 |
| 572 HD21 | 8.7209  | 18.3442 | -10.4901 H   | 35 | LEU276 | 0.0000 |
| 573 N    | 9.6419  | 18.2299 | -5.2189 N.am | 36 | ALA277 | 0.0000 |
| BACKBONE |         |         |              |    |        |        |

|          |         |         |         |      |    |        |        |
|----------|---------|---------|---------|------|----|--------|--------|
| 574 CA   | 9.4679  | 17.3739 | -4.0449 | C.3  | 36 | ALA277 | 0.0000 |
| BACKBONE |         |         |         |      |    |        |        |
| 575 C    | 8.0182  | 17.3684 | -3.6129 | C.2  | 36 | ALA277 | 0.0000 |
| BACKBONE |         |         |         |      |    |        |        |
| 576 O    | 7.4739  | 16.2997 | -3.3832 | O.2  | 36 | ALA277 | 0.0000 |
| BACKBONE |         |         |         |      |    |        |        |
| 577 CB   | 10.3708 | 17.8189 | -2.8647 | C.3  | 36 | ALA277 | 0.0000 |
| 578 H    | 10.2731 | 19.0042 | -5.1645 | H    | 36 | ALA277 | 0.0000 |
| 579 HA   | 9.7655  | 16.3499 | -4.3199 | H    | 36 | ALA277 | 0.0000 |
| 580 HB3  | 10.1300 | 18.8444 | -2.5503 | H    | 36 | ALA277 | 0.0000 |
| 581 HB2  | 11.4239 | 17.7886 | -3.1802 | H    | 36 | ALA277 | 0.0000 |
| 582 HB1  | 10.2404 | 17.1470 | -2.0022 | H    | 36 | ALA277 | 0.0000 |
| 583 N    | 7.3706  | 18.5506 | -3.5042 | N.am | 37 | SER278 | 0.0000 |
| BACKBONE |         |         |         |      |    |        |        |
| 584 CA   | 5.9608  | 18.5843 | -3.1150 | C.3  | 37 | SER278 | 0.0000 |
| BACKBONE |         |         |         |      |    |        |        |
| 585 C    | 5.1108  | 17.7684 | -4.0591 | C.2  | 37 | SER278 | 0.0000 |
| BACKBONE |         |         |         |      |    |        |        |
| 586 O    | 4.1527  | 17.1685 | -3.5971 | O.2  | 37 | SER278 | 0.0000 |
| BACKBONE |         |         |         |      |    |        |        |
| 587 CB   | 5.4336  | 20.0384 | -3.0607 | C.3  | 37 | SER278 | 0.0000 |
| 588 OG   | 6.2991  | 20.7896 | -2.1932 | O.3  | 37 | SER278 | 0.0000 |
| 589 H    | 7.8396  | 19.4150 | -3.6920 | H    | 37 | SER278 | 0.0000 |
| 590 HA   | 5.8649  | 18.1511 | -2.1066 | H    | 37 | SER278 | 0.0000 |
| 591 HB3  | 4.3993  | 20.0457 | -2.6761 | H    | 37 | SER278 | 0.0000 |
| 592 HB2  | 5.4377  | 20.4712 | -4.0739 | H    | 37 | SER278 | 0.0000 |
| 593 HG   | 6.0378  | 21.7013 | -2.1118 | H    | 37 | SER278 | 0.0000 |
| 594 N    | 5.4499  | 17.7072 | -5.3692 | N.am | 38 | ALA279 | 0.0000 |
| BACKBONE |         |         |         |      |    |        |        |
| 595 CA   | 4.6924  | 16.8642 | -6.2947 | C.3  | 38 | ALA279 | 0.0000 |
| BACKBONE |         |         |         |      |    |        |        |
| 596 C    | 5.2091  | 15.4404 | -6.3317 | C.2  | 38 | ALA279 | 0.0000 |
| BACKBONE |         |         |         |      |    |        |        |
| 597 O    | 5.1375  | 14.8130 | -7.3770 | O.2  | 38 | ALA279 | 0.0000 |
| BACKBONE |         |         |         |      |    |        |        |
| 598 CB   | 4.6437  | 17.5241 | -7.6948 | C.3  | 38 | ALA279 | 0.0000 |
| 599 H    | 6.2453  | 18.2002 | -5.7237 | H    | 38 | ALA279 | 0.0000 |
| 600 HA   | 3.6474  | 16.7920 | -5.9710 | H    | 38 | ALA279 | 0.0000 |
| 601 HB3  | 5.6674  | 17.5805 | -8.0815 | H    | 38 | ALA279 | 0.0000 |
| 602 HB2  | 4.2339  | 18.5431 | -7.6157 | H    | 38 | ALA279 | 0.0000 |
| 603 HB1  | 4.0246  | 16.9508 | -8.4019 | H    | 38 | ALA279 | 0.0000 |
| 604 N    | 5.7106  | 14.8915 | -5.1987 | N.am | 39 | GLY280 | 0.0000 |
| BACKBONE |         |         |         |      |    |        |        |
| 605 CA   | 6.0410  | 13.4721 | -5.1489 | C.3  | 39 | GLY280 | 0.0000 |
| BACKBONE |         |         |         |      |    |        |        |
| 606 C    | 7.2757  | 13.0940 | -5.9274 | C.2  | 39 | GLY280 | 0.0000 |
| BACKBONE |         |         |         |      |    |        |        |
| 607 O    | 7.5195  | 11.9015 | -6.0152 | O.2  | 39 | GLY280 | 0.0000 |
| BACKBONE |         |         |         |      |    |        |        |
| 608 H    | 5.8295  | 15.4115 | -4.3540 | H    | 39 | GLY280 | 0.0000 |
| 609 HA2  | 5.1916  | 12.8906 | -5.5422 | H    | 39 | GLY280 | 0.0000 |
| 610 HA3  | 6.1835  | 13.1639 | -4.1025 | H    | 39 | GLY280 | 0.0000 |

|          |         |         |          |      |    |        |        |
|----------|---------|---------|----------|------|----|--------|--------|
| 611 N    | 8.0653  | 14.0359 | -6.4979  | N.am | 40 | PHE281 | 0.0000 |
| BACKBONE |         |         |          |      |    |        |        |
| 612 CA   | 9.1861  | 13.6341 | -7.3491  | C.3  | 40 | PHE281 | 0.0000 |
| BACKBONE |         |         |          |      |    |        |        |
| 613 C    | 10.5102 | 13.6698 | -6.6252  | C.2  | 40 | PHE281 | 0.0000 |
| BACKBONE |         |         |          |      |    |        |        |
| 614 O    | 10.6218 | 14.4174 | -5.6690  | O.2  | 40 | PHE281 | 0.0000 |
| BACKBONE |         |         |          |      |    |        |        |
| 615 CB   | 9.3064  | 14.5538 | -8.5845  | C.3  | 40 | PHE281 | 0.0000 |
| 616 CG   | 8.1145  | 14.4367 | -9.5415  | C.ar | 40 | PHE281 | 0.0000 |
| 617 CD1  | 7.8639  | 13.2392 | -10.2204 | C.ar | 40 | PHE281 | 0.0000 |
| 618 CD2  | 7.2786  | 15.5373 | -9.7586  | C.ar | 40 | PHE281 | 0.0000 |
| 619 CE1  | 6.8051  | 13.1489 | -11.1270 | C.ar | 40 | PHE281 | 0.0000 |
| 620 CE2  | 6.2156  | 15.4518 | -10.6602 | C.ar | 40 | PHE281 | 0.0000 |
| 621 CZ   | 5.9846  | 14.2578 | -11.3474 | C.ar | 40 | PHE281 | 0.0000 |
| 622 H    | 7.9081  | 15.0145 | -6.3581  | H    | 40 | PHE281 | 0.0000 |
| 623 HA   | 9.0269  | 12.6177 | -7.7218  | H    | 40 | PHE281 | 0.0000 |
| 624 HB3  | 10.2108 | 14.2982 | -9.1452  | H    | 40 | PHE281 | 0.0000 |
| 625 HB2  | 9.4202  | 15.5826 | -8.2289  | H    | 40 | PHE281 | 0.0000 |
| 626 HD1  | 8.4927  | 12.3721 | -10.0570 | H    | 40 | PHE281 | 0.0000 |
| 627 HD2  | 7.4562  | 16.4663 | -9.2325  | H    | 40 | PHE281 | 0.0000 |
| 628 HE1  | 6.6228  | 12.2230 | -11.6639 | H    | 40 | PHE281 | 0.0000 |
| 629 HE2  | 5.5772  | 16.3129 | -10.8274 | H    | 40 | PHE281 | 0.0000 |
| 630 HZ   | 5.1736  | 14.1900 | -12.0583 | H    | 40 | PHE281 | 0.0000 |
| 631 N    | 11.5194 | 12.8853 | -7.0833  | N.am | 41 | TYR282 | 0.0000 |
| BACKBONE |         |         |          |      |    |        |        |
| 632 CA   | 12.8259 | 12.8727 | -6.4259  | C.3  | 41 | TYR282 | 0.0000 |
| BACKBONE |         |         |          |      |    |        |        |
| 633 C    | 13.9311 | 12.6685 | -7.4470  | C.2  | 41 | TYR282 | 0.0000 |
| BACKBONE |         |         |          |      |    |        |        |
| 634 O    | 13.8049 | 11.7458 | -8.2337  | O.2  | 41 | TYR282 | 0.0000 |
| BACKBONE |         |         |          |      |    |        |        |
| 635 CB   | 12.8198 | 11.7865 | -5.3191  | C.3  | 41 | TYR282 | 0.0000 |
| 636 CG   | 12.6978 | 10.3544 | -5.8552  | C.ar | 41 | TYR282 | 0.0000 |
| 637 CD1  | 13.8345 | 9.5521  | -6.0079  | C.ar | 41 | TYR282 | 0.0000 |
| 638 CD2  | 11.4425 | 9.8286  | -6.1787  | C.ar | 41 | TYR282 | 0.0000 |
| 639 CE1  | 13.7121 | 8.2244  | -6.4297  | C.ar | 41 | TYR282 | 0.0000 |
| 640 CE2  | 11.3410 | 8.5481  | -6.7279  | C.ar | 41 | TYR282 | 0.0000 |
| 641 CZ   | 12.4678 | 7.7288  | -6.8318  | C.ar | 41 | TYR282 | 0.0000 |
| 642 OH   | 12.3290 | 6.4322  | -7.3368  | O.3  | 41 | TYR282 | 0.0000 |
| 643 H    | 11.3831 | 12.2697 | -7.8593  | H    | 41 | TYR282 | 0.0000 |
| 644 HA   | 12.9857 | 13.8373 | -5.9199  | H    | 41 | TYR282 | 0.0000 |
| 645 HB2  | 11.9655 | 11.9871 | -4.6612  | H    | 41 | TYR282 | 0.0000 |
| 646 HB3  | 13.7262 | 11.8519 | -4.7059  | H    | 41 | TYR282 | 0.0000 |
| 647 HD1  | 14.8202 | 9.9530  | -5.7943  | H    | 41 | TYR282 | 0.0000 |
| 648 HD2  | 10.5440 | 10.4130 | -6.0052  | H    | 41 | TYR282 | 0.0000 |
| 649 HE1  | 14.5867 | 7.5820  | -6.4421  | H    | 41 | TYR282 | 0.0000 |
| 650 HE2  | 10.3866 | 8.1817  | -7.0831  | H    | 41 | TYR282 | 0.0000 |
| 651 HH   | 13.1468 | 6.0480  | -7.6332  | H    | 41 | TYR282 | 0.0000 |
| 652 N    | 14.9952 | 13.5114 | -7.4692  | N.am | 42 | TYR283 | 0.0000 |
| BACKBONE |         |         |          |      |    |        |        |

|          |         |         |          |      |    |        |        |
|----------|---------|---------|----------|------|----|--------|--------|
| 653 CA   | 16.0571 | 13.3991 | -8.4779  | C.3  | 42 | TYR283 | 0.0000 |
| BACKBONE |         |         |          |      |    |        |        |
| 654 C    | 16.6789 | 12.0186 | -8.5288  | C.2  | 42 | TYR283 | 0.0000 |
| BACKBONE |         |         |          |      |    |        |        |
| 655 O    | 16.9600 | 11.4942 | -7.4630  | O.2  | 42 | TYR283 | 0.0000 |
| BACKBONE |         |         |          |      |    |        |        |
| 656 CB   | 17.1492 | 14.4728 | -8.1820  | C.3  | 42 | TYR283 | 0.0000 |
| 657 CG   | 18.3438 | 14.5807 | -9.1466  | C.ar | 42 | TYR283 | 0.0000 |
| 658 CD1  | 18.1590 | 14.6416 | -10.5319 | C.ar | 42 | TYR283 | 0.0000 |
| 659 CD2  | 19.6483 | 14.6647 | -8.6436  | C.ar | 42 | TYR283 | 0.0000 |
| 660 CE1  | 19.2310 | 14.9047 | -11.3893 | C.ar | 42 | TYR283 | 0.0000 |
| 661 CE2  | 20.7225 | 14.9325 | -9.4967  | C.ar | 42 | TYR283 | 0.0000 |
| 662 CZ   | 20.5141 | 15.1019 | -10.8669 | C.ar | 42 | TYR283 | 0.0000 |
| 663 OH   | 21.5890 | 15.4651 | -11.6833 | O.3  | 42 | TYR283 | 0.0000 |
| 664 H    | 15.0399 | 14.2824 | -6.8340  | H    | 42 | TYR283 | 0.0000 |
| 665 HA   | 15.5886 | 13.6299 | -9.4395  | H    | 42 | TYR283 | 0.0000 |
| 666 HB2  | 17.5131 | 14.3047 | -7.1577  | H    | 42 | TYR283 | 0.0000 |
| 667 HB3  | 16.6820 | 15.4672 | -8.2063  | H    | 42 | TYR283 | 0.0000 |
| 668 HD1  | 17.1771 | 14.5013 | -10.9554 | H    | 42 | TYR283 | 0.0000 |
| 669 HD2  | 19.8399 | 14.5345 | -7.5838  | H    | 42 | TYR283 | 0.0000 |
| 670 HE1  | 19.0583 | 14.9593 | -12.4578 | H    | 42 | TYR283 | 0.0000 |
| 671 HE2  | 21.7275 | 15.0151 | -9.0982  | H    | 42 | TYR283 | 0.0000 |
| 672 HH   | 21.3374 | 15.7131 | -12.5662 | H    | 42 | TYR283 | 0.0000 |
| 673 N    | 16.8991 | 11.4316 | -9.7377  | N.am | 43 | VAL284 | 0.0000 |
| BACKBONE |         |         |          |      |    |        |        |
| 674 CA   | 17.5565 | 10.1251 | -9.8625  | C.3  | 43 | VAL284 | 0.0000 |
| BACKBONE |         |         |          |      |    |        |        |
| 675 C    | 18.7612 | 10.1008 | -10.7903 | C.2  | 43 | VAL284 | 0.0000 |
| BACKBONE |         |         |          |      |    |        |        |
| 676 O    | 19.4770 | 9.1138  | -10.7100 | O.2  | 43 | VAL284 | 0.0000 |
| BACKBONE |         |         |          |      |    |        |        |
| 677 CB   | 16.5584 | 8.9997  | -10.2819 | C.3  | 43 | VAL284 | 0.0000 |
| 678 CG1  | 15.4319 | 8.8341  | -9.2291  | C.3  | 43 | VAL284 | 0.0000 |
| 679 CG2  | 15.9449 | 9.2204  | -11.6922 | C.3  | 43 | VAL284 | 0.0000 |
| 680 H    | 16.5864 | 11.8712 | -10.5764 | H    | 43 | VAL284 | 0.0000 |
| 681 HA   | 17.9759 | 9.8327  | -8.8851  | H    | 43 | VAL284 | 0.0000 |
| 682 HB   | 17.1139 | 8.0446  | -10.3118 | H    | 43 | VAL284 | 0.0000 |
| 683 HG13 | 15.8716 | 8.7004  | -8.2300  | H    | 43 | VAL284 | 0.0000 |
| 684 HG12 | 14.8087 | 7.9557  | -9.4583  | H    | 43 | VAL284 | 0.0000 |
| 685 HG11 | 14.7877 | 9.7219  | -9.2171  | H    | 43 | VAL284 | 0.0000 |
| 686 HG23 | 15.3004 | 10.1098 | -11.7120 | H    | 43 | VAL284 | 0.0000 |
| 687 HG22 | 15.3318 | 8.3503  | -11.9745 | H    | 43 | VAL284 | 0.0000 |
| 688 HG21 | 16.7381 | 9.3383  | -12.4448 | H    | 43 | VAL284 | 0.0000 |
| 689 N    | 19.0576 | 11.0919 | -11.6698 | N.am | 44 | GLY285 | 0.0000 |
| BACKBONE |         |         |          |      |    |        |        |
| 690 CA   | 20.2497 | 10.9662 | -12.5105 | C.3  | 44 | GLY285 | 0.0000 |
| BACKBONE |         |         |          |      |    |        |        |
| 691 C    | 20.2833 | 11.9417 | -13.6624 | C.2  | 44 | GLY285 | 0.0000 |
| BACKBONE |         |         |          |      |    |        |        |
| 692 O    | 19.3311 | 12.6868 | -13.8282 | O.2  | 44 | GLY285 | 0.0000 |
| BACKBONE |         |         |          |      |    |        |        |
| 693 H    | 18.5213 | 11.9301 | -11.7550 | H    | 44 | GLY285 | 0.0000 |

|          |         |         |          |       |    |        |         |
|----------|---------|---------|----------|-------|----|--------|---------|
| 694 HA2  | 20.2952 | 9.9580  | -12.9529 | H     | 44 | GLY285 | 0.0000  |
| 695 HA3  | 21.1435 | 11.1219 | -11.8867 | H     | 44 | GLY285 | 0.0000  |
| 696 N    | 21.3769 | 11.9334 | -14.4657 | N.am  | 45 | ASN286 | 0.0000  |
| BACKBONE |         |         |          |       |    |        |         |
| 697 CA   | 21.4427 | 12.7772 | -15.6627 | C.3   | 45 | ASN286 | 0.0000  |
| BACKBONE |         |         |          |       |    |        |         |
| 698 C    | 21.1421 | 14.2228 | -15.3261 | C.2   | 45 | ASN286 | 0.0000  |
| BACKBONE |         |         |          |       |    |        |         |
| 699 O    | 21.1410 | 14.5510 | -14.1510 | O.2   | 45 | ASN286 | 0.0000  |
| BACKBONE |         |         |          |       |    |        |         |
| 700 CB   | 20.5196 | 12.1149 | -16.7224 | C.3   | 45 | ASN286 | 0.0000  |
| 701 CG   | 20.9413 | 10.6819 | -16.9637 | C.2   | 45 | ASN286 | 0.0000  |
| 702 OD1  | 22.1349 | 10.4297 | -17.0473 | O.2   | 45 | ASN286 | 0.0000  |
| 703 ND2  | 20.0079 | 9.7146  | -17.0919 | N.am  | 45 | ASN286 | 0.0000  |
| 704 H    | 22.1367 | 11.3029 | -14.2874 | H     | 45 | ASN286 | 0.0000  |
| 705 HA   | 22.4734 | 12.7867 | -16.0567 | H     | 45 | ASN286 | 0.0000  |
| 706 HB3  | 20.5790 | 12.6243 | -17.6950 | H     | 45 | ASN286 | 0.0000  |
| 707 HB2  | 19.4828 | 12.1775 | -16.3675 | H     | 45 | ASN286 | 0.0000  |
| 708 HD21 | 19.0327 | 9.9179  | -17.0250 | H     | 45 | ASN286 | 0.0000  |
| 709 HD22 | 20.2920 | 8.7690  | -17.2577 | H     | 45 | ASN286 | 0.0000  |
| 710 N    | 20.9126 | 15.1245 | -16.3086 | N.am  | 46 | SER287 | 0.0000  |
| BACKBONE |         |         |          |       |    |        |         |
| 711 CA   | 20.6962 | 16.5277 | -15.9648 | C.3   | 46 | SER287 | 0.0000  |
| BACKBONE |         |         |          |       |    |        |         |
| 712 C    | 19.5293 | 16.6899 | -15.0194 | C.2   | 46 | SER287 | 0.0000  |
| BACKBONE |         |         |          |       |    |        |         |
| 713 O    | 19.6859 | 17.3606 | -14.0106 | O.2   | 46 | SER287 | 0.0000  |
| BACKBONE |         |         |          |       |    |        |         |
| 714 CB   | 20.4321 | 17.3909 | -17.2255 | C.3   | 46 | SER287 | 0.0000  |
| 715 OG   | 21.5471 | 17.2418 | -18.1200 | O.3   | 46 | SER287 | 0.0000  |
| 716 H    | 20.9373 | 14.8751 | -17.2763 | H     | 46 | SER287 | 0.0000  |
| 717 HA   | 21.6161 | 16.9068 | -15.4871 | H     | 46 | SER287 | 0.0000  |
| 718 HB3  | 20.3161 | 18.4485 | -16.9315 | H     | 46 | SER287 | 0.0000  |
| 719 HB2  | 19.5061 | 17.0586 | -17.7240 | H     | 46 | SER287 | 0.0000  |
| 720 HG   | 21.4463 | 17.7506 | -18.9184 | H     | 46 | SER287 | 0.0000  |
| 721 N    | 18.3523 | 16.1010 | -15.3384 | N.am  | 47 | ASP288 | 0.0000  |
| BACKBONE |         |         |          |       |    |        |         |
| 722 CA   | 17.1554 | 16.3938 | -14.5533 | C.3   | 47 | ASP288 | 0.0000  |
| BACKBONE |         |         |          |       |    |        |         |
| 723 C    | 16.1836 | 15.2365 | -14.5303 | C.2   | 47 | ASP288 | 0.0000  |
| BACKBONE |         |         |          |       |    |        |         |
| 724 O    | 14.9884 | 15.4697 | -14.6118 | O.2   | 47 | ASP288 | 0.0000  |
| BACKBONE |         |         |          |       |    |        |         |
| 725 CB   | 16.5340 | 17.6826 | -15.1586 | C.3   | 47 | ASP288 | 0.0000  |
| 726 CG   | 16.0895 | 17.5126 | -16.5889 | C.2   | 47 | ASP288 | 0.0000  |
| 727 OD1  | 16.2809 | 16.4089 | -17.1676 | O.co2 | 47 | ASP288 | -0.5000 |
| 728 OD2  | 15.5373 | 18.4967 | -17.1524 | O.co2 | 47 | ASP288 | -0.5000 |
| 729 H    | 18.2524 | 15.5395 | -16.1626 | H     | 47 | ASP288 | 0.0000  |
| 730 HA   | 17.4155 | 16.5852 | -13.5012 | H     | 47 | ASP288 | 0.0000  |
| 731 HB3  | 17.2896 | 18.4820 | -15.1327 | H     | 47 | ASP288 | 0.0000  |
| 732 HB2  | 15.6694 | 18.0126 | -14.5663 | H     | 47 | ASP288 | 0.0000  |

|          |         |         |          |       |    |        |         |
|----------|---------|---------|----------|-------|----|--------|---------|
| 733 N    | 16.6682 | 13.9783 | -14.4138 | N.am  | 48 | ASP289 | 0.0000  |
| BACKBONE |         |         |          |       |    |        |         |
| 734 CA   | 15.7423 | 12.8493 | -14.3821 | C.3   | 48 | ASP289 | 0.0000  |
| BACKBONE |         |         |          |       |    |        |         |
| 735 C    | 15.1501 | 12.7339 | -13.0020 | C.2   | 48 | ASP289 | 0.0000  |
| BACKBONE |         |         |          |       |    |        |         |
| 736 O    | 15.9292 | 12.7504 | -12.0650 | O.2   | 48 | ASP289 | 0.0000  |
| BACKBONE |         |         |          |       |    |        |         |
| 737 CB   | 16.4249 | 11.4919 | -14.6978 | C.3   | 48 | ASP289 | 0.0000  |
| 738 CG   | 16.8740 | 11.4061 | -16.1296 | C.2   | 48 | ASP289 | 0.0000  |
| 739 OD1  | 16.9482 | 12.4601 | -16.8167 | O.co2 | 48 | ASP289 | -0.5000 |
| 740 OD2  | 17.1601 | 10.2671 | -16.5838 | O.co2 | 48 | ASP289 | -0.5000 |
| 741 H    | 17.6487 | 13.8008 | -14.3165 | H     | 48 | ASP289 | 0.0000  |
| 742 HA   | 14.9569 | 13.0123 | -15.1355 | H     | 48 | ASP289 | 0.0000  |
| 743 HB3  | 15.7240 | 10.6670 | -14.5087 | H     | 48 | ASP289 | 0.0000  |
| 744 HB2  | 17.2867 | 11.3318 | -14.0369 | H     | 48 | ASP289 | 0.0000  |
| 745 N    | 13.8116 | 12.5939 | -12.8546 | N.am  | 49 | VAL290 | 0.0000  |
| BACKBONE |         |         |          |       |    |        |         |
| 746 CA   | 13.2170 | 12.3778 | -11.5370 | C.3   | 49 | VAL290 | 0.0000  |
| BACKBONE |         |         |          |       |    |        |         |
| 747 C    | 12.2974 | 11.1817 | -11.6249 | C.2   | 49 | VAL290 | 0.0000  |
| BACKBONE |         |         |          |       |    |        |         |
| 748 O    | 11.9467 | 10.8179 | -12.7362 | O.2   | 49 | VAL290 | 0.0000  |
| BACKBONE |         |         |          |       |    |        |         |
| 749 CB   | 12.4280 | 13.6381 | -11.0697 | C.3   | 49 | VAL290 | 0.0000  |
| 750 CG1  | 13.2401 | 14.9432 | -11.2861 | C.3   | 49 | VAL290 | 0.0000  |
| 751 CG2  | 11.0597 | 13.7679 | -11.7938 | C.3   | 49 | VAL290 | 0.0000  |
| 752 H    | 13.1937 | 12.6214 | -13.6407 | H     | 49 | VAL290 | 0.0000  |
| 753 HA   | 13.9893 | 12.1451 | -10.7887 | H     | 49 | VAL290 | 0.0000  |
| 754 HB   | 12.2444 | 13.5293 | -9.9882  | H     | 49 | VAL290 | 0.0000  |
| 755 HG13 | 14.1946 | 14.8916 | -10.7528 | H     | 49 | VAL290 | 0.0000  |
| 756 HG12 | 12.6802 | 15.8062 | -10.8971 | H     | 49 | VAL290 | 0.0000  |
| 757 HG11 | 13.4435 | 15.1155 | -12.3530 | H     | 49 | VAL290 | 0.0000  |
| 758 HG23 | 11.2139 | 13.7963 | -12.8783 | H     | 49 | VAL290 | 0.0000  |
| 759 HG22 | 10.5513 | 14.6952 | -11.4926 | H     | 49 | VAL290 | 0.0000  |
| 760 HG21 | 10.3957 | 12.9239 | -11.5603 | H     | 49 | VAL290 | 0.0000  |
| 761 N    | 11.8758 | 10.5884 | -10.4818 | N.am  | 50 | LYS291 | 0.0000  |
| BACKBONE |         |         |          |       |    |        |         |
| 762 CA   | 10.8151 | 9.5753  | -10.4985 | C.3   | 50 | LYS291 | 0.0000  |
| BACKBONE |         |         |          |       |    |        |         |
| 763 C    | 9.7694  | 9.9352  | -9.4684  | C.2   | 50 | LYS291 | 0.0000  |
| BACKBONE |         |         |          |       |    |        |         |
| 764 O    | 10.1208 | 10.6236 | -8.5255  | O.2   | 50 | LYS291 | 0.0000  |
| BACKBONE |         |         |          |       |    |        |         |
| 765 CB   | 11.3489 | 8.1447  | -10.2034 | C.3   | 50 | LYS291 | 0.0000  |
| 766 CG   | 11.8603 | 7.4005  | -11.4655 | C.3   | 50 | LYS291 | 0.0000  |
| 767 CD   | 12.2849 | 5.9517  | -11.0886 | C.3   | 50 | LYS291 | 0.0000  |
| 768 CE   | 12.7656 | 5.1607  | -12.3319 | C.3   | 50 | LYS291 | 0.0000  |
| 769 O    | 9.6486  | 11.7494 | -19.5934 | O.2   | 50 | LYS291 | 0.0000  |
| BACKBONE |         |         |          |       |    |        |         |
| 770 C    | 8.7718  | 11.7794 | -20.4409 | C.2   | 50 | LYS291 | 0.0000  |
| BACKBONE |         |         |          |       |    |        |         |

|          |         |         |          |      |    |        |        |
|----------|---------|---------|----------|------|----|--------|--------|
| 771 N    | 7.8539  | 10.7748 | -20.5197 | N.am | 50 | LYS291 | 0.0000 |
| BACKBONE |         |         |          |      |    |        |        |
| 772 C    | 8.0246  | 9.5614  | -19.7304 | C.3  | 50 | LYS291 | 0.0000 |
| BACKBONE |         |         |          |      |    |        |        |
| 773 H    | 7.7623  | 9.7833  | -18.6861 | H    | 50 | LYS291 | 0.0000 |
| 774 C    | 9.4062  | 8.9691  | -19.9031 | C.2  | 50 | LYS291 | 0.0000 |
| BACKBONE |         |         |          |      |    |        |        |
| 775 N    | 10.2454 | 8.9874  | -18.8457 | N.am | 50 | LYS291 | 0.0000 |
| BACKBONE |         |         |          |      |    |        |        |
| 776 H    | 9.9429  | 9.3341  | -17.9596 | H    | 50 | LYS291 | 0.0000 |
| 777 C    | 11.6303 | 8.5438  | -19.0041 | C.3  | 50 | LYS291 | 0.0000 |
| BACKBONE |         |         |          |      |    |        |        |
| 778 H    | 12.1275 | 9.1070  | -19.8104 | H    | 50 | LYS291 | 0.0000 |
| 779 C    | 12.3240 | 8.8115  | -17.6808 | C.ar | 50 | LYS291 | 0.0000 |
| BACKBONE |         |         |          |      |    |        |        |
| 780 C    | 12.4745 | 7.6445  | -16.9446 | C.ar | 50 | LYS291 | 0.0000 |
| BACKBONE |         |         |          |      |    |        |        |
| 781 C    | 12.0000 | 6.4177  | -17.7035 | C.3  | 50 | LYS291 | 0.0000 |
| BACKBONE |         |         |          |      |    |        |        |
| 782 H    | 12.7406 | 5.6006  | -17.6585 | H    | 50 | LYS291 | 0.0000 |
| 783 H    | 11.0523 | 6.0855  | -17.2487 | H    | 50 | LYS291 | 0.0000 |
| 784 C    | 11.7929 | 6.9980  | -19.1348 | C.3  | 50 | LYS291 | 0.0000 |
| BACKBONE |         |         |          |      |    |        |        |
| 785 H    | 12.7069 | 6.8008  | -19.7224 | H    | 50 | LYS291 | 0.0000 |
| 786 H    | 10.9390 | 6.5257  | -19.6466 | H    | 50 | LYS291 | 0.0000 |
| 787 C    | 12.9715 | 7.6887  | -15.6441 | C.ar | 50 | LYS291 | 0.0000 |
| BACKBONE |         |         |          |      |    |        |        |
| 788 C    | 13.4165 | 8.9091  | -15.1311 | C.ar | 50 | LYS291 | 0.0000 |
| BACKBONE |         |         |          |      |    |        |        |
| 789 H    | 13.8403 | 8.9366  | -14.1355 | H    | 50 | LYS291 | 0.0000 |
| 790 C    | 13.2870 | 10.0806 | -15.8895 | C.ar | 50 | LYS291 | 0.0000 |
| BACKBONE |         |         |          |      |    |        |        |
| 791 H    | 13.5951 | 11.0294 | -15.4748 | H    | 50 | LYS291 | 0.0000 |
| 792 C    | 12.7408 | 10.0424 | -17.1773 | C.ar | 50 | LYS291 | 0.0000 |
| BACKBONE |         |         |          |      |    |        |        |
| 793 H    | 12.6142 | 10.9441 | -17.7684 | H    | 50 | LYS291 | 0.0000 |
| 794 O    | 12.9586 | 6.5469  | -14.8560 | O.3  | 50 | LYS291 | 0.0000 |
| BACKBONE |         |         |          |      |    |        |        |
| 795 S    | 14.2612 | 5.9186  | -14.4650 | S.o2 | 50 | LYS291 | 0.0000 |
| 796 O    | 14.2759 | 4.5912  | -15.0415 | O.2  | 50 | LYS291 | 0.0000 |
| BACKBONE |         |         |          |      |    |        |        |
| 797 O    | 15.3833 | 6.8191  | -14.6597 | O.2  | 50 | LYS291 | 0.0000 |
| BACKBONE |         |         |          |      |    |        |        |
| 798 N1   | 13.9656 | 5.8012  | -12.8623 | N.am | 50 | LYS291 | 0.0000 |
| 799 O    | 9.7341  | 8.5062  | -20.9847 | O.2  | 50 | LYS291 | 0.0000 |
| BACKBONE |         |         |          |      |    |        |        |
| 800 C    | 6.9181  | 8.6611  | -20.3320 | C.3  | 50 | LYS291 | 0.0000 |
| BACKBONE |         |         |          |      |    |        |        |
| 801 H    | 7.2717  | 8.1421  | -21.2377 | H    | 50 | LYS291 | 0.0000 |
| 802 H    | 6.5454  | 7.9104  | -19.6157 | H    | 50 | LYS291 | 0.0000 |
| 803 C    | 5.8454  | 9.6859  | -20.7531 | C.3  | 50 | LYS291 | 0.0000 |
| BACKBONE |         |         |          |      |    |        |        |



|          |         |         |               |    |        |        |
|----------|---------|---------|---------------|----|--------|--------|
| 804 H    | 5.3355  | 10.0359 | -19.8402 H    | 50 | LYS291 | 0.0000 |
| 805 H    | 5.0982  | 9.2705  | -21.4470 H    | 50 | LYS291 | 0.0000 |
| 806 C    | 6.6718  | 10.8425 | -21.3659 C.3  | 50 | LYS291 | 0.0000 |
| BACKBONE |         |         |               |    |        |        |
| 807 H    | 6.1120  | 11.7837 | -21.2774 H    | 50 | LYS291 | 0.0000 |
| 808 H    | 6.9416  | 10.6420 | -22.4138 H    | 50 | LYS291 | 0.0000 |
| 809 C    | 8.8181  | 12.9704 | -21.3814 C.3  | 50 | LYS291 | 0.0000 |
| BACKBONE |         |         |               |    |        |        |
| 810 H    | 7.8751  | 13.0541 | -21.9379 H    | 50 | LYS291 | 0.0000 |
| 811 N    | 8.9666  | 14.2093 | -20.5997 N.am | 50 | LYS291 | 0.0000 |
| BACKBONE |         |         |               |    |        |        |
| 812 H    | 9.8674  | 14.4532 | -20.2470 H    | 50 | LYS291 | 0.0000 |
| 813 C    | 7.9079  | 15.0274 | -20.3642 C.2  | 50 | LYS291 | 0.0000 |
| BACKBONE |         |         |               |    |        |        |
| 814 C    | 8.1306  | 16.4153 | -19.7929 C.3  | 50 | LYS291 | 0.0000 |
| BACKBONE |         |         |               |    |        |        |
| 815 H    | 8.9261  | 16.8989 | -20.3850 H    | 50 | LYS291 | 0.0000 |
| 816 N    | 6.8817  | 17.2110 | -19.9065 N.3  | 50 | LYS291 | 0.0000 |
| BACKBONE |         |         |               |    |        |        |
| 817 H    | 6.8998  | 18.0636 | -19.2370 H    | 50 | LYS291 | 0.0000 |
| 818 C    | 6.5033  | 17.6553 | -21.2660 C.3  | 50 | LYS291 | 0.0000 |
| BACKBONE |         |         |               |    |        |        |
| 819 H    | 7.2109  | 18.4128 | -21.6385 H    | 50 | LYS291 | 0.0000 |
| 820 H    | 6.4839  | 16.8146 | -21.9744 H    | 50 | LYS291 | 0.0000 |
| 821 H    | 5.4954  | 18.0982 | -21.2319 H    | 50 | LYS291 | 0.0000 |
| 822 C    | 8.5908  | 16.3732 | -18.3133 C.3  | 50 | LYS291 | 0.0000 |
| BACKBONE |         |         |               |    |        |        |
| 823 H    | 7.7600  | 16.0405 | -17.6757 H    | 50 | LYS291 | 0.0000 |
| 824 H    | 9.4404  | 15.6898 | -18.1954 H    | 50 | LYS291 | 0.0000 |
| 825 H    | 8.9052  | 17.3728 | -17.9736 H    | 50 | LYS291 | 0.0000 |
| 826 O    | 6.7616  | 14.6961 | -20.6176 O.2  | 50 | LYS291 | 0.0000 |
| BACKBONE |         |         |               |    |        |        |
| 827 C    | 9.9124  | 12.7752 | -22.5012 C.3  | 50 | LYS291 | 0.0000 |
| BACKBONE |         |         |               |    |        |        |
| 828 H    | 9.3995  | 12.5362 | -23.4514 H    | 50 | LYS291 | 0.0000 |
| 829 C    | 10.7590 | 14.0544 | -22.7637 C.3  | 50 | LYS291 | 0.0000 |
| BACKBONE |         |         |               |    |        |        |
| 830 H    | 10.0960 | 14.9160 | -22.9475 H    | 50 | LYS291 | 0.0000 |
| 831 H    | 11.3945 | 14.2733 | -21.8930 H    | 50 | LYS291 | 0.0000 |
| 832 C    | 11.7175 | 13.8673 | -23.9686 C.3  | 50 | LYS291 | 0.0000 |
| BACKBONE |         |         |               |    |        |        |
| 833 H    | 12.3022 | 14.7892 | -24.1252 H    | 50 | LYS291 | 0.0000 |
| 834 H    | 11.1356 | 13.6765 | -24.8849 H    | 50 | LYS291 | 0.0000 |
| 835 C    | 12.6804 | 12.6828 | -23.6990 C.3  | 50 | LYS291 | 0.0000 |
| BACKBONE |         |         |               |    |        |        |
| 836 H    | 13.3042 | 12.9029 | -22.8177 H    | 50 | LYS291 | 0.0000 |
| 837 H    | 13.3505 | 12.5399 | -24.5632 H    | 50 | LYS291 | 0.0000 |
| 838 C    | 11.8659 | 11.3896 | -23.4463 C.3  | 50 | LYS291 | 0.0000 |
| BACKBONE |         |         |               |    |        |        |
| 839 H    | 12.5533 | 10.5547 | -23.2293 H    | 50 | LYS291 | 0.0000 |
| 840 H    | 11.3010 | 11.1317 | -24.3575 H    | 50 | LYS291 | 0.0000 |

|          |         |         |          |      |    |        |        |
|----------|---------|---------|----------|------|----|--------|--------|
| 841 C    | 10.8837 | 11.5817 | -22.2596 | C.3  | 50 | LYS291 | 0.0000 |
| BACKBONE |         |         |          |      |    |        |        |
| 842 H    | 11.4631 | 11.7442 | -21.3381 | H    | 50 | LYS291 | 0.0000 |
| 843 H    | 10.3122 | 10.6472 | -22.1574 | H    | 50 | LYS291 | 0.0000 |
| 844 H    | 12.2508 | 10.8508 | -9.5910  | H    | 50 | LYS291 | 0.0000 |
| 845 HA   | 10.2763 | 9.5809  | -11.4522 | H    | 50 | LYS291 | 0.0000 |
| 846 HB3  | 10.5294 | 7.5369  | -9.7830  | H    | 50 | LYS291 | 0.0000 |
| 847 HB2  | 12.1562 | 8.2186  | -9.4555  | H    | 50 | LYS291 | 0.0000 |
| 848 HG3  | 12.7001 | 7.9698  | -11.8969 | H    | 50 | LYS291 | 0.0000 |
| 849 HG2  | 11.0523 | 7.3482  | -12.2116 | H    | 50 | LYS291 | 0.0000 |
| 850 HD3  | 11.4451 | 5.4050  | -10.6270 | H    | 50 | LYS291 | 0.0000 |
| 851 HD2  | 13.1101 | 5.9839  | -10.3555 | H    | 50 | LYS291 | 0.0000 |
| 852 HE3  | 11.9695 | 5.1118  | -13.0950 | H    | 50 | LYS291 | 0.0000 |
| 853 HE2  | 13.0121 | 4.1288  | -12.0289 | H    | 50 | LYS291 | 0.0000 |
| 854 N    | 8.5075  | 9.4606  | -9.6270  | N.am | 51 | CYS292 | 0.0000 |
| BACKBONE |         |         |          |      |    |        |        |
| 855 CA   | 7.4843  | 9.7207  | -8.6174  | C.3  | 51 | CYS292 | 0.0000 |
| BACKBONE |         |         |          |      |    |        |        |
| 856 C    | 7.6448  | 8.6545  | -7.5618  | C.2  | 51 | CYS292 | 0.0000 |
| BACKBONE |         |         |          |      |    |        |        |
| 857 O    | 7.7152  | 7.4963  | -7.9392  | O.2  | 51 | CYS292 | 0.0000 |
| BACKBONE |         |         |          |      |    |        |        |
| 858 CB   | 6.0619  | 9.6385  | -9.2246  | C.3  | 51 | CYS292 | 0.0000 |
| 859 SG   | 4.7723  | 10.0362 | -8.0060  | S.3  | 51 | CYS292 | 0.0000 |
| 860 H    | 8.2647  | 8.8776  | -10.4072 | H    | 51 | CYS292 | 0.0000 |
| 861 HA   | 7.5970  | 10.7355 | -8.2135  | H    | 51 | CYS292 | 0.0000 |
| 862 HB3  | 5.8919  | 8.6113  | -9.5581  | H    | 51 | CYS292 | 0.0000 |
| 863 HB2  | 5.9618  | 10.3216 | -10.0808 | H    | 51 | CYS292 | 0.0000 |
| 864 LPG2 | 4.8227  | 10.6761 | -7.7845  | LP   | 51 | CYS292 | 0.0000 |
| 865 LPG1 | 4.7855  | 9.6115  | -7.4763  | LP   | 51 | CYS292 | 0.0000 |
| 866 N    | 7.7116  | 8.9824  | -6.2519  | N.am | 52 | PHE293 | 0.0000 |
| BACKBONE |         |         |          |      |    |        |        |
| 867 CA   | 7.8777  | 7.9211  | -5.2590  | C.3  | 52 | PHE293 | 0.0000 |
| BACKBONE |         |         |          |      |    |        |        |
| 868 C    | 6.7475  | 6.9279  | -5.3625  | C.2  | 52 | PHE293 | 0.0000 |
| BACKBONE |         |         |          |      |    |        |        |
| 869 O    | 7.0009  | 5.7363  | -5.2749  | O.2  | 52 | PHE293 | 0.0000 |
| BACKBONE |         |         |          |      |    |        |        |
| 870 CB   | 7.9868  | 8.4324  | -3.7971  | C.3  | 52 | PHE293 | 0.0000 |
| 871 CG   | 6.6319  | 8.8099  | -3.1747  | C.ar | 52 | PHE293 | 0.0000 |
| 872 CD1  | 5.9511  | 7.8899  | -2.3697  | C.ar | 52 | PHE293 | 0.0000 |
| 873 CD2  | 6.0561  | 10.0661 | -3.3840  | C.ar | 52 | PHE293 | 0.0000 |
| 874 CE1  | 4.6964  | 8.1977  | -1.8347  | C.ar | 52 | PHE293 | 0.0000 |
| 875 CE2  | 4.8488  | 10.4157 | -2.7762  | C.ar | 52 | PHE293 | 0.0000 |
| 876 CZ   | 4.1628  | 9.4780  | -2.0010  | C.ar | 52 | PHE293 | 0.0000 |
| 877 H    | 7.6711  | 9.9354  | -5.9532  | H    | 52 | PHE293 | 0.0000 |
| 878 HA   | 8.8215  | 7.3999  | -5.4896  | H    | 52 | PHE293 | 0.0000 |
| 879 HB3  | 8.6865  | 9.2799  | -3.7681  | H    | 52 | PHE293 | 0.0000 |
| 880 HB2  | 8.4176  | 7.6277  | -3.1826  | H    | 52 | PHE293 | 0.0000 |
| 881 HD1  | 6.4028  | 6.9324  | -2.1513  | H    | 52 | PHE293 | 0.0000 |
| 882 HD2  | 6.5478  | 10.7817 | -4.0219  | H    | 52 | PHE293 | 0.0000 |
| 883 HE1  | 4.1333  | 7.4484  | -1.2890  | H    | 52 | PHE293 | 0.0000 |

|          |        |         |                |           |         |
|----------|--------|---------|----------------|-----------|---------|
| 884 HE2  | 4.4450 | 11.4149 | -2.9060 H      | 52 PHE293 | 0.0000  |
| 885 HZ   | 3.2213 | 9.7364  | -1.5285 H      | 52 PHE293 | 0.0000  |
| 886 N    | 5.4939 | 7.4048  | -5.5416 N.am   | 53 CYS294 | 0.0000  |
| BACKBONE |        |         |                |           |         |
| 887 CA   | 4.3661 | 6.4827  | -5.5409 C.3    | 53 CYS294 | 0.0000  |
| BACKBONE |        |         |                |           |         |
| 888 C    | 4.2285 | 5.7704  | -6.8701 C.2    | 53 CYS294 | 0.0000  |
| BACKBONE |        |         |                |           |         |
| 889 O    | 4.3589 | 4.5563  | -6.9013 O.2    | 53 CYS294 | 0.0000  |
| BACKBONE |        |         |                |           |         |
| 890 CB   | 3.0536 | 7.1874  | -5.1127 C.3    | 53 CYS294 | 0.0000  |
| 891 SG   | 1.7244 | 5.9482  | -4.9567 S.o    | 53 CYS294 | 0.0000  |
| 892 H    | 5.3118 | 8.3829  | -5.6501 H      | 53 CYS294 | 0.0000  |
| 893 HA   | 4.5612 | 5.7469  | -4.7507 H      | 53 CYS294 | 0.0000  |
| 894 HB3  | 2.7536 | 7.9612  | -5.8341 H      | 53 CYS294 | 0.0000  |
| 895 HB2  | 3.2148 | 7.6629  | -4.1336 H      | 53 CYS294 | 0.0000  |
| 896 LPG2 | 1.9148 | 5.4136  | -4.5838 LP     | 53 CYS294 | 0.0000  |
| 897 LPG1 | 1.5011 | 5.7344  | -5.5612 LP     | 53 CYS294 | 0.0000  |
| 898 HG   | 1.0453 | 6.5209  | -4.4812 H      | 53 CYS294 | 0.0000  |
| 899 N    | 3.9542 | 6.5055  | -7.9746 N.am   | 54 CYS295 | 0.0000  |
| BACKBONE |        |         |                |           |         |
| 900 CA   | 3.7044 | 5.8714  | -9.2702 C.3    | 54 CYS295 | 0.0000  |
| BACKBONE |        |         |                |           |         |
| 901 C    | 4.9495 | 5.4898  | -10.0407 C.2   | 54 CYS295 | 0.0000  |
| BACKBONE |        |         |                |           |         |
| 902 O    | 4.7902 | 4.9084  | -11.1024 O.2   | 54 CYS295 | 0.0000  |
| BACKBONE |        |         |                |           |         |
| 903 CB   | 2.7646 | 6.7452  | -10.1525 C.3   | 54 CYS295 | 0.0000  |
| 904 SG   | 3.4446 | 8.3566  | -10.7135 S.3   | 54 CYS295 | 0.0000  |
| 905 H    | 3.9032 | 7.4969  | -7.9197 H      | 54 CYS295 | 0.0000  |
| 906 HA   | 3.1589 | 4.9282  | -9.0899 H      | 54 CYS295 | 0.0000  |
| 907 HB3  | 1.8322 | 6.8992  | -9.6007 H      | 54 CYS295 | 0.0000  |
| 908 HB2  | 2.5132 | 6.1935  | -11.0722 H     | 54 CYS295 | 0.0000  |
| 909 LPG2 | 3.1403 | 8.5500  | -11.2889 LP    | 54 CYS295 | 0.0000  |
| 910 LPG1 | 4.1133 | 8.3033  | -10.8180 LP    | 54 CYS295 | 0.0000  |
| 911 N    | 6.1829 | 5.7912  | -9.5705 N.am   | 55 ASP296 | 0.0000  |
| BACKBONE |        |         |                |           |         |
| 912 CA   | 7.3837 | 5.4048  | -10.3218 C.3   | 55 ASP296 | 0.0000  |
| BACKBONE |        |         |                |           |         |
| 913 C    | 7.4298 | 5.9491  | -11.7358 C.2   | 55 ASP296 | 0.0000  |
| BACKBONE |        |         |                |           |         |
| 914 O    | 8.2524 | 5.4824  | -12.5081 O.2   | 55 ASP296 | 0.0000  |
| BACKBONE |        |         |                |           |         |
| 915 CB   | 7.5111 | 3.8571  | -10.3251 C.3   | 55 ASP296 | 0.0000  |
| 916 CG   | 8.9281 | 3.4041  | -10.5732 C.2   | 55 ASP296 | 0.0000  |
| 917 OD1  | 9.7554 | 3.5078  | -9.6268 O.co2  | 55 ASP296 | -0.5000 |
| 918 OD2  | 9.2273 | 2.9399  | -11.7070 O.co2 | 55 ASP296 | -0.5000 |
| 919 H    | 6.3055 | 6.2587  | -8.6933 H      | 55 ASP296 | 0.0000  |
| 920 HA   | 8.2713 | 5.8147  | -9.8106 H      | 55 ASP296 | 0.0000  |
| 921 HB3  | 6.8363 | 3.4130  | -11.0735 H     | 55 ASP296 | 0.0000  |
| 922 HB2  | 7.2033 | 3.4817  | -9.3406 H      | 55 ASP296 | 0.0000  |

|          |         |         |          |      |    |        |        |
|----------|---------|---------|----------|------|----|--------|--------|
| 923 N    | 6.5735  | 6.9276  | -12.1110 | N.am | 56 | GLY297 | 0.0000 |
| BACKBONE |         |         |          |      |    |        |        |
| 924 CA   | 6.5981  | 7.4595  | -13.4666 | C.3  | 56 | GLY297 | 0.0000 |
| BACKBONE |         |         |          |      |    |        |        |
| 925 C    | 7.7811  | 8.3867  | -13.5717 | C.2  | 56 | GLY297 | 0.0000 |
| BACKBONE |         |         |          |      |    |        |        |
| 926 O    | 7.9218  | 9.2330  | -12.7027 | O.2  | 56 | GLY297 | 0.0000 |
| BACKBONE |         |         |          |      |    |        |        |
| 927 H    | 5.9286  | 7.3412  | -11.4778 | H    | 56 | GLY297 | 0.0000 |
| 928 HA2  | 5.6812  | 8.0356  | -13.6600 | H    | 56 | GLY297 | 0.0000 |
| 929 HA3  | 6.6322  | 6.6343  | -14.1952 | H    | 56 | GLY297 | 0.0000 |
| 930 N    | 8.6372  | 8.2403  | -14.6087 | N.am | 57 | GLY298 | 0.0000 |
| BACKBONE |         |         |          |      |    |        |        |
| 931 CA   | 9.8449  | 9.0535  | -14.6912 | C.3  | 57 | GLY298 | 0.0000 |
| BACKBONE |         |         |          |      |    |        |        |
| 932 C    | 9.6391  | 10.2700 | -15.5482 | C.2  | 57 | GLY298 | 0.0000 |
| BACKBONE |         |         |          |      |    |        |        |
| 933 O    | 8.8227  | 10.1714 | -16.4477 | O.2  | 57 | GLY298 | 0.0000 |
| BACKBONE |         |         |          |      |    |        |        |
| 934 H    | 8.4711  | 7.5766  | -15.3420 | H    | 57 | GLY298 | 0.0000 |
| 935 HA2  | 10.6258 | 8.4540  | -15.1663 | H    | 57 | GLY298 | 0.0000 |
| 936 HA3  | 10.2104 | 9.3289  | -13.7000 | H    | 57 | GLY298 | 0.0000 |
| 937 N    | 10.3684 | 11.3909 | -15.3232 | N.am | 58 | LEU299 | 0.0000 |
| BACKBONE |         |         |          |      |    |        |        |
| 938 CA   | 10.2351 | 12.5568 | -16.1985 | C.3  | 58 | LEU299 | 0.0000 |
| BACKBONE |         |         |          |      |    |        |        |
| 939 C    | 11.5682 | 13.2613 | -16.3535 | C.2  | 58 | LEU299 | 0.0000 |
| BACKBONE |         |         |          |      |    |        |        |
| 940 O    | 12.2856 | 13.3464 | -15.3695 | O.2  | 58 | LEU299 | 0.0000 |
| BACKBONE |         |         |          |      |    |        |        |
| 941 CB   | 9.2109  | 13.5738 | -15.6265 | C.3  | 58 | LEU299 | 0.0000 |
| 942 CG   | 7.7341  | 13.0840 | -15.5854 | C.3  | 58 | LEU299 | 0.0000 |
| 943 CD1  | 6.8587  | 14.1211 | -14.8246 | C.3  | 58 | LEU299 | 0.0000 |
| 944 CD2  | 7.1123  | 12.8330 | -16.9921 | C.3  | 58 | LEU299 | 0.0000 |
| 945 H    | 11.0071 | 11.4515 | -14.5538 | H    | 58 | LEU299 | 0.0000 |
| 946 HA   | 9.9223  | 12.2354 | -17.1978 | H    | 58 | LEU299 | 0.0000 |
| 947 HB3  | 9.2574  | 14.5145 | -16.1886 | H    | 58 | LEU299 | 0.0000 |
| 948 HB2  | 9.5341  | 13.7881 | -14.5992 | H    | 58 | LEU299 | 0.0000 |
| 949 HG   | 7.7346  | 12.1460 | -15.0101 | H    | 58 | LEU299 | 0.0000 |
| 950 HD13 | 7.2311  | 14.2569 | -13.7997 | H    | 58 | LEU299 | 0.0000 |
| 951 HD12 | 5.8093  | 13.7922 | -14.7657 | H    | 58 | LEU299 | 0.0000 |
| 952 HD11 | 6.8902  | 15.0947 | -15.3359 | H    | 58 | LEU299 | 0.0000 |
| 953 HD23 | 7.1223  | 13.7501 | -17.5950 | H    | 58 | LEU299 | 0.0000 |
| 954 HD22 | 6.0673  | 12.5057 | -16.8903 | H    | 58 | LEU299 | 0.0000 |
| 955 HD21 | 7.6394  | 12.0556 | -17.5561 | H    | 58 | LEU299 | 0.0000 |
| 956 N    | 11.9052 | 13.7769 | -17.5637 | N.am | 59 | ARG300 | 0.0000 |
| BACKBONE |         |         |          |      |    |        |        |
| 957 CA   | 13.1521 | 14.5195 | -17.7543 | C.3  | 59 | ARG300 | 0.0000 |
| BACKBONE |         |         |          |      |    |        |        |
| 958 C    | 12.9149 | 15.6495 | -18.7359 | C.2  | 59 | ARG300 | 0.0000 |
| BACKBONE |         |         |          |      |    |        |        |

|          |         |         |          |       |           |        |
|----------|---------|---------|----------|-------|-----------|--------|
| 959 O    | 11.7776 | 15.8258 | -19.1419 | O.2   | 59 ARG300 | 0.0000 |
| BACKBONE |         |         |          |       |           |        |
| 960 CB   | 14.2820 | 13.5591 | -18.2258 | C.3   | 59 ARG300 | 0.0000 |
| 961 CG   | 14.1064 | 13.0698 | -19.6944 | C.3   | 59 ARG300 | 0.0000 |
| 962 CD   | 15.4539 | 12.5776 | -20.2915 | C.3   | 59 ARG300 | 0.0000 |
| 963 NE   | 15.9763 | 11.4296 | -19.5458 | N.pl3 | 59 ARG300 | 0.0000 |
| 964 CZ   | 15.6399 | 10.1759 | -19.7765 | C.cat | 59 ARG300 | 1.0000 |
| 965 NH1  | 14.7517 | 9.8141  | -20.6747 | N.pl3 | 59 ARG300 | 0.0000 |
| 966 NH2  | 16.2223 | 9.2299  | -19.0741 | N.pl3 | 59 ARG300 | 0.0000 |
| 967 H    | 11.3181 | 13.6591 | -18.3663 | H     | 59 ARG300 | 0.0000 |
| 968 HA   | 13.4539 | 14.9984 | -16.8083 | H     | 59 ARG300 | 0.0000 |
| 969 HB3  | 14.3286 | 12.6895 | -17.5536 | H     | 59 ARG300 | 0.0000 |
| 970 HB2  | 15.2426 | 14.0846 | -18.1238 | H     | 59 ARG300 | 0.0000 |
| 971 HG3  | 13.7478 | 13.8859 | -20.3375 | H     | 59 ARG300 | 0.0000 |
| 972 HG2  | 13.3523 | 12.2702 | -19.7314 | H     | 59 ARG300 | 0.0000 |
| 973 HD3  | 16.1792 | 13.4057 | -20.2114 | H     | 59 ARG300 | 0.0000 |
| 974 HD2  | 15.3837 | 12.3822 | -21.3718 | H     | 59 ARG300 | 0.0000 |
| 975 HE   | 16.6866 | 11.6329 | -18.8241 | H     | 59 ARG300 | 0.0000 |
| 976 HH11 | 14.2402 | 10.4992 | -21.2409 | H     | 59 ARG300 | 0.0000 |
| 977 HH12 | 14.5362 | 8.8183  | -20.8330 | H     | 59 ARG300 | 0.0000 |
| 978 HH21 | 16.9256 | 9.4543  | -18.3563 | H     | 59 ARG300 | 0.0000 |
| 979 HH22 | 15.9927 | 8.2355  | -19.2219 | H     | 59 ARG300 | 0.0000 |
| 980 N    | 13.9538 | 16.4195 | -19.1394 | N.am  | 60 CYS301 | 0.0000 |
| BACKBONE |         |         |          |       |           |        |
| 981 CA   | 13.7410 | 17.5200 | -20.0792 | C.3   | 60 CYS301 | 0.0000 |
| BACKBONE |         |         |          |       |           |        |
| 982 C    | 12.6808 | 18.4366 | -19.5201 | C.2   | 60 CYS301 | 0.0000 |
| BACKBONE |         |         |          |       |           |        |
| 983 O    | 11.7438 | 18.7983 | -20.2145 | O.2   | 60 CYS301 | 0.0000 |
| BACKBONE |         |         |          |       |           |        |
| 984 CB   | 13.4194 | 17.0067 | -21.5058 | C.3   | 60 CYS301 | 0.0000 |
| 985 SG   | 14.7816 | 15.9208 | -22.0453 | S.o   | 60 CYS301 | 0.0000 |
| 986 H    | 14.8830 | 16.2690 | -18.8005 | H     | 60 CYS301 | 0.0000 |
| 987 HA   | 14.6592 | 18.1288 | -20.1528 | H     | 60 CYS301 | 0.0000 |
| 988 HB3  | 13.3326 | 17.8528 | -22.2065 | H     | 60 CYS301 | 0.0000 |
| 989 HB2  | 12.4741 | 16.4464 | -21.5145 | H     | 60 CYS301 | 0.0000 |
| 990 LPG2 | 14.8473 | 15.3752 | -21.6464 | LP    | 60 CYS301 | 0.0000 |
| 991 LPG1 | 15.3743 | 16.2504 | -22.0772 | LP    | 60 CYS301 | 0.0000 |
| 992 HG   | 14.4293 | 15.6831 | -22.9592 | H     | 60 CYS301 | 0.0000 |
| 993 N    | 12.8433 | 18.8173 | -18.2338 | N.am  | 61 TRP302 | 0.0000 |
| BACKBONE |         |         |          |       |           |        |
| 994 CA   | 11.9135 | 19.7606 | -17.6255 | C.3   | 61 TRP302 | 0.0000 |
| BACKBONE |         |         |          |       |           |        |
| 995 C    | 12.1489 | 21.1024 | -18.2733 | C.2   | 61 TRP302 | 0.0000 |
| BACKBONE |         |         |          |       |           |        |
| 996 O    | 13.3052 | 21.4406 | -18.4707 | O.2   | 61 TRP302 | 0.0000 |
| BACKBONE |         |         |          |       |           |        |
| 997 CB   | 12.1526 | 19.8840 | -16.0997 | C.3   | 61 TRP302 | 0.0000 |
| 998 CG   | 11.6437 | 18.6534 | -15.4057 | C.2   | 61 TRP302 | 0.0000 |
| 999 CD1  | 12.2867 | 17.4992 | -15.1622 | C.2   | 61 TRP302 | 0.0000 |
| 1000 CD2 | 10.2545 | 18.5058 | -14.8479 | C.ar  | 61 TRP302 | 0.0000 |
| 1001 NE1 | 11.4836 | 16.6805 | -14.5321 | N.pl3 | 61 TRP302 | 0.0000 |

|          |     |         |         |          |       |    |        |         |
|----------|-----|---------|---------|----------|-------|----|--------|---------|
| 1002     | CE2 | 10.2750 | 17.2363 | -14.3078 | C.ar  | 61 | TRP302 | 0.0000  |
| 1003     | CE3 | 9.1317  | 19.3256 | -14.7998 | C.ar  | 61 | TRP302 | 0.0000  |
| 1004     | CZ2 | 9.1603  | 16.7179 | -13.6482 | C.ar  | 61 | TRP302 | 0.0000  |
| 1005     | CZ3 | 8.0029  | 18.8109 | -14.1516 | C.ar  | 61 | TRP302 | 0.0000  |
| 1006     | CH2 | 8.0182  | 17.5267 | -13.5832 | C.ar  | 61 | TRP302 | 0.0000  |
| 1007     | H   | 13.6343 | 18.5058 | -17.7057 | H     | 61 | TRP302 | 0.0000  |
| 1008     | HA  | 10.8792 | 19.4157 | -17.7939 | H     | 61 | TRP302 | 0.0000  |
| 1009     | HB3 | 11.6336 | 20.7655 | -15.6944 | H     | 61 | TRP302 | 0.0000  |
| 1010     | HB2 | 13.2252 | 20.0000 | -15.8999 | H     | 61 | TRP302 | 0.0000  |
| 1011     | HD1 | 13.3140 | 17.2878 | -15.4521 | H     | 61 | TRP302 | 0.0000  |
| 1012     | HE1 | 11.7445 | 15.7269 | -14.2461 | H     | 61 | TRP302 | 0.0000  |
| 1013     | HE3 | 9.1407  | 20.3101 | -15.2451 | H     | 61 | TRP302 | 0.0000  |
| 1014     | HZ2 | 9.1774  | 15.7345 | -13.1990 | H     | 61 | TRP302 | 0.0000  |
| 1015     | HZ3 | 7.1125  | 19.4250 | -14.0965 | H     | 61 | TRP302 | 0.0000  |
| 1016     | HH2 | 7.1321  | 17.1509 | -13.0816 | H     | 61 | TRP302 | 0.0000  |
| 1017     | N   | 11.0791 | 21.8631 | -18.6059 | N.am  | 62 | GLU303 | 0.0000  |
| BACKBONE |     |         |         |          |       |    |        |         |
| 1018     | CA  | 11.2498 | 23.1733 | -19.2277 | C.3   | 62 | GLU303 | 0.0000  |
| BACKBONE |     |         |         |          |       |    |        |         |
| 1019     | C   | 10.9194 | 24.2305 | -18.2052 | C.2   | 62 | GLU303 | 0.0000  |
| BACKBONE |     |         |         |          |       |    |        |         |
| 1020     | O   | 10.2402 | 23.9230 | -17.2381 | O.2   | 62 | GLU303 | 0.0000  |
| BACKBONE |     |         |         |          |       |    |        |         |
| 1021     | CB  | 10.3125 | 23.3387 | -20.4536 | C.3   | 62 | GLU303 | 0.0000  |
| 1022     | CG  | 10.5383 | 22.2092 | -21.4915 | C.3   | 62 | GLU303 | 0.0000  |
| 1023     | CD  | 9.7190  | 22.4808 | -22.7278 | C.2   | 62 | GLU303 | 0.0000  |
| 1024     | OE1 | 8.4770  | 22.2688 | -22.6772 | O.co2 | 62 | GLU303 | -0.5000 |
| 1025     | OE2 | 10.3072 | 22.9115 | -23.7573 | O.co2 | 62 | GLU303 | -0.5000 |
| 1026     | H   | 10.1448 | 21.5662 | -18.4064 | H     | 62 | GLU303 | 0.0000  |
| 1027     | HA  | 12.2849 | 23.3231 | -19.5766 | H     | 62 | GLU303 | 0.0000  |
| 1028     | HB3 | 10.5029 | 24.3153 | -20.9295 | H     | 62 | GLU303 | 0.0000  |
| 1029     | HB2 | 9.2620  | 23.3212 | -20.1219 | H     | 62 | GLU303 | 0.0000  |
| 1030     | HG3 | 10.2412 | 21.2365 | -21.0673 | H     | 62 | GLU303 | 0.0000  |
| 1031     | HG2 | 11.6061 | 22.1541 | -21.7577 | H     | 62 | GLU303 | 0.0000  |
| 1032     | N   | 11.3838 | 25.4836 | -18.4094 | N.am  | 63 | SER304 | 0.0000  |
| BACKBONE |     |         |         |          |       |    |        |         |
| 1033     | CA  | 11.0454 | 26.5389 | -17.4620 | C.3   | 63 | SER304 | 0.0000  |
| BACKBONE |     |         |         |          |       |    |        |         |
| 1034     | C   | 9.5517  | 26.7539 | -17.5214 | C.2   | 63 | SER304 | 0.0000  |
| BACKBONE |     |         |         |          |       |    |        |         |
| 1035     | O   | 9.0000  | 26.6159 | -18.6018 | O.2   | 63 | SER304 | 0.0000  |
| BACKBONE |     |         |         |          |       |    |        |         |
| 1036     | CB  | 11.7751 | 27.8542 | -17.8307 | C.3   | 63 | SER304 | 0.0000  |
| 1037     | OG  | 13.1620 | 27.5425 | -18.0434 | O.3   | 63 | SER304 | 0.0000  |
| 1038     | H   | 11.9384 | 25.7139 | -19.2120 | H     | 63 | SER304 | 0.0000  |
| 1039     | HA  | 11.3724 | 26.2240 | -16.4564 | H     | 63 | SER304 | 0.0000  |
| 1040     | HB3 | 11.6515 | 28.6007 | -17.0278 | H     | 63 | SER304 | 0.0000  |
| 1041     | HB2 | 11.3448 | 28.2578 | -18.7631 | H     | 63 | SER304 | 0.0000  |
| 1042     | HG  | 13.6657 | 28.2952 | -18.3340 | H     | 63 | SER304 | 0.0000  |
| 1043     | N   | 8.8755  | 27.0784 | -16.3951 | N.am  | 64 | GLY305 | 0.0000  |
| BACKBONE |     |         |         |          |       |    |        |         |

|          |        |         |          |       |    |        |         |
|----------|--------|---------|----------|-------|----|--------|---------|
| 1044 CA  | 7.4305 | 27.2952 | -16.4458 | C.3   | 64 | GLY305 | 0.0000  |
| BACKBONE |        |         |          |       |    |        |         |
| 1045 C   | 6.6288 | 26.0250 | -16.2795 | C.2   | 64 | GLY305 | 0.0000  |
| BACKBONE |        |         |          |       |    |        |         |
| 1046 O   | 5.4584 | 26.1462 | -15.9516 | O.2   | 64 | GLY305 | 0.0000  |
| BACKBONE |        |         |          |       |    |        |         |
| 1047 H   | 9.3394 | 27.1545 | -15.5092 | H     | 64 | GLY305 | 0.0000  |
| 1048 HA2 | 7.1339 | 27.7709 | -17.3939 | H     | 64 | GLY305 | 0.0000  |
| 1049 HA3 | 7.1454 | 27.9878 | -15.6365 | H     | 64 | GLY305 | 0.0000  |
| 1050 N   | 7.1841 | 24.8062 | -16.4903 | N.am  | 65 | ASP306 | 0.0000  |
| BACKBONE |        |         |          |       |    |        |         |
| 1051 CA  | 6.3779 | 23.6093 | -16.2543 | C.3   | 65 | ASP306 | 0.0000  |
| BACKBONE |        |         |          |       |    |        |         |
| 1052 C   | 5.9250 | 23.6217 | -14.8116 | C.2   | 65 | ASP306 | 0.0000  |
| BACKBONE |        |         |          |       |    |        |         |
| 1053 O   | 6.6881 | 24.0840 | -13.9783 | O.2   | 65 | ASP306 | 0.0000  |
| BACKBONE |        |         |          |       |    |        |         |
| 1054 CB  | 7.1514 | 22.2862 | -16.4981 | C.3   | 65 | ASP306 | 0.0000  |
| 1055 CG  | 7.4844 | 22.0185 | -17.9433 | C.2   | 65 | ASP306 | 0.0000  |
| 1056 OD1 | 6.9787 | 22.7497 | -18.8365 | O.co2 | 65 | ASP306 | -0.5000 |
| 1057 OD2 | 8.2626 | 21.0582 | -18.1967 | O.co2 | 65 | ASP306 | -0.5000 |
| 1058 H   | 8.1344 | 24.6908 | -16.7798 | H     | 65 | ASP306 | 0.0000  |
| 1059 HA  | 5.5033 | 23.6364 | -16.9253 | H     | 65 | ASP306 | 0.0000  |
| 1060 HB3 | 6.5578 | 21.4345 | -16.1323 | H     | 65 | ASP306 | 0.0000  |
| 1061 HB2 | 8.0840 | 22.3326 | -15.9197 | H     | 65 | ASP306 | 0.0000  |
| 1062 N   | 4.7013 | 23.1237 | -14.5124 | N.am  | 66 | ASP307 | 0.0000  |
| BACKBONE |        |         |          |       |    |        |         |
| 1063 CA  | 4.2150 | 23.0789 | -13.1341 | C.3   | 66 | ASP307 | 0.0000  |
| BACKBONE |        |         |          |       |    |        |         |
| 1064 C   | 4.2869 | 21.6255 | -12.7191 | C.2   | 66 | ASP307 | 0.0000  |
| BACKBONE |        |         |          |       |    |        |         |
| 1065 O   | 3.5165 | 20.8656 | -13.2848 | O.2   | 66 | ASP307 | 0.0000  |
| BACKBONE |        |         |          |       |    |        |         |
| 1066 CB  | 2.7585 | 23.6149 | -13.0664 | C.3   | 66 | ASP307 | 0.0000  |
| 1067 CG  | 2.1331 | 23.4861 | -11.6985 | C.2   | 66 | ASP307 | 0.0000  |
| 1068 OD1 | 2.7354 | 22.8401 | -10.7980 | O.co2 | 66 | ASP307 | -0.5000 |
| 1069 OD2 | 1.0148 | 24.0383 | -11.5131 | O.co2 | 66 | ASP307 | -0.5000 |
| 1070 H   | 4.1150 | 22.7288 | -15.2236 | H     | 66 | ASP307 | 0.0000  |
| 1071 HA  | 4.7860 | 23.7482 | -12.4742 | H     | 66 | ASP307 | 0.0000  |
| 1072 HB3 | 2.1235 | 23.0745 | -13.7793 | H     | 66 | ASP307 | 0.0000  |
| 1073 HB2 | 2.7569 | 24.6768 | -13.3617 | H     | 66 | ASP307 | 0.0000  |
| 1074 N   | 5.1580 | 21.1735 | -11.7800 | N.am  | 67 | PRO308 | 0.0000  |
| BACKBONE |        |         |          |       |    |        |         |
| 1075 CA  | 5.1857 | 19.7623 | -11.4258 | C.3   | 67 | PRO308 | 0.0000  |
| BACKBONE |        |         |          |       |    |        |         |
| 1076 C   | 3.8499 | 19.0817 | -11.2598 | C.2   | 67 | PRO308 | 0.0000  |
| BACKBONE |        |         |          |       |    |        |         |
| 1077 O   | 3.6911 | 17.9954 | -11.7936 | O.2   | 67 | PRO308 | 0.0000  |
| BACKBONE |        |         |          |       |    |        |         |
| 1078 CB  | 5.9909 | 19.8470 | -10.1115 | C.3   | 67 | PRO308 | 0.0000  |
| 1079 CG  | 6.9970 | 20.9831 | -10.3971 | C.3   | 67 | PRO308 | 0.0000  |
| 1080 CD  | 6.1206 | 22.0413 | -11.1086 | C.3   | 67 | PRO308 | 0.0000  |

|          |      |         |         |          |       |    |        |        |
|----------|------|---------|---------|----------|-------|----|--------|--------|
| 1081     | HA   | 5.7784  | 19.2267 | -12.1802 | H     | 67 | PRO308 | 0.0000 |
| 1082     | HB3  | 6.4695  | 18.8895 | -9.8722  | H     | 67 | PRO308 | 0.0000 |
| 1083     | HB2  | 5.3431  | 20.1502 | -9.2735  | H     | 67 | PRO308 | 0.0000 |
| 1084     | HG2  | 7.4971  | 21.3598 | -9.4913  | H     | 67 | PRO308 | 0.0000 |
| 1085     | HG3  | 7.7660  | 20.6173 | -11.0981 | H     | 67 | PRO308 | 0.0000 |
| 1086     | HD2  | 5.6083  | 22.6832 | -10.3736 | H     | 67 | PRO308 | 0.0000 |
| 1087     | HD3  | 6.7396  | 22.6459 | -11.7896 | H     | 67 | PRO308 | 0.0000 |
| 1088     | N    | 2.8755  | 19.6784 | -10.5381 | N.am  | 68 | TRP309 | 0.0000 |
| BACKBONE |      |         |         |          |       |    |        |        |
| 1089     | CA   | 1.6019  | 18.9847 | -10.3633 | C.3   | 68 | TRP309 | 0.0000 |
| BACKBONE |      |         |         |          |       |    |        |        |
| 1090     | C    | 0.9300  | 18.7470 | -11.6959 | C.2   | 68 | TRP309 | 0.0000 |
| BACKBONE |      |         |         |          |       |    |        |        |
| 1091     | O    | 0.4176  | 17.6594 | -11.9114 | O.2   | 68 | TRP309 | 0.0000 |
| BACKBONE |      |         |         |          |       |    |        |        |
| 1092     | CB   | 0.6070  | 19.7498 | -9.4516  | C.3   | 68 | TRP309 | 0.0000 |
| 1093     | CG   | 1.0008  | 19.6908 | -7.9992  | C.2   | 68 | TRP309 | 0.0000 |
| 1094     | CD1  | 1.3366  | 20.7086 | -7.1894  | C.2   | 68 | TRP309 | 0.0000 |
| 1095     | CD2  | 1.0618  | 18.4353 | -7.1668  | C.ar  | 68 | TRP309 | 0.0000 |
| 1096     | NE1  | 1.5662  | 20.2507 | -5.9841  | N.pl3 | 68 | TRP309 | 0.0000 |
| 1097     | CE2  | 1.3866  | 18.9175 | -5.9145  | C.ar  | 68 | TRP309 | 0.0000 |
| 1098     | CE3  | 0.8682  | 17.0778 | -7.4084  | C.ar  | 68 | TRP309 | 0.0000 |
| 1099     | CZ2  | 1.4737  | 18.0744 | -4.8075  | C.ar  | 68 | TRP309 | 0.0000 |
| 1100     | CZ3  | 0.9857  | 16.2121 | -6.3152  | C.ar  | 68 | TRP309 | 0.0000 |
| 1101     | CH2  | 1.2330  | 16.7115 | -5.0273  | C.ar  | 68 | TRP309 | 0.0000 |
| 1102     | H    | 3.0083  | 20.5792 | -10.1199 | H     | 68 | TRP309 | 0.0000 |
| 1103     | HA   | 1.8273  | 18.0053 | -9.9169  | H     | 68 | TRP309 | 0.0000 |
| 1104     | HB3  | -0.3871 | 19.2794 | -9.5161  | H     | 68 | TRP309 | 0.0000 |
| 1105     | HB2  | 0.5116  | 20.7926 | -9.7930  | H     | 68 | TRP309 | 0.0000 |
| 1106     | HD1  | 1.3987  | 21.7544 | -7.4897  | H     | 68 | TRP309 | 0.0000 |
| 1107     | HE1  | 1.8355  | 20.8394 | -5.1818  | H     | 68 | TRP309 | 0.0000 |
| 1108     | HE3  | 0.6381  | 16.7163 | -8.3986  | H     | 68 | TRP309 | 0.0000 |
| 1109     | HZ2  | 1.7164  | 18.4601 | -3.8237  | H     | 68 | TRP309 | 0.0000 |
| 1110     | HZ3  | 0.8909  | 15.1432 | -6.4687  | H     | 68 | TRP309 | 0.0000 |
| 1111     | HH2  | 1.2467  | 16.0298 | -4.1884  | H     | 68 | TRP309 | 0.0000 |
| 1112     | N    | 0.9134  | 19.7499 | -12.6017 | N.am  | 69 | VAL310 | 0.0000 |
| BACKBONE |      |         |         |          |       |    |        |        |
| 1113     | CA   | 0.2434  | 19.5475 | -13.8847 | C.3   | 69 | VAL310 | 0.0000 |
| BACKBONE |      |         |         |          |       |    |        |        |
| 1114     | C    | 0.9448  | 18.4293 | -14.6164 | C.2   | 69 | VAL310 | 0.0000 |
| BACKBONE |      |         |         |          |       |    |        |        |
| 1115     | O    | 0.2627  | 17.5569 | -15.1275 | O.2   | 69 | VAL310 | 0.0000 |
| BACKBONE |      |         |         |          |       |    |        |        |
| 1116     | CB   | 0.2005  | 20.8289 | -14.7678 | C.3   | 69 | VAL310 | 0.0000 |
| 1117     | CG1  | -0.3531 | 20.5324 | -16.1898 | C.3   | 69 | VAL310 | 0.0000 |
| 1118     | CG2  | -0.6695 | 21.9286 | -14.0927 | C.3   | 69 | VAL310 | 0.0000 |
| 1119     | H    | 1.3721  | 20.6196 | -12.4139 | H     | 69 | VAL310 | 0.0000 |
| 1120     | HA   | -0.7956 | 19.2404 | -13.6837 | H     | 69 | VAL310 | 0.0000 |
| 1121     | HB   | 1.2332  | 21.1911 | -14.8934 | H     | 69 | VAL310 | 0.0000 |
| 1122     | HG13 | 0.2807  | 19.8140 | -16.7322 | H     | 69 | VAL310 | 0.0000 |
| 1123     | HG12 | -0.3961 | 21.4580 | -16.7845 | H     | 69 | VAL310 | 0.0000 |
| 1124     | HG11 | -1.3684 | 20.1208 | -16.1156 | H     | 69 | VAL310 | 0.0000 |



|          |      |         |         |          |       |    |        |        |
|----------|------|---------|---------|----------|-------|----|--------|--------|
| 1125     | HG23 | -1.7163 | 21.5955 | -14.0191 | H     | 69 | VAL310 | 0.0000 |
| 1126     | HG22 | -0.6414 | 22.8555 | -14.6859 | H     | 69 | VAL310 | 0.0000 |
| 1127     | HG21 | -0.3143 | 22.1639 | -13.0794 | H     | 69 | VAL310 | 0.0000 |
| 1128     | N    | 2.2955  | 18.4291 | -14.6823 | N.am  | 70 | GLN311 | 0.0000 |
| BACKBONE |      |         |         |          |       |    |        |        |
| 1129     | CA   | 2.9820  | 17.3588 | -15.4051 | C.3   | 70 | GLN311 | 0.0000 |
| BACKBONE |      |         |         |          |       |    |        |        |
| 1130     | C    | 2.6469  | 16.0153 | -14.7887 | C.2   | 70 | GLN311 | 0.0000 |
| BACKBONE |      |         |         |          |       |    |        |        |
| 1131     | O    | 2.4317  | 15.0610 | -15.5191 | O.2   | 70 | GLN311 | 0.0000 |
| BACKBONE |      |         |         |          |       |    |        |        |
| 1132     | CB   | 4.5267  | 17.5334 | -15.4367 | C.3   | 70 | GLN311 | 0.0000 |
| 1133     | CG   | 4.9767  | 18.7983 | -16.2201 | C.3   | 70 | GLN311 | 0.0000 |
| 1134     | CD   | 4.4410  | 18.8052 | -17.6332 | C.2   | 70 | GLN311 | 0.0000 |
| 1135     | OE1  | 4.6335  | 17.8187 | -18.3300 | O.2   | 70 | GLN311 | 0.0000 |
| 1136     | NE2  | 3.7691  | 19.8835 | -18.0942 | N.am  | 70 | GLN311 | 0.0000 |
| 1137     | H    | 2.8322  | 19.1449 | -14.2332 | H     | 70 | GLN311 | 0.0000 |
| 1138     | HA   | 2.6149  | 17.3703 | -16.4420 | H     | 70 | GLN311 | 0.0000 |
| 1139     | HB3  | 4.9701  | 16.6505 | -15.9245 | H     | 70 | GLN311 | 0.0000 |
| 1140     | HB2  | 4.9086  | 17.5786 | -14.4041 | H     | 70 | GLN311 | 0.0000 |
| 1141     | HG3  | 6.0756  | 18.8056 | -16.2949 | H     | 70 | GLN311 | 0.0000 |
| 1142     | HG2  | 4.6742  | 19.7015 | -15.6688 | H     | 70 | GLN311 | 0.0000 |
| 1143     | HE21 | 3.6098  | 20.6910 | -17.5243 | H     | 70 | GLN311 | 0.0000 |
| 1144     | HE22 | 3.4166  | 19.8811 | -19.0313 | H     | 70 | GLN311 | 0.0000 |
| 1145     | N    | 2.5956  | 15.9248 | -13.4407 | N.am  | 71 | HIS312 | 0.0000 |
| BACKBONE |      |         |         |          |       |    |        |        |
| 1146     | CA   | 2.3017  | 14.6455 | -12.7849 | C.3   | 71 | HIS312 | 0.0000 |
| BACKBONE |      |         |         |          |       |    |        |        |
| 1147     | C    | 0.9679  | 14.1287 | -13.2797 | C.2   | 71 | HIS312 | 0.0000 |
| BACKBONE |      |         |         |          |       |    |        |        |
| 1148     | O    | 0.8656  | 12.9587 | -13.6130 | O.2   | 71 | HIS312 | 0.0000 |
| BACKBONE |      |         |         |          |       |    |        |        |
| 1149     | CB   | 2.3247  | 14.8258 | -11.2366 | C.3   | 71 | HIS312 | 0.0000 |
| 1150     | CG   | 2.5476  | 13.6026 | -10.3770 | C.2   | 71 | HIS312 | 0.0000 |
| 1151     | ND1  | 2.8608  | 13.7150 | -9.1037  | N.pl3 | 71 | HIS312 | 0.0000 |
| 1152     | CD2  | 2.4943  | 12.2991 | -10.7250 | C.2   | 71 | HIS312 | 0.0000 |
| 1153     | CE1  | 3.0459  | 12.5423 | -8.5898  | C.cat | 71 | HIS312 | 1.0000 |
| 1154     | NE2  | 2.8545  | 11.6781 | -9.4777  | N.2   | 71 | HIS312 | 0.0000 |
| 1155     | H    | 2.7630  | 16.7384 | -12.8824 | H     | 71 | HIS312 | 0.0000 |
| 1156     | HA   | 3.0844  | 13.9303 | -13.0813 | H     | 71 | HIS312 | 0.0000 |
| 1157     | HB3  | 1.4216  | 15.3598 | -10.9141 | H     | 71 | HIS312 | 0.0000 |
| 1158     | HB2  | 3.1859  | 15.4630 | -10.9879 | H     | 71 | HIS312 | 0.0000 |
| 1159     | HD1  | 2.9628  | 14.6046 | -8.5918  | H     | 71 | HIS312 | 0.0000 |
| 1160     | HD2  | 2.2580  | 11.8501 | -11.6796 | H     | 71 | HIS312 | 0.0000 |
| 1161     | HE1  | 3.3295  | 12.3507 | -7.5582  | H     | 71 | HIS312 | 0.0000 |
| 1162     | N    | -0.0651 | 14.9983 | -13.3524 | N.am  | 72 | ALA313 | 0.0000 |
| BACKBONE |      |         |         |          |       |    |        |        |
| 1163     | CA   | -1.3570 | 14.5704 | -13.8922 | C.3   | 72 | ALA313 | 0.0000 |
| BACKBONE |      |         |         |          |       |    |        |        |
| 1164     | C    | -1.3120 | 14.3398 | -15.3821 | C.2   | 72 | ALA313 | 0.0000 |
| BACKBONE |      |         |         |          |       |    |        |        |

|          |         |         |          |       |           |        |
|----------|---------|---------|----------|-------|-----------|--------|
| 1165 O   | -1.9685 | 13.4257 | -15.8547 | O.2   | 72 ALA313 | 0.0000 |
| BACKBONE |         |         |          |       |           |        |
| 1166 CB  | -2.4454 | 15.6334 | -13.5898 | C.3   | 72 ALA313 | 0.0000 |
| 1167 H   | 0.0499  | 15.9535 | -13.0704 | H     | 72 ALA313 | 0.0000 |
| 1168 HA  | -1.6385 | 13.6043 | -13.4530 | H     | 72 ALA313 | 0.0000 |
| 1169 HB3 | -2.1606 | 16.5953 | -14.0362 | H     | 72 ALA313 | 0.0000 |
| 1170 HB2 | -2.5588 | 15.7809 | -12.5062 | H     | 72 ALA313 | 0.0000 |
| 1171 HB1 | -3.4134 | 15.3236 | -14.0091 | H     | 72 ALA313 | 0.0000 |
| 1172 N   | -0.5586 | 15.1591 | -16.1417 | N.am  | 73 LYS314 | 0.0000 |
| BACKBONE |         |         |          |       |           |        |
| 1173 CA  | -0.5434 | 15.0039 | -17.5938 | C.3   | 73 LYS314 | 0.0000 |
| BACKBONE |         |         |          |       |           |        |
| 1174 C   | -0.0578 | 13.6204 | -17.9610 | C.2   | 73 LYS314 | 0.0000 |
| BACKBONE |         |         |          |       |           |        |
| 1175 O   | -0.6339 | 13.0174 | -18.8528 | O.2   | 73 LYS314 | 0.0000 |
| BACKBONE |         |         |          |       |           |        |
| 1176 CB  | 0.3580  | 16.0968 | -18.2298 | C.3   | 73 LYS314 | 0.0000 |
| 1177 CG  | 0.3192  | 16.1161 | -19.7840 | C.3   | 73 LYS314 | 0.0000 |
| 1178 CD  | 0.8791  | 17.4590 | -20.3425 | C.3   | 73 LYS314 | 0.0000 |
| 1179 CE  | -0.1634 | 18.6201 | -20.3147 | C.3   | 73 LYS314 | 0.0000 |
| 1180 NZ  | -1.0516 | 18.6138 | -21.5026 | N.4   | 73 LYS314 | 1.0000 |
| 1181 H   | -0.0160 | 15.8839 | -15.7202 | H     | 73 LYS314 | 0.0000 |
| 1182 HA  | -1.5728 | 15.1513 | -17.9607 | H     | 73 LYS314 | 0.0000 |
| 1183 HB3 | 1.3984  | 15.9392 | -17.9065 | H     | 73 LYS314 | 0.0000 |
| 1184 HB2 | 0.0229  | 17.0675 | -17.8347 | H     | 73 LYS314 | 0.0000 |
| 1185 HG3 | -0.7085 | 15.9654 | -20.1473 | H     | 73 LYS314 | 0.0000 |
| 1186 HG2 | 0.9315  | 15.2745 | -20.1516 | H     | 73 LYS314 | 0.0000 |
| 1187 HD3 | 1.2132  | 17.3225 | -21.3839 | H     | 73 LYS314 | 0.0000 |
| 1188 HD2 | 1.7663  | 17.7358 | -19.7477 | H     | 73 LYS314 | 0.0000 |
| 1189 HE3 | 0.3738  | 19.5845 | -20.2969 | H     | 73 LYS314 | 0.0000 |
| 1190 HE2 | -0.7818 | 18.5758 | -19.4039 | H     | 73 LYS314 | 0.0000 |
| 1191 HZ3 | -0.5027 | 18.8167 | -22.4128 | H     | 73 LYS314 | 0.0000 |
| 1192 HZ2 | -1.8161 | 19.3768 | -21.4307 | H     | 73 LYS314 | 0.0000 |
| 1193 HZ1 | -1.5653 | 17.6737 | -21.6416 | H     | 73 LYS314 | 0.0000 |
| 1194 N   | 0.9999  | 13.1145 | -17.2822 | N.am  | 74 TRP315 | 0.0000 |
| BACKBONE |         |         |          |       |           |        |
| 1195 CA  | 1.5815  | 11.8196 | -17.6445 | C.3   | 74 TRP315 | 0.0000 |
| BACKBONE |         |         |          |       |           |        |
| 1196 C   | 1.0750  | 10.6587 | -16.8165 | C.2   | 74 TRP315 | 0.0000 |
| BACKBONE |         |         |          |       |           |        |
| 1197 O   | 0.9565  | 9.5841  | -17.3848 | O.2   | 74 TRP315 | 0.0000 |
| BACKBONE |         |         |          |       |           |        |
| 1198 CB  | 3.1256  | 11.9213 | -17.5418 | C.3   | 74 TRP315 | 0.0000 |
| 1199 CG  | 3.5803  | 12.9069 | -18.5846 | C.2   | 74 TRP315 | 0.0000 |
| 1200 CD1 | 4.0381  | 14.1587 | -18.4110 | C.2   | 74 TRP315 | 0.0000 |
| 1201 CD2 | 3.5812  | 12.6387 | -20.0667 | C.ar  | 74 TRP315 | 0.0000 |
| 1202 NE1 | 4.3041  | 14.6874 | -19.5774 | N.pl3 | 74 TRP315 | 0.0000 |
| 1203 CE2 | 4.0549  | 13.8267 | -20.5864 | C.ar  | 74 TRP315 | 0.0000 |
| 1204 CE3 | 3.2391  | 11.5544 | -20.8756 | C.ar  | 74 TRP315 | 0.0000 |
| 1205 CZ2 | 4.2224  | 14.0048 | -21.9594 | C.ar  | 74 TRP315 | 0.0000 |
| 1206 CZ3 | 3.4259  | 11.7119 | -22.2547 | C.ar  | 74 TRP315 | 0.0000 |
| 1207 CH2 | 3.9122  | 12.9170 | -22.7867 | C.ar  | 74 TRP315 | 0.0000 |

|          |     |         |         |          |      |    |        |        |
|----------|-----|---------|---------|----------|------|----|--------|--------|
| 1208     | H   | 1.4188  | 13.6311 | -16.5325 | H    | 74 | TRP315 | 0.0000 |
| 1209     | HA  | 1.3412  | 11.5865 | -18.6951 | H    | 74 | TRP315 | 0.0000 |
| 1210     | HB3 | 3.5967  | 10.9482 | -17.7507 | H    | 74 | TRP315 | 0.0000 |
| 1211     | HB2 | 3.4236  | 12.2438 | -16.5320 | H    | 74 | TRP315 | 0.0000 |
| 1212     | HD1 | 4.1646  | 14.6572 | -17.4511 | H    | 74 | TRP315 | 0.0000 |
| 1213     | HE1 | 4.6680  | 15.6433 | -19.7102 | H    | 74 | TRP315 | 0.0000 |
| 1214     | HE3 | 2.8527  | 10.6329 | -20.4549 | H    | 74 | TRP315 | 0.0000 |
| 1215     | HZ2 | 4.5801  | 14.9441 | -22.3672 | H    | 74 | TRP315 | 0.0000 |
| 1216     | HZ3 | 3.1928  | 10.8866 | -22.9203 | H    | 74 | TRP315 | 0.0000 |
| 1217     | HH2 | 4.0518  | 13.0071 | -23.8595 | H    | 74 | TRP315 | 0.0000 |
| 1218     | N   | 0.7819  | 10.8201 | -15.5037 | N.am | 75 | PHE316 | 0.0000 |
| BACKBONE |     |         |         |          |      |    |        |        |
| 1219     | CA  | 0.3552  | 9.6824  | -14.6837 | C.3  | 75 | PHE316 | 0.0000 |
| BACKBONE |     |         |         |          |      |    |        |        |
| 1220     | C   | -0.9283 | 10.0456 | -13.9655 | C.2  | 75 | PHE316 | 0.0000 |
| BACKBONE |     |         |         |          |      |    |        |        |
| 1221     | O   | -0.8957 | 10.1933 | -12.7535 | O.2  | 75 | PHE316 | 0.0000 |
| BACKBONE |     |         |         |          |      |    |        |        |
| 1222     | CB  | 1.5134  | 9.2895  | -13.7274 | C.3  | 75 | PHE316 | 0.0000 |
| 1223     | CG  | 2.8435  | 9.3340  | -14.4935 | C.ar | 75 | PHE316 | 0.0000 |
| 1224     | CD1 | 3.1507  | 8.3584  | -15.4490 | C.ar | 75 | PHE316 | 0.0000 |
| 1225     | CD2 | 3.7618  | 10.3606 | -14.2516 | C.ar | 75 | PHE316 | 0.0000 |
| 1226     | CE1 | 4.3446  | 8.4275  | -16.1751 | C.ar | 75 | PHE316 | 0.0000 |
| 1227     | CE2 | 4.9731  | 10.4030 | -14.9422 | C.ar | 75 | PHE316 | 0.0000 |
| 1228     | CZ  | 5.2598  | 9.4530  | -15.9254 | C.ar | 75 | PHE316 | 0.0000 |
| 1229     | H   | 0.8884  | 11.7059 | -15.0511 | H    | 75 | PHE316 | 0.0000 |
| 1230     | HA  | 0.1708  | 8.7737  | -15.2755 | H    | 75 | PHE316 | 0.0000 |
| 1231     | HB3 | 1.3563  | 8.2846  | -13.3014 | H    | 75 | PHE316 | 0.0000 |
| 1232     | HB2 | 1.5547  | 9.9934  | -12.8883 | H    | 75 | PHE316 | 0.0000 |
| 1233     | HD1 | 2.4589  | 7.5432  | -15.6326 | H    | 75 | PHE316 | 0.0000 |
| 1234     | HD2 | 3.5497  | 11.1392 | -13.5299 | H    | 75 | PHE316 | 0.0000 |
| 1235     | HE1 | 4.5638  | 7.6823  | -16.9333 | H    | 75 | PHE316 | 0.0000 |
| 1236     | HE2 | 5.6834  | 11.1794 | -14.7032 | H    | 75 | PHE316 | 0.0000 |
| 1237     | HZ  | 6.1870  | 9.5112  | -16.4855 | H    | 75 | PHE316 | 0.0000 |
| 1238     | N   | -2.0914 | 10.2007 | -14.6503 | N.am | 76 | PRO317 | 0.0000 |
| BACKBONE |     |         |         |          |      |    |        |        |
| 1239     | CA  | -3.3071 | 10.5740 | -13.9373 | C.3  | 76 | PRO317 | 0.0000 |
| BACKBONE |     |         |         |          |      |    |        |        |
| 1240     | C   | -3.8037 | 9.5073  | -12.9865 | C.2  | 76 | PRO317 | 0.0000 |
| BACKBONE |     |         |         |          |      |    |        |        |
| 1241     | O   | -4.6664 | 9.8326  | -12.1872 | O.2  | 76 | PRO317 | 0.0000 |
| BACKBONE |     |         |         |          |      |    |        |        |
| 1242     | CB  | -4.2770 | 10.7893 | -15.1263 | C.3  | 76 | PRO317 | 0.0000 |
| 1243     | CG  | -3.7154 | 9.8822  | -16.2416 | C.3  | 76 | PRO317 | 0.0000 |
| 1244     | CD  | -2.1840 | 10.0316 | -16.0965 | C.3  | 76 | PRO317 | 0.0000 |
| 1245     | HA  | -3.1585 | 11.5119 | -13.3771 | H    | 76 | PRO317 | 0.0000 |
| 1246     | HB3 | -4.2122 | 11.8351 | -15.4640 | H    | 76 | PRO317 | 0.0000 |
| 1247     | HB2 | -5.3279 | 10.5582 | -14.8902 | H    | 76 | PRO317 | 0.0000 |
| 1248     | HG2 | -4.0047 | 8.8401  | -16.0239 | H    | 76 | PRO317 | 0.0000 |
| 1249     | HG3 | -4.0810 | 10.1519 | -17.2460 | H    | 76 | PRO317 | 0.0000 |
| 1250     | HD2 | -1.6921 | 9.1399  | -16.5114 | H    | 76 | PRO317 | 0.0000 |
| 1251     | HD3 | -1.8187 | 10.9358 | -16.6072 | H    | 76 | PRO317 | 0.0000 |

|           |         |         |          |       |    |        |        |
|-----------|---------|---------|----------|-------|----|--------|--------|
| 1252 N    | -3.2964 | 8.2517  | -13.0195 | N.am  | 77 | ARG318 | 0.0000 |
| BACKBONE  |         |         |          |       |    |        |        |
| 1253 CA   | -3.7280 | 7.2528  | -12.0379 | C.3   | 77 | ARG318 | 0.0000 |
| BACKBONE  |         |         |          |       |    |        |        |
| 1254 C    | -2.8170 | 7.2338  | -10.8254 | C.2   | 77 | ARG318 | 0.0000 |
| BACKBONE  |         |         |          |       |    |        |        |
| 1255 O    | -2.9320 | 6.3044  | -10.0414 | O.2   | 77 | ARG318 | 0.0000 |
| BACKBONE  |         |         |          |       |    |        |        |
| 1256 CB   | -3.7757 | 5.8485  | -12.7048 | C.3   | 77 | ARG318 | 0.0000 |
| 1257 CG   | -4.7239 | 5.8345  | -13.9362 | C.3   | 77 | ARG318 | 0.0000 |
| 1258 CD   | -4.7633 | 4.4349  | -14.6096 | C.3   | 77 | ARG318 | 0.0000 |
| 1259 NE   | -3.4224 | 4.0039  | -15.0199 | N.pl3 | 77 | ARG318 | 0.0000 |
| 1260 CZ   | -2.8055 | 4.4162  | -16.1099 | C.cat | 77 | ARG318 | 1.0000 |
| 1261 NH1  | -3.3228 | 5.2752  | -16.9595 | N.pl3 | 77 | ARG318 | 0.0000 |
| 1262 NH2  | -1.6050 | 3.9446  | -16.3660 | N.pl3 | 77 | ARG318 | 0.0000 |
| 1263 H    | -2.5816 | 7.9891  | -13.6690 | H     | 77 | ARG318 | 0.0000 |
| 1264 HA   | -4.7464 | 7.4650  | -11.6726 | H     | 77 | ARG318 | 0.0000 |
| 1265 HB3  | -4.1268 | 5.0987  | -11.9766 | H     | 77 | ARG318 | 0.0000 |
| 1266 HB2  | -2.7551 | 5.5723  | -13.0152 | H     | 77 | ARG318 | 0.0000 |
| 1267 HG3  | -4.3880 | 6.5868  | -14.6635 | H     | 77 | ARG318 | 0.0000 |
| 1268 HG2  | -5.7426 | 6.1089  | -13.6155 | H     | 77 | ARG318 | 0.0000 |
| 1269 HD3  | -5.4829 | 4.4004  | -15.4424 | H     | 77 | ARG318 | 0.0000 |
| 1270 HD2  | -5.1473 | 3.7219  | -13.8598 | H     | 77 | ARG318 | 0.0000 |
| 1271 HE   | -2.9506 | 3.3160  | -14.4090 | H     | 77 | ARG318 | 0.0000 |
| 1272 HH11 | -4.2557 | 5.6794  | -16.8248 | H     | 77 | ARG318 | 0.0000 |
| 1273 HH12 | -2.7995 | 5.5695  | -17.7981 | H     | 77 | ARG318 | 0.0000 |
| 1274 HH21 | -1.1492 | 3.2683  | -15.7347 | H     | 77 | ARG318 | 0.0000 |
| 1275 HH22 | -1.0844 | 4.2375  | -17.2069 | H     | 77 | ARG318 | 0.0000 |
| 1276 N    | -1.9060 | 8.2188  | -10.6280 | N.am  | 78 | CYS319 | 0.0000 |
| BACKBONE  |         |         |          |       |    |        |        |
| 1277 CA   | -0.9935 | 8.1509  | -9.4853  | C.3   | 78 | CYS319 | 0.0000 |
| BACKBONE  |         |         |          |       |    |        |        |
| 1278 C    | -1.7916 | 8.3230  | -8.2099  | C.2   | 78 | CYS319 | 0.0000 |
| BACKBONE  |         |         |          |       |    |        |        |
| 1279 O    | -2.6112 | 9.2252  | -8.1662  | O.2   | 78 | CYS319 | 0.0000 |
| BACKBONE  |         |         |          |       |    |        |        |
| 1280 CB   | 0.1639  | 9.1778  | -9.6489  | C.3   | 78 | CYS319 | 0.0000 |
| 1281 SG   | 1.3040  | 9.1757  | -8.2233  | S.3   | 78 | CYS319 | 0.0000 |
| 1282 H    | -1.8310 | 9.0034  | -11.2436 | H     | 78 | CYS319 | 0.0000 |
| 1283 HA   | -0.5380 | 7.1482  | -9.4913  | H     | 78 | CYS319 | 0.0000 |
| 1284 HB3  | -0.2213 | 10.1956 | -9.7743  | H     | 78 | CYS319 | 0.0000 |
| 1285 HB2  | 0.7175  | 8.9310  | -10.5656 | H     | 78 | CYS319 | 0.0000 |
| 1286 LPG2 | 1.3591  | 8.5595  | -7.9435  | LP    | 78 | CYS319 | 0.0000 |
| 1287 LPG1 | 1.1175  | 9.6240  | -7.7487  | LP    | 78 | CYS319 | 0.0000 |
| 1288 N    | -1.6034 | 7.4684  | -7.1731  | N.am  | 79 | GLU320 | 0.0000 |
| BACKBONE  |         |         |          |       |    |        |        |
| 1289 CA   | -2.4354 | 7.5697  | -5.9710  | C.3   | 79 | GLU320 | 0.0000 |
| BACKBONE  |         |         |          |       |    |        |        |
| 1290 C    | -1.9991 | 8.7130  | -5.0877  | C.2   | 79 | GLU320 | 0.0000 |
| BACKBONE  |         |         |          |       |    |        |        |
| 1291 O    | -2.8570 | 9.3232  | -4.4710  | O.2   | 79 | GLU320 | 0.0000 |
| BACKBONE  |         |         |          |       |    |        |        |

|          |     |         |         |          |       |    |        |         |
|----------|-----|---------|---------|----------|-------|----|--------|---------|
| 1292     | CB  | -2.4691 | 6.2542  | -5.1465  | C.3   | 79 | GLU320 | 0.0000  |
| 1293     | CG  | -3.2597 | 5.1417  | -5.8893  | C.3   | 79 | GLU320 | 0.0000  |
| 1294     | CD  | -4.7256 | 5.4648  | -6.0560  | C.2   | 79 | GLU320 | 0.0000  |
| 1295     | OE1 | -5.3019 | 6.1544  | -5.1708  | O.co2 | 79 | GLU320 | -0.5000 |
| 1296     | OE2 | -5.3202 | 5.0270  | -7.0781  | O.co2 | 79 | GLU320 | -0.5000 |
| 1297     | H   | -0.8999 | 6.7558  | -7.2058  | H     | 79 | GLU320 | 0.0000  |
| 1298     | HA  | -3.4687 | 7.7772  | -6.2773  | H     | 79 | GLU320 | 0.0000  |
| 1299     | HB3 | -2.9482 | 6.4345  | -4.1696  | H     | 79 | GLU320 | 0.0000  |
| 1300     | HB2 | -1.4375 | 5.9233  | -4.9521  | H     | 79 | GLU320 | 0.0000  |
| 1301     | HG3 | -3.2030 | 4.2091  | -5.3117  | H     | 79 | GLU320 | 0.0000  |
| 1302     | HG2 | -2.8019 | 4.9613  | -6.8749  | H     | 79 | GLU320 | 0.0000  |
| 1303     | N   | -0.6907 | 9.0332  | -5.0016  | N.am  | 80 | TYR321 | 0.0000  |
| BACKBONE |     |         |         |          |       |    |        |         |
| 1304     | CA  | -0.2835 | 10.1976 | -4.2149  | C.3   | 80 | TYR321 | 0.0000  |
| BACKBONE |     |         |         |          |       |    |        |         |
| 1305     | C   | -0.9321 | 11.4222 | -4.8147  | C.2   | 80 | TYR321 | 0.0000  |
| BACKBONE |     |         |         |          |       |    |        |         |
| 1306     | O   | -1.5324 | 12.2106 | -4.1030  | O.2   | 80 | TYR321 | 0.0000  |
| BACKBONE |     |         |         |          |       |    |        |         |
| 1307     | CB  | 1.2580  | 10.3617 | -4.2310  | C.3   | 80 | TYR321 | 0.0000  |
| 1308     | CG  | 1.6970  | 11.6894 | -3.6018  | C.ar  | 80 | TYR321 | 0.0000  |
| 1309     | CD1 | 1.5628  | 11.8923 | -2.2265  | C.ar  | 80 | TYR321 | 0.0000  |
| 1310     | CD2 | 2.2504  | 12.7076 | -4.3853  | C.ar  | 80 | TYR321 | 0.0000  |
| 1311     | CE1 | 2.1279  | 13.0162 | -1.6155  | C.ar  | 80 | TYR321 | 0.0000  |
| 1312     | CE2 | 2.8169  | 13.8300 | -3.7796  | C.ar  | 80 | TYR321 | 0.0000  |
| 1313     | CZ  | 2.7814  | 13.9810 | -2.3902  | C.ar  | 80 | TYR321 | 0.0000  |
| 1314     | OH  | 3.3937  | 15.0947 | -1.8076  | O.3   | 80 | TYR321 | 0.0000  |
| 1315     | H   | -0.0008 | 8.5120  | -5.5042  | H     | 80 | TYR321 | 0.0000  |
| 1316     | HA  | -0.6261 | 10.0675 | -3.1749  | H     | 80 | TYR321 | 0.0000  |
| 1317     | HB2 | 1.6423  | 10.2992 | -5.2608  | H     | 80 | TYR321 | 0.0000  |
| 1318     | HB3 | 1.7053  | 9.5356  | -3.6597  | H     | 80 | TYR321 | 0.0000  |
| 1319     | HD1 | 1.0214  | 11.1701 | -1.6304  | H     | 80 | TYR321 | 0.0000  |
| 1320     | HD2 | 2.2445  | 12.6304 | -5.4649  | H     | 80 | TYR321 | 0.0000  |
| 1321     | HE1 | 2.0545  | 13.1288 | -0.5392  | H     | 80 | TYR321 | 0.0000  |
| 1322     | HE2 | 3.2854  | 14.5915 | -4.3898  | H     | 80 | TYR321 | 0.0000  |
| 1323     | HH  | 3.2489  | 15.1729 | -0.8713  | H     | 80 | TYR321 | 0.0000  |
| 1324     | N   | -0.8182 | 11.5724 | -6.1496  | N.am  | 81 | LEU322 | 0.0000  |
| BACKBONE |     |         |         |          |       |    |        |         |
| 1325     | CA  | -1.4569 | 12.6926 | -6.8357  | C.3   | 81 | LEU322 | 0.0000  |
| BACKBONE |     |         |         |          |       |    |        |         |
| 1326     | C   | -2.9282 | 12.7562 | -6.4955  | C.2   | 81 | LEU322 | 0.0000  |
| BACKBONE |     |         |         |          |       |    |        |         |
| 1327     | O   | -3.4191 | 13.8333 | -6.1975  | O.2   | 81 | LEU322 | 0.0000  |
| BACKBONE |     |         |         |          |       |    |        |         |
| 1328     | CB  | -1.2836 | 12.4718 | -8.3604  | C.3   | 81 | LEU322 | 0.0000  |
| 1329     | CG  | -1.9934 | 13.4958 | -9.2797  | C.3   | 81 | LEU322 | 0.0000  |
| 1330     | CD1 | -1.3651 | 14.9035 | -9.1598  | C.3   | 81 | LEU322 | 0.0000  |
| 1331     | CD2 | -1.8893 | 12.9859 | -10.7405 | C.3   | 81 | LEU322 | 0.0000  |
| 1332     | H   | -0.2945 | 10.9087 | -6.6836  | H     | 81 | LEU322 | 0.0000  |
| 1333     | HA  | -0.9579 | 13.6190 | -6.5182  | H     | 81 | LEU322 | 0.0000  |
| 1334     | HB3 | -1.7278 | 11.4931 | -8.5795  | H     | 81 | LEU322 | 0.0000  |
| 1335     | HB2 | -0.2095 | 12.4375 | -8.6089  | H     | 81 | LEU322 | 0.0000  |

|          |      |         |         |          |       |    |        |        |
|----------|------|---------|---------|----------|-------|----|--------|--------|
| 1336     | HG   | -3.0551 | 13.5736 | -9.0029  | H     | 81 | LEU322 | 0.0000 |
| 1337     | HD13 | -1.4932 | 15.2983 | -8.1432  | H     | 81 | LEU322 | 0.0000 |
| 1338     | HD12 | -1.8259 | 15.6088 | -9.8689  | H     | 81 | LEU322 | 0.0000 |
| 1339     | HD11 | -0.2943 | 14.8217 | -9.3818  | H     | 81 | LEU322 | 0.0000 |
| 1340     | HD23 | -0.8441 | 12.9949 | -11.0878 | H     | 81 | LEU322 | 0.0000 |
| 1341     | HD22 | -2.4873 | 13.6479 | -11.3711 | H     | 81 | LEU322 | 0.0000 |
| 1342     | HD21 | -2.2843 | 11.9647 | -10.8514 | H     | 81 | LEU322 | 0.0000 |
| 1343     | N    | -3.6494 | 11.6127 | -6.5349  | N.am  | 82 | ILE323 | 0.0000 |
| BACKBONE |      |         |         |          |       |    |        |        |
| 1344     | CA   | -5.0694 | 11.6336 | -6.1841  | C.3   | 82 | ILE323 | 0.0000 |
| BACKBONE |      |         |         |          |       |    |        |        |
| 1345     | C    | -5.1939 | 12.1018 | -4.7524  | C.2   | 82 | ILE323 | 0.0000 |
| BACKBONE |      |         |         |          |       |    |        |        |
| 1346     | O    | -6.0155 | 12.9616 | -4.4772  | O.2   | 82 | ILE323 | 0.0000 |
| BACKBONE |      |         |         |          |       |    |        |        |
| 1347     | CB   | -5.7477 | 10.2417 | -6.3885  | C.3   | 82 | ILE323 | 0.0000 |
| 1348     | CG1  | -5.8648 | 9.9207  | -7.9117  | C.3   | 82 | ILE323 | 0.0000 |
| 1349     | CG2  | -7.1399 | 10.2080 | -5.6937  | C.3   | 82 | ILE323 | 0.0000 |
| 1350     | CD1  | -6.0565 | 8.4162  | -8.2458  | C.3   | 82 | ILE323 | 0.0000 |
| 1351     | H    | -3.2159 | 10.7406 | -6.7680  | H     | 82 | ILE323 | 0.0000 |
| 1352     | HA   | -5.5899 | 12.3609 | -6.8284  | H     | 82 | ILE323 | 0.0000 |
| 1353     | HB   | -5.1234 | 9.4763  | -5.9042  | H     | 82 | ILE323 | 0.0000 |
| 1354     | HG13 | -4.9556 | 10.2433 | -8.4414  | H     | 82 | ILE323 | 0.0000 |
| 1355     | HG12 | -6.7107 | 10.4921 | -8.3212  | H     | 82 | ILE323 | 0.0000 |
| 1356     | HG23 | -7.0348 | 10.2764 | -4.5999  | H     | 82 | ILE323 | 0.0000 |
| 1357     | HG22 | -7.6802 | 9.2765  | -5.9123  | H     | 82 | ILE323 | 0.0000 |
| 1358     | HG21 | -7.7516 | 11.0562 | -6.0349  | H     | 82 | ILE323 | 0.0000 |
| 1359     | HD13 | -5.1650 | 7.8398  | -7.9620  | H     | 82 | ILE323 | 0.0000 |
| 1360     | HD12 | -6.2045 | 8.2950  | -9.3311  | H     | 82 | ILE323 | 0.0000 |
| 1361     | HD11 | -6.9252 | 7.9853  | -7.7304  | H     | 82 | ILE323 | 0.0000 |
| 1362     | N    | -4.3913 | 11.5442 | -3.8210  | N.am  | 83 | ARG324 | 0.0000 |
| BACKBONE |      |         |         |          |       |    |        |        |
| 1363     | CA   | -4.5441 | 11.9070 | -2.4153  | C.3   | 83 | ARG324 | 0.0000 |
| BACKBONE |      |         |         |          |       |    |        |        |
| 1364     | C    | -4.3907 | 13.3974 | -2.2138  | C.2   | 83 | ARG324 | 0.0000 |
| BACKBONE |      |         |         |          |       |    |        |        |
| 1365     | O    | -5.1596 | 13.9597 | -1.4496  | O.2   | 83 | ARG324 | 0.0000 |
| BACKBONE |      |         |         |          |       |    |        |        |
| 1366     | CB   | -3.5398 | 11.1333 | -1.5126  | C.3   | 83 | ARG324 | 0.0000 |
| 1367     | CG   | -3.7228 | 11.4895 | -0.0111  | C.3   | 83 | ARG324 | 0.0000 |
| 1368     | CD   | -3.0216 | 10.4691 | 0.9276   | C.3   | 83 | ARG324 | 0.0000 |
| 1369     | NE   | -1.5846 | 10.3134 | 0.6748   | N.pl3 | 83 | ARG324 | 0.0000 |
| 1370     | CZ   | -0.6518 | 11.1062 | 1.1638   | C.cat | 83 | ARG324 | 1.0000 |
| 1371     | NH1  | -0.9127 | 12.1941 | 1.8528   | N.pl3 | 83 | ARG324 | 0.0000 |
| 1372     | NH2  | 0.6087  | 10.7930 | 0.9600   | N.pl3 | 83 | ARG324 | 0.0000 |
| 1373     | H    | -3.7102 | 10.8583 | -4.0731  | H     | 83 | ARG324 | 0.0000 |
| 1374     | HA   | -5.5648 | 11.6112 | -2.1178  | H     | 83 | ARG324 | 0.0000 |
| 1375     | HB3  | -2.5040 | 11.3584 | -1.8122  | H     | 83 | ARG324 | 0.0000 |
| 1376     | HB2  | -3.7129 | 10.0548 | -1.6609  | H     | 83 | ARG324 | 0.0000 |
| 1377     | HG3  | -4.7973 | 11.4881 | 0.2368   | H     | 83 | ARG324 | 0.0000 |
| 1378     | HG2  | -3.3397 | 12.5050 | 0.1668   | H     | 83 | ARG324 | 0.0000 |
| 1379     | HD3  | -3.5026 | 9.4907  | 0.7544   | H     | 83 | ARG324 | 0.0000 |

|          |      |         |         |         |      |    |        |        |
|----------|------|---------|---------|---------|------|----|--------|--------|
| 1380     | HD2  | -3.2211 | 10.7006 | 1.9857  | H    | 83 | ARG324 | 0.0000 |
| 1381     | HE   | -1.2978 | 9.4878  | 0.1223  | H    | 83 | ARG324 | 0.0000 |
| 1382     | HH11 | -1.8733 | 12.5019 | 2.0390  | H    | 83 | ARG324 | 0.0000 |
| 1383     | HH12 | -0.1497 | 12.7800 | 2.2244  | H    | 83 | ARG324 | 0.0000 |
| 1384     | HH21 | 0.8715  | 9.9368  | 0.4484  | H    | 83 | ARG324 | 0.0000 |
| 1385     | HH22 | 1.3716  | 11.3849 | 1.3223  | H    | 83 | ARG324 | 0.0000 |
| 1386     | N    | -3.4089 | 14.0527 | -2.8749 | N.am | 84 | ILE325 | 0.0000 |
| BACKBONE |      |         |         |         |      |    |        |        |
| 1387     | CA   | -3.1682 | 15.4729 | -2.6175 | C.3  | 84 | ILE325 | 0.0000 |
| BACKBONE |      |         |         |         |      |    |        |        |
| 1388     | C    | -4.0544 | 16.3376 | -3.4915 | C.2  | 84 | ILE325 | 0.0000 |
| BACKBONE |      |         |         |         |      |    |        |        |
| 1389     | O    | -4.7765 | 17.1639 | -2.9554 | O.2  | 84 | ILE325 | 0.0000 |
| BACKBONE |      |         |         |         |      |    |        |        |
| 1390     | CB   | -1.6617 | 15.8347 | -2.7952 | C.3  | 84 | ILE325 | 0.0000 |
| 1391     | CG1  | -0.7155 | 14.9339 | -1.9359 | C.3  | 84 | ILE325 | 0.0000 |
| 1392     | CG2  | -1.4240 | 17.3470 | -2.5170 | C.3  | 84 | ILE325 | 0.0000 |
| 1393     | CD1  | -0.9411 | 14.9886 | -0.4018 | C.3  | 84 | ILE325 | 0.0000 |
| 1394     | H    | -2.8388 | 13.5802 | -3.5492 | H    | 84 | ILE325 | 0.0000 |
| 1395     | HA   | -3.4203 | 15.7079 | -1.5712 | H    | 84 | ILE325 | 0.0000 |
| 1396     | HB   | -1.3909 | 15.6554 | -3.8507 | H    | 84 | ILE325 | 0.0000 |
| 1397     | HG13 | 0.3247  | 15.2421 | -2.1196 | H    | 84 | ILE325 | 0.0000 |
| 1398     | HG12 | -0.8018 | 13.8829 | -2.2518 | H    | 84 | ILE325 | 0.0000 |
| 1399     | HG23 | -1.9347 | 17.9641 | -3.2720 | H    | 84 | ILE325 | 0.0000 |
| 1400     | HG22 | -0.3514 | 17.5860 | -2.5560 | H    | 84 | ILE325 | 0.0000 |
| 1401     | HG21 | -1.8068 | 17.6344 | -1.5270 | H    | 84 | ILE325 | 0.0000 |
| 1402     | HD13 | -0.8343 | 16.0139 | -0.0195 | H    | 84 | ILE325 | 0.0000 |
| 1403     | HD12 | -0.1884 | 14.3606 | 0.0997  | H    | 84 | ILE325 | 0.0000 |
| 1404     | HD11 | -1.9325 | 14.6036 | -0.1264 | H    | 84 | ILE325 | 0.0000 |
| 1405     | N    | -4.0059 | 16.1854 | -4.8351 | N.am | 85 | LYS326 | 0.0000 |
| BACKBONE |      |         |         |         |      |    |        |        |
| 1406     | CA   | -4.7340 | 17.0999 | -5.7205 | C.3  | 85 | LYS326 | 0.0000 |
| BACKBONE |      |         |         |         |      |    |        |        |
| 1407     | C    | -6.1785 | 16.6955 | -5.9378 | C.2  | 85 | LYS326 | 0.0000 |
| BACKBONE |      |         |         |         |      |    |        |        |
| 1408     | O    | -6.9819 | 17.5798 | -6.1919 | O.2  | 85 | LYS326 | 0.0000 |
| BACKBONE |      |         |         |         |      |    |        |        |
| 1409     | CB   | -3.9964 | 17.2384 | -7.0815 | C.3  | 85 | LYS326 | 0.0000 |
| 1410     | CG   | -2.5415 | 17.7841 | -6.9562 | C.3  | 85 | LYS326 | 0.0000 |
| 1411     | CD   | -2.4078 | 19.2256 | -6.3808 | C.3  | 85 | LYS326 | 0.0000 |
| 1412     | CE   | -3.0782 | 20.3138 | -7.2647 | C.3  | 85 | LYS326 | 0.0000 |
| 1413     | NZ   | -2.8125 | 21.6726 | -6.7372 | N.4  | 85 | LYS326 | 1.0000 |
| 1414     | H    | -3.4608 | 15.4523 | -5.2433 | H    | 85 | LYS326 | 0.0000 |
| 1415     | HA   | -4.7751 | 18.1008 | -5.2636 | H    | 85 | LYS326 | 0.0000 |
| 1416     | HB3  | -4.5730 | 17.9040 | -7.7351 | H    | 85 | LYS326 | 0.0000 |
| 1417     | HB2  | -3.9730 | 16.2479 | -7.5655 | H    | 85 | LYS326 | 0.0000 |
| 1418     | HG3  | -2.0834 | 17.7787 | -7.9593 | H    | 85 | LYS326 | 0.0000 |
| 1419     | HG2  | -1.9552 | 17.1034 | -6.3179 | H    | 85 | LYS326 | 0.0000 |
| 1420     | HD3  | -1.3359 | 19.4659 | -6.3165 | H    | 85 | LYS326 | 0.0000 |
| 1421     | HD2  | -2.8030 | 19.2831 | -5.3564 | H    | 85 | LYS326 | 0.0000 |
| 1422     | HE3  | -4.1692 | 20.1628 | -7.2996 | H    | 85 | LYS326 | 0.0000 |
| 1423     | HE2  | -2.6857 | 20.2382 | -8.2926 | H    | 85 | LYS326 | 0.0000 |

|          |      |          |         |          |       |    |        |         |
|----------|------|----------|---------|----------|-------|----|--------|---------|
| 1424     | HZ3  | -3.2111  | 21.7970 | -5.7391  | H     | 85 | LYS326 | 0.0000  |
| 1425     | HZ2  | -3.2696  | 22.4321 | -7.3580  | H     | 85 | LYS326 | 0.0000  |
| 1426     | HZ1  | -1.7546  | 21.8946 | -6.6969  | H     | 85 | LYS326 | 0.0000  |
| 1427     | N    | -6.5508  | 15.3974 | -5.8467  | N.am  | 86 | GLY327 | 0.0000  |
| BACKBONE |      |          |         |          |       |    |        |         |
| 1428     | CA   | -7.9560  | 15.0144 | -6.0130  | C.3   | 86 | GLY327 | 0.0000  |
| BACKBONE |      |          |         |          |       |    |        |         |
| 1429     | C    | -8.2719  | 14.7624 | -7.4666  | C.2   | 86 | GLY327 | 0.0000  |
| BACKBONE |      |          |         |          |       |    |        |         |
| 1430     | O    | -7.6094  | 15.3390 | -8.3125  | O.2   | 86 | GLY327 | 0.0000  |
| BACKBONE |      |          |         |          |       |    |        |         |
| 1431     | H    | -5.8770  | 14.6756 | -5.6829  | H     | 86 | GLY327 | 0.0000  |
| 1432     | HA2  | -8.6370  | 15.7936 | -5.6368  | H     | 86 | GLY327 | 0.0000  |
| 1433     | HA3  | -8.1547  | 14.1003 | -5.4310  | H     | 86 | GLY327 | 0.0000  |
| 1434     | N    | -9.2803  | 13.9141 | -7.7805  | N.am  | 87 | GLN328 | 0.0000  |
| BACKBONE |      |          |         |          |       |    |        |         |
| 1435     | CA   | -9.5430  | 13.5699 | -9.1779  | C.3   | 87 | GLN328 | 0.0000  |
| BACKBONE |      |          |         |          |       |    |        |         |
| 1436     | C    | -10.1190 | 14.7236 | -9.9672  | C.2   | 87 | GLN328 | 0.0000  |
| BACKBONE |      |          |         |          |       |    |        |         |
| 1437     | O    | -9.9068  | 14.7335 | -11.1684 | O.2   | 87 | GLN328 | 0.0000  |
| BACKBONE |      |          |         |          |       |    |        |         |
| 1438     | CB   | -10.4813 | 12.3416 | -9.3272  | C.3   | 87 | GLN328 | 0.0000  |
| 1439     | CG   | -9.7941  | 11.0278 | -8.8671  | C.3   | 87 | GLN328 | 0.0000  |
| 1440     | CD   | -10.7022 | 9.8235  | -8.9535  | C.2   | 87 | GLN328 | 0.0000  |
| 1441     | OE1  | -11.9091 | 9.9816  | -9.0604  | O.2   | 87 | GLN328 | 0.0000  |
| 1442     | NE2  | -10.1413 | 8.5952  | -8.9012  | N.am  | 87 | GLN328 | 0.0000  |
| 1443     | H    | -9.8520  | 13.5061 | -7.0661  | H     | 87 | GLN328 | 0.0000  |
| 1444     | HA   | -8.5808  | 13.3038 | -9.6435  | H     | 87 | GLN328 | 0.0000  |
| 1445     | HB3  | -10.7415 | 12.2198 | -10.3908 | H     | 87 | GLN328 | 0.0000  |
| 1446     | HB2  | -11.4065 | 12.5231 | -8.7574  | H     | 87 | GLN328 | 0.0000  |
| 1447     | HG3  | -9.4649  | 11.1250 | -7.8229  | H     | 87 | GLN328 | 0.0000  |
| 1448     | HG2  | -8.9098  | 10.8506 | -9.4997  | H     | 87 | GLN328 | 0.0000  |
| 1449     | HE21 | -9.1509  | 8.4819  | -8.8174  | H     | 87 | GLN328 | 0.0000  |
| 1450     | HE22 | -10.7191 | 7.7793  | -8.9498  | H     | 87 | GLN328 | 0.0000  |
| 1451     | N    | -10.8351 | 15.7031 | -9.3703  | N.am  | 88 | GLU329 | 0.0000  |
| BACKBONE |      |          |         |          |       |    |        |         |
| 1452     | CA   | -11.3124 | 16.8278 | -10.1792 | C.3   | 88 | GLU329 | 0.0000  |
| BACKBONE |      |          |         |          |       |    |        |         |
| 1453     | C    | -10.1187 | 17.5138 | -10.8107 | C.2   | 88 | GLU329 | 0.0000  |
| BACKBONE |      |          |         |          |       |    |        |         |
| 1454     | O    | -10.1317 | 17.7412 | -12.0097 | O.2   | 88 | GLU329 | 0.0000  |
| BACKBONE |      |          |         |          |       |    |        |         |
| 1455     | CB   | -12.1305 | 17.8713 | -9.3682  | C.3   | 88 | GLU329 | 0.0000  |
| 1456     | CG   | -13.5248 | 17.3265 | -8.9547  | C.3   | 88 | GLU329 | 0.0000  |
| 1457     | CD   | -14.3367 | 18.3230 | -8.1650  | C.2   | 88 | GLU329 | 0.0000  |
| 1458     | OE1  | -13.7915 | 19.3911 | -7.7751  | O.co2 | 88 | GLU329 | -0.5000 |
| 1459     | OE2  | -15.5427 | 18.0404 | -7.9271  | O.co2 | 88 | GLU329 | -0.5000 |
| 1460     | H    | -11.0199 | 15.6865 | -8.3868  | H     | 88 | GLU329 | 0.0000  |
| 1461     | HA   | -11.9571 | 16.4328 | -10.9828 | H     | 88 | GLU329 | 0.0000  |
| 1462     | HB3  | -12.2863 | 18.7677 | -9.9917  | H     | 88 | GLU329 | 0.0000  |
| 1463     | HB2  | -11.5598 | 18.1687 | -8.4739  | H     | 88 | GLU329 | 0.0000  |



|          |      |          |         |          |      |    |        |        |
|----------|------|----------|---------|----------|------|----|--------|--------|
| 1464     | HG3  | -13.4113 | 16.4154 | -8.3475  | H    | 88 | GLU329 | 0.0000 |
| 1465     | HG2  | -14.0964 | 17.0744 | -9.8621  | H    | 88 | GLU329 | 0.0000 |
| 1466     | N    | -9.0715  | 17.8407 | -10.0193 | N.am | 89 | PHE330 | 0.0000 |
| BACKBONE |      |          |         |          |      |    |        |        |
| 1467     | CA   | -7.8724  | 18.4560 | -10.5944 | C.3  | 89 | PHE330 | 0.0000 |
| BACKBONE |      |          |         |          |      |    |        |        |
| 1468     | C    | -7.3050  | 17.6197 | -11.7185 | C.2  | 89 | PHE330 | 0.0000 |
| BACKBONE |      |          |         |          |      |    |        |        |
| 1469     | O    | -6.8003  | 18.1760 | -12.6803 | O.2  | 89 | PHE330 | 0.0000 |
| BACKBONE |      |          |         |          |      |    |        |        |
| 1470     | CB   | -6.7501  | 18.5693 | -9.5290  | C.3  | 89 | PHE330 | 0.0000 |
| 1471     | CG   | -5.4457  | 19.0985 | -10.1476 | C.ar | 89 | PHE330 | 0.0000 |
| 1472     | CD1  | -5.2852  | 20.4708 | -10.3659 | C.ar | 89 | PHE330 | 0.0000 |
| 1473     | CD2  | -4.4072  | 18.2241 | -10.4941 | C.ar | 89 | PHE330 | 0.0000 |
| 1474     | CE1  | -4.0859  | 20.9695 | -10.8846 | C.ar | 89 | PHE330 | 0.0000 |
| 1475     | CE2  | -3.2008  | 18.7223 | -10.9937 | C.ar | 89 | PHE330 | 0.0000 |
| 1476     | CZ   | -3.0366  | 20.0959 | -11.1860 | C.ar | 89 | PHE330 | 0.0000 |
| 1477     | H    | -9.0993  | 17.6549 | -9.0348  | H    | 89 | PHE330 | 0.0000 |
| 1478     | HA   | -8.1283  | 19.4617 | -10.9676 | H    | 89 | PHE330 | 0.0000 |
| 1479     | HB3  | -6.5765  | 17.5739 | -9.0941  | H    | 89 | PHE330 | 0.0000 |
| 1480     | HB2  | -7.0694  | 19.2386 | -8.7144  | H    | 89 | PHE330 | 0.0000 |
| 1481     | HD1  | -6.0934  | 21.1561 | -10.1321 | H    | 89 | PHE330 | 0.0000 |
| 1482     | HD2  | -4.5310  | 17.1520 | -10.3751 | H    | 89 | PHE330 | 0.0000 |
| 1483     | HE1  | -3.9691  | 22.0353 | -11.0512 | H    | 89 | PHE330 | 0.0000 |
| 1484     | HE2  | -2.3876  | 18.0436 | -11.2324 | H    | 89 | PHE330 | 0.0000 |
| 1485     | HZ   | -2.0971  | 20.4841 | -11.5667 | H    | 89 | PHE330 | 0.0000 |
| 1486     | N    | -7.3561  | 16.2757 | -11.6066 | N.am | 90 | ILE331 | 0.0000 |
| BACKBONE |      |          |         |          |      |    |        |        |
| 1487     | CA   | -6.7398  | 15.4361 | -12.6306 | C.3  | 90 | ILE331 | 0.0000 |
| BACKBONE |      |          |         |          |      |    |        |        |
| 1488     | C    | -7.6109  | 15.4977 | -13.8605 | C.2  | 90 | ILE331 | 0.0000 |
| BACKBONE |      |          |         |          |      |    |        |        |
| 1489     | O    | -7.0931  | 15.7656 | -14.9321 | O.2  | 90 | ILE331 | 0.0000 |
| BACKBONE |      |          |         |          |      |    |        |        |
| 1490     | CB   | -6.5522  | 13.9683 | -12.1507 | C.3  | 90 | ILE331 | 0.0000 |
| 1491     | CG1  | -5.6631  | 13.9384 | -10.8715 | C.3  | 90 | ILE331 | 0.0000 |
| 1492     | CG2  | -5.9456  | 13.0922 | -13.2806 | C.3  | 90 | ILE331 | 0.0000 |
| 1493     | CD1  | -5.5112  | 12.5154 | -10.2783 | C.3  | 90 | ILE331 | 0.0000 |
| 1494     | H    | -7.8320  | 15.8461 | -10.8402 | H    | 90 | ILE331 | 0.0000 |
| 1495     | HA   | -5.7401  | 15.8376 | -12.8695 | H    | 90 | ILE331 | 0.0000 |
| 1496     | HB   | -7.5440  | 13.5548 | -11.9068 | H    | 90 | ILE331 | 0.0000 |
| 1497     | HG13 | -6.1038  | 14.5615 | -10.0844 | H    | 90 | ILE331 | 0.0000 |
| 1498     | HG12 | -4.6783  | 14.3709 | -11.0949 | H    | 90 | ILE331 | 0.0000 |
| 1499     | HG23 | -6.5533  | 13.1382 | -14.1967 | H    | 90 | ILE331 | 0.0000 |
| 1500     | HG22 | -5.9096  | 12.0408 | -12.9664 | H    | 90 | ILE331 | 0.0000 |
| 1501     | HG21 | -4.9263  | 13.4277 | -13.5179 | H    | 90 | ILE331 | 0.0000 |
| 1502     | HD13 | -6.4755  | 11.9874 | -10.2850 | H    | 90 | ILE331 | 0.0000 |
| 1503     | HD12 | -5.1605  | 12.5751 | -9.2396  | H    | 90 | ILE331 | 0.0000 |
| 1504     | HD11 | -4.7798  | 11.9310 | -10.8500 | H    | 90 | ILE331 | 0.0000 |
| 1505     | N    | -8.9346  | 15.2576 | -13.7221 | N.am | 91 | ARG332 | 0.0000 |
| BACKBONE |      |          |         |          |      |    |        |        |

|           |          |         |          |       |           |        |
|-----------|----------|---------|----------|-------|-----------|--------|
| 1506 CA   | -9.8243  | 15.3449 | -14.8759 | C.3   | 91 ARG332 | 0.0000 |
| BACKBONE  |          |         |          |       |           |        |
| 1507 C    | -9.6152  | 16.6781 | -15.5611 | C.2   | 91 ARG332 | 0.0000 |
| BACKBONE  |          |         |          |       |           |        |
| 1508 O    | -9.5444  | 16.7082 | -16.7796 | O.2   | 91 ARG332 | 0.0000 |
| BACKBONE  |          |         |          |       |           |        |
| 1509 CB   | -11.3235 | 15.1939 | -14.4842 | C.3   | 91 ARG332 | 0.0000 |
| 1510 CG   | -11.7147 | 13.7237 | -14.1505 | C.3   | 91 ARG332 | 0.0000 |
| 1511 CD   | -13.2324 | 13.5817 | -13.8401 | C.3   | 91 ARG332 | 0.0000 |
| 1512 NE   | -13.5475 | 13.9840 | -12.4646 | N.pl3 | 91 ARG332 | 0.0000 |
| 1513 CZ   | -13.5053 | 13.1739 | -11.4240 | C.cat | 91 ARG332 | 1.0000 |
| 1514 NH1  | -13.0887 | 11.9284 | -11.4838 | N.pl3 | 91 ARG332 | 0.0000 |
| 1515 NH2  | -13.9039 | 13.6302 | -10.2575 | N.pl3 | 91 ARG332 | 0.0000 |
| 1516 H    | -9.3260  | 15.0336 | -12.8317 | H     | 91 ARG332 | 0.0000 |
| 1517 HA   | -9.5567  | 14.5409 | -15.5805 | H     | 91 ARG332 | 0.0000 |
| 1518 HB3  | -11.9281 | 15.5217 | -15.3462 | H     | 91 ARG332 | 0.0000 |
| 1519 HB2  | -11.5587 | 15.8536 | -13.6340 | H     | 91 ARG332 | 0.0000 |
| 1520 HG3  | -11.1283 | 13.3458 | -13.2985 | H     | 91 ARG332 | 0.0000 |
| 1521 HG2  | -11.4808 | 13.0989 | -15.0285 | H     | 91 ARG332 | 0.0000 |
| 1522 HD3  | -13.6025 | 12.5696 | -14.0640 | H     | 91 ARG332 | 0.0000 |
| 1523 HD2  | -13.7935 | 14.2312 | -14.5323 | H     | 91 ARG332 | 0.0000 |
| 1524 HE   | -13.8763 | 14.9547 | -12.3307 | H     | 91 ARG332 | 0.0000 |
| 1525 HH11 | -12.7225 | 11.5171 | -12.3495 | H     | 91 ARG332 | 0.0000 |
| 1526 HH12 | -13.1016 | 11.3256 | -10.6465 | H     | 91 ARG332 | 0.0000 |
| 1527 HH21 | -14.2476 | 14.5948 | -10.1514 | H     | 91 ARG332 | 0.0000 |
| 1528 HH22 | -13.8924 | 13.0336 | -9.4164  | H     | 91 ARG332 | 0.0000 |
| 1529 N    | -9.5063  | 17.7866 | -14.7929 | N.am  | 92 GLN333 | 0.0000 |
| BACKBONE  |          |         |          |       |           |        |
| 1530 CA   | -9.2845  | 19.0926 | -15.4116 | C.3   | 92 GLN333 | 0.0000 |
| BACKBONE  |          |         |          |       |           |        |
| 1531 C    | -8.0680  | 19.0271 | -16.3106 | C.2   | 92 GLN333 | 0.0000 |
| BACKBONE  |          |         |          |       |           |        |
| 1532 O    | -8.1671  | 19.4094 | -17.4662 | O.2   | 92 GLN333 | 0.0000 |
| BACKBONE  |          |         |          |       |           |        |
| 1533 CB   | -9.0610  | 20.2014 | -14.3434 | C.3   | 92 GLN333 | 0.0000 |
| 1534 CG   | -8.8873  | 21.6161 | -14.9656 | C.3   | 92 GLN333 | 0.0000 |
| 1535 CD   | -8.0778  | 22.4919 | -14.0378 | C.2   | 92 GLN333 | 0.0000 |
| 1536 OE1  | -8.6395  | 23.3586 | -13.3857 | O.2   | 92 GLN333 | 0.0000 |
| 1537 NE2  | -6.7449  | 22.2730 | -13.9606 | N.am  | 92 GLN333 | 0.0000 |
| 1538 H    | -9.5807  | 17.7296 | -13.7966 | H     | 92 GLN333 | 0.0000 |
| 1539 HA   | -10.1801 | 19.3541 | -16.0000 | H     | 92 GLN333 | 0.0000 |
| 1540 HB3  | -8.1630  | 19.9449 | -13.7650 | H     | 92 GLN333 | 0.0000 |
| 1541 HB2  | -9.9077  | 20.2220 | -13.6372 | H     | 92 GLN333 | 0.0000 |
| 1542 HG3  | -9.8751  | 22.0605 | -15.1699 | H     | 92 GLN333 | 0.0000 |
| 1543 HG2  | -8.3445  | 21.5754 | -15.9214 | H     | 92 GLN333 | 0.0000 |
| 1544 HE21 | -6.3033  | 21.5609 | -14.5093 | H     | 92 GLN333 | 0.0000 |
| 1545 HE22 | -6.1805  | 22.8297 | -13.3498 | H     | 92 GLN333 | 0.0000 |
| 1546 N    | -6.9082  | 18.5539 | -15.7973 | N.am  | 93 VAL334 | 0.0000 |
| BACKBONE  |          |         |          |       |           |        |
| 1547 CA   | -5.6962  | 18.5502 | -16.6172 | C.3   | 93 VAL334 | 0.0000 |
| BACKBONE  |          |         |          |       |           |        |

|          |      |         |         |          |      |    |        |        |
|----------|------|---------|---------|----------|------|----|--------|--------|
| 1548     | C    | -5.9142 | 17.6358 | -17.8012 | C.2  | 93 | VAL334 | 0.0000 |
| BACKBONE |      |         |         |          |      |    |        |        |
| 1549     | O    | -5.6480 | 18.0405 | -18.9223 | O.2  | 93 | VAL334 | 0.0000 |
| BACKBONE |      |         |         |          |      |    |        |        |
| 1550     | CB   | -4.4262 | 18.1292 | -15.8164 | C.3  | 93 | VAL334 | 0.0000 |
| 1551     | CG1  | -3.2212 | 17.8949 | -16.7734 | C.3  | 93 | VAL334 | 0.0000 |
| 1552     | CG2  | -4.0712 | 19.2057 | -14.7498 | C.3  | 93 | VAL334 | 0.0000 |
| 1553     | H    | -6.8689 | 18.1918 | -14.8643 | H    | 93 | VAL334 | 0.0000 |
| 1554     | HA   | -5.5304 | 19.5739 | -16.9933 | H    | 93 | VAL334 | 0.0000 |
| 1555     | HB   | -4.6340 | 17.1791 | -15.2960 | H    | 93 | VAL334 | 0.0000 |
| 1556     | HG13 | -3.3988 | 17.0246 | -17.4237 | H    | 93 | VAL334 | 0.0000 |
| 1557     | HG12 | -2.2975 | 17.7026 | -16.2089 | H    | 93 | VAL334 | 0.0000 |
| 1558     | HG11 | -3.0628 | 18.7781 | -17.4101 | H    | 93 | VAL334 | 0.0000 |
| 1559     | HG23 | -3.8286 | 20.1635 | -15.2342 | H    | 93 | VAL334 | 0.0000 |
| 1560     | HG22 | -3.2036 | 18.8884 | -14.1548 | H    | 93 | VAL334 | 0.0000 |
| 1561     | HG21 | -4.9057 | 19.3740 | -14.0545 | H    | 93 | VAL334 | 0.0000 |
| 1562     | N    | -6.4016 | 16.3973 | -17.5681 | N.am | 94 | GLN335 | 0.0000 |
| BACKBONE |      |         |         |          |      |    |        |        |
| 1563     | CA   | -6.6556 | 15.4818 | -18.6797 | C.3  | 94 | GLN335 | 0.0000 |
| BACKBONE |      |         |         |          |      |    |        |        |
| 1564     | C    | -7.7356 | 16.0463 | -19.5670 | C.2  | 94 | GLN335 | 0.0000 |
| BACKBONE |      |         |         |          |      |    |        |        |
| 1565     | O    | -8.3567 | 17.0505 | -19.2588 | O.2  | 94 | GLN335 | 0.0000 |
| BACKBONE |      |         |         |          |      |    |        |        |
| 1566     | CB   | -7.0989 | 14.0746 | -18.1896 | C.3  | 94 | GLN335 | 0.0000 |
| 1567     | CG   | -5.9414 | 13.3052 | -17.4931 | C.3  | 94 | GLN335 | 0.0000 |
| 1568     | CD   | -4.8731 | 12.8758 | -18.4753 | C.2  | 94 | GLN335 | 0.0000 |
| 1569     | OE1  | -5.2173 | 12.4457 | -19.5664 | O.2  | 94 | GLN335 | 0.0000 |
| 1570     | NE2  | -3.5693 | 12.9606 | -18.1323 | N.am | 94 | GLN335 | 0.0000 |
| 1571     | H    | -6.6214 | 16.1067 | -16.6381 | H    | 94 | GLN335 | 0.0000 |
| 1572     | HA   | -5.7449 | 15.3771 | -19.2913 | H    | 94 | GLN335 | 0.0000 |
| 1573     | HB3  | -7.4705 | 13.4801 | -19.0404 | H    | 94 | GLN335 | 0.0000 |
| 1574     | HB2  | -7.9373 | 14.2003 | -17.4862 | H    | 94 | GLN335 | 0.0000 |
| 1575     | HG3  | -6.3478 | 12.3872 | -17.0391 | H    | 94 | GLN335 | 0.0000 |
| 1576     | HG2  | -5.5198 | 13.9215 | -16.6841 | H    | 94 | GLN335 | 0.0000 |
| 1577     | HE21 | -3.2848 | 13.3159 | -17.2429 | H    | 94 | GLN335 | 0.0000 |
| 1578     | HE22 | -2.8652 | 12.6631 | -18.7789 | H    | 94 | GLN335 | 0.0000 |

@<TRIPOS>BOND

|    |    |    |    |                     |
|----|----|----|----|---------------------|
| 1  | 1  | 2  | 1  | BACKBONE            |
| 2  | 1  | 7  | 1  |                     |
| 3  | 1  | 12 | 1  |                     |
| 4  | 2  | 3  | 1  | BACKBONE            |
| 5  | 2  | 5  | 1  |                     |
| 6  | 2  | 8  | 1  |                     |
| 7  | 3  | 4  | 2  | BACKBONE            |
| 8  | 3  | 13 | am | BACKBONE   INTERRES |
| 9  | 5  | 6  | 1  |                     |
| 10 | 5  | 9  | 1  |                     |
| 11 | 5  | 10 | 1  |                     |
| 12 | 6  | 11 | 1  |                     |
| 13 | 13 | 14 | 1  | BACKBONE            |
| 14 | 13 | 21 | 1  |                     |

|    |    |    |    |                     |
|----|----|----|----|---------------------|
| 15 | 14 | 15 | 1  | BACKBONE            |
| 16 | 14 | 17 | 1  |                     |
| 17 | 14 | 22 | 1  |                     |
| 18 | 15 | 16 | 2  | BACKBONE            |
| 19 | 15 | 32 | am | BACKBONE   INTERRES |
| 20 | 17 | 18 | 1  |                     |
| 21 | 17 | 23 | 1  |                     |
| 22 | 17 | 24 | 1  |                     |
| 23 | 18 | 19 | 1  |                     |
| 24 | 18 | 25 | 1  |                     |
| 25 | 18 | 26 | 1  |                     |
| 26 | 19 | 20 | 1  |                     |
| 27 | 19 | 27 | 1  |                     |
| 28 | 19 | 28 | 1  |                     |
| 29 | 20 | 29 | 1  |                     |
| 30 | 20 | 30 | 1  |                     |
| 31 | 20 | 31 | 1  |                     |
| 32 | 32 | 33 | 1  | BACKBONE            |
| 33 | 32 | 43 | 1  |                     |
| 34 | 33 | 34 | 1  | BACKBONE            |
| 35 | 33 | 36 | 1  |                     |
| 36 | 33 | 44 | 1  |                     |
| 37 | 34 | 35 | 2  | BACKBONE            |
| 38 | 34 | 56 | am | BACKBONE   INTERRES |
| 39 | 36 | 37 | 1  |                     |
| 40 | 36 | 45 | 1  |                     |
| 41 | 36 | 46 | 1  |                     |
| 42 | 37 | 38 | 1  |                     |
| 43 | 37 | 47 | 1  |                     |
| 44 | 37 | 48 | 1  |                     |
| 45 | 38 | 39 | 1  |                     |
| 46 | 38 | 49 | 1  |                     |
| 47 | 38 | 50 | 1  |                     |
| 48 | 39 | 40 | ar |                     |
| 49 | 39 | 51 | 1  |                     |
| 50 | 40 | 41 | ar |                     |
| 51 | 40 | 42 | ar |                     |
| 52 | 41 | 52 | 1  |                     |
| 53 | 41 | 53 | 1  |                     |
| 54 | 42 | 54 | 1  |                     |
| 55 | 42 | 55 | 1  |                     |
| 56 | 56 | 57 | 1  | BACKBONE            |
| 57 | 56 | 68 | 1  |                     |
| 58 | 57 | 58 | 1  | BACKBONE            |
| 59 | 57 | 60 | 1  |                     |
| 60 | 57 | 69 | 1  |                     |
| 61 | 58 | 59 | 2  | BACKBONE            |
| 62 | 58 | 77 | am | BACKBONE   INTERRES |
| 63 | 60 | 61 | 1  |                     |
| 64 | 60 | 70 | 1  |                     |
| 65 | 60 | 71 | 1  |                     |
| 66 | 61 | 62 | ar |                     |

|     |     |     |    |                     |
|-----|-----|-----|----|---------------------|
| 67  | 61  | 63  | ar |                     |
| 68  | 62  | 64  | ar |                     |
| 69  | 62  | 72  | 1  |                     |
| 70  | 63  | 65  | ar |                     |
| 71  | 63  | 73  | 1  |                     |
| 72  | 64  | 66  | ar |                     |
| 73  | 64  | 74  | 1  |                     |
| 74  | 65  | 66  | ar |                     |
| 75  | 65  | 75  | 1  |                     |
| 76  | 66  | 67  | 1  |                     |
| 77  | 67  | 76  | 1  |                     |
| 78  | 77  | 78  | 1  | BACKBONE            |
| 79  | 77  | 84  | 1  |                     |
| 80  | 78  | 79  | 1  | BACKBONE            |
| 81  | 78  | 81  | 1  |                     |
| 82  | 78  | 85  | 1  |                     |
| 83  | 79  | 80  | 2  | BACKBONE            |
| 84  | 79  | 91  | am | BACKBONE   INTERRES |
| 85  | 81  | 82  | 1  |                     |
| 86  | 81  | 83  | 1  |                     |
| 87  | 81  | 86  | 1  |                     |
| 88  | 82  | 87  | 1  |                     |
| 89  | 83  | 88  | 1  |                     |
| 90  | 83  | 89  | 1  |                     |
| 91  | 83  | 90  | 1  |                     |
| 92  | 91  | 92  | 1  | BACKBONE            |
| 93  | 91  | 98  | 1  |                     |
| 94  | 92  | 93  | 1  | BACKBONE            |
| 95  | 92  | 95  | 1  |                     |
| 96  | 92  | 99  | 1  |                     |
| 97  | 93  | 94  | 2  | BACKBONE            |
| 98  | 93  | 107 | am | BACKBONE   INTERRES |
| 99  | 95  | 96  | 1  |                     |
| 100 | 95  | 97  | 1  |                     |
| 101 | 95  | 100 | 1  |                     |
| 102 | 96  | 101 | 1  |                     |
| 103 | 96  | 102 | 1  |                     |
| 104 | 96  | 103 | 1  |                     |
| 105 | 97  | 104 | 1  |                     |
| 106 | 97  | 105 | 1  |                     |
| 107 | 97  | 106 | 1  |                     |
| 108 | 107 | 108 | 1  | BACKBONE            |
| 109 | 107 | 113 | 1  |                     |
| 110 | 108 | 109 | 1  | BACKBONE            |
| 111 | 108 | 111 | 1  |                     |
| 112 | 108 | 114 | 1  |                     |
| 113 | 109 | 110 | 2  | BACKBONE            |
| 114 | 109 | 118 | am | BACKBONE   INTERRES |
| 115 | 111 | 112 | 1  |                     |
| 116 | 111 | 115 | 1  |                     |
| 117 | 111 | 116 | 1  |                     |
| 118 | 112 | 117 | 1  |                     |

|     |     |     |    |                     |
|-----|-----|-----|----|---------------------|
| 119 | 118 | 119 | 1  | BACKBONE            |
| 120 | 118 | 126 | 1  |                     |
| 121 | 119 | 120 | 1  | BACKBONE            |
| 122 | 119 | 122 | 1  |                     |
| 123 | 119 | 127 | 1  |                     |
| 124 | 120 | 121 | 2  | BACKBONE            |
| 125 | 120 | 132 | am | BACKBONE   INTERRES |
| 126 | 122 | 123 | 1  |                     |
| 127 | 122 | 128 | 1  |                     |
| 128 | 122 | 129 | 1  |                     |
| 129 | 123 | 124 | 2  |                     |
| 130 | 123 | 125 | am |                     |
| 131 | 125 | 130 | 1  |                     |
| 132 | 125 | 131 | 1  |                     |
| 133 | 132 | 133 | 1  | BACKBONE            |
| 134 | 132 | 140 | 1  |                     |
| 135 | 133 | 134 | 1  | BACKBONE            |
| 136 | 133 | 136 | 1  |                     |
| 137 | 133 | 141 | 1  |                     |
| 138 | 134 | 135 | 2  | BACKBONE            |
| 139 | 134 | 151 | am | BACKBONE   INTERRES |
| 140 | 136 | 137 | 1  |                     |
| 141 | 136 | 142 | 1  |                     |
| 142 | 136 | 143 | 1  |                     |
| 143 | 137 | 138 | 1  |                     |
| 144 | 137 | 139 | 1  |                     |
| 145 | 137 | 144 | 1  |                     |
| 146 | 138 | 145 | 1  |                     |
| 147 | 138 | 146 | 1  |                     |
| 148 | 138 | 147 | 1  |                     |
| 149 | 139 | 148 | 1  |                     |
| 150 | 139 | 149 | 1  |                     |
| 151 | 139 | 150 | 1  |                     |
| 152 | 151 | 152 | 1  | BACKBONE            |
| 153 | 151 | 157 | 1  |                     |
| 154 | 152 | 153 | 1  | BACKBONE            |
| 155 | 152 | 155 | 1  |                     |
| 156 | 152 | 158 | 1  |                     |
| 157 | 153 | 154 | 2  | BACKBONE            |
| 158 | 153 | 162 | am | BACKBONE   INTERRES |
| 159 | 155 | 156 | 1  |                     |
| 160 | 155 | 159 | 1  |                     |
| 161 | 155 | 160 | 1  |                     |
| 162 | 156 | 161 | 1  |                     |
| 163 | 162 | 163 | 1  | BACKBONE            |
| 164 | 162 | 170 | 1  |                     |
| 165 | 163 | 164 | 1  | BACKBONE            |
| 166 | 163 | 166 | 1  |                     |
| 167 | 163 | 171 | 1  |                     |
| 168 | 164 | 165 | 2  | BACKBONE            |
| 169 | 164 | 181 | am | BACKBONE   INTERRES |
| 170 | 166 | 167 | 1  |                     |

|     |     |     |    |                     |
|-----|-----|-----|----|---------------------|
| 171 | 166 | 172 | 1  |                     |
| 172 | 166 | 173 | 1  |                     |
| 173 | 167 | 168 | 1  |                     |
| 174 | 167 | 174 | 1  |                     |
| 175 | 167 | 175 | 1  |                     |
| 176 | 168 | 169 | 1  |                     |
| 177 | 168 | 176 | 1  |                     |
| 178 | 168 | 177 | 1  |                     |
| 179 | 169 | 178 | 1  |                     |
| 180 | 169 | 179 | 1  |                     |
| 181 | 169 | 180 | 1  |                     |
| 182 | 181 | 182 | 1  | BACKBONE            |
| 183 | 181 | 190 | 1  |                     |
| 184 | 182 | 183 | 1  | BACKBONE            |
| 185 | 182 | 185 | 1  |                     |
| 186 | 182 | 191 | 1  |                     |
| 187 | 183 | 184 | 2  | BACKBONE            |
| 188 | 183 | 198 | am | BACKBONE   INTERRES |
| 189 | 185 | 186 | 1  |                     |
| 190 | 185 | 192 | 1  |                     |
| 191 | 185 | 193 | 1  |                     |
| 192 | 186 | 187 | 1  |                     |
| 193 | 186 | 194 | 1  |                     |
| 194 | 186 | 195 | 1  |                     |
| 195 | 187 | 188 | 2  |                     |
| 196 | 187 | 189 | am |                     |
| 197 | 189 | 196 | 1  |                     |
| 198 | 189 | 197 | 1  |                     |
| 199 | 198 | 199 | 1  | BACKBONE            |
| 200 | 198 | 205 | 1  |                     |
| 201 | 199 | 200 | 1  | BACKBONE            |
| 202 | 199 | 202 | 1  |                     |
| 203 | 199 | 206 | 1  |                     |
| 204 | 200 | 201 | 2  | BACKBONE            |
| 205 | 200 | 212 | am | BACKBONE   INTERRES |
| 206 | 202 | 203 | 1  |                     |
| 207 | 202 | 204 | 1  |                     |
| 208 | 202 | 207 | 1  |                     |
| 209 | 203 | 208 | 1  |                     |
| 210 | 204 | 209 | 1  |                     |
| 211 | 204 | 210 | 1  |                     |
| 212 | 204 | 211 | 1  |                     |
| 213 | 212 | 213 | 1  | BACKBONE            |
| 214 | 212 | 222 | 1  |                     |
| 215 | 213 | 214 | 1  | BACKBONE            |
| 216 | 213 | 216 | 1  |                     |
| 217 | 213 | 223 | 1  |                     |
| 218 | 214 | 215 | 2  | BACKBONE            |
| 219 | 214 | 229 | am | BACKBONE   INTERRES |
| 220 | 216 | 217 | 1  |                     |
| 221 | 216 | 224 | 1  |                     |
| 222 | 216 | 225 | 1  |                     |

|     |     |     |    |                     |
|-----|-----|-----|----|---------------------|
| 223 | 217 | 218 | 1  |                     |
| 224 | 217 | 219 | 2  |                     |
| 225 | 218 | 220 | 1  |                     |
| 226 | 218 | 226 | 1  |                     |
| 227 | 219 | 221 | 1  |                     |
| 228 | 219 | 227 | 1  |                     |
| 229 | 220 | 221 | 2  |                     |
| 230 | 220 | 228 | 1  |                     |
| 231 | 229 | 230 | 1  | BACKBONE            |
| 232 | 229 | 234 | 1  |                     |
| 233 | 230 | 231 | 1  | BACKBONE            |
| 234 | 230 | 233 | 1  |                     |
| 235 | 230 | 235 | 1  |                     |
| 236 | 231 | 232 | 2  | BACKBONE            |
| 237 | 231 | 239 | am | BACKBONE   INTERRES |
| 238 | 233 | 236 | 1  |                     |
| 239 | 233 | 237 | 1  |                     |
| 240 | 233 | 238 | 1  |                     |
| 241 | 239 | 240 | 1  | BACKBONE            |
| 242 | 239 | 244 | 1  |                     |
| 243 | 240 | 241 | 1  | BACKBONE            |
| 244 | 240 | 243 | 1  |                     |
| 245 | 240 | 245 | 1  |                     |
| 246 | 241 | 242 | 2  | BACKBONE            |
| 247 | 241 | 249 | am | BACKBONE   INTERRES |
| 248 | 243 | 246 | 1  |                     |
| 249 | 243 | 247 | 1  |                     |
| 250 | 243 | 248 | 1  |                     |
| 251 | 249 | 250 | 1  | BACKBONE            |
| 252 | 249 | 260 | 1  |                     |
| 253 | 250 | 251 | 1  | BACKBONE            |
| 254 | 250 | 253 | 1  |                     |
| 255 | 250 | 261 | 1  |                     |
| 256 | 251 | 252 | 2  | BACKBONE            |
| 257 | 251 | 273 | am | BACKBONE   INTERRES |
| 258 | 253 | 254 | 1  |                     |
| 259 | 253 | 262 | 1  |                     |
| 260 | 253 | 263 | 1  |                     |
| 261 | 254 | 255 | 1  |                     |
| 262 | 254 | 264 | 1  |                     |
| 263 | 254 | 265 | 1  |                     |
| 264 | 255 | 256 | 1  |                     |
| 265 | 255 | 266 | 1  |                     |
| 266 | 255 | 267 | 1  |                     |
| 267 | 256 | 257 | ar |                     |
| 268 | 256 | 268 | 1  |                     |
| 269 | 257 | 258 | ar |                     |
| 270 | 257 | 259 | ar |                     |
| 271 | 258 | 269 | 1  |                     |
| 272 | 258 | 270 | 1  |                     |
| 273 | 259 | 271 | 1  |                     |
| 274 | 259 | 272 | 1  |                     |



|     |     |     |    |                     |
|-----|-----|-----|----|---------------------|
| 275 | 273 | 274 | 1  | BACKBONE            |
| 276 | 273 | 284 | 1  |                     |
| 277 | 274 | 275 | 1  | BACKBONE            |
| 278 | 274 | 277 | 1  |                     |
| 279 | 274 | 285 | 1  |                     |
| 280 | 275 | 276 | 2  | BACKBONE            |
| 281 | 275 | 293 | am | BACKBONE   INTERRES |
| 282 | 277 | 278 | 1  |                     |
| 283 | 277 | 286 | 1  |                     |
| 284 | 277 | 287 | 1  |                     |
| 285 | 278 | 279 | ar |                     |
| 286 | 278 | 280 | ar |                     |
| 287 | 279 | 281 | ar |                     |
| 288 | 279 | 288 | 1  |                     |
| 289 | 280 | 282 | ar |                     |
| 290 | 280 | 289 | 1  |                     |
| 291 | 281 | 283 | ar |                     |
| 292 | 281 | 290 | 1  |                     |
| 293 | 282 | 283 | ar |                     |
| 294 | 282 | 291 | 1  |                     |
| 295 | 283 | 292 | 1  |                     |
| 296 | 293 | 294 | 1  | BACKBONE            |
| 297 | 293 | 302 | 1  |                     |
| 298 | 294 | 295 | 1  | BACKBONE            |
| 299 | 294 | 297 | 1  |                     |
| 300 | 294 | 303 | 1  |                     |
| 301 | 295 | 296 | 2  | BACKBONE            |
| 302 | 295 | 315 | am | BACKBONE   INTERRES |
| 303 | 297 | 298 | 1  |                     |
| 304 | 297 | 304 | 1  |                     |
| 305 | 297 | 305 | 1  |                     |
| 306 | 298 | 299 | 1  |                     |
| 307 | 298 | 306 | 1  |                     |
| 308 | 298 | 307 | 1  |                     |
| 309 | 299 | 300 | 1  |                     |
| 310 | 299 | 308 | 1  |                     |
| 311 | 299 | 309 | 1  |                     |
| 312 | 300 | 301 | 1  |                     |
| 313 | 300 | 310 | 1  |                     |
| 314 | 300 | 311 | 1  |                     |
| 315 | 301 | 312 | 1  |                     |
| 316 | 301 | 313 | 1  |                     |
| 317 | 301 | 314 | 1  |                     |
| 318 | 315 | 316 | 1  | BACKBONE            |
| 319 | 315 | 322 | 1  |                     |
| 320 | 316 | 317 | 1  | BACKBONE            |
| 321 | 316 | 319 | 1  |                     |
| 322 | 316 | 323 | 1  |                     |
| 323 | 317 | 318 | 2  | BACKBONE            |
| 324 | 317 | 329 | am | BACKBONE   INTERRES |
| 325 | 319 | 320 | 1  |                     |
| 326 | 319 | 321 | 1  |                     |

|     |     |     |    |                     |
|-----|-----|-----|----|---------------------|
| 327 | 319 | 324 | 1  |                     |
| 328 | 320 | 325 | 1  |                     |
| 329 | 321 | 326 | 1  |                     |
| 330 | 321 | 327 | 1  |                     |
| 331 | 321 | 328 | 1  |                     |
| 332 | 329 | 330 | 1  | BACKBONE            |
| 333 | 329 | 340 | 1  |                     |
| 334 | 330 | 331 | 1  | BACKBONE            |
| 335 | 330 | 333 | 1  |                     |
| 336 | 330 | 341 | 1  |                     |
| 337 | 331 | 332 | 2  | BACKBONE            |
| 338 | 331 | 349 | am | BACKBONE   INTERRES |
| 339 | 333 | 334 | 1  |                     |
| 340 | 333 | 342 | 1  |                     |
| 341 | 333 | 343 | 1  |                     |
| 342 | 334 | 335 | ar |                     |
| 343 | 334 | 336 | ar |                     |
| 344 | 335 | 337 | ar |                     |
| 345 | 335 | 344 | 1  |                     |
| 346 | 336 | 338 | ar |                     |
| 347 | 336 | 345 | 1  |                     |
| 348 | 337 | 339 | ar |                     |
| 349 | 337 | 346 | 1  |                     |
| 350 | 338 | 339 | ar |                     |
| 351 | 338 | 347 | 1  |                     |
| 352 | 339 | 348 | 1  |                     |
| 353 | 349 | 350 | 1  | BACKBONE            |
| 354 | 349 | 360 | 1  |                     |
| 355 | 350 | 351 | 1  | BACKBONE            |
| 356 | 350 | 353 | 1  |                     |
| 357 | 350 | 361 | 1  |                     |
| 358 | 351 | 352 | 2  | BACKBONE            |
| 359 | 351 | 369 | am | BACKBONE   INTERRES |
| 360 | 353 | 354 | 1  |                     |
| 361 | 353 | 362 | 1  |                     |
| 362 | 353 | 363 | 1  |                     |
| 363 | 354 | 355 | ar |                     |
| 364 | 354 | 356 | ar |                     |
| 365 | 355 | 357 | ar |                     |
| 366 | 355 | 364 | 1  |                     |
| 367 | 356 | 358 | ar |                     |
| 368 | 356 | 365 | 1  |                     |
| 369 | 357 | 359 | ar |                     |
| 370 | 357 | 366 | 1  |                     |
| 371 | 358 | 359 | ar |                     |
| 372 | 358 | 367 | 1  |                     |
| 373 | 359 | 368 | 1  |                     |
| 374 | 369 | 370 | 1  | BACKBONE            |
| 375 | 369 | 377 | 1  |                     |
| 376 | 370 | 371 | 1  | BACKBONE            |
| 377 | 370 | 373 | 1  |                     |
| 378 | 370 | 378 | 1  |                     |

|     |     |     |    |                     |
|-----|-----|-----|----|---------------------|
| 379 | 371 | 372 | 2  | BACKBONE            |
| 380 | 371 | 383 | am | BACKBONE   INTERRES |
| 381 | 373 | 374 | 1  |                     |
| 382 | 373 | 379 | 1  |                     |
| 383 | 373 | 380 | 1  |                     |
| 384 | 374 | 375 | 2  |                     |
| 385 | 374 | 376 | am |                     |
| 386 | 376 | 381 | 1  |                     |
| 387 | 376 | 382 | 1  |                     |
| 388 | 383 | 384 | 1  | BACKBONE            |
| 389 | 383 | 397 | 1  |                     |
| 390 | 384 | 385 | 1  | BACKBONE            |
| 391 | 384 | 387 | 1  |                     |
| 392 | 384 | 398 | 1  |                     |
| 393 | 385 | 386 | 2  | BACKBONE            |
| 394 | 385 | 407 | am | BACKBONE   INTERRES |
| 395 | 387 | 388 | 1  |                     |
| 396 | 387 | 399 | 1  |                     |
| 397 | 387 | 400 | 1  |                     |
| 398 | 388 | 389 | 2  |                     |
| 399 | 388 | 390 | 1  |                     |
| 400 | 389 | 391 | 1  |                     |
| 401 | 389 | 401 | 1  |                     |
| 402 | 390 | 392 | ar |                     |
| 403 | 390 | 393 | ar |                     |
| 404 | 391 | 392 | 1  |                     |
| 405 | 391 | 402 | 1  |                     |
| 406 | 392 | 394 | ar |                     |
| 407 | 393 | 395 | ar |                     |
| 408 | 393 | 403 | 1  |                     |
| 409 | 394 | 396 | ar |                     |
| 410 | 394 | 404 | 1  |                     |
| 411 | 395 | 396 | ar |                     |
| 412 | 395 | 405 | 1  |                     |
| 413 | 396 | 406 | 1  |                     |
| 414 | 407 | 408 | 1  | BACKBONE            |
| 415 | 407 | 413 | 1  |                     |
| 416 | 408 | 409 | 1  | BACKBONE            |
| 417 | 408 | 411 | 1  |                     |
| 418 | 408 | 414 | 1  |                     |
| 419 | 409 | 410 | 2  | BACKBONE            |
| 420 | 409 | 421 | am | BACKBONE   INTERRES |
| 421 | 411 | 412 | 1  |                     |
| 422 | 411 | 415 | 1  |                     |
| 423 | 411 | 416 | 1  |                     |
| 424 | 412 | 413 | 1  |                     |
| 425 | 412 | 417 | 1  |                     |
| 426 | 412 | 418 | 1  |                     |
| 427 | 413 | 419 | 1  |                     |
| 428 | 413 | 420 | 1  |                     |
| 429 | 421 | 422 | 1  | BACKBONE            |
| 430 | 421 | 427 | 1  |                     |

|     |     |     |    |                     |
|-----|-----|-----|----|---------------------|
| 431 | 422 | 423 | 1  | BACKBONE            |
| 432 | 422 | 425 | 1  |                     |
| 433 | 422 | 428 | 1  |                     |
| 434 | 423 | 424 | 2  | BACKBONE            |
| 435 | 423 | 432 | am | BACKBONE   INTERRES |
| 436 | 425 | 426 | 1  |                     |
| 437 | 425 | 429 | 1  |                     |
| 438 | 425 | 430 | 1  |                     |
| 439 | 426 | 431 | 1  |                     |
| 440 | 432 | 433 | 1  | BACKBONE            |
| 441 | 432 | 438 | 1  |                     |
| 442 | 433 | 434 | 1  | BACKBONE            |
| 443 | 433 | 436 | 1  |                     |
| 444 | 433 | 439 | 1  |                     |
| 445 | 434 | 435 | 2  | BACKBONE            |
| 446 | 434 | 443 | am | BACKBONE   INTERRES |
| 447 | 436 | 437 | 1  |                     |
| 448 | 436 | 440 | 1  |                     |
| 449 | 436 | 441 | 1  |                     |
| 450 | 437 | 442 | 1  |                     |
| 451 | 443 | 444 | 1  | BACKBONE            |
| 452 | 443 | 450 | 1  |                     |
| 453 | 444 | 445 | 1  | BACKBONE            |
| 454 | 444 | 447 | 1  |                     |
| 455 | 444 | 451 | 1  |                     |
| 456 | 445 | 446 | 2  | BACKBONE            |
| 457 | 445 | 459 | am | BACKBONE   INTERRES |
| 458 | 447 | 448 | 1  |                     |
| 459 | 447 | 449 | 1  |                     |
| 460 | 447 | 452 | 1  |                     |
| 461 | 448 | 453 | 1  |                     |
| 462 | 448 | 454 | 1  |                     |
| 463 | 448 | 455 | 1  |                     |
| 464 | 449 | 456 | 1  |                     |
| 465 | 449 | 457 | 1  |                     |
| 466 | 449 | 458 | 1  |                     |
| 467 | 459 | 460 | 1  | BACKBONE            |
| 468 | 459 | 467 | 1  |                     |
| 469 | 460 | 461 | 1  | BACKBONE            |
| 470 | 460 | 463 | 1  |                     |
| 471 | 460 | 468 | 1  |                     |
| 472 | 461 | 462 | 2  | BACKBONE            |
| 473 | 461 | 478 | am | BACKBONE   INTERRES |
| 474 | 463 | 464 | 1  |                     |
| 475 | 463 | 469 | 1  |                     |
| 476 | 463 | 470 | 1  |                     |
| 477 | 464 | 465 | 1  |                     |
| 478 | 464 | 466 | 1  |                     |
| 479 | 464 | 471 | 1  |                     |
| 480 | 465 | 472 | 1  |                     |
| 481 | 465 | 473 | 1  |                     |
| 482 | 465 | 474 | 1  |                     |

|     |     |     |    |                     |
|-----|-----|-----|----|---------------------|
| 483 | 466 | 475 | 1  |                     |
| 484 | 466 | 476 | 1  |                     |
| 485 | 466 | 477 | 1  |                     |
| 486 | 478 | 479 | 1  | BACKBONE            |
| 487 | 478 | 485 | 1  |                     |
| 488 | 479 | 480 | 1  | BACKBONE            |
| 489 | 479 | 482 | 1  |                     |
| 490 | 479 | 486 | 1  |                     |
| 491 | 480 | 481 | 2  | BACKBONE            |
| 492 | 480 | 494 | am | BACKBONE   INTERRES |
| 493 | 482 | 483 | 1  |                     |
| 494 | 482 | 484 | 1  |                     |
| 495 | 482 | 487 | 1  |                     |
| 496 | 483 | 488 | 1  |                     |
| 497 | 483 | 489 | 1  |                     |
| 498 | 483 | 490 | 1  |                     |
| 499 | 484 | 491 | 1  |                     |
| 500 | 484 | 492 | 1  |                     |
| 501 | 484 | 493 | 1  |                     |
| 502 | 494 | 495 | 1  | BACKBONE            |
| 503 | 494 | 502 | 1  |                     |
| 504 | 495 | 496 | 1  | BACKBONE            |
| 505 | 495 | 498 | 1  |                     |
| 506 | 495 | 503 | 1  |                     |
| 507 | 496 | 497 | 2  | BACKBONE            |
| 508 | 496 | 508 | am | BACKBONE   INTERRES |
| 509 | 498 | 499 | 1  |                     |
| 510 | 498 | 504 | 1  |                     |
| 511 | 498 | 505 | 1  |                     |
| 512 | 499 | 500 | 2  |                     |
| 513 | 499 | 501 | am |                     |
| 514 | 501 | 506 | 1  |                     |
| 515 | 501 | 507 | 1  |                     |
| 516 | 508 | 509 | 1  | BACKBONE            |
| 517 | 508 | 514 | 1  |                     |
| 518 | 509 | 510 | 1  | BACKBONE            |
| 519 | 509 | 512 | 1  |                     |
| 520 | 509 | 515 | 1  |                     |
| 521 | 510 | 511 | 2  | BACKBONE            |
| 522 | 510 | 522 | am | BACKBONE   INTERRES |
| 523 | 512 | 513 | 1  |                     |
| 524 | 512 | 516 | 1  |                     |
| 525 | 512 | 517 | 1  |                     |
| 526 | 513 | 514 | 1  |                     |
| 527 | 513 | 518 | 1  |                     |
| 528 | 513 | 519 | 1  |                     |
| 529 | 514 | 520 | 1  |                     |
| 530 | 514 | 521 | 1  |                     |
| 531 | 522 | 523 | 1  | BACKBONE            |
| 532 | 522 | 531 | 1  |                     |
| 533 | 523 | 524 | 1  | BACKBONE            |
| 534 | 523 | 526 | 1  |                     |

|     |     |     |    |                     |
|-----|-----|-----|----|---------------------|
| 535 | 523 | 532 | 1  |                     |
| 536 | 524 | 525 | 2  | BACKBONE            |
| 537 | 524 | 537 | am | BACKBONE   INTERRES |
| 538 | 526 | 527 | 1  |                     |
| 539 | 526 | 533 | 1  |                     |
| 540 | 526 | 534 | 1  |                     |
| 541 | 527 | 528 | 1  |                     |
| 542 | 527 | 535 | 1  |                     |
| 543 | 527 | 536 | 1  |                     |
| 544 | 528 | 529 | ar |                     |
| 545 | 528 | 530 | ar |                     |
| 546 | 537 | 538 | 1  | BACKBONE            |
| 547 | 537 | 546 | 1  |                     |
| 548 | 538 | 539 | 1  | BACKBONE            |
| 549 | 538 | 541 | 1  |                     |
| 550 | 538 | 547 | 1  |                     |
| 551 | 539 | 540 | 2  | BACKBONE            |
| 552 | 539 | 554 | am | BACKBONE   INTERRES |
| 553 | 541 | 542 | 1  |                     |
| 554 | 541 | 548 | 1  |                     |
| 555 | 541 | 549 | 1  |                     |
| 556 | 542 | 543 | 1  |                     |
| 557 | 542 | 550 | 1  |                     |
| 558 | 542 | 551 | 1  |                     |
| 559 | 543 | 544 | 2  |                     |
| 560 | 543 | 545 | am |                     |
| 561 | 545 | 552 | 1  |                     |
| 562 | 545 | 553 | 1  |                     |
| 563 | 554 | 555 | 1  | BACKBONE            |
| 564 | 554 | 562 | 1  |                     |
| 565 | 555 | 556 | 1  | BACKBONE            |
| 566 | 555 | 558 | 1  |                     |
| 567 | 555 | 563 | 1  |                     |
| 568 | 556 | 557 | 2  | BACKBONE            |
| 569 | 556 | 573 | am | BACKBONE   INTERRES |
| 570 | 558 | 559 | 1  |                     |
| 571 | 558 | 564 | 1  |                     |
| 572 | 558 | 565 | 1  |                     |
| 573 | 559 | 560 | 1  |                     |
| 574 | 559 | 561 | 1  |                     |
| 575 | 559 | 566 | 1  |                     |
| 576 | 560 | 567 | 1  |                     |
| 577 | 560 | 568 | 1  |                     |
| 578 | 560 | 569 | 1  |                     |
| 579 | 561 | 570 | 1  |                     |
| 580 | 561 | 571 | 1  |                     |
| 581 | 561 | 572 | 1  |                     |
| 582 | 573 | 574 | 1  | BACKBONE            |
| 583 | 573 | 578 | 1  |                     |
| 584 | 574 | 575 | 1  | BACKBONE            |
| 585 | 574 | 577 | 1  |                     |
| 586 | 574 | 579 | 1  |                     |

|     |     |     |    |                     |
|-----|-----|-----|----|---------------------|
| 587 | 575 | 576 | 2  | BACKBONE            |
| 588 | 575 | 583 | am | BACKBONE   INTERRES |
| 589 | 577 | 580 | 1  |                     |
| 590 | 577 | 581 | 1  |                     |
| 591 | 577 | 582 | 1  |                     |
| 592 | 583 | 584 | 1  | BACKBONE            |
| 593 | 583 | 589 | 1  |                     |
| 594 | 584 | 585 | 1  | BACKBONE            |
| 595 | 584 | 587 | 1  |                     |
| 596 | 584 | 590 | 1  |                     |
| 597 | 585 | 586 | 2  | BACKBONE            |
| 598 | 585 | 594 | am | BACKBONE   INTERRES |
| 599 | 587 | 588 | 1  |                     |
| 600 | 587 | 591 | 1  |                     |
| 601 | 587 | 592 | 1  |                     |
| 602 | 588 | 593 | 1  |                     |
| 603 | 594 | 595 | 1  | BACKBONE            |
| 604 | 594 | 599 | 1  |                     |
| 605 | 595 | 596 | 1  | BACKBONE            |
| 606 | 595 | 598 | 1  |                     |
| 607 | 595 | 600 | 1  |                     |
| 608 | 596 | 597 | 2  | BACKBONE            |
| 609 | 596 | 604 | am | BACKBONE   INTERRES |
| 610 | 598 | 601 | 1  |                     |
| 611 | 598 | 602 | 1  |                     |
| 612 | 598 | 603 | 1  |                     |
| 613 | 604 | 605 | 1  | BACKBONE            |
| 614 | 604 | 608 | 1  |                     |
| 615 | 605 | 606 | 1  | BACKBONE            |
| 616 | 605 | 609 | 1  |                     |
| 617 | 605 | 610 | 1  |                     |
| 618 | 606 | 607 | 2  | BACKBONE            |
| 619 | 606 | 611 | am | BACKBONE   INTERRES |
| 620 | 611 | 612 | 1  | BACKBONE            |
| 621 | 611 | 622 | 1  |                     |
| 622 | 612 | 613 | 1  | BACKBONE            |
| 623 | 612 | 615 | 1  |                     |
| 624 | 612 | 623 | 1  |                     |
| 625 | 613 | 614 | 2  | BACKBONE            |
| 626 | 613 | 631 | am | BACKBONE   INTERRES |
| 627 | 615 | 616 | 1  |                     |
| 628 | 615 | 624 | 1  |                     |
| 629 | 615 | 625 | 1  |                     |
| 630 | 616 | 617 | ar |                     |
| 631 | 616 | 618 | ar |                     |
| 632 | 617 | 619 | ar |                     |
| 633 | 617 | 626 | 1  |                     |
| 634 | 618 | 620 | ar |                     |
| 635 | 618 | 627 | 1  |                     |
| 636 | 619 | 621 | ar |                     |
| 637 | 619 | 628 | 1  |                     |
| 638 | 620 | 621 | ar |                     |

|     |     |     |    |                     |
|-----|-----|-----|----|---------------------|
| 639 | 620 | 629 | 1  |                     |
| 640 | 621 | 630 | 1  |                     |
| 641 | 631 | 632 | 1  | BACKBONE            |
| 642 | 631 | 643 | 1  |                     |
| 643 | 632 | 633 | 1  | BACKBONE            |
| 644 | 632 | 635 | 1  |                     |
| 645 | 632 | 644 | 1  |                     |
| 646 | 633 | 634 | 2  | BACKBONE            |
| 647 | 633 | 652 | am | BACKBONE   INTERRES |
| 648 | 635 | 636 | 1  |                     |
| 649 | 635 | 645 | 1  |                     |
| 650 | 635 | 646 | 1  |                     |
| 651 | 636 | 637 | ar |                     |
| 652 | 636 | 638 | ar |                     |
| 653 | 637 | 639 | ar |                     |
| 654 | 637 | 647 | 1  |                     |
| 655 | 638 | 640 | ar |                     |
| 656 | 638 | 648 | 1  |                     |
| 657 | 639 | 641 | ar |                     |
| 658 | 639 | 649 | 1  |                     |
| 659 | 640 | 641 | ar |                     |
| 660 | 640 | 650 | 1  |                     |
| 661 | 641 | 642 | 1  |                     |
| 662 | 642 | 651 | 1  |                     |
| 663 | 652 | 653 | 1  | BACKBONE            |
| 664 | 652 | 664 | 1  |                     |
| 665 | 653 | 654 | 1  | BACKBONE            |
| 666 | 653 | 656 | 1  |                     |
| 667 | 653 | 665 | 1  |                     |
| 668 | 654 | 655 | 2  | BACKBONE            |
| 669 | 654 | 673 | am | BACKBONE   INTERRES |
| 670 | 656 | 657 | 1  |                     |
| 671 | 656 | 666 | 1  |                     |
| 672 | 656 | 667 | 1  |                     |
| 673 | 657 | 658 | ar |                     |
| 674 | 657 | 659 | ar |                     |
| 675 | 658 | 660 | ar |                     |
| 676 | 658 | 668 | 1  |                     |
| 677 | 659 | 661 | ar |                     |
| 678 | 659 | 669 | 1  |                     |
| 679 | 660 | 662 | ar |                     |
| 680 | 660 | 670 | 1  |                     |
| 681 | 661 | 662 | ar |                     |
| 682 | 661 | 671 | 1  |                     |
| 683 | 662 | 663 | 1  |                     |
| 684 | 663 | 672 | 1  |                     |
| 685 | 673 | 674 | 1  | BACKBONE            |
| 686 | 673 | 680 | 1  |                     |
| 687 | 674 | 675 | 1  | BACKBONE            |
| 688 | 674 | 677 | 1  |                     |
| 689 | 674 | 681 | 1  |                     |
| 690 | 675 | 676 | 2  | BACKBONE            |



|     |     |     |    |                     |
|-----|-----|-----|----|---------------------|
| 691 | 675 | 689 | am | BACKBONE   INTERRES |
| 692 | 677 | 678 | 1  |                     |
| 693 | 677 | 679 | 1  |                     |
| 694 | 677 | 682 | 1  |                     |
| 695 | 678 | 683 | 1  |                     |
| 696 | 678 | 684 | 1  |                     |
| 697 | 678 | 685 | 1  |                     |
| 698 | 679 | 686 | 1  |                     |
| 699 | 679 | 687 | 1  |                     |
| 700 | 679 | 688 | 1  |                     |
| 701 | 689 | 690 | 1  | BACKBONE            |
| 702 | 689 | 693 | 1  |                     |
| 703 | 690 | 691 | 1  | BACKBONE            |
| 704 | 690 | 694 | 1  |                     |
| 705 | 690 | 695 | 1  |                     |
| 706 | 691 | 692 | 2  | BACKBONE            |
| 707 | 691 | 696 | am | BACKBONE   INTERRES |
| 708 | 696 | 697 | 1  | BACKBONE            |
| 709 | 696 | 704 | 1  |                     |
| 710 | 697 | 698 | 1  | BACKBONE            |
| 711 | 697 | 700 | 1  |                     |
| 712 | 697 | 705 | 1  |                     |
| 713 | 698 | 699 | 2  | BACKBONE            |
| 714 | 698 | 710 | am | BACKBONE   INTERRES |
| 715 | 700 | 701 | 1  |                     |
| 716 | 700 | 706 | 1  |                     |
| 717 | 700 | 707 | 1  |                     |
| 718 | 701 | 702 | 2  |                     |
| 719 | 701 | 703 | am |                     |
| 720 | 703 | 708 | 1  |                     |
| 721 | 703 | 709 | 1  |                     |
| 722 | 710 | 711 | 1  | BACKBONE            |
| 723 | 710 | 716 | 1  |                     |
| 724 | 711 | 712 | 1  | BACKBONE            |
| 725 | 711 | 714 | 1  |                     |
| 726 | 711 | 717 | 1  |                     |
| 727 | 712 | 713 | 2  | BACKBONE            |
| 728 | 712 | 721 | am | BACKBONE   INTERRES |
| 729 | 714 | 715 | 1  |                     |
| 730 | 714 | 718 | 1  |                     |
| 731 | 714 | 719 | 1  |                     |
| 732 | 715 | 720 | 1  |                     |
| 733 | 721 | 722 | 1  | BACKBONE            |
| 734 | 721 | 729 | 1  |                     |
| 735 | 722 | 723 | 1  | BACKBONE            |
| 736 | 722 | 725 | 1  |                     |
| 737 | 722 | 730 | 1  |                     |
| 738 | 723 | 724 | 2  | BACKBONE            |
| 739 | 723 | 733 | am | BACKBONE   INTERRES |
| 740 | 725 | 726 | 1  |                     |
| 741 | 725 | 731 | 1  |                     |
| 742 | 725 | 732 | 1  |                     |

|     |     |     |    |                     |
|-----|-----|-----|----|---------------------|
| 743 | 726 | 727 | ar |                     |
| 744 | 726 | 728 | ar |                     |
| 745 | 733 | 734 | 1  | BACKBONE            |
| 746 | 733 | 741 | 1  |                     |
| 747 | 734 | 735 | 1  | BACKBONE            |
| 748 | 734 | 737 | 1  |                     |
| 749 | 734 | 742 | 1  |                     |
| 750 | 735 | 736 | 2  | BACKBONE            |
| 751 | 735 | 745 | am | BACKBONE   INTERRES |
| 752 | 737 | 738 | 1  |                     |
| 753 | 737 | 743 | 1  |                     |
| 754 | 737 | 744 | 1  |                     |
| 755 | 738 | 739 | ar |                     |
| 756 | 738 | 740 | ar |                     |
| 757 | 745 | 746 | 1  | BACKBONE            |
| 758 | 745 | 752 | 1  |                     |
| 759 | 746 | 747 | 1  | BACKBONE            |
| 760 | 746 | 749 | 1  |                     |
| 761 | 746 | 753 | 1  |                     |
| 762 | 747 | 748 | 2  | BACKBONE            |
| 763 | 747 | 761 | am | BACKBONE   INTERRES |
| 764 | 749 | 750 | 1  |                     |
| 765 | 749 | 751 | 1  |                     |
| 766 | 749 | 754 | 1  |                     |
| 767 | 750 | 755 | 1  |                     |
| 768 | 750 | 756 | 1  |                     |
| 769 | 750 | 757 | 1  |                     |
| 770 | 751 | 758 | 1  |                     |
| 771 | 751 | 759 | 1  |                     |
| 772 | 751 | 760 | 1  |                     |
| 773 | 761 | 762 | 1  | BACKBONE            |
| 774 | 761 | 844 | 1  |                     |
| 775 | 762 | 763 | 1  | BACKBONE            |
| 776 | 762 | 765 | 1  |                     |
| 777 | 762 | 845 | 1  |                     |
| 778 | 763 | 764 | 2  | BACKBONE            |
| 779 | 763 | 854 | am | BACKBONE   INTERRES |
| 780 | 765 | 766 | 1  |                     |
| 781 | 765 | 846 | 1  |                     |
| 782 | 765 | 847 | 1  |                     |
| 783 | 766 | 767 | 1  |                     |
| 784 | 766 | 848 | 1  |                     |
| 785 | 766 | 849 | 1  |                     |
| 786 | 767 | 768 | 1  |                     |
| 787 | 767 | 850 | 1  |                     |
| 788 | 767 | 851 | 1  |                     |
| 789 | 768 | 798 | 1  |                     |
| 790 | 768 | 852 | 1  |                     |
| 791 | 768 | 853 | 1  |                     |
| 792 | 769 | 770 | 2  | BACKBONE            |
| 793 | 770 | 771 | am | BACKBONE            |
| 794 | 770 | 809 | 1  | BACKBONE            |

|     |     |     |    |          |
|-----|-----|-----|----|----------|
| 795 | 771 | 772 | 1  | BACKBONE |
| 796 | 771 | 806 | 1  | BACKBONE |
| 797 | 772 | 773 | 1  |          |
| 798 | 772 | 774 | 1  | BACKBONE |
| 799 | 772 | 800 | 1  | BACKBONE |
| 800 | 774 | 775 | am | BACKBONE |
| 801 | 774 | 799 | 2  | BACKBONE |
| 802 | 775 | 776 | 1  |          |
| 803 | 775 | 777 | 1  | BACKBONE |
| 804 | 777 | 778 | 1  |          |
| 805 | 777 | 779 | 1  | BACKBONE |
| 806 | 777 | 784 | 1  | BACKBONE |
| 807 | 779 | 780 | ar | BACKBONE |
| 808 | 779 | 792 | ar | BACKBONE |
| 809 | 780 | 781 | 1  | BACKBONE |
| 810 | 780 | 787 | ar | BACKBONE |
| 811 | 781 | 782 | 1  |          |
| 812 | 781 | 783 | 1  |          |
| 813 | 781 | 784 | 1  | BACKBONE |
| 814 | 784 | 785 | 1  |          |
| 815 | 784 | 786 | 1  |          |
| 816 | 787 | 788 | ar | BACKBONE |
| 817 | 787 | 794 | 1  | BACKBONE |
| 818 | 788 | 789 | 1  |          |
| 819 | 788 | 790 | ar | BACKBONE |
| 820 | 790 | 791 | 1  |          |
| 821 | 790 | 792 | ar | BACKBONE |
| 822 | 792 | 793 | 1  |          |
| 823 | 794 | 795 | 1  |          |
| 824 | 795 | 796 | 2  |          |
| 825 | 795 | 797 | 2  |          |
| 826 | 795 | 798 | am |          |
| 827 | 800 | 801 | 1  |          |
| 828 | 800 | 802 | 1  |          |
| 829 | 800 | 803 | 1  | BACKBONE |
| 830 | 803 | 804 | 1  |          |
| 831 | 803 | 805 | 1  |          |
| 832 | 803 | 806 | 1  | BACKBONE |
| 833 | 806 | 807 | 1  |          |
| 834 | 806 | 808 | 1  |          |
| 835 | 809 | 810 | 1  |          |
| 836 | 809 | 811 | 1  | BACKBONE |
| 837 | 809 | 827 | 1  | BACKBONE |
| 838 | 811 | 812 | 1  |          |
| 839 | 811 | 813 | am | BACKBONE |
| 840 | 813 | 814 | 1  | BACKBONE |
| 841 | 813 | 826 | 2  | BACKBONE |
| 842 | 814 | 815 | 1  |          |
| 843 | 814 | 816 | 1  | BACKBONE |
| 844 | 814 | 822 | 1  | BACKBONE |
| 845 | 816 | 817 | 1  |          |
| 846 | 816 | 818 | 1  | BACKBONE |

|     |     |     |    |                     |
|-----|-----|-----|----|---------------------|
| 847 | 818 | 819 | 1  |                     |
| 848 | 818 | 820 | 1  |                     |
| 849 | 818 | 821 | 1  |                     |
| 850 | 822 | 823 | 1  |                     |
| 851 | 822 | 824 | 1  |                     |
| 852 | 822 | 825 | 1  |                     |
| 853 | 827 | 828 | 1  |                     |
| 854 | 827 | 829 | 1  | BACKBONE            |
| 855 | 827 | 841 | 1  | BACKBONE            |
| 856 | 829 | 830 | 1  |                     |
| 857 | 829 | 831 | 1  |                     |
| 858 | 829 | 832 | 1  | BACKBONE            |
| 859 | 832 | 833 | 1  |                     |
| 860 | 832 | 834 | 1  |                     |
| 861 | 832 | 835 | 1  | BACKBONE            |
| 862 | 835 | 836 | 1  |                     |
| 863 | 835 | 837 | 1  |                     |
| 864 | 835 | 838 | 1  | BACKBONE            |
| 865 | 838 | 839 | 1  |                     |
| 866 | 838 | 840 | 1  |                     |
| 867 | 838 | 841 | 1  | BACKBONE            |
| 868 | 841 | 842 | 1  |                     |
| 869 | 841 | 843 | 1  |                     |
| 870 | 854 | 855 | 1  | BACKBONE            |
| 871 | 854 | 860 | 1  |                     |
| 872 | 855 | 856 | 1  | BACKBONE            |
| 873 | 855 | 858 | 1  |                     |
| 874 | 855 | 861 | 1  |                     |
| 875 | 856 | 857 | 2  | BACKBONE            |
| 876 | 856 | 866 | am | BACKBONE   INTERRES |
| 877 | 858 | 859 | 1  |                     |
| 878 | 858 | 862 | 1  |                     |
| 879 | 858 | 863 | 1  |                     |
| 880 | 859 | 864 | 1  |                     |
| 881 | 859 | 865 | 1  |                     |
| 882 | 866 | 867 | 1  | BACKBONE            |
| 883 | 866 | 877 | 1  |                     |
| 884 | 867 | 868 | 1  | BACKBONE            |
| 885 | 867 | 870 | 1  |                     |
| 886 | 867 | 878 | 1  |                     |
| 887 | 868 | 869 | 2  | BACKBONE            |
| 888 | 868 | 886 | am | BACKBONE   INTERRES |
| 889 | 870 | 871 | 1  |                     |
| 890 | 870 | 879 | 1  |                     |
| 891 | 870 | 880 | 1  |                     |
| 892 | 871 | 872 | ar |                     |
| 893 | 871 | 873 | ar |                     |
| 894 | 872 | 874 | ar |                     |
| 895 | 872 | 881 | 1  |                     |
| 896 | 873 | 875 | ar |                     |
| 897 | 873 | 882 | 1  |                     |
| 898 | 874 | 876 | ar |                     |

|     |     |     |    |                     |
|-----|-----|-----|----|---------------------|
| 899 | 874 | 883 | 1  |                     |
| 900 | 875 | 876 | ar |                     |
| 901 | 875 | 884 | 1  |                     |
| 902 | 876 | 885 | 1  |                     |
| 903 | 886 | 887 | 1  | BACKBONE            |
| 904 | 886 | 892 | 1  |                     |
| 905 | 887 | 888 | 1  | BACKBONE            |
| 906 | 887 | 890 | 1  |                     |
| 907 | 887 | 893 | 1  |                     |
| 908 | 888 | 889 | 2  | BACKBONE            |
| 909 | 888 | 899 | am | BACKBONE   INTERRES |
| 910 | 890 | 891 | 1  |                     |
| 911 | 890 | 894 | 1  |                     |
| 912 | 890 | 895 | 1  |                     |
| 913 | 891 | 896 | 1  |                     |
| 914 | 891 | 897 | 1  |                     |
| 915 | 891 | 898 | 1  |                     |
| 916 | 899 | 900 | 1  | BACKBONE            |
| 917 | 899 | 905 | 1  |                     |
| 918 | 900 | 901 | 1  | BACKBONE            |
| 919 | 900 | 903 | 1  |                     |
| 920 | 900 | 906 | 1  |                     |
| 921 | 901 | 902 | 2  | BACKBONE            |
| 922 | 901 | 911 | am | BACKBONE   INTERRES |
| 923 | 903 | 904 | 1  |                     |
| 924 | 903 | 907 | 1  |                     |
| 925 | 903 | 908 | 1  |                     |
| 926 | 904 | 909 | 1  |                     |
| 927 | 904 | 910 | 1  |                     |
| 928 | 911 | 912 | 1  | BACKBONE            |
| 929 | 911 | 919 | 1  |                     |
| 930 | 912 | 913 | 1  | BACKBONE            |
| 931 | 912 | 915 | 1  |                     |
| 932 | 912 | 920 | 1  |                     |
| 933 | 913 | 914 | 2  | BACKBONE            |
| 934 | 913 | 923 | am | BACKBONE   INTERRES |
| 935 | 915 | 916 | 1  |                     |
| 936 | 915 | 921 | 1  |                     |
| 937 | 915 | 922 | 1  |                     |
| 938 | 916 | 917 | ar |                     |
| 939 | 916 | 918 | ar |                     |
| 940 | 923 | 924 | 1  | BACKBONE            |
| 941 | 923 | 927 | 1  |                     |
| 942 | 924 | 925 | 1  | BACKBONE            |
| 943 | 924 | 928 | 1  |                     |
| 944 | 924 | 929 | 1  |                     |
| 945 | 925 | 926 | 2  | BACKBONE            |
| 946 | 925 | 930 | am | BACKBONE   INTERRES |
| 947 | 930 | 931 | 1  | BACKBONE            |
| 948 | 930 | 934 | 1  |                     |
| 949 | 931 | 932 | 1  | BACKBONE            |
| 950 | 931 | 935 | 1  |                     |

|      |     |     |    |                     |
|------|-----|-----|----|---------------------|
| 951  | 931 | 936 | 1  |                     |
| 952  | 932 | 933 | 2  | BACKBONE            |
| 953  | 932 | 937 | am | BACKBONE   INTERRES |
| 954  | 937 | 938 | 1  | BACKBONE            |
| 955  | 937 | 945 | 1  |                     |
| 956  | 938 | 939 | 1  | BACKBONE            |
| 957  | 938 | 941 | 1  |                     |
| 958  | 938 | 946 | 1  |                     |
| 959  | 939 | 940 | 2  | BACKBONE            |
| 960  | 939 | 956 | am | BACKBONE   INTERRES |
| 961  | 941 | 942 | 1  |                     |
| 962  | 941 | 947 | 1  |                     |
| 963  | 941 | 948 | 1  |                     |
| 964  | 942 | 943 | 1  |                     |
| 965  | 942 | 944 | 1  |                     |
| 966  | 942 | 949 | 1  |                     |
| 967  | 943 | 950 | 1  |                     |
| 968  | 943 | 951 | 1  |                     |
| 969  | 943 | 952 | 1  |                     |
| 970  | 944 | 953 | 1  |                     |
| 971  | 944 | 954 | 1  |                     |
| 972  | 944 | 955 | 1  |                     |
| 973  | 956 | 957 | 1  | BACKBONE            |
| 974  | 956 | 967 | 1  |                     |
| 975  | 957 | 958 | 1  | BACKBONE            |
| 976  | 957 | 960 | 1  |                     |
| 977  | 957 | 968 | 1  |                     |
| 978  | 958 | 959 | 2  | BACKBONE            |
| 979  | 958 | 980 | am | BACKBONE   INTERRES |
| 980  | 960 | 961 | 1  |                     |
| 981  | 960 | 969 | 1  |                     |
| 982  | 960 | 970 | 1  |                     |
| 983  | 961 | 962 | 1  |                     |
| 984  | 961 | 971 | 1  |                     |
| 985  | 961 | 972 | 1  |                     |
| 986  | 962 | 963 | 1  |                     |
| 987  | 962 | 973 | 1  |                     |
| 988  | 962 | 974 | 1  |                     |
| 989  | 963 | 964 | ar |                     |
| 990  | 963 | 975 | 1  |                     |
| 991  | 964 | 965 | ar |                     |
| 992  | 964 | 966 | ar |                     |
| 993  | 965 | 976 | 1  |                     |
| 994  | 965 | 977 | 1  |                     |
| 995  | 966 | 978 | 1  |                     |
| 996  | 966 | 979 | 1  |                     |
| 997  | 980 | 981 | 1  | BACKBONE            |
| 998  | 980 | 986 | 1  |                     |
| 999  | 981 | 982 | 1  | BACKBONE            |
| 1000 | 981 | 984 | 1  |                     |
| 1001 | 981 | 987 | 1  |                     |
| 1002 | 982 | 983 | 2  | BACKBONE            |

|      |      |      |    |                     |
|------|------|------|----|---------------------|
| 1003 | 982  | 993  | am | BACKBONE   INTERRES |
| 1004 | 984  | 985  | 1  |                     |
| 1005 | 984  | 988  | 1  |                     |
| 1006 | 984  | 989  | 1  |                     |
| 1007 | 985  | 990  | 1  |                     |
| 1008 | 985  | 991  | 1  |                     |
| 1009 | 985  | 992  | 1  |                     |
| 1010 | 993  | 994  | 1  | BACKBONE            |
| 1011 | 993  | 1007 | 1  |                     |
| 1012 | 994  | 995  | 1  | BACKBONE            |
| 1013 | 994  | 997  | 1  |                     |
| 1014 | 994  | 1008 | 1  |                     |
| 1015 | 995  | 996  | 2  | BACKBONE            |
| 1016 | 995  | 1017 | am | BACKBONE   INTERRES |
| 1017 | 997  | 998  | 1  |                     |
| 1018 | 997  | 1009 | 1  |                     |
| 1019 | 997  | 1010 | 1  |                     |
| 1020 | 998  | 999  | 2  |                     |
| 1021 | 998  | 1000 | 1  |                     |
| 1022 | 999  | 1001 | 1  |                     |
| 1023 | 999  | 1011 | 1  |                     |
| 1024 | 1000 | 1002 | ar |                     |
| 1025 | 1000 | 1003 | ar |                     |
| 1026 | 1001 | 1002 | 1  |                     |
| 1027 | 1001 | 1012 | 1  |                     |
| 1028 | 1002 | 1004 | ar |                     |
| 1029 | 1003 | 1005 | ar |                     |
| 1030 | 1003 | 1013 | 1  |                     |
| 1031 | 1004 | 1006 | ar |                     |
| 1032 | 1004 | 1014 | 1  |                     |
| 1033 | 1005 | 1006 | ar |                     |
| 1034 | 1005 | 1015 | 1  |                     |
| 1035 | 1006 | 1016 | 1  |                     |
| 1036 | 1017 | 1018 | 1  | BACKBONE            |
| 1037 | 1017 | 1026 | 1  |                     |
| 1038 | 1018 | 1019 | 1  | BACKBONE            |
| 1039 | 1018 | 1021 | 1  |                     |
| 1040 | 1018 | 1027 | 1  |                     |
| 1041 | 1019 | 1020 | 2  | BACKBONE            |
| 1042 | 1019 | 1032 | am | BACKBONE   INTERRES |
| 1043 | 1021 | 1022 | 1  |                     |
| 1044 | 1021 | 1028 | 1  |                     |
| 1045 | 1021 | 1029 | 1  |                     |
| 1046 | 1022 | 1023 | 1  |                     |
| 1047 | 1022 | 1030 | 1  |                     |
| 1048 | 1022 | 1031 | 1  |                     |
| 1049 | 1023 | 1024 | ar |                     |
| 1050 | 1023 | 1025 | ar |                     |
| 1051 | 1032 | 1033 | 1  | BACKBONE            |
| 1052 | 1032 | 1038 | 1  |                     |
| 1053 | 1033 | 1034 | 1  | BACKBONE            |
| 1054 | 1033 | 1036 | 1  |                     |

|      |      |      |    |                     |
|------|------|------|----|---------------------|
| 1055 | 1033 | 1039 | 1  |                     |
| 1056 | 1034 | 1035 | 2  | BACKBONE            |
| 1057 | 1034 | 1043 | am | BACKBONE   INTERRES |
| 1058 | 1036 | 1037 | 1  |                     |
| 1059 | 1036 | 1040 | 1  |                     |
| 1060 | 1036 | 1041 | 1  |                     |
| 1061 | 1037 | 1042 | 1  |                     |
| 1062 | 1043 | 1044 | 1  | BACKBONE            |
| 1063 | 1043 | 1047 | 1  |                     |
| 1064 | 1044 | 1045 | 1  | BACKBONE            |
| 1065 | 1044 | 1048 | 1  |                     |
| 1066 | 1044 | 1049 | 1  |                     |
| 1067 | 1045 | 1046 | 2  | BACKBONE            |
| 1068 | 1045 | 1050 | am | BACKBONE   INTERRES |
| 1069 | 1050 | 1051 | 1  | BACKBONE            |
| 1070 | 1050 | 1058 | 1  |                     |
| 1071 | 1051 | 1052 | 1  | BACKBONE            |
| 1072 | 1051 | 1054 | 1  |                     |
| 1073 | 1051 | 1059 | 1  |                     |
| 1074 | 1052 | 1053 | 2  | BACKBONE            |
| 1075 | 1052 | 1062 | am | BACKBONE   INTERRES |
| 1076 | 1054 | 1055 | 1  |                     |
| 1077 | 1054 | 1060 | 1  |                     |
| 1078 | 1054 | 1061 | 1  |                     |
| 1079 | 1055 | 1056 | ar |                     |
| 1080 | 1055 | 1057 | ar |                     |
| 1081 | 1062 | 1063 | 1  | BACKBONE            |
| 1082 | 1062 | 1070 | 1  |                     |
| 1083 | 1063 | 1064 | 1  | BACKBONE            |
| 1084 | 1063 | 1066 | 1  |                     |
| 1085 | 1063 | 1071 | 1  |                     |
| 1086 | 1064 | 1065 | 2  | BACKBONE            |
| 1087 | 1064 | 1074 | am | BACKBONE   INTERRES |
| 1088 | 1066 | 1067 | 1  |                     |
| 1089 | 1066 | 1072 | 1  |                     |
| 1090 | 1066 | 1073 | 1  |                     |
| 1091 | 1067 | 1068 | ar |                     |
| 1092 | 1067 | 1069 | ar |                     |
| 1093 | 1074 | 1075 | 1  | BACKBONE            |
| 1094 | 1074 | 1080 | 1  |                     |
| 1095 | 1075 | 1076 | 1  | BACKBONE            |
| 1096 | 1075 | 1078 | 1  |                     |
| 1097 | 1075 | 1081 | 1  |                     |
| 1098 | 1076 | 1077 | 2  | BACKBONE            |
| 1099 | 1076 | 1088 | am | BACKBONE   INTERRES |
| 1100 | 1078 | 1079 | 1  |                     |
| 1101 | 1078 | 1082 | 1  |                     |
| 1102 | 1078 | 1083 | 1  |                     |
| 1103 | 1079 | 1080 | 1  |                     |
| 1104 | 1079 | 1084 | 1  |                     |
| 1105 | 1079 | 1085 | 1  |                     |
| 1106 | 1080 | 1086 | 1  |                     |



|      |      |      |    |                     |
|------|------|------|----|---------------------|
| 1107 | 1080 | 1087 | 1  |                     |
| 1108 | 1088 | 1089 | 1  | BACKBONE            |
| 1109 | 1088 | 1102 | 1  |                     |
| 1110 | 1089 | 1090 | 1  | BACKBONE            |
| 1111 | 1089 | 1092 | 1  |                     |
| 1112 | 1089 | 1103 | 1  |                     |
| 1113 | 1090 | 1091 | 2  | BACKBONE            |
| 1114 | 1090 | 1112 | am | BACKBONE   INTERRES |
| 1115 | 1092 | 1093 | 1  |                     |
| 1116 | 1092 | 1104 | 1  |                     |
| 1117 | 1092 | 1105 | 1  |                     |
| 1118 | 1093 | 1094 | 2  |                     |
| 1119 | 1093 | 1095 | 1  |                     |
| 1120 | 1094 | 1096 | 1  |                     |
| 1121 | 1094 | 1106 | 1  |                     |
| 1122 | 1095 | 1097 | ar |                     |
| 1123 | 1095 | 1098 | ar |                     |
| 1124 | 1096 | 1097 | 1  |                     |
| 1125 | 1096 | 1107 | 1  |                     |
| 1126 | 1097 | 1099 | ar |                     |
| 1127 | 1098 | 1100 | ar |                     |
| 1128 | 1098 | 1108 | 1  |                     |
| 1129 | 1099 | 1101 | ar |                     |
| 1130 | 1099 | 1109 | 1  |                     |
| 1131 | 1100 | 1101 | ar |                     |
| 1132 | 1100 | 1110 | 1  |                     |
| 1133 | 1101 | 1111 | 1  |                     |
| 1134 | 1112 | 1113 | 1  | BACKBONE            |
| 1135 | 1112 | 1119 | 1  |                     |
| 1136 | 1113 | 1114 | 1  | BACKBONE            |
| 1137 | 1113 | 1116 | 1  |                     |
| 1138 | 1113 | 1120 | 1  |                     |
| 1139 | 1114 | 1115 | 2  | BACKBONE            |
| 1140 | 1114 | 1128 | am | BACKBONE   INTERRES |
| 1141 | 1116 | 1117 | 1  |                     |
| 1142 | 1116 | 1118 | 1  |                     |
| 1143 | 1116 | 1121 | 1  |                     |
| 1144 | 1117 | 1122 | 1  |                     |
| 1145 | 1117 | 1123 | 1  |                     |
| 1146 | 1117 | 1124 | 1  |                     |
| 1147 | 1118 | 1125 | 1  |                     |
| 1148 | 1118 | 1126 | 1  |                     |
| 1149 | 1118 | 1127 | 1  |                     |
| 1150 | 1128 | 1129 | 1  | BACKBONE            |
| 1151 | 1128 | 1137 | 1  |                     |
| 1152 | 1129 | 1130 | 1  | BACKBONE            |
| 1153 | 1129 | 1132 | 1  |                     |
| 1154 | 1129 | 1138 | 1  |                     |
| 1155 | 1130 | 1131 | 2  | BACKBONE            |
| 1156 | 1130 | 1145 | am | BACKBONE   INTERRES |
| 1157 | 1132 | 1133 | 1  |                     |
| 1158 | 1132 | 1139 | 1  |                     |

|      |      |      |    |                     |
|------|------|------|----|---------------------|
| 1159 | 1132 | 1140 | 1  |                     |
| 1160 | 1133 | 1134 | 1  |                     |
| 1161 | 1133 | 1141 | 1  |                     |
| 1162 | 1133 | 1142 | 1  |                     |
| 1163 | 1134 | 1135 | 2  |                     |
| 1164 | 1134 | 1136 | am |                     |
| 1165 | 1136 | 1143 | 1  |                     |
| 1166 | 1136 | 1144 | 1  |                     |
| 1167 | 1145 | 1146 | 1  | BACKBONE            |
| 1168 | 1145 | 1155 | 1  |                     |
| 1169 | 1146 | 1147 | 1  | BACKBONE            |
| 1170 | 1146 | 1149 | 1  |                     |
| 1171 | 1146 | 1156 | 1  |                     |
| 1172 | 1147 | 1148 | 2  | BACKBONE            |
| 1173 | 1147 | 1162 | am | BACKBONE   INTERRES |
| 1174 | 1149 | 1150 | 1  |                     |
| 1175 | 1149 | 1157 | 1  |                     |
| 1176 | 1149 | 1158 | 1  |                     |
| 1177 | 1150 | 1151 | 1  |                     |
| 1178 | 1150 | 1152 | 2  |                     |
| 1179 | 1151 | 1153 | ar |                     |
| 1180 | 1151 | 1159 | 1  |                     |
| 1181 | 1152 | 1154 | 1  |                     |
| 1182 | 1152 | 1160 | 1  |                     |
| 1183 | 1153 | 1154 | 1  |                     |
| 1184 | 1153 | 1161 | 1  |                     |
| 1185 | 1162 | 1163 | 1  | BACKBONE            |
| 1186 | 1162 | 1167 | 1  |                     |
| 1187 | 1163 | 1164 | 1  | BACKBONE            |
| 1188 | 1163 | 1166 | 1  |                     |
| 1189 | 1163 | 1168 | 1  |                     |
| 1190 | 1164 | 1165 | 2  | BACKBONE            |
| 1191 | 1164 | 1172 | am | BACKBONE   INTERRES |
| 1192 | 1166 | 1169 | 1  |                     |
| 1193 | 1166 | 1170 | 1  |                     |
| 1194 | 1166 | 1171 | 1  |                     |
| 1195 | 1172 | 1173 | 1  | BACKBONE            |
| 1196 | 1172 | 1181 | 1  |                     |
| 1197 | 1173 | 1174 | 1  | BACKBONE            |
| 1198 | 1173 | 1176 | 1  |                     |
| 1199 | 1173 | 1182 | 1  |                     |
| 1200 | 1174 | 1175 | 2  | BACKBONE            |
| 1201 | 1174 | 1194 | am | BACKBONE   INTERRES |
| 1202 | 1176 | 1177 | 1  |                     |
| 1203 | 1176 | 1183 | 1  |                     |
| 1204 | 1176 | 1184 | 1  |                     |
| 1205 | 1177 | 1178 | 1  |                     |
| 1206 | 1177 | 1185 | 1  |                     |
| 1207 | 1177 | 1186 | 1  |                     |
| 1208 | 1178 | 1179 | 1  |                     |
| 1209 | 1178 | 1187 | 1  |                     |
| 1210 | 1178 | 1188 | 1  |                     |

|      |      |      |    |                     |
|------|------|------|----|---------------------|
| 1211 | 1179 | 1180 | 1  |                     |
| 1212 | 1179 | 1189 | 1  |                     |
| 1213 | 1179 | 1190 | 1  |                     |
| 1214 | 1180 | 1191 | 1  |                     |
| 1215 | 1180 | 1192 | 1  |                     |
| 1216 | 1180 | 1193 | 1  |                     |
| 1217 | 1194 | 1195 | 1  | BACKBONE            |
| 1218 | 1194 | 1208 | 1  |                     |
| 1219 | 1195 | 1196 | 1  | BACKBONE            |
| 1220 | 1195 | 1198 | 1  |                     |
| 1221 | 1195 | 1209 | 1  |                     |
| 1222 | 1196 | 1197 | 2  | BACKBONE            |
| 1223 | 1196 | 1218 | am | BACKBONE   INTERRES |
| 1224 | 1198 | 1199 | 1  |                     |
| 1225 | 1198 | 1210 | 1  |                     |
| 1226 | 1198 | 1211 | 1  |                     |
| 1227 | 1199 | 1200 | 2  |                     |
| 1228 | 1199 | 1201 | 1  |                     |
| 1229 | 1200 | 1202 | 1  |                     |
| 1230 | 1200 | 1212 | 1  |                     |
| 1231 | 1201 | 1203 | ar |                     |
| 1232 | 1201 | 1204 | ar |                     |
| 1233 | 1202 | 1203 | 1  |                     |
| 1234 | 1202 | 1213 | 1  |                     |
| 1235 | 1203 | 1205 | ar |                     |
| 1236 | 1204 | 1206 | ar |                     |
| 1237 | 1204 | 1214 | 1  |                     |
| 1238 | 1205 | 1207 | ar |                     |
| 1239 | 1205 | 1215 | 1  |                     |
| 1240 | 1206 | 1207 | ar |                     |
| 1241 | 1206 | 1216 | 1  |                     |
| 1242 | 1207 | 1217 | 1  |                     |
| 1243 | 1218 | 1219 | 1  | BACKBONE            |
| 1244 | 1218 | 1229 | 1  |                     |
| 1245 | 1219 | 1220 | 1  | BACKBONE            |
| 1246 | 1219 | 1222 | 1  |                     |
| 1247 | 1219 | 1230 | 1  |                     |
| 1248 | 1220 | 1221 | 2  | BACKBONE            |
| 1249 | 1220 | 1238 | am | BACKBONE   INTERRES |
| 1250 | 1222 | 1223 | 1  |                     |
| 1251 | 1222 | 1231 | 1  |                     |
| 1252 | 1222 | 1232 | 1  |                     |
| 1253 | 1223 | 1224 | ar |                     |
| 1254 | 1223 | 1225 | ar |                     |
| 1255 | 1224 | 1226 | ar |                     |
| 1256 | 1224 | 1233 | 1  |                     |
| 1257 | 1225 | 1227 | ar |                     |
| 1258 | 1225 | 1234 | 1  |                     |
| 1259 | 1226 | 1228 | ar |                     |
| 1260 | 1226 | 1235 | 1  |                     |
| 1261 | 1227 | 1228 | ar |                     |
| 1262 | 1227 | 1236 | 1  |                     |

|      |      |      |    |                     |
|------|------|------|----|---------------------|
| 1263 | 1228 | 1237 | 1  |                     |
| 1264 | 1238 | 1239 | 1  | BACKBONE            |
| 1265 | 1238 | 1244 | 1  |                     |
| 1266 | 1239 | 1240 | 1  | BACKBONE            |
| 1267 | 1239 | 1242 | 1  |                     |
| 1268 | 1239 | 1245 | 1  |                     |
| 1269 | 1240 | 1241 | 2  | BACKBONE            |
| 1270 | 1240 | 1252 | am | BACKBONE   INTERRES |
| 1271 | 1242 | 1243 | 1  |                     |
| 1272 | 1242 | 1246 | 1  |                     |
| 1273 | 1242 | 1247 | 1  |                     |
| 1274 | 1243 | 1244 | 1  |                     |
| 1275 | 1243 | 1248 | 1  |                     |
| 1276 | 1243 | 1249 | 1  |                     |
| 1277 | 1244 | 1250 | 1  |                     |
| 1278 | 1244 | 1251 | 1  |                     |
| 1279 | 1252 | 1253 | 1  | BACKBONE            |
| 1280 | 1252 | 1263 | 1  |                     |
| 1281 | 1253 | 1254 | 1  | BACKBONE            |
| 1282 | 1253 | 1256 | 1  |                     |
| 1283 | 1253 | 1264 | 1  |                     |
| 1284 | 1254 | 1255 | 2  | BACKBONE            |
| 1285 | 1254 | 1276 | am | BACKBONE   INTERRES |
| 1286 | 1256 | 1257 | 1  |                     |
| 1287 | 1256 | 1265 | 1  |                     |
| 1288 | 1256 | 1266 | 1  |                     |
| 1289 | 1257 | 1258 | 1  |                     |
| 1290 | 1257 | 1267 | 1  |                     |
| 1291 | 1257 | 1268 | 1  |                     |
| 1292 | 1258 | 1259 | 1  |                     |
| 1293 | 1258 | 1269 | 1  |                     |
| 1294 | 1258 | 1270 | 1  |                     |
| 1295 | 1259 | 1260 | ar |                     |
| 1296 | 1259 | 1271 | 1  |                     |
| 1297 | 1260 | 1261 | ar |                     |
| 1298 | 1260 | 1262 | ar |                     |
| 1299 | 1261 | 1272 | 1  |                     |
| 1300 | 1261 | 1273 | 1  |                     |
| 1301 | 1262 | 1274 | 1  |                     |
| 1302 | 1262 | 1275 | 1  |                     |
| 1303 | 1276 | 1277 | 1  | BACKBONE            |
| 1304 | 1276 | 1282 | 1  |                     |
| 1305 | 1277 | 1278 | 1  | BACKBONE            |
| 1306 | 1277 | 1280 | 1  |                     |
| 1307 | 1277 | 1283 | 1  |                     |
| 1308 | 1278 | 1279 | 2  | BACKBONE            |
| 1309 | 1278 | 1288 | am | BACKBONE   INTERRES |
| 1310 | 1280 | 1281 | 1  |                     |
| 1311 | 1280 | 1284 | 1  |                     |
| 1312 | 1280 | 1285 | 1  |                     |
| 1313 | 1281 | 1286 | 1  |                     |
| 1314 | 1281 | 1287 | 1  |                     |

|      |      |      |    |                     |
|------|------|------|----|---------------------|
| 1315 | 1288 | 1289 | 1  | BACKBONE            |
| 1316 | 1288 | 1297 | 1  |                     |
| 1317 | 1289 | 1290 | 1  | BACKBONE            |
| 1318 | 1289 | 1292 | 1  |                     |
| 1319 | 1289 | 1298 | 1  |                     |
| 1320 | 1290 | 1291 | 2  | BACKBONE            |
| 1321 | 1290 | 1303 | am | BACKBONE   INTERRES |
| 1322 | 1292 | 1293 | 1  |                     |
| 1323 | 1292 | 1299 | 1  |                     |
| 1324 | 1292 | 1300 | 1  |                     |
| 1325 | 1293 | 1294 | 1  |                     |
| 1326 | 1293 | 1301 | 1  |                     |
| 1327 | 1293 | 1302 | 1  |                     |
| 1328 | 1294 | 1295 | ar |                     |
| 1329 | 1294 | 1296 | ar |                     |
| 1330 | 1303 | 1304 | 1  | BACKBONE            |
| 1331 | 1303 | 1315 | 1  |                     |
| 1332 | 1304 | 1305 | 1  | BACKBONE            |
| 1333 | 1304 | 1307 | 1  |                     |
| 1334 | 1304 | 1316 | 1  |                     |
| 1335 | 1305 | 1306 | 2  | BACKBONE            |
| 1336 | 1305 | 1324 | am | BACKBONE   INTERRES |
| 1337 | 1307 | 1308 | 1  |                     |
| 1338 | 1307 | 1317 | 1  |                     |
| 1339 | 1307 | 1318 | 1  |                     |
| 1340 | 1308 | 1309 | ar |                     |
| 1341 | 1308 | 1310 | ar |                     |
| 1342 | 1309 | 1311 | ar |                     |
| 1343 | 1309 | 1319 | 1  |                     |
| 1344 | 1310 | 1312 | ar |                     |
| 1345 | 1310 | 1320 | 1  |                     |
| 1346 | 1311 | 1313 | ar |                     |
| 1347 | 1311 | 1321 | 1  |                     |
| 1348 | 1312 | 1313 | ar |                     |
| 1349 | 1312 | 1322 | 1  |                     |
| 1350 | 1313 | 1314 | 1  |                     |
| 1351 | 1314 | 1323 | 1  |                     |
| 1352 | 1324 | 1325 | 1  | BACKBONE            |
| 1353 | 1324 | 1332 | 1  |                     |
| 1354 | 1325 | 1326 | 1  | BACKBONE            |
| 1355 | 1325 | 1328 | 1  |                     |
| 1356 | 1325 | 1333 | 1  |                     |
| 1357 | 1326 | 1327 | 2  | BACKBONE            |
| 1358 | 1326 | 1343 | am | BACKBONE   INTERRES |
| 1359 | 1328 | 1329 | 1  |                     |
| 1360 | 1328 | 1334 | 1  |                     |
| 1361 | 1328 | 1335 | 1  |                     |
| 1362 | 1329 | 1330 | 1  |                     |
| 1363 | 1329 | 1331 | 1  |                     |
| 1364 | 1329 | 1336 | 1  |                     |
| 1365 | 1330 | 1337 | 1  |                     |
| 1366 | 1330 | 1338 | 1  |                     |

|      |      |      |    |                     |
|------|------|------|----|---------------------|
| 1367 | 1330 | 1339 | 1  |                     |
| 1368 | 1331 | 1340 | 1  |                     |
| 1369 | 1331 | 1341 | 1  |                     |
| 1370 | 1331 | 1342 | 1  |                     |
| 1371 | 1343 | 1344 | 1  | BACKBONE            |
| 1372 | 1343 | 1351 | 1  |                     |
| 1373 | 1344 | 1345 | 1  | BACKBONE            |
| 1374 | 1344 | 1347 | 1  |                     |
| 1375 | 1344 | 1352 | 1  |                     |
| 1376 | 1345 | 1346 | 2  | BACKBONE            |
| 1377 | 1345 | 1362 | am | BACKBONE   INTERRES |
| 1378 | 1347 | 1348 | 1  |                     |
| 1379 | 1347 | 1349 | 1  |                     |
| 1380 | 1347 | 1353 | 1  |                     |
| 1381 | 1348 | 1350 | 1  |                     |
| 1382 | 1348 | 1354 | 1  |                     |
| 1383 | 1348 | 1355 | 1  |                     |
| 1384 | 1349 | 1356 | 1  |                     |
| 1385 | 1349 | 1357 | 1  |                     |
| 1386 | 1349 | 1358 | 1  |                     |
| 1387 | 1350 | 1359 | 1  |                     |
| 1388 | 1350 | 1360 | 1  |                     |
| 1389 | 1350 | 1361 | 1  |                     |
| 1390 | 1362 | 1363 | 1  | BACKBONE            |
| 1391 | 1362 | 1373 | 1  |                     |
| 1392 | 1363 | 1364 | 1  | BACKBONE            |
| 1393 | 1363 | 1366 | 1  |                     |
| 1394 | 1363 | 1374 | 1  |                     |
| 1395 | 1364 | 1365 | 2  | BACKBONE            |
| 1396 | 1364 | 1386 | am | BACKBONE   INTERRES |
| 1397 | 1366 | 1367 | 1  |                     |
| 1398 | 1366 | 1375 | 1  |                     |
| 1399 | 1366 | 1376 | 1  |                     |
| 1400 | 1367 | 1368 | 1  |                     |
| 1401 | 1367 | 1377 | 1  |                     |
| 1402 | 1367 | 1378 | 1  |                     |
| 1403 | 1368 | 1369 | 1  |                     |
| 1404 | 1368 | 1379 | 1  |                     |
| 1405 | 1368 | 1380 | 1  |                     |
| 1406 | 1369 | 1370 | ar |                     |
| 1407 | 1369 | 1381 | 1  |                     |
| 1408 | 1370 | 1371 | ar |                     |
| 1409 | 1370 | 1372 | ar |                     |
| 1410 | 1371 | 1382 | 1  |                     |
| 1411 | 1371 | 1383 | 1  |                     |
| 1412 | 1372 | 1384 | 1  |                     |
| 1413 | 1372 | 1385 | 1  |                     |
| 1414 | 1386 | 1387 | 1  | BACKBONE            |
| 1415 | 1386 | 1394 | 1  |                     |
| 1416 | 1387 | 1388 | 1  | BACKBONE            |
| 1417 | 1387 | 1390 | 1  |                     |
| 1418 | 1387 | 1395 | 1  |                     |

|      |      |      |    |                     |
|------|------|------|----|---------------------|
| 1419 | 1388 | 1389 | 2  | BACKBONE            |
| 1420 | 1388 | 1405 | am | BACKBONE   INTERRES |
| 1421 | 1390 | 1391 | 1  |                     |
| 1422 | 1390 | 1392 | 1  |                     |
| 1423 | 1390 | 1396 | 1  |                     |
| 1424 | 1391 | 1393 | 1  |                     |
| 1425 | 1391 | 1397 | 1  |                     |
| 1426 | 1391 | 1398 | 1  |                     |
| 1427 | 1392 | 1399 | 1  |                     |
| 1428 | 1392 | 1400 | 1  |                     |
| 1429 | 1392 | 1401 | 1  |                     |
| 1430 | 1393 | 1402 | 1  |                     |
| 1431 | 1393 | 1403 | 1  |                     |
| 1432 | 1393 | 1404 | 1  |                     |
| 1433 | 1405 | 1406 | 1  | BACKBONE            |
| 1434 | 1405 | 1414 | 1  |                     |
| 1435 | 1406 | 1407 | 1  | BACKBONE            |
| 1436 | 1406 | 1409 | 1  |                     |
| 1437 | 1406 | 1415 | 1  |                     |
| 1438 | 1407 | 1408 | 2  | BACKBONE            |
| 1439 | 1407 | 1427 | am | BACKBONE   INTERRES |
| 1440 | 1409 | 1410 | 1  |                     |
| 1441 | 1409 | 1416 | 1  |                     |
| 1442 | 1409 | 1417 | 1  |                     |
| 1443 | 1410 | 1411 | 1  |                     |
| 1444 | 1410 | 1418 | 1  |                     |
| 1445 | 1410 | 1419 | 1  |                     |
| 1446 | 1411 | 1412 | 1  |                     |
| 1447 | 1411 | 1420 | 1  |                     |
| 1448 | 1411 | 1421 | 1  |                     |
| 1449 | 1412 | 1413 | 1  |                     |
| 1450 | 1412 | 1422 | 1  |                     |
| 1451 | 1412 | 1423 | 1  |                     |
| 1452 | 1413 | 1424 | 1  |                     |
| 1453 | 1413 | 1425 | 1  |                     |
| 1454 | 1413 | 1426 | 1  |                     |
| 1455 | 1427 | 1428 | 1  | BACKBONE            |
| 1456 | 1427 | 1431 | 1  |                     |
| 1457 | 1428 | 1429 | 1  | BACKBONE            |
| 1458 | 1428 | 1432 | 1  |                     |
| 1459 | 1428 | 1433 | 1  |                     |
| 1460 | 1429 | 1430 | 2  | BACKBONE            |
| 1461 | 1429 | 1434 | am | BACKBONE   INTERRES |
| 1462 | 1434 | 1435 | 1  | BACKBONE            |
| 1463 | 1434 | 1443 | 1  |                     |
| 1464 | 1435 | 1436 | 1  | BACKBONE            |
| 1465 | 1435 | 1438 | 1  |                     |
| 1466 | 1435 | 1444 | 1  |                     |
| 1467 | 1436 | 1437 | 2  | BACKBONE            |
| 1468 | 1436 | 1451 | am | BACKBONE   INTERRES |
| 1469 | 1438 | 1439 | 1  |                     |
| 1470 | 1438 | 1445 | 1  |                     |

|      |      |      |    |                     |
|------|------|------|----|---------------------|
| 1471 | 1438 | 1446 | 1  |                     |
| 1472 | 1439 | 1440 | 1  |                     |
| 1473 | 1439 | 1447 | 1  |                     |
| 1474 | 1439 | 1448 | 1  |                     |
| 1475 | 1440 | 1441 | 2  |                     |
| 1476 | 1440 | 1442 | am |                     |
| 1477 | 1442 | 1449 | 1  |                     |
| 1478 | 1442 | 1450 | 1  |                     |
| 1479 | 1451 | 1452 | 1  | BACKBONE            |
| 1480 | 1451 | 1460 | 1  |                     |
| 1481 | 1452 | 1453 | 1  | BACKBONE            |
| 1482 | 1452 | 1455 | 1  |                     |
| 1483 | 1452 | 1461 | 1  |                     |
| 1484 | 1453 | 1454 | 2  | BACKBONE            |
| 1485 | 1453 | 1466 | am | BACKBONE   INTERRES |
| 1486 | 1455 | 1456 | 1  |                     |
| 1487 | 1455 | 1462 | 1  |                     |
| 1488 | 1455 | 1463 | 1  |                     |
| 1489 | 1456 | 1457 | 1  |                     |
| 1490 | 1456 | 1464 | 1  |                     |
| 1491 | 1456 | 1465 | 1  |                     |
| 1492 | 1457 | 1458 | ar |                     |
| 1493 | 1457 | 1459 | ar |                     |
| 1494 | 1466 | 1467 | 1  | BACKBONE            |
| 1495 | 1466 | 1477 | 1  |                     |
| 1496 | 1467 | 1468 | 1  | BACKBONE            |
| 1497 | 1467 | 1470 | 1  |                     |
| 1498 | 1467 | 1478 | 1  |                     |
| 1499 | 1468 | 1469 | 2  | BACKBONE            |
| 1500 | 1468 | 1486 | am | BACKBONE   INTERRES |
| 1501 | 1470 | 1471 | 1  |                     |
| 1502 | 1470 | 1479 | 1  |                     |
| 1503 | 1470 | 1480 | 1  |                     |
| 1504 | 1471 | 1472 | ar |                     |
| 1505 | 1471 | 1473 | ar |                     |
| 1506 | 1472 | 1474 | ar |                     |
| 1507 | 1472 | 1481 | 1  |                     |
| 1508 | 1473 | 1475 | ar |                     |
| 1509 | 1473 | 1482 | 1  |                     |
| 1510 | 1474 | 1476 | ar |                     |
| 1511 | 1474 | 1483 | 1  |                     |
| 1512 | 1475 | 1476 | ar |                     |
| 1513 | 1475 | 1484 | 1  |                     |
| 1514 | 1476 | 1485 | 1  |                     |
| 1515 | 1486 | 1487 | 1  | BACKBONE            |
| 1516 | 1486 | 1494 | 1  |                     |
| 1517 | 1487 | 1488 | 1  | BACKBONE            |
| 1518 | 1487 | 1490 | 1  |                     |
| 1519 | 1487 | 1495 | 1  |                     |
| 1520 | 1488 | 1489 | 2  | BACKBONE            |
| 1521 | 1488 | 1505 | am | BACKBONE   INTERRES |
| 1522 | 1490 | 1491 | 1  |                     |



|      |      |      |    |                     |
|------|------|------|----|---------------------|
| 1523 | 1490 | 1492 | 1  |                     |
| 1524 | 1490 | 1496 | 1  |                     |
| 1525 | 1491 | 1493 | 1  |                     |
| 1526 | 1491 | 1497 | 1  |                     |
| 1527 | 1491 | 1498 | 1  |                     |
| 1528 | 1492 | 1499 | 1  |                     |
| 1529 | 1492 | 1500 | 1  |                     |
| 1530 | 1492 | 1501 | 1  |                     |
| 1531 | 1493 | 1502 | 1  |                     |
| 1532 | 1493 | 1503 | 1  |                     |
| 1533 | 1493 | 1504 | 1  |                     |
| 1534 | 1505 | 1506 | 1  | BACKBONE            |
| 1535 | 1505 | 1516 | 1  |                     |
| 1536 | 1506 | 1507 | 1  | BACKBONE            |
| 1537 | 1506 | 1509 | 1  |                     |
| 1538 | 1506 | 1517 | 1  |                     |
| 1539 | 1507 | 1508 | 2  | BACKBONE            |
| 1540 | 1507 | 1529 | am | BACKBONE   INTERRES |
| 1541 | 1509 | 1510 | 1  |                     |
| 1542 | 1509 | 1518 | 1  |                     |
| 1543 | 1509 | 1519 | 1  |                     |
| 1544 | 1510 | 1511 | 1  |                     |
| 1545 | 1510 | 1520 | 1  |                     |
| 1546 | 1510 | 1521 | 1  |                     |
| 1547 | 1511 | 1512 | 1  |                     |
| 1548 | 1511 | 1522 | 1  |                     |
| 1549 | 1511 | 1523 | 1  |                     |
| 1550 | 1512 | 1513 | ar |                     |
| 1551 | 1512 | 1524 | 1  |                     |
| 1552 | 1513 | 1514 | ar |                     |
| 1553 | 1513 | 1515 | ar |                     |
| 1554 | 1514 | 1525 | 1  |                     |
| 1555 | 1514 | 1526 | 1  |                     |
| 1556 | 1515 | 1527 | 1  |                     |
| 1557 | 1515 | 1528 | 1  |                     |
| 1558 | 1529 | 1530 | 1  | BACKBONE            |
| 1559 | 1529 | 1538 | 1  |                     |
| 1560 | 1530 | 1531 | 1  | BACKBONE            |
| 1561 | 1530 | 1533 | 1  |                     |
| 1562 | 1530 | 1539 | 1  |                     |
| 1563 | 1531 | 1532 | 2  | BACKBONE            |
| 1564 | 1531 | 1546 | am | BACKBONE   INTERRES |
| 1565 | 1533 | 1534 | 1  |                     |
| 1566 | 1533 | 1540 | 1  |                     |
| 1567 | 1533 | 1541 | 1  |                     |
| 1568 | 1534 | 1535 | 1  |                     |
| 1569 | 1534 | 1542 | 1  |                     |
| 1570 | 1534 | 1543 | 1  |                     |
| 1571 | 1535 | 1536 | 2  |                     |
| 1572 | 1535 | 1537 | am |                     |
| 1573 | 1537 | 1544 | 1  |                     |
| 1574 | 1537 | 1545 | 1  |                     |

|      |      |      |    |                     |
|------|------|------|----|---------------------|
| 1575 | 1546 | 1547 | 1  | BACKBONE            |
| 1576 | 1546 | 1553 | 1  |                     |
| 1577 | 1547 | 1548 | 1  | BACKBONE            |
| 1578 | 1547 | 1550 | 1  |                     |
| 1579 | 1547 | 1554 | 1  |                     |
| 1580 | 1548 | 1549 | 2  | BACKBONE            |
| 1581 | 1548 | 1562 | am | BACKBONE   INTERRES |
| 1582 | 1550 | 1551 | 1  |                     |
| 1583 | 1550 | 1552 | 1  |                     |
| 1584 | 1550 | 1555 | 1  |                     |
| 1585 | 1551 | 1556 | 1  |                     |
| 1586 | 1551 | 1557 | 1  |                     |
| 1587 | 1551 | 1558 | 1  |                     |
| 1588 | 1552 | 1559 | 1  |                     |
| 1589 | 1552 | 1560 | 1  |                     |
| 1590 | 1552 | 1561 | 1  |                     |
| 1591 | 1562 | 1563 | 1  | BACKBONE            |
| 1592 | 1562 | 1571 | 1  |                     |
| 1593 | 1563 | 1564 | 1  | BACKBONE            |
| 1594 | 1563 | 1566 | 1  |                     |
| 1595 | 1563 | 1572 | 1  |                     |
| 1596 | 1564 | 1565 | 2  | BACKBONE            |
| 1597 | 1566 | 1567 | 1  |                     |
| 1598 | 1566 | 1573 | 1  |                     |
| 1599 | 1566 | 1574 | 1  |                     |
| 1600 | 1567 | 1568 | 1  |                     |
| 1601 | 1567 | 1575 | 1  |                     |
| 1602 | 1567 | 1576 | 1  |                     |
| 1603 | 1568 | 1569 | 2  |                     |
| 1604 | 1568 | 1570 | am |                     |
| 1605 | 1570 | 1577 | 1  |                     |
| 1606 | 1570 | 1578 | 1  |                     |

@<TRIPOS>SUBSTRUCTURE

|    |        |     |         |   |   |     |   |
|----|--------|-----|---------|---|---|-----|---|
| 1  | SER242 | 2   | RESIDUE | 4 | A | SER | 1 |
| 2  | MET243 | 14  | RESIDUE | 4 | A | MET | 2 |
| 3  | ARG244 | 33  | RESIDUE | 4 | A | ARG | 2 |
| 4  | TYR245 | 57  | RESIDUE | 4 | A | TYR | 2 |
| 5  | THR246 | 78  | RESIDUE | 4 | A | THR | 2 |
| 6  | VAL247 | 92  | RESIDUE | 4 | A | VAL | 2 |
| 7  | SER248 | 108 | RESIDUE | 4 | A | SER | 2 |
| 8  | ASN249 | 119 | RESIDUE | 4 | A | ASN | 2 |
| 9  | LEU250 | 133 | RESIDUE | 4 | A | LEU | 2 |
| 10 | SER251 | 152 | RESIDUE | 4 | A | SER | 2 |
| 11 | MET252 | 163 | RESIDUE | 4 | A | MET | 2 |
| 12 | GLN253 | 182 | RESIDUE | 4 | A | GLN | 2 |
| 13 | THR254 | 199 | RESIDUE | 4 | A | THR | 2 |
| 14 | HIS255 | 213 | RESIDUE | 4 | A | HIS | 2 |
| 15 | ALA256 | 230 | RESIDUE | 4 | A | ALA | 2 |
| 16 | ALA257 | 240 | RESIDUE | 4 | A | ALA | 2 |
| 17 | ARG258 | 250 | RESIDUE | 4 | A | ARG | 2 |
| 18 | PHE259 | 274 | RESIDUE | 4 | A | PHE | 2 |
| 19 | LYS260 | 294 | RESIDUE | 4 | A | LYS | 2 |

|    |        |      |         |   |   |     |   |
|----|--------|------|---------|---|---|-----|---|
| 20 | THR261 | 316  | RESIDUE | 4 | A | THR | 2 |
| 21 | PHE262 | 330  | RESIDUE | 4 | A | PHE | 2 |
| 22 | PHE263 | 350  | RESIDUE | 4 | A | PHE | 2 |
| 23 | ASN264 | 370  | RESIDUE | 4 | A | ASN | 2 |
| 24 | TRP265 | 384  | RESIDUE | 4 | A | TRP | 2 |
| 25 | PRO266 | 408  | RESIDUE | 4 | A | PRO | 2 |
| 26 | SER267 | 422  | RESIDUE | 4 | A | SER | 2 |
| 27 | SER268 | 433  | RESIDUE | 4 | A | SER | 2 |
| 28 | VAL269 | 444  | RESIDUE | 4 | A | VAL | 2 |
| 29 | LEU270 | 460  | RESIDUE | 4 | A | LEU | 2 |
| 30 | VAL271 | 479  | RESIDUE | 4 | A | VAL | 2 |
| 31 | ASN272 | 495  | RESIDUE | 4 | A | ASN | 2 |
| 32 | PRO273 | 509  | RESIDUE | 4 | A | PRO | 2 |
| 33 | GLU274 | 523  | RESIDUE | 4 | A | GLU | 2 |
| 34 | GLN275 | 538  | RESIDUE | 4 | A | GLN | 2 |
| 35 | LEU276 | 555  | RESIDUE | 4 | A | LEU | 2 |
| 36 | ALA277 | 574  | RESIDUE | 4 | A | ALA | 2 |
| 37 | SER278 | 584  | RESIDUE | 4 | A | SER | 2 |
| 38 | ALA279 | 595  | RESIDUE | 4 | A | ALA | 2 |
| 39 | GLY280 | 605  | RESIDUE | 4 | A | GLY | 2 |
| 40 | PHE281 | 612  | RESIDUE | 4 | A | PHE | 2 |
| 41 | TYR282 | 632  | RESIDUE | 4 | A | TYR | 2 |
| 42 | TYR283 | 653  | RESIDUE | 4 | A | TYR | 2 |
| 43 | VAL284 | 674  | RESIDUE | 4 | A | VAL | 2 |
| 44 | GLY285 | 690  | RESIDUE | 4 | A | GLY | 2 |
| 45 | ASN286 | 697  | RESIDUE | 4 | A | ASN | 2 |
| 46 | SER287 | 711  | RESIDUE | 4 | A | SER | 2 |
| 47 | ASP288 | 722  | RESIDUE | 4 | A | ASP | 2 |
| 48 | ASP289 | 734  | RESIDUE | 4 | A | ASP | 2 |
| 49 | VAL290 | 746  | RESIDUE | 4 | A | VAL | 2 |
| 50 | LYS291 | 762  | RESIDUE | 4 | A | LYS | 2 |
| 51 | CYS292 | 855  | RESIDUE | 4 | A | CYS | 2 |
| 52 | PHE293 | 867  | RESIDUE | 4 | A | PHE | 2 |
| 53 | CYS294 | 887  | RESIDUE | 4 | A | CYS | 2 |
| 54 | CYS295 | 900  | RESIDUE | 4 | A | CYS | 2 |
| 55 | ASP296 | 912  | RESIDUE | 4 | A | ASP | 2 |
| 56 | GLY297 | 924  | RESIDUE | 4 | A | GLY | 2 |
| 57 | GLY298 | 931  | RESIDUE | 4 | A | GLY | 2 |
| 58 | LEU299 | 938  | RESIDUE | 4 | A | LEU | 2 |
| 59 | ARG300 | 957  | RESIDUE | 4 | A | ARG | 2 |
| 60 | CYS301 | 981  | RESIDUE | 4 | A | CYS | 2 |
| 61 | TRP302 | 994  | RESIDUE | 4 | A | TRP | 2 |
| 62 | GLU303 | 1018 | RESIDUE | 4 | A | GLU | 2 |
| 63 | SER304 | 1033 | RESIDUE | 4 | A | SER | 2 |
| 64 | GLY305 | 1044 | RESIDUE | 4 | A | GLY | 2 |
| 65 | ASP306 | 1051 | RESIDUE | 4 | A | ASP | 2 |
| 66 | ASP307 | 1063 | RESIDUE | 4 | A | ASP | 2 |
| 67 | PRO308 | 1075 | RESIDUE | 4 | A | PRO | 2 |
| 68 | TRP309 | 1089 | RESIDUE | 4 | A | TRP | 2 |
| 69 | VAL310 | 1113 | RESIDUE | 4 | A | VAL | 2 |
| 70 | GLN311 | 1129 | RESIDUE | 4 | A | GLN | 2 |
| 71 | HIS312 | 1146 | RESIDUE | 4 | A | HIS | 2 |

72 ALA313 1163 RESIDUE 4 A ALA 2  
73 LYS314 1173 RESIDUE 4 A LYS 2  
74 TRP315 1195 RESIDUE 4 A TRP 2  
75 PHE316 1219 RESIDUE 4 A PHE 2  
76 PRO317 1239 RESIDUE 4 A PRO 2  
77 ARG318 1253 RESIDUE 4 A ARG 2  
78 CYS319 1277 RESIDUE 4 A CYS 2  
79 GLU320 1289 RESIDUE 4 A GLU 2  
80 TYR321 1304 RESIDUE 4 A TYR 2  
81 LEU322 1325 RESIDUE 4 A LEU 2  
82 ILE323 1344 RESIDUE 4 A ILE 2  
83 ARG324 1363 RESIDUE 4 A ARG 2  
84 ILE325 1387 RESIDUE 4 A ILE 2  
85 LYS326 1406 RESIDUE 4 A LYS 2  
86 GLY327 1428 RESIDUE 4 A GLY 2  
87 GLN328 1435 RESIDUE 4 A GLN 2  
88 GLU329 1452 RESIDUE 4 A GLU 2  
89 PHE330 1467 RESIDUE 4 A PHE 2  
90 ILE331 1487 RESIDUE 4 A ILE 2  
91 ARG332 1506 RESIDUE 4 A ARG 2  
92 GLN333 1530 RESIDUE 4 A GLN 2  
93 VAL334 1547 RESIDUE 4 A VAL 2  
94 GLN335 1563 RESIDUE 4 A GLN 1

# MOE 2019.01 (io\_trps.svl 2018.10)
